# Supplementary material for: Transcriptome regulation of carotenoids in five flesh-colored watermelon (Citrullus lanatus)
Source: Research Square preprint supplement (doi:10.21203/rs.3.rs-42816/v2), 2021-01-12
Supplement: Supplementary file 1 [file d9d9bcef316428b74f084449.xlsx]

## Sheet: O_20vsO_10.DEG
Gene_id	readcount_O_2	readcount_O_1	log2FoldChange	pval	padj	up_down	Blast swiss prot
Cla000011	381.243	165.861	1.2007	5.6878e-05	0.00043196	up	sp|P24465|C71A1_PERAE Cytochrome P450 71A1 OS=Persea americana GN=CYP71A1 PE=1 SV=2//8.25294e-64
Cla000027	613.273	311.654	0.97658	0.00020244	0.0013068	up	sp|Q9LTR2|TGD2_ARATH Protein TRIGALACTOSYLDIACYLGLYCEROL 2, chloroplastic OS=Arabidopsis thaliana GN=TGD2 PE=2 SV=1//2.21264e-63
Cla000040	566.31	109.955	2.3647	1.9779e-14	7.465e-13	up	sp|P19037|HS181_ARATH 18.1 kDa class I heat shock protein OS=Arabidopsis thaliana GN=HSP18.1 PE=2 SV=1//2.28337e-71
Cla000129	3456.03	981.157	1.8166	4.2101e-16	1.9834e-14	up	sp|Q6NPF9|TRXY1_ARATH Thioredoxin Y1, chloroplastic OS=Arabidopsis thaliana GN=At1g76760 PE=2 SV=1//3.86818e-50
Cla000142	7601.61	3172.9	1.2605	1.3684e-09	2.663e-08	up	sp|Q8GVE8|CAPP4_ARATH Phosphoenolpyruvate carboxylase 4 OS=Arabidopsis thaliana GN=PPC4 PE=2 SV=1//0
Cla000152	11048.6	3569.21	1.6302	4.6106e-07	5.623e-06	up	sp|Q949Q5|PSAO_ARATH Photosystem I subunit O OS=Arabidopsis thaliana GN=PSAO PE=1 SV=1//6.21964e-44
Cla000159	1071.01	552.952	0.95375	4.8622e-05	0.00037629	up	-//-
Cla000181	535.239	302.248	0.82445	0.0019075	0.0091398	up	sp|Q9SGD1|ZWIP3_ARATH Zinc finger protein WIP3 OS=Arabidopsis thaliana GN=WIP3 PE=2 SV=1//1.14283e-106
Cla000228	20830.2	16.5426	10.298	6.8693e-48	3.0421e-45	up	sp|P24465|C71A1_PERAE Cytochrome P450 71A1 OS=Persea americana GN=CYP71A1 PE=1 SV=2//1.42306e-151
Cla000235	2810.52	1828.49	0.62018	0.0038537	0.016562	up	sp|F4JKK0|SUD1_ARATH Probable E3 ubiquitin ligase SUD1 OS=Arabidopsis thaliana GN=SUD1 PE=1 SV=1//5.55138e-09
Cla000266	1808.92	913.101	0.98628	1.0299e-05	9.3038e-05	up	sp|Q5XET4|PP142_ARATH Pentatricopeptide repeat-containing protein At2g01860 OS=Arabidopsis thaliana GN=EMB975 PE=2 SV=1//4.18303e-154
Cla000304	5502.41	1963.72	1.4865	9.3222e-13	2.9394e-11	up	sp|Q689G6|PRR95_ORYSJ Two-component response regulator-like PRR95 OS=Oryza sativa subsp. japonica GN=PRR95 PE=2 SV=1//3.73561e-96
Cla000305	484.042	227.018	1.0923	0.00056688	0.0031849	up	sp|Q9SJ52|YLS9_ARATH Protein YLS9 OS=Arabidopsis thaliana GN=YLS9 PE=2 SV=1//1.82432e-10
Cla000306	565.719	293.435	0.94705	0.00042647	0.0024835	up	-//-
Cla000307	2542.46	1543.22	0.72028	0.00091853	0.0048541	up	sp|Q9LYC2|NPL41_ARATH NPL4-like protein 1 OS=Arabidopsis thaliana GN=At3g63000 PE=1 SV=1//0
Cla000308	486.616	268.999	0.85519	0.001955	0.009345	up	sp|Q9LYC2|NPL41_ARATH NPL4-like protein 1 OS=Arabidopsis thaliana GN=At3g63000 PE=1 SV=1//3.5459e-24
Cla000310	720.658	154.217	2.2244	2.042e-15	8.7135e-14	up	-//-
Cla000311	13612.6	5194.05	1.39	2.688e-11	6.9658e-10	up	-//-
Cla000312	1442.21	792.228	0.86429	0.00014728	0.0009963	up	sp|Q94JX9|NACA2_ARATH Nascent polypeptide-associated complex subunit alpha-like protein 2 OS=Arabidopsis thaliana GN=At3g49470 PE=2 SV=2//6.8208e-37
Cla000346	744.051	116.699	2.6726	8.8542e-21	6.5109e-19	up	sp|Q93V61|LCAT3_ARATH Phospholipase A(1) LCAT3 OS=Arabidopsis thaliana GN=LCAT3 PE=1 SV=1//1.38473e-33
Cla000347	39.2882	5.87303	2.7419	0.0012661	0.00643	up	-//-
Cla000348	665.298	151.839	2.1315	3.3885e-14	1.2367e-12	up	sp|Q93V61|LCAT3_ARATH Phospholipase A(1) LCAT3 OS=Arabidopsis thaliana GN=LCAT3 PE=1 SV=1//9.63208e-18
Cla000366	2301.01	1299.38	0.82445	0.00013769	0.00094037	up	sp|Q93YZ7|ILVH2_ARATH Acetolactate synthase small subunit 2, chloroplastic OS=Arabidopsis thaliana GN=At2g31810 PE=1 SV=1//1.08516e-39
Cla000376	11956.6	6082.57	0.97505	2.2346e-06	2.3852e-05	up	-//-
Cla000394	1169.11	78.8851	3.8895	1.9964e-42	6.028e-40	up	sp|P49132|TPT_FLATR Triose phosphate/phosphate translocator, chloroplastic OS=Flaveria trinervia GN=TPT PE=2 SV=1//8.24869e-148
Cla000396	634.962	227.158	1.483	5.8343e-08	8.6251e-07	up	sp|Q9C5W6|14312_ARATH 14-3-3-like protein GF14 iota OS=Arabidopsis thaliana GN=GRF12 PE=2 SV=1//5.86654e-109
Cla000424	738.471	323.44	1.191	4.2003e-06	4.1789e-05	up	sp|Q4LDF9|OEP37_PEA Outer envelope pore protein 37, chloroplastic OS=Pisum sativum GN=OEP37 PE=1 SV=1//6.54764e-151
Cla000429	1500.38	809.426	0.89036	0.00010341	0.00072818	up	sp|Q8LAC4|URH2_ARATH Probable uridine nucleosidase 2 OS=Arabidopsis thaliana GN=URH2 PE=2 SV=1//2.49495e-177
Cla000465	1651.66	545.473	1.5983	7.8046e-12	2.1692e-10	up	sp|Q02764|RK24_TOBAC 50S ribosomal protein L24, chloroplastic OS=Nicotiana tabacum GN=RPL24 PE=1 SV=1//3.50946e-83
Cla000490	3904.66	884.292	2.1426	5.8559e-08	8.6506e-07	up	-//-
Cla000513	1745.89	691.804	1.3355	5.4682e-09	9.6434e-08	up	sp|P22686|CB2_CHLMO Chlorophyll a-b binding protein of LHCII type I, chloroplastic OS=Chlamydomonas moewusii PE=2 SV=1//5.5702e-61
Cla000518	635.512	225.074	1.4975	8.2151e-06	7.6144e-05	up	-//-
Cla000523	2779.08	1688.54	0.71883	0.00087736	0.0046699	up	sp|Q8GYX8|DNJ10_ARATH Chaperone protein dnaJ 10 OS=Arabidopsis thaliana GN=ATJ10 PE=2 SV=2//6.12277e-86
Cla000525	931.11	598.744	0.63701	0.0071658	0.027896	up	sp|Q8GYX8|DNJ10_ARATH Chaperone protein dnaJ 10 OS=Arabidopsis thaliana GN=ATJ10 PE=2 SV=2//3.23639e-10
Cla000539	1085.32	667.432	0.70143	0.0026562	0.012154	up	sp|F4ILY9|ANTL1_ARATH Amino acid transporter ANTL1 OS=Arabidopsis thaliana GN=At2g42005 PE=2 SV=1//0
Cla000543	325.889	182.433	0.83701	0.0054219	0.022042	up	sp|Q9LSS5|ICR3_ARATH Interactor of constitutive active ROPs 3 OS=Arabidopsis thaliana GN=ICR3 PE=1 SV=1//3.4043e-62
Cla000554	120.281	25.5577	2.2346	4.6187e-06	4.552e-05	up	-//-
Cla000555	5045.12	2773.39	0.86324	5.1081e-05	0.00039242	up	sp|Q7DLR9|PSB4_ARATH Proteasome subunit beta type-4 OS=Arabidopsis thaliana GN=PBG1 PE=1 SV=2//6.30436e-148
Cla000562	3673.82	1442.08	1.3491	4.9145e-10	1.0309e-08	up	sp|Q6NQE2|FQRL1_ARATH Probable NAD(P)H dehydrogenase (quinone) FQR1-like 1 OS=Arabidopsis thaliana GN=At4g27270 PE=2 SV=1//1.08259e-109
Cla000612	16232.3	10026.7	0.69501	0.00071637	0.0038888	up	sp|P37830|G6PD_SOLTU Glucose-6-phosphate 1-dehydrogenase, cytoplasmic isoform OS=Solanum tuberosum GN=G6PDH PE=2 SV=1//0
Cla000633	17766.4	6701.8	1.4065	2.7247e-07	3.4896e-06	up	sp|P0CZ23|ACOX3_ARATH Acyl-coenzyme A oxidase 3, peroxisomal OS=Arabidopsis thaliana GN=ACX3 PE=1 SV=1//0
Cla000655	1473.04	786.247	0.90574	7.1638e-05	0.00052913	up	sp|Q93VK5|LUT5_ARATH Protein LUTEIN DEFICIENT 5, chloroplastic OS=Arabidopsis thaliana GN=CYP97A3 PE=1 SV=1//0
Cla000664	48001.7	10712.4	2.1638	3.6894e-15	1.5222e-13	up	-//-
Cla000691	7252.31	4298.67	0.75455	0.0003716	0.0022013	up	sp|Q03489|AGL9_PETHY Agamous-like MADS-box protein AGL9 homolog OS=Petunia hybrida GN=FBP2 PE=1 SV=2//1.50402e-137
Cla000693	143.772	23.9463	2.5859	3.1728e-06	3.2676e-05	up	-//-
Cla000701	33285.8	20620.6	0.69082	0.00066511	0.0036433	up	sp|P47927|AP2_ARATH Floral homeotic protein APETALA 2 OS=Arabidopsis thaliana GN=AP2 PE=1 SV=1//1.10738e-107
Cla000704	6506.71	3114.65	1.0629	3.518e-07	4.4032e-06	up	sp|Q3EDL4|Y1154_ARATH Probable serine/threonine-protein kinase At1g01540 OS=Arabidopsis thaliana GN=At1g01540 PE=1 SV=2//0
Cla000712	3712.33	2269.26	0.71011	0.00060695	0.003371	up	-//-
Cla000713	2477.39	682.405	1.8601	3.2471e-07	4.0889e-06	up	sp|P22335|HSF24_SOLPE Heat shock factor protein HSF24 OS=Solanum peruvianum GN=HSF24 PE=2 SV=1//3.69713e-98
Cla000735	708.34	248.16	1.5132	1.4881e-08	2.4288e-07	up	sp|Q9FFN2|GLYT3_ARATH Probable glycosyltransferase At5g03795 OS=Arabidopsis thaliana GN=At5g03795 PE=3 SV=2//3.75802e-33
Cla000771	1016.02	643.213	0.65956	0.0050271	0.020711	up	sp|Q9ZR07|FRDA_ARATH Frataxin, mitochondrial OS=Arabidopsis thaliana GN=FH PE=1 SV=2//1.80723e-57
Cla000786	1008.93	676.035	0.57766	0.01357	0.046793	up	-//-
Cla000803	585.058	45.774	3.676	7.4882e-30	1.0659e-27	up	sp|Q9CA56|PP121_ARATH Pentatricopeptide repeat-containing protein At1g74600, chloroplastic OS=Arabidopsis thaliana GN=PCMP-E69 PE=3 SV=1//2.07268e-12
Cla000805	1144.47	550.812	1.055	1.408e-05	0.00012344	up	sp|F4IDI6|BRG2_ARATH Probable BOI-related E3 ubiquitin-protein ligase 2 OS=Arabidopsis thaliana GN=BRG2 PE=1 SV=1//8.92757e-25
Cla000809	1194.59	512.752	1.2202	4.2428e-07	5.2192e-06	up	sp|Q9SGY2|ACLA1_ARATH ATP-citrate synthase alpha chain protein 1 OS=Arabidopsis thaliana GN=ACLA-1 PE=1 SV=1//0
Cla000840	7620.42	4872.65	0.64516	0.001654	0.0080828	up	sp|Q8LB02|SDHB2_ARATH Succinate dehydrogenase [ubiquinone] iron-sulfur subunit 2, mitochondrial OS=Arabidopsis thaliana GN=SDH2-2 PE=1 SV=2//1.45587e-120
Cla000848	1609.5	912.048	0.81943	0.00028311	0.0017437	up	sp|O29470|Y788_ARCFU Uncharacterized transporter AF_0788 OS=Archaeoglobus fulgidus (strain ATCC 49558 / VC-16 / DSM 4304 / JCM 9628 / NBRC 100126) GN=AF_0788 PE=3 SV=1//8.0724e-09
Cla000850	1922.23	792.5	1.2783	2.0714e-08	3.313e-07	up	sp|Q9S713|STT7_ARATH Serine/threonine-protein kinase STN7, chloroplastic OS=Arabidopsis thaliana GN=STN7 PE=1 SV=1//0
Cla000858	12689.9	6799.47	0.90019	1.4972e-05	0.00013037	up	sp|Q02028|HSP7S_PEA Stromal 70 kDa heat shock-related protein, chloroplastic OS=Pisum sativum GN=HSP70 PE=2 SV=1//0
Cla000861	872.817	481.918	0.85689	0.0095765	0.035263	up	sp|Q0P5L0|RBM42_BOVIN RNA-binding protein 42 OS=Bos taurus GN=RBM42 PE=2 SV=1//1.19185e-49
Cla000871	3423.56	1677.09	1.0295	1.6375e-06	1.8029e-05	up	sp|Q6YU51|DXS2_ORYSJ Probable 1-deoxy-D-xylulose-5-phosphate synthase 2, chloroplastic OS=Oryza sativa subsp. japonica GN=Os07g0190000 PE=2 SV=1//0
Cla000874	3598.7	1148.6	1.6476	1.0533e-13	3.6826e-12	up	sp|Q9LF37|CLPB3_ARATH Chaperone protein ClpB3, chloroplastic OS=Arabidopsis thaliana GN=CLPB3 PE=2 SV=1//0
Cla000876	5377.3	3674.52	0.54933	0.0087632	0.032783	up	sp|Q9LJU7|PPA18_ARATH Purple acid phosphatase 18 OS=Arabidopsis thaliana GN=PAP18 PE=2 SV=1//0
Cla000878	782.419	387.464	1.0139	5.9314e-05	0.00044773	up	sp|Q9LJU6|FAX6_ARATH Protein FATTY ACID EXPORT 6 OS=Arabidopsis thaliana GN=FAX6 PE=3 SV=1//3.89602e-29
Cla000885	100.35	2.90354	5.1111	6.625e-05	0.00049391	up	sp|Q8W3Z1|BAMS_BETPL Beta-amyrin synthase OS=Betula platyphylla GN=OSCBPY PE=1 SV=1//0
Cla000905	2267.04	1002.33	1.1775	1.3652e-07	1.8673e-06	up	sp|Q9LIG0|Y3136_ARATH Clavaminate synthase-like protein At3g21360 OS=Arabidopsis thaliana GN=At3g21360 PE=1 SV=1//9.73341e-180
Cla000910	1070.73	571.559	0.90563	0.00015216	0.0010233	up	sp|Q9LI74|CHUP1_ARATH Protein CHUP1, chloroplastic OS=Arabidopsis thaliana GN=CHUP1 PE=1 SV=1//2.1091e-47
Cla000921	287.947	103.406	1.4775	5.7681e-06	5.553e-05	up	-//-
Cla000978	7905.94	4590.04	0.78443	0.00014371	0.00097544	up	sp|O49627|ISU1_ARATH Iron-sulfur cluster assembly protein 1 OS=Arabidopsis thaliana GN=ISU1 PE=2 SV=1//1.03924e-77
Cla000979	26932.8	7772.51	1.7929	8.481e-18	4.6559e-16	up	sp|Q9M1P7|BOR2_ARATH Probable boron transporter 2 OS=Arabidopsis thaliana GN=BOR2 PE=2 SV=1//0
Cla000980	2715.22	1169.05	1.2157	2.3871e-08	3.7694e-07	up	sp|P52178|TPT2_BRAOB Triose phosphate/phosphate translocator, non-green plastid, chloroplastic OS=Brassica oleracea var. botrytis GN=NGTPT PE=2 SV=1//6.326e-96
Cla000983	698.932	443.929	0.65482	0.0096178	0.035356	up	-//-
Cla001020	412.466	207.772	0.98927	0.00058897	0.0032853	up	sp|O49841|RAC2A_ARATH Ras-related protein RABC2a OS=Arabidopsis thaliana GN=RABC2A PE=1 SV=1//2.12956e-119
Cla001060	977.308	445.216	1.1343	5.2076e-06	5.0821e-05	up	sp|P42749|UBC5_ARATH Ubiquitin-conjugating enzyme E2 5 OS=Arabidopsis thaliana GN=UBC5 PE=2 SV=2//9.6307e-77
Cla001075	946.752	514.097	0.88095	0.0002799	0.0017269	up	sp|Q9FFF4|ILVH1_ARATH Acetolactate synthase small subunit 1, chloroplastic OS=Arabidopsis thaliana GN=VAT1 PE=1 SV=1//2.6464e-36
Cla001090	890.885	575.868	0.6295	0.0075909	0.0292	up	sp|Q3HVN1|AGUB_SOLTU N-carbamoylputrescine amidase OS=Solanum tuberosum GN=CPA PE=2 SV=1//1.02149e-40
Cla001104	883.512	389.314	1.1823	0.00016036	0.0010688	up	-//-
Cla001115	1212.24	642.394	0.91615	9.2742e-05	0.00066195	up	sp|Q6AWX0|XYLL2_ARATH D-xylose-proton symporter-like 2 OS=Arabidopsis thaliana GN=At5g17010 PE=1 SV=1//1.71377e-86
Cla001141	30.4	2.79466	3.4433	0.0014081	0.007031	up	-//-
Cla001148	749.854	360.966	1.0547	4.7297e-05	0.00036703	up	sp|P54873|HMCS_ARATH Hydroxymethylglutaryl-CoA synthase OS=Arabidopsis thaliana GN=HMGS PE=1 SV=2//0
Cla001155	3794.9	1240	1.6137	1.019e-13	3.5688e-12	up	sp|Q8GYC7|PGL1B_ARATH PGR5-like protein 1B, chloroplastic OS=Arabidopsis thaliana GN=PGRL1B PE=1 SV=1//1.04089e-157
Cla001157	837.774	462.877	0.85593	0.00046908	0.0026985	up	sp|Q9LD47|CCS_ARATH Copper chaperone for superoxide dismutase, chloroplastic/cytosolic OS=Arabidopsis thaliana GN=CCS PE=1 SV=1//3.29427e-40
Cla001158	1341.25	718.112	0.9013	0.00011091	0.00077363	up	sp|Q7XTY9|CCS_ORYSJ Copper chaperone for superoxide dismutase, chloroplastic OS=Oryza sativa subsp. japonica GN=CCS PE=2 SV=1//5.41317e-55
Cla001165	986.156	605.023	0.70483	0.0027209	0.012411	up	sp|Q8VYY4|BASS6_ARATH Probable sodium/metabolite cotransporter BASS6, chloroplastic OS=Arabidopsis thaliana GN=BASS6 PE=2 SV=1//2.76252e-178
Cla001166	124.157	39.3361	1.6582	0.000293	0.0017955	up	sp|Q55720|YC49L_SYNY3 Ycf49-like protein OS=Synechocystis sp. (strain PCC 6803 / Kazusa) GN=sll0608 PE=3 SV=1//6.27393e-24
Cla001181	4273.1	2776.82	0.62185	0.0029806	0.013417	up	sp|Q9T070|COX6A_ARATH Cytochrome c oxidase subunit 6a, mitochondrial OS=Arabidopsis thaliana GN=COX6A PE=2 SV=1//6.28759e-33
Cla001189	3156.46	772.341	2.031	5.1139e-19	3.1947e-17	up	sp|Q949R4|DIOXL_ARATH Extradiol ring-cleavage dioxygenase OS=Arabidopsis thaliana GN=LIGB PE=2 SV=1//1.92398e-126
Cla001207	2324.57	1422.44	0.7086	0.0011493	0.0059015	up	sp|Q99JW2|ACY1_MOUSE Aminoacylase-1 OS=Mus musculus GN=Acy1 PE=1 SV=1//6.00151e-120
Cla001216	1160.92	761.26	0.6088	0.0088274	0.032946	up	sp|Q9V3R6|ADAT1_DROME tRNA-specific adenosine deaminase 1 OS=Drosophila melanogaster GN=adat PE=1 SV=1//7.08996e-38
Cla001222	3215.4	1997.42	0.68686	0.0013588	0.0068261	up	sp|Q8GWP5|RIBD_ARATH Riboflavin biosynthesis protein PYRD, chloroplastic OS=Arabidopsis thaliana GN=PYRD PE=1 SV=1//1.86778e-127
Cla001246	47.4607	1.64213	4.8531	0.0003147	0.001905	up	sp|P11670|PRB1_TOBAC Basic form of pathogenesis-related protein 1 OS=Nicotiana tabacum PE=3 SV=1//3.19311e-62
Cla001251	3213.79	940.114	1.7734	1.041e-15	4.6098e-14	up	sp|O48651|ERG1_PANGI Squalene monooxygenase OS=Panax ginseng PE=2 SV=1//0
Cla001259	3925.56	1649.46	1.2509	1.0295e-08	1.7342e-07	up	-//-
Cla001268	70.0311	0.608949	6.8455	6.4496e-12	1.8257e-10	up	sp|P27879|HSP11_MEDSA 18.1 kDa class I heat shock protein (Fragment) OS=Medicago sativa GN=HSP18.1 PE=2 SV=1//3.35386e-42
Cla001317	2471.34	1128.31	1.1311	3.1256e-07	3.9547e-06	up	sp|Q9SRY4|LPA1_ARATH Protein LOW PSII ACCUMULATION 1, chloroplastic OS=Arabidopsis thaliana GN=LPA1 PE=1 SV=1//0
Cla001358	3636.44	2131.7	0.77052	0.0002808	0.0017314	up	sp|Q53FA7|QORX_HUMAN Quinone oxidoreductase PIG3 OS=Homo sapiens GN=TP53I3 PE=1 SV=2//6.53386e-78
Cla001378	1990.91	1197.29	0.73366	0.00088774	0.0047201	up	-//-
Cla001379	9943.76	6303.97	0.65753	0.0012672	0.006434	up	sp|Q9XFM6|MSBP1_ARATH Membrane steroid-binding protein 1 OS=Arabidopsis thaliana GN=MSBP1 PE=1 SV=2//2.34296e-79
Cla001411	420.6	105.903	1.9897	1.5693e-10	3.5741e-09	up	sp|O81263|KITH_ORYSJ Thymidine kinase OS=Oryza sativa subsp. japonica GN=TK PE=2 SV=2//2.26518e-99
Cla001414	899.046	497.064	0.85496	0.00046378	0.0026704	up	-//-
Cla001454	1149.62	590.82	0.96036	5.0952e-05	0.00039158	up	sp|B9HBA8|ACCC1_POPTR Biotin carboxylase 1, chloroplastic OS=Populus trichocarpa GN=POPTRDRAFT_831870 PE=2 SV=1//1.24399e-126
Cla001455	1963.31	821.007	1.2578	2.6151e-08	4.1034e-07	up	sp|B9HBA8|ACCC1_POPTR Biotin carboxylase 1, chloroplastic OS=Populus trichocarpa GN=POPTRDRAFT_831870 PE=2 SV=1//0
Cla001456	547.81	269.485	1.0235	0.00012362	0.00085358	up	sp|Q5ZJ08|SYYC_CHICK Tyrosine--tRNA ligase, cytoplasmic OS=Gallus gallus GN=YARS PE=2 SV=1//2.33961e-15
Cla001457	459.642	179.126	1.3595	2.9445e-06	3.0593e-05	up	sp|Q29465|SYYC_BOVIN Tyrosine--tRNA ligase, cytoplasmic OS=Bos taurus GN=YARS PE=2 SV=4//6.67646e-12
Cla001461	670.576	357.873	0.90595	0.00043409	0.0025235	up	-//-
Cla001469	8377.73	3664.23	1.1931	1.0734e-08	1.802e-07	up	sp|P53536|PHSL_VICFA Alpha-1,4 glucan phosphorylase L isozyme, chloroplastic/amyloplastic OS=Vicia faba GN=PHO1 PE=2 SV=2//3.10823e-141
Cla001480	6999.18	3225.02	1.1179	9.4152e-08	1.325e-06	up	-//-
Cla001481	61.0848	11.7232	2.3814	0.00044943	0.002598	up	sp|Q9LYU7|CRN_ARATH Inactive leucine-rich repeat receptor-like protein kinase CORYNE OS=Arabidopsis thaliana GN=CRN PE=1 SV=1//2.79454e-103
Cla001489	1020.09	424.312	1.2655	2.0291e-07	2.6796e-06	up	-//-
Cla001502	2004.64	841.6	1.2521	2.6435e-08	4.1448e-07	up	sp|Q9ASS6|PNSL5_ARATH Photosynthetic NDH subunit of lumenal location 5, chloroplastic OS=Arabidopsis thaliana GN=PNSL5 PE=1 SV=1//9.34071e-100
Cla001504	786.977	353.382	1.1551	5.8858e-06	5.6499e-05	up	sp|Q8GUH1|PUB33_ARATH U-box domain-containing protein 33 OS=Arabidopsis thaliana GN=PUB33 PE=2 SV=2//9.41961e-11
Cla001514	5358.22	3084.3	0.79681	0.0055947	0.022638	up	sp|Q9C509|SGPL_ARATH Sphingosine-1-phosphate lyase OS=Arabidopsis thaliana GN=DPL1 PE=1 SV=1//5.33616e-97
Cla001518	219.179	120.201	0.86666	0.014346	0.049028	up	sp|Q84WJ2|PRI2_ARATH Probable DNA primase large subunit OS=Arabidopsis thaliana GN=At1g67320 PE=2 SV=2//0
Cla001571	436.166	265.513	0.7161	0.0088944	0.033149	up	-//-
Cla001593	5228.25	3308.98	0.65994	0.0017191	0.0083413	up	sp|Q9LVE4|CSCL4_ARATH CSC1-like protein At3g21620 OS=Arabidopsis thaliana GN=At3g21620 PE=2 SV=1//0
Cla001621	11588.4	183.61	5.9799	2.8273e-115	1.8781e-111	up	sp|P09042|PR1C_TOBAC Pathogenesis-related protein 1C OS=Nicotiana tabacum PE=2 SV=3//2.24252e-68
Cla001628	1959.02	834.825	1.2306	0.0099645	0.036362	up	sp|P11670|PRB1_TOBAC Basic form of pathogenesis-related protein 1 OS=Nicotiana tabacum PE=3 SV=1//5.86218e-63
Cla001657	1964.35	1249.7	0.65247	0.0030627	0.013709	up	sp|Q55B06|SPXS1_DICDI SPX and EXS domain-containing protein 1 OS=Dictyostelium discoideum GN=DDB_G0271664 PE=3 SV=2//1.73533e-31
Cla001664	12259.9	6809.48	0.84833	3.2851e-05	0.00026601	up	sp|P48496|TPIC_SPIOL Triosephosphate isomerase, chloroplastic OS=Spinacia oleracea GN=TPIP1 PE=1 SV=1//3.03684e-135
Cla001683	658.497	429.852	0.61533	0.013081	0.045421	up	sp|Q5ZKV9|SYNDE_CHICK Syndetin OS=Gallus gallus GN=CCDC132 PE=2 SV=1//4.07776e-19
Cla001688	1918.52	751.791	1.3516	1.5716e-09	3.0255e-08	up	sp|Q67Y83|SCP51_ARATH Serine carboxypeptidase-like 51 OS=Arabidopsis thaliana GN=SCPL51 PE=2 SV=2//5.90707e-144
Cla001746	758.376	284.072	1.4167	2.5095e-08	3.9534e-07	up	sp|Q9FFR9|CHX18_ARATH Cation/H(+) antiporter 18 OS=Arabidopsis thaliana GN=CHX18 PE=2 SV=1//0
Cla001764	9900.88	5619.69	0.81707	0.0018996	0.0091109	up	sp|P27522|CB13_SOLLC Chlorophyll a-b binding protein 8, chloroplastic OS=Solanum lycopersicum GN=CAB8 PE=3 SV=1//1.78753e-142
Cla001775	775.981	305.494	1.3449	1.9994e-07	2.6422e-06	up	sp|Q9SZR0|CHMO_ARATH Choline monooxygenase, chloroplastic OS=Arabidopsis thaliana GN=At4g29890 PE=2 SV=2//0
Cla001777	19896.9	11902.2	0.74132	0.0013061	0.0066011	up	sp|Q54SW1|Y2179_DICDI Putative phosphatidylglycerol/phosphatidylinositol transfer protein DDB_G0282179 OS=Dictyostelium discoideum GN=DDB_G0282179 PE=3 SV=2//3.96262e-07
Cla001779	416.767	158.607	1.3938	2.3769e-06	2.5195e-05	up	sp|P83332|TLP1_PRUPE Thaumatin-like protein 1 OS=Prunus persica PE=2 SV=1//2.07173e-53
Cla001787	201.213	50.9271	1.9822	8.0421e-07	9.4217e-06	up	-//-
Cla001790	31745.8	8402.99	1.9176	1.6466e-10	3.7288e-09	up	sp|Q40459|PSBO_TOBAC Oxygen-evolving enhancer protein 1, chloroplastic OS=Nicotiana tabacum GN=PSBO PE=2 SV=1//0
Cla001793	1338.63	694.914	0.94585	4.1711e-05	0.00032867	up	sp|O23166|TR164_ARATH Thioredoxin-like protein HCF164, chloroplastic OS=Arabidopsis thaliana GN=HCF164 PE=2 SV=2//4.80417e-113
Cla001796	808.278	450.552	0.84316	0.00067006	0.0036644	up	-//-
Cla001798	741.502	470.594	0.65597	0.0085758	0.032251	up	sp|Q54LN2|VP13D_DICDI Putative vacuolar protein sorting-associated protein 13D OS=Dictyostelium discoideum GN=vps13D PE=3 SV=1//1.89436e-06
Cla001815	215.308	5.62205	5.2592	4.4612e-24	4.2948e-22	up	sp|Q6RYA0|SABP2_TOBAC Salicylic acid-binding protein 2 OS=Nicotiana tabacum GN=SABP2 PE=1 SV=1//7.64595e-120
Cla001822	5791.02	2775.89	1.0609	2.487e-07	3.2141e-06	up	sp|Q94DH3|PCL1_ORYSJ Transcription factor PCL1 OS=Oryza sativa subsp. japonica GN=PCL1 PE=2 SV=1//1.72153e-13
Cla001823	3506.4	1843.35	0.92766	1.3195e-05	0.00011625	up	sp|Q5RF82|MSTO1_PONPY Protein misato homolog 1 OS=Pongo pygmaeus GN=MSTO1 PE=2 SV=1//6.50799e-48
Cla001847	785.999	69.3265	3.503	4.0535e-29	5.6096e-27	up	sp|P22196|PER2_ARAHY Cationic peroxidase 2 OS=Arachis hypogaea GN=PNC2 PE=2 SV=1//5.1804e-140
Cla001856	490.733	50.5916	3.278	3.2374e-22	2.7222e-20	up	sp|Q6PS57|CKS1_ORYSJ Cyclin-dependent kinases regulatory subunit 1 OS=Oryza sativa subsp. japonica GN=CKS1 PE=2 SV=1//4.63157e-49
Cla001857	4726.97	2359.09	1.0027	2.4039e-06	2.5414e-05	up	sp|Q9FYC2|PAO_ARATH Pheophorbide a oxygenase, chloroplastic OS=Arabidopsis thaliana GN=PAO PE=1 SV=1//0
Cla001867	8872.35	3371.82	1.3958	4.3662e-11	1.0972e-09	up	-//-
Cla001895	877.502	215.814	2.0236	8.2312e-15	3.2353e-13	up	sp|Q9SY73|PTALR_ARATH NADPH-dependent pterin aldehyde reductase OS=Arabidopsis thaliana GN=At1g10310 PE=1 SV=1//2.09806e-80
Cla001896	2080.56	1141.63	0.86588	0.0016242	0.0079525	up	-//-
Cla001897	8225.79	4492.97	0.87248	0.00098464	0.0051542	up	-//-
Cla001898	3446.14	1577.44	1.1274	5.8553e-05	0.00044282	up	-//-
Cla001903	4107.97	1792.14	1.1967	2.4596e-08	3.8778e-07	up	sp|O23710|PSB7A_ARATH Proteasome subunit beta type-7-A OS=Arabidopsis thaliana GN=PBB1 PE=1 SV=2//0
Cla001917	1728.19	1103.88	0.64668	0.0029603	0.013341	up	-//-
Cla001938	2931.04	1672.1	0.80975	0.00016514	0.0010966	up	sp|O24496|GLO2C_ARATH Hydroxyacylglutathione hydrolase cytoplasmic OS=Arabidopsis thaliana GN=GLX2-2 PE=1 SV=2//1.95415e-82
Cla001944	779.252	404.714	0.94519	0.00016768	0.0011097	up	sp|Q9ZU32|NADC_ARATH Nicotinate-nucleotide pyrophosphorylase [carboxylating], chloroplastic OS=Arabidopsis thaliana GN=QPT PE=2 SV=2//1.12666e-47
Cla001945	1336.51	593.608	1.1709	6.1743e-07	7.3502e-06	up	sp|Q9ZU32|NADC_ARATH Nicotinate-nucleotide pyrophosphorylase [carboxylating], chloroplastic OS=Arabidopsis thaliana GN=QPT PE=2 SV=2//3.13386e-91
Cla001976	1764.6	1001.05	0.81782	0.00025188	0.0015789	up	-//-
Cla001988	43.3013	0	Inf	0.0028531	0.012913	up	sp|P48979|PGLR_PRUPE Polygalacturonase OS=Prunus persica PE=2 SV=1//1.77659e-158
Cla001989	38.9677	3.458	3.4943	0.00025236	0.0015804	up	-//-
Cla001994	135.22	8.34087	4.019	7.9089e-07	9.2711e-06	up	sp|Q9SA16|P2A09_ARATH Protein PHLOEM PROTEIN 2-LIKE A9 OS=Arabidopsis thaliana GN=PP2A9 PE=2 SV=1//1.83937e-34
Cla002001	11.5526	0	Inf	0.0069262	0.027106	up	sp|Q9SA16|P2A09_ARATH Protein PHLOEM PROTEIN 2-LIKE A9 OS=Arabidopsis thaliana GN=PP2A9 PE=2 SV=1//1.87111e-34
Cla002034	185.974	55.9609	1.7326	1.9125e-05	0.00016308	up	sp|Q9SKX1|IBH1_ARATH Transcription factor IBH1 OS=Arabidopsis thaliana GN=IBH1 PE=1 SV=1//5.04937e-15
Cla002091	8737.74	2698.26	1.6952	6.8379e-16	3.1111e-14	up	sp|Q9LBG2|LVR_LEIAQ Levodione reductase OS=Leifsonia aquatica GN=lvr PE=1 SV=1//1.78029e-18
Cla002098	6222.57	2533.14	1.2966	7.2905e-10	1.5009e-08	up	sp|Q6R3K6|YSL6_ARATH Probable metal-nicotianamine transporter YSL6 OS=Arabidopsis thaliana GN=YSL6 PE=2 SV=2//0
Cla002103	2513.08	1450.88	0.79253	0.00026438	0.0016459	up	sp|Q75HX5|TLP8_ORYSJ Tubby-like F-box protein 8 OS=Oryza sativa subsp. japonica GN=TULP8 PE=2 SV=1//0
Cla002157	2616.01	1782.74	0.55328	0.0095848	0.035273	up	sp|Q9LSD8|MUB4_ARATH Membrane-anchored ubiquitin-fold protein 4 OS=Arabidopsis thaliana GN=MUB4 PE=1 SV=1//8.82244e-55
Cla002166	10692.7	5241.18	1.0287	0.00098209	0.0051435	up	sp|Q9SGA2|GDPD1_ARATH Glycerophosphodiester phosphodiesterase GDPD1, chloroplastic OS=Arabidopsis thaliana GN=GDPD1 PE=1 SV=1//3.53686e-164
Cla002178	1964.98	711.521	1.4655	1.7262e-10	3.8958e-09	up	sp|P29450|TRXF_PEA Thioredoxin F-type, chloroplastic OS=Pisum sativum PE=2 SV=1//1.95655e-68
Cla002179	2209.71	1506.38	0.55278	0.0096094	0.035338	up	sp|O80800|ACPM2_ARATH Acyl carrier protein 2, mitochondrial OS=Arabidopsis thaliana GN=MTACP2 PE=1 SV=1//5.33121e-60
Cla002194	16340.7	8677.12	0.91318	0.00030079	0.0018337	up	sp|Q9C9W9|ADO3_ARATH Adagio protein 3 OS=Arabidopsis thaliana GN=ADO3 PE=1 SV=1//0
Cla002202	1543.55	801.681	0.94515	2.9093e-05	0.00023819	up	sp|Q55512|DHAS_SYNY3 Aspartate-semialdehyde dehydrogenase OS=Synechocystis sp. (strain PCC 6803 / Kazusa) GN=asd PE=3 SV=2//2.48758e-116
Cla002221	2029.65	1159.38	0.80787	0.00024502	0.0015432	up	sp|Q9C6S5|PHSB_ARATH Probable polyamine transporter At1g31830 OS=Arabidopsis thaliana GN=At1g31830 PE=2 SV=1//0
Cla002228	2055.15	1169.26	0.81365	0.007231	0.028085	up	sp|O22820|U74F1_ARATH UDP-glycosyltransferase 74F1 OS=Arabidopsis thaliana GN=UGT74F1 PE=1 SV=1//5.98528e-129
Cla002239	10032.4	2335.3	2.103	9.6727e-23	8.4916e-21	up	sp|O80860|FTSH2_ARATH ATP-dependent zinc metalloprotease FTSH 2, chloroplastic OS=Arabidopsis thaliana GN=FTSH2 PE=1 SV=1//0
Cla002242	3107.53	2111.7	0.55736	0.0092668	0.034285	up	sp|Q40194|RB11D_LOTJA Ras-related protein Rab11D OS=Lotus japonicus GN=RAB11D PE=2 SV=1//5.47089e-141
Cla002245	2140.95	94.5575	4.5009	1.8994e-62	1.4558e-59	up	sp|P39101|CAJ1_YEAST Protein CAJ1 OS=Saccharomyces cerevisiae (strain ATCC 204508 / S288c) GN=CAJ1 PE=1 SV=1//3.1503e-13
Cla002251	17.8269	0	Inf	0.00040864	0.0023916	up	sp|A7NY33|PER4_VITVI Peroxidase 4 OS=Vitis vinifera GN=GSVIVT00023967001 PE=1 SV=1//1.77489e-140
Cla002256	641.024	408.469	0.65015	0.010181	0.036954	up	-//-
Cla002262	18594.7	9167.3	1.0203	1.8725e-06	2.0358e-05	up	sp|Q96453|1433D_SOYBN 14-3-3-like protein D OS=Glycine max GN=GF14D PE=2 SV=1//5.62851e-126
Cla002286	1494.74	1001.7	0.57745	0.011954	0.042246	up	sp|Q8RXD3|AIP2_ARATH E3 ubiquitin-protein ligase AIP2 OS=Arabidopsis thaliana GN=AIP2 PE=1 SV=1//2.10388e-117
Cla002287	1055.07	651.708	0.69504	0.0036309	0.015765	up	-//-
Cla002291	1635.01	942.177	0.79523	0.00043476	0.0025259	up	sp|Q94A41|AMY3_ARATH Alpha-amylase 3, chloroplastic OS=Arabidopsis thaliana GN=AMY3 PE=2 SV=1//1.26285e-172
Cla002312	2482.03	1176.64	1.0768	8.853e-07	1.0267e-05	up	sp|Q8GVE8|CAPP4_ARATH Phosphoenolpyruvate carboxylase 4 OS=Arabidopsis thaliana GN=PPC4 PE=2 SV=1//0
Cla002318	3958.92	2665.23	0.57084	0.007003	0.027369	up	sp|Q9C658|DCP5_ARATH Protein decapping 5 OS=Arabidopsis thaliana GN=DCP5 PE=1 SV=1//1.82913e-86
Cla002319	362.033	143.083	1.3393	0.004392	0.018484	up	sp|Q9LIG0|Y3136_ARATH Clavaminate synthase-like protein At3g21360 OS=Arabidopsis thaliana GN=At3g21360 PE=1 SV=1//6.32333e-74
Cla002321	132.155	5.37197	4.6206	1.1658e-14	4.4935e-13	up	sp|Q29PU4|CLE12_ARATH CLAVATA3/ESR (CLE)-related protein 12 OS=Arabidopsis thaliana GN=CLE12 PE=2 SV=1//4.037e-10
Cla002349	3166.7	1180.21	1.4239	9.1919e-11	2.1911e-09	up	-//-
Cla002352	3324.19	1960.18	0.76202	0.00033542	0.002014	up	sp|Q9M9M9|NDUAC_ARATH Probable NADH dehydrogenase [ubiquinone] 1 alpha subcomplex subunit 12 OS=Arabidopsis thaliana GN=At3g03100 PE=1 SV=1//9.58386e-79
Cla002353	2162.71	1197.97	0.85225	0.0001112	0.00077536	up	sp|Q8LPQ6|AB28B_ARATH ABC transporter B family member 28 OS=Arabidopsis thaliana GN=ABCB28 PE=2 SV=1//0
Cla002354	856.549	414.997	1.0454	2.0295e-05	0.00017181	up	sp|Q1XDS2|YCF20_PYRYE Uncharacterized protein ycf20 OS=Pyropia yezoensis GN=ycf20 PE=3 SV=1//1.76993e-12
Cla002359	514.193	275.743	0.89899	0.00095257	0.0050047	up	sp|Q9SM59|PGMP_PEA Phosphoglucomutase, chloroplastic OS=Pisum sativum GN=PGMP PE=2 SV=1//8.88541e-74
Cla002361	916.54	369.405	1.311	2.1363e-07	2.8045e-06	up	sp|Q9SM59|PGMP_PEA Phosphoglucomutase, chloroplastic OS=Pisum sativum GN=PGMP PE=2 SV=1//1.8136e-139
Cla002367	1728.28	841.477	1.0383	3.7332e-06	3.7802e-05	up	sp|Q94KL7|SILD_FORIN Secoisolariciresinol dehydrogenase (Fragment) OS=Forsythia intermedia PE=1 SV=1//2.34594e-84
Cla002369	8338.16	5735.54	0.5398	0.0098838	0.036127	up	sp|P0CB26|Y1089_ARATH Uncharacterized protein At1g10890 OS=Arabidopsis thaliana GN=At1g10890 PE=4 SV=1//1.14043e-08
Cla002370	1448.22	757.159	0.93562	4.5544e-05	0.00035453	up	sp|Q6IDL4|P24D3_ARATH Transmembrane emp24 domain-containing protein p24delta3 OS=Arabidopsis thaliana GN=At1g09580 PE=1 SV=1//3.00755e-85
Cla002374	916.11	595.596	0.62119	0.0096565	0.035472	up	sp|Q5HZH2|TSR3_MOUSE Ribosome biogenesis protein TSR3 homolog OS=Mus musculus GN=Tsr3 PE=2 SV=1//2.19283e-45
Cla002376	1143.73	615.84	0.89312	0.00013865	0.00094529	up	sp|Q2R1U4|CK5P1_ORYSJ CDK5RAP1-like protein OS=Oryza sativa subsp. japonica GN=Os11g0592800 PE=2 SV=1//0
Cla002379	1365.91	603.029	1.1796	5.8041e-07	6.9343e-06	up	sp|F4ICF4|RBL10_ARATH RHOMBOID-like protein 10, chloroplastic OS=Arabidopsis thaliana GN=RBL10 PE=2 SV=1//4.13621e-78
Cla002393	3154.29	1684.06	0.90537	0.0072739	0.028223	up	sp|O64894|ACOX2_CUCMA Acyl-coenzyme A oxidase, peroxisomal OS=Cucurbita maxima GN=Acx PE=1 SV=1//0
Cla002414	648.672	338.083	0.94011	0.00026289	0.0016376	up	sp|P50433|GLYM_SOLTU Serine hydroxymethyltransferase, mitochondrial OS=Solanum tuberosum PE=2 SV=1//0
Cla002415	2213.8	1126.84	0.97424	1.0835e-05	9.7307e-05	up	sp|Q949P2|COPDA_ARATH Probable cytosolic oligopeptidase A OS=Arabidopsis thaliana GN=CYOP PE=1 SV=1//2.72219e-148
Cla002417	3973.59	1869.71	1.0876	3.2522e-07	4.0916e-06	up	sp|Q94AM1|OOPDA_ARATH Organellar oligopeptidase A, chloroplastic/mitochondrial OS=Arabidopsis thaliana GN=OOP PE=1 SV=1//7.79408e-180
Cla002419	1239.35	516.836	1.2618	0.010212	0.037028	up	sp|P46897|ATHB7_ARATH Homeobox-leucine zipper protein ATHB-7 OS=Arabidopsis thaliana GN=ATHB-7 PE=2 SV=2//8.56025e-27
Cla002430	11692.2	5466.58	1.0968	1.0912e-07	1.5153e-06	up	sp|P17783|MDHM_CITLA Malate dehydrogenase, mitochondrial OS=Citrullus lanatus GN=MMDH PE=1 SV=1//0
Cla002432	62.8391	6.40574	3.2942	5.57e-06	5.3988e-05	up	sp|Q1PFD9|TBL31_ARATH Protein trichome birefringence-like 31 OS=Arabidopsis thaliana GN=TBL31 PE=2 SV=1//0
Cla002442	8080.54	812.477	3.3141	1.6864e-47	7.3058e-45	up	sp|P73555|Y875_SYNY3 Uncharacterized membrane protein sll0875 OS=Synechocystis sp. (strain PCC 6803 / Kazusa) GN=sll0875 PE=3 SV=1//7.2643e-46
Cla002444	778.509	492.962	0.65924	0.0065792	0.025962	up	sp|Q9SYM2|BBX22_ARATH B-box zinc finger protein 22 OS=Arabidopsis thaliana GN=BBX22 PE=1 SV=2//8.40554e-97
Cla002447	1369.02	847.371	0.69208	0.0028208	0.012802	up	sp|Q9SYM5|RHM1_ARATH Trifunctional UDP-glucose 4,6-dehydratase/UDP-4-keto-6-deoxy-D-glucose 3,5-epimerase/UDP-4-keto-L-rhamnose-reductase RHM1 OS=Arabidopsis thaliana GN=RHM1 PE=1 SV=1//0
Cla002449	130.922	34.6906	1.9161	4.3668e-05	0.00034234	up	-//-
Cla002470	1436.07	248.456	2.5311	1.6521e-06	1.8158e-05	up	sp|Q40294|AOX1_MANIN Ubiquinol oxidase, mitochondrial OS=Mangifera indica GN=AOMI 1 PE=1 SV=2//4.1283e-173
Cla002515	2668.62	1786.83	0.57869	0.007367	0.028512	up	sp|Q84M24|AB1A_ARATH ABC transporter A family member 1 OS=Arabidopsis thaliana GN=ABCA1 PE=2 SV=2//2.84267e-14
Cla002517	1023.87	446.485	1.1974	8.6891e-07	1.0114e-05	up	sp|O22229|TRXB3_ARATH NADPH-dependent thioredoxin reductase 3 OS=Arabidopsis thaliana GN=NTRC PE=1 SV=2//0
Cla002563	2418.59	1601.8	0.59447	0.013785	0.047429	up	sp|Q500U8|TKPR1_ARATH Tetraketide alpha-pyrone reductase 1 OS=Arabidopsis thaliana GN=TKPR1 PE=1 SV=1//6.55642e-162
Cla002590	3350	1904.62	0.81465	0.00015536	0.0010397	up	sp|Q8W425|PSMD6_ORYSJ 26S proteasome non-ATPase regulatory subunit 6 OS=Oryza sativa subsp. japonica GN=RPN7 PE=2 SV=1//0
Cla002593	577.287	288.163	1.0024	0.00016033	0.0010688	up	sp|P47923|NDK2_PEA Nucleoside diphosphate kinase 2, chloroplastic OS=Pisum sativum GN=NDPK2 PE=1 SV=1//2.85657e-93
Cla002597	39301.6	21416.2	0.87589	1.7761e-05	0.00015256	up	sp|Q7FAH2|G3PC2_ORYSJ Glyceraldehyde-3-phosphate dehydrogenase 2, cytosolic OS=Oryza sativa subsp. japonica GN=GAPC2 PE=1 SV=1//0
Cla002598	2709.84	816.52	1.7306	1.4968e-14	5.7142e-13	up	sp|P26520|G3PC_PETHY Glyceraldehyde-3-phosphate dehydrogenase, cytosolic OS=Petunia hybrida GN=GAPC PE=2 SV=1//0
Cla002599	552.913	95.7038	2.5304	3.3076e-17	1.753e-15	up	-//-
Cla002604	934.403	390.937	1.2571	3.7181e-07	4.628e-06	up	sp|Q84P23|4CLL9_ARATH 4-coumarate--CoA ligase-like 9 OS=Arabidopsis thaliana GN=4CLL9 PE=1 SV=2//0
Cla002611	1284.21	527.04	1.2849	7.0096e-06	6.5891e-05	up	sp|Q9SZX3|ASSY_ARATH Argininosuccinate synthase, chloroplastic OS=Arabidopsis thaliana GN=At4g24830 PE=2 SV=3//0
Cla002612	2458.12	1310.21	0.90776	0.0027176	0.012399	up	sp|Q9M643|CCI1_ARATH Cycloeucalenol cycloisomerase OS=Arabidopsis thaliana GN=CPI1 PE=2 SV=1//5.1544e-146
Cla002619	1582.17	951.306	0.73393	0.0016457	0.0080519	up	sp|Q9FYF9|FB76_ARATH F-box protein At1g67340 OS=Arabidopsis thaliana GN=At1g67340 PE=1 SV=1//3.63065e-142
Cla002625	2639.84	1483.12	0.83181	0.00013354	0.00091573	up	sp|P38385|SC61G_ORYSJ Protein transport protein Sec61 subunit gamma OS=Oryza sativa subsp. japonica GN=Os02g0178400 PE=3 SV=1//3.82739e-32
Cla002628	138.519	61.4129	1.1735	0.0047748	0.019848	up	sp|Q6EU39|MADS6_ORYSJ MADS-box transcription factor 6 OS=Oryza sativa subsp. japonica GN=MADS6 PE=1 SV=1//9.29018e-47
Cla002642	347.62	109.87	1.6617	2.4849e-07	3.2134e-06	up	sp|Q9ZVM9|Y1461_ARATH Probable serine/threonine-protein kinase At1g54610 OS=Arabidopsis thaliana GN=At1g54610 PE=1 SV=1//0
Cla002647	1335.15	718.618	0.89371	0.0001165	0.00080895	up	sp|Q9FI46|CRL_ARATH Chromophore lyase CRL, chloroplastic OS=Arabidopsis thaliana GN=CRL PE=1 SV=1//7.45126e-120
Cla002655	2474.12	936.598	1.4014	2.9612e-10	6.4142e-09	up	sp|Q84JF5|PTA14_ARATH Protein PLASTID TRANSCRIPTIONALLY ACTIVE 14 OS=Arabidopsis thaliana GN=PTAC14 PE=1 SV=1//0
Cla002657	43.8566	4.52391	3.2772	0.0083951	0.031697	up	sp|O64759|CAAT5_ARATH Cationic amino acid transporter 5 OS=Arabidopsis thaliana GN=CAT5 PE=1 SV=1//0
Cla002683	8349.05	4801.38	0.79816	9.8654e-05	0.00069814	up	sp|Q9FHI1|MOB1A_ARATH MOB kinase activator-like 1A OS=Arabidopsis thaliana GN=MOB1A PE=2 SV=1//9.86445e-119
Cla002687	1465.22	901.858	0.70015	0.0020153	0.0095919	up	-//-
Cla002690	2442.5	873.995	1.4827	2.0622e-10	4.5663e-09	up	sp|Q9FVQ4|PLGG1_ARATH Plastidal glycolate/glycerate translocator 1, chloroplastic OS=Arabidopsis thaliana GN=PLGG1 PE=2 SV=1//0
Cla002709	587.609	312.444	0.91126	0.00066418	0.0036412	up	sp|Q9CQ29|RN151_MOUSE RING finger protein 151 OS=Mus musculus GN=Rnf151 PE=1 SV=1//8.79441e-09
Cla002719	904.267	590.913	0.6138	0.010195	0.036987	up	sp|Q6GLM5|DESI1_XENLA Desumoylating isopeptidase 1 OS=Xenopus laevis GN=desi1 PE=2 SV=1//1.17834e-41
Cla002726	1898.83	946.276	1.0048	6.6963e-06	6.3545e-05	up	sp|O24035|PANC_LOTJA Pantoate--beta-alanine ligase OS=Lotus japonicus GN=PANC PE=1 SV=3//1.26241e-161
Cla002732	502.161	259.737	0.9511	0.0004778	0.00274	up	sp|Q9FKB0|LSM5_ARATH Sm-like protein LSM5 OS=Arabidopsis thaliana GN=LSM5 PE=1 SV=1//1.19974e-30
Cla002739	2395.08	1449.36	0.72465	0.00087281	0.0046519	up	sp|Q9M8Z7|U80A2_ARATH Sterol 3-beta-glucosyltransferase UGT80A2 OS=Arabidopsis thaliana GN=UGT80A2 PE=1 SV=1//0
Cla002743	355.751	179.836	0.98419	0.00089927	0.0047661	up	-//-
Cla002747	8289.74	5068.25	0.70984	0.00057354	0.0032148	up	sp|Q9SZD4|PRS4A_ARATH 26S proteasome regulatory subunit 4 homolog A OS=Arabidopsis thaliana GN=RPT2A PE=1 SV=1//0
Cla002749	117.641	21.5446	2.449	1.4722e-05	0.00012855	up	sp|Q8GZM7|PIF1_ARATH Transcription factor PIF1 OS=Arabidopsis thaliana GN=PIF1 PE=1 SV=1//9.52286e-58
Cla002756	6299.05	1442.72	2.1263	8.7284e-16	3.9176e-14	up	sp|Q9M682|GMK2_ARATH Guanylate kinase 2 OS=Arabidopsis thaliana GN=GK-2 PE=2 SV=1//8.61726e-180
Cla002769	3187.9	1341.69	1.2486	5.3752e-09	9.4878e-08	up	sp|Q9FNB0|CHLH_ARATH Magnesium-chelatase subunit ChlH, chloroplastic OS=Arabidopsis thaliana GN=CHLH PE=1 SV=1//0
Cla002787	2038.71	993.686	1.0368	0.013935	0.047829	up	sp|P17569|NIA_CUCMA Nitrate reductase [NADH] OS=Cucurbita maxima PE=2 SV=1//5.67717e-129
Cla002788	10297.3	4617.05	1.1572	0.007873	0.030125	up	sp|P17569|NIA_CUCMA Nitrate reductase [NADH] OS=Cucurbita maxima PE=2 SV=1//0
Cla002793	2205.04	974.181	1.1785	1.5941e-07	2.1421e-06	up	sp|P42732|RR13_ARATH 30S ribosomal protein S13, chloroplastic OS=Arabidopsis thaliana GN=RPS13 PE=2 SV=1//1.35056e-82
Cla002801	6722.46	3522.42	0.93242	7.5488e-06	7.0475e-05	up	sp|Q94DM8|UFM1_ORYSJ Ubiquitin-fold modifier 1 OS=Oryza sativa subsp. japonica GN=Os01g0962400 PE=3 SV=1//1.37981e-55
Cla002811	1070.57	573.665	0.9001	0.0001377	0.00094037	up	sp|Q8W4H1|GAT26_ARATH GATA transcription factor 26 OS=Arabidopsis thaliana GN=GATA26 PE=2 SV=1//1.41839e-87
Cla002814	5861.65	3666.25	0.677	0.0012425	0.0063228	up	sp|Q9LD45|BI1_ARATH Bax inhibitor 1 OS=Arabidopsis thaliana GN=BI-1 PE=1 SV=1//3.92175e-115
Cla002815	10915.9	2336.4	2.2241	1.7441e-24	1.7378e-22	up	sp|Q9LD45|BI1_ARATH Bax inhibitor 1 OS=Arabidopsis thaliana GN=BI-1 PE=1 SV=1//2.26497e-112
Cla002818	192.542	72.4181	1.4107	0.00019989	0.0012929	up	sp|A6T923|HPXO_KLEP7 FAD-dependent urate hydroxylase OS=Klebsiella pneumoniae subsp. pneumoniae (strain ATCC 700721 / MGH 78578) GN=hpxO PE=1 SV=1//2.85262e-22
Cla002829	6090.04	1477.65	2.0431	2.3716e-21	1.8318e-19	up	-//-
Cla002860	2056.42	1297.31	0.66462	0.0028768	0.013006	up	sp|Q13049|TRI32_HUMAN E3 ubiquitin-protein ligase TRIM32 OS=Homo sapiens GN=TRIM32 PE=1 SV=2//3.13113e-06
Cla002884	537.239	249.047	1.1091	4.1989e-05	0.0003306	up	sp|Q54NP8|KIF4_DICDI Kinesin-related protein 4 OS=Dictyostelium discoideum GN=kif4 PE=2 SV=1//4.37905e-104
Cla002891	645.616	202.059	1.6759	1.2178e-09	2.3955e-08	up	sp|O80366|ARR9_ARATH Two-component response regulator ARR9 OS=Arabidopsis thaliana GN=ARR9 PE=1 SV=1//1.32905e-77
Cla002903	7957.13	4212.43	0.91759	0.0044407	0.018654	up	sp|P93263|METE_MESCR 5-methyltetrahydropteroyltriglutamate--homocysteine methyltransferase OS=Mesembryanthemum crystallinum GN=METE PE=2 SV=1//0
Cla002913	145.881	70.123	1.0568	0.0098381	0.03598	up	sp|Q7XA40|RGA3_SOLBU Putative disease resistance protein RGA3 OS=Solanum bulbocastanum GN=RGA3 PE=2 SV=2//1.15586e-58
Cla002959	246.927	98.3972	1.3274	0.00013634	0.0009327	up	sp|Q9SVQ0|ERF62_ARATH Ethylene-responsive transcription factor ERF062 OS=Arabidopsis thaliana GN=ERF062 PE=2 SV=1//4.00575e-43
Cla002982	592.33	342.405	0.7907	0.0027605	0.012562	up	sp|Q38867|CP19C_ARATH Peptidyl-prolyl cis-trans isomerase CYP19-3 OS=Arabidopsis thaliana GN=CYP19-3 PE=2 SV=2//3.547e-47
Cla002983	4288.98	1498.4	1.5172	1.4707e-12	4.5107e-11	up	sp|Q9LKR8|RAF1_ARATH Rubisco accumulation factor 1, chloroplastic OS=Arabidopsis thaliana GN=RAF1 PE=2 SV=1//2.37635e-127
Cla003070	4253.02	1706.03	1.3178	5.9321e-10	1.2353e-08	up	sp|Q949Y5|EGY1_ARATH Probable zinc metalloprotease EGY1, chloroplastic OS=Arabidopsis thaliana GN=EGY1 PE=2 SV=1//0
Cla003075	3944.06	1571.88	1.3272	9.5457e-10	1.9372e-08	up	sp|Q9ASS7|CAAT2_ARATH Cationic amino acid transporter 2, vacuolar OS=Arabidopsis thaliana GN=CAT2 PE=2 SV=1//0
Cla003082	90.5752	22.9363	1.9815	0.00023876	0.0015071	up	sp|Q4I8E9|PNS1_GIBZE Protein PNS1 OS=Gibberella zeae (strain PH-1 / ATCC MYA-4620 / FGSC 9075 / NRRL 31084) GN=PNS1 PE=3 SV=1//7.417e-11
Cla003083	621.237	289.71	1.1005	2.8497e-05	0.00023399	up	-//-
Cla003122	2186.72	1472.15	0.57084	0.0090703	0.033672	up	sp|Q42954|KPYC_TOBAC Pyruvate kinase, cytosolic isozyme OS=Nicotiana tabacum PE=2 SV=1//0
Cla003128	188.233	33.5932	2.4863	2.2823e-05	0.00019086	up	sp|Q9C5M0|DTC_ARATH Mitochondrial dicarboxylate/tricarboxylate transporter DTC OS=Arabidopsis thaliana GN=DTC PE=1 SV=1//1.86102e-123
Cla003129	11309.6	3133.78	1.8516	4.4852e-06	4.4336e-05	up	sp|O22349|TBA3_ELEIN Tubulin alpha-3 chain OS=Eleusine indica GN=TUBA3 PE=2 SV=1//0
Cla003132	431.5	151.512	1.5099	4.5834e-07	5.5932e-06	up	sp|Q9FFZ1|PPH_ARATH Pheophytinase, chloroplastic OS=Arabidopsis thaliana GN=PPH PE=1 SV=1//1.5971e-25
Cla003137	1036.9	529.354	0.96997	5.556e-05	0.00042357	up	sp|Q9FGC7|ZEP_ARATH Zeaxanthin epoxidase, chloroplastic OS=Arabidopsis thaliana GN=ZEP PE=1 SV=1//2.81997e-06
Cla003148	133.935	63.6636	1.073	0.010417	0.037654	up	sp|O49840|APK2B_ARATH Protein kinase 2B, chloroplastic OS=Arabidopsis thaliana GN=APK2B PE=2 SV=1//1.32766e-148
Cla003171	6052.17	4165.26	0.53905	0.0093031	0.034396	up	sp|Q84W89|RH37_ARATH DEAD-box ATP-dependent RNA helicase 37 OS=Arabidopsis thaliana GN=RH37 PE=2 SV=2//0
Cla003173	5021.53	2803	0.84115	5.812e-05	0.00044022	up	sp|Q9M015|Y5161_ARATH Uncharacterized protein At5g01610 OS=Arabidopsis thaliana GN=At5g01610 PE=1 SV=1//7.59729e-06
Cla003180	986.597	392.854	1.3285	0.0040777	0.017341	up	sp|Q9C523|DIR19_ARATH Dirigent protein 19 OS=Arabidopsis thaliana GN=DIR19 PE=2 SV=1//1.20231e-41
Cla003184	836.054	501.834	0.73639	0.0024305	0.011277	up	-//-
Cla003196	346.695	0.924301	8.5511	0.0052006	0.021294	up	sp|Q42517|PERN_ARMRU Peroxidase N OS=Armoracia rusticana GN=HRPN PE=2 SV=1//2.60466e-141
Cla003203	924.752	538.823	0.77926	0.0014281	0.0071097	up	sp|Q9SLA8|FABI_ARATH Enoyl-[acyl-carrier-protein] reductase [NADH], chloroplastic OS=Arabidopsis thaliana GN=MOD1 PE=1 SV=1//6.79343e-160
Cla003221	2485.4	1435.4	0.79202	0.00030647	0.0018631	up	-//-
Cla003237	2065.15	1215.71	0.76444	0.00053197	0.0030125	up	-//-
Cla003262	645.978	240.159	1.4275	1.0755e-07	1.4967e-06	up	sp|Q8L633|RNZC_ARATH Ribonuclease Z, chloroplastic OS=Arabidopsis thaliana GN=CPZ PE=2 SV=1//5.77512e-173
Cla003284	1332.24	694.602	0.93959	5.7123e-05	0.00043349	up	sp|Q9M4Y3|RR10_MESCR 30S ribosomal protein S10, chloroplastic OS=Mesembryanthemum crystallinum GN=RPS10 PE=2 SV=1//1.23263e-81
Cla003291	357.609	190.863	0.90585	0.0020834	0.0098712	up	sp|Q9SNC6|PUB13_ARATH U-box domain-containing protein 13 OS=Arabidopsis thaliana GN=PUB13 PE=1 SV=1//3.8567e-08
Cla003318	12638.4	5622.83	1.1684	4.0023e-05	0.00031763	up	sp|Q8GYN5|RIN4_ARATH RPM1-interacting protein 4 OS=Arabidopsis thaliana GN=RIN4 PE=1 SV=1//4.33116e-08
Cla003319	100.656	34.5716	1.5418	0.0021437	0.010123	up	sp|Q8VZK9|CSLE1_ARATH Cellulose synthase-like protein E1 OS=Arabidopsis thaliana GN=CSLE1 PE=2 SV=1//0
Cla003320	19245.9	7416.66	1.3757	6.9284e-11	1.6962e-09	up	sp|Q651X6|CSLE6_ORYSJ Cellulose synthase-like protein E6 OS=Oryza sativa subsp. japonica GN=CSLE6 PE=2 SV=1//0
Cla003326	1927.89	1313.18	0.55396	0.013459	0.046491	up	sp|Q8W034|RNP1_ARATH Heterogeneous nuclear ribonucleoprotein 1 OS=Arabidopsis thaliana GN=RNP1 PE=1 SV=1//4.85788e-15
Cla003330	13885.7	1852.33	2.9062	9.0642e-06	8.3087e-05	up	sp|P49351|FPPS1_LUPAL Farnesyl pyrophosphate synthase 1 OS=Lupinus albus GN=FPS1 PE=2 SV=1//0
Cla003340	1586.34	604.371	1.3922	2.4074e-09	4.5003e-08	up	sp|Q84W65|SUFE1_ARATH SufE-like protein 1, chloroplastic/mitochondrial OS=Arabidopsis thaliana GN=SUFE1 PE=1 SV=2//8.13204e-121
Cla003347	467.314	26.8486	4.1215	6.6947e-30	9.6675e-28	up	sp|Q9ZVH0|FEZ_ARATH Protein FEZ OS=Arabidopsis thaliana GN=FEZ PE=2 SV=1//1.08823e-79
Cla003365	620.06	312.571	0.98822	0.0002098	0.0013469	up	sp|Q9LSD6|ARP2_ARATH Actin-related protein 2 OS=Arabidopsis thaliana GN=ARP2 PE=1 SV=1//0
Cla003370	279.924	21.5325	3.7004	0.0011442	0.0058766	up	sp|Q9FYA2|WRK75_ARATH Probable WRKY transcription factor 75 OS=Arabidopsis thaliana GN=WRKY75 PE=2 SV=1//3.29742e-50
Cla003375	982.878	465.066	1.0796	0.00020352	0.0013117	up	-//-
Cla003394	1741.05	1059.33	0.7168	0.0014912	0.007385	up	-//-
Cla003403	33681.4	5649.98	2.5756	4.0287e-25	4.3164e-23	up	sp|P93824|ACCH6_ARATH 1-aminocyclopropane-1-carboxylate oxidase homolog 6 OS=Arabidopsis thaliana GN=At1g04350 PE=2 SV=1//1.14461e-104
Cla003422	25261.7	10564.4	1.2577	1.112e-09	2.2181e-08	up	sp|Q9FGZ9|UBL5_ARATH Ubiquitin-like protein 5 OS=Arabidopsis thaliana GN=UBL5 PE=3 SV=1//3.12282e-47
Cla003456	1210.13	756.966	0.67686	0.003316	0.014639	up	sp|Q8L8T2|GRXC1_ARATH Glutaredoxin-C1 OS=Arabidopsis thaliana GN=GRXC1 PE=2 SV=2//1.58729e-50
Cla003457	1295.69	730.449	0.82686	0.0038217	0.016449	up	sp|Q02166|TRPD_ARATH Anthranilate phosphoribosyltransferase, chloroplastic OS=Arabidopsis thaliana GN=PAT1 PE=2 SV=1//2.88258e-180
Cla003468	648.023	332.558	0.96244	0.00019935	0.0012898	up	-//-
Cla003470	342.499	147.694	1.2135	0.0001052	0.00073916	up	sp|Q5R8J8|DNJB4_PONAB DnaJ homolog subfamily B member 4 OS=Pongo abelii GN=DNAJB4 PE=2 SV=1//9.0395e-33
Cla003471	205.403	84.023	1.2896	0.00038207	0.0022586	up	sp|Q681Y3|Y1099_ARATH Putative transferase At1g60990, chloroplastic OS=Arabidopsis thaliana GN=At1g60990 PE=1 SV=1//4.96934e-59
Cla003474	239.317	104.533	1.195	0.00051407	0.0029244	up	sp|Q681Y3|Y1099_ARATH Putative transferase At1g60990, chloroplastic OS=Arabidopsis thaliana GN=At1g60990 PE=1 SV=1//3.75025e-40
Cla003478	2101.22	886.446	1.2451	4.6512e-08	7.0272e-07	up	sp|Q9SU30|CPR30_ARATH F-box protein CPR30 OS=Arabidopsis thaliana GN=CPR30 PE=1 SV=2//7.66722e-23
Cla003508	542.028	273.171	0.98856	0.00032318	0.0019487	up	sp|Q9LK31|Y3272_ARATH Kelch repeat-containing protein At3g27220 OS=Arabidopsis thaliana GN=At3g27220 PE=2 SV=1//0
Cla003520	5051.99	2301.9	1.134	1.0081e-07	1.4108e-06	up	sp|Q9SGD6|AROD6_ARATH Arogenate dehydratase/prephenate dehydratase 6, chloroplastic OS=Arabidopsis thaliana GN=ADT6 PE=1 SV=1//0
Cla003533	77.8579	24.7194	1.6552	0.0029763	0.013407	up	-//-
Cla003534	469.832	207.667	1.1779	0.0039048	0.016738	up	sp|Q9FK81|Y5258_ARATH Uncharacterized protein At5g22580 OS=Arabidopsis thaliana GN=At5g22580 PE=1 SV=1//5.34172e-39
Cla003572	575.618	302.195	0.92963	0.00061537	0.0034102	up	sp|Q9FHM7|HIR4_ARATH Hypersensitive-induced response protein 4 OS=Arabidopsis thaliana GN=HIR4 PE=1 SV=1//2.00213e-168
Cla003578	877.399	475.383	0.88414	0.00029552	0.0018076	up	sp|P91924|ARF_DUGJA ADP-ribosylation factor OS=Dugesia japonica PE=2 SV=3//2.07941e-13
Cla003582	305.477	92.3864	1.7253	2.2557e-07	2.9476e-06	up	sp|B0BML1|GNTK_XENTR Probable gluconokinase OS=Xenopus tropicalis GN=idnk PE=2 SV=1//2.3164e-30
Cla003586	2035.26	709.005	1.5213	1.7054e-11	4.5194e-10	up	-//-
Cla003599	3477.23	1844.44	0.91476	1.9724e-05	0.00016769	up	sp|Q6GQ39|TM135_XENLA Transmembrane protein 135 OS=Xenopus laevis GN=tmem135 PE=2 SV=1//4.56667e-08
Cla003602	1482.69	780.9	0.92501	5.7031e-05	0.00043296	up	-//-
Cla003603	687.943	314.529	1.1291	1.1294e-05	0.00010115	up	-//-
Cla003604	1602.51	615.336	1.3809	2.6673e-09	4.9445e-08	up	-//-
Cla003622	225.201	64.0876	1.8131	1.1465e-06	1.3034e-05	up	sp|Q9FLS0|FB253_ARATH F-box protein At5g07610 OS=Arabidopsis thaliana GN=At5g07610 PE=2 SV=1//8.18156e-59
Cla003623	2091.51	1083.43	0.94894	2.0177e-05	0.00017088	up	sp|P27061|PPA1_SOLLC Acid phosphatase 1 OS=Solanum lycopersicum GN=APS1 PE=2 SV=1//3.52796e-96
Cla003637	1846.87	960.134	0.94377	2.8063e-05	0.00023081	up	-//-
Cla003659	1637.64	1091.17	0.58575	0.0086751	0.032538	up	sp|Q20390|PPT1_CAEEL Palmitoyl-protein thioesterase 1 OS=Caenorhabditis elegans GN=ppt-1 PE=2 SV=2//3.84906e-42
Cla003660	669.588	294.679	1.1841	5.8488e-06	5.6225e-05	up	sp|Q54CM0|PPT3_DICDI Palmitoyl-protein thioesterase 3 OS=Dictyostelium discoideum GN=ppt3 PE=3 SV=1//8.45689e-43
Cla003665	2073.11	1166.44	0.82969	0.00020486	0.001319	up	sp|O65202|ACOX1_ARATH Peroxisomal acyl-coenzyme A oxidase 1 OS=Arabidopsis thaliana GN=ACX1 PE=1 SV=1//0
Cla003666	425.887	17.7143	4.5875	4.4283e-17	2.3151e-15	up	sp|Q9FFN2|GLYT3_ARATH Probable glycosyltransferase At5g03795 OS=Arabidopsis thaliana GN=At5g03795 PE=3 SV=2//9.33232e-115
Cla003668	4352.98	2391.48	0.8641	4.1047e-05	0.00032447	up	sp|Q9ZW85|LEUD3_ARATH 3-isopropylmalate dehydratase small subunit 3 OS=Arabidopsis thaliana GN=At2g43090 PE=1 SV=1//3.37004e-95
Cla003674	2500.86	1098.53	1.1869	1.2002e-07	1.6575e-06	up	-//-
Cla003698	6660.59	3910.79	0.76819	0.00022556	0.0014356	up	-//-
Cla003701	1822.14	1212.28	0.58791	0.0080009	0.030503	up	sp|P53990|IST1_HUMAN IST1 homolog OS=Homo sapiens GN=IST1 PE=1 SV=1//2.98869e-18
Cla003734	2451.3	1573.05	0.63998	0.0033297	0.01469	up	sp|Q9D832|DNJB4_MOUSE DnaJ homolog subfamily B member 4 OS=Mus musculus GN=Dnajb4 PE=2 SV=1//7.06581e-79
Cla003741	26.1075	4.01305	2.7017	0.010778	0.038755	up	-//-
Cla003751	6642.74	1866.2	1.8317	1.1108e-17	6.0481e-16	up	sp|Q9FV46|ZDS_TARER Zeta-carotene desaturase, chloroplastic/chromoplastic OS=Tagetes erecta PE=2 SV=1//0
Cla003760	608.366	205.838	1.5634	1.1856e-08	1.9755e-07	up	-//-
Cla003763	1318.69	459.243	1.5218	2.0585e-10	4.5663e-09	up	-//-
Cla003774	3806.06	857.337	2.1504	9.2691e-11	2.2016e-09	up	sp|Q9SSS9|ATPD_ARATH ATP synthase subunit delta, chloroplastic OS=Arabidopsis thaliana GN=ATPD PE=1 SV=1//4.04667e-88
Cla003789	1788.59	223.65	2.9995	1.4946e-23	1.3853e-21	up	sp|Q70II3|EF110_ARATH Ethylene-responsive transcription factor ERF110 OS=Arabidopsis thaliana GN=ERF110 PE=2 SV=2//7.07456e-28
Cla003830	459.071	262.638	0.80564	0.0037676	0.016248	up	-//-
Cla003860	1997.1	1348.95	0.56607	0.0094012	0.034681	up	-//-
Cla003877	1389.24	941.049	0.56195	0.01368	0.047124	up	sp|A7SWD3|GID8_NEMVE Glucose-induced degradation protein 8 homolog OS=Nematostella vectensis GN=v1g247787 PE=3 SV=1//2.60876e-14
Cla003885	1961.32	1251.59	0.64806	0.003422	0.015014	up	sp|Q9ZSY2|DNJ15_ARATH Chaperone protein dnaJ 15 OS=Arabidopsis thaliana GN=ATJ15 PE=1 SV=1//0
Cla003894	318.269	181.245	0.81231	0.011847	0.041919	up	-//-
Cla003902	26897.5	6969.16	1.9484	1.9468e-20	1.3709e-18	up	sp|Q9ZU52|ALFC3_ARATH Probable fructose-bisphosphate aldolase 3, chloroplastic OS=Arabidopsis thaliana GN=FBA3 PE=1 SV=1//0
Cla003910	987.626	519.255	0.92752	0.0025521	0.011767	up	-//-
Cla003918	1935.31	138.798	3.8015	5.5078e-48	2.4945e-45	up	-//-
Cla003928	461.769	104.491	2.1438	2.2191e-12	6.66e-11	up	-//-
Cla003935	3505.75	2029.1	0.78888	0.00018808	0.0012272	up	sp|O22161|ADLO1_ARATH Protein ARABIDILLO 1 OS=Arabidopsis thaliana GN=FBX5 PE=1 SV=1//1.04156e-06
Cla003938	7328.91	3310.26	1.1467	4.0963e-08	6.2361e-07	up	sp|Q9ZSQ4|PGMC_POPTN Phosphoglucomutase, cytoplasmic OS=Populus tremula GN=PGM1 PE=2 SV=1//0
Cla003943	2252.7	1297.76	0.79563	0.00029115	0.0017875	up	sp|Q9ZU90|SKI28_ARATH F-box protein SKIP28 OS=Arabidopsis thaliana GN=SKIP28 PE=1 SV=1//7.87522e-64
Cla003947	1483.49	952.098	0.63981	0.004179	0.0177	up	sp|Q9ZU93|PUX2_ARATH Plant UBX domain-containing protein 2 OS=Arabidopsis thaliana GN=PUX2 PE=1 SV=2//1.21708e-178
Cla003959	214.708	76.7776	1.4836	0.00051639	0.0029343	up	sp|Q8LF21|DRP1C_ARATH Dynamin-related protein 1C OS=Arabidopsis thaliana GN=DRP1C PE=1 SV=2//0
Cla003961	715.621	220.307	1.6997	1.264e-08	2.0909e-07	up	sp|Q8L612|MACP1_ARATH MACPF domain-containing protein At1g14780 OS=Arabidopsis thaliana GN=At1g14780 PE=2 SV=1//1.51284e-163
Cla003962	243.064	90.9832	1.4177	0.0005719	0.0032077	up	sp|Q8L612|MACP1_ARATH MACPF domain-containing protein At1g14780 OS=Arabidopsis thaliana GN=At1g14780 PE=2 SV=1//1.55368e-61
Cla003977	7745	18.9882	8.672	1.9002e-24	1.8839e-22	up	sp|Q39547|CUCM1_CUCME Cucumisin OS=Cucumis melo PE=1 SV=1//0
Cla003979	1488.58	3.95817	8.5549	5.8861e-30	8.5619e-28	up	sp|Q39547|CUCM1_CUCME Cucumisin OS=Cucumis melo PE=1 SV=1//2.42962e-18
Cla003985	5007.03	1750.31	1.5163	1.932e-12	5.8424e-11	up	sp|Q9FN03|UVR8_ARATH Ultraviolet-B receptor UVR8 OS=Arabidopsis thaliana GN=UVR8 PE=1 SV=1//4.47024e-10
Cla003989	1123.33	749.021	0.5847	0.013372	0.046263	up	sp|Q9LHT0|TRNHF_ARATH Tropinone reductase homolog At5g06060 OS=Arabidopsis thaliana GN=At5g06060 PE=2 SV=1//8.66521e-139
Cla003994	58.5334	0	Inf	1.1025e-05	9.8881e-05	up	sp|Q9LHS8|LBD33_ARATH LOB domain-containing protein 33 OS=Arabidopsis thaliana GN=LBD33 PE=2 SV=1//2.14214e-56
Cla003995	495.994	101.087	2.2947	7.6341e-13	2.4419e-11	up	sp|O98997|RCA_VIGRR Ribulose bisphosphate carboxylase/oxygenase activase, chloroplastic OS=Vigna radiata var. radiata GN=RCA PE=2 SV=2//0
Cla003999	3605.76	2446.09	0.55983	0.0079773	0.030437	up	sp|P0CH30|RING1_GOSHI E3 ubiquitin-protein ligase RING1 OS=Gossypium hirsutum GN=RING1 PE=1 SV=1//1.06029e-28
Cla004001	56.3544	1.95748	4.8475	6.9051e-08	9.9883e-07	up	-//-
Cla004011	1862.17	869.747	1.0983	9.2169e-07	1.0654e-05	up	sp|Q9ZV36|UXS6_ARATH UDP-glucuronic acid decarboxylase 6 OS=Arabidopsis thaliana GN=UXS6 PE=2 SV=1//0
Cla004016	750.948	468.941	0.67931	0.0067145	0.026387	up	-//-
Cla004021	4022.52	2800.38	0.52248	0.012673	0.044213	up	sp|Q54JE4|ODO1_DICDI 2-oxoglutarate dehydrogenase, mitochondrial OS=Dictyostelium discoideum GN=ogdh PE=3 SV=1//1.82793e-111
Cla004022	13786.9	326.745	5.399	1.8088e-11	4.7744e-10	up	sp|O80638|WTR14_ARATH WAT1-related protein At2g39510 OS=Arabidopsis thaliana GN=At2g39510 PE=2 SV=1//2.12808e-61
Cla004024	7779.4	1354.65	2.5217	3.7381e-10	7.9843e-09	up	sp|O80638|WTR14_ARATH WAT1-related protein At2g39510 OS=Arabidopsis thaliana GN=At2g39510 PE=2 SV=1//6.61541e-124
Cla004048	3990.45	2053.27	0.95863	7.0054e-06	6.5882e-05	up	sp|Q86TU7|SETD3_HUMAN Histone-lysine N-methyltransferase setd3 OS=Homo sapiens GN=SETD3 PE=1 SV=1//5.15091e-19
Cla004058	8407.07	4089.8	1.0396	0.00059904	0.0033327	up	sp|Q9LK32|Y3721_ARATH Uncharacterized protein At3g27210 OS=Arabidopsis thaliana GN=Y-2 PE=1 SV=1//1.34015e-20
Cla004063	4840.85	2556.72	0.92097	0.001134	0.0058317	up	sp|P82024|RR21_SPIOL 30S ribosomal protein S21, chloroplastic (Fragment) OS=Spinacia oleracea GN=rps21 PE=1 SV=1//2.61968e-15
Cla004072	1482.33	717.003	1.0478	6.7469e-06	6.3831e-05	up	sp|Q8TP15|HTPX2_METAC Protease HtpX homolog 2 OS=Methanosarcina acetivorans (strain ATCC 35395 / DSM 2834 / JCM 12185 / C2A) GN=htpX2 PE=3 SV=1//6.28952e-11
Cla004075	2308.91	1381.41	0.74107	0.00076303	0.0041196	up	sp|P0AFR6|YCIO_SHIFL Uncharacterized protein YciO OS=Shigella flexneri GN=yciO PE=3 SV=1//1.44934e-28
Cla004078	2073.53	1308.18	0.66453	0.0022112	0.010393	up	sp|P38385|SC61G_ORYSJ Protein transport protein Sec61 subunit gamma OS=Oryza sativa subsp. japonica GN=Os02g0178400 PE=3 SV=1//6.15515e-31
Cla004094	5677.93	2587.74	1.1337	7.0703e-08	1.018e-06	up	sp|Q9XEX2|PRX2B_ARATH Peroxiredoxin-2B OS=Arabidopsis thaliana GN=PRXIIB PE=1 SV=1//2.42988e-95
Cla004109	1388.66	715.727	0.95621	3.3436e-05	0.00026998	up	sp|Q8W593|LGUC_ARATH Probable lactoylglutathione lyase, chloroplast OS=Arabidopsis thaliana GN=At1g67280 PE=1 SV=1//3.00442e-178
Cla004181	994.21	601.079	0.726	0.0034695	0.015176	up	sp|O50046|TRPB_CAMAC Tryptophan synthase beta chain 2, chloroplastic OS=Camptotheca acuminata GN=TSB PE=2 SV=1//0
Cla004183	2952	1316.84	1.1646	1.0968e-07	1.5221e-06	up	-//-
Cla004184	23.9994	1.91397	3.6484	0.0032467	0.014384	up	sp|Q93V99|PDF2_ARATH Homeobox-leucine zipper protein PROTODERMAL FACTOR 2 OS=Arabidopsis thaliana GN=PDF2 PE=2 SV=1//8.06404e-132
Cla004216	583.334	311.457	0.90529	0.00063194	0.0034933	up	sp|Q9FLW9|PKP2_ARATH Plastidial pyruvate kinase 2 OS=Arabidopsis thaliana GN=PKP2 PE=1 SV=1//0
Cla004219	321.964	101.349	1.6676	2.671e-07	3.4252e-06	up	-//-
Cla004220	121.337	4.70863	4.6876	6.6327e-14	2.373e-12	up	sp|Q9LYS2|AB10C_ARATH ABC transporter C family member 10 OS=Arabidopsis thaliana GN=ABCC10 PE=2 SV=2//0
Cla004222	13531.8	7273.16	0.89569	1.229e-05	0.00010895	up	sp|P35133|UBC10_ARATH Ubiquitin-conjugating enzyme E2 10 OS=Arabidopsis thaliana GN=UBC10 PE=1 SV=1//1.68594e-106
Cla004257	5065.01	2459.99	1.0419	9.4633e-07	1.092e-05	up	sp|Q92QQ2|CLPX_RHIME ATP-dependent Clp protease ATP-binding subunit ClpX OS=Rhizobium meliloti (strain 1021) GN=clpX PE=3 SV=1//2.32468e-140
Cla004259	745.38	24.0783	4.9522	2.6431e-06	2.7713e-05	up	sp|Q94A79|DMS3_ARATH Protein DEFECTIVE IN MERISTEM SILENCING 3 OS=Arabidopsis thaliana GN=DMS3 PE=1 SV=1//2.60603e-126
Cla004268	331.87	198.303	0.74291	0.011351	0.040466	up	sp|Q8VZV9|PTA7_ARATH Protein PLASTID TRANSCRIPTIONALLY ACTIVE 7 OS=Arabidopsis thaliana GN=PTAC7 PE=1 SV=1//8.51974e-64
Cla004271	1666.11	716.173	1.2181	1.7294e-05	0.00014893	up	sp|P81760|TL17_ARATH Thylakoid lumenal 17.4 kDa protein, chloroplastic OS=Arabidopsis thaliana GN=At5g53490 PE=1 SV=2//1.33713e-100
Cla004277	914.842	284.641	1.6844	3.8386e-11	9.7076e-10	up	sp|Q94A65|STR14_ARATH Rhodanese-like domain-containing protein 14, chloroplastic OS=Arabidopsis thaliana GN=At4g27700 PE=2 SV=1//2.87549e-92
Cla004282	6304.62	2445.07	1.3665	9.8072e-11	2.3211e-09	up	sp|Q8LHP0|ELOF1_ORYSJ Transcription elongation factor 1 homolog OS=Oryza sativa subsp. japonica GN=Os07g0631100 PE=3 SV=1//5.78821e-44
Cla004284	2473.74	601.91	2.0391	2.0826e-18	1.2135e-16	up	sp|Q0VC50|RT4I1_BOVIN Reticulon-4-interacting protein 1, mitochondrial OS=Bos taurus GN=RTN4IP1 PE=2 SV=1//5.05154e-46
Cla004286	629.312	297.306	1.0818	4.6352e-05	0.00036026	up	-//-
Cla004291	40.2808	8.96188	2.1682	0.0057872	0.023284	up	sp|B6IN38|RL33_RHOCS 50S ribosomal protein L33 OS=Rhodospirillum centenum (strain ATCC 51521 / SW) GN=rpmG PE=3 SV=1//1.32616e-10
Cla004294	287.645	135.027	1.091	0.00071026	0.0038588	up	sp|Q9LUH3|LAL5_ARATH MATE efflux family protein LAL5 OS=Arabidopsis thaliana GN=LAL5 PE=2 SV=1//5.41088e-162
Cla004297	2564.01	1278.87	1.0035	4.7884e-06	4.7099e-05	up	sp|Q5QQ53|XYLT_DROPS Xylosyltransferase oxt OS=Drosophila pseudoobscura pseudoobscura GN=oxt PE=2 SV=1//9.09485e-21
Cla004325	347.803	49.2103	2.8212	3.5913e-09	6.5239e-08	up	sp|O20252|S17P_SPIOL Sedoheptulose-1,7-bisphosphatase, chloroplastic OS=Spinacia oleracea PE=2 SV=1//0
Cla004329	20382.8	11096.1	0.8773	1.4903e-05	0.00012997	up	sp|O04197|COI1_ARATH Coronatine-insensitive protein 1 OS=Arabidopsis thaliana GN=COI1 PE=1 SV=1//0
Cla004339	326.329	67.4494	2.2744	2.6023e-11	6.7524e-10	up	sp|Q9FEL8|LAX1_MEDTR Auxin transporter-like protein 1 OS=Medicago truncatula GN=LAX1 PE=2 SV=1//0
Cla004343	2808.28	754.714	1.8957	4.3324e-17	2.272e-15	up	-//-
Cla004347	3952.33	2548.18	0.63324	0.0028374	0.012849	up	sp|Q39033|PLCD2_ARATH Phosphoinositide phospholipase C 2 OS=Arabidopsis thaliana GN=PLC2 PE=1 SV=1//0
Cla004353	162.346	29.3634	2.467	2.9972e-08	4.6553e-07	up	sp|Q39224|SRG1_ARATH Protein SRG1 OS=Arabidopsis thaliana GN=SRG1 PE=2 SV=1//3.02518e-71
Cla004363	3073.22	1842.31	0.73823	0.00053682	0.0030383	up	-//-
Cla004388	1366.7	570.17	1.2612	0.0042672	0.018024	up	sp|D3Z7P3|GLSK_MOUSE Glutaminase kidney isoform, mitochondrial OS=Mus musculus GN=Gls PE=1 SV=1//2.69755e-13
Cla004399	8284.37	4843.89	0.77423	0.00016533	0.0010975	up	sp|Q8LCG7|NFYC2_ARATH Nuclear transcription factor Y subunit C-2 OS=Arabidopsis thaliana GN=NFYC2 PE=2 SV=2//5.15875e-81
Cla004412	6106.99	2383.84	1.3572	1.25e-10	2.8932e-09	up	sp|B2V855|GATA_SULSY Glutamyl-tRNA(Gln) amidotransferase subunit A OS=Sulfurihydrogenibium sp. (strain YO3AOP1) GN=gatA PE=3 SV=1//3.05199e-50
Cla004451	10065.9	5372.04	0.90593	1.1352e-05	0.0001015	up	sp|F4JC97|PSME4_ARATH Proteasome activator subunit 4 OS=Arabidopsis thaliana GN=PA200 PE=2 SV=2//0
Cla004454	552.375	105.982	2.3818	7.3646e-16	3.3402e-14	up	sp|Q43609|COMT1_PRUDU Caffeic acid 3-O-methyltransferase OS=Prunus dulcis GN=COMT1 PE=2 SV=1//7.73454e-142
Cla004455	96.5109	37.018	1.3825	0.0065344	0.025801	up	-//-
Cla004456	315.4	119.371	1.4017	0.00016264	0.0010818	up	-//-
Cla004463	1536.56	386.949	1.9895	9.7039e-17	4.8224e-15	up	sp|Q9FM67|TI205_ARATH Protein TIC 20-v, chloroplastic OS=Arabidopsis thaliana GN=TIC20-V PE=2 SV=1//2.45002e-80
Cla004470	188.202	74.6907	1.3333	0.0004737	0.0027212	up	sp|Q0V9N0|S14L5_XENTR SEC14-like protein 5 OS=Xenopus tropicalis GN=sec14l1 PE=2 SV=1//2.05721e-12
Cla004477	500.028	209.308	1.2564	6.7488e-06	6.3831e-05	up	sp|F4K687|NMNAT_ARATH Nicotinamide/nicotinic acid mononucleotide adenylyltransferase OS=Arabidopsis thaliana GN=NMNAT PE=2 SV=1//5.49704e-120
Cla004483	14034.6	5017.65	1.4839	1.6971e-06	1.8593e-05	up	sp|Q9S7N7|PSAG_ARATH Photosystem I reaction center subunit V, chloroplastic OS=Arabidopsis thaliana GN=PSAG PE=2 SV=1//1.89691e-66
Cla004490	429.988	184.217	1.2229	2.6589e-05	0.00021995	up	-//-
Cla004497	2073.14	1022.44	1.0198	3.8543e-06	3.8851e-05	up	sp|Q94EH2|TI222_ARATH Mitochondrial import inner membrane translocase subunit TIM22-2 OS=Arabidopsis thaliana GN=TIM22-2 PE=1 SV=1//2.22201e-63
Cla004542	273.838	76.321	1.8432	0.00048147	0.0027603	up	sp|F4IJK1|NET2D_ARATH Protein NETWORKED 2D OS=Arabidopsis thaliana GN=NET2D PE=3 SV=1//8.53942e-113
Cla004553	494.996	275.148	0.84721	0.0017934	0.0086684	up	sp|Q500U8|TKPR1_ARATH Tetraketide alpha-pyrone reductase 1 OS=Arabidopsis thaliana GN=TKPR1 PE=1 SV=1//3.38361e-66
Cla004564	2665.41	1845.36	0.53046	0.013497	0.046608	up	sp|Q40359|ALFIN_MEDSA PHD finger protein Alfin1 OS=Medicago sativa GN=ALFIN-1 PE=1 SV=1//1.15582e-56
Cla004566	530.101	172.099	1.623	1.5318e-08	2.498e-07	up	sp|P69834|ISPD_ARATH 2-C-methyl-D-erythritol 4-phosphate cytidylyltransferase, chloroplastic OS=Arabidopsis thaliana GN=ISPD PE=1 SV=1//1.23605e-25
Cla004567	442.544	147.935	1.5809	1.1048e-07	1.5321e-06	up	sp|Q9LTB2|MMT1_ARATH Methionine S-methyltransferase OS=Arabidopsis thaliana GN=MMT1 PE=1 SV=1//0
Cla004584	7154.18	1368.72	2.386	1.8901e-27	2.2287e-25	up	sp|Q56X52|AOX4_ARATH Ubiquinol oxidase 4, chloroplastic/chromoplastic OS=Arabidopsis thaliana GN=AOX4 PE=1 SV=2//3.46575e-156
Cla004587	381.396	124.39	1.6164	1.9712e-07	2.6119e-06	up	sp|Q41141|PFPB_RICCO Pyrophosphate--fructose 6-phosphate 1-phosphotransferase subunit beta OS=Ricinus communis GN=PFP-BETA PE=3 SV=1//0
Cla004589	4234.72	2201.89	0.94353	1.0532e-05	9.4881e-05	up	sp|Q9SUG6|PUX3_ARATH Plant UBX domain-containing protein 3 OS=Arabidopsis thaliana GN=PUX3 PE=1 SV=1//5.77626e-129
Cla004590	1471.73	607.533	1.2765	0.0086794	0.032542	up	sp|Q9P281|BAHC1_HUMAN BAH and coiled-coil domain-containing protein 1 OS=Homo sapiens GN=BAHCC1 PE=1 SV=3//2.4547e-13
Cla004597	2812.97	1725.44	0.70514	0.0011543	0.0059193	up	sp|O95822|DCMC_HUMAN Malonyl-CoA decarboxylase, mitochondrial OS=Homo sapiens GN=MLYCD PE=1 SV=3//4.54202e-84
Cla004602	1471.04	737.752	0.99563	5.579e-05	0.00042499	up	sp|Q5XEZ5|CSC1_ARATH Calcium permeable stress-gated cation channel 1 OS=Arabidopsis thaliana GN=CSC1 PE=2 SV=1//2.10031e-83
Cla004604	544.786	278.738	0.96678	0.00027439	0.0016971	up	sp|P42856|ZB14_MAIZE 14 kDa zinc-binding protein OS=Zea mays GN=ZBP14 PE=1 SV=1//2.08852e-42
Cla004608	425.833	217.05	0.97226	0.00063556	0.0035104	up	sp|Q56XV8|CPNA2_ARATH Chaperonin 60 subunit alpha 2, chloroplastic OS=Arabidopsis thaliana GN=CPN60A2 PE=2 SV=1//0
Cla004609	3209.97	1460.62	1.136	5.7883e-07	6.9196e-06	up	sp|O82179|GCSH2_ARATH Glycine cleavage system H protein 2, mitochondrial OS=Arabidopsis thaliana GN=GDH2 PE=2 SV=1//6.95997e-89
Cla004612	5488.02	2101.24	1.385	7.95e-11	1.9227e-09	up	sp|Q10KF0|PSA2_ORYSJ Proteasome subunit alpha type-2 OS=Oryza sativa subsp. japonica GN=PAB1 PE=2 SV=1//2.02882e-141
Cla004613	3458.41	1521.65	1.1845	4.8417e-08	7.2929e-07	up	sp|Q9M4T8|PSA5_SOYBN Proteasome subunit alpha type-5 OS=Glycine max GN=PAE1 PE=2 SV=1//1.69324e-172
Cla004626	66.576	4.06695	4.033	1.8315e-07	2.443e-06	up	sp|Q6NQK2|NAC8_ARATH NAC domain-containing protein 8 OS=Arabidopsis thaliana GN=NAC008 PE=2 SV=1//6.68623e-74
Cla004641	115.431	0	Inf	3.1581e-21	2.4021e-19	up	-//-
Cla004644	649.516	403.147	0.68806	0.0066941	0.026327	up	sp|Q0WPX7|BAG2_ARATH BAG family molecular chaperone regulator 2 OS=Arabidopsis thaliana GN=BAG2 PE=1 SV=1//4.07644e-13
Cla004647	1001.6	638.8	0.64887	0.0065174	0.025744	up	sp|P57758|CTNS_ARATH Cystinosin homolog OS=Arabidopsis thaliana GN=At5g40670 PE=2 SV=1//2.5627e-126
Cla004657	4062.34	2092.97	0.95676	0.0047608	0.019798	up	sp|Q0JHU5|ERG1_ORYSJ Elicitor-responsive protein 1 OS=Oryza sativa subsp. japonica GN=ERG1 PE=2 SV=1//2.40077e-49
Cla004660	1412.52	886.987	0.67129	0.0038978	0.01672	up	-//-
Cla004665	1672.97	973.108	0.78174	0.00044301	0.0025679	up	sp|Q7Y0E8|NRX11_ORYSJ Probable nucleoredoxin 1-1 OS=Oryza sativa subsp. japonica GN=Os03g0405500 PE=2 SV=1//3.54067e-07
Cla004677	5119.17	2517.11	1.0241	0.0052224	0.021371	up	sp|Q9LHA8|MD37C_ARATH Probable mediator of RNA polymerase II transcription subunit 37c OS=Arabidopsis thaliana GN=MED37C PE=1 SV=1//0
Cla004683	7994.99	2146.78	1.8969	8.7176e-17	4.387e-15	up	sp|P22954|MD37D_ARATH Probable mediator of RNA polymerase II transcription subunit 37c OS=Arabidopsis thaliana GN=MED37D PE=1 SV=2//0
Cla004684	4702.5	1888.26	1.3164	7.8843e-10	1.6198e-08	up	sp|Q9ZV36|UXS6_ARATH UDP-glucuronic acid decarboxylase 6 OS=Arabidopsis thaliana GN=UXS6 PE=2 SV=1//0
Cla004685	2467.53	1074.18	1.1998	5.3463e-08	7.9832e-07	up	sp|Q9M2T9|SYMM_ARATH Methionine--tRNA ligase, chloroplastic/mitochondrial OS=Arabidopsis thaliana GN=OVA1 PE=2 SV=1//0
Cla004686	2203.4	888.475	1.3103	4.5076e-09	8.0563e-08	up	sp|O04469|ECI1_ARATH Enoyl-CoA delta isomerase 1, peroxisomal OS=Arabidopsis thaliana GN=ECI1 PE=1 SV=1//4.49036e-92
Cla004695	2772.24	657.261	2.0765	0.0010104	0.005275	up	sp|O80638|WTR14_ARATH WAT1-related protein At2g39510 OS=Arabidopsis thaliana GN=At2g39510 PE=2 SV=1//6.4081e-140
Cla004698	556.749	141.855	1.9726	1.0552e-11	2.8924e-10	up	sp|O80634|PNSL1_ARATH Photosynthetic NDH subunit of lumenal location 1, chloroplastic OS=Arabidopsis thaliana GN=PNSL1 PE=1 SV=2//3.9379e-84
Cla004703	106.171	47.5142	1.16	0.012284	0.043112	up	sp|P82538|PPL1_ARATH PsbP-like protein 1, chloroplastic OS=Arabidopsis thaliana GN=PPL1 PE=1 SV=1//2.41228e-31
Cla004704	323.398	171.094	0.91852	0.0022345	0.010482	up	sp|P82538|PPL1_ARATH PsbP-like protein 1, chloroplastic OS=Arabidopsis thaliana GN=PPL1 PE=1 SV=1//1.08535e-49
Cla004714	583.996	142.669	2.0333	1.9584e-12	5.9043e-11	up	-//-
Cla004715	1603.41	1008.99	0.66823	0.0030446	0.013647	up	sp|Q9FQ24|TON1B_ARATH Protein TONNEAU 1b OS=Arabidopsis thaliana GN=TON1B PE=1 SV=1//2.0943e-119
Cla004729	3193.3	1370.28	1.2206	3.9829e-08	6.0775e-07	up	sp|O49169|EF1A_MANES Elongation factor 1-alpha OS=Manihot esculenta GN=EF1 PE=3 SV=1//0
Cla004732	1816.22	961.5	0.91758	4.0176e-05	0.00031859	up	-//-
Cla004739	2837.74	1854.63	0.61361	0.0080298	0.03059	up	-//-
Cla004746	1319.8	270.364	2.2873	7.5719e-21	5.6094e-19	up	sp|P12360|CB11_SOLLC Chlorophyll a-b binding protein 6A, chloroplastic OS=Solanum lycopersicum GN=CAB6A PE=2 SV=1//6.68785e-154
Cla004747	291.22	132.536	1.1357	0.00043312	0.00252	up	sp|O76743|GLH4_CAEEL ATP-dependent RNA helicase glh-4 OS=Caenorhabditis elegans GN=glh-4 PE=1 SV=2//1.40222e-07
Cla004756	2640.25	918.958	1.5226	5.085e-12	1.4518e-10	up	-//-
Cla004786	75.1432	17.6391	2.0909	0.00055316	0.0031192	up	sp|Q9XIK4|U202A_ARATH UPF0202 protein At1g10490 OS=Arabidopsis thaliana GN=At1g10490 PE=2 SV=2//6.56184e-30
Cla004795	3457.23	2150.03	0.68526	0.0013019	0.0065834	up	-//-
Cla004804	467.444	28.9478	4.0133	0.00013923	0.00094889	up	sp|Q7XKV4|BGL12_ORYSJ Beta-glucosidase 12 OS=Oryza sativa subsp. japonica GN=BGLU12 PE=2 SV=2//0
Cla004819	2455.71	1662.94	0.5624	0.0087281	0.032664	up	sp|Q9SYH1|RSH3C_ARATH Probable GTP diphosphokinase RSH3, chloroplastic OS=Arabidopsis thaliana GN=RSH3 PE=2 SV=1//8.31845e-29
Cla004837	1056.15	383.938	1.4599	4.0052e-09	7.2471e-08	up	sp|Q9FJP3|RK29_ARATH 50S ribosomal protein L29, chloroplastic OS=Arabidopsis thaliana GN=RPL29 PE=1 SV=1//6.33224e-58
Cla004846	27623.7	18855.8	0.55089	0.0055735	0.02257	up	sp|Q9T074|PCKA_ARATH Phosphoenolpyruvate carboxykinase [ATP] OS=Arabidopsis thaliana GN=PCKA PE=1 SV=1//0
Cla004848	1695.51	648.718	1.3861	2.3088e-09	4.3241e-08	up	sp|Q8LDD3|CUT1D_ARATH Protein CURVATURE THYLAKOID 1D, chloroplastic OS=Arabidopsis thaliana GN=CURT1D PE=1 SV=1//1.1383e-34
Cla004887	1000.74	588.351	0.76632	0.0014219	0.0070842	up	sp|Q9STP8|ACBP2_ARATH Acyl-CoA-binding domain-containing protein 2 OS=Arabidopsis thaliana GN=ACBP2 PE=1 SV=1//4.27457e-42
Cla004891	2870.58	1699.64	0.75611	0.00030804	0.001871	up	sp|B7KWT4|RUTD_METC4 Putative aminoacrylate hydrolase RutD OS=Methylobacterium extorquens (strain CM4 / NCIMB 13688) GN=rutD PE=3 SV=1//3.46414e-15
Cla004895	11015.1	6585.68	0.74208	0.00033721	0.0020216	up	sp|Q80YA7|DPP8_MOUSE Dipeptidyl peptidase 8 OS=Mus musculus GN=Dpp8 PE=2 SV=1//2.85275e-88
Cla004900	1557.59	916.488	0.76513	0.00069931	0.0038076	up	sp|Q8BTE0|SDHF4_MOUSE Succinate dehydrogenase assembly factor 4, mitochondrial OS=Mus musculus GN=Sdhaf4 PE=3 SV=2//1.54519e-11
Cla004905	3230.15	2046.68	0.65832	0.0018578	0.0089403	up	sp|Q9FGM0|FTSHB_ARATH ATP-dependent zinc metalloprotease FTSH 11, chloroplastic/mitochondrial OS=Arabidopsis thaliana GN=FTSH11 PE=1 SV=1//0
Cla004909	20770.3	2029.48	3.3553	5.3334e-07	6.4453e-06	up	sp|Q5NAZ9|SWT3B_ORYSJ Bidirectional sugar transporter SWEET3b OS=Oryza sativa subsp. japonica GN=SWEET3B PE=3 SV=2//9.34662e-42
Cla004917	1450.05	646.909	1.1645	4.9225e-07	5.9788e-06	up	-//-
Cla004918	1321.74	868.92	0.60514	0.0085805	0.032251	up	sp|Q94F27|B3GTB_ARATH Probable beta-1,3-galactosyltransferase 11 OS=Arabidopsis thaliana GN=B3GALT11 PE=2 SV=1//6.94581e-152
Cla004939	1330.42	619.502	1.1027	2.4052e-06	2.5414e-05	up	-//-
Cla004941	1801.81	923.72	0.96392	1.7186e-05	0.00014807	up	sp|Q8H0W3|RVE6_ARATH Protein REVEILLE 6 OS=Arabidopsis thaliana GN=RVE6 PE=2 SV=1//1.65898e-107
Cla004946	7713.78	4363.91	0.82181	7.6339e-05	0.00055781	up	sp|Q9FYR7|SCL8_ARATH Scarecrow-like protein 8 OS=Arabidopsis thaliana GN=SCL8 PE=2 SV=1//5.9764e-155
Cla004955	1293.24	700.082	0.88539	0.0001555	0.0010401	up	sp|Q6RVV4|TIC32_PEA Short-chain dehydrogenase TIC 32, chloroplastic OS=Pisum sativum GN=TIC32 PE=1 SV=1//3.84938e-150
Cla004970	7467.77	611.099	3.6112	9.2196e-21	6.7547e-19	up	sp|Q9FGJ6|ATL79_ARATH RING-H2 finger protein ATL79 OS=Arabidopsis thaliana GN=ATL79 PE=2 SV=1//7.19854e-31
Cla004971	2025.86	1000.29	1.0181	4.1347e-06	4.126e-05	up	-//-
Cla004972	981.673	199.147	2.3014	2.0064e-18	1.1725e-16	up	sp|Q9CAI3|CADH1_ARATH Probable cinnamyl alcohol dehydrogenase 1 OS=Arabidopsis thaliana GN=CAD1 PE=2 SV=1//4.19943e-107
Cla004978	1559.53	853.598	0.86948	9.5431e-05	0.00067798	up	-//-
Cla004983	2352.62	908.003	1.3735	8.1976e-10	1.6807e-08	up	sp|Q9MAP3|RK11_ARATH 50S ribosomal protein L11, chloroplastic OS=Arabidopsis thaliana GN=RPL11 PE=2 SV=1//1.72298e-51
Cla004989	14870.2	7800.11	0.93086	3.9835e-05	0.00031627	up	sp|O82627|SSG1_ANTMA Granule-bound starch synthase 1, chloroplastic/amyloplastic OS=Antirrhinum majus GN=WAXY PE=2 SV=1//0
Cla005001	4155.41	2278.72	0.86677	8.1747e-05	0.00059239	up	sp|Q9LZA6|SDP1_ARATH Triacylglycerol lipase SDP1 OS=Arabidopsis thaliana GN=SDP1 PE=1 SV=1//0
Cla005005	7087.79	4460.18	0.66824	0.0013422	0.0067542	up	sp|Q39096|ERD15_ARATH Protein EARLY RESPONSIVE TO DEHYDRATION 15 OS=Arabidopsis thaliana GN=ERD15 PE=1 SV=1//1.09236e-23
Cla005011	2459.07	1219.45	1.0119	4.0207e-06	4.0305e-05	up	sp|Q43503|LCYB_SOLLC Lycopene beta cyclase, chloroplastic OS=Solanum lycopersicum GN=LCY1 PE=1 SV=1//0
Cla005036	3869.49	1723.82	1.1665	4.9909e-08	7.5007e-07	up	-//-
Cla005042	2919.71	106.543	4.7763	1.0129e-06	1.1634e-05	up	sp|Q8LEE9|FLA12_ARATH Fasciclin-like arabinogalactan protein 12 OS=Arabidopsis thaliana GN=FLA12 PE=2 SV=2//1.33093e-50
Cla005046	354.595	149.208	1.2488	0.00016871	0.0011162	up	sp|Q94KB9|MLO3_ARATH MLO-like protein 3 OS=Arabidopsis thaliana GN=MLO3 PE=2 SV=1//5.83567e-120
Cla005050	1767.42	916.079	0.9481	2.6174e-05	0.00021679	up	-//-
Cla005057	25.5093	0	Inf	1.3617e-05	0.00011959	up	sp|Q9M1E7|TET3_ARATH Tetraspanin-3 OS=Arabidopsis thaliana GN=TET3 PE=2 SV=1//1.46398e-150
Cla005061	1695.19	644.524	1.3951	1.4256e-07	1.9392e-06	up	sp|Q6NMM8|F8H_ARATH Probable glucuronoxylan glucuronosyltransferase F8H OS=Arabidopsis thaliana GN=F8H PE=2 SV=1//9.69138e-179
Cla005062	2847.24	804.055	1.8242	4.9486e-16	2.3041e-14	up	sp|P25864|RK9_ARATH 50S ribosomal protein L9, chloroplastic OS=Arabidopsis thaliana GN=RPL9 PE=2 SV=1//7.60958e-44
Cla005077	1189.54	77.4307	3.9414	5.043e-44	1.7033e-41	up	-//-
Cla005092	4749.76	2690.85	0.8198	9.8976e-05	0.00070018	up	sp|O49818|LGUL_CICAR Lactoylglutathione lyase OS=Cicer arietinum PE=2 SV=1//1.14047e-113
Cla005109	3735.56	2511.84	0.57258	0.0064319	0.025464	up	sp|Q9S850|SUOX_ARATH Sulfite oxidase OS=Arabidopsis thaliana GN=SOX PE=1 SV=1//1.27467e-84
Cla005116	11628.1	3699.55	1.6522	4.3823e-15	1.7969e-13	up	sp|Q5RC94|NBR1_PONAB Next to BRCA1 gene 1 protein OS=Pongo abelii GN=NBR1 PE=2 SV=1//3.81393e-15
Cla005118	1122.63	380.983	1.5591	1.9109e-10	4.2787e-09	up	sp|Q5JME8|DI195_ORYSJ Protein DEHYDRATION-INDUCED 19 homolog 5 OS=Oryza sativa subsp. japonica GN=DI19-5 PE=2 SV=1//1.02371e-29
Cla005122	118.648	41.3689	1.5201	0.0010457	0.0054368	up	sp|Q8H5F8|ADPRM_ORYSJ Manganese-dependent ADP-ribose/CDP-alcohol diphosphatase OS=Oryza sativa subsp. japonica GN=Os07g0688000 PE=2 SV=1//1.99675e-155
Cla005127	20300.2	7822.02	1.3759	1.1257e-11	3.073e-10	up	sp|P24465|C71A1_PERAE Cytochrome P450 71A1 OS=Persea americana GN=CYP71A1 PE=1 SV=2//3.17622e-166
Cla005130	2957.97	1633.06	0.85703	7.5303e-05	0.00055252	up	sp|Q9MA15|Y1796_ARATH Uncharacterized aarF domain-containing protein kinase At1g79600, chloroplastic OS=Arabidopsis thaliana GN=At1g79600 PE=2 SV=1//0
Cla005133	4320.88	1331.84	1.6979	5.6808e-15	2.2687e-13	up	sp|Q8L7S8|RH3_ARATH DEAD-box ATP-dependent RNA helicase 3, chloroplastic OS=Arabidopsis thaliana GN=RH3 PE=1 SV=2//0
Cla005134	1020.63	619.558	0.72015	0.0026727	0.012221	up	sp|Q66GM8|PAE10_ARATH Pectin acetylesterase 10 OS=Arabidopsis thaliana GN=PAE10 PE=2 SV=1//0
Cla005143	249.487	22.5658	3.4668	9.0305e-17	4.533e-15	up	-//-
Cla005157	3069.36	1665.61	0.88189	4.201e-05	0.00033064	up	sp|A4IF69|NHLC2_BOVIN NHL repeat-containing protein 2 OS=Bos taurus GN=NHLRC2 PE=2 SV=1//3.40014e-123
Cla005174	1440.96	983.757	0.55065	0.013349	0.046208	up	sp|Q84J78|SSBP_ARATH Single-stranded DNA-binding protein, mitochondrial OS=Arabidopsis thaliana GN=At4g11060 PE=2 SV=1//5.50175e-74
Cla005181	428.926	188.644	1.1851	3.9782e-05	0.00031603	up	sp|Q9FJ10|GAT16_ARATH GATA transcription factor 16 OS=Arabidopsis thaliana GN=GATA16 PE=2 SV=1//2.79786e-18
Cla005192	2662.55	1564	0.76756	0.0004295	0.0025005	up	sp|Q9ZQX4|VATF_ARATH V-type proton ATPase subunit F OS=Arabidopsis thaliana GN=VHA-F PE=2 SV=1//2.90173e-78
Cla005194	2810.78	844.665	1.7345	1.2958e-14	4.9755e-13	up	-//-
Cla005200	790.294	414.96	0.92941	0.012088	0.042597	up	sp|Q5J907|TCTP_ELAGV Translationally-controlled tumor protein homolog OS=Elaeis guineensis var. tenera GN=TCTP PE=2 SV=1//1.07614e-93
Cla005201	4235.8	1874.59	1.1761	3.4573e-08	5.3244e-07	up	sp|Q9SEI2|PS6AA_ARATH 26S protease regulatory subunit 6A homolog A OS=Arabidopsis thaliana GN=RPT5A PE=1 SV=1//0
Cla005202	2660.11	1402.68	0.9233	3.951e-05	0.00031406	up	sp|P36181|HSP80_SOLLC Heat shock cognate protein 80 OS=Solanum lycopersicum GN=HSC80 PE=2 SV=1//0
Cla005204	196.419	85.2041	1.2049	0.0043111	0.018178	up	sp|P36181|HSP80_SOLLC Heat shock cognate protein 80 OS=Solanum lycopersicum GN=HSC80 PE=2 SV=1//0
Cla005210	12563.6	2473.48	2.3446	1.9171e-22	1.6467e-20	up	sp|P34913|HYES_HUMAN Bifunctional epoxide hydrolase 2 OS=Homo sapiens GN=EPHX2 PE=1 SV=2//5.25313e-50
Cla005212	2920.08	1929.79	0.59756	0.0055473	0.022478	up	-//-
Cla005222	7246.58	1839.65	1.9779	8.4798e-20	5.6706e-18	up	sp|Q9MA63|Y3550_ARATH REF/SRPP-like protein At3g05500 OS=Arabidopsis thaliana GN=At3g05500 PE=1 SV=1//2.83103e-99
Cla005243	98.0066	14.431	2.7637	1.4105e-06	1.5729e-05	up	sp|Q5KS50|NPH3_ORYSJ Coleoptile phototropism protein 1 OS=Oryza sativa subsp. japonica GN=CPT1 PE=2 SV=1//1.54707e-94
Cla005262	258.722	56.3441	2.1991	2.5442e-09	4.7208e-08	up	-//-
Cla005294	654.78	173.352	1.9173	4.1764e-12	1.208e-10	up	sp|Q8VY88|LTD_ARATH Protein LHCP TRANSLOCATION DEFECT OS=Arabidopsis thaliana GN=LTD PE=1 SV=1//2.90971e-71
Cla005298	12702.9	7934.09	0.67902	0.00073802	0.0039944	up	-//-
Cla005304	771.686	454.036	0.76521	0.0025293	0.011681	up	sp|Q94AM9|CID4_ARATH Polyadenylate-binding protein-interacting protein 4 OS=Arabidopsis thaliana GN=CID4 PE=2 SV=1//6.18369e-11
Cla005307	221.73	87.576	1.3402	0.00025054	0.001572	up	sp|Q42670|PLSC_COCNU 1-acyl-sn-glycerol-3-phosphate acyltransferase OS=Cocos nucifera PE=1 SV=1//2.44207e-146
Cla005320	25735.6	4238.65	2.6021	1.5419e-28	2.0349e-26	up	sp|B9HTL5|CSPLC_POPTR CASP-like protein 2D1 OS=Populus trichocarpa GN=POPTRDRAFT_833824 PE=3 SV=1//2.89661e-49
Cla005332	3281.96	923.645	1.8291	2.9616e-14	1.093e-12	up	sp|Q43087|PYRB2_PEA Aspartate carbamoyltransferase 2, chloroplastic OS=Pisum sativum GN=PYRB2 PE=2 SV=1//0
Cla005337	156.658	17.3562	3.1741	7.4055e-11	1.7975e-09	up	sp|Q9ZU91|E133_ARATH Glucan endo-1,3-beta-glucosidase 3 OS=Arabidopsis thaliana GN=At2g01630 PE=1 SV=2//7.73167e-114
Cla005341	542.516	175.526	1.628	1.0529e-07	1.4663e-06	up	sp|Q8S9L5|TIG_ARATH Trigger factor-like protein TIG, Chloroplastic OS=Arabidopsis thaliana GN=TIG PE=2 SV=1//0
Cla005344	4563.81	1232.2	1.889	7.267e-18	4.0227e-16	up	sp|P21357|AROF_SOLTU Phospho-2-dehydro-3-deoxyheptonate aldolase 1, chloroplastic OS=Solanum tuberosum GN=SHKA PE=1 SV=2//0
Cla005352	1107.04	692.727	0.67635	0.0037153	0.016067	up	sp|Q3T0G5|PROSC_BOVIN Proline synthase co-transcribed bacterial homolog protein OS=Bos taurus GN=PROSC PE=2 SV=1//4.52769e-72
Cla005356	39.5403	0.685192	5.8507	7.8608e-07	9.2201e-06	up	-//-
Cla005359	831.258	533.163	0.64072	0.0084672	0.031921	up	sp|Q42545|FTSZ1_ARATH Cell division protein FtsZ homolog 1, chloroplastic OS=Arabidopsis thaliana GN=FTSZ1 PE=1 SV=2//0
Cla005375	1201.22	760.76	0.65899	0.0038459	0.016539	up	sp|Q40194|RB11D_LOTJA Ras-related protein Rab11D OS=Lotus japonicus GN=RAB11D PE=2 SV=1//4.68839e-133
Cla005377	540.199	197.31	1.453	2.0379e-07	2.6895e-06	up	sp|P16273|PRPX_HORVU Pathogen-related protein OS=Hordeum vulgare PE=2 SV=2//4.75716e-64
Cla005381	11191.5	6584.56	0.76525	0.0002182	0.0013933	up	sp|Q93VI8|TLP7_ARATH Tubby-like F-box protein 7 OS=Arabidopsis thaliana GN=TULP7 PE=2 SV=1//1.66859e-179
Cla005382	3313.19	1887.86	0.81147	0.00015743	0.0010514	up	sp|Q93ZB6|DCUP1_ARATH Uroporphyrinogen decarboxylase 1, chloroplastic OS=Arabidopsis thaliana GN=HEME1 PE=2 SV=2//0
Cla005387	372.884	186.226	1.0017	0.00092834	0.0048982	up	sp|Q9MAH4|AB10G_ARATH ABC transporter G family member 10 OS=Arabidopsis thaliana GN=ABCG10 PE=3 SV=1//0
Cla005395	916.809	583.165	0.65272	0.0066484	0.026182	up	sp|P93847|RL10_SOLME 60S ribosomal protein L10 OS=Solanum melongena GN=RPL10 PE=2 SV=1//2.58323e-71
Cla005398	8054.58	1668.64	2.2711	1.9473e-25	2.144e-23	up	sp|Q9Y5Z4|HEBP2_HUMAN Heme-binding protein 2 OS=Homo sapiens GN=HEBP2 PE=1 SV=1//4.63018e-23
Cla005402	52.3349	0	Inf	1.3985e-10	3.2033e-09	up	sp|Q6H9K0|PGLR2_PLAAC Exopolygalacturonase (Fragment) OS=Platanus acerifolia GN=plaa2 PE=1 SV=1//6.14979e-113
Cla005403	7256.18	4087.78	0.82789	5.9747e-05	0.00045066	up	sp|Q9LRR6|CID9_ARATH Polyadenylate-binding protein-interacting protein 9 OS=Arabidopsis thaliana GN=CID9 PE=3 SV=1//2.12418e-119
Cla005408	3474.31	1236.86	1.49	1.2994e-05	0.00011468	up	sp|P49332|GSTXC_TOBAC Probable glutathione S-transferase parC OS=Nicotiana tabacum GN=PARC PE=2 SV=1//2.71615e-116
Cla005412	232.617	2.83817	6.3569	4.3559e-30	6.43e-28	up	sp|Q9C8M5|WAG1_ARATH Serine/threonine-protein kinase WAG1 OS=Arabidopsis thaliana GN=WAG1 PE=2 SV=1//9.55584e-162
Cla005420	22589.1	9049.25	1.3198	8.6244e-10	1.7645e-08	up	sp|Q40519|PSBR_TOBAC Photosystem II 10 kDa polypeptide, chloroplastic OS=Nicotiana tabacum GN=PSBR PE=2 SV=1//8.55425e-57
Cla005425	1901.48	631.303	1.5907	2.8428e-12	8.4052e-11	up	sp|Q9SSU8|PSY_DAUCA Phytoene synthase, chloroplastic OS=Daucus carota GN=PSY PE=2 SV=1//1.87439e-177
Cla005429	22063.1	4060.06	2.4421	4.465e-28	5.5612e-26	up	sp|Q9SLQ8|PSBP_CUCSA Oxygen-evolving enhancer protein 2, chloroplastic OS=Cucumis sativus GN=PSBP PE=2 SV=1//4.99594e-174
Cla005445	484.068	303.996	0.67116	0.013849	0.047593	up	sp|O48921|C97B2_SOYBN Cytochrome P450 97B2, chloroplastic OS=Glycine max GN=CYP97B2 PE=2 SV=1//0
Cla005451	1219.53	591.276	1.0444	1.0511e-05	9.4823e-05	up	sp|Q07512|FLS_PETHY Flavonol synthase/flavanone 3-hydroxylase OS=Petunia hybrida GN=FL PE=2 SV=1//1.5035e-62
Cla005456	35900.6	9844.4	1.8666	7.0004e-19	4.319e-17	up	-//-
Cla005462	5946.02	4002.63	0.57098	0.0054664	0.0222	up	sp|Q9FH80|BAM8_ARATH Beta-amylase 8 OS=Arabidopsis thaliana GN=BAM8 PE=2 SV=1//0
Cla005490	624.615	284.357	1.1353	0.00017249	0.0011375	up	-//-
Cla005495	2883.97	930.366	1.6322	2.6946e-13	9.0705e-12	up	sp|Q9LTV6|DECR2_ARATH Peroxisomal 2,4-dienoyl-CoA reductase OS=Arabidopsis thaliana GN=At3g12800 PE=2 SV=1//4.92961e-161
Cla005507	524.235	68.5256	2.9355	9.8295e-21	7.1752e-19	up	sp|Q8LBW3|LBD12_ARATH LOB domain-containing protein 12 OS=Arabidopsis thaliana GN=LBD12 PE=2 SV=2//1.29883e-49
Cla005514	1598.01	885.865	0.85112	0.00016501	0.0010961	up	sp|Q9SJG2|Y2296_ARATH Probable receptor-like protein kinase At2g42960 OS=Arabidopsis thaliana GN=At2g42960 PE=3 SV=1//0
Cla005516	171.644	84.3043	1.0257	0.0073915	0.028574	up	-//-
Cla005531	363.237	197.766	0.87712	0.0030769	0.013757	up	sp|P38812|GEP4_YEAST Phosphatidylglycerophosphatase GEP4, mitochondrial OS=Saccharomyces cerevisiae (strain ATCC 204508 / S288c) GN=GEP4 PE=1 SV=1//2.32694e-12
Cla005539	3578.25	2443.84	0.55011	0.011071	0.039637	up	sp|Q9XGM1|VATD_ARATH V-type proton ATPase subunit D OS=Arabidopsis thaliana GN=VHA-D PE=1 SV=2//1.0063e-161
Cla005540	1250.33	630.379	0.98801	2.2103e-05	0.00018601	up	sp|Q9LI77|GATA_ARATH Glutamyl-tRNA(Gln) amidotransferase subunit A, chloroplastic/mitochondrial OS=Arabidopsis thaliana GN=GATA PE=2 SV=1//0
Cla005542	6920.3	1755.46	1.979	1.7991e-15	7.7771e-14	up	sp|C0LGE0|Y1765_ARATH Probable LRR receptor-like serine/threonine-protein kinase At1g07650 OS=Arabidopsis thaliana GN=At1g07650 PE=1 SV=1//0
Cla005543	106.503	5.04583	4.3997	8.4591e-12	2.338e-10	up	sp|Q6DR10|TBL43_ARATH Protein trichome birefringence-like 43 OS=Arabidopsis thaliana GN=TBL43 PE=2 SV=1//1.21629e-146
Cla005544	9749	4964.73	0.97354	2.099e-06	2.2598e-05	up	sp|Q4UKR8|HSPC2_RICFE Small heat shock protein C2 OS=Rickettsia felis (strain ATCC VR-1525 / URRWXCal2) GN=hspC2 PE=3 SV=1//1.71644e-15
Cla005552	976.811	538.657	0.85871	0.00033346	0.0020034	up	-//-
Cla005556	1579.91	1084.37	0.54298	0.01301	0.045224	up	-//-
Cla005558	3743.29	1511.62	1.3082	1.4431e-09	2.792e-08	up	-//-
Cla005559	904.819	598.174	0.59706	0.013039	0.04531	up	sp|Q9LQY3|P24D9_ARATH Transmembrane emp24 domain-containing protein p24delta9 OS=Arabidopsis thaliana GN=At1g26690 PE=2 SV=1//2.71868e-57
Cla005564	1146.53	618.659	0.89005	0.0001812	0.0011878	up	sp|Q9C4Z7|MINE1_ARATH Cell division topological specificity factor homolog, chloroplastic OS=Arabidopsis thaliana GN=MINE1 PE=1 SV=1//2.50738e-71
Cla005570	2146	707.177	1.6015	1.9896e-12	5.9893e-11	up	sp|Q6R8G7|PHO13_ARATH Phosphate transporter PHO1 homolog 3 OS=Arabidopsis thaliana GN=PHO1;H3 PE=2 SV=2//0
Cla005571	3884.67	2570.02	0.59601	0.0041853	0.017723	up	sp|Q6P4K8|PIN4_XENTR Peptidyl-prolyl cis-trans isomerase NIMA-interacting 4 OS=Xenopus tropicalis GN=pin4 PE=2 SV=1//3.4229e-23
Cla005572	799.422	286.421	1.4808	1.0952e-08	1.8356e-07	up	sp|P94026|RBCMT_TOBAC Ribulose-1,5 bisphosphate carboxylase/oxygenase large subunit N-methyltransferase, chloroplastic OS=Nicotiana tabacum GN=RBCMT PE=2 SV=1//0
Cla005583	3553.08	1798.21	0.98251	5.4515e-06	5.2917e-05	up	sp|P42762|CLPD_ARATH Chaperone protein ClpD, chloroplastic OS=Arabidopsis thaliana GN=CLPD PE=1 SV=1//3.16781e-83
Cla005589	2485.7	1232.73	1.0118	4.2935e-06	4.2673e-05	up	sp|Q0WLR1|QKIL1_ARATH KH domain-containing protein At4g26480 OS=Arabidopsis thaliana GN=At4g26480 PE=2 SV=1//1.89649e-54
Cla005592	1276.88	774.512	0.72127	0.0019247	0.0092134	up	sp|A1DCU5|DDI1_NEOFI DNA damage-inducible protein 1 OS=Neosartorya fischeri (strain ATCC 1020 / DSM 3700 / FGSC A1164 / NRRL 181) GN=ddi1 PE=3 SV=1//4.39418e-84
Cla005596	1917.53	687.083	1.4807	8.3535e-11	2.0057e-09	up	-//-
Cla005597	3770.54	2052.93	0.87709	4.1251e-05	0.00032569	up	sp|Q8LB10|CLPR4_ARATH ATP-dependent Clp protease proteolytic subunit-related protein 4, chloroplastic OS=Arabidopsis thaliana GN=CLPR4 PE=1 SV=1//1.90165e-145
Cla005600	3109.92	2040.76	0.60777	0.0041568	0.017621	up	sp|Q8W4H1|GAT26_ARATH GATA transcription factor 26 OS=Arabidopsis thaliana GN=GATA26 PE=2 SV=1//3.10284e-99
Cla005606	6197.72	2614.92	1.245	3.9501e-09	7.1561e-08	up	sp|Q8W463|RK191_ARATH 50S ribosomal protein L19-1, chloroplastic OS=Arabidopsis thaliana GN=At4g17560 PE=2 SV=1//2.58087e-55
Cla005612	1606.96	1082.19	0.57039	0.010263	0.037186	up	sp|Q2TBG8|UCHL3_BOVIN Ubiquitin carboxyl-terminal hydrolase isozyme L3 OS=Bos taurus GN=UCHL3 PE=2 SV=1//8.21795e-27
Cla005615	3852.25	2657.53	0.53561	0.012142	0.042742	up	sp|Q8L7W2|NUDT8_ARATH Nudix hydrolase 8 OS=Arabidopsis thaliana GN=NUDT8 PE=2 SV=2//2.94956e-128
Cla005617	797.519	207.427	1.9429	2.3374e-08	3.7056e-07	up	sp|Q20390|PPT1_CAEEL Palmitoyl-protein thioesterase 1 OS=Caenorhabditis elegans GN=ppt-1 PE=2 SV=2//3.12999e-38
Cla005619	874.104	396.282	1.1413	3.3985e-05	0.00027386	up	-//-
Cla005624	557.983	208.001	1.4236	2.9843e-07	3.7953e-06	up	sp|F4JP46|PURU2_ARATH Formyltetrahydrofolate deformylase 2, mitochondrial OS=Arabidopsis thaliana GN=PURU2 PE=1 SV=1//5.33774e-148
Cla005637	1200.01	793.878	0.59605	0.0096557	0.035472	up	sp|O48593|SYNO_ARATH Asparagine--tRNA ligase, chloroplastic/mitochondrial OS=Arabidopsis thaliana GN=SYNO PE=2 SV=3//0
Cla005645	4185.63	863.366	2.2774	1.5524e-23	1.4323e-21	up	sp|P11890|HS23C_OXYRB Small heat shock protein, chloroplastic OS=Oxybasis rubra GN=HSP23 PE=2 SV=1//1.19148e-48
Cla005671	1526.76	876.2	0.80114	0.00037194	0.0022027	up	sp|Q9SXD5|GSXL3_ARATH Flavin-containing monooxygenase FMO GS-OX-like 3 OS=Arabidopsis thaliana GN=At1g62620 PE=2 SV=2//0
Cla005678	125.979	30.4188	2.0501	4.1555e-05	0.00032778	up	sp|Q9ZUZ3|SAU32_ARATH Auxin-responsive protein SAUR32 OS=Arabidopsis thaliana GN=SAUR32 PE=2 SV=1//3.10605e-19
Cla005682	26501.6	9910.97	1.419	4.9421e-12	1.413e-10	up	-//-
Cla005690	643.975	406.439	0.66396	0.0074408	0.028737	up	sp|Q8R035|ICT1_MOUSE Peptidyl-tRNA hydrolase ICT1, mitochondrial OS=Mus musculus GN=Ict1 PE=1 SV=1//1.34622e-27
Cla005693	4131.2	2713.87	0.60621	0.0044384	0.018648	up	-//-
Cla005762	4011.47	2514.54	0.67383	0.0013056	0.0066003	up	sp|O23627|SYGM1_ARATH Glycine--tRNA ligase, mitochondrial 1 OS=Arabidopsis thaliana GN=At1g29880 PE=1 SV=1//0
Cla005772	8800.61	1179.92	2.8989	1.8994e-20	1.347e-18	up	sp|Q8GXZ3|Y5102_ARATH Serine/threonine-protein kinase At5g01020 OS=Arabidopsis thaliana GN=At5g01020 PE=1 SV=1//2.35275e-91
Cla005777	6691.99	1102.84	2.6012	1.1768e-30	1.8179e-28	up	sp|P26413|HSP70_SOYBN Heat shock 70 kDa protein OS=Glycine max GN=HSP70 PE=3 SV=1//0
Cla005827	2018.54	974.042	1.0513	0.0055397	0.022452	up	sp|Q9LKW9|NHX7_ARATH Sodium/hydrogen exchanger 7 OS=Arabidopsis thaliana GN=NHX7 PE=1 SV=1//0
Cla005829	83.7016	21.706	1.9472	0.00066687	0.0036509	up	sp|Q6NLW5|XRI1_ARATH Protein XRI1 OS=Arabidopsis thaliana GN=XRI1 PE=1 SV=2//1.33018e-15
Cla005839	573.33	333.845	0.78019	0.0034469	0.015103	up	sp|Q9LS48|SG1_ARATH protein SLOW GREEN 1, chloroplastic OS=Arabidopsis thaliana GN=SG1 PE=1 SV=1//2.99388e-127
Cla005852	6576.77	3019.23	1.1232	9.6992e-08	1.3602e-06	up	sp|Q949X9|LPR2_ARATH Multicopper oxidase LPR2 OS=Arabidopsis thaliana GN=LPR2 PE=2 SV=1//0
Cla005862	3434.86	1395.29	1.2997	2.7833e-09	5.1356e-08	up	sp|P55826|PPOC_ARATH Protoporphyrinogen oxidase 1, chloroplastic OS=Arabidopsis thaliana GN=PPOX1 PE=1 SV=1//0
Cla005871	5515.65	2234.07	1.3039	1.3158e-09	2.5632e-08	up	sp|P51819|HSP83_IPONI Heat shock protein 83 OS=Ipomoea nil GN=HSP83A PE=2 SV=1//0
Cla005882	924.446	558.695	0.72653	0.0026466	0.012119	up	-//-
Cla005894	2261.87	1130.88	1.0001	5.624e-06	5.4399e-05	up	-//-
Cla005896	2419.33	855.703	1.4994	3.5572e-11	9.0881e-10	up	sp|Q8H9D2|NQR_SOLTU NAD(P)H:quinone oxidoreductase OS=Solanum tuberosum PE=2 SV=1//8.67592e-90
Cla005898	358.147	175.82	1.0265	0.00067003	0.0036644	up	-//-
Cla005905	27.4786	0	Inf	5.7116e-06	5.5119e-05	up	sp|Q8VY22|TBL38_ARATH Protein trichome birefringence-like 38 OS=Arabidopsis thaliana GN=TBL38 PE=2 SV=1//1.16616e-141
Cla005909	1129.6	380.732	1.569	1.8185e-10	4.0842e-09	up	-//-
Cla005910	2063.24	977.031	1.0784	0.00024002	0.0015146	up	sp|Q9C826|ABA2_ARATH Xanthoxin dehydrogenase OS=Arabidopsis thaliana GN=ABA2 PE=1 SV=1//3.22833e-87
Cla005911	1087.68	298.119	1.8673	1.6232e-13	5.5675e-12	up	-//-
Cla005919	525.17	266.271	0.97989	0.00029917	0.0018249	up	sp|Q8S0G4|GPDH1_ORYSJ Probable glycerol-3-phosphate dehydrogenase [NAD(+)] 1, cytosolic OS=Oryza sativa subsp. japonica GN=Os01g0939600 PE=2 SV=1//0
Cla005923	1119.95	735.427	0.60678	0.00997	0.036365	up	-//-
Cla005925	4218	2951.98	0.51488	0.013855	0.047606	up	sp|P51132|UCRI2_TOBAC Cytochrome b-c1 complex subunit Rieske-2, mitochondrial OS=Nicotiana tabacum PE=2 SV=1//1.31684e-141
Cla005927	614.54	189.272	1.699	9.5558e-10	1.9372e-08	up	sp|Q9LSE4|CCB1_ARATH Protein COFACTOR ASSEMBLY OF COMPLEX C SUBUNIT B CCB1, chloroplastic OS=Arabidopsis thaliana GN=CCB1 PE=1 SV=1//9.89888e-100
Cla005935	1027.34	230.546	2.1558	7.5714e-09	1.3041e-07	up	sp|D1MI46|C76BA_SWEMU Geraniol 8-hydroxylase OS=Swertia mussotii GN=CYP76B10 PE=1 SV=1//4.01166e-168
Cla005936	561.284	335.069	0.74427	0.0046659	0.019461	up	sp|Q5SP67|WDR26_DANRE WD repeat-containing protein 26 OS=Danio rerio GN=wdr26 PE=1 SV=1//1.79463e-96
Cla005941	2423.03	1589.23	0.60849	0.0056321	0.022761	up	sp|Q7XJ98|KATAM_ARATH Xyloglucan galactosyltransferase KATAMARI1 OS=Arabidopsis thaliana GN=KAM1 PE=1 SV=1//0
Cla005945	4271.28	1938.71	1.1396	7.745e-06	7.219e-05	up	sp|Q38829|IAA11_ARATH Auxin-responsive protein IAA11 OS=Arabidopsis thaliana GN=IAA11 PE=1 SV=1//4.42419e-43
Cla005946	547.82	184.604	1.5693	3.4671e-06	3.5469e-05	up	sp|Q6NM73|CRRS3_ARATH Cysteine-rich repeat secretory protein 3 OS=Arabidopsis thaliana GN=CRRSP3 PE=1 SV=1//6.27895e-63
Cla005948	615.963	296.881	1.053	7.7276e-05	0.00056375	up	sp|P42620|YQJG_ECOLI Glutathionyl-hydroquinone reductase YqjG OS=Escherichia coli (strain K12) GN=yqjG PE=1 SV=1//1.7481e-66
Cla005955	189.501	62.8442	1.5924	0.0029133	0.013156	up	sp|Q9FNL7|PTR3_ARATH Protein NRT1/ PTR FAMILY 5.2 OS=Arabidopsis thaliana GN=NPF5.2 PE=2 SV=1//0
Cla005956	760.729	214.307	1.8277	9.4947e-12	2.6134e-10	up	sp|F4I443|BARD1_ARATH BRCA1-associated RING domain protein 1 OS=Arabidopsis thaliana GN=BARD1 PE=1 SV=1//2.26937e-16
Cla005974	1308.34	650.659	1.0078	1.5428e-05	0.00013397	up	sp|Q94K75|RHON1_ARATH Rho-N domain-containing protein 1, chloroplastic OS=Arabidopsis thaliana GN=RHON1 PE=1 SV=1//4.4432e-59
Cla005980	17.135	1.39214	3.6216	0.012765	0.044502	up	sp|Q9XHP0|11S2_SESIN 11S globulin seed storage protein 2 OS=Sesamum indicum PE=2 SV=1//3.49115e-136
Cla006013	300.177	150.174	0.99917	0.0017612	0.0085231	up	sp|Q54F15|NUBPL_DICDI Iron-sulfur protein NUBPL OS=Dictyostelium discoideum GN=nubpl PE=3 SV=1//9.24046e-104
Cla006015	1264.48	174.94	2.8536	8.3474e-21	6.161e-19	up	sp|O04336|WRK21_ARATH Probable WRKY transcription factor 21 OS=Arabidopsis thaliana GN=WRKY21 PE=2 SV=1//2.84415e-15
Cla006017	1265.03	790.33	0.67865	0.003352	0.014772	up	sp|Q9FRR1|PRA1E_ARATH PRA1 family protein E OS=Arabidopsis thaliana GN=PRA1E PE=1 SV=1//2.87879e-32
Cla006022	1911.26	1315.16	0.53928	0.014454	0.049272	up	sp|O22765|TRPA1_ARATH Tryptophan synthase alpha chain OS=Arabidopsis thaliana GN=TRPA1 PE=1 SV=2//1.12535e-157
Cla006024	39022.7	9693.47	2.0092	3.2565e-20	2.2455e-18	up	-//-
Cla006029	2000.69	768.32	1.3807	1.0815e-09	2.1639e-08	up	sp|Q9LY74|BQMT_ARATH 2-methyl-6-phytyl-1,4-hydroquinone methyltransferase, chloroplastic OS=Arabidopsis thaliana GN=VTE3 PE=1 SV=1//0
Cla006038	4424.04	1529.62	1.5322	1.1665e-12	3.6209e-11	up	sp|Q94A20|BI1L_ARATH BI1-like protein OS=Arabidopsis thaliana GN=At4g15470 PE=2 SV=1//7.77885e-51
Cla006046	526.625	322.97	0.70537	0.0093959	0.034681	up	sp|Q9M1W7|SKI30_ARATH F-box/kelch-repeat protein SKIP30 OS=Arabidopsis thaliana GN=SKIP30 PE=1 SV=2//0
Cla006051	1166.8	642.687	0.86037	0.00024702	0.0015524	up	sp|Q8H1F6|DGP3_ARATH DAR GTPase 3, chloroplastic OS=Arabidopsis thaliana GN=DGP3 PE=2 SV=1//1.21817e-171
Cla006060	40.5476	2.51194	4.0127	4.4466e-05	0.00034777	up	sp|Q94ID2|IPT5_ARATH Adenylate isopentenyltransferase 5, chloroplastic OS=Arabidopsis thaliana GN=IPT5 PE=1 SV=2//5.20251e-102
Cla006061	946.94	413.574	1.1951	1.374e-06	1.534e-05	up	sp|Q8S3D5|BH069_ARATH Transcription factor bHLH69 OS=Arabidopsis thaliana GN=BHLH69 PE=2 SV=2//1.37561e-11
Cla006062	1034.1	388.025	1.4142	1.2216e-08	2.0253e-07	up	-//-
Cla006063	281.294	135.92	1.0493	0.0010378	0.0053999	up	sp|A4ZDL6|GNK2_GINBI Antifungal protein ginkbilobin-2 OS=Ginkgo biloba GN=GNK2 PE=1 SV=1//3.76432e-12
Cla006064	3167.48	322.948	3.294	0.00022943	0.0014561	up	sp|Q9LS23|ALMTD_ARATH Aluminum-activated malate transporter 13 OS=Arabidopsis thaliana GN=ALMT13 PE=2 SV=1//1.76001e-85
Cla006071	6952.55	4041.33	0.78271	0.0023239	0.010843	up	-//-
Cla006083	1362.09	777.67	0.80859	0.0004522	0.0026113	up	-//-
Cla006093	2529.12	1717.38	0.55843	0.0078673	0.030115	up	sp|A4YGN0|SUCD_METS5 Succinate-semialdehyde dehydrogenase (acetylating) OS=Metallosphaera sedula (strain ATCC 51363 / DSM 5348) GN=Msed_1424 PE=1 SV=1//3.69656e-46
Cla006094	1827.97	1239.12	0.56093	0.0093484	0.034525	up	sp|A4YGN0|SUCD_METS5 Succinate-semialdehyde dehydrogenase (acetylating) OS=Metallosphaera sedula (strain ATCC 51363 / DSM 5348) GN=Msed_1424 PE=1 SV=1//1.90164e-18
Cla006097	526.414	330.892	0.66983	0.011767	0.041711	up	sp|A5B4D2|GUFP_VITVI Translation factor GUF1 homolog, chloroplastic OS=Vitis vinifera GN=VITISV_013255 PE=3 SV=1//3.90086e-101
Cla006123	234708	82921.2	1.5011	2.2623e-06	2.4131e-05	up	sp|Q94A08|RFS2_ARATH Probable galactinol--sucrose galactosyltransferase 2 OS=Arabidopsis thaliana GN=RFS2 PE=2 SV=2//0
Cla006136	5620.36	2952.24	0.92886	9.8573e-06	8.9451e-05	up	sp|Q9FLX7|NDUA5_ARATH Probable NADH dehydrogenase [ubiquinone] 1 alpha subcomplex subunit 5, mitochondrial OS=Arabidopsis thaliana GN=At5g52840 PE=1 SV=1//2.76557e-97
Cla006138	1318.01	570.079	1.2091	3.2317e-07	4.0735e-06	up	sp|Q8LG95|PP332_ARATH Pentatricopeptide repeat-containing protein At4g21190 OS=Arabidopsis thaliana GN=EMB1417 PE=2 SV=1//2.54214e-126
Cla006147	3042.56	1715.22	0.82689	0.00011644	0.0008088	up	sp|Q84WV9|QPCT_ARATH Glutaminyl-peptide cyclotransferase OS=Arabidopsis thaliana GN=QCT PE=1 SV=1//3.67868e-109
Cla006149	85257.3	11862.1	2.8455	2.0463e-39	5.1619e-37	up	sp|O49814|BCH2_CAPAN Beta-carotene hydroxylase 2, chloroplastic (Fragment) OS=Capsicum annuum GN=CA2 PE=2 SV=1//2.1834e-127
Cla006150	4008.06	2740.22	0.54861	0.0087273	0.032664	up	-//-
Cla006153	1813.96	889.172	1.0286	5.7272e-06	5.5216e-05	up	sp|O31634|YJCL_BACSU Uncharacterized membrane protein YjcL OS=Bacillus subtilis (strain 168) GN=yjcL PE=4 SV=1//2.80457e-34
Cla006159	16444.3	4062.32	2.0172	3.8006e-21	2.8798e-19	up	-//-
Cla006162	889.775	442.514	1.0077	4.5595e-05	0.00035465	up	sp|Q94G16|TATB_PEA Sec-independent protein translocase protein TATB, chloroplastic OS=Pisum sativum GN=TATB PE=1 SV=1//4.38499e-61
Cla006166	2901.3	1594.36	0.86372	8.1957e-05	0.00059347	up	-//-
Cla006181	691.649	224.43	1.6238	0.0002921	0.0017927	up	sp|P93788|REMO_SOLTU Remorin OS=Solanum tuberosum PE=1 SV=1//1.98376e-28
Cla006187	503.628	276.612	0.86449	0.0015629	0.0076904	up	sp|Q9LS72|PP261_ARATH Pentatricopeptide repeat-containing protein At3g29230 OS=Arabidopsis thaliana GN=PCMP-E27 PE=2 SV=1//5.62045e-15
Cla006193	632.604	194.144	1.7042	2.2275e-06	2.3789e-05	up	-//-
Cla006196	8959.36	2181.52	2.0381	8.7794e-22	7.112e-20	up	sp|Q9XH44|CET1_TOBAC CEN-like protein 1 OS=Nicotiana tabacum GN=CET1 PE=2 SV=1//4.30646e-46
Cla006199	1639.16	981.61	0.73973	0.00077695	0.0041812	up	sp|Q9LYP1|RBL3_ARATH RHOMBOID-like protein 3 OS=Arabidopsis thaliana GN=RBL3 PE=2 SV=1//2.25165e-95
Cla006216	33.6222	2.74077	3.6168	0.0065996	0.026038	up	-//-
Cla006227	48742.4	107.693	8.8221	2.193e-204	4.3702e-200	up	sp|Q39111|GAOX2_ARATH Gibberellin 20 oxidase 2 OS=Arabidopsis thaliana GN=GA20OX2 PE=2 SV=1//5.91279e-144
Cla006249	1776.19	939.22	0.91925	4.6429e-05	0.00036072	up	sp|Q8GW78|CLP41_ARATH Clp protease-related protein At4g12060, chloroplastic OS=Arabidopsis thaliana GN=At4g12060 PE=1 SV=1//1.87726e-74
Cla006258	373.76	97.4222	1.9398	1.205e-09	2.3751e-08	up	sp|F4KDA6|LPA2_ARATH Protein LOW PSII ACCUMULATION 2, chloroplastic OS=Arabidopsis thaliana GN=LPA2 PE=1 SV=1//5.54132e-54
Cla006261	430.526	232.708	0.88758	0.0018899	0.0090749	up	sp|O24464|KCY_PRUAR UMP-CMP kinase OS=Prunus armeniaca PE=2 SV=1//4.7171e-104
Cla006266	2302.83	858.558	1.4234	0.00066198	0.0036321	up	sp|P17407|21KD_DAUCA 21 kDa protein OS=Daucus carota PE=2 SV=1//3.41452e-46
Cla006269	1717.49	283.15	2.6007	1.6014e-20	1.1439e-18	up	sp|Q8VXX5|SKS1_ARATH Monocopper oxidase-like protein SKS1 OS=Arabidopsis thaliana GN=SKS1 PE=1 SV=1//0
Cla006304	1330.22	642.988	1.0488	7.3564e-06	6.8922e-05	up	-//-
Cla006306	2673.05	1732.77	0.6254	0.0032981	0.01457	up	sp|Q9LXV5|NFYA1_ARATH Nuclear transcription factor Y subunit A-1 OS=Arabidopsis thaliana GN=NFYA1 PE=2 SV=1//2.94882e-47
Cla006312	5956.93	1783.29	1.74	5.016e-16	2.33e-14	up	sp|Q56YN3|NADK1_ARATH NAD(H) kinase 1 OS=Arabidopsis thaliana GN=NADK1 PE=1 SV=2//0
Cla006317	433.053	119.256	1.8605	0.008682	0.032546	up	-//-
Cla006318	1429.58	816.762	0.80761	0.00036421	0.0021627	up	sp|Q9VZD8|THUM1_DROME THUMP domain-containing protein 1 homolog OS=Drosophila melanogaster GN=CG15014 PE=1 SV=2//1.00409e-25
Cla006320	463.34	189.148	1.2926	4.3245e-06	4.2896e-05	up	sp|P52408|E13B_PRUPE Glucan endo-1,3-beta-glucosidase, basic isoform OS=Prunus persica GN=GNS1 PE=3 SV=1//2.909e-125
Cla006331	880.098	382.07	1.2038	1.443e-06	1.6038e-05	up	sp|O80934|Y2766_ARATH Uncharacterized protein At2g37660, chloroplastic OS=Arabidopsis thaliana GN=At2g37660 PE=2 SV=2//7.4669e-19
Cla006366	9524.1	3553.14	1.4225	0.0066248	0.026122	up	sp|A5JTQ3|XYL2_MEDSV Beta-xylosidase/alpha-L-arabinofuranosidase 2 OS=Medicago sativa subsp. varia GN=Xyl2 PE=2 SV=1//0
Cla006379	1738.48	436.929	1.9924	2.0312e-09	3.8478e-08	up	sp|F8WKW1|UGT2_GARJA 7-deoxyloganetin glucosyltransferase OS=Gardenia jasminoides GN=UGT85A24 PE=1 SV=1//0
Cla006403	222.364	115.428	0.94593	0.0069093	0.027072	up	sp|Q8VYI9|NLTL5_ARATH Non-specific lipid-transfer protein-like protein At5g64080 OS=Arabidopsis thaliana GN=At5g64080 PE=1 SV=1//3.01112e-36
Cla006408	436.209	198.985	1.1324	9.5665e-05	0.00067916	up	sp|A4FVI0|ZSWM7_DANRE Zinc finger SWIM domain-containing protein 7 OS=Danio rerio GN=zswim7 PE=2 SV=2//1.1634e-19
Cla006411	993.761	481.586	1.0451	1.3336e-05	0.00011728	up	sp|O64818|Y2309_ARATH Uncharacterized protein At2g23090 OS=Arabidopsis thaliana GN=At2g23090 PE=1 SV=1//8.96522e-11
Cla006412	434.794	210.143	1.049	0.00025594	0.0016009	up	sp|Q54FR4|PX24D_DICDI PXMP2/4 family protein 4 OS=Dictyostelium discoideum GN=DDB_G0290631 PE=3 SV=1//2.56115e-25
Cla006432	476.092	130.718	1.8648	0.0032738	0.014478	up	sp|Q5EFU4|CRD1_HORVU Magnesium-protoporphyrin IX monomethyl ester [oxidative] cyclase, chloroplastic OS=Hordeum vulgare GN=CRD1 PE=1 SV=1//1.10302e-30
Cla006433	891461	74335.7	3.584	3.8747e-09	7.026e-08	up	-//-
Cla006441	33326.2	13971.4	1.2542	1.2292e-09	2.4133e-08	up	-//-
Cla006442	2867.55	40.3556	6.1509	6.0744e-38	1.4076e-35	up	sp|P93039|NAT4_ARATH Nucleobase-ascorbate transporter 4 OS=Arabidopsis thaliana GN=NAT4 PE=2 SV=2//0
Cla006446	1065.64	477.037	1.1596	0.00095108	0.0049983	up	sp|Q9C942|CSE_ARATH Caffeoylshikimate esterase OS=Arabidopsis thaliana GN=CSE PE=1 SV=1//2.24589e-133
Cla006447	2948.19	1585.63	0.89478	2.83e-05	0.00023256	up	sp|Q8LBK6|GRS15_ARATH Monothiol glutaredoxin-S15, mitochondrial OS=Arabidopsis thaliana GN=GRXS15 PE=1 SV=2//1.31648e-69
Cla006449	85.8368	8.47169	3.3409	0.014579	0.049597	up	-//-
Cla006454	813.853	314.545	1.3715	8.1308e-08	1.1607e-06	up	sp|Q9LMU1|EGY3_ARATH Probable zinc metallopeptidase EGY3, chloroplastic OS=Arabidopsis thaliana GN=EGY3 PE=2 SV=1//0
Cla006457	438.889	114.222	1.942	2.7241e-10	5.9199e-09	up	-//-
Cla006458	169.459	48.6331	1.8009	1.5373e-05	0.00013354	up	-//-
Cla006465	4576.42	2758.01	0.7306	0.0034916	0.015262	up	-//-
Cla006479	5436.06	954.707	2.5094	4.1002e-09	7.3945e-08	up	sp|Q9FME8|OPT4_ARATH Oligopeptide transporter 4 OS=Arabidopsis thaliana GN=OPT4 PE=1 SV=1//0
Cla006486	1811.06	982.137	0.88284	8.3146e-05	0.00060143	up	sp|Q9FGF0|PGML1_ARATH Phosphoglycerate mutase-like protein 1 OS=Arabidopsis thaliana GN=At5g64460 PE=2 SV=1//1.86125e-155
Cla006489	3953.37	1683.19	1.2319	9.4173e-09	1.5931e-07	up	sp|P93732|PIP_ARATH Proline iminopeptidase OS=Arabidopsis thaliana GN=PIP PE=2 SV=3//0
Cla006491	1761.18	1184.85	0.57184	0.010212	0.037028	up	sp|Q9FM04|GDL88_ARATH GDSL esterase/lipase At5g62930 OS=Arabidopsis thaliana GN=At5g62930 PE=2 SV=3//1.03652e-120
Cla006505	202.015	103.391	0.96634	0.0062731	0.024932	up	sp|Q7ZZ00|ZN511_DANRE Zinc finger protein 511 OS=Danio rerio GN=znf511 PE=2 SV=1//9.41205e-27
Cla006506	624.231	309.413	1.0125	0.00010872	0.00076102	up	sp|P30155|RK27_TOBAC 50S ribosomal protein L27, chloroplastic OS=Nicotiana tabacum GN=RPL27 PE=1 SV=1//2.53537e-84
Cla006507	529.061	326.05	0.69834	0.0093988	0.034681	up	-//-
Cla006513	2271.05	1472.91	0.62468	0.012947	0.045052	up	sp|Q9LK32|Y3721_ARATH Uncharacterized protein At3g27210 OS=Arabidopsis thaliana GN=Y-2 PE=1 SV=1//6.85298e-12
Cla006525	1067.72	649.521	0.71708	0.0027102	0.012376	up	sp|Q8W575|CSN3_ARATH COP9 signalosome complex subunit 3 OS=Arabidopsis thaliana GN=CSN3 PE=1 SV=2//2.14925e-152
Cla006526	5363.15	1659.22	1.6926	2.373e-15	1.0061e-13	up	-//-
Cla006529	22730.4	12771.9	0.83165	3.7499e-05	0.00029951	up	sp|Q9LK22|PUX1_ARATH Plant UBX domain-containing protein 1 OS=Arabidopsis thaliana GN=PUX1 PE=1 SV=1//4.34888e-76
Cla006530	8648.45	4444.98	0.96027	3.1152e-06	3.2116e-05	up	sp|P34783|G3P_ATRNU Glyceraldehyde-3-phosphate dehydrogenase OS=Atriplex nummularia PE=2 SV=1//0
Cla006544	2885.88	1534.5	0.91124	2.4211e-05	0.00020196	up	sp|O22160|TL15A_ARATH Thylakoid lumenal 15 kDa protein 1, chloroplastic OS=Arabidopsis thaliana GN=At2g44920 PE=1 SV=2//5.96564e-100
Cla006553	7812.47	5480.85	0.51138	0.013343	0.046208	up	sp|O04015|P5CS_ACTDE Delta-1-pyrroline-5-carboxylate synthase OS=Actinidia deliciosa PE=2 SV=1//0
Cla006582	2531.8	1334.76	0.92359	1.5149e-05	0.00013183	up	sp|Q9FFK3|EGY2_ARATH Probable zinc metalloprotease EGY2, chloroplastic OS=Arabidopsis thaliana GN=EGY2 PE=2 SV=1//0
Cla006583	2345.01	1450.59	0.69296	0.001311	0.0066223	up	sp|Q9C777|YIPL3_ARATH Protein yippee-like At3g11230 OS=Arabidopsis thaliana GN=At3g11230 PE=2 SV=1//3.0871e-67
Cla006584	3526.13	1632.75	1.1108	2.2693e-07	2.9616e-06	up	sp|Q9C776|ATE2_ARATH Arginyl-tRNA--protein transferase 2 OS=Arabidopsis thaliana GN=ATE2 PE=2 SV=1//0
Cla006604	3371.89	1348.1	1.3226	1.5837e-09	3.0434e-08	up	sp|O80920|PYL4_ARATH Abscisic acid receptor PYL4 OS=Arabidopsis thaliana GN=PYL4 PE=1 SV=1//1.06361e-67
Cla006607	1668.19	633.828	1.3961	1.8506e-09	3.5324e-08	up	sp|Q06881|BCCP_NOSS1 Biotin carboxyl carrier protein of acetyl-CoA carboxylase OS=Nostoc sp. (strain PCC 7120 / UTEX 2576) GN=accB PE=1 SV=2//6.77728e-09
Cla006620	57.2385	3.14265	4.1869	8.7742e-05	0.00063123	up	-//-
Cla006639	10576.1	5208.58	1.0219	0.0095907	0.035289	up	sp|Q3EBF7|SLD2_ARATH Delta(8)-fatty-acid desaturase 2 OS=Arabidopsis thaliana GN=SLD2 PE=1 SV=1//0
Cla006650	1399.98	676.971	1.0482	6.7816e-06	6.4067e-05	up	sp|Q9LK39|AAE16_ARATH Probable acyl-activating enzyme 16, chloroplastic OS=Arabidopsis thaliana GN=AAE16 PE=2 SV=1//0
Cla006692	501.797	20.7927	4.593	1.5694e-06	1.7327e-05	up	sp|O23090|BH014_ARATH Transcription factor bHLH14 OS=Arabidopsis thaliana GN=BHLH14 PE=2 SV=1//1.52886e-62
Cla006693	139.071	0.304475	8.8353	0.00011202	0.00078053	up	sp|O23090|BH014_ARATH Transcription factor bHLH14 OS=Arabidopsis thaliana GN=BHLH14 PE=2 SV=1//2.15399e-58
Cla006695	176.113	83.8248	1.0711	0.0053098	0.021652	up	-//-
Cla006696	20.3167	0	Inf	0.00013837	0.00094368	up	sp|Q8LPG9|IQD14_ARATH Protein IQ-DOMAIN 14 OS=Arabidopsis thaliana GN=IQD14 PE=1 SV=1//1.34248e-16
Cla006711	3317.75	2157.46	0.62087	0.0039009	0.016728	up	sp|Q9C5D6|CAAT9_ARATH Cationic amino acid transporter 9, chloroplastic OS=Arabidopsis thaliana GN=CAT9 PE=2 SV=1//0
Cla006736	21823.1	6160.14	1.8248	4.1143e-07	5.0767e-06	up	sp|Q8S8N4|Y2685_ARATH Probably inactive receptor-like protein kinase At2g46850 OS=Arabidopsis thaliana GN=At2g46850 PE=3 SV=1//0
Cla006738	5900.08	996.755	2.5654	1.1265e-30	1.7538e-28	up	sp|Q6R0H1|LHY_ARATH Protein LHY OS=Arabidopsis thaliana GN=LHY PE=1 SV=2//3.19553e-49
Cla006739	389.865	73.1353	2.4143	2.5006e-13	8.4461e-12	up	sp|P92973|CCA1_ARATH Protein CCA1 OS=Arabidopsis thaliana GN=CCA1 PE=1 SV=1//2.11166e-08
Cla006743	2088	806.279	1.3728	1.0057e-09	2.0223e-08	up	sp|O24457|ODPA3_ARATH Pyruvate dehydrogenase E1 component subunit alpha-3, chloroplastic OS=Arabidopsis thaliana GN=PDH-E1 ALPHA PE=2 SV=1//0
Cla006756	627.266	355.952	0.8174	0.0014922	0.0073879	up	sp|Q9M3H5|HMA1_ARATH Probable cadmium/zinc-transporting ATPase HMA1, chloroplastic OS=Arabidopsis thaliana GN=HMA1 PE=2 SV=2//7.81672e-65
Cla006757	1510.25	695.313	1.1191	1.2299e-06	1.387e-05	up	sp|Q9M3H5|HMA1_ARATH Probable cadmium/zinc-transporting ATPase HMA1, chloroplastic OS=Arabidopsis thaliana GN=HMA1 PE=2 SV=2//5.0685e-67
Cla006761	7138.46	4641.06	0.62116	0.0027163	0.012396	up	sp|Q9FDW1|MYB44_ARATH Transcription factor MYB44 OS=Arabidopsis thaliana GN=MYB44 PE=2 SV=1//1.40329e-87
Cla006772	1110	732.024	0.6006	0.0087773	0.032811	up	sp|O22176|WRK15_ARATH Probable WRKY transcription factor 15 OS=Arabidopsis thaliana GN=WRKY15 PE=2 SV=1//5.70033e-73
Cla006786	852.836	362.338	1.2349	0.00027514	0.0017009	up	sp|O24629|SIGA_ARATH RNA polymerase sigma factor sigA OS=Arabidopsis thaliana GN=SIGA PE=1 SV=1//0
Cla006789	704.522	165.762	2.0875	3.6197e-13	1.1943e-11	up	sp|Q9LF50|MEX1_ARATH Maltose excess protein 1, chloroplastic OS=Arabidopsis thaliana GN=MEX1 PE=2 SV=2//1.40749e-134
Cla006800	822.962	90.35	3.1872	2.7285e-25	2.9551e-23	up	sp|Q42602|C89A2_ARATH Cytochrome P450 89A2 OS=Arabidopsis thaliana GN=CYP89A2 PE=2 SV=2//2.93007e-116
Cla006801	277.28	158.658	0.80542	0.011859	0.041952	up	-//-
Cla006823	500.642	315.431	0.66646	0.011175	0.039923	up	sp|O81884|GALDH_ARATH L-galactose dehydrogenase OS=Arabidopsis thaliana GN=LGALDH PE=1 SV=1//0
Cla006828	3311.5	1594.74	1.0542	1.1553e-06	1.311e-05	up	sp|Q93V66|FAX1_ARATH Protein FATTY ACID EXPORT 1, chloroplastic OS=Arabidopsis thaliana GN=FAX1 PE=2 SV=1//2.33583e-48
Cla006834	1384.44	720.928	0.94137	5.6735e-05	0.00043123	up	sp|Q5R8D8|DNJC7_PONAB DnaJ homolog subfamily C member 7 OS=Pongo abelii GN=DNAJC7 PE=2 SV=1//1.77572e-35
Cla006838	20064.5	6119.23	1.7132	3.6031e-16	1.7137e-14	up	sp|Q8W4L0|CML49_ARATH Probable calcium-binding protein CML49 OS=Arabidopsis thaliana GN=CML49 PE=2 SV=1//2.66701e-98
Cla006876	3573.82	2247.84	0.66893	0.0018416	0.0088708	up	sp|Q9SI09|XERIC_ARATH Probable E3 ubiquitin-protein ligase XERICO OS=Arabidopsis thaliana GN=XERICO PE=1 SV=1//1.98303e-48
Cla006882	47.6651	3.12099	3.9329	1.3127e-05	0.0001157	up	sp|Q8GUM4|Y3739_ARATH Uncharacterized membrane protein At3g27390 OS=Arabidopsis thaliana GN=At3g27390 PE=1 SV=2//1.52556e-131
Cla006885	5198.49	1324.79	1.9723	2.1786e-12	6.5482e-11	up	sp|Q9LMA1|FMO1_ARATH Probable flavin-containing monooxygenase 1 OS=Arabidopsis thaliana GN=FMO1 PE=2 SV=1//4.46299e-15
Cla006886	10506.3	2301.23	2.1908	2.7586e-24	2.6948e-22	up	sp|Q9LMA1|FMO1_ARATH Probable flavin-containing monooxygenase 1 OS=Arabidopsis thaliana GN=FMO1 PE=2 SV=1//4.09402e-78
Cla006887	89.6856	31.4723	1.5108	0.0042869	0.018095	up	-//-
Cla006895	691.867	168.696	2.0361	1.8825e-13	6.4126e-12	up	sp|P48279|YCF39_CYAPA Uncharacterized protein ycf39 OS=Cyanophora paradoxa GN=ycf39 PE=3 SV=1//5.65678e-117
Cla006906	2246.44	650.091	1.7889	4.7008e-15	1.9157e-13	up	sp|Q9FIW5|NAC94_ARATH Putative NAC domain-containing protein 94 OS=Arabidopsis thaliana GN=ANAC094 PE=3 SV=1//1.07929e-49
Cla006918	1631.7	528.045	1.6276	4.8437e-12	1.3889e-10	up	sp|Q3EBZ2|SKI23_ARATH F-box protein SKIP23 OS=Arabidopsis thaliana GN=SKIP23 PE=1 SV=1//1.47024e-85
Cla006921	3155.24	2076.3	0.60374	0.0042801	0.018075	up	sp|Q8L7K9|MAO2_ARATH NAD-dependent malic enzyme 2, mitochondrial OS=Arabidopsis thaliana GN=NAD-ME2 PE=1 SV=1//0
Cla006926	1644.46	762.421	1.109	1.3309e-06	1.49e-05	up	sp|Q9LQ73|PX11C_ARATH Peroxisomal membrane protein 11C OS=Arabidopsis thaliana GN=PEX11C PE=1 SV=1//7.15496e-130
Cla006940	1430.76	696.074	1.0395	6.4515e-06	6.1339e-05	up	sp|P93733|PLDB1_ARATH Phospholipase D beta 1 OS=Arabidopsis thaliana GN=PLDBETA1 PE=2 SV=4//0
Cla006949	1192.05	760.61	0.64822	0.0050447	0.020775	up	-//-
Cla006961	3820.47	1926.94	0.98744	2.6423e-06	2.7713e-05	up	sp|Q40316|VESTR_MEDSA Vestitone reductase OS=Medicago sativa PE=1 SV=1//2.00931e-117
Cla006962	152.234	40.3909	1.9142	9.9254e-06	9.0029e-05	up	sp|Q40316|VESTR_MEDSA Vestitone reductase OS=Medicago sativa PE=1 SV=1//7.51601e-143
Cla006963	308.183	144.82	1.0895	0.0058254	0.02341	up	-//-
Cla006967	5395.82	3640.09	0.56787	0.005881	0.023609	up	sp|Q38997|KIN10_ARATH SNF1-related protein kinase catalytic subunit alpha KIN10 OS=Arabidopsis thaliana GN=KIN10 PE=1 SV=2//0
Cla006975	16111.4	8072.56	0.99698	8.782e-07	1.0211e-05	up	sp|O49621|MLO1_ARATH MLO-like protein 1 OS=Arabidopsis thaliana GN=MLO1 PE=1 SV=1//0
Cla006978	1078.64	606.764	0.83001	0.00049865	0.0028481	up	sp|O22056|SIGB_ARATH RNA polymerase sigma factor sigB OS=Arabidopsis thaliana GN=SIGB PE=2 SV=2//0
Cla006980	138.886	18.8137	2.884	6.6331e-09	1.1565e-07	up	-//-
Cla006981	11369.2	3370.86	1.7539	1.0116e-16	5.0147e-15	up	-//-
Cla006997	3192.08	571.948	2.4805	5.7618e-08	8.5305e-07	up	sp|O04905|KCY3_ARATH UMP-CMP kinase 3 OS=Arabidopsis thaliana GN=UMK3 PE=1 SV=1//4.04928e-113
Cla006998	651.355	17.9994	5.1774	7.45e-49	3.6211e-46	up	sp|Q9ZVJ5|SGGP_ARATH Haloacid dehalogenase-like hydrolase domain-containing protein Sgpp OS=Arabidopsis thaliana GN=SGPP PE=1 SV=2//4.21082e-82
Cla006999	2757.49	468.436	2.5574	4.6368e-08	7.0108e-07	up	-//-
Cla007006	912.206	347.093	1.394	3.5576e-08	5.4661e-07	up	sp|A5GNB0|CH10_SYNPW 10 kDa chaperonin OS=Synechococcus sp. (strain WH7803) GN=groS PE=3 SV=1//2.36893e-11
Cla007008	2450.43	1324.24	0.88787	9.2195e-05	0.00065922	up	sp|Q9M1B9|SCRK4_ARATH Probable fructokinase-4 OS=Arabidopsis thaliana GN=At3g59480 PE=2 SV=1//0
Cla007031	56.6289	16.6171	1.7689	0.0074617	0.0288	up	sp|B7JW76|TIG_CYAP8 Trigger factor OS=Cyanothece sp. (strain PCC 8801) GN=tig PE=3 SV=1//1.85788e-06
Cla007057	1231.87	612.702	1.0076	1.4935e-05	0.0001302	up	sp|Q9Y7Q7|DENN_SCHPO DENN domain-containing protein C297.05 OS=Schizosaccharomyces pombe (strain 972 / ATCC 24843) GN=SPCC297.05 PE=1 SV=1//3.20136e-10
Cla007058	1153.79	710.662	0.69915	0.0031746	0.014129	up	sp|Q6P829|NOSIP_XENTR Nitric oxide synthase-interacting protein OS=Xenopus tropicalis GN=nosip PE=2 SV=1//2.04536e-39
Cla007062	487.99	116.299	2.069	7.4075e-12	2.0646e-10	up	sp|Q0JG75|PSB28_ORYSJ Photosystem II reaction center PSB28 protein, chloroplastic OS=Oryza sativa subsp. japonica GN=PSB28 PE=2 SV=2//9.57975e-70
Cla007063	682.666	328.567	1.055	4.0722e-05	0.00032241	up	-//-
Cla007073	5132.04	2816.58	0.86559	3.7251e-05	0.00029801	up	sp|O82662|SUCB_ARATH Succinyl-CoA ligase [ADP-forming] subunit beta, mitochondrial OS=Arabidopsis thaliana GN=At2g20420 PE=1 SV=1//0
Cla007090	2387.68	1608.81	0.56961	0.0084302	0.0318	up	sp|Q67YC9|Y4141_ARATH Uncharacterized protein At4g14100 OS=Arabidopsis thaliana GN=At4g14100 PE=2 SV=1//4.91559e-93
Cla007091	1505.51	652.602	1.206	1.4828e-07	2.0061e-06	up	-//-
Cla007101	47515.2	29791.5	0.67349	0.00093567	0.0049289	up	sp|Q42679|DCAM_CATRO S-adenosylmethionine decarboxylase proenzyme OS=Catharanthus roseus GN=SAMDC PE=1 SV=1//5.5402e-174
Cla007110	328.858	176.12	0.90091	0.003933	0.016834	up	-//-
Cla007123	1677.68	580.997	1.5299	6.3861e-11	1.575e-09	up	sp|Q94C60|SPT42_ARATH Transcription elongation factor SPT4 homolog 2 OS=Arabidopsis thaliana GN=At5g63670 PE=2 SV=1//1.1727e-64
Cla007150	308.214	12.2804	4.6495	4.5996e-13	1.5101e-11	up	sp|P12858|G3PA_PEA Glyceraldehyde-3-phosphate dehydrogenase A, chloroplastic OS=Pisum sativum GN=GAPA PE=2 SV=2//0
Cla007156	1268.15	855.33	0.56818	0.011928	0.042169	up	-//-
Cla007168	928.365	520.496	0.8348	0.00052165	0.0029608	up	sp|Q8L4R0|TGD1_ARATH Protein TRIGALACTOSYLDIACYLGLYCEROL 1, chloroplastic OS=Arabidopsis thaliana GN=TGD1 PE=1 SV=1//4.05084e-168
Cla007209	3487.76	2306.41	0.59665	0.0046536	0.019421	up	sp|Q9ZW74|PUX11_ARATH Plant UBX domain-containing protein 11 OS=Arabidopsis thaliana GN=PUX11 PE=1 SV=2//3.1014e-14
Cla007219	4782.35	2173.23	1.1379	5.4547e-07	6.584e-06	up	-//-
Cla007229	2369.07	1330.92	0.83189	0.00015221	0.0010233	up	sp|Q9LYN6|Y3565_ARATH Probable inactive receptor-like protein kinase At3g56050 OS=Arabidopsis thaliana GN=At3g56050 PE=2 SV=1//9.66239e-113
Cla007232	351.674	15.5632	4.498	6.9754e-23	6.2056e-21	up	sp|Q9S7T7|SCC11_ARATH Sister chromatid cohesion 1 protein 1 OS=Arabidopsis thaliana GN=SYN1 PE=2 SV=2//2.13128e-31
Cla007239	9932.58	7013.38	0.50206	0.012602	0.044027	up	sp|Q948P6|FRI3_SOYBN Ferritin-3, chloroplastic OS=Glycine max PE=2 SV=1//7.0995e-120
Cla007255	9914.59	5913.28	0.74559	0.00023468	0.0014861	up	sp|Q9LYN0|PR1B1_ARATH PRA1 family protein B1 OS=Arabidopsis thaliana GN=PRA1B1 PE=1 SV=1//3.07682e-57
Cla007256	887.569	216.766	2.0337	8.6932e-15	3.4102e-13	up	-//-
Cla007259	1641.15	53.8426	4.9298	4.678e-10	9.8544e-09	up	sp|P83326|PMEI_ACTDE Pectinesterase inhibitor OS=Actinidia deliciosa GN=PMEI PE=1 SV=2//4.91306e-26
Cla007260	4030.07	2693.8	0.58116	0.0055878	0.022619	up	sp|F4IH31|CAN2_ARATH Staphylococcal-like nuclease CAN2 OS=Arabidopsis thaliana GN=CAN2 PE=1 SV=1//2.30881e-175
Cla007265	7762.74	3350.48	1.2122	0.0015281	0.0075376	up	sp|Q6DEL1|S38A7_DANRE Putative sodium-coupled neutral amino acid transporter 7 OS=Danio rerio GN=slc38a7 PE=2 SV=1//3.09176e-16
Cla007271	3753.73	905.628	2.0513	3.6277e-20	2.4843e-18	up	sp|Q9SRK5|LSF2_ARATH Phosphoglucan phosphatase LSF2, chloroplastic OS=Arabidopsis thaliana GN=LSF2 PE=1 SV=1//1.44941e-132
Cla007272	3099.17	1470.22	1.0759	6.4119e-07	7.6239e-06	up	sp|Q42967|DCUP_TOBAC Uroporphyrinogen decarboxylase, chloroplastic OS=Nicotiana tabacum GN=DCUP PE=1 SV=1//0
Cla007286	19019	11704.8	0.70034	0.00052495	0.0029761	up	sp|Q8VXZ7|AGAL3_ARATH Alpha-galactosidase 3 OS=Arabidopsis thaliana GN=AGAL3 PE=1 SV=1//0
Cla007290	881.002	371.102	1.2473	5.0766e-07	6.1499e-06	up	sp|Q87JZ5|Y4103_VIBPA Macro domain-containing protein VPA0103 OS=Vibrio parahaemolyticus serotype O3:K6 (strain RIMD 2210633) GN=VPA0103 PE=3 SV=1//4.88443e-43
Cla007310	196.426	61.3113	1.6798	2.2525e-05	0.00018876	up	-//-
Cla007311	5490.32	2236.92	1.2954	1.4278e-09	2.7651e-08	up	sp|Q9ASX5|Y5520_ARATH Uncharacterized aarF domain-containing protein kinase At5g05200, chloroplastic OS=Arabidopsis thaliana GN=At5g05200 PE=2 SV=1//0
Cla007315	934.238	620.67	0.58996	0.01259	0.044	up	sp|P26357|TBP_SOLTU TATA-box-binding protein OS=Solanum tuberosum GN=TBP PE=2 SV=1//4.25646e-32
Cla007323	1188.21	563.432	1.0765	4.5801e-06	4.5207e-05	up	sp|Q9C578|RCL1_ARATH Probable RNA 3&apos;-terminal phosphate cyclase-like protein OS=Arabidopsis thaliana GN=At5g22100 PE=2 SV=1//9.62658e-158
Cla007357	2151.66	790.381	1.4448	1.2543e-10	2.8997e-09	up	sp|O81020|NPC2_ARATH Non-specific phospholipase C2 OS=Arabidopsis thaliana GN=NPC2 PE=2 SV=1//0
Cla007386	9766.21	4835.55	1.0141	9.6593e-07	1.1127e-05	up	-//-
Cla007388	1706.88	678.033	1.3319	7.1405e-09	1.2374e-07	up	sp|Q9LPZ1|MORF9_ARATH Multiple organellar RNA editing factor 9, chloroplastic OS=Arabidopsis thaliana GN=MORF9 PE=1 SV=1//1.08252e-96
Cla007398	21219.4	4148.32	2.3548	3.0027e-28	3.8113e-26	up	sp|O82150|FTSH_TOBAC ATP-dependent zinc metalloprotease FTSH, chloroplastic OS=Nicotiana tabacum GN=FTSH PE=2 SV=2//0
Cla007407	1666.2	1057.48	0.65594	0.0035397	0.015429	up	sp|Q9QUR6|PPCE_MOUSE Prolyl endopeptidase OS=Mus musculus GN=Prep PE=2 SV=1//0
Cla007418	789.782	270.321	1.5468	0.001164	0.0059602	up	sp|Q2MHE4|HT1_ARATH Serine/threonine-protein kinase HT1 OS=Arabidopsis thaliana GN=HT1 PE=1 SV=1//5.20944e-80
Cla007419	16127.9	3383.59	2.2529	2.2368e-09	4.2012e-08	up	sp|P42699|PLAS2_ARATH Plastocyanin major isoform, chloroplastic OS=Arabidopsis thaliana GN=DRT112 PE=1 SV=2//2.88372e-78
Cla007424	12100.8	3160.19	1.937	9.3351e-20	6.1599e-18	up	sp|Q8RWL2|CDPKT_ARATH Calcium-dependent protein kinase 29 OS=Arabidopsis thaliana GN=CPK29 PE=2 SV=2//0
Cla007449	650.057	279.4	1.2182	3.3485e-06	3.4325e-05	up	sp|Q84VQ4|NDHU_ARATH NAD(P)H-quinone oxidoreductase subunit U, chloroplastic OS=Arabidopsis thaliana GN=ndhU PE=1 SV=1//1.19232e-43
Cla007460	347.634	172.226	1.0133	0.00081946	0.0043922	up	sp|Q9CAH1|Y1725_ARATH Putative receptor-like protein kinase At1g72540 OS=Arabidopsis thaliana GN=At1g72540 PE=2 SV=1//2.35426e-138
Cla007461	2193.05	1016.19	1.1098	7.5989e-07	8.9499e-06	up	sp|O04714|GCR1_ARATH G-protein coupled receptor 1 OS=Arabidopsis thaliana GN=GCR1 PE=1 SV=1//1.06699e-180
Cla007462	14323.7	6447.44	1.1516	0.00067356	0.0036815	up	-//-
Cla007466	107.569	26.2528	2.0347	6.1722e-05	0.00046363	up	sp|Q5QJC4|DCR1A_CHICK DNA cross-link repair 1A protein OS=Gallus gallus GN=DCLRE1A PE=1 SV=1//7.57341e-74
Cla007500	138.03	32.2897	2.0958	3.8601e-06	3.8883e-05	up	sp|Q38909|XTH28_ARATH Probable xyloglucan endotransglucosylase/hydrolase protein 28 OS=Arabidopsis thaliana GN=XTH28 PE=2 SV=1//9.83796e-116
Cla007501	28.8222	2.55555	3.4955	0.0015696	0.0077211	up	sp|Q8LDS2|XTH27_ARATH Probable xyloglucan endotransglucosylase/hydrolase protein 27 OS=Arabidopsis thaliana GN=XTH27 PE=2 SV=2//6.79912e-27
Cla007513	1134.05	502.592	1.174	9.3625e-07	1.081e-05	up	sp|Q9SKZ5|FBT1_ARATH Folate-biopterin transporter 1, chloroplastic OS=Arabidopsis thaliana GN=At2g32040 PE=1 SV=2//0
Cla007518	2664.62	1112.43	1.2602	1.1008e-08	1.8404e-07	up	sp|Q8GYD9|SDE3_ARATH Probable RNA helicase SDE3 OS=Arabidopsis thaliana GN=SDE3 PE=1 SV=1//0
Cla007519	2093.41	631.739	1.7285	6.7341e-14	2.4007e-12	up	sp|O23714|PSB2A_ARATH Proteasome subunit beta type-2-A OS=Arabidopsis thaliana GN=PBD1 PE=1 SV=1//1.9236e-134
Cla007536	61.4895	6.25276	3.2978	1.1442e-05	0.00010216	up	sp|O23320|CML8_ARATH Calmodulin-like protein 8 OS=Arabidopsis thaliana GN=CML8 PE=2 SV=1//6.73948e-09
Cla007571	1443.57	934.314	0.62766	0.01029	0.037256	up	-//-
Cla007587	15310.1	8732.57	0.81001	7.5513e-05	0.00055324	up	sp|O48905|MDHC_MEDSA Malate dehydrogenase, cytoplasmic OS=Medicago sativa GN=CMDH PE=2 SV=1//0
Cla007589	1124.65	588.083	0.93538	0.000102	0.00071976	up	sp|P13744|11SB_CUCMA 11S globulin subunit beta OS=Cucurbita maxima PE=1 SV=1//0
Cla007591	9265.56	6403.94	0.53292	0.010383	0.037546	up	sp|Q2LZZ7|TRC_DROPS Serine/threonine-protein kinase tricorner OS=Drosophila pseudoobscura pseudoobscura GN=trc PE=3 SV=1//1.80297e-148
Cla007595	91.3716	4.17642	4.4514	5.9641e-11	1.4764e-09	up	-//-
Cla007596	11863.6	8263.76	0.52168	0.0095739	0.035259	up	-//-
Cla007616	14237.3	9400.31	0.59889	0.0035815	0.01558	up	sp|P49690|RL23_ARATH 60S ribosomal protein L23 OS=Arabidopsis thaliana GN=RPL23A PE=2 SV=3//1.80078e-97
Cla007622	2832.49	1176.46	1.2676	7.4052e-09	1.2788e-07	up	sp|B9SQR9|GATB_RICCO Glutamyl-tRNA(Gln) amidotransferase subunit B, chloroplastic/mitochondrial OS=Ricinus communis GN=GATB PE=3 SV=1//0
Cla007623	570.404	350.859	0.70109	0.0076362	0.029338	up	-//-
Cla007631	6520.6	4179.34	0.64173	0.0022152	0.010409	up	sp|O49313|NDADB_ARATH NADH dehydrogenase [ubiquinone] 1 alpha subcomplex subunit 13-B OS=Arabidopsis thaliana GN=At2g33220 PE=2 SV=1//1.14284e-91
Cla007634	33.9796	1.26141	4.7516	0.0038515	0.016556	up	sp|O49816|LEA1_CICAR Late embryogenesis abundant protein 1 OS=Cicer arietinum PE=2 SV=1//5.6392e-07
Cla007635	3933.51	170.446	4.5284	1.195e-10	2.7755e-09	up	sp|Q9LIR6|BAM1_ARATH Beta-amylase 1, chloroplastic OS=Arabidopsis thaliana GN=BAM1 PE=1 SV=1//0
Cla007637	1124.49	537.376	1.0653	6.4923e-06	6.1697e-05	up	sp|Q9T0H2|SMAP1_ARATH Small acidic protein 1 OS=Arabidopsis thaliana GN=SMAP1 PE=1 SV=1//1.65447e-08
Cla007641	876.59	250.607	1.8065	4.1983e-12	1.2125e-10	up	-//-
Cla007642	1014.76	268.539	1.9179	7.5863e-14	2.6948e-12	up	-//-
Cla007649	1422.33	364.074	1.9659	1.1546e-15	5.0904e-14	up	sp|Q9ZSY9|C74B2_ARATH Linolenate hydroperoxide lyase, chloroplastic OS=Arabidopsis thaliana GN=CYP74B2 PE=1 SV=1//1.37759e-45
Cla007650	6823.19	1664.55	2.0353	1.2498e-20	9.0242e-19	up	sp|B3LF83|Y74B2_ARATH Probable inactive linolenate hydroperoxide lyase OS=Arabidopsis thaliana GN=CYP74B2 PE=2 SV=1//5.01442e-133
Cla007656	4566.39	1156.54	1.9812	9.9286e-20	6.53e-18	up	sp|Q9C519|WRKY6_ARATH WRKY transcription factor 6 OS=Arabidopsis thaliana GN=WRKY6 PE=1 SV=1//5.45129e-106
Cla007673	1671.25	628.956	1.4099	9.7846e-10	1.9796e-08	up	sp|O23049|RK6_ARATH 50S ribosomal protein L6, chloroplastic OS=Arabidopsis thaliana GN=RPL6 PE=2 SV=1//3.83753e-111
Cla007676	804.01	483.022	0.73512	0.0025039	0.011574	up	sp|Q6DFQ5|TMM97_XENTR Transmembrane protein 97 OS=Xenopus tropicalis GN=tmem97 PE=2 SV=1//1.16417e-08
Cla007678	1254.63	326.869	1.9405	5.235e-06	5.1039e-05	up	-//-
Cla007679	5598.05	2556.27	1.1309	7.3545e-08	1.0567e-06	up	sp|O48650|SUI1_SALBA Protein translation factor SUI1 homolog OS=Salix bakko PE=3 SV=1//4.0487e-56
Cla007688	285.994	21.7939	3.714	3.8206e-20	2.5985e-18	up	sp|Q9LJB7|BBX32_ARATH B-box zinc finger protein 32 OS=Arabidopsis thaliana GN=BBX32 PE=1 SV=1//2.41894e-13
Cla007693	2300.45	365.637	2.6534	0.0066613	0.026219	up	sp|Q9LRJ9|CRR38_ARATH Cysteine-rich repeat secretory protein 38 OS=Arabidopsis thaliana GN=CRRSP38 PE=2 SV=1//1.26667e-68
Cla007696	581.83	342.396	0.76493	0.0036223	0.015737	up	sp|Q9SB42|MDA1_ARATH Mediator-associated protein 1 OS=Arabidopsis thaliana GN=At4g25210 PE=1 SV=1//9.8453e-25
Cla007705	71.4387	11.4506	2.6413	6.8992e-05	0.00051225	up	-//-
Cla007708	10443.4	6726.92	0.63457	0.0016111	0.0079	up	sp|Q54Q39|PP1R7_DICDI Protein phosphatase 1 regulatory subunit pprA OS=Dictyostelium discoideum GN=pprA PE=3 SV=1//6.77989e-08
Cla007709	2336.52	1280.91	0.86719	9.6781e-05	0.00068635	up	sp|Q9ZR08|Y4230_ARATH G-type lectin S-receptor-like serine/threonine-protein kinase At4g03230 OS=Arabidopsis thaliana GN=At4g03230 PE=3 SV=3//2.44893e-146
Cla007717	2520.35	485.429	2.3763	2.2102e-24	2.1804e-22	up	sp|Q69S39|UCRIA_ORYSJ Cytochrome b6-f complex iron-sulfur subunit, chloroplastic OS=Oryza sativa subsp. japonica GN=petC PE=1 SV=1//1.23407e-110
Cla007720	3104.25	1918.4	0.69434	0.0011086	0.0057234	up	sp|Q7XAB8|THF1_SOLTU Protein THYLAKOID FORMATION1, chloroplastic OS=Solanum tuberosum GN=THF1 PE=2 SV=1//1.12001e-144
Cla007730	488.998	300.448	0.70271	0.010733	0.038628	up	sp|Q8GZA8|ULT1_ARATH Protein ULTRAPETALA 1 OS=Arabidopsis thaliana GN=ULT1 PE=1 SV=1//1.48194e-124
Cla007732	3985.25	690.89	2.5281	5.7776e-24	5.4827e-22	up	sp|Q9SKT3|SCAM1_ARATH Secretory carrier-associated membrane protein 1 OS=Arabidopsis thaliana GN=SCAMP1 PE=2 SV=1//5.70083e-139
Cla007734	2342.59	1367.3	0.77678	0.00038988	0.0022987	up	sp|B9H5L9|LIAS_POPTR Lipoyl synthase, mitochondrial OS=Populus trichocarpa GN=LIP1 PE=3 SV=1//0
Cla007739	655.34	354.481	0.88654	0.00061517	0.0034102	up	sp|Q754F0|SYM1_ASHGO Protein SYM1 OS=Ashbya gossypii (strain ATCC 10895 / CBS 109.51 / FGSC 9923 / NRRL Y-1056) GN=SYM1 PE=3 SV=1//8.0158e-19
Cla007745	10.6043	0	Inf	0.010733	0.038628	up	sp|Q9SKT1|ERF53_ARATH Ethylene-responsive transcription factor ERF053 OS=Arabidopsis thaliana GN=ERF053 PE=2 SV=1//4.87749e-54
Cla007752	40738.6	20826.2	0.968	2.0017e-05	0.00016982	up	sp|Q00497|SK_SOLLC Shikimate kinase, chloroplastic OS=Solanum lycopersicum GN=SK PE=1 SV=1//6.33558e-91
Cla007762	175.351	0.380717	8.8473	4.9581e-26	5.5198e-24	up	-//-
Cla007763	21473.6	5109.25	2.0714	8.1014e-23	7.1753e-21	up	sp|Q9SQT8|DHQSD_ARATH Bifunctional 3-dehydroquinate dehydratase/shikimate dehydrogenase, chloroplastic OS=Arabidopsis thaliana GN=EMB3004 PE=1 SV=1//0
Cla007776	1868.59	142.745	3.7104	1.0608e-18	6.3865e-17	up	sp|Q93X23|MYRS_QUEIL Myrcene synthase, chloroplastic OS=Quercus ilex PE=1 SV=1//2.97476e-38
Cla007777	598.022	46.5377	3.6837	1.9933e-11	5.2266e-10	up	sp|Q93X23|MYRS_QUEIL Myrcene synthase, chloroplastic OS=Quercus ilex PE=1 SV=1//8.38425e-33
Cla007782	4668.99	2536.89	0.88005	9.6698e-05	0.00068601	up	sp|P42734|CADH9_ARATH Probable cinnamyl alcohol dehydrogenase 9 OS=Arabidopsis thaliana GN=CAD9 PE=2 SV=2//0
Cla007786	43.0298	8.89582	2.2741	0.0040215	0.017131	up	sp|Q9FGG3|WTR45_ARATH WAT1-related protein At5g64700 OS=Arabidopsis thaliana GN=At5g64700 PE=2 SV=1//1.81161e-24
Cla007791	2343.16	1135.97	1.0445	2.1326e-06	2.2885e-05	up	sp|Q9FIC3|BOLA2_ARATH Protein BOLA2 OS=Arabidopsis thaliana GN=BOLA2 PE=1 SV=1//2.53799e-28
Cla007800	156.456	66.3472	1.2377	0.0031892	0.014179	up	-//-
Cla007816	653.764	121.402	2.429	0.01099	0.039405	up	sp|A7PZL3|PGLR_VITVI Probable polygalacturonase OS=Vitis vinifera GN=GSVIVT00026920001 PE=1 SV=1//4.79941e-139
Cla007817	1702.9	1060.58	0.68314	0.0023401	0.010903	up	sp|O23657|RABC1_ARATH Ras-related protein RABC1 OS=Arabidopsis thaliana GN=RABC1 PE=1 SV=1//2.15912e-99
Cla007818	126.514	55.346	1.1928	0.0050343	0.020736	up	-//-
Cla007819	77.2278	30.309	1.3494	0.012962	0.045095	up	sp|Q9FXA4|PUB26_ARATH U-box domain-containing protein 26 OS=Arabidopsis thaliana GN=PUB26 PE=2 SV=1//9.50284e-35
Cla007826	3645	2230.12	0.7088	0.00091529	0.004842	up	sp|P57108|GSTZ_EUPES Glutathione S-transferase zeta class OS=Euphorbia esula PE=2 SV=1//6.06552e-115
Cla007831	1734.8	613.034	1.5007	1.1458e-10	2.6768e-09	up	sp|Q94AQ6|SIR4_ARATH NAD-dependent protein deacylase SRT2 OS=Arabidopsis thaliana GN=SRT2 PE=2 SV=1//2.44261e-153
Cla007833	1720.93	503.553	1.773	6.2026e-14	2.2271e-12	up	sp|Q9M060|IF62_ARATH Eukaryotic translation initiation factor 6-2 OS=Arabidopsis thaliana GN=EIF6-2 PE=2 SV=1//5.65755e-144
Cla007835	3251.29	1620.54	1.0045	3.6534e-06	3.7089e-05	up	sp|Q93ZD7|MRS24_ARATH Magnesium transporter MRS2-4 OS=Arabidopsis thaliana GN=MRS2-4 PE=2 SV=1//1.30122e-99
Cla007836	1018.33	380.55	1.42	8.9854e-09	1.5276e-07	up	-//-
Cla007837	2690.13	1061.28	1.3419	1.2877e-09	2.5158e-08	up	sp|B0BNA9|CNO11_RAT CCR4-NOT transcription complex subunit 11 OS=Rattus norvegicus GN=Cnot11 PE=2 SV=1//4.5968e-62
Cla007838	1259.06	736.778	0.77304	0.00088912	0.0047249	up	sp|Q9CQR4|ACO13_MOUSE Acyl-coenzyme A thioesterase 13 OS=Mus musculus GN=Acot13 PE=1 SV=1//1.67632e-24
Cla007839	1694.08	1063.35	0.67188	0.0081974	0.031128	up	sp|P28583|CDPK_SOYBN Calcium-dependent protein kinase SK5 OS=Glycine max PE=1 SV=1//0
Cla007846	18.7149	1.29414	3.8541	0.0076172	0.02927	up	sp|Q9SZP1|MYB4_ARATH Transcription repressor MYB4 OS=Arabidopsis thaliana GN=MYB4 PE=1 SV=1//4.11764e-83
Cla007851	4961.52	2237.64	1.1488	6.1293e-08	9.0277e-07	up	-//-
Cla007908	1782.87	510.739	1.8035	1.1723e-14	4.5099e-13	up	-//-
Cla007909	5217.85	1422.06	1.8755	2.1463e-09	4.0465e-08	up	-//-
Cla007929	1137.53	619.455	0.87684	0.00021492	0.0013749	up	sp|O48965|IDI2_CAMAC Isopentenyl-diphosphate Delta-isomerase II OS=Camptotheca acuminata GN=IPI2 PE=2 SV=1//6.24429e-147
Cla007950	793.544	40.7055	4.285	5.067e-09	8.9995e-08	up	sp|Q9FMC2|BZP43_ARATH Basic leucine zipper 43 OS=Arabidopsis thaliana GN=BZIP43 PE=1 SV=1//8.88448e-22
Cla007961	1576.01	942.137	0.74227	0.0012595	0.0064046	up	sp|Q8GX84|C3H1_ARATH Zinc finger CCCH domain-containing protein 1 OS=Arabidopsis thaliana GN=At1g01350 PE=2 SV=2//2.97584e-138
Cla007969	41.4969	4.71941	3.1363	0.0011836	0.006054	up	sp|Q5GHF7|IPT_HUMLU Adenylate isopentenyltransferase OS=Humulus lupulus PE=1 SV=1//6.89219e-101
Cla007987	8888.43	1339.65	2.7301	4.3813e-29	6.0215e-27	up	sp|Q54I39|IST1L_DICDI IST1-like protein OS=Dictyostelium discoideum GN=DDB_G0289029 PE=3 SV=1//5.67053e-09
Cla008000	4691.39	1672.28	1.4882	1.154e-05	0.00010294	up	sp|Q9S7Y7|XYL1_ARATH Alpha-xylosidase 1 OS=Arabidopsis thaliana GN=XYL1 PE=1 SV=1//0
Cla008004	11291.7	4413.78	1.3552	3.8006e-06	3.8412e-05	up	sp|Q8RWD0|COL16_ARATH Zinc finger protein CONSTANS-LIKE 16 OS=Arabidopsis thaliana GN=COL16 PE=2 SV=2//7.70162e-75
Cla008007	59.9237	16.9875	1.8187	0.0044668	0.018748	up	-//-
Cla008009	4622.03	1763.34	1.3902	9.0199e-11	2.1578e-09	up	-//-
Cla008020	443.636	55.4311	3.0006	7.2869e-11	1.7709e-09	up	-//-
Cla008027	1179.97	39.6503	4.8953	1.1172e-58	7.4214e-56	up	sp|Q766C3|NEP1_NEPGR Aspartic proteinase nepenthesin-1 OS=Nepenthes gracilis GN=nep1 PE=1 SV=1//1.74658e-138
Cla008047	568.662	99.169	2.5196	1.0187e-11	2.7964e-10	up	sp|O48529|STR9_ARATH Rhodanese-like domain-containing protein 9, chloroplastic OS=Arabidopsis thaliana GN=STR9 PE=2 SV=1//1.0954e-32
Cla008058	2713.84	1664.73	0.70504	0.0010585	0.0054941	up	sp|B9SL58|PURA2_RICCO Adenylosuccinate synthetase 2, chloroplastic OS=Ricinus communis GN=PURA2 PE=3 SV=1//0
Cla008067	407.155	131.785	1.6274	1.3915e-07	1.8993e-06	up	sp|F4J3G5|CTPA3_ARATH Carboxyl-terminal-processing peptidase 3, chloroplastic OS=Arabidopsis thaliana GN=CTPA3 PE=3 SV=1//0
Cla008070	1452.21	744.468	0.96397	2.9675e-05	0.00024237	up	sp|P38838|WSS1_YEAST DNA-dependent metalloprotease WSS1 OS=Saccharomyces cerevisiae (strain ATCC 204508 / S288c) GN=WSS1 PE=1 SV=1//4.25058e-32
Cla008083	5075.46	3055.05	0.73234	0.00047076	0.0027075	up	-//-
Cla008099	2086.58	1424.47	0.55072	0.011884	0.042029	up	sp|Q8RXL8|Y1689_ARATH Uncharacterized membrane protein At1g06890 OS=Arabidopsis thaliana GN=At1g06890 PE=1 SV=1//1.26093e-164
Cla008101	15899.2	10374.3	0.61595	0.0028147	0.01278	up	sp|P35017|SODM_HEVBR Superoxide dismutase [Mn], mitochondrial OS=Hevea brasiliensis GN=SODA PE=2 SV=1//7.46707e-138
Cla008110	422.282	237.237	0.83188	0.0027394	0.012484	up	sp|Q8GWL2|LOR7_ARATH Protein LURP-one-related 7 OS=Arabidopsis thaliana GN=At2g30270 PE=2 SV=1//3.85367e-13
Cla008113	6570.4	4063.88	0.69312	0.00084715	0.004526	up	sp|Q8LPR9|TI110_ARATH Protein TIC110, chloroplastic OS=Arabidopsis thaliana GN=TIC110 PE=1 SV=1//0
Cla008122	2491.51	658.291	1.9202	2.053e-14	7.7193e-13	up	sp|Q9S9N9|CCR1_ARATH Cinnamoyl-CoA reductase 1 OS=Arabidopsis thaliana GN=CCR1 PE=1 SV=1//3.61841e-67
Cla008124	3157.37	1733.91	0.8647	6.3892e-05	0.00047813	up	sp|P13284|GILT_HUMAN Gamma-interferon-inducible lysosomal thiol reductase OS=Homo sapiens GN=IFI30 PE=1 SV=3//1.04973e-25
Cla008125	1408.69	887.544	0.66647	0.0034507	0.01511	up	sp|A6QPN6|GILT_BOVIN Gamma-interferon-inducible lysosomal thiol reductase OS=Bos taurus GN=IFI30 PE=2 SV=1//4.98824e-23
Cla008130	798.367	458.222	0.801	0.0011591	0.0059381	up	sp|Q8R3F5|FABD_MOUSE Malonyl-CoA-acyl carrier protein transacylase, mitochondrial OS=Mus musculus GN=Mcat PE=1 SV=3//2.96199e-71
Cla008131	615.764	164.062	1.9081	1.3951e-11	3.7368e-10	up	sp|Q944L7|Y1480_ARATH Uncharacterized protein At1g18480 OS=Arabidopsis thaliana GN=At1g18480 PE=2 SV=1//2.61336e-52
Cla008138	1781.7	1029.47	0.79136	0.0033493	0.014763	up	sp|Q9LMK2|LSH6_ARATH Protein LIGHT-DEPENDENT SHORT HYPOCOTYLS 6 OS=Arabidopsis thaliana GN=LSH6 PE=1 SV=1//6.6151e-75
Cla008139	382.237	221.956	0.78419	0.0059267	0.023759	up	sp|Q9VQ26|RB3GP_DROME Rab3 GTPase-activating protein catalytic subunit OS=Drosophila melanogaster GN=CG31935 PE=1 SV=2//6.846e-23
Cla008140	476.885	267.826	0.83235	0.0024817	0.01149	up	sp|Q15042|RB3GP_HUMAN Rab3 GTPase-activating protein catalytic subunit OS=Homo sapiens GN=RAB3GAP1 PE=1 SV=3//6.37735e-10
Cla008142	797.903	484.879	0.71859	0.0032912	0.014549	up	sp|Q67ZM7|PHYK2_ARATH Probable phytol kinase 2, chloroplastic OS=Arabidopsis thaliana GN=At5g58560 PE=2 SV=2//1.07493e-109
Cla008144	383.703	48.0037	2.9988	0.00076286	0.0041196	up	sp|Q42381|HLS1_ARATH Probable N-acetyltransferase HLS1 OS=Arabidopsis thaliana GN=HLS1 PE=1 SV=1//4.29389e-118
Cla008166	2388.12	1644.89	0.53789	0.013863	0.047622	up	sp|Q9CQ48|NUDC2_MOUSE NudC domain-containing protein 2 OS=Mus musculus GN=Nudcd2 PE=1 SV=1//1.01822e-27
Cla008178	6602.69	4646.47	0.50692	0.014035	0.048089	up	sp|Q9FIM2|FTSH9_ARATH ATP-dependent zinc metalloprotease FTSH 9, chloroplastic OS=Arabidopsis thaliana GN=FTSH9 PE=2 SV=1//0
Cla008180	2819.4	1234.33	1.1917	5.6486e-08	8.3817e-07	up	-//-
Cla008181	1950.5	1217.48	0.67994	0.0019059	0.0091346	up	sp|A7LXU3|BGH3B_BACO1 Beta-glucosidase BoGH3B OS=Bacteroides ovatus (strain ATCC 8483 / DSM 1896 / JCM 5824 / NCTC 11153) GN=BACOVA_02659 PE=1 SV=1//6.61629e-87
Cla008195	1198.48	788.315	0.60437	0.0081359	0.030929	up	sp|Q5XK67|RPAC2_XENLA DNA-directed RNA polymerases I and III subunit RPAC2 OS=Xenopus laevis GN=polr1d PE=3 SV=1//3.70963e-24
Cla008197	586.776	166.822	1.8145	2.3455e-10	5.1364e-09	up	sp|P27880|HSP12_MEDSA 18.2 kDa class I heat shock protein OS=Medicago sativa GN=HSP18.2 PE=2 SV=1//8.65182e-62
Cla008201	50.1994	4.80672	3.3845	4.3831e-05	0.00034348	up	sp|U3UA11|UGT7_CATRO UDP-glucose iridoid glucosyltransferase OS=Catharanthus roseus GN=UGT76A2 PE=1 SV=1//4.85666e-130
Cla008210	1905.31	740.426	1.3636	1.9872e-09	3.7751e-08	up	sp|Q6DBM8|MTPB_ARATH Metal tolerance protein B OS=Arabidopsis thaliana GN=MTPB PE=2 SV=1//3.94109e-117
Cla008212	12167.3	5569.65	1.1274	0.0044883	0.018826	up	sp|Q9LNW3|P2C03_ARATH Protein phosphatase 2C 3 OS=Arabidopsis thaliana GN=AIP1 PE=1 SV=1//3.74011e-118
Cla008214	668.526	271.826	1.2983	1.0327e-06	1.1834e-05	up	sp|Q9STF3|PP265_ARATH Pentatricopeptide repeat-containing protein At3g46790, chloroplastic OS=Arabidopsis thaliana GN=CRR2 PE=2 SV=1//0
Cla008215	346.664	140.379	1.3042	2.2793e-05	0.00019077	up	sp|Q9ZW12|TRNH5_ARATH Tropinone reductase homolog At2g29260, chloroplastic OS=Arabidopsis thaliana GN=At2g29260 PE=2 SV=1//1.14208e-114
Cla008218	3581	2354.25	0.6051	0.0039107	0.016749	up	sp|Q0WWW9|XYLL3_ARATH D-xylose-proton symporter-like 3, chloroplastic OS=Arabidopsis thaliana GN=At5g59250 PE=2 SV=2//0
Cla008222	339.761	85.674	1.9876	2.5967e-07	3.3428e-06	up	-//-
Cla008226	556.523	44.4344	3.6467	2.6537e-06	2.7775e-05	up	sp|Q09893|YAI5_SCHPO Uncharacterized protein C24B11.05 OS=Schizosaccharomyces pombe (strain 972 / ATCC 24843) GN=SPAC24B11.05 PE=3 SV=1//4.70827e-16
Cla008230	3809.37	2390.62	0.67217	0.0017332	0.0083978	up	sp|Q93Y40|ORP3C_ARATH Oxysterol-binding protein-related protein 3C OS=Arabidopsis thaliana GN=ORP3C PE=2 SV=1//0
Cla008239	2818.06	850.031	1.7291	5.2694e-15	2.1257e-13	up	sp|P52409|E13B_WHEAT Glucan endo-1,3-beta-glucosidase OS=Triticum aestivum GN=GLC1 PE=2 SV=1//6.43427e-161
Cla008245	3039.5	1272.63	1.256	1.1462e-07	1.5862e-06	up	sp|Q41050|OEP16_PEA Outer envelope pore protein 16, chloroplastic OS=Pisum sativum GN=OEP16 PE=1 SV=1//9.25521e-55
Cla008249	2558.66	1623.16	0.65658	0.0026475	0.01212	up	sp|Q9SNC6|PUB13_ARATH U-box domain-containing protein 13 OS=Arabidopsis thaliana GN=PUB13 PE=1 SV=1//0
Cla008253	672.334	425.451	0.66019	0.0095374	0.035138	up	sp|O50044|KDSA_PEA 2-dehydro-3-deoxyphosphooctonate aldolase OS=Pisum sativum GN=KDSA PE=2 SV=1//6.6651e-140
Cla008264	2402.21	581.199	2.0473	2.3908e-16	1.1536e-14	up	sp|Q9LRQ8|PMAT2_ARATH Phenolic glucoside malonyltransferase 2 OS=Arabidopsis thaliana GN=PMAT2 PE=1 SV=1//1.91544e-92
Cla008275	205.613	24.6654	3.0594	8.7824e-13	2.778e-11	up	-//-
Cla008278	38.4816	8.2752	2.2173	0.010155	0.036881	up	sp|Q9LK95|MYB21_ARATH Transcription factor MYB21 OS=Arabidopsis thaliana GN=MYB21 PE=1 SV=1//1.38605e-50
Cla008289	28569.3	12275.6	1.2187	2.8915e-09	5.3206e-08	up	sp|Q9FVI1|ADF2_PETHY Actin-depolymerizing factor 2 OS=Petunia hybrida GN=ADF2 PE=2 SV=1//8.33615e-54
Cla008299	163.544	46.7743	1.8059	1.4867e-05	0.00012972	up	sp|P36151|YK50_YEAST Uncharacterized protein YKR070W OS=Saccharomyces cerevisiae (strain ATCC 204508 / S288c) GN=YKR070W PE=1 SV=1//9.60217e-11
Cla008300	3207.8	1878.68	0.77186	0.00035569	0.002116	up	sp|Q8LCU7|MECR_ARATH Probable trans-2-enoyl-CoA reductase, mitochondrial OS=Arabidopsis thaliana GN=At3g45770 PE=2 SV=1//0
Cla008301	3119.27	1379.1	1.1775	6.5336e-08	9.5316e-07	up	sp|Q9LQQ8|RLCK7_ARATH Probable serine/threonine-protein kinase RLCKVII OS=Arabidopsis thaliana GN=At1g07870 PE=2 SV=1//0
Cla008320	14831.8	9187.62	0.69093	0.00060105	0.0033411	up	sp|Q2V9B0|MY1R1_SOLTU Transcription factor MYB1R1 OS=Solanum tuberosum PE=2 SV=1//1.30274e-22
Cla008325	428.973	231.22	0.89162	0.001511	0.0074699	up	sp|Q9LV16|B3GTJ_ARATH Probable beta-1,3-galactosyltransferase 19 OS=Arabidopsis thaliana GN=B3GALT19 PE=2 SV=2//0
Cla008328	39024.3	2893.26	3.7536	8.0831e-49	3.8353e-46	up	sp|Q54DY9|BCS1B_DICDI Probable mitochondrial chaperone BCS1-B OS=Dictyostelium discoideum GN=bcsl1b PE=3 SV=1//6.46122e-29
Cla008329	607.711	379.245	0.68026	0.0075399	0.029046	up	sp|Q9SSG3|HIPL1_ARATH HIPL1 protein OS=Arabidopsis thaliana GN=HIPL1 PE=1 SV=2//0
Cla008340	4225.7	2035.88	1.0535	5.7142e-07	6.8556e-06	up	-//-
Cla008356	53.1797	9.75456	2.4467	0.0010303	0.0053663	up	sp|F1SWA0|ZERSY_ZINZE Zerumbone synthase OS=Zingiber zerumbet GN=ZSD1 PE=1 SV=1//1.24672e-93
Cla008358	639.642	319.85	0.99987	0.0001504	0.0010136	up	sp|Q8LEB2|ADHL6_ARATH Alcohol dehydrogenase-like 6 OS=Arabidopsis thaliana GN=At5g24760 PE=2 SV=2//0
Cla008363	1894	974.674	0.95845	0.0014485	0.0072019	up	-//-
Cla008372	6458.39	4131.63	0.64446	0.0016751	0.0081717	up	-//-
Cla008377	5502.8	3070.12	0.84187	0.00059925	0.0033329	up	-//-
Cla008391	5015.45	3500.86	0.51867	0.012659	0.044179	up	sp|Q6PC91|BT3L4_DANRE Transcription factor BTF3 homolog 4 OS=Danio rerio GN=btf3l4 PE=2 SV=1//1.56286e-46
Cla008397	2643.87	104.042	4.6674	1.3707e-24	1.3866e-22	up	sp|Q766C2|NEP2_NEPGR Aspartic proteinase nepenthesin-2 OS=Nepenthes gracilis GN=nep2 PE=1 SV=1//1.61557e-36
Cla008411	939.566	405.633	1.2118	1.251e-06	1.4077e-05	up	sp|Q8W103|CHR24_ARATH Protein CHROMATIN REMODELING 24 OS=Arabidopsis thaliana GN=CHR24 PE=2 SV=1//8.85892e-12
Cla008414	4322.6	2614.81	0.72519	0.00049158	0.0028117	up	sp|Q9LY87|RGLG2_ARATH E3 ubiquitin-protein ligase RGLG2 OS=Arabidopsis thaliana GN=RGLG2 PE=1 SV=1//3.93894e-137
Cla008424	14.3225	0.304475	5.5558	0.0062726	0.024932	up	sp|Q41916|CYT5_ARATH Cysteine proteinase inhibitor 5 OS=Arabidopsis thaliana GN=CYS5 PE=2 SV=2//4.3059e-12
Cla008425	1635.24	676.277	1.2738	5.4551e-08	8.1187e-07	up	sp|Q941D6|HDA14_ARATH Histone deacetylase 14 OS=Arabidopsis thaliana GN=HDA14 PE=2 SV=1//0
Cla008426	17394	8407.83	1.0488	0.00063634	0.0035127	up	sp|Q84JL2|ODBA2_ARATH 2-oxoisovalerate dehydrogenase subunit alpha 2, mitochondrial OS=Arabidopsis thaliana GN=At5g09300 PE=1 SV=1//0
Cla008427	836.459	513.546	0.7038	0.0038728	0.016629	up	sp|Q42546|DPNP1_ARATH SAL1 phosphatase OS=Arabidopsis thaliana GN=SAL1 PE=1 SV=1//4.49006e-160
Cla008429	1701.97	476.229	1.8375	3.1536e-15	1.316e-13	up	sp|P49107|PSAN_ARATH Photosystem I reaction center subunit N, chloroplastic OS=Arabidopsis thaliana GN=PSAN PE=1 SV=2//6.49169e-73
Cla008430	504.646	139.156	1.8586	4.0563e-10	8.6134e-09	up	sp|Q9S829|NDHO_ARATH NAD(P)H-quinone oxidoreductase subunit O, chloroplastic OS=Arabidopsis thaliana GN=ndhO PE=2 SV=1//1.24113e-49
Cla008431	5897.95	3793.27	0.63677	0.002405	0.011174	up	sp|Q9CAD5|YODA_ARATH Mitogen-activated protein kinase kinase kinase YODA OS=Arabidopsis thaliana GN=YDA PE=1 SV=1//3.2529e-132
Cla008434	3079.8	1508.66	1.0296	2.0727e-06	2.2339e-05	up	sp|Q9FY82|NAC82_ARATH NAC domain-containing protein 82 OS=Arabidopsis thaliana GN=NAC082 PE=1 SV=1//1.11289e-77
Cla008446	1822.95	1214.29	0.58617	0.0090835	0.033709	up	sp|Q2JS42|PYRH_SYNJA Uridylate kinase OS=Synechococcus sp. (strain JA-3-3Ab) GN=pyrH PE=3 SV=1//7.90723e-99
Cla008454	1851.68	938.484	0.98043	0.0038008	0.01637	up	sp|Q6NQG7|ATL78_ARATH RING-H2 finger protein ATL78 OS=Arabidopsis thaliana GN=ATL78 PE=2 SV=1//1.79143e-54
Cla008459	467.711	275.032	0.76602	0.0059873	0.023973	up	-//-
Cla008469	1166.38	675.894	0.78717	0.00088258	0.0046939	up	sp|Q9C8C1|LCV2_ARATH Protein LIKE COV 2 OS=Arabidopsis thaliana GN=LCV2 PE=2 SV=1//3.16977e-133
Cla008478	1350.66	569.925	1.2448	1.0478e-07	1.4611e-06	up	sp|Q9SRE4|UGAL2_ARATH UDP-galactose transporter 2 OS=Arabidopsis thaliana GN=UDP-GALT2 PE=2 SV=1//1.62831e-90
Cla008486	5643.03	3260.43	0.79141	0.00015169	0.0010209	up	sp|Q9SJ12|ATP7_ARATH Probable ATP synthase 24 kDa subunit, mitochondrial OS=Arabidopsis thaliana GN=At2g21870 PE=1 SV=1//1.045e-105
Cla008487	2550.06	1452.94	0.81156	0.00020311	0.0013103	up	sp|Q9XIK3|ISCAP_ARATH Iron-sulfur assembly protein IscA, chloroplastic OS=Arabidopsis thaliana GN=ISCA PE=2 SV=2//4.69375e-82
Cla008498	620.616	120.708	2.3622	1.9053e-16	9.2607e-15	up	sp|Q9FVS9|C96AF_ARATH Alkane hydroxylase MAH1 OS=Arabidopsis thaliana GN=CYP96A15 PE=2 SV=1//4.24452e-149
Cla008501	398.575	189.467	1.0729	0.00029563	0.0018077	up	sp|Q9SJ05|SK1_ARATH Shikimate kinase 1, chloroplastic OS=Arabidopsis thaliana GN=SK1 PE=1 SV=2//8.90358e-102
Cla008502	443.924	248.022	0.83985	0.0025817	0.011876	up	sp|Q9SJ02|STEP2_ARATH Stress enhanced protein 2, chloroplastic OS=Arabidopsis thaliana GN=SEP2 PE=2 SV=1//1.41027e-62
Cla008504	2442.32	1587.78	0.62124	0.0043419	0.018289	up	sp|Q9SIZ8|RKP_ARATH E3 ubiquitin-protein ligase RKP OS=Arabidopsis thaliana GN=RKP PE=2 SV=2//0
Cla008506	2993.31	1721.25	0.79829	0.00020956	0.0013458	up	sp|Q9SDY5|RCE1_ARATH NEDD8-conjugating enzyme Ubc12 OS=Arabidopsis thaliana GN=RCE1 PE=1 SV=1//5.47596e-119
Cla008514	2662.29	1369.87	0.95863	8.2599e-06	7.6488e-05	up	-//-
Cla008526	1519.94	788.299	0.9472	2.4322e-05	0.00020271	up	sp|Q9LXU9|IRKI_ARATH IRK-interacting protein OS=Arabidopsis thaliana GN=IRKI PE=1 SV=1//0
Cla008545	1067.66	634.324	0.75116	0.001387	0.0069427	up	sp|Q9LXV3|DIT1_ARATH Dicarboxylate transporter 1, chloroplastic OS=Arabidopsis thaliana GN=DIT1 PE=1 SV=1//3.19033e-86
Cla008555	1444.98	342.437	2.0771	2.4878e-17	1.3363e-15	up	-//-
Cla008561	5359.38	3373.05	0.66801	0.0010642	0.0055214	up	sp|Q9S9N9|CCR1_ARATH Cinnamoyl-CoA reductase 1 OS=Arabidopsis thaliana GN=CCR1 PE=1 SV=1//1.10898e-91
Cla008577	1415.08	770.475	0.87707	0.00015563	0.0010404	up	sp|Q3E9B8|AB23G_ARATH ABC transporter G family member 23 OS=Arabidopsis thaliana GN=ABCG23 PE=2 SV=1//0
Cla008578	1048.75	410.499	1.3532	2.9078e-08	4.5342e-07	up	-//-
Cla008580	1133.39	564.538	1.0055	0.0042811	0.018075	up	sp|Q8RWL5|CLT3_ARATH Protein CLT3, chloroplastic OS=Arabidopsis thaliana GN=CLT3 PE=2 SV=1//1.898e-133
Cla008584	11293.7	7832.03	0.52806	0.0088624	0.033054	up	sp|Q9FMP3|DPYS_ARATH Dihydropyrimidinase OS=Arabidopsis thaliana GN=PYD2 PE=1 SV=1//0
Cla008590	812.989	381.705	1.0908	1.1943e-05	0.00010625	up	sp|O81027|HMGCL_ARATH Hydroxymethylglutaryl-CoA lyase, mitochondrial OS=Arabidopsis thaliana GN=HMGCL PE=1 SV=2//0
Cla008591	745.273	335.385	1.1519	6.0609e-06	5.7957e-05	up	-//-
Cla008593	2111.12	1122.73	0.911	4.0417e-05	0.00032025	up	sp|Q6PDI5|ECM29_MOUSE Proteasome-associated protein ECM29 homolog OS=Mus musculus GN=Ecm29 PE=1 SV=3//3.57079e-126
Cla008594	1618.77	981.98	0.72113	0.0010155	0.0052991	up	sp|Q5VYK3|ECM29_HUMAN Proteasome-associated protein ECM29 homolog OS=Homo sapiens GN=ECM29 PE=1 SV=2//6.98025e-55
Cla008614	1974.52	1266.75	0.64037	0.0039728	0.016981	up	sp|Q9FX99|Y1497_ARATH Probable receptor-like protein kinase At1g49730 OS=Arabidopsis thaliana GN=At1g49730 PE=2 SV=1//2.34191e-36
Cla008622	23.9572	0.304475	6.298	0.00012366	0.00085358	up	sp|Q9SJ52|YLS9_ARATH Protein YLS9 OS=Arabidopsis thaliana GN=YLS9 PE=2 SV=1//7.41536e-10
Cla008625	3708.47	911.519	2.0245	8.7597e-20	5.8383e-18	up	sp|Q96KR6|F210B_HUMAN Protein FAM210B OS=Homo sapiens GN=FAM210B PE=1 SV=2//5.8128e-06
Cla008639	851.848	500.602	0.76693	0.001648	0.0080573	up	-//-
Cla008642	70.1109	20.9346	1.7437	0.0033675	0.014827	up	sp|Q9ZNT0|VPS4_ARATH Protein SUPPRESSOR OF K(+) TRANSPORT GROWTH DEFECT 1 OS=Arabidopsis thaliana GN=SKD1 PE=1 SV=1//1.42485e-25
Cla008661	1937.24	1057.59	0.87322	0.00010418	0.00073259	up	sp|Q55535|Y328_SYNY3 Putative low molecular weight protein-tyrosine-phosphatase slr0328 OS=Synechocystis sp. (strain PCC 6803 / Kazusa) GN=slr0328 PE=3 SV=1//1.03322e-38
Cla008662	1604.37	1014.4	0.66138	0.0033616	0.014808	up	sp|Q8H0W2|HDA9_ARATH Histone deacetylase 9 OS=Arabidopsis thaliana GN=HDA9 PE=1 SV=1//0
Cla008663	2261.49	1182.92	0.93493	1.9667e-05	0.00016728	up	-//-
Cla008664	1067.98	665.103	0.68323	0.0035719	0.015542	up	-//-
Cla008668	486.019	307.109	0.66226	0.013349	0.046208	up	sp|Q9FNJ9|CA1P_ARATH Probable 2-carboxy-D-arabinitol-1-phosphatase OS=Arabidopsis thaliana GN=At5g22620 PE=1 SV=1//0
Cla008681	5187.62	1647.49	1.6548	1.8386e-14	6.9657e-13	up	sp|Q9FGP9|RER1_ARATH Protein RETICULATA-RELATED 1 OS=Arabidopsis thaliana GN=RER1 PE=2 SV=1//2.00071e-163
Cla008682	5989.12	1717.7	1.8019	7.8623e-17	3.9767e-15	up	sp|Q9SGE0|AXS2_ARATH UDP-D-apiose/UDP-D-xylose synthase 2 OS=Arabidopsis thaliana GN=AXS2 PE=2 SV=1//0
Cla008693	2182.65	1493.62	0.54727	0.011016	0.039478	up	sp|Q6PS57|CKS1_ORYSJ Cyclin-dependent kinases regulatory subunit 1 OS=Oryza sativa subsp. japonica GN=CKS1 PE=2 SV=1//5.53248e-47
Cla008698	12416.8	4743.43	1.3883	2.118e-11	5.5319e-10	up	sp|P11964|SODCP_PEA Superoxide dismutase [Cu-Zn], chloroplastic OS=Pisum sativum GN=SODCP PE=2 SV=1//2.49804e-87
Cla008703	1627.46	1110.44	0.55148	0.013746	0.047328	up	sp|Q42572|DNLI1_ARATH DNA ligase 1 OS=Arabidopsis thaliana GN=LIG1 PE=2 SV=2//0
Cla008706	10342.4	4996.12	1.0497	0.010132	0.036827	up	sp|Q9SJL9|XTH32_ARATH Probable xyloglucan endotransglucosylase/hydrolase protein 32 OS=Arabidopsis thaliana GN=XTH32 PE=2 SV=1//1.13015e-101
Cla008719	951.18	311.301	1.6114	9.1425e-11	2.1845e-09	up	sp|Q9FJH9|LPAH1_ARATH P-loop NTPase domain-containing protein LPA1 homolog 1 OS=Arabidopsis thaliana GN=At5g60760 PE=2 SV=1//1.26037e-69
Cla008720	14318.3	3957.14	1.8553	2.633e-18	1.5078e-16	up	sp|P08926|RUBA_PEA RuBisCO large subunit-binding protein subunit alpha, chloroplastic OS=Pisum sativum PE=1 SV=2//0
Cla008729	312.042	68.8852	2.1795	1.877e-10	4.2075e-09	up	sp|Q55874|Y103_SYNY3 Uncharacterized protein sll0103 OS=Synechocystis sp. (strain PCC 6803 / Kazusa) GN=sll0103 PE=3 SV=1//3.14584e-15
Cla008730	387.077	141.041	1.4565	6.0776e-06	5.8088e-05	up	sp|Q8VYY5|NCRK_ARATH Receptor-like serine/threonine-protein kinase NCRK OS=Arabidopsis thaliana GN=NCRK PE=1 SV=1//3.12909e-159
Cla008740	215.875	26.2965	3.0373	0.0014387	0.0071586	up	-//-
Cla008743	1430.8	166.679	3.1017	5.6599e-13	1.8456e-11	up	-//-
Cla008744	320.552	59.3341	2.4336	4.3084e-12	1.2425e-10	up	-//-
Cla008765	3714.02	1567.89	1.2442	8.6371e-06	7.9465e-05	up	sp|Q9LTC0|Y5707_ARATH Probable receptor-like protein kinase At5g47070 OS=Arabidopsis thaliana GN=At5g47070 PE=1 SV=1//3.98102e-147
Cla008768	3001.1	1366.74	1.1348	1.8113e-07	2.4193e-06	up	sp|Q503V9|ENDUB_DANRE Poly(U)-specific endoribonuclease-B OS=Danio rerio GN=endoub PE=2 SV=1//2.4035e-59
Cla008775	370.205	202.114	0.87315	0.0034038	0.014941	up	sp|Q9ZVJ5|SGGP_ARATH Haloacid dehalogenase-like hydrolase domain-containing protein Sgpp OS=Arabidopsis thaliana GN=SGPP PE=1 SV=2//1.31603e-101
Cla008780	6095.1	3794.73	0.68365	0.00068939	0.0037598	up	sp|Q9FUR2|IP5P2_ARATH Type I inositol polyphosphate 5-phosphatase 2 OS=Arabidopsis thaliana GN=IP5P2 PE=1 SV=2//0
Cla008781	1755.62	813.915	1.109	8.6529e-07	1.0078e-05	up	sp|Q42581|KPRS1_ARATH Ribose-phosphate pyrophosphokinase 1, chloroplastic OS=Arabidopsis thaliana GN=PRS1 PE=2 SV=2//0
Cla008782	2819.42	1380.23	1.0305	2.339e-06	2.4852e-05	up	-//-
Cla008783	378.911	32.5417	3.5415	0.00082249	0.0044061	up	sp|Q9LQL2|PTR14_ARATH Protein NRT1/ PTR FAMILY 7.3 OS=Arabidopsis thaliana GN=NPF7.3 PE=1 SV=2//0
Cla008794	6837.75	4415.85	0.63083	0.0025696	0.011826	up	-//-
Cla008827	2337.48	920.228	1.3449	1.5636e-09	3.0164e-08	up	sp|Q9LFD5|BPA1_ARATH Binding partner of ACD11 1 OS=Arabidopsis thaliana GN=BPA1 PE=1 SV=1//4.36997e-90
Cla008828	928.916	386.301	1.2658	3.547e-07	4.4317e-06	up	-//-
Cla008829	601.949	308.771	0.96311	0.00026809	0.0016652	up	sp|Q556K9|DPM2_DICDI Dolichol phosphate-mannose biosynthesis regulatory protein OS=Dictyostelium discoideum GN=dpm2-1 PE=3 SV=1//1.11118e-21
Cla008831	2797.97	822.292	1.7667	3.6195e-15	1.4996e-13	up	sp|Q94KU5|PAP3_BRACM Plastid lipid-associated protein 3, chloroplastic OS=Brassica campestris GN=PAP3 PE=2 SV=1//4.13624e-97
Cla008834	182.756	80.5753	1.1815	0.0016903	0.0082377	up	sp|O82290|SKL2_ARATH Probable inactive shikimate kinase like 2, chloroplastic OS=Arabidopsis thaliana GN=SKL2 PE=2 SV=2//3.0338e-153
Cla008837	2151.45	1477.64	0.54202	0.011967	0.042273	up	sp|Q9M3T9|DAD1_BETPN Dolichyl-diphosphooligosaccharide--protein glycosyltransferase subunit DAD1 OS=Betula pendula GN=DAD1 PE=3 SV=1//1.71182e-74
Cla008844	4469.51	2900.49	0.62382	0.0030755	0.013755	up	sp|Q8GYA6|PS13B_ARATH 26S proteasome non-ATPase regulatory subunit 13 homolog B OS=Arabidopsis thaliana GN=RPN9B PE=1 SV=1//3.20928e-132
Cla008846	1319.53	679.694	0.95707	4.1032e-05	0.00032447	up	-//-
Cla008847	1615.52	663.362	1.2841	1.9954e-05	0.00016943	up	sp|Q9C6X2|SCAM4_ARATH Secretory carrier-associated membrane protein 4 OS=Arabidopsis thaliana GN=SCAMP4 PE=2 SV=1//3.92082e-121
Cla008848	281.92	124.386	1.1805	0.00281	0.012761	up	sp|P27774|KPPR_MESCR Phosphoribulokinase, chloroplastic OS=Mesembryanthemum crystallinum PE=2 SV=1//0
Cla008854	772.702	240.497	1.6839	1.3012e-10	2.9942e-09	up	sp|Q8VEH6|CBWD1_MOUSE COBW domain-containing protein 1 OS=Mus musculus GN=Cbwd1 PE=2 SV=1//2.19162e-52
Cla008861	31216	18443.3	0.75919	0.00018063	0.0011853	up	sp|Q6Z8C8|CDKF4_ORYSJ Cyclin-dependent kinase F-4 OS=Oryza sativa subsp. japonica GN=CDKF-4 PE=2 SV=1//0
Cla008862	10892.1	4513.89	1.2708	1.2818e-09	2.5067e-08	up	-//-
Cla008866	3394.53	987.213	1.7818	9.7267e-16	4.3363e-14	up	sp|Q94B60|CLPP4_ARATH ATP-dependent Clp protease proteolytic subunit 4, chloroplastic OS=Arabidopsis thaliana GN=CLPP4 PE=1 SV=1//3.50239e-134
Cla008874	16000.8	9952.36	0.68504	0.00091876	0.0048541	up	sp|O04066|ACBP_RICCO Acyl-CoA-binding protein OS=Ricinus communis PE=3 SV=1//2.56301e-42
Cla008887	1813.31	1234.59	0.5546	0.012209	0.042926	up	-//-
Cla008894	1801.37	851.381	1.0812	1.4396e-06	1.6018e-05	up	sp|Q1KZG4|FHIT_BOVIN Bis(5&apos;-adenosyl)-triphosphatase OS=Bos taurus GN=FHIT PE=2 SV=1//3.48097e-41
Cla008897	4157.28	2868.34	0.53543	0.011021	0.039488	up	sp|Q41009|TOC34_PEA Translocase of chloroplast 34 OS=Pisum sativum GN=TOC34 PE=1 SV=1//2.102e-166
Cla008898	4897.8	505.872	3.2753	1.1492e-11	3.1287e-10	up	sp|P10933|FENR1_PEA Ferredoxin--NADP reductase, leaf isozyme, chloroplastic OS=Pisum sativum GN=PETH PE=1 SV=1//0
Cla008905	2703.86	1646.11	0.71596	0.00099404	0.0052	up	sp|P55034|PSMD4_ARATH 26S proteasome non-ATPase regulatory subunit 4 homolog OS=Arabidopsis thaliana GN=RPN10 PE=1 SV=1//2.44857e-141
Cla008908	3046.27	912.257	1.7395	4.5629e-15	1.8633e-13	up	sp|O24030|PSA7_SOLLC Proteasome subunit alpha type-7 OS=Solanum lycopersicum GN=PAD1 PE=2 SV=1//2.71256e-151
Cla008910	6031.03	3201.39	0.91371	1.0215e-05	9.2359e-05	up	sp|U3KRF2|DHQS_ACTCH 3-dehydroquinate synthase, chloroplastic OS=Actinidia chinensis GN=DHQS PE=1 SV=2//0
Cla008918	2738.72	1152.52	1.2487	1.8083e-08	2.9137e-07	up	-//-
Cla008942	5685.01	1071.44	2.4076	5.2535e-11	1.3054e-09	up	sp|Q8K400|STXB5_MOUSE Syntaxin-binding protein 5 OS=Mus musculus GN=Stxbp5 PE=1 SV=3//1.17657e-12
Cla008944	7698.39	5362.78	0.52158	0.010321	0.037356	up	sp|P40619|HMGL_IPONI HMG1/2-like protein OS=Ipomoea nil PE=2 SV=1//2.71363e-18
Cla008952	306.261	146.728	1.0616	0.00083582	0.0044714	up	sp|F4JN26|MLH3_ARATH DNA mismatch repair protein MLH3 OS=Arabidopsis thaliana GN=MLH3 PE=2 SV=2//7.53329e-28
Cla008960	67.9513	0.315352	7.7514	2.5857e-12	7.6996e-11	up	-//-
Cla008961	1489.67	852.139	0.80583	0.0003641	0.0021627	up	sp|Q9FN02|PPP7_ARATH Serine/threonine-protein phosphatase 7 OS=Arabidopsis thaliana GN=PP7 PE=1 SV=1//0
Cla008972	1119.92	538.226	1.0571	7.2792e-06	6.8295e-05	up	sp|B3LF48|EHD2_ARATH EH domain-containing protein 2 OS=Arabidopsis thaliana GN=EHD2 PE=1 SV=1//0
Cla008987	491.647	298.819	0.71835	0.008292	0.031403	up	sp|O04928|CDS1_ARATH Phosphatidate cytidylyltransferase 1 OS=Arabidopsis thaliana GN=CDS1 PE=1 SV=1//1.0804e-92
Cla009015	1478.88	864.564	0.77446	0.00066293	0.0036364	up	sp|Q94F00|IMPL1_ARATH Phosphatase IMPL1, chloroplastic OS=Arabidopsis thaliana GN=IMPL1 PE=1 SV=2//0
Cla009043	446.803	227.071	0.9765	0.0007262	0.0039379	up	sp|O81263|KITH_ORYSJ Thymidine kinase OS=Oryza sativa subsp. japonica GN=TK PE=2 SV=2//1.45955e-92
Cla009079	72.4308	10.1131	2.8404	0.00014934	0.0010088	up	sp|Q9FTA0|GEML4_ARATH GEM-like protein 4 OS=Arabidopsis thaliana GN=At5g08350 PE=2 SV=1//7.72428e-78
Cla009080	157.228	71.9714	1.1274	0.0047421	0.019733	up	sp|Q9FMW6|GEML6_ARATH GEM-like protein 6 OS=Arabidopsis thaliana GN=At5g23350 PE=2 SV=2//1.28761e-70
Cla009088	3772.15	2510.85	0.58721	0.0048676	0.02015	up	sp|Q9SDS7|VATC_ARATH V-type proton ATPase subunit C OS=Arabidopsis thaliana GN=VHA-C PE=1 SV=1//0
Cla009094	1509	664.9	1.1824	1.8847e-06	2.0468e-05	up	sp|Q8LPN7|RNG1L_ARATH E3 ubiquitin-protein ligase RING1-like OS=Arabidopsis thaliana GN=At3g19950 PE=1 SV=1//5.1748e-91
Cla009097	330.492	192.415	0.78039	0.0095655	0.035235	up	sp|Q6NQ83|PP247_ARATH Pentatricopeptide repeat-containing protein At3g22470, mitochondrial OS=Arabidopsis thaliana GN=At3g22470 PE=2 SV=1//1.13973e-35
Cla009102	1517.77	816.299	0.89479	7.3479e-05	0.00054073	up	sp|Q8GT66|TIC40_PEA Protein TIC 40, chloroplastic OS=Pisum sativum GN=TIC40 PE=1 SV=1//8.59511e-20
Cla009122	8243.28	342.564	4.5888	8.4371e-79	1.1209e-75	up	sp|P49293|PSY_CUCME Phytoene synthase, chloroplastic OS=Cucumis melo GN=PSY PE=2 SV=1//0
Cla009135	12690.1	4307.75	1.5587	9.0962e-14	3.2075e-12	up	sp|Q06197|IDHC_SOYBN Isocitrate dehydrogenase [NADP] OS=Glycine max GN=IDH1 PE=2 SV=2//2.69959e-79
Cla009141	7836.66	3559.64	1.1385	0.00014704	0.00099564	up	sp|Q8LGG8|USPAL_ARATH Universal stress protein A-like protein OS=Arabidopsis thaliana GN=At3g01520 PE=1 SV=2//1.21709e-14
Cla009144	2584.19	843.945	1.6145	1.4118e-12	4.3417e-11	up	sp|Q9FHQ3|HS157_ARATH 15.7 kDa heat shock protein, peroxisomal OS=Arabidopsis thaliana GN=HSP15.7 PE=2 SV=1//1.07587e-45
Cla009145	197.329	73.2665	1.4294	0.00014954	0.0010098	up	sp|Q9FGH9|E70B1_ARATH Exocyst complex component EXO70B1 OS=Arabidopsis thaliana GN=EXO70B1 PE=1 SV=1//1.93445e-120
Cla009149	896.18	513.805	0.80257	0.00092377	0.0048778	up	-//-
Cla009150	1491.81	984.614	0.59943	0.0082406	0.03125	up	-//-
Cla009157	1531.55	993.225	0.6248	0.0054177	0.022029	up	sp|Q6NZW8|AR8BA_DANRE ADP-ribosylation factor-like protein 8B-A OS=Danio rerio GN=arl8ba PE=2 SV=1//3.26608e-81
Cla009169	2275.02	1479.77	0.6205	0.0045696	0.019119	up	sp|Q8GUI6|JMJ14_ARATH Probable lysine-specific demethylase JMJ14 OS=Arabidopsis thaliana GN=JMJ14 PE=1 SV=1//1.7623e-43
Cla009173	25458.8	3370.14	2.9173	1.8032e-40	5.0612e-38	up	-//-
Cla009181	13868.7	5441	1.3499	1.0244e-10	2.4187e-09	up	sp|P46486|PSAF_FLATR Photosystem I reaction center subunit III, chloroplastic OS=Flaveria trinervia GN=PSAF PE=2 SV=1//1.07569e-88
Cla009183	168.681	37.6165	2.1649	1.5127e-06	1.6766e-05	up	sp|Q9FKE9|RHD32_ARATH Protein ROOT HAIR DEFECTIVE 3 homolog 2 OS=Arabidopsis thaliana GN=At5g45160 PE=2 SV=1//0
Cla009188	801.907	283.133	1.502	9.7421e-09	1.6453e-07	up	sp|Q6PGS5|TM56B_XENLA Transmembrane protein 56-B OS=Xenopus laevis GN=tmem56-b PE=2 SV=1//3.79625e-11
Cla009194	619.449	319.327	0.95595	0.00033957	0.0020321	up	-//-
Cla009202	311.43	185.525	0.7473	0.012231	0.042986	up	-//-
Cla009204	4746.07	2590.53	0.87348	0.00094469	0.0049685	up	sp|Q5EBF1|5NTC_XENTR Cytosolic purine 5&apos;-nucleotidase OS=Xenopus tropicalis GN=nt5c2 PE=2 SV=1//1.32039e-61
Cla009216	4472.93	2586.38	0.79029	0.00019578	0.0012688	up	sp|Q0VCZ3|YTHD2_BOVIN YTH domain-containing family protein 2 OS=Bos taurus GN=YTHDF2 PE=2 SV=1//1.67495e-57
Cla009222	3185.22	2.76252	10.171	1.6952e-18	9.9949e-17	up	sp|Q9FXB2|GOLS2_ARATH Galactinol synthase 2 OS=Arabidopsis thaliana GN=GOLS2 PE=1 SV=1//1.0552e-178
Cla009229	3261.37	135.812	4.5858	1.8598e-19	1.1879e-17	up	sp|P22242|DRPE_CRAPL Desiccation-related protein PCC13-62 OS=Craterostigma plantagineum PE=2 SV=1//7.99917e-123
Cla009240	740.233	100.019	2.8877	7.8594e-19	4.8191e-17	up	sp|Q9LUQ5|UBC25_ARATH Probable ubiquitin-conjugating enzyme E2 25 OS=Arabidopsis thaliana GN=UBC25 PE=2 SV=1//2.03594e-77
Cla009241	6475.96	3402.12	0.92866	0.004874	0.020172	up	sp|Q1ZXF1|ECHM_DICDI Probable enoyl-CoA hydratase, mitochondrial OS=Dictyostelium discoideum GN=echs1 PE=3 SV=1//2.2527e-33
Cla009256	1427.84	802.915	0.83052	0.00032874	0.0019792	up	sp|A8MS68|PLPD1_ARATH Dihydrolipoyl dehydrogenase 1, chloroplastic OS=Arabidopsis thaliana GN=LPD1 PE=2 SV=1//0
Cla009263	5535.73	685.518	3.0135	1.3696e-39	3.5445e-37	up	sp|O22264|MYB12_ARATH Transcription factor MYB12 OS=Arabidopsis thaliana GN=MYB12 PE=2 SV=1//4.82432e-65
Cla009278	469.985	203.942	1.2045	2.479e-05	0.00020635	up	-//-
Cla009285	991.424	569.371	0.80013	0.00094948	0.0049924	up	sp|Q84JZ6|MORF3_ARATH Multiple organellar RNA editing factor 3, mitochondrial OS=Arabidopsis thaliana GN=MORF3 PE=1 SV=1//4.23296e-89
Cla009293	831.702	505.853	0.71735	0.0034497	0.015109	up	sp|Q22799|DYL1_CAEEL Dynein light chain 1, cytoplasmic OS=Caenorhabditis elegans GN=dlc-1 PE=1 SV=1//2.30398e-25
Cla009294	8718.42	4763.48	0.87205	0.0094931	0.034981	up	sp|Q39659|MFPA_CUCSA Glyoxysomal fatty acid beta-oxidation multifunctional protein MFP-a OS=Cucumis sativus PE=1 SV=1//0
Cla009305	231.836	101.368	1.1935	0.00059345	0.0033053	up	sp|Q8L9P8|RLF33_ARATH Protein RALF-like 33 OS=Arabidopsis thaliana GN=RALFL33 PE=2 SV=1//4.88754e-43
Cla009327	2931.38	1181.33	1.3112	2.2945e-09	4.3055e-08	up	-//-
Cla009335	10545.4	3309.54	1.6719	2.4971e-15	1.0565e-13	up	sp|P93092|ACP1_CASGL Acyl carrier protein 1, chloroplastic OS=Casuarina glauca GN=ACP1 PE=2 SV=1//2.02896e-36
Cla009346	7107.34	1889.22	1.9115	6.9663e-19	4.3113e-17	up	sp|O78328|DXS_CAPAN Probable 1-deoxy-D-xylulose-5-phosphate synthase, chloroplastic OS=Capsicum annuum GN=TKT2 PE=2 SV=1//3.92586e-64
Cla009347	16804.6	5208.14	1.69	8.1821e-16	3.689e-14	up	sp|O78328|DXS_CAPAN Probable 1-deoxy-D-xylulose-5-phosphate synthase, chloroplastic OS=Capsicum annuum GN=TKT2 PE=2 SV=1//0
Cla009348	9095.43	2639.76	1.7847	5.9502e-17	3.0404e-15	up	sp|O78328|DXS_CAPAN Probable 1-deoxy-D-xylulose-5-phosphate synthase, chloroplastic OS=Capsicum annuum GN=TKT2 PE=2 SV=1//1.11388e-92
Cla009351	2436.64	814.158	1.5815	2.2259e-12	6.6702e-11	up	-//-
Cla009361	1220.23	723.689	0.75371	0.0013378	0.0067371	up	sp|Q9C5D2|FBL4_ARATH F-box/LRR-repeat protein 4 OS=Arabidopsis thaliana GN=FBL4 PE=2 SV=1//0
Cla009362	2178.95	1391.91	0.64657	0.0028369	0.012849	up	sp|Q06138|CAB39_MOUSE Calcium-binding protein 39 OS=Mus musculus GN=Cab39 PE=1 SV=2//9.8945e-80
Cla009369	1396.09	750.499	0.89547	0.0023977	0.011143	up	sp|P0C8Q9|Y5902_ARATH Uncharacterized protein At5g19025 OS=Arabidopsis thaliana GN=At5g19025 PE=2 SV=3//5.61716e-66
Cla009370	3475.81	2233.37	0.63813	0.0026324	0.01208	up	sp|Q5R533|SERC3_PONAB Serine incorporator 3 OS=Pongo abelii GN=SERINC3 PE=2 SV=1//1.46546e-46
Cla009379	63243.1	29159.2	1.117	1.2677e-07	1.7387e-06	up	sp|P24805|TSJT1_TOBAC Stem-specific protein TSJT1 OS=Nicotiana tabacum GN=TSJT1 PE=2 SV=1//1.44619e-34
Cla009380	1406.09	843.863	0.73661	0.0020137	0.0095864	up	sp|Q5BPJ0|TBL11_ARATH Protein trichome birefringence-like 11 OS=Arabidopsis thaliana GN=TBL11 PE=2 SV=1//0
Cla009381	3858.8	1727	1.1599	6.9157e-08	9.9939e-07	up	sp|Q9M7T0|PRX2F_ARATH Peroxiredoxin-2F, mitochondrial OS=Arabidopsis thaliana GN=PRXIIF PE=1 SV=2//3.08175e-117
Cla009385	982.57	275.371	1.8352	6.0761e-13	1.9753e-11	up	sp|Q84MC0|UGPI4_ARATH Uncharacterized GPI-anchored protein At3g06035 OS=Arabidopsis thaliana GN=At3g06035 PE=2 SV=1//5.38892e-60
Cla009386	879.208	515.186	0.77111	0.010059	0.036625	up	sp|Q9MA90|PNC1_ARATH Peroxisomal adenine nucleotide carrier 1 OS=Arabidopsis thaliana GN=PNC1 PE=1 SV=1//5.64716e-146
Cla009401	1565.54	954.143	0.71438	0.001809	0.0087335	up	sp|Q5XF36|KMS1_ARATH Vacuole membrane protein KMS1 OS=Arabidopsis thaliana GN=KMS1 PE=1 SV=1//5.8594e-171
Cla009403	24894.5	5102.96	2.2864	1.2864e-10	2.9636e-09	up	sp|Q09893|YAI5_SCHPO Uncharacterized protein C24B11.05 OS=Schizosaccharomyces pombe (strain 972 / ATCC 24843) GN=SPAC24B11.05 PE=3 SV=1//1.61188e-18
Cla009410	5309.85	2859.7	0.89281	2.2407e-05	0.00018809	up	sp|Q43072|HIS7_PEA Imidazoleglycerol-phosphate dehydratase OS=Pisum sativum GN=HIS3 PE=2 SV=1//1.7091e-126
Cla009418	1060.23	408.007	1.3777	2.4001e-06	2.5387e-05	up	-//-
Cla009419	62.9418	14.1704	2.1511	0.0035059	0.015318	up	-//-
Cla009452	418.813	9.54759	5.455	5.0791e-39	1.2652e-36	up	-//-
Cla009477	819.375	537.469	0.60834	0.010676	0.038458	up	-//-
Cla009478	2886.13	932.346	1.6302	5.7944e-08	8.5725e-07	up	-//-
Cla009482	706.92	307.467	1.2011	3.7173e-06	3.766e-05	up	sp|Q9XIP8|CDI_ARATH Protein CDI OS=Arabidopsis thaliana GN=CDI PE=2 SV=1//1.01578e-152
Cla009491	6281.9	3211.4	0.968	3.9027e-06	3.922e-05	up	sp|Q55480|YZ37_SYNY3 Uncharacterized sugar kinase slr0537 OS=Synechocystis sp. (strain PCC 6803 / Kazusa) GN=slr0537 PE=3 SV=1//1.26749e-38
Cla009541	772.62	352.257	1.1331	1.0547e-05	9.4931e-05	up	sp|O82251|TI202_ARATH Protein TIC 20-II, chloroplastic OS=Arabidopsis thaliana GN=TIC20-II PE=2 SV=1//7.64957e-72
Cla009603	3139.61	1605.11	0.96791	6.3017e-06	6.0058e-05	up	sp|P80299|HYES_RAT Bifunctional epoxide hydrolase 2 OS=Rattus norvegicus GN=Ephx2 PE=1 SV=1//6.22447e-38
Cla009604	4260.57	2985.49	0.51308	0.013901	0.04773	up	sp|Q93Y22|COPD_ARATH Coatomer subunit delta OS=Arabidopsis thaliana GN=At5g05010 PE=1 SV=2//0
Cla009606	4986.65	3259.39	0.61347	0.0036285	0.01576	up	sp|Q9SKU1|CLC1_ARATH Clathrin light chain 1 OS=Arabidopsis thaliana GN=At2g20760 PE=2 SV=1//9.61036e-51
Cla009608	630.544	300.826	1.0677	6.6166e-05	0.00049347	up	sp|Q84WQ5|CBSX5_ARATH CBS domain-containing protein CBSX5 OS=Arabidopsis thaliana GN=CBSX5 PE=2 SV=2//1.57324e-83
Cla009622	3084.9	2149.66	0.52111	0.014145	0.048416	up	sp|Q2MHE4|HT1_ARATH Serine/threonine-protein kinase HT1 OS=Arabidopsis thaliana GN=HT1 PE=1 SV=1//9.25972e-111
Cla009628	857.756	530.669	0.69276	0.0034455	0.015101	up	sp|Q84TE9|DOF53_ARATH Dof zinc finger protein DOF5.3 OS=Arabidopsis thaliana GN=DOF5.3 PE=2 SV=1//1.90057e-32
Cla009630	5069.16	3172.38	0.67618	0.0012764	0.0064774	up	sp|Q8VZD4|DEG15_ARATH Glyoxysomal processing protease, glyoxysomal OS=Arabidopsis thaliana GN=DEG15 PE=1 SV=2//0
Cla009632	1621.38	564.436	1.5223	1.2048e-10	2.795e-09	up	sp|Q9FKW0|RNG1A_ARATH Putative E3 ubiquitin-protein ligase RING1a OS=Arabidopsis thaliana GN=RING1A PE=1 SV=2//6.23821e-59
Cla009639	165.429	35.9972	2.2003	3.4699e-07	4.3464e-06	up	-//-
Cla009642	4747.51	2636.01	0.84882	6.9299e-05	0.00051414	up	sp|P59910|DJB13_HUMAN DnaJ homolog subfamily B member 13 OS=Homo sapiens GN=DNAJB13 PE=2 SV=1//6.23171e-74
Cla009644	1339.2	601.794	1.154	0.00054523	0.0030815	up	sp|P21727|TPT_PEA Triose phosphate/phosphate translocator, chloroplastic OS=Pisum sativum PE=1 SV=1//0
Cla009648	85.8926	15.1051	2.5075	6.1876e-05	0.00046443	up	sp|F4HY61|NAC10_ARATH NAC domain-containing protein 10 OS=Arabidopsis thaliana GN=NAC010 PE=2 SV=1//5.31995e-77
Cla009650	86.8236	29.6785	1.5487	0.0033912	0.014908	up	sp|Q9SGP6|GRXC9_ARATH Glutaredoxin-C9 OS=Arabidopsis thaliana GN=GRXC9 PE=1 SV=1//5.13034e-35
Cla009654	340.841	130.415	1.386	1.1376e-05	0.00010166	up	sp|Q9P7W0|OPA3_SCHPO OPA3-like protein OS=Schizosaccharomyces pombe (strain 972 / ATCC 24843) GN=SPBC1703.11 PE=3 SV=1//2.40096e-07
Cla009670	4096.71	1400.86	1.5482	5.6678e-13	1.8456e-11	up	sp|P93162|CHLI_SOYBN Magnesium-chelatase subunit ChlI, chloroplastic OS=Glycine max GN=CHLI PE=2 SV=1//0
Cla009674	94.0736	39.6391	1.2469	0.013437	0.046441	up	sp|Q6NMR9|GDL84_ARATH GDSL esterase/lipase At5g45920 OS=Arabidopsis thaliana GN=At5g45920 PE=2 SV=1//2.11951e-120
Cla009678	3082.87	939.635	1.7141	7.3559e-15	2.9007e-13	up	sp|Q9FXJ1|GDL6_ARATH GDSL esterase/lipase At1g28570 OS=Arabidopsis thaliana GN=At1g28570 PE=2 SV=1//4.07472e-125
Cla009686	1994.23	891.361	1.1618	1.9915e-07	2.6335e-06	up	sp|P82244|RK34_SPIOL 50S ribosomal protein L34, chloroplastic OS=Spinacia oleracea GN=RPL34 PE=1 SV=1//1.64878e-30
Cla009693	2013.65	1361.16	0.56498	0.008455	0.031881	up	sp|Q9S7R3|LSH10_ARATH Protein LIGHT-DEPENDENT SHORT HYPOCOTYLS 10 OS=Arabidopsis thaliana GN=LSH10 PE=1 SV=1//7.77728e-69
Cla009719	980.414	522.067	0.90916	0.0002353	0.0014891	up	-//-
Cla009742	24293.1	15344.8	0.6628	0.0011276	0.0058062	up	sp|Q54GB2|CTSL2_DICDI CTD small phosphatase-like protein 2 OS=Dictyostelium discoideum GN=ctdspl2 PE=3 SV=1//4.66566e-42
Cla009745	3660.61	1843.91	0.98932	4.1344e-06	4.126e-05	up	sp|Q940S5|COPZ1_ARATH Coatomer subunit zeta-1 OS=Arabidopsis thaliana GN=At1g60970 PE=2 SV=1//6.20662e-49
Cla009746	1574.75	957.336	0.71803	0.0013349	0.0067259	up	sp|Q54YS0|Y8111_DICDI DNA-binding protein DDB_G0278111 OS=Dictyostelium discoideum GN=DDB_G0278111 PE=3 SV=2//1.84489e-16
Cla009747	1566.53	653.197	1.262	3.9174e-08	5.982e-07	up	sp|Q9SVV6|KCO6_ARATH Two-pore potassium channel 3 OS=Arabidopsis thaliana GN=TPK3 PE=2 SV=1//3.01381e-141
Cla009749	504.865	315.219	0.67954	0.01261	0.044039	up	-//-
Cla009750	1394.97	831.595	0.74628	0.0013239	0.0066825	up	sp|Q96PB1|CASD1_HUMAN CAS1 domain-containing protein 1 OS=Homo sapiens GN=CASD1 PE=2 SV=1//9.71543e-29
Cla009751	1486.94	942.879	0.6572	0.0031523	0.014047	up	sp|Q0WVX5|SSY4_ARATH Probable starch synthase 4, chloroplastic/amyloplastic OS=Arabidopsis thaliana GN=SS4 PE=2 SV=1//3.28851e-96
Cla009752	3417.3	280.913	3.6047	3.3181e-44	1.1401e-41	up	sp|P09756|CB23_SOYBN Chlorophyll a-b binding protein 3, chloroplastic OS=Glycine max GN=CAB3 PE=3 SV=1//0
Cla009753	257.637	136.163	0.92001	0.0079395	0.030333	up	sp|P09756|CB23_SOYBN Chlorophyll a-b binding protein 3, chloroplastic OS=Glycine max GN=CAB3 PE=3 SV=1//0
Cla009760	801.961	217.509	1.8825	0.00021278	0.001363	up	-//-
Cla009761	1664.59	594.962	1.4843	9.0928e-08	1.2869e-06	up	sp|Q1XDB4|YCF23_PYRYE Uncharacterized protein ycf23 OS=Pyropia yezoensis GN=ycf23 PE=3 SV=1//2.64395e-54
Cla009763	505.404	317.993	0.66844	0.012512	0.043798	up	sp|Q8H124|Y2446_ARATH Uncharacterized protein At2g34460, chloroplastic OS=Arabidopsis thaliana GN=At2g34460 PE=2 SV=1//2.75974e-125
Cla009769	1731.53	1072.97	0.69043	0.0021902	0.01031	up	sp|Q93Y37|MNS3_ARATH Mannosyl-oligosaccharide 1,2-alpha-mannosidase MNS3 OS=Arabidopsis thaliana GN=MNS3 PE=2 SV=1//0
Cla009770	86.1959	10.2114	3.0774	8.8617e-07	1.0267e-05	up	-//-
Cla009771	589.113	267.434	1.1394	2.2227e-05	0.0001869	up	-//-
Cla009772	1585.76	669.288	1.2445	5.1311e-08	7.6824e-07	up	-//-
Cla009782	21012.4	6233.65	1.7531	2.6808e-15	1.1247e-13	up	sp|Q9LRR9|GLO1_ARATH Peroxisomal (S)-2-hydroxy-acid oxidase GLO1 OS=Arabidopsis thaliana GN=GLO1 PE=1 SV=1//0
Cla009789	2430.61	1167.73	1.0576	1.2578e-06	1.4138e-05	up	sp|Q9C7S7|ERO1_ARATH Endoplasmic reticulum oxidoreductin-1 OS=Arabidopsis thaliana GN=AERO1 PE=1 SV=1//0
Cla009801	4674.68	2206.5	1.0831	4.57e-07	5.5803e-06	up	sp|F4IHY7|PTA12_ARATH Protein PLASTID TRANSCRIPTIONALLY ACTIVE 12 OS=Arabidopsis thaliana GN=PTAC12 PE=1 SV=1//1.5382e-176
Cla009802	3588.27	1918.26	0.90349	2.695e-05	0.00022248	up	sp|A7XDQ9|B3GTK_ARATH Probable beta-1,3-galactosyltransferase 20 OS=Arabidopsis thaliana GN=B3GALT20 PE=2 SV=1//0
Cla009814	2176.97	726.457	1.5834	1.1156e-09	2.2231e-08	up	sp|Q9SUI5|PSAK_ARATH Photosystem I reaction center subunit psaK, chloroplastic OS=Arabidopsis thaliana GN=PSAK PE=2 SV=2//3.22311e-52
Cla009816	33880.5	20476.4	0.72649	0.00033731	0.0020216	up	sp|Q42093|AB2C_ARATH ABC transporter C family member 2 OS=Arabidopsis thaliana GN=ABCC2 PE=1 SV=2//0
Cla009835	703.97	20.2819	5.1172	2.8202e-49	1.405e-46	up	sp|Q6YZA9|GL82_ORYSJ Germin-like protein 8-2 OS=Oryza sativa subsp. japonica GN=GER3 PE=2 SV=1//1.17189e-69
Cla009848	230.477	40.5647	2.5063	0.001779	0.0086005	up	sp|Q9SVG4|RETOL_ARATH Reticuline oxidase-like protein OS=Arabidopsis thaliana GN=At4g20830 PE=1 SV=2//4.78125e-171
Cla009866	1335.13	791.22	0.75482	0.0010832	0.0056084	up	sp|Q94K71|GPPL2_ARATH Haloacid dehalogenase-like hydrolase domain-containing protein At3g48420 OS=Arabidopsis thaliana GN=At3g48420 PE=1 SV=1//1.22832e-15
Cla009871	135.028	55.0268	1.2951	0.0030292	0.01359	up	sp|Q9FLC6|ATL73_ARATH RING-H2 finger protein ATL73 OS=Arabidopsis thaliana GN=ATL73 PE=2 SV=1//1.53863e-17
Cla009879	1575.48	1031.19	0.61149	0.0071894	0.027966	up	sp|O64765|UAP2_ARATH UDP-N-acetylglucosamine diphosphorylase 2 OS=Arabidopsis thaliana GN=GLCNAC1PUT2 PE=1 SV=1//0
Cla009891	8772.7	850.103	3.3673	4.5022e-47	1.8692e-44	up	sp|Q5E9D6|HDHD3_BOVIN Haloacid dehalogenase-like hydrolase domain-containing protein 3 OS=Bos taurus GN=HDHD3 PE=2 SV=1//8.15628e-32
Cla009899	15215.1	4805.13	1.6629	1.9927e-15	8.5214e-14	up	sp|Q922Q1|MARC2_MOUSE Mitochondrial amidoxime reducing component 2 OS=Mus musculus GN=Marc2 PE=1 SV=1//2.10644e-19
Cla009901	1217.21	687.607	0.82392	0.00046694	0.0026871	up	-//-
Cla009919	1019.66	207.511	2.2968	1.4298e-18	8.4798e-17	up	-//-
Cla009925	761.319	498.585	0.61066	0.011676	0.041445	up	sp|Q9ZVJ4|CYP22_ARATH Peptidyl-prolyl cis-trans isomerase CYP22 OS=Arabidopsis thaliana GN=CYP22 PE=2 SV=1//2.93675e-115
Cla009930	3232.48	139.21	4.5373	5.6764e-10	1.1845e-08	up	-//-
Cla009945	6213.7	2383.29	1.3825	7.1369e-11	1.7387e-09	up	-//-
Cla009947	74755.6	38568.1	0.95477	0.00038945	0.0022968	up	sp|P51074|ANX4_FRAAN Annexin-like protein RJ4 OS=Fragaria ananassa PE=2 SV=2//6.76959e-149
Cla009948	12668.8	7305.7	0.79418	0.007899	0.030207	up	sp|P51074|ANX4_FRAAN Annexin-like protein RJ4 OS=Fragaria ananassa PE=2 SV=2//7.8642e-140
Cla009984	1047.98	456.81	1.1979	6.8337e-07	8.0916e-06	up	sp|Q9FIX2|AIG2L_ARATH AIG2-like protein OS=Arabidopsis thaliana GN=At5g39720 PE=1 SV=1//5.35314e-35
Cla009985	781.141	494.176	0.66056	0.0090733	0.033677	up	sp|O23461|ARAK_ARATH L-arabinokinase OS=Arabidopsis thaliana GN=ARA1 PE=1 SV=1//2.39714e-115
Cla009996	1948.99	700.109	1.4771	1.6271e-10	3.6973e-09	up	sp|P09886|HS21C_PEA Small heat shock protein, chloroplastic OS=Pisum sativum GN=HSP21 PE=2 SV=1//3.09696e-36
Cla010004	402.948	191.713	1.0716	0.00027158	0.0016818	up	-//-
Cla010030	2083.3	1301.18	0.67905	0.001651	0.0080698	up	sp|Q9C5S1|MKP1_ARATH Protein-tyrosine-phosphatase MKP1 OS=Arabidopsis thaliana GN=MKP1 PE=1 SV=1//1.14309e-08
Cla010048	5791.23	2385.39	1.2796	9.402e-10	1.9138e-08	up	-//-
Cla010051	9675.25	5773.54	0.74484	0.00031702	0.0019167	up	sp|Q9S7E9|GGT2_ARATH Glutamate--glyoxylate aminotransferase 2 OS=Arabidopsis thaliana GN=GGAT2 PE=1 SV=1//0
Cla010058	4976.73	77.1671	6.0111	9.9291e-108	3.9573e-104	up	sp|P04635|LIP_STAHY Lipase OS=Staphylococcus hyicus GN=lip PE=1 SV=1//6.69865e-24
Cla010062	19013.5	11550.8	0.71903	0.00034607	0.0020648	up	sp|Q8LPT9|GWD1_CITRE Alpha-glucan water dikinase, chloroplastic OS=Citrus reticulata GN=R1 PE=2 SV=1//0
Cla010086	3236.51	1735.1	0.89942	0.00013565	0.00092864	up	sp|P27141|CAHC_TOBAC Carbonic anhydrase, chloroplastic OS=Nicotiana tabacum PE=2 SV=1//1.25461e-134
Cla010095	175.144	83.8228	1.0631	0.0096067	0.035335	up	sp|O80742|PUB19_ARATH U-box domain-containing protein 19 OS=Arabidopsis thaliana GN=PUB19 PE=2 SV=1//6.59859e-175
Cla010103	465.716	141.054	1.7232	4.4766e-05	0.00034971	up	sp|Q8GW38|ATL47_ARATH RING-H2 finger protein ATL47 OS=Arabidopsis thaliana GN=ATL47 PE=2 SV=1//4.39535e-62
Cla010114	298.836	115.604	1.3702	2.5462e-05	0.00021159	up	sp|P40761|YUXK_BACSU Uncharacterized protein YuxK OS=Bacillus subtilis (strain 168) GN=yuxK PE=3 SV=1//8.70568e-10
Cla010117	674.737	427.587	0.65811	0.0085552	0.032192	up	sp|Q944S1|RH22_ARATH DEAD-box ATP-dependent RNA helicase 22 OS=Arabidopsis thaliana GN=RH22 PE=2 SV=1//0
Cla010131	310.097	177.255	0.80689	0.009225	0.034164	up	-//-
Cla010148	5360.38	1815.01	1.5624	2.6885e-13	9.0655e-12	up	sp|Q94AX2|PTST_ARATH Protein PTST, chloroplastic OS=Arabidopsis thaliana GN=PTST PE=1 SV=1//2.03153e-12
Cla010152	2849.71	656.554	2.1178	2.7732e-20	1.9256e-18	up	-//-
Cla010160	8209.06	1230.84	2.7376	5.1429e-35	1.0352e-32	up	sp|Q94A41|AMY3_ARATH Alpha-amylase 3, chloroplastic OS=Arabidopsis thaliana GN=AMY3 PE=2 SV=1//0
Cla010161	83.7673	20.1951	2.0524	0.00030908	0.0018756	up	sp|P15722|PLY59_SOLLC Probable pectate lyase P59 OS=Solanum lycopersicum GN=LAT59 PE=2 SV=1//0
Cla010162	191.653	22.109	3.1158	1.1031e-09	2.2026e-08	up	sp|Q9CAR3|KINGL_ARATH SNF1-related protein kinase regulatory subunit gamma-1-like OS=Arabidopsis thaliana GN=CBSCBS2 PE=1 SV=1//1.77892e-55
Cla010163	26799.2	13241	1.0172	5.7009e-07	6.8438e-06	up	sp|P42745|UBC2_ARATH Ubiquitin-conjugating enzyme E2 2 OS=Arabidopsis thaliana GN=UBC2 PE=2 SV=1//1.98125e-110
Cla010164	69350.9	45768	0.59958	0.0021655	0.010212	up	sp|P42745|UBC2_ARATH Ubiquitin-conjugating enzyme E2 2 OS=Arabidopsis thaliana GN=UBC2 PE=2 SV=1//1.98125e-110
Cla010166	3096.98	1593.77	0.95842	6.7151e-06	6.3663e-05	up	sp|Q9M9S6|UTR3_ARATH UDP-galactose/UDP-glucose transporter 3 OS=Arabidopsis thaliana GN=UTR3 PE=1 SV=1//0
Cla010168	463.359	278.793	0.73294	0.0063136	0.025078	up	-//-
Cla010170	1797.43	996.309	0.85127	0.00013673	0.00093471	up	sp|Q9LFD5|BPA1_ARATH Binding partner of ACD11 1 OS=Arabidopsis thaliana GN=BPA1 PE=1 SV=1//2.23091e-38
Cla010177	503.337	280.326	0.84442	0.0022984	0.010752	up	sp|Q54ML6|MOG1_DICDI Probable ran guanine nucleotide release factor OS=Dictyostelium discoideum GN=mog1 PE=3 SV=1//7.22741e-23
Cla010180	1037.67	526.928	0.97766	5.2765e-05	0.00040349	up	-//-
Cla010199	1314.61	382.541	1.7809	1.1821e-12	3.6636e-11	up	-//-
Cla010217	2470.98	1591.94	0.6343	0.0032129	0.014276	up	sp|Q9AXJ4|IF5A_MANES Eukaryotic translation initiation factor 5A OS=Manihot esculenta PE=2 SV=2//4.40253e-108
Cla010241	3242.89	1240.98	1.3858	2.0622e-10	4.5663e-09	up	-//-
Cla010242	2820.35	1709.2	0.72255	0.00062308	0.0034491	up	sp|Q9M8T3|Y2910_ARATH Putative gamma-glutamylcyclotransferase At3g02910 OS=Arabidopsis thaliana GN=At3g02910 PE=2 SV=2//6.55461e-66
Cla010245	3820.24	1184.82	1.689	1.5599e-14	5.9323e-13	up	-//-
Cla010246	2627.87	1765.97	0.57343	0.0082051	0.031145	up	-//-
Cla010262	5362.73	389.958	3.7816	0.013158	0.045643	up	sp|Q9FX85|PER10_ARATH Peroxidase 10 OS=Arabidopsis thaliana GN=PER10 PE=1 SV=1//2.91697e-127
Cla010265	6488.98	3314.99	0.96899	0.00022027	0.0014046	up	-//-
Cla010271	2688.59	1729.39	0.63659	0.0039042	0.016738	up	sp|Q93Z70|ARGC_ARATH Probable N-acetyl-gamma-glutamyl-phosphate reductase, chloroplastic OS=Arabidopsis thaliana GN=At2g19940 PE=1 SV=2//0
Cla010275	14604.3	5960.67	1.2928	1.3406e-06	1.4992e-05	up	-//-
Cla010277	288.785	49.8851	2.5333	3.2957e-12	9.687e-11	up	-//-
Cla010278	5112.45	3554.73	0.52427	0.011059	0.039604	up	sp|Q8L3W1|VRN1_ARATH B3 domain-containing transcription factor VRN1 OS=Arabidopsis thaliana GN=VRN1 PE=1 SV=1//1.08499e-119
Cla010292	681.613	383.249	0.83067	0.0010087	0.0052689	up	sp|Q9XIA7|TOM6_ARATH Mitochondrial import receptor subunit TOM6 homolog OS=Arabidopsis thaliana GN=TOM6 PE=1 SV=1//4.01871e-26
Cla010297	215.535	54.7241	1.9777	2.7857e-07	3.5609e-06	up	sp|Q94B35|ISPH_ARATH 4-hydroxy-3-methylbut-2-enyl diphosphate reductase, chloroplastic OS=Arabidopsis thaliana GN=ISPH PE=2 SV=1//0
Cla010310	5161.3	2050.94	1.3315	2.8064e-10	6.0921e-09	up	sp|Q9LVQ0|PME31_ARATH Pectinesterase 31 OS=Arabidopsis thaliana GN=PME31 PE=1 SV=1//0
Cla010311	390.312	179.467	1.1209	0.00012884	0.0008858	up	sp|Q9LQY3|P24D9_ARATH Transmembrane emp24 domain-containing protein p24delta9 OS=Arabidopsis thaliana GN=At1g26690 PE=2 SV=1//3.04548e-97
Cla010316	290.032	10.0806	4.8466	0.00030125	0.0018358	up	sp|Q8GWP0|MYB39_ARATH Transcription factor MYB39 OS=Arabidopsis thaliana GN=MYB39 PE=2 SV=1//1.39396e-66
Cla010317	538.642	268.573	1.004	0.00026857	0.0016668	up	sp|Q9FLJ2|NC100_ARATH NAC domain-containing protein 100 OS=Arabidopsis thaliana GN=NAC100 PE=2 SV=1//3.49721e-94
Cla010323	2612.36	1747.64	0.57995	0.010771	0.038744	up	sp|P0C8Q9|Y5902_ARATH Uncharacterized protein At5g19025 OS=Arabidopsis thaliana GN=At5g19025 PE=2 SV=3//4.5273e-22
Cla010325	3504.09	2210.78	0.66449	0.0021573	0.01018	up	sp|P0CH30|RING1_GOSHI E3 ubiquitin-protein ligase RING1 OS=Gossypium hirsutum GN=RING1 PE=1 SV=1//2.58018e-19
Cla010328	7560.04	2546.93	1.5696	2.1661e-06	2.3207e-05	up	sp|Q1PDW5|FTSH6_ARATH ATP-dependent zinc metalloprotease FTSH 6, chloroplastic OS=Arabidopsis thaliana GN=FTSH6 PE=2 SV=1//0
Cla010329	78017.4	769.159	6.6644	7.9164e-96	1.972e-92	up	sp|Q7M438|RNDI_DICDI Ribonuclease DdI OS=Dictyostelium discoideum GN=ddiA PE=1 SV=3//6.69223e-24
Cla010331	4318.03	919.907	2.2308	2.1207e-05	0.00017892	up	sp|Q9LJW5|MIF2_ARATH Mini zinc finger protein 2 OS=Arabidopsis thaliana GN=MIF2 PE=1 SV=1//2.48583e-32
Cla010333	10719.9	3525.23	1.6045	1.3339e-11	3.5824e-10	up	sp|P41098|RL34_TOBAC 60S ribosomal protein L34 OS=Nicotiana tabacum GN=RPL34 PE=2 SV=1//2.135e-62
Cla010335	809.333	509.573	0.66745	0.0068756	0.026961	up	sp|Q9LU10|DEGP8_ARATH Protease Do-like 8, chloroplastic OS=Arabidopsis thaliana GN=DEGP8 PE=1 SV=1//0
Cla010336	1783.9	1071.19	0.73582	0.0013438	0.0067573	up	sp|Q8LC68|NRP2_ARATH NAP1-related protein 2 OS=Arabidopsis thaliana GN=NRP2 PE=1 SV=2//1.41636e-78
Cla010341	1267.08	461.239	1.4579	9.3705e-10	1.9094e-08	up	sp|Q00466|HAT7_ARATH Homeobox-leucine zipper protein HAT7 OS=Arabidopsis thaliana GN=HAT7 PE=2 SV=4//1.92028e-82
Cla010352	14991.2	5238.97	1.5168	7.5005e-06	7.0108e-05	up	sp|Q9ZVX4|U90A1_ARATH UDP-glycosyltransferase 90A1 OS=Arabidopsis thaliana GN=UGT90A1 PE=2 SV=1//1.3178e-48
Cla010353	15683.6	5240.04	1.5816	7.9289e-06	7.3766e-05	up	sp|Q9ZVX4|U90A1_ARATH UDP-glycosyltransferase 90A1 OS=Arabidopsis thaliana GN=UGT90A1 PE=2 SV=1//2.56967e-40
Cla010358	484.907	251.878	0.94498	0.0007429	0.0040186	up	sp|O34331|YLBH_BACSU Putative rRNA methyltransferase YlbH OS=Bacillus subtilis (strain 168) GN=ylbH PE=3 SV=2//4.1874e-12
Cla010376	2566.28	1098.73	1.2238	2.277e-05	0.00019065	up	sp|Q8IUH2|CREG2_HUMAN Protein CREG2 OS=Homo sapiens GN=CREG2 PE=1 SV=1//8.54468e-32
Cla010377	4028.08	1916.39	1.0717	4.9974e-07	6.0613e-06	up	sp|O49856|FTRC_SOYBN Ferredoxin-thioredoxin reductase catalytic chain, chloroplastic OS=Glycine max GN=FTRC PE=2 SV=1//1.28071e-77
Cla010388	3999.59	917.389	2.1242	1.5442e-21	1.226e-19	up	sp|Q94JU2|WTR18_ARATH WAT1-related protein At3g28050 OS=Arabidopsis thaliana GN=At3g28050 PE=2 SV=1//5.00531e-64
Cla010389	39.4079	7.73162	2.3496	0.0063978	0.025342	up	sp|O48788|Y2267_ARATH Probable inactive receptor kinase At2g26730 OS=Arabidopsis thaliana GN=At2g26730 PE=1 SV=1//1.51333e-74
Cla010395	1082.65	665.462	0.70213	0.0034648	0.015159	up	sp|Q9LTR2|TGD2_ARATH Protein TRIGALACTOSYLDIACYLGLYCEROL 2, chloroplastic OS=Arabidopsis thaliana GN=TGD2 PE=2 SV=1//1.72252e-59
Cla010401	597.278	208.017	1.5217	5.0957e-08	7.6409e-07	up	sp|Q9LII9|GDL54_ARATH GDSL esterase/lipase At3g27950 OS=Arabidopsis thaliana GN=At3g27950 PE=2 SV=1//3.35123e-131
Cla010405	4068.89	1661.68	1.292	2.451e-09	4.5691e-08	up	sp|O22609|DEGP1_ARATH Protease Do-like 1, chloroplastic OS=Arabidopsis thaliana GN=DEGP1 PE=1 SV=2//0
Cla010408	1266.99	450.493	1.4918	7.2177e-10	1.489e-08	up	sp|Q500U8|TKPR1_ARATH Tetraketide alpha-pyrone reductase 1 OS=Arabidopsis thaliana GN=TKPR1 PE=1 SV=1//1.30031e-33
Cla010411	90.5671	39.4022	1.2007	0.013553	0.046743	up	sp|P36210|RK121_ARATH 50S ribosomal protein L12-1, chloroplastic OS=Arabidopsis thaliana GN=RPL12A PE=2 SV=1//2.77702e-60
Cla010417	6453.15	2709.15	1.2522	3.0967e-09	5.6618e-08	up	sp|Q9ZR41|GLRX_SOLLC Glutaredoxin OS=Solanum lycopersicum PE=3 SV=1//2.50643e-55
Cla010421	2533.24	1439.66	0.81525	0.0038807	0.01666	up	sp|Q75VW3|DNAJ_HYDTT Chaperone protein DnaJ OS=Hydrogenobacter thermophilus (strain DSM 6534 / IAM 12695 / TK-6) GN=dnaJ PE=3 SV=1//1.38087e-12
Cla010423	3659.85	1666.81	1.1347	9.2902e-08	1.3121e-06	up	-//-
Cla010434	2351.52	665.854	1.8203	1.3896e-15	6.0861e-14	up	sp|P73627|Y1770_SYNY3 Uncharacterized protein sll1770 OS=Synechocystis sp. (strain PCC 6803 / Kazusa) GN=sll1770 PE=3 SV=1//3.56443e-69
Cla010448	471.083	11.2548	5.3874	7.4405e-13	2.3915e-11	up	sp|Q339N5|CSLH1_ORYSJ Cellulose synthase-like protein H1 OS=Oryza sativa subsp. japonica GN=CSLH1 PE=2 SV=2//3.58197e-143
Cla010457	1744.66	631.883	1.4652	2.6155e-10	5.6963e-09	up	sp|Q9SA96|AROD1_ARATH Arogenate dehydratase/prephenate dehydratase 1, chloroplastic OS=Arabidopsis thaliana GN=ADT1 PE=1 SV=1//7.20122e-148
Cla010458	674.391	296.64	1.1849	4.7055e-06	4.6306e-05	up	sp|O80885|ARASP_ARATH Membrane metalloprotease ARASP, chloroplastic OS=Arabidopsis thaliana GN=ARASP PE=2 SV=1//1.77909e-170
Cla010471	537.263	271.189	0.98633	0.0002428	0.0015302	up	-//-
Cla010475	806.326	48.2425	4.063	1.4153e-39	3.6159e-37	up	-//-
Cla010476	27.3976	0.304475	6.4916	2.9133e-05	0.00023842	up	sp|O49595|HMGB1_ARATH High mobility group B protein 1 OS=Arabidopsis thaliana GN=HMGB1 PE=1 SV=1//3.1994e-17
Cla010509	785.385	370.773	1.0829	1.6434e-05	0.00014226	up	-//-
Cla010510	822.283	405.534	1.0198	3.6307e-05	0.00029104	up	sp|O23373|FH3_ARATH Formin-like protein 3 OS=Arabidopsis thaliana GN=FH3 PE=2 SV=3//3.52295e-177
Cla010538	890.744	534.112	0.73787	0.0026764	0.012236	up	sp|Q9P2Y5|UVRAG_HUMAN UV radiation resistance-associated gene protein OS=Homo sapiens GN=UVRAG PE=1 SV=1//1.48975e-13
Cla010566	617.909	206.574	1.5807	0.001283	0.0065025	up	sp|O04933|SPSA2_CRAPL Probable sucrose-phosphate synthase 2 OS=Craterostigma plantagineum GN=SPS2 PE=2 SV=1//0
Cla010595	316.54	166.421	0.92755	0.0032145	0.01428	up	sp|Q9SX33|ALA9_ARATH Putative phospholipid-transporting ATPase 9 OS=Arabidopsis thaliana GN=ALA9 PE=3 SV=1//4.06592e-165
Cla010601	405.824	125.748	1.6903	0.00030887	0.0018749	up	sp|Q8VYP9|ICML1_ARATH Probable isoprenylcysteine alpha-carbonyl methylesterase ICMEL1 OS=Arabidopsis thaliana GN=ICMEL1 PE=2 SV=1//1.98402e-161
Cla010611	2051.42	971.709	1.078	2.0017e-06	2.1621e-05	up	sp|O80585|MTHR2_ARATH Methylenetetrahydrofolate reductase 2 OS=Arabidopsis thaliana GN=MTHFR2 PE=1 SV=2//0
Cla010640	1285.85	636.383	1.0148	1.3053e-05	0.0001151	up	-//-
Cla010643	4981.55	2372.46	1.0702	0.00036334	0.0021588	up	sp|Q5N800|NYC1_ORYSJ Probable chlorophyll(ide) b reductase NYC1, chloroplastic OS=Oryza sativa subsp. japonica GN=NYC1 PE=1 SV=1//0
Cla010650	1724.1	732.186	1.2356	5.3517e-08	7.9832e-07	up	sp|Q8H0W1|PLSP1_ARATH Chloroplast processing peptidase OS=Arabidopsis thaliana GN=PLSP1 PE=2 SV=2//1.04931e-119
Cla010656	280.67	146.825	0.93478	0.003774	0.016272	up	-//-
Cla010657	1299.88	516.121	1.3326	3.0189e-08	4.6837e-07	up	sp|Q66GI4|PRRP1_ARATH Proteinaceous RNase P 1, chloroplastic/mitochondrial OS=Arabidopsis thaliana GN=PRORP1 PE=1 SV=1//2.75893e-09
Cla010678	3047.63	1695.83	0.8457	9.8199e-05	0.00069517	up	sp|C0LGT1|Y5129_ARATH Probable LRR receptor-like serine/threonine-protein kinase At5g10290 OS=Arabidopsis thaliana GN=At5g10290 PE=2 SV=1//0
Cla010685	117.871	55.6185	1.0836	0.01061	0.038265	up	-//-
Cla010687	30726.6	5723.53	2.4245	3.7942e-30	5.685e-28	up	-//-
Cla010694	2217.95	1141.52	0.95827	1.6009e-05	0.00013877	up	sp|Q9M876|SYYM_ARATH Tyrosine--tRNA ligase, chloroplastic/mitochondrial OS=Arabidopsis thaliana GN=EMB2768 PE=2 SV=1//0
Cla010698	6244.04	2772.53	1.1713	2.5991e-08	4.0815e-07	up	sp|Q9SEC2|MSRA_LACSA Peptide methionine sulfoxide reductase OS=Lactuca sativa PE=2 SV=1//1.58154e-123
Cla010709	132.737	9.41815	3.817	2.7581e-12	8.1668e-11	up	sp|O65718|CNGC2_ARATH Cyclic nucleotide-gated ion channel 2 OS=Arabidopsis thaliana GN=CNGC2 PE=1 SV=1//0
Cla010722	1328.92	574.474	1.2099	2.5803e-06	2.7147e-05	up	sp|A2WW87|GAM1_ORYSI Transcription factor GAMYB OS=Oryza sativa subsp. indica GN=GAM1 PE=2 SV=1//5.93722e-37
Cla010723	4379.94	2512.53	0.80177	0.00016715	0.0011068	up	sp|Q3E875|RGAPX_ARATH Uncharacterized Rho GTPase-activating protein At5g61530 OS=Arabidopsis thaliana GN=At5g61530 PE=1 SV=2//2.74731e-170
Cla010733	266.042	144.99	0.8757	0.0061334	0.024465	up	sp|Q8VYT5|FB254_ARATH F-box protein At5g07670 OS=Arabidopsis thaliana GN=At5g07670 PE=2 SV=1//6.31652e-176
Cla010754	2524.49	1366.01	0.88602	5.1712e-05	0.00039681	up	sp|Q0QLE4|DML_EUBBA 2,3-dimethylmalate lyase OS=Eubacterium barkeri GN=Dml PE=1 SV=1//1.4757e-64
Cla010756	663.127	397.728	0.7375	0.0042251	0.017876	up	sp|Q0WMN5|Y3913_ARATH Uncharacterized protein At3g49140 OS=Arabidopsis thaliana GN=At3g49140 PE=1 SV=2//7.17525e-28
Cla010777	282.322	162.08	0.80064	0.014558	0.049542	up	sp|O05235|YUGF_BACSU Uncharacterized hydrolase YugF OS=Bacillus subtilis (strain 168) GN=yugF PE=3 SV=1//6.62307e-13
Cla010783	6199.32	386.775	4.0025	2.8165e-63	2.2451e-60	up	sp|Q8L9Y0|SCP25_ARATH Serine carboxypeptidase-like 25 OS=Arabidopsis thaliana GN=SCPL25 PE=2 SV=2//1.28744e-21
Cla010795	249.712	46.6889	2.4191	1.1825e-10	2.7528e-09	up	sp|Q8S8A0|GDU4_ARATH Protein GLUTAMINE DUMPER 4 OS=Arabidopsis thaliana GN=GDU4 PE=2 SV=1//6.423e-14
Cla010819	1145.48	495.569	1.2088	5.7248e-07	6.8642e-06	up	sp|Q94KT8|COBRA_ARATH Protein COBRA OS=Arabidopsis thaliana GN=COB PE=2 SV=1//0
Cla010830	1536.6	740.218	1.0537	5.8997e-06	5.6606e-05	up	sp|Q9DCQ3|GOT1A_MOUSE Vesicle transport protein GOT1A OS=Mus musculus GN=Golt1a PE=2 SV=1//2.40488e-17
Cla010836	2790.14	1658.76	0.75023	0.00065053	0.0035792	up	sp|Q9Y7K5|YGI3_SCHPO Uncharacterized WD repeat-containing protein C2A9.03 OS=Schizosaccharomyces pombe (strain 972 / ATCC 24843) GN=SPBC2A9.03 PE=3 SV=2//8.63154e-35
Cla010839	2889.01	994.287	1.5388	3.6656e-12	1.0695e-10	up	sp|Q9SAC0|ZCIS_ARATH 15-cis-zeta-carotene isomerase, chloroplastic OS=Arabidopsis thaliana GN=Z-ISO PE=1 SV=1//8.49758e-171
Cla010844	929.395	380.439	1.2886	0.0041621	0.01764	up	sp|Q9LX29|ACR4L_ARATH Serine/threonine-protein kinase-like protein ACR4 OS=Arabidopsis thaliana GN=ACR4 PE=1 SV=1//0
Cla010851	567.817	308.726	0.8791	0.0010071	0.005262	up	sp|Q9SIC4|NTH1_ARATH Endonuclease III homolog 1, chloroplastic OS=Arabidopsis thaliana GN=NTH1 PE=2 SV=2//2.96074e-25
Cla010852	2966.77	2009.17	0.56229	0.009143	0.033892	up	sp|Q55DL2|MET18_DICDI Histidine protein methyltransferase 1 homolog OS=Dictyostelium discoideum GN=DDB_G0270580 PE=3 SV=1//4.45394e-13
Cla010854	304.012	82.6608	1.8789	2.0469e-07	2.6992e-06	up	sp|Q7XT99|AKR2_ORYSJ Probable aldo-keto reductase 2 OS=Oryza sativa subsp. japonica GN=Os04g0338000 PE=2 SV=2//1.02334e-179
Cla010859	230.391	92.5699	1.3155	0.00020343	0.0013115	up	sp|P29344|RR1_SPIOL 30S ribosomal protein S1, chloroplastic OS=Spinacia oleracea GN=RPS1 PE=1 SV=1//7.64126e-17
Cla010862	6874.67	4108.9	0.74254	0.0003299	0.0019838	up	sp|Q6ZY51|PWD_ARATH Phosphoglucan, water dikinase, chloroplastic OS=Arabidopsis thaliana GN=GWD3 PE=1 SV=1//0
Cla010864	7036.35	4240.56	0.73057	0.00040249	0.0023625	up	sp|Q93ZN2|ALKR4_ARATH Probable aldo-keto reductase 4 OS=Arabidopsis thaliana GN=At1g60710 PE=2 SV=1//0
Cla010865	1742.12	564.757	1.6251	2.1192e-06	2.2754e-05	up	-//-
Cla010872	1297.42	435.673	1.5743	6.4074e-11	1.5783e-09	up	-//-
Cla010873	4465.85	3010.28	0.56904	0.0070235	0.027433	up	sp|Q8LJW3|ACR4_ARATH ACT domain-containing protein ACR4 OS=Arabidopsis thaliana GN=ACR4 PE=2 SV=1//2.8698e-155
Cla010875	518.73	169.082	1.6173	6.9068e-08	9.9883e-07	up	sp|O65373|BAG5_ARATH BAG family molecular chaperone regulator 5, mitochondrial OS=Arabidopsis thaliana GN=BAG5 PE=1 SV=1//3.12828e-17
Cla010880	294.044	130.351	1.1736	0.00093209	0.0049113	up	sp|Q680A6|GDPD3_ARATH Glycerophosphodiester phosphodiesterase GDPD3 OS=Arabidopsis thaliana GN=GDPD3 PE=2 SV=1//1.08925e-125
Cla010882	5700.06	3471.14	0.71557	0.00056956	0.0031972	up	sp|O22800|COL14_ARATH Zinc finger protein CONSTANS-LIKE 14 OS=Arabidopsis thaliana GN=COL14 PE=2 SV=2//8.2907e-23
Cla010883	318.205	92.8009	1.7777	6.3485e-08	9.2956e-07	up	sp|Q9SIQ7|CDPKO_ARATH Calcium-dependent protein kinase 24 OS=Arabidopsis thaliana GN=CPK24 PE=2 SV=1//0
Cla010890	2798.99	1511.85	0.88859	3.9426e-05	0.00031365	up	sp|Q9LT67|BH113_ARATH Transcription factor bHLH113 OS=Arabidopsis thaliana GN=BHLH113 PE=2 SV=1//1.64342e-18
Cla010898	16949.1	5074.8	1.7398	8.0157e-16	3.6222e-14	up	sp|P80093|PDS_CAPAN 15-cis-phytoene desaturase, chloroplastic/chromoplastic OS=Capsicum annuum GN=PDS PE=1 SV=1//0
Cla010899	394.719	141.876	1.4762	1.6482e-06	1.8127e-05	up	sp|Q03943|IM30_PEA Membrane-associated 30 kDa protein, chloroplastic OS=Pisum sativum GN=IM30 PE=2 SV=1//1.24828e-17
Cla010900	1554.84	647.55	1.2637	4.9422e-08	7.4387e-07	up	sp|Q03943|IM30_PEA Membrane-associated 30 kDa protein, chloroplastic OS=Pisum sativum GN=IM30 PE=2 SV=1//3.15157e-112
Cla010907	2619.14	925.537	1.5007	2.0324e-11	5.3153e-10	up	sp|Q9LYV6|GEML5_ARATH GEM-like protein 5 OS=Arabidopsis thaliana GN=At5g13200 PE=1 SV=1//9.51433e-122
Cla010910	3022.85	1633.88	0.8876	4.8924e-05	0.00037789	up	sp|Q9T0A0|LACS4_ARATH Long chain acyl-CoA synthetase 4 OS=Arabidopsis thaliana GN=LACS4 PE=2 SV=1//0
Cla010916	16799	10671.1	0.65467	0.0013289	0.0067025	up	-//-
Cla010940	102.427	1.00054	6.6777	3.0554e-06	3.1581e-05	up	sp|Q9ZT29|SC5D_TOBAC Delta(7)-sterol-C5(6)-desaturase OS=Nicotiana tabacum PE=2 SV=1//4.22716e-136
Cla010961	2374.2	1154.19	1.0406	2.1496e-06	2.3044e-05	up	sp|O23403|PPD1_ARATH PsbP domain-containing protein 1, chloroplastic OS=Arabidopsis thaliana GN=PPD1 PE=1 SV=1//7.53774e-96
Cla010997	6429.32	3772.71	0.76907	0.00025302	0.0015841	up	sp|Q9FIK7|THIC2_ARATH Probable acetyl-CoA acetyltransferase, cytosolic 2 OS=Arabidopsis thaliana GN=At5g47720 PE=2 SV=1//0
Cla010998	6994.59	4146.2	0.75445	0.0002105	0.001351	up	sp|Q41014|FENR2_PEA Ferredoxin--NADP reductase, root isozyme, chloroplastic OS=Pisum sativum PE=2 SV=2//0
Cla011016	8158.26	3438.86	1.2463	3.0209e-09	5.5485e-08	up	sp|P92963|RAB1C_ARATH Ras-related protein RABB1c OS=Arabidopsis thaliana GN=RABB1C PE=1 SV=1//1.57699e-142
Cla011065	6005.5	3984.04	0.59205	0.0037595	0.01622	up	sp|Q94F62|BAK1_ARATH BRASSINOSTEROID INSENSITIVE 1-associated receptor kinase 1 OS=Arabidopsis thaliana GN=BAK1 PE=1 SV=2//1.01672e-66
Cla011076	1252.79	755.015	0.73056	0.0013833	0.0069299	up	sp|P44505|AKH_HAEIN Bifunctional aspartokinase/homoserine dehydrogenase OS=Haemophilus influenzae (strain ATCC 51907 / DSM 11121 / KW20 / Rd) GN=thrA PE=3 SV=1//1.99159e-38
Cla011083	7550.87	3992.85	0.91922	0.0015924	0.0078202	up	sp|Q9LES3|AI5L2_ARATH ABSCISIC ACID-INSENSITIVE 5-like protein 2 OS=Arabidopsis thaliana GN=DPBF3 PE=1 SV=1//6.80414e-39
Cla011084	664.704	346.075	0.94163	0.00025553	0.0015988	up	-//-
Cla011088	1926.81	684.011	1.4941	7.0686e-11	1.7263e-09	up	sp|P93841|ISPE_SOLLC 4-diphosphocytidyl-2-C-methyl-D-erythritol kinase, chloroplastic/chromoplastic (Fragment) OS=Solanum lycopersicum GN=ISPE PE=1 SV=1//3.51556e-172
Cla011094	3539.51	2431.03	0.54198	0.01019	0.036976	up	sp|Q39054|CNX1_ARATH Molybdopterin biosynthesis protein CNX1 OS=Arabidopsis thaliana GN=CNX1 PE=1 SV=2//0
Cla011095	6055.94	4189.09	0.53171	0.010511	0.037954	up	sp|Q42699|METE_CATRO 5-methyltetrahydropteroyltriglutamate--homocysteine methyltransferase OS=Catharanthus roseus GN=METE PE=2 SV=1//0
Cla011098	1855.94	487.123	1.9298	2.49e-16	1.1986e-14	up	sp|Q8W496|PTC52_ARATH Protochlorophyllide-dependent translocon component 52, chloroplastic OS=Arabidopsis thaliana GN=PTC52 PE=2 SV=1//0
Cla011106	1804.33	342.236	2.3984	8.3335e-09	1.4279e-07	up	-//-
Cla011111	51.5747	12.6159	2.0314	0.0032304	0.014334	up	sp|Q8VZG8|Y4885_ARATH Probable LRR receptor-like serine/threonine-protein kinase At4g08850 OS=Arabidopsis thaliana GN=At4g08850 PE=2 SV=3//6.7064e-81
Cla011112	539.907	151.161	1.8366	4.0439e-10	8.6004e-09	up	sp|Q9LVC3|PUM12_ARATH Pumilio homolog 12 OS=Arabidopsis thaliana GN=APUM12 PE=2 SV=2//3.43802e-141
Cla011114	12169.7	5299.55	1.1994	1.0326e-08	1.738e-07	up	sp|P08927|RUBB_PEA RuBisCO large subunit-binding protein subunit beta, chloroplastic OS=Pisum sativum PE=1 SV=2//0
Cla011120	2051.95	1107.98	0.88906	7.1874e-05	0.00053049	up	-//-
Cla011129	7322.97	4692.5	0.64207	0.0027429	0.012496	up	sp|Q9SZA3|EIF3K_ARATH Eukaryotic translation initiation factor 3 subunit K OS=Arabidopsis thaliana GN=TIF3K1 PE=2 SV=1//1.88376e-113
Cla011138	12898.1	3920.59	1.718	6.7945e-16	3.0984e-14	up	sp|O65282|CH10C_ARATH 20 kDa chaperonin, chloroplastic OS=Arabidopsis thaliana GN=CPN21 PE=1 SV=2//3.63025e-132
Cla011140	19788.6	12678.2	0.64232	0.0020244	0.0096313	up	-//-
Cla011144	3679.54	1586.02	1.2141	2.1379e-08	3.4139e-07	up	sp|A7PZL3|PGLR_VITVI Probable polygalacturonase OS=Vitis vinifera GN=GSVIVT00026920001 PE=1 SV=1//2.90927e-128
Cla011146	1435.79	855.857	0.74641	0.0012361	0.0062986	up	sp|Q5RJV0|COQ9_XENTR Ubiquinone biosynthesis protein COQ9, mitochondrial OS=Xenopus tropicalis GN=coq9 PE=2 SV=1//1.29559e-44
Cla011147	2597	1573.49	0.72288	0.00069061	0.0037654	up	-//-
Cla011149	19958.6	11690	0.77174	0.00014044	0.00095549	up	sp|A6X935|ITIH4_MOUSE Inter alpha-trypsin inhibitor, heavy chain 4 OS=Mus musculus GN=Itih4 PE=1 SV=2//6.2637e-20
Cla011169	137.087	61.6511	1.1529	0.0099496	0.036329	up	sp|Q8L8A6|GRF5_ARATH Growth-regulating factor 5 OS=Arabidopsis thaliana GN=GRF5 PE=1 SV=1//2.42792e-52
Cla011172	14.8454	0.696069	4.4146	0.010051	0.036611	up	sp|H2DH21|C7A29_PANGI Cytochrome P450 CYP72A219 OS=Panax ginseng PE=2 SV=1//7.07046e-179
Cla011177	4443.71	1915.34	1.2142	1.1262e-08	1.8811e-07	up	sp|Q9SKI2|VPS2A_ARATH Vacuolar protein sorting-associated protein 2 homolog 1 OS=Arabidopsis thaliana GN=VPS2.1 PE=1 SV=2//3.65757e-97
Cla011181	15301.9	6897.15	1.1496	3.6232e-06	3.6838e-05	up	sp|O94673|YG75_SCHPO Uncharacterized membrane protein C776.05 OS=Schizosaccharomyces pombe (strain 972 / ATCC 24843) GN=SPBC776.05 PE=4 SV=2//9.8661e-28
Cla011187	4694.25	2037.71	1.2039	1.4661e-08	2.4007e-07	up	sp|Q9S7U9|M2K2_ARATH Mitogen-activated protein kinase kinase 2 OS=Arabidopsis thaliana GN=MKK2 PE=1 SV=2//2.88458e-177
Cla011191	2727.42	1215.07	1.1665	9.4826e-08	1.3336e-06	up	-//-
Cla011205	911.62	36.614	4.638	8.4476e-46	3.2374e-43	up	sp|Q9LTS3|CKX3_ARATH Cytokinin dehydrogenase 3 OS=Arabidopsis thaliana GN=CKX3 PE=1 SV=1//6.90785e-152
Cla011216	662.898	353.589	0.90671	0.00045037	0.0026022	up	sp|Q94K18|Y4966_ARATH Uncharacterized protein At4g29660 OS=Arabidopsis thaliana GN=EMB2752 PE=4 SV=1//3.03804e-43
Cla011217	8533.89	5179.19	0.72048	0.0047924	0.019914	up	sp|O65896|CDA1_ARATH Cytidine deaminase 1 OS=Arabidopsis thaliana GN=CDA1 PE=1 SV=1//4.93466e-118
Cla011233	904.937	316.572	1.5153	1.9774e-09	3.7601e-08	up	-//-
Cla011241	9755.41	6659.26	0.55084	0.0074325	0.028713	up	sp|Q9SZE4|VP322_ARATH Vacuolar protein sorting-associated protein 32 homolog 2 OS=Arabidopsis thaliana GN=VPS32.2 PE=1 SV=1//5.06674e-75
Cla011245	818.063	469.955	0.79969	0.0015877	0.0078033	up	sp|O82201|AP4S_ARATH AP-4 complex subunit sigma OS=Arabidopsis thaliana GN=At2g19790 PE=1 SV=1//1.16762e-97
Cla011246	1793.94	708.852	1.3396	4.8007e-09	8.5571e-08	up	sp|Q94AA4|PFKA3_ARATH ATP-dependent 6-phosphofructokinase 3 OS=Arabidopsis thaliana GN=PFK3 PE=1 SV=1//0
Cla011250	2617.42	932.996	1.4882	2.19e-11	5.7124e-10	up	sp|Q8VZU9|DERL1_ARATH Derlin-1 OS=Arabidopsis thaliana GN=DER1 PE=2 SV=1//9.56745e-81
Cla011259	5285.71	3182.2	0.73207	0.00047262	0.0027174	up	sp|Q9SEK3|HXK1_SPIOL Hexokinase-1 OS=Spinacia oleracea GN=HXK1 PE=2 SV=1//0
Cla011277	562.114	171.886	1.7094	1.7518e-06	1.9139e-05	up	sp|Q43317|CYSK_CITLA Cysteine synthase OS=Citrullus lanatus PE=1 SV=1//3.48102e-120
Cla011284	138.432	6.68846	4.3714	8.3484e-11	2.0057e-09	up	sp|H2DH21|C7A29_PANGI Cytochrome P450 CYP72A219 OS=Panax ginseng PE=2 SV=1//4.66803e-124
Cla011287	492.525	282.712	0.80086	0.0036011	0.015652	up	-//-
Cla011293	5419.41	1240.01	2.1278	3.0576e-22	2.5928e-20	up	sp|Q9XH46|TATA_PEA Sec-independent protein translocase protein TATA, chloroplastic OS=Pisum sativum GN=TATA PE=1 SV=1//6.30133e-40
Cla011299	17671.6	11326.1	0.64178	0.0069168	0.027086	up	sp|Q07796|SODC_IPOBA Superoxide dismutase [Cu-Zn] OS=Ipomoea batatas GN=SODCC PE=2 SV=2//3.12632e-95
Cla011304	1538.32	1021.12	0.59121	0.0085265	0.032102	up	sp|Q86SZ2|TPC6B_HUMAN Trafficking protein particle complex subunit 6B OS=Homo sapiens GN=TRAPPC6B PE=1 SV=1//9.6852e-39
Cla011336	2310.92	1139.18	1.0205	3.6434e-06	3.7025e-05	up	-//-
Cla011338	5770.09	443.227	3.7025	6.1997e-06	5.917e-05	up	sp|O82485|OPT7_ARATH Oligopeptide transporter 7 OS=Arabidopsis thaliana GN=OPT7 PE=2 SV=1//0
Cla011339	1341.78	115.367	3.5398	9.2696e-07	1.0709e-05	up	sp|O82485|OPT7_ARATH Oligopeptide transporter 7 OS=Arabidopsis thaliana GN=OPT7 PE=2 SV=1//1.00139e-80
Cla011342	706.593	410.146	0.78474	0.0022879	0.010708	up	sp|Q8RX01|Y3567_ARATH BTB/POZ domain-containing protein At3g05675 OS=Arabidopsis thaliana GN=At3g05675 PE=2 SV=1//2.3243e-64
Cla011347	273.477	88.7291	1.6239	3.0024e-06	3.113e-05	up	-//-
Cla011348	5587.38	3388.34	0.72159	0.00048755	0.0027927	up	-//-
Cla011351	1696.03	764.921	1.1488	2.9729e-06	3.0872e-05	up	sp|Q680C0|GDL62_ARATH GDSL esterase/lipase At4g10955 OS=Arabidopsis thaliana GN=At4g10955 PE=2 SV=1//5.80765e-153
Cla011355	3724.94	191.413	4.2825	1.0285e-14	3.9953e-13	up	sp|Q9FLE8|Y5986_ARATH Uncharacterized protein At5g39865 OS=Arabidopsis thaliana GN=At5g39865 PE=2 SV=1//1.39084e-23
Cla011356	10153.2	2327.04	2.1254	1.9622e-21	1.5395e-19	up	sp|P37707|B2_DAUCA B2 protein OS=Daucus carota PE=2 SV=1//7.89129e-94
Cla011357	4427.3	1237.92	1.8385	5.4685e-17	2.8232e-15	up	sp|Q9XED8|ARFI_ARATH Auxin response factor 9 OS=Arabidopsis thaliana GN=ARF9 PE=1 SV=1//0
Cla011361	976.576	459.228	1.0885	0.00046225	0.0026624	up	sp|Q6K4V2|SWET4_ORYSJ Bidirectional sugar transporter SWEET4 OS=Oryza sativa subsp. japonica GN=SWEET4 PE=2 SV=1//9.9347e-91
Cla011382	1701.26	525.954	1.6936	2.9537e-08	4.6021e-07	up	sp|Q8L4X4|GAT2_ARATH Probable GABA transporter 2 OS=Arabidopsis thaliana GN=At5g41800 PE=1 SV=1//8.46722e-176
Cla011390	53286	36768.1	0.5353	0.0057962	0.023316	up	sp|P35135|UBC4_SOLLC Ubiquitin-conjugating enzyme E2-17 kDa OS=Solanum lycopersicum PE=2 SV=1//5.5079e-103
Cla011394	32942.9	11895.9	1.4695	1.0278e-12	3.2204e-11	up	sp|Q9SZ67|WRK19_ARATH Probable WRKY transcription factor 19 OS=Arabidopsis thaliana GN=WRKY19 PE=2 SV=1//4.67593e-47
Cla011396	6970.27	4344.3	0.68209	0.0010279	0.0053579	up	sp|Q9SUT9|RTNLB_ARATH Reticulon-like protein B2 OS=Arabidopsis thaliana GN=RTNLB2 PE=1 SV=1//2.71476e-112
Cla011413	1048.99	256.376	2.0327	2.7641e-05	0.00022762	up	-//-
Cla011414	10526	2485.12	2.0826	1.2914e-11	3.4731e-10	up	-//-
Cla011415	39.3227	4.07842	3.2693	0.00031156	0.0018871	up	-//-
Cla011420	4208.67	204.651	4.3621	1.0995e-34	2.1482e-32	up	sp|Q9SZZ8|BCH1_ARATH Beta-carotene 3-hydroxylase 1, chloroplastic OS=Arabidopsis thaliana GN=BETA-OHASE 1 PE=1 SV=1//2.60437e-116
Cla011421	725.141	461.071	0.65327	0.0087913	0.032833	up	-//-
Cla011440	6892.93	4613.49	0.57926	0.0046847	0.019522	up	-//-
Cla011456	2896.16	1971.27	0.55501	0.0088976	0.033155	up	sp|Q8LBU2|GPX8_ARATH Probable glutathione peroxidase 8 OS=Arabidopsis thaliana GN=GPX8 PE=2 SV=1//5.43212e-63
Cla011457	18371.4	6117.58	1.5864	7.041e-08	1.0153e-06	up	sp|O48646|GPX6_ARATH Probable phospholipid hydroperoxide glutathione peroxidase 6, mitochondrial OS=Arabidopsis thaliana GN=GPX6 PE=2 SV=2//5.71977e-103
Cla011458	7327.11	4467.26	0.71385	0.0074765	0.028824	up	sp|Q9SH30|HMA5_ARATH Probable copper-transporting ATPase HMA5 OS=Arabidopsis thaliana GN=HMA5 PE=1 SV=2//0
Cla011466	148.224	25.4702	2.5409	9.7713e-06	8.8753e-05	up	sp|Q9SH27|LOR4_ARATH Protein LURP-one-related 4 OS=Arabidopsis thaliana GN=At1g63410 PE=3 SV=1//3.34718e-39
Cla011480	6585.01	1738.61	1.9213	2.4673e-07	3.1989e-06	up	sp|Q9CAN1|RBL2_ARATH RHOMBOID-like protein 2 OS=Arabidopsis thaliana GN=RBL2 PE=1 SV=1//4.19409e-124
Cla011481	287.232	99.8244	1.5248	4.685e-06	4.6128e-05	up	-//-
Cla011482	602.66	275.649	1.1285	0.0001362	0.00093207	up	sp|F4JP36|HAP2_ARATH Protein HAPLESS 2 OS=Arabidopsis thaliana GN=HAP2 PE=2 SV=1//0
Cla011491	475.32	186.903	1.3466	2.5045e-06	2.6408e-05	up	sp|Q29Q28|UTR2_ARATH UDP-galactose/UDP-glucose transporter 2 OS=Arabidopsis thaliana GN=UTR2 PE=2 SV=1//3.49729e-16
Cla011496	249.724	81.0507	1.6234	0.00064045	0.0035325	up	sp|Q8LGM7|MOCOS_SOLLC Molybdenum cofactor sulfurase OS=Solanum lycopersicum GN=FLACCA PE=2 SV=1//2.82434e-11
Cla011497	1707.99	604.803	1.4978	1.086e-10	2.5581e-09	up	sp|Q9LQ04|RMLCD_ARATH Bifunctional dTDP-4-dehydrorhamnose 3,5-epimerase/dTDP-4-dehydrorhamnose reductase OS=Arabidopsis thaliana GN=NRS/ER PE=1 SV=1//3.60188e-180
Cla011499	144.091	40.7844	1.8209	0.00087431	0.0046574	up	-//-
Cla011500	2178.48	1399.31	0.63861	0.0036319	0.015765	up	sp|Q76LS9|FA63A_MOUSE Protein FAM63A OS=Mus musculus GN=Fam63a PE=1 SV=1//2.02876e-18
Cla011503	3464.96	1015.57	1.7705	7.5717e-12	2.1074e-10	up	sp|A7VLV1|SGRW_PEA Protein STAY-GREEN, chloroplastic OS=Pisum sativum GN=SGR PE=2 SV=1//2.34744e-102
Cla011522	842.462	448.7	0.90886	0.00028316	0.0017437	up	sp|Q9LQ10|1A110_ARATH Probable aminotransferase ACS10 OS=Arabidopsis thaliana GN=ACS10 PE=1 SV=1//0
Cla011524	8180.32	5543.93	0.56125	0.0076828	0.029488	up	sp|Q6NNI8|SAP1_ARATH Zinc finger A20 and AN1 domain-containing stress-associated protein 1 OS=Arabidopsis thaliana GN=SAP1 PE=1 SV=1//3.70793e-56
Cla011531	715.151	459.204	0.63911	0.012435	0.043574	up	-//-
Cla011533	5232.26	1977.57	1.4037	4.7846e-11	1.1933e-09	up	sp|Q9XJ36|CLPR2_ARATH ATP-dependent Clp protease proteolytic subunit-related protein 2, chloroplastic OS=Arabidopsis thaliana GN=CLPR2 PE=1 SV=1//2.338e-143
Cla011536	157.608	3.13187	5.6532	2.5555e-20	1.7806e-18	up	sp|Q9LXU9|IRKI_ARATH IRK-interacting protein OS=Arabidopsis thaliana GN=IRKI PE=1 SV=1//2.84702e-71
Cla011542	42009.8	4297.85	3.289	2.2828e-50	1.2637e-47	up	sp|Q8H1H9|AMO_ARATH Primary amine oxidase OS=Arabidopsis thaliana GN=At1g62810 PE=2 SV=1//0
Cla011547	190.792	0.946057	7.6559	5.374e-29	7.2853e-27	up	sp|D1MI46|C76BA_SWEMU Geraniol 8-hydroxylase OS=Swertia mussotii GN=CYP76B10 PE=1 SV=1//1.68072e-29
Cla011549	1654.76	435.177	1.927	4.9413e-16	2.3041e-14	up	-//-
Cla011551	6488.78	1452.82	2.1591	0.00072959	0.003952	up	sp|P17407|21KD_DAUCA 21 kDa protein OS=Daucus carota PE=2 SV=1//1.19058e-39
Cla011552	1780.21	1222.12	0.54266	0.012937	0.045023	up	sp|I1K0K6|EFGC2_SOYBN Elongation factor G-2, chloroplastic OS=Glycine max GN=fusA2 PE=3 SV=1//0
Cla011553	3043.37	1215.8	1.3238	1.1581e-09	2.2987e-08	up	sp|P49042|VPE_RICCO Vacuolar-processing enzyme OS=Ricinus communis PE=1 SV=1//0
Cla011555	2336.33	348.826	2.7437	2.1342e-30	3.222e-28	up	sp|Q8H1Q1|TL225_ARATH Thylakoid lumenal protein At1g12250, chloroplastic OS=Arabidopsis thaliana GN=At1g12250 PE=1 SV=1//1.89973e-108
Cla011561	3159.05	1212.83	1.3811	3.4739e-10	7.4438e-09	up	sp|P49245|FABH2_CUPWR 3-oxoacyl-[acyl-carrier-protein] synthase 3 B, chloroplastic OS=Cuphea wrightii GN=KAS3B PE=2 SV=1//0
Cla011570	17.351	1.22878	3.8197	0.011985	0.042308	up	sp|P14009|14KD_DAUCA 14 kDa proline-rich protein DC2.15 OS=Daucus carota PE=2 SV=1//1.26769e-24
Cla011573	8806.66	217.295	5.3409	4.7233e-27	5.4096e-25	up	sp|P14009|14KD_DAUCA 14 kDa proline-rich protein DC2.15 OS=Daucus carota PE=2 SV=1//1.91912e-25
Cla011574	159413	20595.5	2.9524	1.0543e-18	6.3666e-17	up	sp|Q9S7I2|AIR1_ARATH Putative lipid-binding protein AIR1 OS=Arabidopsis thaliana GN=AIR1 PE=2 SV=1//6.31944e-22
Cla011575	25.0996	0	Inf	1.7023e-05	0.00014686	up	sp|Q39176|ERLI1_ARATH Lipid transfer protein EARLI 1 OS=Arabidopsis thaliana GN=EARLI1 PE=1 SV=1//7.00876e-17
Cla011578	5602.08	2904.29	0.94777	5.7847e-06	5.5635e-05	up	sp|Q8VYK7|ATG8F_ARATH Autophagy-related protein 8f OS=Arabidopsis thaliana GN=ATG8F PE=2 SV=1//3.16084e-75
Cla011584	856.779	563.596	0.60426	0.013816	0.047504	up	sp|Q944R7|ANM16_ARATH Protein arginine N-methyltransferase 1.6 OS=Arabidopsis thaliana GN=PRMT16 PE=2 SV=2//2.09121e-66
Cla011585	2075.42	1332.45	0.63933	0.003585	0.015592	up	sp|Q8LPF3|PME68_ARATH Probable pectinesterase 68 OS=Arabidopsis thaliana GN=PME68 PE=2 SV=1//0
Cla011595	1172.02	781.571	0.58455	0.012424	0.043551	up	sp|Q84V22|PSD1_ARATH Phosphatidylserine decarboxylase proenzyme 1, mitochondrial OS=Arabidopsis thaliana GN=PSD1 PE=2 SV=1//0
Cla011596	963.639	523.09	0.88143	0.00029315	0.0017955	up	-//-
Cla011597	4247.69	1867.16	1.1858	3.6823e-08	5.6447e-07	up	sp|O34371|YTET_BACSU Putative oxidoreductase YteT OS=Bacillus subtilis (strain 168) GN=yteT PE=2 SV=1//4.44357e-10
Cla011608	5074.37	2642.17	0.94151	9.4175e-06	8.5931e-05	up	sp|Q5UNY4|YL728_MIMIV Uncharacterized protein L728 OS=Acanthamoeba polyphaga mimivirus GN=MIMI_L728 PE=4 SV=1//1.57749e-58
Cla011624	89.5214	12.3866	2.8535	1.81e-06	1.9711e-05	up	sp|Q39163|TGA5_ARATH Transcription factor TGA5 OS=Arabidopsis thaliana GN=TGA5 PE=1 SV=2//2.49523e-15
Cla011643	780.89	415.95	0.90871	0.00025823	0.0016128	up	sp|Q8GXR9|DHNA_ARATH Alternative NAD(P)H-ubiquinone oxidoreductase C1, chloroplastic/mitochondrial OS=Arabidopsis thaliana GN=NDC1 PE=1 SV=2//9.47065e-179
Cla011654	15.4337	0.315352	5.613	0.010683	0.038471	up	-//-
Cla011668	32.4594	2.13132	3.9288	0.00036746	0.0021801	up	sp|Q01417|PM1_SOYBN 18 kDa seed maturation protein OS=Glycine max GN=GMPM1 PE=2 SV=1//2.37548e-24
Cla011678	840.775	367.697	1.1932	3.0286e-06	3.1369e-05	up	sp|Q8RXW0|RBL14_ARATH Rhomboid-like protein 14, mitochondrial OS=Arabidopsis thaliana GN=RBL14 PE=2 SV=1//1.39668e-106
Cla011687	4220.86	2906.87	0.53807	0.010638	0.038336	up	sp|P57681|PCYOX_ARATH Farnesylcysteine lyase OS=Arabidopsis thaliana GN=FLCY PE=1 SV=1//0
Cla011726	1413.32	929.511	0.60454	0.010366	0.037496	up	sp|Q8GYA4|CRK10_ARATH Cysteine-rich receptor-like protein kinase 10 OS=Arabidopsis thaliana GN=CRK10 PE=1 SV=3//3.24129e-100
Cla011745	93.0568	35.5059	1.3901	0.007423	0.028684	up	-//-
Cla011747	7539.24	4344.16	0.79534	0.00011779	0.00081706	up	-//-
Cla011749	2580.61	863.643	1.5792	2.5887e-12	7.6996e-11	up	sp|Q2QY07|CCDA2_ORYSJ Cytochrome c-type biogenesis ccda-like chloroplastic protein 2 OS=Oryza sativa subsp. japonica GN=CCDA2 PE=3 SV=1//1.29786e-129
Cla011754	1591.23	807.797	0.97808	1.7451e-05	0.00015016	up	-//-
Cla011759	22212.3	15170.7	0.55007	0.007031	0.027457	up	sp|Q754F0|SYM1_ASHGO Protein SYM1 OS=Ashbya gossypii (strain ATCC 10895 / CBS 109.51 / FGSC 9923 / NRRL Y-1056) GN=SYM1 PE=3 SV=1//7.17309e-12
Cla011760	25475.2	4064.56	2.6479	1.0408e-34	2.0535e-32	up	sp|Q9LD44|NAC56_ARATH NAC transcription factor 56 OS=Arabidopsis thaliana GN=NAC056 PE=2 SV=1//3.38833e-106
Cla011786	7683.78	2154.38	1.8345	1.5204e-17	8.2111e-16	up	sp|Q9SEU6|TRXM4_ARATH Thioredoxin M4, chloroplastic OS=Arabidopsis thaliana GN=At3g15360 PE=2 SV=2//1.87894e-57
Cla011809	195.145	85.3473	1.1931	0.0045231	0.018944	up	-//-
Cla011821	6165.24	4267.7	0.5307	0.011438	0.04074	up	-//-
Cla011833	494.388	232.238	1.09	0.0001139	0.00079308	up	-//-
Cla011870	1414.32	801.59	0.81917	0.00032367	0.0019504	up	sp|P0C5E2|Y1839_ARATH Probable serine/threonine-protein kinase At1g18390 OS=Arabidopsis thaliana GN=At1g18390 PE=2 SV=2//2.17408e-158
Cla011887	110.907	2.4358	5.5088	5.8116e-15	2.3163e-13	up	-//-
Cla011904	2148.87	1281.31	0.74596	0.0014564	0.0072341	up	-//-
Cla011910	150.045	54.8665	1.4514	0.00044523	0.0025777	up	-//-
Cla011918	1645.12	712.02	1.2082	1.2674e-07	1.7387e-06	up	-//-
Cla011936	1220.4	608.513	1.004	2.1464e-05	0.00018101	up	sp|Q00874|DR100_ARATH DNA-damage-repair/toleration protein DRT100 OS=Arabidopsis thaliana GN=DRT100 PE=2 SV=2//8.50003e-33
Cla011951	296.268	25.5992	3.5327	0.006298	0.025021	up	sp|Q91XE8|TM205_MOUSE Transmembrane protein 205 OS=Mus musculus GN=Tmem205 PE=2 SV=1//4.63166e-06
Cla011965	859.938	313.891	1.454	6.4897e-09	1.1335e-07	up	-//-
Cla011966	525.89	249.708	1.0745	9.5318e-05	0.00067742	up	-//-
Cla011985	543.521	265.861	1.0317	0.00011751	0.00081565	up	-//-
Cla011990	2219.7	1248.42	0.83026	0.00015537	0.0010397	up	sp|Q3AQ69|Y1601_CHLCH UPF0301 protein Cag_1601 OS=Chlorobium chlorochromatii (strain CaD3) GN=Cag_1601 PE=3 SV=1//4.28221e-22
Cla011996	702.25	431.567	0.7024	0.0050503	0.020781	up	sp|P55195|PUR6_VIGAC Phosphoribosylaminoimidazole carboxylase, chloroplastic (Fragment) OS=Vigna aconitifolia GN=PURKE PE=2 SV=1//5.36919e-59
Cla011998	19230.1	8275.46	1.2165	5.1011e-09	9.0521e-08	up	sp|Q9SFH9|HEM21_ARATH Delta-aminolevulinic acid dehydratase 1, chloroplastic OS=Arabidopsis thaliana GN=HEMB1 PE=2 SV=1//0
Cla012000	1648.17	379.352	2.1193	3.0083e-18	1.7128e-16	up	sp|Q0JQF7|DRE2A_ORYSJ Dehydration-responsive element-binding protein 2A OS=Oryza sativa subsp. japonica GN=DREB2A PE=2 SV=1//7.65001e-42
Cla012003	3031.52	1735.6	0.80461	0.00018635	0.0012176	up	sp|P91850|MIFH_BRUMA Macrophage migration inhibitory factor homolog OS=Brugia malayi GN=Bm1_28435 PE=3 SV=4//8.55923e-19
Cla012008	476.863	211.3	1.1743	0.00025203	0.0015794	up	-//-
Cla012011	9512.79	5147.54	0.88599	1.5347e-05	0.00013338	up	sp|Q5XPJ9|SCAR2_ARATH Protein SCAR2 OS=Arabidopsis thaliana GN=SCAR2 PE=1 SV=1//1.07368e-27
Cla012034	1417.02	930.332	0.60704	0.0091685	0.03398	up	sp|Q9ZVH7|FAX3_ARATH Protein FATTY ACID EXPORT 3, chloroplastic OS=Arabidopsis thaliana GN=FAX3 PE=2 SV=2//6.70612e-62
Cla012036	452.676	69.2116	2.7094	3.2107e-17	1.7062e-15	up	-//-
Cla012037	1601.09	1080.39	0.5675	0.011387	0.040573	up	-//-
Cla012046	3022.08	1796.18	0.75061	0.00040646	0.0023824	up	sp|Q7X9V3|NSI_ARATH Acetyltransferase NSI OS=Arabidopsis thaliana GN=NSI PE=1 SV=1//5.39214e-94
Cla012047	2915.37	1891.99	0.62377	0.0032384	0.014357	up	sp|C0LGD7|Y1684_ARATH Probable LRR receptor-like serine/threonine-protein kinase At1g06840 OS=Arabidopsis thaliana GN=At1g06840 PE=2 SV=2//0
Cla012052	4032.36	2376.54	0.76276	0.000283	0.0017437	up	sp|Q9C9Z5|NDUA1_ARATH NADH dehydrogenase [ubiquinone] 1 alpha subcomplex subunit 1 OS=Arabidopsis thaliana GN=At3g08610 PE=3 SV=1//2.10252e-30
Cla012055	98.5119	19.8491	2.3112	1.0789e-05	9.6938e-05	up	-//-
Cla012059	403.09	201.138	1.0029	0.00055037	0.0031054	up	sp|Q6DST1|Y1465_ARATH Late embryogenesis abundant protein At1g64065 OS=Arabidopsis thaliana GN=At1g64065 PE=2 SV=1//8.41451e-07
Cla012065	2151.09	1400.03	0.61961	0.0044305	0.018619	up	sp|Q8DJB3|GRPE_THEEB Protein GrpE OS=Thermosynechococcus elongatus (strain BP-1) GN=grpE PE=3 SV=1//8.87643e-44
Cla012071	983.973	330.17	1.5754	4.2499e-10	8.9826e-09	up	sp|P27684|PSRP5_SPIOL 50S ribosomal protein 5 alpha, chloroplastic OS=Spinacia oleracea GN=PSRP5 PE=1 SV=1//1.57757e-07
Cla012081	18326.6	6681.22	1.4558	0.0006791	0.0037097	up	sp|Q69Q02|DPE2_ORYSJ 4-alpha-glucanotransferase DPE2 OS=Oryza sativa subsp. japonica GN=DPE2 PE=2 SV=1//0
Cla012117	3034.4	1394.7	1.1215	2.4808e-07	3.2103e-06	up	sp|Q9SE95|FIP2_ARATH FH protein interacting protein FIP2 OS=Arabidopsis thaliana GN=FIP2 PE=1 SV=1//1.23518e-76
Cla012121	4106.49	1905.76	1.1075	3.2968e-06	3.3882e-05	up	sp|B8XCH5|QKY_ARATH Protein QUIRKY OS=Arabidopsis thaliana GN=QKY PE=2 SV=1//3.80002e-40
Cla012123	751.719	56.2692	3.7398	4.6108e-09	8.2334e-08	up	sp|Q6J9S1|RA211_ARATH Ethylene-responsive transcription factor RAP2-11 OS=Arabidopsis thaliana GN=RAP2-11 PE=2 SV=1//1.20815e-06
Cla012124	339.234	33.2756	3.3497	5.8309e-19	3.6312e-17	up	sp|P11890|HS23C_OXYRB Small heat shock protein, chloroplastic OS=Oxybasis rubra GN=HSP23 PE=2 SV=1//4.72909e-48
Cla012129	4683.54	1654.13	1.5015	3.3086e-12	9.7103e-11	up	-//-
Cla012134	1319.83	373.287	1.822	5.1101e-14	1.8448e-12	up	sp|Q9C503|NDF5_ARATH Protein NDH-DEPENDENT CYCLIC ELECTRON FLOW 5 OS=Arabidopsis thaliana GN=NDF5 PE=2 SV=1//3.4294e-78
Cla012141	6088.51	3419.02	0.83251	6.0933e-05	0.00045856	up	sp|Q9ATM2|SIP12_MAIZE Aquaporin SIP1-2 OS=Zea mays GN=SIP1-2 PE=2 SV=1//9.8791e-79
Cla012143	82798.8	51761.7	0.67772	0.00074354	0.004021	up	-//-
Cla012154	8525.67	4128.59	1.0462	4.3557e-07	5.3482e-06	up	sp|Q42908|PMGI_MESCR 2,3-bisphosphoglycerate-independent phosphoglycerate mutase OS=Mesembryanthemum crystallinum GN=PGM1 PE=2 SV=1//0
Cla012155	80.0174	5.72064	3.8061	2.556e-08	4.0202e-07	up	sp|P81392|MYB06_ANTMA Myb-related protein 306 OS=Antirrhinum majus GN=MYB306 PE=2 SV=1//1.3427e-19
Cla012157	7990.48	2204.35	1.8579	2.9329e-18	1.6747e-16	up	sp|Q9ZNT1|NB5R1_ARATH NADH--cytochrome b5 reductase 1 OS=Arabidopsis thaliana GN=CBR1 PE=1 SV=1//8.46668e-153
Cla012158	3556.02	1975.93	0.84773	6.2221e-05	0.00046667	up	sp|A7SMW7|L2HDH_NEMVE L-2-hydroxyglutarate dehydrogenase, mitochondrial OS=Nematostella vectensis GN=v1g172254 PE=3 SV=1//9.49468e-38
Cla012168	4829.36	1915.73	1.3339	4.7775e-10	1.0053e-08	up	sp|O24362|PSA3_SPIOL Proteasome subunit alpha type-3 OS=Spinacia oleracea GN=PAG1 PE=2 SV=1//1.05717e-160
Cla012169	5980.22	2225.73	1.4259	6.6032e-12	1.856e-10	up	sp|Q6SJV8|CRD1_GOSHI Magnesium-protoporphyrin IX monomethyl ester [oxidative] cyclase, chloroplastic OS=Gossypium hirsutum GN=CRD1 PE=2 SV=2//0
Cla012175	17121.3	8008.33	1.0962	0.00024528	0.0015444	up	sp|P48491|TPIS_ARATH Triosephosphate isomerase, cytosolic OS=Arabidopsis thaliana GN=CTIMC PE=1 SV=2//2.59194e-156
Cla012184	25909.6	17547.4	0.56223	0.0060853	0.024297	up	sp|P21616|AVP_VIGRR Pyrophosphate-energized vacuolar membrane proton pump OS=Vigna radiata var. radiata PE=1 SV=4//0
Cla012199	336.671	105.668	1.6718	1.3767e-07	1.8803e-06	up	sp|Q93ZH9|HHP1_ARATH Heptahelical transmembrane protein 1 OS=Arabidopsis thaliana GN=HHP1 PE=1 SV=1//1.54743e-131
Cla012200	83.9018	2.44667	5.0998	3.7402e-11	9.5192e-10	up	sp|Q3E9A4|GLYT5_ARATH Probable glycosyltransferase At5g20260 OS=Arabidopsis thaliana GN=At5g20260 PE=3 SV=3//2.69607e-175
Cla012212	914.363	507.217	0.85016	0.00042364	0.0024714	up	sp|Q9LFP7|Y5158_ARATH Probable receptor-like protein kinase At5g15080 OS=Arabidopsis thaliana GN=At5g15080 PE=2 SV=1//7.40607e-173
Cla012214	106974	37879.2	1.4978	4.8667e-11	1.2123e-09	up	sp|Q93WC4|IAA29_ARATH Auxin-responsive protein IAA29 OS=Arabidopsis thaliana GN=IAA29 PE=2 SV=2//5.73169e-11
Cla012217	1526.16	523.009	1.545	3.9672e-11	1.0007e-09	up	sp|Q8S9J8|CAP1_ARATH Probable clathrin assembly protein At4g32285 OS=Arabidopsis thaliana GN=At4g32285 PE=1 SV=2//2.50667e-166
Cla012229	1181.51	599.451	0.97892	9.2642e-05	0.00066147	up	-//-
Cla012240	14.0294	0.685192	4.3558	0.01402	0.048056	up	sp|O80822|PER25_ARATH Peroxidase 25 OS=Arabidopsis thaliana GN=PER25 PE=2 SV=2//1.53254e-145
Cla012245	1570.85	735.245	1.0952	1.9975e-06	2.1587e-05	up	sp|O48782|HMOX1_ARATH Heme oxygenase 1, chloroplastic OS=Arabidopsis thaliana GN=HO1 PE=1 SV=2//1.82678e-141
Cla012258	506.151	208.834	1.2772	6.5191e-06	6.1922e-05	up	-//-
Cla012262	476.221	292.838	0.70153	0.010787	0.038782	up	sp|Q6AT25|C3H34_ORYSJ Zinc finger CCCH domain-containing protein 34 OS=Oryza sativa subsp. japonica GN=Os05g0176400 PE=2 SV=1//7.50327e-38
Cla012275	2570.98	740.804	1.7952	3.2084e-15	1.3348e-13	up	-//-
Cla012278	3041.41	2050.08	0.56906	0.0079238	0.030284	up	sp|Q8H156|RAN3_ARATH GTP-binding nuclear protein Ran-3 OS=Arabidopsis thaliana GN=RAN3 PE=1 SV=2//7.22983e-151
Cla012284	3159.27	2060.65	0.61649	0.0039673	0.016962	up	sp|Q9C5U3|PRS8A_ARATH 26S protease regulatory subunit 8 homolog A OS=Arabidopsis thaliana GN=RPT6A PE=1 SV=1//0
Cla012302	7214.59	4554.17	0.66373	0.001526	0.0075315	up	sp|Q9LQT8|GAI_ARATH DELLA protein GAI OS=Arabidopsis thaliana GN=GAI PE=1 SV=1//5.18332e-132
Cla012314	549.881	273.828	1.0058	0.00020806	0.001338	up	sp|Q0P4L9|TMM19_XENTR Transmembrane protein 19 OS=Xenopus tropicalis GN=tmem19 PE=2 SV=1//3.53829e-35
Cla012325	231.456	128.829	0.84529	0.011671	0.041445	up	sp|Q8VXZ0|NUD20_ARATH Nudix hydrolase 20, chloroplastic OS=Arabidopsis thaliana GN=NUDT20 PE=2 SV=1//3.45355e-146
Cla012327	449.216	94.9162	2.2427	1.1355e-12	3.5411e-11	up	sp|Q0JJS8|HF101_ORYSJ Fe-S cluster assembly factor HCF101, chloroplastic OS=Oryza sativa subsp. japonica GN=HCF101 PE=3 SV=3//0
Cla012350	437245	209338	1.0626	1.3989e-07	1.9081e-06	up	sp|Q08655|ASR1_SOLLC Abscisic stress-ripening protein 1 OS=Solanum lycopersicum GN=ASR1 PE=2 SV=1//4.07873e-07
Cla012354	508.163	218.703	1.2163	1.2227e-05	0.00010848	up	sp|Q6QPJ6|PRXQ_POPJC Peroxiredoxin Q, chloroplastic OS=Populus jackii GN=PRXQ PE=1 SV=1//2.79502e-82
Cla012357	560.076	294.912	0.92534	0.00062844	0.0034759	up	sp|O05235|YUGF_BACSU Uncharacterized hydrolase YugF OS=Bacillus subtilis (strain 168) GN=yugF PE=3 SV=1//2.46526e-20
Cla012365	343.251	196.618	0.80387	0.0061001	0.024347	up	sp|Q89AC4|RF2_BUCBP Peptide chain release factor 2 OS=Buchnera aphidicola subsp. Baizongia pistaciae (strain Bp) GN=prfB PE=3 SV=2//1.44111e-12
Cla012367	639.013	232.666	1.4576	6.7456e-08	9.8193e-07	up	-//-
Cla012368	4100.32	1518.3	1.4333	7.3924e-06	6.9195e-05	up	sp|Q9XF89|CB5_ARATH Chlorophyll a-b binding protein CP26, chloroplastic OS=Arabidopsis thaliana GN=LHCB5 PE=1 SV=1//1.89081e-140
Cla012370	1045.84	676.345	0.62883	0.0078084	0.029907	up	-//-
Cla012385	699.225	448.668	0.64011	0.0117	0.041514	up	sp|Q8VYF7|WHY2_ARATH Single-stranded DNA-binding protein WHY2, mitochondrial OS=Arabidopsis thaliana GN=WHY2 PE=1 SV=1//2.55262e-46
Cla012415	5875.2	3764.65	0.64212	0.0015882	0.0078033	up	sp|O80763|NRX1_ARATH Probable nucleoredoxin 1 OS=Arabidopsis thaliana GN=At1g60420 PE=1 SV=1//9.62172e-19
Cla012434	551.438	198.742	1.4723	0.0099518	0.036329	up	sp|Q40392|TMVRN_NICGU TMV resistance protein N OS=Nicotiana glutinosa GN=N PE=1 SV=1//3.27284e-165
Cla012443	13959.9	2454.21	2.508	5.8874e-20	3.9637e-18	up	sp|Q9SA18|AKH1_ARATH Bifunctional aspartokinase/homoserine dehydrogenase 1, chloroplastic OS=Arabidopsis thaliana GN=AKHSDH1 PE=1 SV=1//0
Cla012444	23402.8	3211.78	2.8652	1.8558e-11	4.8919e-10	up	sp|P37142|AKH_DAUCA Bifunctional aspartokinase/homoserine dehydrogenase, chloroplastic (Fragment) OS=Daucus carota PE=1 SV=1//0
Cla012447	1068.95	340.836	1.649	2.4536e-11	6.375e-10	up	sp|Q55909|Y305_SYNY3 TVP38/TMEM64 family membrane protein slr0305 OS=Synechocystis sp. (strain PCC 6803 / Kazusa) GN=slr0305 PE=3 SV=1//5.42191e-24
Cla012454	16504.7	4084.43	2.0147	1.4633e-21	1.1665e-19	up	sp|Q69ZF3|GBA2_MOUSE Non-lysosomal glucosylceramidase OS=Mus musculus GN=Gba2 PE=1 SV=2//1.71077e-177
Cla012465	530.065	11.7777	5.492	6.7696e-16	3.0942e-14	up	sp|Q9C9I2|ERF21_ARATH Ethylene-responsive transcription factor ERF021 OS=Arabidopsis thaliana GN=ERF021 PE=2 SV=1//7.06052e-52
Cla012481	17164.2	193.904	6.4679	1.3466e-13	4.6668e-12	up	sp|Q6YM50|MAN5_SOLLC Mannan endo-1,4-beta-mannosidase 5 OS=Solanum lycopersicum GN=MAN5 PE=2 SV=1//3.70132e-178
Cla012489	1368.85	408.828	1.7434	7.6779e-13	2.452e-11	up	-//-
Cla012497	2397.69	1091.96	1.1347	2.0479e-07	2.6992e-06	up	-//-
Cla012514	10826.7	5157.92	1.0697	2.5755e-07	3.3219e-06	up	sp|Q38836|AGL11_ARATH Agamous-like MADS-box protein AGL11 OS=Arabidopsis thaliana GN=AGL11 PE=1 SV=1//4.5705e-42
Cla012516	1186.83	449.666	1.4002	7.8297e-09	1.3462e-07	up	sp|Q940H7|MES12_ARATH Putative methylesterase 12, chloroplastic OS=Arabidopsis thaliana GN=MES12 PE=2 SV=1//8.90746e-178
Cla012523	219.549	50.4924	2.1204	5.562e-08	8.2593e-07	up	sp|Q9SUE0|YMG12_ARATH YlmG homolog protein 1-2, chloroplastic OS=Arabidopsis thaliana GN=YLMG1-2 PE=2 SV=1//5.7038e-69
Cla012526	912.862	551.029	0.72827	0.0025274	0.011675	up	sp|Q9LK31|Y3272_ARATH Kelch repeat-containing protein At3g27220 OS=Arabidopsis thaliana GN=At3g27220 PE=2 SV=1//0
Cla012532	307.512	112.47	1.4511	9.408e-06	8.5883e-05	up	sp|Q9XG77|PSA6_TOBAC Proteasome subunit alpha type-6 OS=Nicotiana tabacum GN=PAA1 PE=2 SV=1//1.14291e-173
Cla012551	4395.94	1106.79	1.9898	1.4569e-19	9.4572e-18	up	-//-
Cla012553	3425.57	1901.27	0.84938	8.1857e-05	0.00059296	up	sp|Q9LDV4|ALAT2_ARATH Alanine aminotransferase 2, mitochondrial OS=Arabidopsis thaliana GN=ALAAT2 PE=2 SV=1//0
Cla012554	14230.4	1862.41	2.9337	1.1807e-39	3.1795e-37	up	sp|Q43111|PME3_PHAVU Pectinesterase 3 OS=Phaseolus vulgaris GN=MPE3 PE=2 SV=1//4.00205e-23
Cla012575	4809.18	3284.48	0.55012	0.0087916	0.032833	up	sp|Q9SYH1|RSH3C_ARATH Probable GTP diphosphokinase RSH3, chloroplastic OS=Arabidopsis thaliana GN=RSH3 PE=2 SV=1//0
Cla012596	3385.43	1737.49	0.96233	5.865e-06	5.6327e-05	up	sp|Q8RWN9|ODP22_ARATH Dihydrolipoyllysine-residue acetyltransferase component 2 of pyruvate dehydrogenase complex, mitochondrial OS=Arabidopsis thaliana GN=At3g13930 PE=2 SV=2//0
Cla012602	901.128	441.305	1.03	3.3483e-05	0.00027025	up	sp|F4I907|GLYR2_ARATH Glyoxylate/succinic semialdehyde reductase 2, chloroplastic OS=Arabidopsis thaliana GN=GLYR2 PE=1 SV=1//8.72414e-163
Cla012608	3979.76	2362.14	0.75259	0.0022554	0.010571	up	sp|Q9LRW7|IDD11_ARATH Protein indeterminate-domain 11 OS=Arabidopsis thaliana GN=IDD11 PE=2 SV=1//1.74249e-99
Cla012625	7114.24	4429.32	0.68362	0.0043579	0.01835	up	sp|Q9M0E2|RL282_ARATH 60S ribosomal protein L28-2 OS=Arabidopsis thaliana GN=RPL28C PE=2 SV=1//2.89925e-76
Cla012629	20.9254	2.13132	3.2954	0.011619	0.041297	up	sp|Q94B46|FBL74_ARATH F-box/LRR-repeat protein At4g14096 OS=Arabidopsis thaliana GN=At4g14096 PE=2 SV=1//1.05911e-12
Cla012630	924.801	560.223	0.72314	0.0032957	0.014566	up	sp|O04373|ILL4_ARATH IAA-amino acid hydrolase ILR1-like 4 OS=Arabidopsis thaliana GN=ILL4 PE=1 SV=2//0
Cla012631	418.016	206.598	1.0167	0.0004121	0.0024097	up	-//-
Cla012641	1408.33	892.763	0.65764	0.0040138	0.017106	up	sp|Q9KGG1|RADA_BACHD DNA repair protein RadA homolog OS=Bacillus halodurans (strain ATCC BAA-125 / DSM 18197 / FERM 7344 / JCM 9153 / C-125) GN=radA PE=3 SV=1//4.86887e-85
Cla012660	14889.1	2141.57	2.7975	2.0623e-10	4.5663e-09	up	-//-
Cla012663	106.847	0	Inf	7.2188e-20	4.8437e-18	up	sp|P87053|POF1_SCHPO F-box/WD repeat-containing protein pof1 OS=Schizosaccharomyces pombe (strain 972 / ATCC 24843) GN=pof1 PE=1 SV=1//2.95761e-10
Cla012665	3214.04	1579.67	1.0248	2.1057e-06	2.2645e-05	up	-//-
Cla012670	2262.86	806.065	1.4892	2.695e-05	0.00022248	up	sp|O04006|PSAH_BRACM Photosystem I reaction center subunit VI, chloroplastic OS=Brassica campestris GN=PSAH PE=2 SV=1//1.41784e-47
Cla012686	540.069	28.1651	4.2612	6.4871e-09	1.1335e-07	up	sp|P13088|AUX22_SOYBN Auxin-induced protein AUX22 OS=Glycine max GN=AUX22 PE=2 SV=1//2.23609e-52
Cla012691	3313.46	498.403	2.733	6.9247e-25	7.2249e-23	up	sp|Q9C942|CSE_ARATH Caffeoylshikimate esterase OS=Arabidopsis thaliana GN=CSE PE=1 SV=1//3.27327e-156
Cla012692	2644.69	1838.78	0.52435	0.014157	0.04845	up	sp|Q9SSB8|CX5B2_ARATH Cytochrome c oxidase subunit 5b-2, mitochondrial OS=Arabidopsis thaliana GN=COX5B-2 PE=2 SV=1//1.3289e-09
Cla012694	1852.1	1263.36	0.5519	0.012665	0.044193	up	sp|Q9SSB8|CX5B2_ARATH Cytochrome c oxidase subunit 5b-2, mitochondrial OS=Arabidopsis thaliana GN=COX5B-2 PE=2 SV=1//3.36139e-42
Cla012698	1510.02	998.618	0.59656	0.0075752	0.02916	up	sp|B5X8M4|BRCC3_SALSA Lys-63-specific deubiquitinase BRCC36 OS=Salmo salar GN=brcc3 PE=2 SV=1//1.43317e-06
Cla012703	935.443	457.815	1.0309	2.8651e-05	0.00023515	up	sp|Q9FV53|DEF1A_ARATH Peptide deformylase 1A, chloroplastic/mitochondrial OS=Arabidopsis thaliana GN=PDF1A PE=1 SV=3//1.94781e-123
Cla012706	590.762	268.783	1.1361	2.0327e-05	0.00017201	up	sp|Q9SSR6|PPR78_ARATH Pentatricopeptide repeat-containing protein At1g52640, mitochondrial OS=Arabidopsis thaliana GN=At1g52640 PE=2 SV=1//0
Cla012707	2704.07	1056.21	1.3562	7.0873e-10	1.4636e-08	up	sp|Q5RC30|SC11C_PONAB Signal peptidase complex catalytic subunit SEC11C OS=Pongo abelii GN=SEC11C PE=2 SV=3//8.01258e-65
Cla012708	1172.34	472.464	1.3111	1.4035e-07	1.9118e-06	up	sp|Q9SSR1|Y1259_ARATH DCC family protein At1g52590, chloroplastic OS=Arabidopsis thaliana GN=At1g52590 PE=2 SV=1//1.32076e-63
Cla012710	7434.6	657.722	3.4987	2.9366e-13	9.8518e-12	up	-//-
Cla012713	1726.44	21.4906	6.3279	4.43e-91	8.0256e-88	up	-//-
Cla012716	1745.3	326.6	2.4179	1.7756e-23	1.6306e-21	up	sp|Q8RWZ5|SD25_ARATH G-type lectin S-receptor-like serine/threonine-protein kinase SD2-5 OS=Arabidopsis thaliana GN=SD25 PE=1 SV=1//0
Cla012718	5331.49	2263.24	1.2361	0.002827	0.012821	up	sp|Q9LVZ8|LOR12_ARATH Protein LURP-one-related 12 OS=Arabidopsis thaliana GN=At3g15810 PE=2 SV=1//1.82333e-71
Cla012720	473.808	13.6366	5.1187	1.3316e-39	3.4915e-37	up	sp|Q949X0|ADS3_ARATH Palmitoyl-monogalactosyldiacylglycerol delta-7 desaturase, chloroplastic OS=Arabidopsis thaliana GN=ADS3 PE=2 SV=2//1.65878e-174
Cla012740	2900	1879.16	0.62597	0.0035273	0.015386	up	sp|Q99MB4|CBWD1_RAT COBW domain-containing protein 1 OS=Rattus norvegicus GN=Cbwd1 PE=2 SV=2//1.12957e-53
Cla012742	474.053	251.915	0.91211	0.00098742	0.0051674	up	sp|P42322|CANB1_NAEGR Calcineurin subunit B OS=Naegleria gruberi GN=CNB1 PE=3 SV=1//7.59519e-31
Cla012743	3248.31	1906.09	0.76907	0.00033692	0.0020216	up	sp|O22769|NDUV2_ARATH NADH dehydrogenase [ubiquinone] flavoprotein 2, mitochondrial OS=Arabidopsis thaliana GN=At4g02580 PE=2 SV=3//5.50365e-108
Cla012748	2287.33	1236.7	0.88717	6.1243e-05	0.00046055	up	sp|Q8DKR7|DNAJ_THEEB Chaperone protein DnaJ OS=Thermosynechococcus elongatus (strain BP-1) GN=dnaJ PE=3 SV=2//2.40475e-103
Cla012754	535.424	181.305	1.5623	2.1797e-08	3.4666e-07	up	sp|Q39262|ZFP3_ARATH Zinc finger protein 3 OS=Arabidopsis thaliana GN=ZFP3 PE=2 SV=1//2.45778e-40
Cla012759	528.358	329.24	0.68238	0.009804	0.035893	up	sp|O48962|EBP_ARATH Probable 3-beta-hydroxysteroid-Delta(8),Delta(7)-isomerase OS=Arabidopsis thaliana GN=At1g20050 PE=2 SV=1//1.91195e-81
Cla012765	122.719	17.3664	2.821	3.2518e-05	0.00026375	up	sp|Q9LYR6|PTR49_ARATH Protein NRT1/ PTR FAMILY 6.1 OS=Arabidopsis thaliana GN=NPF6.1 PE=2 SV=1//0
Cla012772	13064.1	7330.79	0.83357	5.7585e-05	0.00043683	up	sp|A9WT40|TAL_RENSM Transaldolase OS=Renibacterium salmoninarum (strain ATCC 33209 / DSM 20767 / JCM 11484 / NBRC 15589 / NCIMB 2235) GN=tal PE=3 SV=1//2.90378e-100
Cla012773	65.6233	22.8932	1.5193	0.0090227	0.033539	up	sp|Q9LYR5|FKB19_ARATH Peptidyl-prolyl cis-trans isomerase FKBP19, chloroplastic OS=Arabidopsis thaliana GN=FKBP19 PE=1 SV=1//3.27586e-90
Cla012775	379.292	224.247	0.75822	0.0096753	0.035534	up	-//-
Cla012805	6633.08	2976.66	1.156	3.2422e-06	3.3339e-05	up	sp|Q9T0A4|NDHS_ARATH NAD(P)H-quinone oxidoreductase subunit S, chloroplastic OS=Arabidopsis thaliana GN=ndhS PE=1 SV=1//1.00276e-73
Cla012808	1564.57	767.423	1.0277	5.626e-06	5.4399e-05	up	-//-
Cla012810	3183.2	1813.37	0.81181	0.00017633	0.0011593	up	sp|Q39828|SDL5A_SOYBN Dynamin-related protein 5A OS=Glycine max PE=2 SV=1//0
Cla012815	818.484	343.747	1.2516	7.6129e-07	8.9609e-06	up	-//-
Cla012818	9860.77	6182.93	0.67341	0.013004	0.045211	up	sp|P37707|B2_DAUCA B2 protein OS=Daucus carota PE=2 SV=1//9.99604e-91
Cla012840	1055.34	613.17	0.78335	0.001196	0.0061098	up	-//-
Cla012857	1023.27	676.405	0.59722	0.012619	0.044065	up	sp|F4KCL7|OE64M_ARATH Outer envelope protein 64, mitochondrial OS=Arabidopsis thaliana GN=OM64 PE=1 SV=1//0
Cla012872	2207.98	1221.58	0.85398	0.00010222	0.00072106	up	sp|Q8GYB8|OPR2_ARATH 12-oxophytodienoate reductase 2 OS=Arabidopsis thaliana GN=OPR2 PE=1 SV=2//0
Cla012881	738.497	300.549	1.297	5.4643e-07	6.5916e-06	up	sp|Q0WUA3|MENA_ARATH 1,4-dihydroxy-2-naphthoate polyprenyltransferase, chloroplastic OS=Arabidopsis thaliana GN=ABC4 PE=1 SV=2//1.289e-114
Cla012910	457.733	245.01	0.90167	0.0012422	0.0063228	up	sp|Q9M1J1|FIS1A_ARATH Mitochondrial fission 1 protein A OS=Arabidopsis thaliana GN=FIS1A PE=1 SV=1//4.65757e-63
Cla012911	831.556	405.026	1.0378	3.4525e-05	0.00027788	up	sp|Q67Z52|TBCB_ARATH Tubulin-folding cofactor B OS=Arabidopsis thaliana GN=TFCB PE=1 SV=1//9.82281e-130
Cla012919	6334.2	2772.42	1.192	2.0038e-08	3.2099e-07	up	sp|Q8H183|BUP1_ARATH Beta-ureidopropionase OS=Arabidopsis thaliana GN=PYD3 PE=1 SV=1//0
Cla012928	2204.42	1394.21	0.66095	0.010105	0.036754	up	sp|Q8S2T1|DDPS6_ARATH Dehydrodolichyl diphosphate synthase 6 OS=Arabidopsis thaliana GN=At2g17570 PE=2 SV=2//2.0132e-91
Cla012936	517.374	32.0292	4.0137	3.8601e-31	6.057e-29	up	sp|Q09686|YA14_SCHPO Putative glutamine amidotransferase-like protein C13C5.04 OS=Schizosaccharomyces pombe (strain 972 / ATCC 24843) GN=SPAC13C5.04 PE=3 SV=1//3.53552e-16
Cla012938	107.113	29.8306	1.8443	0.00022728	0.0014438	up	sp|Q9LXA5|LRK91_ARATH L-type lectin-domain containing receptor kinase IX.1 OS=Arabidopsis thaliana GN=LECRK91 PE=2 SV=1//6.50728e-164
Cla012942	4382.92	1131.62	1.9535	7.6634e-19	4.7135e-17	up	sp|Q9LXC9|IPYR6_ARATH Soluble inorganic pyrophosphatase 6, chloroplastic OS=Arabidopsis thaliana GN=PPA6 PE=1 SV=1//1.08664e-152
Cla012949	283.03	144.423	0.97065	0.0024156	0.011216	up	sp|Q9M0Z3|KEA3_ARATH K(+) efflux antiporter 3, chloroplastic OS=Arabidopsis thaliana GN=KEA3 PE=2 SV=2//0
Cla012950	2025.89	575.92	1.8146	5.4296e-15	2.1815e-13	up	sp|Q9C5C8|MSRB2_ARATH Peptide methionine sulfoxide reductase B2, chloroplastic OS=Arabidopsis thaliana GN=MSRB2 PE=1 SV=1//1.01436e-80
Cla012952	372.499	212.771	0.80794	0.0068686	0.026944	up	sp|Q9FGE9|TBL12_ARATH Protein trichome birefringence-like 12 OS=Arabidopsis thaliana GN=TBL12 PE=2 SV=1//0
Cla012956	1009.94	456.267	1.1463	6.4497e-06	6.1339e-05	up	-//-
Cla012958	1534.41	948.457	0.69403	0.0057774	0.02325	up	sp|Q9LXA7|GTE2_ARATH Transcription factor GTE2 OS=Arabidopsis thaliana GN=GTE2 PE=2 SV=2//1.33861e-34
Cla012964	117.745	1.44663	6.3468	5.1022e-18	2.8481e-16	up	sp|Q9LZB2|GDL74_ARATH GDSL esterase/lipase At5g03980 OS=Arabidopsis thaliana GN=At5g03980 PE=2 SV=1//7.49527e-94
Cla012984	2077.31	692.818	1.5842	1.4332e-10	3.2753e-09	up	sp|Q9SRQ1|C89A9_ARATH Cytochrome P450 89A9 OS=Arabidopsis thaliana GN=CYP89A9 PE=2 SV=1//0
Cla012985	1879.6	477.487	1.9769	2.6134e-17	1.4e-15	up	sp|Q42602|C89A2_ARATH Cytochrome P450 89A2 OS=Arabidopsis thaliana GN=CYP89A2 PE=2 SV=2//0
Cla013020	25448	2091.91	3.6047	6.1539e-15	2.4429e-13	up	sp|P16972|FER2_ARATH Ferredoxin-2, chloroplastic OS=Arabidopsis thaliana GN=FD2 PE=1 SV=1//5.32241e-62
Cla013024	2763.2	1052.25	1.3929	6.7114e-07	7.961e-06	up	-//-
Cla013036	103404	113.766	9.828	9.7972e-24	9.1662e-22	up	sp|P07730|GLUA2_ORYSJ Glutelin type-A 2 OS=Oryza sativa subsp. japonica GN=GLUA2 PE=1 SV=1//1.88043e-23
Cla013040	2604.56	1319.24	0.98133	5.9286e-06	5.6828e-05	up	-//-
Cla013041	855.187	538.926	0.66615	0.0060083	0.024043	up	sp|Q6IDL4|P24D3_ARATH Transmembrane emp24 domain-containing protein p24delta3 OS=Arabidopsis thaliana GN=At1g09580 PE=1 SV=1//1.26668e-100
Cla013045	2417.95	942.383	1.3594	1.3946e-09	2.7087e-08	up	sp|Q9NST1|PLPL3_HUMAN Patatin-like phospholipase domain-containing protein 3 OS=Homo sapiens GN=PNPLA3 PE=1 SV=2//3.82821e-19
Cla013046	63.776	5.85028	3.4464	4.6166e-06	4.552e-05	up	sp|Q8LG89|BABL_ARATH Basic blue protein OS=Arabidopsis thaliana GN=ARPN PE=2 SV=2//1.64312e-37
Cla013049	4008.5	2649.58	0.5973	0.004804	0.019949	up	sp|O64530|STR1_ARATH Thiosulfate/3-mercaptopyruvate sulfurtransferase 1, mitochondrial OS=Arabidopsis thaliana GN=STR1 PE=1 SV=1//0
Cla013053	12.6163	0	Inf	0.0043309	0.01825	up	sp|Q16998|LWA_ACTEQ LWamide neuropeptides (Fragment) OS=Actinia equina PE=2 SV=1//1.85619e-08
Cla013065	4106.92	2836.78	0.53381	0.011315	0.040368	up	sp|P40781|CYPR4_CYNCA Protein CYPRO4 OS=Cynara cardunculus GN=CYPRO4 PE=2 SV=1//0
Cla013086	4625.18	3220.86	0.52206	0.012175	0.042844	up	sp|O23193|CBSX1_ARATH CBS domain-containing protein CBSX1, chloroplastic OS=Arabidopsis thaliana GN=CBSX1 PE=1 SV=2//4.69262e-95
Cla013092	2989.49	1666.42	0.84315	8.6517e-05	0.00062332	up	sp|A5F120|NHAD_VIBC3 Na(+)/H(+) antiporter NhaD OS=Vibrio cholerae serotype O1 (strain ATCC 39541 / Classical Ogawa 395 / O395) GN=nhaD PE=1 SV=1//1.81928e-15
Cla013117	3917.47	2208.37	0.82694	8.3271e-05	0.00060212	up	sp|Q94EG6|Y5224_ARATH Uncharacterized protein At5g02240 OS=Arabidopsis thaliana GN=At5g02240 PE=1 SV=1//4.56798e-07
Cla013121	6172.14	633.052	3.2854	2.63e-46	1.0482e-43	up	sp|Q8L8W0|ALIS5_ARATH ALA-interacting subunit 5 OS=Arabidopsis thaliana GN=ALIS5 PE=1 SV=1//1.63694e-156
Cla013152	204.262	53.5174	1.9323	6.8771e-07	8.1382e-06	up	-//-
Cla013153	5619.78	2522.49	1.1557	4.2278e-08	6.4265e-07	up	sp|Q9SXJ6|CLPP3_ARATH ATP-dependent Clp protease proteolytic subunit 3, chloroplastic OS=Arabidopsis thaliana GN=CLPP3 PE=1 SV=1//1.28761e-148
Cla013158	1246.56	539.967	1.207	3.8127e-07	4.7369e-06	up	sp|Q84K34|SIL10_ARATH E3 ubiquitin-protein ligase SINA-like 10 OS=Arabidopsis thaliana GN=At5g37930 PE=2 SV=1//3.73346e-58
Cla013178	489.411	143.49	1.7701	1.2994e-09	2.5338e-08	up	sp|Q9C524|SCRK6_ARATH Probable fructokinase-6, chloroplastic OS=Arabidopsis thaliana GN=At1g66430 PE=2 SV=1//4.98343e-165
Cla013180	11.3547	0	Inf	0.011596	0.041235	up	sp|Q93VR4|ML423_ARATH MLP-like protein 423 OS=Arabidopsis thaliana GN=MLP423 PE=2 SV=1//1.7884e-18
Cla013188	283.243	91.3379	1.6328	2.2837e-06	2.4324e-05	up	sp|Q9C8Y1|CML23_ARATH Probable calcium-binding protein CML23 OS=Arabidopsis thaliana GN=CML23 PE=2 SV=1//2.14295e-48
Cla013193	410.976	246.055	0.74007	0.0085579	0.032196	up	sp|Q94AX2|PTST_ARATH Protein PTST, chloroplastic OS=Arabidopsis thaliana GN=PTST PE=1 SV=1//9.40711e-100
Cla013229	113.511	52.2779	1.1186	0.012064	0.042527	up	-//-
Cla013238	55.2217	11.3643	2.2807	0.0012966	0.0065628	up	sp|Q9LRQ8|PMAT2_ARATH Phenolic glucoside malonyltransferase 2 OS=Arabidopsis thaliana GN=PMAT2 PE=1 SV=1//1.59909e-81
Cla013240	2612.91	1366.29	0.93539	1.9471e-05	0.00016582	up	-//-
Cla013241	1397.98	472.394	1.5653	3.7842e-11	9.6066e-10	up	sp|P82412|RRP3_SPIOL 30S ribosomal protein 3, chloroplastic OS=Spinacia oleracea GN=PSRP3 PE=1 SV=1//1.21587e-62
Cla013250	1153.53	586.933	0.97479	3.2955e-05	0.00026664	up	sp|Q8N7N5|DCAF8_MOUSE DDB1- and CUL4-associated factor 8 OS=Mus musculus GN=Dcaf8 PE=1 SV=1//1.57392e-89
Cla013254	6811.98	3315.35	1.0389	4.117e-07	5.077e-06	up	sp|P48534|APX1_PEA L-ascorbate peroxidase, cytosolic OS=Pisum sativum GN=APX1 PE=1 SV=2//1.35933e-138
Cla013267	1629.14	1091.8	0.5774	0.0090865	0.033714	up	sp|Q52JK6|VIP2_NICBE Probable NOT transcription complex subunit VIP2 (Fragment) OS=Nicotiana benthamiana GN=VIP2 PE=1 SV=1//0
Cla013268	2245.29	980.771	1.1949	7.5784e-08	1.0865e-06	up	sp|Q9LX66|HERK_ARATH Receptor-like protein kinase HERK 1 OS=Arabidopsis thaliana GN=HERK1 PE=1 SV=1//0
Cla013278	119.701	38.4652	1.6378	0.00045916	0.0026461	up	sp|Q9LSW9|ATL16_ARATH RING-H2 finger protein ATL16 OS=Arabidopsis thaliana GN=ATL16 PE=2 SV=1//3.45774e-19
Cla013280	1160.8	251.547	2.2062	0.00024644	0.0015497	up	sp|Q9LX82|MYB48_ARATH Transcription factor MYB48 OS=Arabidopsis thaliana GN=MYB48 PE=2 SV=1//5.59496e-78
Cla013294	197.893	79.4441	1.3167	0.00039772	0.0023387	up	-//-
Cla013302	2241.84	1410.99	0.66797	0.0021043	0.0099581	up	sp|Q9LP45|PSD11_ARATH 26S proteasome non-ATPase regulatory subunit 11 homolog OS=Arabidopsis thaliana GN=RPN6 PE=1 SV=1//0
Cla013309	7072.63	3938.78	0.8445	0.011358	0.040482	up	sp|P48491|TPIS_ARATH Triosephosphate isomerase, cytosolic OS=Arabidopsis thaliana GN=CTIMC PE=1 SV=2//7.76894e-144
Cla013314	294.046	120.725	1.2843	7.9993e-05	0.00058158	up	sp|O48818|EXPA4_ARATH Expansin-A4 OS=Arabidopsis thaliana GN=EXPA4 PE=1 SV=1//8.42738e-165
Cla013324	793.383	319.781	1.3109	2.47e-07	3.1996e-06	up	sp|Q3AF07|DNAJ_CARHZ Chaperone protein DnaJ OS=Carboxydothermus hydrogenoformans (strain ATCC BAA-161 / DSM 6008 / Z-2901) GN=dnaJ PE=3 SV=1//3.75893e-18
Cla013328	6202.85	4129.25	0.58705	0.0046307	0.019346	up	sp|Q54G80|TF2AA_DICDI Transcription initiation factor IIA subunit 1 OS=Dictyostelium discoideum GN=gtf2a1 PE=3 SV=1//2.25638e-10
Cla013330	7840.01	3377.38	1.215	3.3701e-05	0.0002719	up	-//-
Cla013335	1020.76	607.696	0.74823	0.0015077	0.0074557	up	-//-
Cla013340	8543.17	2161.17	1.983	1.8414e-13	6.2834e-12	up	sp|P53537|PHSH_VICFA Alpha-glucan phosphorylase, H isozyme OS=Vicia faba PE=2 SV=1//0
Cla013341	3223.79	1756.8	0.87581	4.366e-05	0.00034234	up	sp|Q9FIL7|CRCK1_ARATH Calmodulin-binding receptor-like cytoplasmic kinase 1 OS=Arabidopsis thaliana GN=CRCK1 PE=1 SV=1//8.48576e-141
Cla013342	3581.11	1731.68	1.0482	1.268e-06	1.4243e-05	up	sp|Q5R833|ACO13_PONAB Acyl-coenzyme A thioesterase 13 OS=Pongo abelii GN=ACOT13 PE=2 SV=1//5.56481e-12
Cla013348	865.908	447.044	0.9538	0.00013407	0.00091906	up	-//-
Cla013357	26051.8	15213.4	0.77604	0.00010646	0.00074624	up	sp|Q8L7Y9|NPC1_ARATH Non-specific phospholipase C1 OS=Arabidopsis thaliana GN=NPC1 PE=2 SV=1//0
Cla013359	379.733	164.411	1.2077	6.1235e-05	0.00046055	up	sp|Q6NQ88|DDB2_ARATH Protein DAMAGED DNA-BINDING 2 OS=Arabidopsis thaliana GN=DDB2 PE=1 SV=1//0
Cla013362	9358.06	6610.82	0.50138	0.013321	0.046143	up	sp|Q9SP02|CP20A_ARATH Peptidyl-prolyl cis-trans isomerase CYP20-1 OS=Arabidopsis thaliana GN=CYP20-1 PE=1 SV=1//2.81786e-108
Cla013374	2738.04	885.102	1.6292	0.0028016	0.012729	up	sp|O64738|ZIP6_ARATH Zinc transporter 6, chloroplastic OS=Arabidopsis thaliana GN=ZIP6 PE=3 SV=1//3.04343e-158
Cla013384	737.728	387.117	0.93032	0.00044487	0.0025772	up	sp|Q2MHE4|HT1_ARATH Serine/threonine-protein kinase HT1 OS=Arabidopsis thaliana GN=HT1 PE=1 SV=1//1.19635e-34
Cla013403	931.885	556.721	0.7432	0.0019838	0.0094575	up	sp|Q8RWU5|FBL3_ARATH F-box/LRR-repeat protein 3 OS=Arabidopsis thaliana GN=FBL3 PE=2 SV=1//0
Cla013428	3392.13	1130.55	1.5852	3.788e-13	1.2477e-11	up	sp|Q9LVM2|NDHN_ARATH NAD(P)H-quinone oxidoreductase subunit N, chloroplastic OS=Arabidopsis thaliana GN=ndhN PE=2 SV=1//1.71622e-84
Cla013429	3248.99	1681.94	0.94986	8.5281e-06	7.8587e-05	up	sp|P51204|YCF54_PORPU Uncharacterized protein ycf54 OS=Porphyra purpurea GN=ycf54 PE=3 SV=1//7.40473e-15
Cla013430	858.978	364.555	1.2365	4.1658e-06	4.1487e-05	up	sp|Q8VYR0|MCU5_ARATH Calcium uniporter protein 5, mitochondrial OS=Arabidopsis thaliana GN=At1g57610 PE=2 SV=1//6.31499e-100
Cla013433	741.446	264.723	1.4859	1.7461e-08	2.8267e-07	up	sp|Q6NLC1|AB2D_ARATH ABC transporter D family member 2, chloroplastic OS=Arabidopsis thaliana GN=ABCC2 PE=1 SV=1//0
Cla013434	5153.06	918.3	2.4884	8.2355e-29	1.1089e-26	up	sp|O32107|YUID_BACSU Uncharacterized membrane protein YuiD OS=Bacillus subtilis (strain 168) GN=yuiD PE=4 SV=1//9.29308e-06
Cla013436	1863.07	1020.37	0.86858	8.8411e-05	0.00063536	up	sp|O64527|Y1926_ARATH UPF0678 fatty acid-binding protein-like protein At1g79260 OS=Arabidopsis thaliana GN=At1g79260 PE=1 SV=1//7.39171e-11
Cla013443	1882.58	1281.41	0.55498	0.013072	0.045399	up	sp|A2Y3Q5|HEMH_ORYSI Ferrochelatase-2, chloroplastic OS=Oryza sativa subsp. indica GN=HEMH PE=2 SV=2//2.40513e-24
Cla013454	2623.6	1419.81	0.88585	4.3459e-05	0.00034097	up	sp|Q5E924|G3PP2_ARATH Glyceraldehyde-3-phosphate dehydrogenase GAPCP2, chloroplastic OS=Arabidopsis thaliana GN=GAPCP2 PE=2 SV=1//0
Cla013455	6736.98	2591.86	1.3781	8.2913e-11	1.9955e-09	up	sp|Q42961|PGKH_TOBAC Phosphoglycerate kinase, chloroplastic OS=Nicotiana tabacum PE=2 SV=1//0
Cla013467	1382.73	888.466	0.63813	0.0053702	0.021849	up	sp|Q93W28|Y4554_ARATH Uncharacterized protein At4g15545 OS=Arabidopsis thaliana GN=At4g15545 PE=1 SV=1//9.72594e-59
Cla013473	2280.81	1503.34	0.60138	0.0069815	0.027306	up	sp|Q8LGM7|MOCOS_SOLLC Molybdenum cofactor sulfurase OS=Solanum lycopersicum GN=FLACCA PE=2 SV=1//5.26587e-84
Cla013483	1874.11	1141.25	0.7156	0.011783	0.041744	up	sp|P07369|CB2G_SOLLC Chlorophyll a-b binding protein 3C, chloroplastic OS=Solanum lycopersicum GN=CAB3C PE=3 SV=1//2.13732e-176
Cla013499	596.78	202.458	1.5596	1.0707e-08	1.7991e-07	up	sp|O49354|COQ3_ARATH Ubiquinone biosynthesis O-methyltransferase, mitochondrial OS=Arabidopsis thaliana GN=COQ3 PE=2 SV=2//1.63466e-131
Cla013512	4043.68	2832.18	0.51376	0.014437	0.049231	up	sp|O80340|ERF78_ARATH Ethylene-responsive transcription factor 4 OS=Arabidopsis thaliana GN=ERF4 PE=1 SV=1//1.56363e-25
Cla013515	1625.22	571.258	1.5084	0.0050219	0.020698	up	sp|Q9ZVN4|Y1500_ARATH Probable tyrosine-protein phosphatase At1g05000 OS=Arabidopsis thaliana GN=At1g05000 PE=1 SV=1//5.37643e-104
Cla013521	1865.31	1181.93	0.65827	0.003493	0.015265	up	sp|Q0WVE9|PLST1_ARATH Probable plastidic glucose transporter 1 OS=Arabidopsis thaliana GN=At1g05030 PE=2 SV=2//0
Cla013529	4627.76	2914.91	0.66686	0.0014037	0.0070123	up	-//-
Cla013542	1820.03	660.105	1.4632	2.5379e-10	5.5517e-09	up	-//-
Cla013543	2775.66	1196.06	1.2145	3.8189e-08	5.8451e-07	up	-//-
Cla013562	1135.79	464.992	1.2884	1.0908e-07	1.5153e-06	up	sp|Q9Y7P0|RISA_SCHPO Riboflavin synthase OS=Schizosaccharomyces pombe (strain 972 / ATCC 24843) GN=rib5 PE=1 SV=1//8.09598e-57
Cla013565	6291.73	2897.52	1.1186	1.1219e-07	1.5536e-06	up	sp|Q6R567|RMA1_CAPAN E3 ubiquitin-protein ligase RMA1H1 OS=Capsicum annuum GN=RMA1H1 PE=1 SV=1//1.23637e-54
Cla013566	4635.54	3090.2	0.58504	0.0052443	0.021442	up	-//-
Cla013585	1183.87	345.013	1.7788	3.2904e-13	1.0928e-11	up	sp|Q99XR4|GLFT_STRP1 Glutamate formimidoyltransferase OS=Streptococcus pyogenes serotype M1 GN=M5005_Spy1772 PE=1 SV=1//7.09782e-23
Cla013588	39.8494	2.57731	3.9506	0.013762	0.047365	up	-//-
Cla013597	2173.92	1436.61	0.59763	0.0066679	0.02624	up	sp|Q9C5E5|DGK5_ARATH Diacylglycerol kinase 5 OS=Arabidopsis thaliana GN=DGK5 PE=2 SV=1//0
Cla013598	114.589	49.7646	1.2033	0.0080544	0.030678	up	sp|Q9ZWB4|3AT1_ARATH Coumaroyl-CoA:anthocyanidin 3-O-glucoside-6&apos;&apos;-O-coumaroyltransferase 1 OS=Arabidopsis thaliana GN=3AT1 PE=1 SV=1//3.70339e-81
Cla013599	193.292	28.5247	2.7605	1.9627e-10	4.3798e-09	up	-//-
Cla013600	436.01	121.825	1.8396	1.5992e-09	3.0702e-08	up	sp|O65220|CPY28_ARATH Peptidyl-prolyl cis-trans isomerase CYP28, chloroplastic OS=Arabidopsis thaliana GN=CYP28 PE=1 SV=1//9.2068e-102
Cla013606	2558.54	1343.73	0.92908	2.4128e-05	0.00020135	up	sp|Q0WPT7|Y2104_ARATH Uncharacterized methyltransferase At2g41040, chloroplastic OS=Arabidopsis thaliana GN=At2g41040 PE=2 SV=1//1.18149e-151
Cla013624	2007.06	1178.6	0.76801	0.0147	0.04994	up	-//-
Cla013625	5129.96	2931.08	0.80752	0.0007657	0.0041296	up	sp|A1L4X7|AHL14_ARATH AT-hook motif nuclear-localized protein 14 OS=Arabidopsis thaliana GN=AHL14 PE=1 SV=1//2.17838e-53
Cla013629	588.769	122.236	2.268	1.1057e-13	3.8522e-12	up	sp|Q94A64|FB251_ARATH F-box protein At5g03970 OS=Arabidopsis thaliana GN=At5g03970 PE=2 SV=1//3.86974e-111
Cla013639	934.591	442.414	1.0789	1.3311e-05	0.00011711	up	-//-
Cla013652	3362.02	2181.45	0.62404	0.0027134	0.012388	up	sp|Q9XID3|Y1343_ARATH G-type lectin S-receptor-like serine/threonine-protein kinase At1g34300 OS=Arabidopsis thaliana GN=At1g34300 PE=2 SV=1//0
Cla013657	1433.91	850.033	0.75437	0.00097039	0.0050889	up	sp|Q9FIJ7|KAD2_ARATH Adenylate kinase 2, chloroplastic OS=Arabidopsis thaliana GN=At5g47840 PE=1 SV=1//8.95606e-106
Cla013668	729.788	307.02	1.2491	1.3147e-06	1.4744e-05	up	sp|A2WW87|GAM1_ORYSI Transcription factor GAMYB OS=Oryza sativa subsp. indica GN=GAM1 PE=2 SV=1//1.47975e-114
Cla013670	783.926	484.09	0.69544	0.0051579	0.021145	up	-//-
Cla013688	7205.73	4326.71	0.73587	0.00036587	0.0021713	up	-//-
Cla013691	2205.14	1463.53	0.59142	0.007497	0.028897	up	sp|Q9M376|VA727_ARATH Vesicle-associated membrane protein 727 OS=Arabidopsis thaliana GN=VAMP727 PE=2 SV=1//5.95106e-134
Cla013694	15648	3898.47	2.005	1.6257e-20	1.157e-18	up	sp|P27788|FER3_MAIZE Ferredoxin-3, chloroplastic OS=Zea mays GN=FDX3 PE=2 SV=1//3.24592e-66
Cla013695	714.799	305.541	1.2262	2.3395e-06	2.4852e-05	up	sp|P76093|YNBD_ECOLI Uncharacterized protein YnbD OS=Escherichia coli (strain K12) GN=ynbD PE=1 SV=1//4.03884e-15
Cla013697	43770.7	16549.5	1.4032	3.4076e-08	5.2559e-07	up	sp|Q9LZ23|ACR12_ARATH ACT domain-containing protein ACR12 OS=Arabidopsis thaliana GN=ACR12 PE=2 SV=1//2.98434e-111
Cla013710	65.2296	16.8132	1.9559	0.0017148	0.0083227	up	sp|Q6NTR1|MET13_XENLA Methyltransferase-like protein 13 OS=Xenopus laevis GN=mettl13 PE=2 SV=1//1.63277e-15
Cla013718	2485.56	824.963	1.5912	1.3026e-12	4.0183e-11	up	-//-
Cla013721	7807.87	930.315	3.0691	8.8068e-20	5.8407e-18	up	sp|Q2N2K1|PHYK1_SOYBN Probable phytol kinase 1, chloroplastic OS=Glycine max PE=2 SV=1//8.04736e-105
Cla013725	1340.53	905.57	0.56591	0.010611	0.038265	up	-//-
Cla013728	1119.33	702.028	0.67304	0.0044184	0.01858	up	-//-
Cla013731	4243.58	2892.13	0.55315	0.009027	0.033543	up	sp|Q84K00|NAC78_ARATH NAC domain-containing protein 78 OS=Arabidopsis thaliana GN=NAC078 PE=2 SV=2//1.9808e-131
Cla013732	1533.06	578.05	1.4072	2.3051e-09	4.3213e-08	up	sp|O49841|RAC2A_ARATH Ras-related protein RABC2a OS=Arabidopsis thaliana GN=RABC2A PE=1 SV=1//4.0142e-83
Cla013742	17711.9	10904.3	0.69982	0.00056244	0.0031626	up	sp|P32826|SCP49_ARATH Serine carboxypeptidase-like 49 OS=Arabidopsis thaliana GN=SCPL49 PE=2 SV=2//0
Cla013744	1934.34	1263.03	0.61495	0.0054692	0.022207	up	-//-
Cla013749	551.983	270.367	1.0297	0.00017518	0.0011526	up	sp|P35159|RLUB_BACSU Ribosomal large subunit pseudouridine synthase B OS=Bacillus subtilis (strain 168) GN=rluB PE=1 SV=2//1.58454e-34
Cla013765	1152.03	297.269	1.9543	2.1244e-14	7.9728e-13	up	sp|Q9SV30|GATA8_ARATH GATA transcription factor 8 OS=Arabidopsis thaliana GN=GATA8 PE=2 SV=1//4.37077e-17
Cla013766	2635.36	1008.46	1.3859	3.1117e-10	6.7184e-09	up	sp|Q653H7|ARFR_ORYSJ Auxin response factor 18 OS=Oryza sativa subsp. japonica GN=ARF18 PE=2 SV=1//0
Cla013767	21593.7	15049.5	0.52089	0.0075821	0.029181	up	sp|Q9FGZ9|UBL5_ARATH Ubiquitin-like protein 5 OS=Arabidopsis thaliana GN=UBL5 PE=3 SV=1//3.12282e-47
Cla013768	1875.97	1175.25	0.67467	0.0023215	0.010837	up	sp|Q88C93|ALGC_PSEPK Phosphomannomutase/phosphoglucomutase OS=Pseudomonas putida (strain KT2440) GN=algC PE=3 SV=1//2.94926e-32
Cla013776	4023.56	1657.53	1.2794	2.3749e-09	4.4439e-08	up	sp|P57720|AROC_ARATH Chorismate synthase, chloroplastic OS=Arabidopsis thaliana GN=EMB1144 PE=2 SV=2//0
Cla013777	3497.54	2315.99	0.59471	0.0050607	0.020815	up	sp|P52902|ODPA_PEA Pyruvate dehydrogenase E1 component subunit alpha, mitochondrial OS=Pisum sativum PE=2 SV=1//0
Cla013781	3855.66	2573.15	0.58344	0.0044941	0.018845	up	sp|Q9SRE4|UGAL2_ARATH UDP-galactose transporter 2 OS=Arabidopsis thaliana GN=UDP-GALT2 PE=2 SV=1//3.91552e-76
Cla013782	3099.72	1813	0.77376	0.00034592	0.0020648	up	sp|P34788|RS18_ARATH 40S ribosomal protein S18 OS=Arabidopsis thaliana GN=RPS18A PE=1 SV=1//2.29944e-95
Cla013788	9977.25	4874.82	1.0333	8.7446e-07	1.0173e-05	up	sp|Q8H0Z6|IP5P3_ARATH Type IV inositol polyphosphate 5-phosphatase 3 OS=Arabidopsis thaliana GN=IP5P3 PE=1 SV=1//0
Cla013800	451.802	93.8209	2.2677	3.0439e-13	1.0161e-11	up	-//-
Cla013805	3040.69	375.878	3.0161	2.7178e-37	6.1547e-35	up	sp|P0C8Z0|Y8359_ORYSI Uncharacterized protein OsI_027940 OS=Oryza sativa subsp. indica GN=OsI_027940 PE=1 SV=2//5.55831e-32
Cla013825	2455.44	1586.66	0.62999	0.0035134	0.015337	up	sp|Q9MA74|SDC1_ARATH Serine decarboxylase OS=Arabidopsis thaliana GN=SDC PE=1 SV=1//0
Cla013826	11044.8	2048.29	2.4309	6.1778e-25	6.5138e-23	up	sp|P27524|CB4A_SOLLC Chlorophyll a-b binding protein CP24 10A, chloroplastic OS=Solanum lycopersicum GN=CAP10A PE=3 SV=1//1.06437e-148
Cla013830	1277.24	803.417	0.66881	0.0035911	0.015615	up	sp|Q2MHE4|HT1_ARATH Serine/threonine-protein kinase HT1 OS=Arabidopsis thaliana GN=HT1 PE=1 SV=1//1.40774e-62
Cla013862	27004.8	4639.72	2.5411	1.8553e-07	2.4671e-06	up	sp|Q84VY3|STAD6_ARATH Acyl-[acyl-carrier-protein] desaturase 6, chloroplastic OS=Arabidopsis thaliana GN=S-ACP-DES6 PE=2 SV=2//0
Cla013875	33356.7	10930.2	1.6097	8.9919e-09	1.5276e-07	up	sp|O49286|SKP2B_ARATH F-box protein SKP2B OS=Arabidopsis thaliana GN=SKP2B PE=1 SV=1//1.17582e-140
Cla013902	6208.76	1967.05	1.6583	9.561e-15	3.7282e-13	up	sp|Q0GZS3|USP_CUCME UDP-sugar pyrophosphorylase OS=Cucumis melo GN=USP PE=1 SV=1//0
Cla013903	1495.44	938.449	0.67223	0.0029091	0.013142	up	sp|Q9ZNQ8|PERK4_ARATH Proline-rich receptor-like protein kinase PERK4 OS=Arabidopsis thaliana GN=PERK4 PE=1 SV=1//9.80906e-75
Cla013914	35164.6	14351.7	1.2929	1.9862e-10	4.4225e-09	up	sp|Q1GE19|TOLB_RUEST Protein TolB OS=Ruegeria sp. (strain TM1040) GN=tolB PE=3 SV=1//6.6837e-09
Cla013919	3468.88	1316.71	1.3975	1.3509e-10	3.1014e-09	up	sp|Q9XI05|PSB3A_ARATH Proteasome subunit beta type-3-A OS=Arabidopsis thaliana GN=PBC1 PE=1 SV=2//1.70407e-129
Cla013932	1004.85	514.999	0.96434	6.536e-05	0.00048801	up	-//-
Cla013939	2264.54	708.031	1.6773	1.2889e-13	4.4747e-12	up	sp|Q9MBA1|CAO_ARATH Chlorophyllide a oxygenase, chloroplastic OS=Arabidopsis thaliana GN=CAO PE=1 SV=1//0
Cla013951	2370.16	1453.16	0.70579	0.00076925	0.0041454	up	sp|Q9SUF1|WTR31_ARATH WAT1-related protein At4g08290 OS=Arabidopsis thaliana GN=At4g08290 PE=2 SV=1//7.15373e-150
Cla013992	3743.51	1499.9	1.3195	1.1774e-09	2.3323e-08	up	sp|O22193|PUB4_ARATH U-box domain-containing protein 4 OS=Arabidopsis thaliana GN=PUB4 PE=1 SV=3//2.06624e-121
Cla013994	594.847	241.681	1.2994	1.6417e-06	1.8065e-05	up	sp|O22193|PUB4_ARATH U-box domain-containing protein 4 OS=Arabidopsis thaliana GN=PUB4 PE=1 SV=3//7.76821e-07
Cla013998	2573.41	1693.55	0.60363	0.0064442	0.025499	up	sp|F4JS25|SRFR1_ARATH Suppressor of RPS4-RLD 1 OS=Arabidopsis thaliana GN=SRFR1 PE=1 SV=1//0
Cla014004	187.981	11.1355	4.0773	1.2083e-16	5.9455e-15	up	-//-
Cla014005	25063.2	10525.8	1.2516	1.5657e-09	3.0176e-08	up	sp|O65351|SBT17_ARATH Subtilisin-like protease SBT1.7 OS=Arabidopsis thaliana GN=SBT1.7 PE=1 SV=1//0
Cla014007	2254.29	932.968	1.2728	1.1984e-08	1.9902e-07	up	sp|Q8VZJ7|P4H9_ARATH Probable prolyl 4-hydroxylase 9 OS=Arabidopsis thaliana GN=P4H9 PE=2 SV=1//1.54431e-101
Cla014027	1519.68	536.935	1.501	1.7203e-10	3.8874e-09	up	sp|O49204|KAPS_CATRO Adenylyl-sulfate kinase, chloroplastic OS=Catharanthus roseus GN=AKN PE=2 SV=1//5.89281e-116
Cla014028	66.1217	8.9063	2.8922	0.0085246	0.032101	up	sp|Q9M2W8|Y3990_ARATH BTB/POZ domain-containing protein At3g49900 OS=Arabidopsis thaliana GN=At3g49900 PE=2 SV=1//4.08549e-87
Cla014029	79.1148	2.58818	4.9339	0.00056937	0.0031971	up	sp|Q8S9H7|DIV_ANTMA Transcription factor DIVARICATA OS=Antirrhinum majus GN=DIVARICATA PE=2 SV=1//1.24405e-32
Cla014032	1285.66	639.804	1.0068	1.2289e-05	0.00010895	up	sp|Q9FJW6|PP451_ARATH Pentatricopeptide repeat-containing protein At5g67570, chloroplastic OS=Arabidopsis thaliana GN=DG1 PE=1 SV=2//0
Cla014044	2176.75	1483.49	0.55319	0.011664	0.041424	up	-//-
Cla014068	9045.65	2906.02	1.6382	1.0586e-14	4.1042e-13	up	sp|P19446|MDHG_CITLA Malate dehydrogenase, glyoxysomal OS=Citrullus lanatus PE=1 SV=1//0
Cla014082	731.598	244.938	1.5786	1.6615e-09	3.1776e-08	up	sp|Q38827|IAA9_ARATH Auxin-responsive protein IAA9 OS=Arabidopsis thaliana GN=IAA9 PE=1 SV=1//6.97672e-113
Cla014083	1349.63	542.162	1.3158	0.00040849	0.0023914	up	sp|Q9LSK9|Y5566_ARATH Uncharacterized protein At5g65660 OS=Arabidopsis thaliana GN=At5g65660 PE=2 SV=1//1.4125e-29
Cla014088	2724.33	606.074	2.1683	9.4745e-19	5.7739e-17	up	sp|P50433|GLYM_SOLTU Serine hydroxymethyltransferase, mitochondrial OS=Solanum tuberosum PE=2 SV=1//0
Cla014100	374.707	182.815	1.0354	0.00044397	0.0025727	up	sp|Q8GWU7|SKI34_ARATH Protein SKIP34 OS=Arabidopsis thaliana GN=SKIP34 PE=1 SV=1//1.59396e-11
Cla014107	603.548	322.372	0.90474	0.00069738	0.0037992	up	sp|Q5H8A4|PIGG_HUMAN GPI ethanolamine phosphate transferase 2 OS=Homo sapiens GN=PIGG PE=1 SV=1//9.72556e-66
Cla014114	1625.59	398.692	2.0276	3.4396e-17	1.8182e-15	up	-//-
Cla014120	1484.66	538.587	1.4629	1.5924e-07	2.1412e-06	up	-//-
Cla014129	730.85	236.165	1.6298	1.0754e-09	2.156e-08	up	sp|Q75LR7|SAPK1_ORYSJ Serine/threonine-protein kinase SAPK1 OS=Oryza sativa subsp. japonica GN=SAPK1 PE=1 SV=1//0
Cla014133	708.951	242.257	1.5491	5.6241e-09	9.8921e-08	up	sp|P29976|AROF_ARATH Phospho-2-dehydro-3-deoxyheptonate aldolase 1, chloroplastic OS=Arabidopsis thaliana GN=DHS1 PE=2 SV=2//0
Cla014138	584.298	337.208	0.79307	0.0027746	0.012621	up	sp|Q6GLL2|ABH6A_XENLA Monoacylglycerol lipase abhd6-A OS=Xenopus laevis GN=abhd6-a PE=2 SV=1//4.25402e-19
Cla014150	6281.87	2727.99	1.2034	1.4694e-08	2.4042e-07	up	-//-
Cla014155	1053.62	420.091	1.3266	0.0088898	0.033144	up	sp|Q5HZ05|TPPJ_ARATH Probable trehalose-phosphate phosphatase J OS=Arabidopsis thaliana GN=TPPJ PE=1 SV=1//1.12264e-154
Cla014165	77.1359	26.9378	1.5178	0.006406	0.025369	up	sp|Q9SCY3|PNSL4_ARATH Photosynthetic NDH subunit of lumenal location 4, chloroplastic OS=Arabidopsis thaliana GN=PNSL4 PE=1 SV=1//1.19393e-84
Cla014166	6257.96	1450.35	2.1093	1.64e-10	3.718e-09	up	sp|Q9SZN7|HIP26_ARATH Heavy metal-associated isoprenylated plant protein 26 OS=Arabidopsis thaliana GN=HIPP26 PE=1 SV=1//8.41084e-43
Cla014167	3037.61	1301.19	1.2231	1.7926e-08	2.8948e-07	up	sp|Q9LX20|ASPL1_ARATH Aspartic proteinase-like protein 1 OS=Arabidopsis thaliana GN=At5g10080 PE=1 SV=1//0
Cla014171	2699.65	848.542	1.6697	8.5715e-07	9.989e-06	up	-//-
Cla014172	4259.06	877.532	2.279	2.1152e-19	1.3467e-17	up	sp|Q9ZU51|RHA2B_ARATH Probable E3 ubiquitin-protein ligase RHA2B OS=Arabidopsis thaliana GN=RHA2B PE=1 SV=2//2.38059e-18
Cla014173	15233.3	5730.01	1.4106	1.1581e-09	2.2987e-08	up	-//-
Cla014176	29.6064	0	Inf	2.3039e-06	2.4513e-05	up	sp|Q9M0G0|GAGT3_ARATH Gamma-glutamyltranspeptidase 3 OS=Arabidopsis thaliana GN=GGT3 PE=2 SV=1//4.38273e-07
Cla014180	280.787	0	Inf	9.7711e-19	5.9185e-17	up	sp|H2DH18|C7A12_PANGI Cytochrome P450 CYP736A12 OS=Panax ginseng PE=2 SV=1//5.39378e-176
Cla014185	1657.02	547.243	1.5983	7.1725e-12	2.0047e-10	up	sp|P73627|Y1770_SYNY3 Uncharacterized protein sll1770 OS=Synechocystis sp. (strain PCC 6803 / Kazusa) GN=sll1770 PE=3 SV=1//1.55908e-167
Cla014189	2275.24	9.54759	7.8967	4.7641e-24	4.5643e-22	up	sp|Q94A84|U72E1_ARATH UDP-glycosyltransferase 72E1 OS=Arabidopsis thaliana GN=UGT72E1 PE=1 SV=1//2.00468e-153
Cla014190	1691.37	32.1707	5.7163	1.1346e-41	3.2767e-39	up	sp|Q9FGT9|GPDL6_ARATH Glycerophosphodiester phosphodiesterase GDPDL6 OS=Arabidopsis thaliana GN=GDPDL6 PE=2 SV=1//0
Cla014191	4298.95	2119.01	1.0206	1.6113e-06	1.776e-05	up	sp|D1ZKF3|AMPP1_SORMK Probable Xaa-Pro aminopeptidase P OS=Sordaria macrospora (strain ATCC MYA-333 / DSM 997 / K(L3346) / K-hell) GN=AMPP PE=3 SV=1//1.21997e-163
Cla014201	1338.44	856.36	0.64427	0.0053426	0.021759	up	-//-
Cla014203	875.343	506.661	0.78883	0.0011429	0.0058717	up	-//-
Cla014205	6369.24	3664.87	0.79736	0.00012458	0.00085934	up	sp|Q9FL03|SCL4_ARATH Scarecrow-like protein 4 OS=Arabidopsis thaliana GN=SCL4 PE=2 SV=1//0
Cla014206	2651.4	379.177	2.8058	3.9671e-32	6.5336e-30	up	-//-
Cla014221	1275.15	850.502	0.58428	0.0092566	0.034262	up	sp|Q8VXX4|RFC3_ARATH Replication factor C subunit 3 OS=Arabidopsis thaliana GN=RFC3 PE=2 SV=1//7.68638e-81
Cla014222	4433.45	1212.26	1.8707	7.2518e-18	4.0227e-16	up	sp|Q93V56|IPYR1_ARATH Soluble inorganic pyrophosphatase 1 OS=Arabidopsis thaliana GN=PPA1 PE=1 SV=1//3.28654e-125
Cla014229	775.644	424.296	0.87032	0.00057592	0.0032256	up	sp|Q6NQL6|LPPE2_ARATH Lipid phosphate phosphatase epsilon 2, chloroplastic OS=Arabidopsis thaliana GN=LPPE2 PE=1 SV=1//3.49073e-77
Cla014239	1372.74	614.543	1.1595	5.6151e-05	0.00042742	up	sp|Q9P6Q3|BCS1_SCHPO Probable mitochondrial chaperone bcs1 OS=Schizosaccharomyces pombe (strain 972 / ATCC 24843) GN=SPAC644.07 PE=2 SV=1//2.6195e-33
Cla014262	110.417	36.4084	1.6006	0.0086879	0.032562	up	sp|Q9FH57|GATA5_ARATH GATA transcription factor 5 OS=Arabidopsis thaliana GN=GATA5 PE=2 SV=1//2.5809e-49
Cla014274	214.014	100.487	1.0907	0.0022927	0.010728	up	sp|P33081|AX15A_SOYBN Auxin-induced protein 15A OS=Glycine max PE=2 SV=1//5.60442e-22
Cla014278	434.856	189.591	1.1976	2.9304e-05	0.00023973	up	-//-
Cla014290	54.9976	6.33978	3.1169	5.977e-05	0.00045066	up	sp|Q8S9L6|CRK29_ARATH Cysteine-rich receptor-like protein kinase 29 OS=Arabidopsis thaliana GN=CRK29 PE=2 SV=1//6.3657e-163
Cla014291	52.4109	1.00054	5.711	1.9089e-08	3.07e-07	up	sp|P50699|TLPH_ARATH Thaumatin-like protein OS=Arabidopsis thaliana GN=At1g18250 PE=2 SV=2//1.59498e-64
Cla014292	190.967	55.2981	1.788	0.0010564	0.0054865	up	sp|P50699|TLPH_ARATH Thaumatin-like protein OS=Arabidopsis thaliana GN=At1g18250 PE=2 SV=2//1.33994e-76
Cla014295	7349.73	1579.95	2.2178	5.8996e-21	4.4365e-19	up	sp|Q9FKW8|STR18_ARATH Thiosulfate sulfurtransferase 18 OS=Arabidopsis thaliana GN=STR18 PE=1 SV=1//1.29996e-39
Cla014297	57015.9	12617.5	2.1759	3.8914e-16	1.842e-14	up	sp|C0HJB3|MANA_CANEN Alpha-mannosidase OS=Canavalia ensiformis PE=1 SV=1//0
Cla014298	2463.6	754.336	1.7075	5.1597e-14	1.8593e-12	up	sp|Q9SXU1|PSA7_CICAR Proteasome subunit alpha type-7 OS=Cicer arietinum GN=PAD1 PE=2 SV=1//1.69364e-09
Cla014303	515.726	323.107	0.67459	0.010468	0.037819	up	sp|Q9MBA3|RAD17_ARATH Cell cycle checkpoint protein RAD17 OS=Arabidopsis thaliana GN=RAD17 PE=2 SV=1//1.6705e-163
Cla014316	487.87	229.957	1.0851	0.0001049	0.00073735	up	sp|Q9LX20|ASPL1_ARATH Aspartic proteinase-like protein 1 OS=Arabidopsis thaliana GN=At5g10080 PE=1 SV=1//5.96264e-71
Cla014321	34492.8	19532.3	0.82043	6.1776e-05	0.00046385	up	sp|Q42560|ACO1_ARATH Aconitate hydratase 1 OS=Arabidopsis thaliana GN=ACO1 PE=1 SV=2//0
Cla014328	1250.28	674.549	0.89025	0.00015036	0.0010136	up	sp|Q8L540|LTO1_ARATH Thiol-disulfide oxidoreductase LTO1 OS=Arabidopsis thaliana GN=LTO1 PE=1 SV=1//3.88239e-124
Cla014344	116.859	39.8015	1.5539	0.0012385	0.0063076	up	sp|Q9SEY5|AAE2_ARATH Probable acyl-activating enzyme 2 OS=Arabidopsis thaliana GN=AAE2 PE=2 SV=1//0
Cla014367	2935.7	2023.19	0.53707	0.011824	0.041853	up	sp|Q9SAK5|APL_ARATH Myb family transcription factor APL OS=Arabidopsis thaliana GN=APL PE=2 SV=2//2.63034e-34
Cla014375	5759.81	2251.5	1.3551	0.00015462	0.0010354	up	sp|Q75LU8|CNBL3_ORYSJ Calcineurin B-like protein 3 OS=Oryza sativa subsp. japonica GN=CBL3 PE=1 SV=1//2.77155e-151
Cla014383	429.416	162.064	1.4058	1.9013e-06	2.0614e-05	up	sp|Q9SIE0|ALKB2_ARATH Alpha-ketoglutarate-dependent dioxygenase alkB homolog 2 OS=Arabidopsis thaliana GN=ALKBH2 PE=2 SV=2//1.48732e-104
Cla014384	18207.5	5965.7	1.6098	6.0667e-15	2.4131e-13	up	sp|Q9FIK8|CAR11_ARATH Protein C2-DOMAIN ABA-RELATED 11 OS=Arabidopsis thaliana GN=CAR11 PE=2 SV=1//2.62192e-79
Cla014386	400.4	109.047	1.8765	1.6511e-09	3.1607e-08	up	sp|Q94B74|NUDT2_ARATH Nudix hydrolase 2 OS=Arabidopsis thaliana GN=NUDT2 PE=1 SV=1//2.79947e-113
Cla014389	50700.6	20356.7	1.3165	1.4069e-08	2.3171e-07	up	-//-
Cla014391	62.1997	0.935179	6.0555	4.1482e-09	7.4742e-08	up	sp|Q8GYX3|MP705_ARATH Microtubule-associated protein 70-5 OS=Arabidopsis thaliana GN=MAP70.5 PE=1 SV=1//7.48838e-147
Cla014394	429.616	173.993	1.304	8.941e-06	8.2034e-05	up	-//-
Cla014400	3145.05	1949.85	0.68972	0.0081648	0.031033	up	sp|O22193|PUB4_ARATH U-box domain-containing protein 4 OS=Arabidopsis thaliana GN=PUB4 PE=1 SV=3//2.47191e-71
Cla014403	44912.1	13862.1	1.696	8.9609e-16	4.0129e-14	up	-//-
Cla014405	932.284	526.031	0.82562	0.012481	0.043704	up	-//-
Cla014407	2878.76	1631.99	0.81882	0.00012824	0.00088245	up	sp|A5PKH3|FAAA_BOVIN Fumarylacetoacetase OS=Bos taurus GN=FAH PE=2 SV=1//0
Cla014410	179.344	88.617	1.0171	0.013106	0.045484	up	-//-
Cla014416	102870	20382.6	2.3354	1.6588e-28	2.1748e-26	up	sp|Q96398|CHRC_CUCSA Chromoplast-specific carotenoid-associated protein, chromoplast OS=Cucumis sativus GN=CHRC PE=1 SV=1//0
Cla014428	460.044	247.751	0.89288	0.0013612	0.0068313	up	-//-
Cla014429	2584.4	1659.24	0.63931	0.0032345	0.014346	up	sp|O94903|PROSC_HUMAN Proline synthase co-transcribed bacterial homolog protein OS=Homo sapiens GN=PROSC PE=1 SV=1//4.24204e-72
Cla014439	1094.71	508.61	1.1059	3.5721e-06	3.6429e-05	up	-//-
Cla014443	6619.4	2742.07	1.2714	3.0434e-05	0.00024795	up	sp|P92979|APR1_ARATH 5&apos;-adenylylsulfate reductase 1, chloroplastic OS=Arabidopsis thaliana GN=APR1 PE=1 SV=2//0
Cla014446	1129.32	295.705	1.9332	1.5547e-14	5.9239e-13	up	sp|Q9SA96|AROD1_ARATH Arogenate dehydratase/prephenate dehydratase 1, chloroplastic OS=Arabidopsis thaliana GN=ADT1 PE=1 SV=1//4.24784e-160
Cla014449	1631.54	208.794	2.9661	8.7475e-32	1.4289e-29	up	sp|Q6Z1D5|ATG8C_ORYSJ Autophagy-related protein 8C OS=Oryza sativa subsp. japonica GN=ATG8C PE=2 SV=1//1.07409e-69
Cla014452	1010.12	583.069	0.79279	0.0028275	0.012821	up	sp|P29790|ATPG_TOBAC ATP synthase gamma chain, chloroplastic OS=Nicotiana tabacum GN=ATPC PE=1 SV=1//0
Cla014454	2255.18	613.252	1.8787	1.9935e-16	9.6656e-15	up	sp|Q9ZSA2|CDPKL_ARATH Calcium-dependent protein kinase 21 OS=Arabidopsis thaliana GN=CPK21 PE=1 SV=1//0
Cla014455	274.552	107.184	1.357	0.00015431	0.0010337	up	-//-
Cla014487	1156.25	755.811	0.61336	0.0085912	0.032278	up	sp|Q8DI01|FABZ_THEEB 3-hydroxyacyl-[acyl-carrier-protein] dehydratase FabZ OS=Thermosynechococcus elongatus (strain BP-1) GN=fabZ PE=3 SV=1//1.2168e-48
Cla014492	2811.74	977.548	1.5242	6.5643e-12	1.8476e-10	up	sp|E9L7A5|PAT_PETHY Bifunctional aspartate aminotransferase and glutamate/aspartate-prephenate aminotransferase OS=Petunia hybrida PE=1 SV=1//0
Cla014528	2164.17	812.603	1.4132	0.010057	0.036624	up	sp|Q9FGY4|FB341_ARATH F-box protein At5g49610 OS=Arabidopsis thaliana GN=At5g49610 PE=1 SV=1//6.1437e-13
Cla014544	540.585	253.439	1.0929	0.0044816	0.018802	up	sp|Q70E96|AL3F1_ARATH Aldehyde dehydrogenase family 3 member F1 OS=Arabidopsis thaliana GN=ALDH3F1 PE=2 SV=2//0
Cla014563	1473.65	506.652	1.5403	9.609e-05	0.00068194	up	sp|O23240|D2HDH_ARATH D-2-hydroxyglutarate dehydrogenase, mitochondrial OS=Arabidopsis thaliana GN=D2HGDH PE=1 SV=3//0
Cla014575	3670.3	1820.03	1.0119	0.0016651	0.0081307	up	sp|Q9P6Q3|BCS1_SCHPO Probable mitochondrial chaperone bcs1 OS=Schizosaccharomyces pombe (strain 972 / ATCC 24843) GN=SPAC644.07 PE=2 SV=1//5.46974e-29
Cla014592	1102.88	594.479	0.89158	0.00020339	0.0013115	up	sp|P93031|GMD2_ARATH GDP-mannose 4,6 dehydratase 2 OS=Arabidopsis thaliana GN=MUR1 PE=1 SV=3//0
Cla014596	1438.42	663.221	1.1169	3.0315e-06	3.1383e-05	up	sp|Q40784|AAPC_CENCI Putative glucose-6-phosphate 1-epimerase OS=Cenchrus ciliaris PE=2 SV=1//2.77562e-36
Cla014602	751.658	332.561	1.1765	3.325e-06	3.4102e-05	up	sp|G5DBJ0|CPP1_NICBE Protein CHAPERONE-LIKE PROTEIN OF POR1, chloroplastic OS=Nicotiana benthamiana GN=CPP1 PE=1 SV=1//5.67627e-14
Cla014643	1614.27	985.977	0.71125	0.0013816	0.0069247	up	sp|Q54KJ8|T2EB_DICDI General transcription factor IIE subunit 2 OS=Dictyostelium discoideum GN=gtf2e2 PE=3 SV=1//2.10463e-06
Cla014654	3650.19	893.937	2.0297	1.1082e-19	7.2643e-18	up	sp|Q9CAK8|ISPF_ARATH 2-C-methyl-D-erythritol 2,4-cyclodiphosphate synthase, chloroplastic OS=Arabidopsis thaliana GN=ISPF PE=1 SV=1//8.25861e-109
Cla014670	2413.1	1108.43	1.1224	4.0785e-06	4.0781e-05	up	-//-
Cla014674	17850.9	9593.42	0.89588	1.0395e-05	9.3864e-05	up	sp|P46423|GSTF_HYOMU Glutathione S-transferase OS=Hyoscyamus muticus PE=1 SV=1//1.10602e-93
Cla014676	3502.31	1320.61	1.4071	6.8821e-11	1.6879e-09	up	sp|P30109|GSTF1_TOBAC Glutathione S-transferase PARB OS=Nicotiana tabacum GN=PARB PE=2 SV=1//1.55316e-94
Cla014707	122.207	23.6635	2.3686	2.6491e-06	2.7756e-05	up	-//-
Cla014724	7771.68	4055.72	0.93827	6.0439e-06	5.7822e-05	up	sp|O24467|LE14B_PRUAR LEC14B homolog OS=Prunus armeniaca PE=2 SV=1//0
Cla014732	2764.4	1317.6	1.0691	1.1749e-06	1.3311e-05	up	sp|P33487|ABP1_ARATH Auxin-binding protein 1 OS=Arabidopsis thaliana GN=ERABP1 PE=1 SV=1//2.44636e-93
Cla014734	1826.38	1113.6	0.71376	0.0014227	0.0070861	up	sp|Q3SX22|BSDC1_BOVIN BSD domain-containing protein 1 OS=Bos taurus GN=BSDC1 PE=2 SV=1//1.89545e-18
Cla014738	578.935	304.174	0.9285	0.00041981	0.0024505	up	sp|Q944J0|SPCS1_ARATH Probable signal peptidase complex subunit 1 OS=Arabidopsis thaliana GN=At2g22425 PE=2 SV=1//3.37586e-31
Cla014741	1300.26	354.225	1.8761	3.0283e-05	0.00024682	up	sp|Q8L735|ISOA2_ARATH Isoamylase 2, chloroplastic OS=Arabidopsis thaliana GN=ISA2 PE=1 SV=2//0
Cla014746	3686.98	1636.71	1.1716	6.4888e-08	9.4801e-07	up	-//-
Cla014750	2539.69	1734.9	0.5498	0.0092789	0.034319	up	sp|Q9KG32|Y283_BACHD Uncharacterized isomerase BH0283 OS=Bacillus halodurans (strain ATCC BAA-125 / DSM 18197 / FERM 7344 / JCM 9153 / C-125) GN=BH0283 PE=3 SV=1//5.89129e-54
Cla014766	1422.84	719.589	0.98352	1.957e-05	0.0001666	up	sp|Q7ZXR3|NAA20_XENLA N-alpha-acetyltransferase 20 OS=Xenopus laevis GN=naa20 PE=2 SV=1//2.17141e-44
Cla014776	11275.2	5323	1.0828	2.2976e-07	2.9945e-06	up	-//-
Cla014777	2694.45	1589.41	0.7615	0.00047341	0.0027211	up	sp|Q54UI3|WDR4_DICDI tRNA (guanine-N(7)-)-methyltransferase non-catalytic subunit wdr4 OS=Dictyostelium discoideum GN=wdr4 PE=3 SV=1//2.1628e-18
Cla014779	1582.97	1039.75	0.6064	0.0067667	0.026566	up	sp|Q9M1W7|SKI30_ARATH F-box/kelch-repeat protein SKIP30 OS=Arabidopsis thaliana GN=SKIP30 PE=1 SV=2//3.55744e-131
Cla014781	5564.11	3613.66	0.62269	0.014008	0.048022	up	sp|Q9SPL4|AMP22_MACIN Vicilin-like antimicrobial peptides 2-2 OS=Macadamia integrifolia GN=AMP2-2 PE=2 SV=1//1.51513e-100
Cla014786	6749.95	2378.26	1.505	8.0691e-13	2.5605e-11	up	sp|Q2MHE4|HT1_ARATH Serine/threonine-protein kinase HT1 OS=Arabidopsis thaliana GN=HT1 PE=1 SV=1//4.49472e-66
Cla014812	774.928	469.314	0.72351	0.0033071	0.014603	up	sp|Q9LE82|RAGP1_ARATH RAN GTPase-activating protein 1 OS=Arabidopsis thaliana GN=RANGAP1 PE=1 SV=1//0
Cla014813	10503	2110.16	2.3154	1.2197e-26	1.381e-24	up	sp|Q941F1|PLA15_ARATH Phospholipase A1-Igamma1, chloroplastic OS=Arabidopsis thaliana GN=At1g06800 PE=1 SV=2//1.61186e-139
Cla014815	4619.42	1309.2	1.819	1.1428e-10	2.6731e-09	up	sp|Q39194|PSBW_ARATH Photosystem II reaction center W protein, chloroplastic OS=Arabidopsis thaliana GN=PSBW PE=1 SV=2//1.14807e-19
Cla014826	317.496	0.935179	8.4073	5.8746e-33	1.018e-30	up	sp|Q40062|IDS3_HORVU 2&apos;-deoxymugineic-acid 2&apos;-dioxygenase OS=Hordeum vulgare GN=IDS3 PE=1 SV=3//2.26086e-36
Cla014827	15516.7	30.1215	9.0088	1.3424e-192	1.3375e-188	up	sp|Q40062|IDS3_HORVU 2&apos;-deoxymugineic-acid 2&apos;-dioxygenase OS=Hordeum vulgare GN=IDS3 PE=1 SV=3//1.64464e-42
Cla014843	3256.34	2050.22	0.66747	0.0016109	0.0079	up	sp|Q9CPW2|ADXL_MOUSE Adrenodoxin-like protein, mitochondrial OS=Mus musculus GN=Fdx1l PE=2 SV=1//9.20739e-09
Cla014848	6300.82	1377.27	2.1937	2.1478e-14	8.0453e-13	up	sp|P07519|CBP1_HORVU Serine carboxypeptidase 1 OS=Hordeum vulgare GN=CBP1 PE=1 SV=4//0
Cla014856	926.588	598.812	0.62982	0.0090258	0.033543	up	sp|Q6AZD4|IMP2L_DANRE Mitochondrial inner membrane protease subunit 2 OS=Danio rerio GN=immp2l PE=2 SV=1//5.89102e-09
Cla014870	1000.07	496.718	1.0096	3.1761e-05	0.00025792	up	sp|Q8RXE8|BASS3_ARATH Probable sodium/metabolite cotransporter BASS3, chloroplastic OS=Arabidopsis thaliana GN=BASS3 PE=2 SV=1//4.32048e-165
Cla014871	2890.55	795.289	1.8618	5.809e-17	2.9913e-15	up	sp|O50064|FIMB2_ARATH Fimbrin-2 OS=Arabidopsis thaliana GN=FIM2 PE=2 SV=1//0
Cla014872	1492.28	761.611	0.97039	2.2438e-05	0.0001882	up	-//-
Cla014885	653.37	355.289	0.87891	0.00058686	0.0032786	up	-//-
Cla014886	463.661	191.481	1.2759	8.5299e-06	7.8587e-05	up	sp|Q56XR7|STR4A_ARATH Rhodanese-like domain-containing protein 4A, chloroplastic OS=Arabidopsis thaliana GN=STR4A PE=2 SV=1//4.54071e-18
Cla014888	476.921	204.813	1.2194	1.8176e-05	0.00015579	up	sp|Q56XR7|STR4A_ARATH Rhodanese-like domain-containing protein 4A, chloroplastic OS=Arabidopsis thaliana GN=STR4A PE=2 SV=1//1.15613e-51
Cla014889	460.146	286.116	0.68549	0.013422	0.046399	up	sp|P19672|YQXC_BACSU Putative rRNA methyltransferase YqxC OS=Bacillus subtilis (strain 168) GN=yqxC PE=3 SV=3//4.28607e-56
Cla014890	1187.77	806.654	0.55823	0.013792	0.047445	up	sp|Q8VZ52|ATG10_ARATH Ubiquitin-like-conjugating enzyme ATG10 OS=Arabidopsis thaliana GN=ATG10 PE=1 SV=1//2.38081e-70
Cla014899	352.884	93.2653	1.9198	4.2439e-09	7.626e-08	up	sp|P19892|RAA5E_ARATH Ras-related protein RABA5e OS=Arabidopsis thaliana GN=RABA5E PE=2 SV=1//2.8495e-104
Cla014904	736.723	402.7	0.87142	0.0012325	0.006283	up	sp|Q9SRT3|CSLC6_ARATH Probable xyloglucan glycosyltransferase 6 OS=Arabidopsis thaliana GN=CSLC6 PE=1 SV=1//0
Cla014905	5548.55	1206.11	2.2018	7.0073e-24	6.6181e-22	up	sp|Q9SRT2|BH062_ARATH Transcription factor bHLH62 OS=Arabidopsis thaliana GN=BHLH62 PE=2 SV=1//3.03365e-90
Cla014915	2035.15	1158.91	0.81236	0.0002277	0.001446	up	-//-
Cla014918	1615.31	1092.2	0.56457	0.011691	0.041494	up	sp|Q9LSG3|GAUT8_ARATH Galacturonosyltransferase 8 OS=Arabidopsis thaliana GN=GAUT8 PE=1 SV=1//0
Cla014920	6799.39	3588.53	0.92201	9.4757e-06	8.639e-05	up	sp|Q9SV68|QORH_ARATH Putative quinone-oxidoreductase homolog, chloroplastic OS=Arabidopsis thaliana GN=At4g13010 PE=2 SV=1//3.35965e-163
Cla014921	57.0824	8.87357	2.6855	0.0072033	0.028015	up	sp|Q9SV68|QORH_ARATH Putative quinone-oxidoreductase homolog, chloroplastic OS=Arabidopsis thaliana GN=At4g13010 PE=2 SV=1//8.71173e-137
Cla014925	2403.92	841.883	1.5137	1.9727e-11	5.1803e-10	up	-//-
Cla014927	53699.8	7271.3	2.8846	5.8558e-07	6.9918e-06	up	sp|Q43143|PMEU1_SOLLC Pectinesterase/pectinesterase inhibitor U1 OS=Solanum lycopersicum GN=PMEU1 PE=2 SV=1//0
Cla014936	66.7923	16.671	2.0023	0.0016273	0.0079656	up	sp|Q8GYN5|RIN4_ARATH RPM1-interacting protein 4 OS=Arabidopsis thaliana GN=RIN4 PE=1 SV=1//8.1306e-30
Cla014954	74.4212	6.39446	3.5408	3.8949e-07	4.836e-06	up	sp|P33183|NIGB_SAMNI Nigrin b OS=Sambucus nigra PE=1 SV=2//2.79962e-87
Cla014960	796.864	488.285	0.70661	0.0045946	0.019207	up	sp|Q6GLM5|DESI1_XENLA Desumoylating isopeptidase 1 OS=Xenopus laevis GN=desi1 PE=2 SV=1//9.19239e-40
Cla014965	2089.55	582.381	1.8432	1.5895e-15	6.9465e-14	up	sp|Q8LDV3|Y4320_ARATH Uncharacterized protein At4g13200, chloroplastic OS=Arabidopsis thaliana GN=At4g13200 PE=2 SV=2//5.17684e-22
Cla014971	891.52	287.916	1.6306	1.381e-10	3.1669e-09	up	sp|Q9M8Z7|U80A2_ARATH Sterol 3-beta-glucosyltransferase UGT80A2 OS=Arabidopsis thaliana GN=UGT80A2 PE=1 SV=1//0
Cla014997	10656.5	5318.54	1.0026	4.3224e-06	4.2896e-05	up	-//-
Cla015009	9044.57	4951.41	0.86921	2.2213e-05	0.00018686	up	sp|Q9FGM1|PYL8_ARATH Abscisic acid receptor PYL8 OS=Arabidopsis thaliana GN=PYL8 PE=1 SV=1//8.56962e-92
Cla015014	373.256	109.625	1.7676	7.4411e-08	1.0683e-06	up	sp|Q84JH9|TBL25_ARATH Protein trichome birefringence-like 25 OS=Arabidopsis thaliana GN=TBL25 PE=2 SV=1//1.80902e-161
Cla015019	3208.61	2093.05	0.61634	0.004034	0.017177	up	sp|Q9MA75|VIP1_ARATH Transcription factor VIP1 OS=Arabidopsis thaliana GN=VIP1 PE=1 SV=1//1.32549e-68
Cla015027	5240.92	1793.57	1.547	0.00072012	0.0039071	up	sp|P12886|ADH1_PEA Alcohol dehydrogenase 1 OS=Pisum sativum PE=3 SV=1//0
Cla015028	4074.38	1398.58	1.5426	1.7288e-12	5.2516e-11	up	sp|P13603|ADH1_TRIRP Alcohol dehydrogenase 1 OS=Trifolium repens GN=ADH1 PE=2 SV=1//0
Cla015036	523.644	329.045	0.6703	0.011345	0.040453	up	-//-
Cla015038	5992.4	3346.19	0.84061	5.8514e-05	0.0004427	up	-//-
Cla015047	2758.53	1800.74	0.61531	0.0042359	0.017914	up	-//-
Cla015051	5330.71	585.442	3.1867	4.845e-37	1.0728e-34	up	sp|O82245|TSPO_ARATH Translocator protein homolog OS=Arabidopsis thaliana GN=TSPO PE=1 SV=1//5.08021e-27
Cla015056	976.644	484.07	1.0126	3.1447e-05	0.00025557	up	sp|B9DGU7|TPK1_ARATH Thiamine pyrophosphokinase 1 OS=Arabidopsis thaliana GN=TPK1 PE=2 SV=1//2.28323e-129
Cla015058	4976.07	3203.36	0.63542	0.0024623	0.011411	up	sp|Q6YYB0|Y8359_ORYSJ Uncharacterized protein Os08g0359500 OS=Oryza sativa subsp. japonica GN=Os08g0359500 PE=2 SV=1//1.12626e-49
Cla015064	729.876	319.652	1.1911	0.0034623	0.015151	up	sp|Q8LGG8|USPAL_ARATH Universal stress protein A-like protein OS=Arabidopsis thaliana GN=At3g01520 PE=1 SV=2//3.74913e-14
Cla015083	644.303	319.782	1.0106	9.0871e-05	0.00065092	up	sp|Q8RWM7|CCB3_ARATH Protein COFACTOR ASSEMBLY OF COMPLEX C SUBUNIT B CCB3, chloroplastic OS=Arabidopsis thaliana GN=CCB3 PE=1 SV=1//1.17921e-51
Cla015093	893.847	259.998	1.7815	3.9544e-12	1.1471e-10	up	sp|Q11207|PARP2_ARATH Poly [ADP-ribose] polymerase 2 OS=Arabidopsis thaliana GN=PARP2 PE=2 SV=1//0
Cla015133	1052.95	378.101	1.4776	0.0094633	0.034897	up	-//-
Cla015134	6521.71	4523.99	0.52765	0.010925	0.039198	up	sp|O04834|SAR1A_ARATH GTP-binding protein SAR1A OS=Arabidopsis thaliana GN=SAR1A PE=2 SV=1//4.93994e-120
Cla015143	1519.01	516.736	1.5556	4.5049e-11	1.1278e-09	up	sp|Q8GXW1|RGL2_ARATH DELLA protein RGL2 OS=Arabidopsis thaliana GN=RGL2 PE=1 SV=2//7.08437e-55
Cla015144	1548.84	351.884	2.138	2.8986e-14	1.0717e-12	up	-//-
Cla015151	3852.86	2511.21	0.61755	0.0034037	0.014941	up	sp|Q9SIC9|PP178_ARATH Pentatricopeptide repeat-containing protein At2g31400, chloroplastic OS=Arabidopsis thaliana GN=At2g31400 PE=2 SV=1//0
Cla015154	1999.31	546.823	1.8704	1.4454e-08	2.3696e-07	up	sp|Q93WV4|WRK71_ARATH Probable WRKY transcription factor 71 OS=Arabidopsis thaliana GN=WRKY71 PE=2 SV=1//8.87795e-42
Cla015160	3752.97	753.893	2.3156	1.3244e-24	1.3466e-22	up	sp|Q93W77|NIFU1_ARATH NifU-like protein 1, chloroplastic OS=Arabidopsis thaliana GN=NIFU1 PE=1 SV=1//5.22058e-62
Cla015165	226.925	40.9456	2.4704	3.4212e-10	7.3388e-09	up	sp|Q9LDE1|MY108_ARATH Transcription factor MYB108 OS=Arabidopsis thaliana GN=MYB108 PE=1 SV=1//6.33753e-74
Cla015168	6236.61	1495.58	2.0601	2.3299e-21	1.8067e-19	up	sp|Q9ZST4|GLNB_ARATH Nitrogen regulatory protein P-II homolog OS=Arabidopsis thaliana GN=GLB1 PE=1 SV=1//1.66196e-29
Cla015169	1047.88	583.681	0.84422	0.0003879	0.0022897	up	-//-
Cla015172	1569.33	1019.89	0.62174	0.0050816	0.020888	up	-//-
Cla015187	6129.97	728.832	3.0722	1.631e-19	1.0518e-17	up	sp|A8LHQ6|TOLB_DINSH Protein TolB OS=Dinoroseobacter shibae (strain DSM 16493 / NCIMB 14021 / DFL 12) GN=tolB PE=3 SV=1//8.38057e-10
Cla015195	22970.4	11331.1	1.0195	0.0031689	0.014112	up	sp|P32289|GLNA_VIGAC Glutamine synthetase nodule isozyme OS=Vigna aconitifolia PE=2 SV=1//0
Cla015207	574.479	364.118	0.65785	0.011107	0.03973	up	-//-
Cla015213	2955.88	1246.02	1.2463	1.2643e-08	2.0909e-07	up	sp|Q9LY66|RK1_ARATH 50S ribosomal protein L1, chloroplastic OS=Arabidopsis thaliana GN=RPL1 PE=1 SV=1//2.35576e-156
Cla015228	120866	75037.6	0.68773	0.0074724	0.028817	up	sp|A3BDI8|SAP8_ORYSJ Zinc finger A20 and AN1 domain-containing stress-associated protein 8 OS=Oryza sativa subsp. japonica GN=SAP8 PE=2 SV=1//3.10203e-73
Cla015230	442.608	103.782	2.0925	0.00060078	0.0033405	up	-//-
Cla015232	5123.02	2757.66	0.89355	2.4786e-05	0.00020635	up	sp|E0X9N4|C3H69_ARATH Zinc finger CCCH domain-containing protein 69 OS=Arabidopsis thaliana GN=At3g63550 PE=3 SV=1//2.45425e-138
Cla015233	9565.88	2953.83	1.6953	1.2368e-15	5.429e-14	up	sp|P82658|TL19_ARATH Thylakoid lumenal 19 kDa protein, chloroplastic OS=Arabidopsis thaliana GN=At3g63540 PE=1 SV=2//1.41965e-99
Cla015234	1052.36	551.444	0.93235	0.0001033	0.0007277	up	-//-
Cla015235	1223.99	456.643	1.4225	0.0011507	0.0059067	up	sp|Q9SVY1|ZWIP2_ARATH Zinc finger protein WIP2 OS=Arabidopsis thaliana GN=WIP2 PE=1 SV=1//1.14876e-109
Cla015238	2624.16	1348.05	0.96098	1.2009e-05	0.00010669	up	sp|P22778|ATPO_IPOBA ATP synthase subunit O, mitochondrial OS=Ipomoea batatas PE=1 SV=1//3.29682e-101
Cla015245	3997.36	2036.56	0.97291	4.0623e-06	4.066e-05	up	sp|O65572|CCD1_ARATH Carotenoid 9,10(9&apos;,10&apos;)-cleavage dioxygenase 1 OS=Arabidopsis thaliana GN=CCD1 PE=1 SV=2//1.14203e-12
Cla015260	1256.2	151.353	3.0531	5.4024e-30	7.9161e-28	up	-//-
Cla015269	988.262	563.08	0.81155	0.00072685	0.0039403	up	sp|P82277|RRP2_SPIOL 30S ribosomal protein 2, chloroplastic OS=Spinacia oleracea GN=PSRP2 PE=1 SV=1//6.44486e-88
Cla015275	3179.09	745.583	2.0922	2.1535e-20	1.5058e-18	up	-//-
Cla015281	822.316	480.666	0.77466	0.0028792	0.013014	up	-//-
Cla015282	4325.82	2956.38	0.54914	0.008531	0.032113	up	sp|P49298|CISY_CITMA Citrate synthase, mitochondrial OS=Citrus maxima GN=CIT PE=2 SV=1//0
Cla015302	1074.86	365.613	1.5558	1.7497e-10	3.9445e-09	up	-//-
Cla015306	2650.29	1659.1	0.67575	0.0016982	0.0082681	up	-//-
Cla015308	274.443	131.965	1.0564	0.013447	0.046459	up	sp|Q94AN4|AP2L1_ARATH AP2-like ethylene-responsive transcription factor At1g16060 OS=Arabidopsis thaliana GN=At1g16060 PE=2 SV=1//3.80799e-08
Cla015310	907.689	594.22	0.6112	0.010092	0.036718	up	-//-
Cla015315	6242.13	3634.28	0.78037	0.00018388	0.0012034	up	sp|O64982|PRS7_PRUPE 26S protease regulatory subunit 7 OS=Prunus persica GN=RPT1 PE=2 SV=1//0
Cla015316	5788.85	1382.29	2.0662	1.312e-21	1.05e-19	up	sp|Q9FI78|HST_ARATH Shikimate O-hydroxycinnamoyltransferase OS=Arabidopsis thaliana GN=HST PE=2 SV=1//0
Cla015321	1184.51	624.15	0.92433	7.3621e-05	0.00054157	up	sp|Q8H0W0|LPA3_ARATH Protein LOW PSII ACCUMULATION 3, chloroplastic OS=Arabidopsis thaliana GN=LPA3 PE=1 SV=1//2.77889e-152
Cla015323	874.354	473.783	0.88399	0.00030612	0.0018624	up	sp|P05100|3MG1_ECOLI DNA-3-methyladenine glycosylase 1 OS=Escherichia coli (strain K12) GN=tag PE=1 SV=1//6.46671e-46
Cla015324	5954.87	2079.33	1.518	8.0322e-13	2.557e-11	up	sp|Q9S9N9|CCR1_ARATH Cinnamoyl-CoA reductase 1 OS=Arabidopsis thaliana GN=CCR1 PE=1 SV=1//0
Cla015334	473.75	105.133	2.1719	8.0512e-13	2.5589e-11	up	-//-
Cla015337	7684.31	2975.68	1.3687	8.1167e-11	1.958e-09	up	sp|O04866|ARGD_ALNGL Acetylornithine aminotransferase, mitochondrial OS=Alnus glutinosa GN=AG118 PE=2 SV=1//0
Cla015349	1498.25	973.012	0.62275	0.0053027	0.021638	up	sp|F4JKH6|TSS_ARATH Protein TSS OS=Arabidopsis thaliana GN=TSS PE=1 SV=1//0
Cla015356	608.678	123.438	2.3019	1.044e-15	4.6128e-14	up	-//-
Cla015367	7495.99	4115.69	0.86499	7.2861e-05	0.00053677	up	-//-
Cla015368	266.838	104.945	1.3463	7.3709e-05	0.00054202	up	-//-
Cla015371	17102	7602.42	1.1696	1.609e-08	2.6153e-07	up	sp|Q41142|PLDA1_RICCO Phospholipase D alpha 1 OS=Ricinus communis GN=PLD1 PE=1 SV=1//0
Cla015373	1148.25	650.632	0.81952	0.00041427	0.0024203	up	sp|Q9R0P6|SC11A_MOUSE Signal peptidase complex catalytic subunit SEC11A OS=Mus musculus GN=Sec11a PE=2 SV=1//2.38791e-58
Cla015380	992.711	649.811	0.61135	0.0083137	0.031461	up	sp|Q9XI29|Y1540_ARATH Uncharacterized protein At1g15400 OS=Arabidopsis thaliana GN=At1g15400 PE=1 SV=2//1.33207e-22
Cla015384	1167.88	610.302	0.9363	9.0726e-05	0.00065012	up	-//-
Cla015407	328.754	38.5958	3.0905	1.2398e-06	1.3967e-05	up	sp|O24648|G3OX_PEA Gibberellin 3-beta-dioxygenase 1 OS=Pisum sativum GN=LE PE=1 SV=1//9.52729e-159
Cla015410	2288.64	1308.47	0.80661	0.0018053	0.0087195	up	sp|Q9SIE1|PAT_ARATH Bifunctional aspartate aminotransferase and glutamate/aspartate-prephenate aminotransferase OS=Arabidopsis thaliana GN=PAT PE=1 SV=2//3.64895e-41
Cla015413	10753	2988.16	1.8474	3.1308e-09	5.7187e-08	up	sp|Q944I4|GLYK_ARATH D-glycerate 3-kinase, chloroplastic OS=Arabidopsis thaliana GN=GLYK PE=1 SV=2//0
Cla015431	9731.98	6709.38	0.53655	0.011212	0.04002	up	sp|F4HQD4|HSP7P_ARATH Heat shock 70 kDa protein 15 OS=Arabidopsis thaliana GN=HSP70-15 PE=1 SV=1//0
Cla015434	202.764	74.8433	1.4379	0.00089096	0.0047321	up	-//-
Cla015451	397.073	172.6	1.202	5.8035e-05	0.00043974	up	sp|Q9CA89|ROGFC_ARATH Rop guanine nucleotide exchange factor 12 OS=Arabidopsis thaliana GN=ROPGEF12 PE=1 SV=1//0
Cla015452	3124.55	1242.05	1.3309	1.5035e-09	2.9032e-08	up	sp|P16180|RR17_ARATH 30S ribosomal protein S17, chloroplastic OS=Arabidopsis thaliana GN=RPS17 PE=1 SV=1//7.01582e-42
Cla015454	3694.83	1576.57	1.2287	1.4338e-08	2.3536e-07	up	sp|Q6K7S7|CCMH_ORYSJ Cytochrome c-type biogenesis CcmH-like mitochondrial protein OS=Oryza sativa subsp. japonica GN=CCMH PE=2 SV=1//1.2358e-81
Cla015464	201.662	42.1833	2.2572	3.3e-08	5.1098e-07	up	sp|Q9LU21|PNSB3_ARATH Photosynthetic NDH subunit of subcomplex B 3, chloroplastic OS=Arabidopsis thaliana GN=PNSB3 PE=2 SV=1//1.74586e-79
Cla015483	917.933	603.55	0.60491	0.011173	0.039923	up	-//-
Cla015484	547.478	297.776	0.87857	0.001036	0.0053932	up	-//-
Cla015490	2263.46	1520.8	0.5737	0.0087037	0.032597	up	sp|Q8H1G3|MTPC4_ARATH Metal tolerance protein C4 OS=Arabidopsis thaliana GN=MTPC4 PE=2 SV=1//0
Cla015506	3784.46	2052.64	0.88261	4.2665e-05	0.00033513	up	sp|Q9LDV4|ALAT2_ARATH Alanine aminotransferase 2, mitochondrial OS=Arabidopsis thaliana GN=ALAAT2 PE=2 SV=1//0
Cla015512	603.877	296.955	1.024	0.0017092	0.0083055	up	-//-
Cla015517	267.92	106.599	1.3296	0.0056293	0.022755	up	sp|Q9SYF0|GLIP2_ARATH GDSL esterase/lipase 2 OS=Arabidopsis thaliana GN=GLIP2 PE=2 SV=1//5.75357e-120
Cla015527	704.29	266.006	1.4047	1.2545e-07	1.7241e-06	up	sp|Q9LJX0|AB19B_ARATH ABC transporter B family member 19 OS=Arabidopsis thaliana GN=ABCB19 PE=1 SV=1//0
Cla015537	4724.82	2333.7	1.0176	1.7203e-06	1.8836e-05	up	sp|O48551|PSA6_SOYBN Proteasome subunit alpha type-6 OS=Glycine max GN=PAA1 PE=2 SV=2//2.21408e-152
Cla015552	649.886	142.157	2.1927	3.6394e-15	1.5047e-13	up	-//-
Cla015553	8853.53	6050.85	0.54912	0.007303	0.028292	up	sp|Q9FJA6|RS33_ARATH 40S ribosomal protein S3-3 OS=Arabidopsis thaliana GN=RPS3C PE=1 SV=1//3.06869e-151
Cla015570	443.468	128.264	1.7897	2.4981e-09	4.6482e-08	up	-//-
Cla015571	6431.87	1761.79	1.8682	2.1885e-18	1.2641e-16	up	sp|Q9LNQ4|ALA4_ARATH Probable phospholipid-transporting ATPase 4 OS=Arabidopsis thaliana GN=ALA4 PE=3 SV=2//0
Cla015597	2383.37	1124.98	1.0831	9.5302e-07	1.0985e-05	up	sp|Q949Y0|UBP6_ARATH Ubiquitin carboxyl-terminal hydrolase 6 OS=Arabidopsis thaliana GN=UBP6 PE=1 SV=1//4.31562e-97
Cla015598	2145.81	1212.4	0.82365	0.00017522	0.0011526	up	sp|Q84WC6|UBP7_ARATH Ubiquitin carboxyl-terminal hydrolase 7 OS=Arabidopsis thaliana GN=UBP7 PE=1 SV=1//5.15025e-130
Cla015603	7430.84	4546.29	0.70883	0.00052758	0.0029902	up	sp|Q8LE58|CHM1A_ARATH ESCRT-related protein CHMP1A OS=Arabidopsis thaliana GN=CHMP1A PE=1 SV=1//1.75657e-119
Cla015604	735.26	415.304	0.82409	0.0011359	0.0058384	up	-//-
Cla015616	15.1079	0.304475	5.6328	0.01027	0.037198	up	-//-
Cla015620	623.59	258.603	1.2699	2.0852e-06	2.2461e-05	up	-//-
Cla015621	119.25	18.0192	2.7264	2.4416e-07	3.1698e-06	up	-//-
Cla015622	624.782	320.318	0.96385	0.00028814	0.001771	up	-//-
Cla015625	314.457	57.018	2.4634	3.1441e-12	9.2687e-11	up	sp|Q9FGK4|B561J_ARATH Cytochrome b561 and DOMON domain-containing protein At5g47530 OS=Arabidopsis thaliana GN=At5g47530 PE=2 SV=1//8.58185e-138
Cla015632	446.008	206.237	1.1128	0.00010978	0.00076715	up	sp|Q9P7W0|OPA3_SCHPO OPA3-like protein OS=Schizosaccharomyces pombe (strain 972 / ATCC 24843) GN=SPBC1703.11 PE=3 SV=1//6.16091e-22
Cla015641	7461.21	4801.2	0.63602	0.0020124	0.0095826	up	sp|Q9SIV2|PSD2A_ARATH 26S proteasome non-ATPase regulatory subunit 2 homolog A OS=Arabidopsis thaliana GN=RPN1A PE=1 SV=2//0
Cla015644	6906.69	4097.08	0.7534	0.00025062	0.001572	up	sp|O49453|Y4844_ARATH Uncharacterized protein At4g28440 OS=Arabidopsis thaliana GN=At4g28440 PE=1 SV=1//1.54409e-48
Cla015647	635.601	355.142	0.83972	0.0012145	0.0061981	up	sp|Q9MAU3|TAF6_ARATH Transcription initiation factor TFIID subunit 6 OS=Arabidopsis thaliana GN=TAF6 PE=1 SV=1//0
Cla015653	12368	2949.88	2.0679	0.0036888	0.015963	up	-//-
Cla015654	5396.22	759.342	2.8291	9.9258e-10	2.0002e-08	up	sp|Q9FKI0|FIMB5_ARATH Fimbrin-5 OS=Arabidopsis thaliana GN=FIM5 PE=1 SV=1//0
Cla015666	2646.03	1769.21	0.58073	0.0068873	0.027002	up	sp|F4IFC5|SYTM2_ARATH Threonine--tRNA ligase, chloroplastic/mitochondrial 2 OS=Arabidopsis thaliana GN=EMB2761 PE=2 SV=1//0
Cla015680	33053.6	3320.09	3.3155	8.9463e-23	7.8886e-21	up	sp|P27518|CB21_GOSHI Chlorophyll a-b binding protein 151, chloroplastic OS=Gossypium hirsutum GN=CAB-151 PE=2 SV=2//2.18224e-178
Cla015699	2540.59	482.488	2.3966	5.7203e-25	6.0635e-23	up	sp|P49572|TRPC_ARATH Indole-3-glycerol phosphate synthase, chloroplastic OS=Arabidopsis thaliana GN=At2g04400 PE=2 SV=2//6.39798e-173
Cla015700	1590.07	1080.78	0.55702	0.010636	0.038335	up	sp|P94026|RBCMT_TOBAC Ribulose-1,5 bisphosphate carboxylase/oxygenase large subunit N-methyltransferase, chloroplastic OS=Nicotiana tabacum GN=RBCMT PE=2 SV=1//9.10397e-20
Cla015710	10844.6	3920.36	1.4679	1.954e-12	5.8998e-11	up	sp|P52417|GLGS2_VICFA Glucose-1-phosphate adenylyltransferase small subunit 2, chloroplastic OS=Vicia faba GN=AGPP PE=2 SV=1//0
Cla015713	2835.65	1368.33	1.0513	1.1334e-06	1.2907e-05	up	sp|O22446|HDA19_ARATH Histone deacetylase 19 OS=Arabidopsis thaliana GN=HDA19 PE=1 SV=2//0
Cla015714	604.559	79.0233	2.9355	2.3506e-08	3.7206e-07	up	sp|P93025|PHOT2_ARATH Phototropin-2 OS=Arabidopsis thaliana GN=PHOT2 PE=1 SV=2//0
Cla015715	1476	909.989	0.69777	0.0022427	0.010516	up	sp|O23685|AP1S2_ARATH AP-1 complex subunit sigma-2 OS=Arabidopsis thaliana GN=AAP19-2 PE=2 SV=1//5.57025e-110
Cla015720	400.719	153.55	1.3839	0.0005719	0.0032077	up	-//-
Cla015723	42.881	2.30556	4.2171	4.2061e-05	0.00033091	up	sp|O64966|HMDH1_GOSHI 3-hydroxy-3-methylglutaryl-coenzyme A reductase 1 OS=Gossypium hirsutum GN=HMG1 PE=3 SV=1//0
Cla015725	3931.62	1934.85	1.0229	1.695e-06	1.858e-05	up	sp|Q9FEA2|SYEM_ARATH Glutamate--tRNA ligase, chloroplastic/mitochondrial OS=Arabidopsis thaliana GN=OVA3 PE=2 SV=1//0
Cla015733	3290.76	1562.84	1.0743	7.7321e-07	9.0905e-06	up	-//-
Cla015748	856.247	496.971	0.78487	0.001619	0.0079313	up	sp|Q0WQD2|GAUT3_ARATH Probable galacturonosyltransferase 3 OS=Arabidopsis thaliana GN=GAUT3 PE=2 SV=2//0
Cla015774	25062.2	5768.75	2.1192	7.3526e-06	6.8922e-05	up	sp|Q9LZT4|EXLA1_ARATH Expansin-like A1 OS=Arabidopsis thaliana GN=EXLA1 PE=2 SV=1//1.65577e-74
Cla015785	6545.2	3677.76	0.83161	0.00016318	0.0010851	up	sp|O22265|SR43C_ARATH Signal recognition particle 43 kDa protein, chloroplastic OS=Arabidopsis thaliana GN=CAO PE=1 SV=2//3.71872e-128
Cla015797	6822.21	1706.54	1.9992	3.3378e-20	2.2936e-18	up	sp|Q39108|GGR_ARATH Heterodimeric geranylgeranyl pyrophosphate synthase small subunit, chloroplastic OS=Arabidopsis thaliana GN=GGR PE=1 SV=2//5.26329e-137
Cla015803	6111.14	3357.54	0.86404	3.6386e-05	0.00029156	up	sp|Q8N7N5|DCAF8_MOUSE DDB1- and CUL4-associated factor 8 OS=Mus musculus GN=Dcaf8 PE=1 SV=1//2.46115e-90
Cla015804	4244.62	1430.96	1.5687	7.1959e-13	2.3166e-11	up	sp|P42844|ZIM17_YEAST Mitochondrial protein import protein ZIM17 OS=Saccharomyces cerevisiae (strain ATCC 204508 / S288c) GN=ZIM17 PE=1 SV=2//1.78638e-08
Cla015805	2635.76	90.611	4.8624	1.7264e-73	2.0237e-70	up	sp|Q96MC6|HIAT1_HUMAN Hippocampus abundant transcript 1 protein OS=Homo sapiens GN=HIAT1 PE=2 SV=2//5.35049e-07
Cla015809	241.623	133.159	0.85961	0.0086447	0.032437	up	sp|G5DBJ0|CPP1_NICBE Protein CHAPERONE-LIKE PROTEIN OF POR1, chloroplastic OS=Nicotiana benthamiana GN=CPP1 PE=1 SV=1//7.53448e-07
Cla015823	655.224	12.213	5.7455	5.9154e-12	1.6769e-10	up	sp|P13443|DHGY_CUCSA Glycerate dehydrogenase OS=Cucumis sativus GN=HPR-A PE=2 SV=1//0
Cla015825	155.913	41.2949	1.9167	5.8636e-06	5.6327e-05	up	sp|Q9LDD1|BRG3_ARATH Probable BOI-related E3 ubiquitin-protein ligase 3 OS=Arabidopsis thaliana GN=BRG3 PE=1 SV=1//3.07215e-22
Cla015830	1045.74	322.443	1.6974	4.2969e-07	5.2792e-06	up	sp|Q94F47|UBC28_ARATH Ubiquitin-conjugating enzyme E2 28 OS=Arabidopsis thaliana GN=UBC28 PE=2 SV=1//1.63886e-104
Cla015833	7046.36	4375.84	0.68732	0.00079767	0.0042835	up	sp|Q42564|APX3_ARATH L-ascorbate peroxidase 3, peroxisomal OS=Arabidopsis thaliana GN=APX3 PE=1 SV=1//8.68454e-157
Cla015835	95441.9	126.585	9.5584	3.3096e-93	6.5954e-90	up	sp|F4I9E1|NFD4_ARATH Protein NUCLEAR FUSION DEFECTIVE 4 OS=Arabidopsis thaliana GN=NFD4 PE=3 SV=1//2.19079e-17
Cla015836	47395.1	42.7175	10.116	1.7956e-97	5.9639e-94	up	-//-
Cla015845	5077.42	3121.56	0.70183	0.00076793	0.0041394	up	-//-
Cla015849	1185.17	248.476	2.2539	2.8882e-07	3.6824e-06	up	-//-
Cla015880	460.809	264.686	0.79989	0.0062028	0.024702	up	-//-
Cla015881	2218.17	1005.44	1.1415	0.00026776	0.0016638	up	-//-
Cla015882	1115.94	641.945	0.79774	0.00070871	0.0038514	up	sp|Q92890|UFD1_HUMAN Ubiquitin fusion degradation protein 1 homolog OS=Homo sapiens GN=UFD1L PE=1 SV=3//5.60622e-76
Cla015886	56.0065	17.8786	1.6474	0.012266	0.043066	up	-//-
Cla015892	1048.05	522.348	1.0046	3.2987e-05	0.00026679	up	sp|P54454|YQEI_BACSU Probable RNA-binding protein YqeI OS=Bacillus subtilis (strain 168) GN=yqeI PE=3 SV=1//7.12627e-10
Cla015897	17501	5974.39	1.5506	1.7729e-06	1.9336e-05	up	-//-
Cla015901	319.094	15.4429	4.369	2.7613e-26	3.1088e-24	up	sp|P43296|RD19A_ARATH Cysteine proteinase RD19a OS=Arabidopsis thaliana GN=RD19A PE=2 SV=1//0
Cla015908	1860.72	812.348	1.1957	1.4556e-07	1.972e-06	up	sp|E1U332|ALL12_OLEEU Isoflavone reductase-like protein OS=Olea europaea PE=1 SV=1//1.33891e-126
Cla015963	68188.2	7176.21	3.2482	9.6439e-32	1.5625e-29	up	sp|Q94B35|ISPH_ARATH 4-hydroxy-3-methylbut-2-enyl diphosphate reductase, chloroplastic OS=Arabidopsis thaliana GN=ISPH PE=2 SV=1//0
Cla015967	131.31	5.03595	4.7046	1.4965e-11	3.9977e-10	up	-//-
Cla015970	20933	1439.41	3.8622	4.3451e-22	3.6079e-20	up	sp|P48417|CP74_LINUS Allene oxide synthase, chloroplastic OS=Linum usitatissimum GN=CYP74A PE=1 SV=1//2.69757e-176
Cla015971	603.526	179.196	1.7519	1.9485e-10	4.3532e-09	up	sp|A7SGU6|PSMG2_NEMVE Proteasome assembly chaperone 2 OS=Nematostella vectensis GN=psmg2 PE=3 SV=1//1.84468e-29
Cla015972	3334.65	1877.67	0.82859	0.0015741	0.0077417	up	sp|P90648|MHCKB_DICDI Myosin heavy chain kinase B OS=Dictyostelium discoideum GN=mhkB PE=2 SV=1//1.32063e-09
Cla015973	283.005	143.258	0.98221	0.0024815	0.01149	up	-//-
Cla015976	613.493	227.43	1.4316	7.295e-08	1.0489e-06	up	-//-
Cla015978	1249.99	241.884	2.3695	1.0755e-11	2.9442e-10	up	-//-
Cla015981	2360.44	1063.92	1.1497	3.6946e-07	4.6045e-06	up	sp|Q39224|SRG1_ARATH Protein SRG1 OS=Arabidopsis thaliana GN=SRG1 PE=2 SV=1//4.63785e-53
Cla015988	1127.72	723.962	0.63942	0.0059893	0.023977	up	-//-
Cla015991	1127.66	607.685	0.89194	0.00017275	0.0011388	up	sp|Q9LTH4|PCLL_ARATH Transcription factor BOA OS=Arabidopsis thaliana GN=BOA PE=2 SV=1//1.6856e-11
Cla015993	2869.96	1925.58	0.57574	0.0071159	0.027731	up	sp|Q9CSH3|RRP44_MOUSE Exosome complex exonuclease RRP44 OS=Mus musculus GN=Dis3 PE=2 SV=4//0
Cla016001	1615.82	899.888	0.84445	0.00016265	0.0010818	up	sp|Q9LJL3|PREP1_ARATH Presequence protease 1, chloroplastic/mitochondrial OS=Arabidopsis thaliana GN=PREP1 PE=1 SV=2//0
Cla016003	209.25	87.3591	1.2602	0.0006172	0.0034185	up	sp|Q9LJL3|PREP1_ARATH Presequence protease 1, chloroplastic/mitochondrial OS=Arabidopsis thaliana GN=PREP1 PE=1 SV=2//4.96383e-13
Cla016016	1813.54	1030.14	0.81596	0.000313	0.0018953	up	sp|Q9SEU7|TRXM3_ARATH Thioredoxin M3, chloroplastic OS=Arabidopsis thaliana GN=GAT1 PE=2 SV=2//2.71108e-55
Cla016026	77.8321	3.04475	4.676	1.1971e-09	2.3619e-08	up	sp|Q9AT54|SCGT_TOBAC Scopoletin glucosyltransferase OS=Nicotiana tabacum GN=TOGT1 PE=1 SV=1//0
Cla016032	5284.58	115.205	5.5195	3.1952e-22	2.698e-20	up	sp|Q9AT54|SCGT_TOBAC Scopoletin glucosyltransferase OS=Nicotiana tabacum GN=TOGT1 PE=1 SV=1//0
Cla016036	6336.49	4357.11	0.54031	0.0087014	0.032594	up	sp|P43297|RD21A_ARATH Cysteine proteinase RD21a OS=Arabidopsis thaliana GN=RD21A PE=1 SV=1//0
Cla016038	929.25	423.424	1.134	5.4803e-06	5.3144e-05	up	sp|Q0JBH9|ERG3_ORYSJ Elicitor-responsive protein 3 OS=Oryza sativa subsp. japonica GN=ERG3 PE=2 SV=1//6.23413e-12
Cla016041	1383.01	849.213	0.70361	0.0019771	0.0094302	up	-//-
Cla016048	261.239	106.252	1.2979	0.00010993	0.00076784	up	sp|Q2KNL5|CADH1_OCIBA Cinnamyl alcohol dehydrogenase 1 OS=Ocimum basilicum GN=CAD1 PE=1 SV=1//0
Cla016051	36.346	1.00054	5.1829	7.4875e-06	7.002e-05	up	sp|Q9MB73|LGT_CITUN Limonoid UDP-glucosyltransferase OS=Citrus unshiu PE=2 SV=1//0
Cla016053	7304.37	32.1006	7.83	4.0192e-30	5.9773e-28	up	sp|Q9MB73|LGT_CITUN Limonoid UDP-glucosyltransferase OS=Citrus unshiu PE=2 SV=1//0
Cla016056	78.101	4.11164	4.2476	0.0052561	0.021477	up	sp|Q9MB73|LGT_CITUN Limonoid UDP-glucosyltransferase OS=Citrus unshiu PE=2 SV=1//0
Cla016058	3808.94	157.09	4.5997	1.0484e-09	2.1062e-08	up	sp|Q9MB73|LGT_CITUN Limonoid UDP-glucosyltransferase OS=Citrus unshiu PE=2 SV=1//0
Cla016059	1815.16	1058.6	0.77794	0.00044741	0.0025873	up	sp|Q71DJ5|LIP1_ARATH Triacylglycerol lipase 1 OS=Arabidopsis thaliana GN=LIP1 PE=1 SV=1//4.36317e-151
Cla016079	467.579	191.698	1.2864	6.9434e-06	6.5422e-05	up	sp|P25339|PUF4_YEAST Pumilio homology domain family member 4 OS=Saccharomyces cerevisiae (strain ATCC 204508 / S288c) GN=PUF4 PE=1 SV=2//4.69414e-06
Cla016086	3839.34	2533.82	0.59955	0.0042345	0.017912	up	sp|Q5I7K3|RS29_WHEAT 40S ribosomal protein S29 OS=Triticum aestivum GN=RPS29 PE=1 SV=1//1.88947e-33
Cla016087	564.76	246.509	1.196	0.0014074	0.0070291	up	sp|Q94AI1|QWRF2_ARATH QWRF motif-containing protein 2 OS=Arabidopsis thaliana GN=QWRF2 PE=2 SV=1//4.34429e-152
Cla016089	12237	5192.76	1.2367	2.7356e-09	5.0524e-08	up	sp|Q9XJ35|CLPR1_ARATH ATP-dependent Clp protease proteolytic subunit-related protein 1, chloroplastic OS=Arabidopsis thaliana GN=CLPR1 PE=1 SV=1//2.17182e-179
Cla016115	6381.63	3435.72	0.89331	1.8646e-05	0.00015955	up	sp|Q94AR8|LEUC_ARATH 3-isopropylmalate dehydratase large subunit OS=Arabidopsis thaliana GN=IIL1 PE=1 SV=1//0
Cla016120	9118.87	5214.34	0.80637	7.9678e-05	0.00057951	up	sp|Q709C8|VP13C_HUMAN Vacuolar protein sorting-associated protein 13C OS=Homo sapiens GN=VPS13C PE=1 SV=1//9.53652e-12
Cla016124	196.444	104.534	0.91015	0.010777	0.038755	up	sp|Q96RL7|VP13A_HUMAN Vacuolar protein sorting-associated protein 13A OS=Homo sapiens GN=VPS13A PE=1 SV=2//3.57558e-07
Cla016137	2526.04	1643.09	0.62047	0.0048988	0.020262	up	sp|O80501|RAH1B_ARATH Ras-related protein RABH1b OS=Arabidopsis thaliana GN=RABH1B PE=1 SV=1//2.12056e-143
Cla016143	1635.98	968.145	0.75686	0.00087224	0.0046501	up	-//-
Cla016147	30.3195	2.08821	3.8599	0.00042541	0.0024788	up	-//-
Cla016148	969.869	48.6015	4.3187	1.1538e-24	1.1852e-22	up	sp|Q6LA43|APRR2_ARATH Two-component response regulator-like APRR2 OS=Arabidopsis thaliana GN=APRR2 PE=2 SV=2//6.07724e-87
Cla016167	2848.41	1526.05	0.90035	3.1369e-05	0.00025505	up	sp|Q9LQK7|AB7I_ARATH Protein ABCI7, chloroplastic OS=Arabidopsis thaliana GN=ABCI7 PE=1 SV=1//0
Cla016174	330.529	96.627	1.7743	6.2007e-08	9.1194e-07	up	sp|Q8S7M7|PIRL5_ORYSJ Plant intracellular Ras-group-related LRR protein 5 OS=Oryza sativa subsp. japonica GN=IRL5 PE=2 SV=1//6.57075e-174
Cla016176	1968.07	800.199	1.2984	8.4608e-09	1.446e-07	up	sp|P0A3C8|FER1_NOSSO Ferredoxin-1 OS=Nostoc sp. (strain ATCC 29151 / PCC 7119) GN=petF PE=1 SV=2//1.17691e-07
Cla016190	1050.2	281.59	1.899	4.2314e-07	5.2084e-06	up	sp|Q940I0|AHL13_ARATH AT-hook motif nuclear-localized protein 13 OS=Arabidopsis thaliana GN=AHL13 PE=1 SV=1//9.33196e-50
Cla016197	707.447	396.581	0.835	0.00094435	0.0049681	up	-//-
Cla016204	422.067	2.74027	7.267	9.5036e-36	1.9935e-33	up	-//-
Cla016219	315.305	183.785	0.77873	0.014374	0.04909	up	-//-
Cla016227	13843.1	3522.76	1.9744	9.8764e-14	3.4651e-12	up	sp|Q8L586|Y4958_ARATH Uncharacterized membrane protein At4g09580 OS=Arabidopsis thaliana GN=At4g09580 PE=1 SV=1//1.17752e-113
Cla016238	1313.05	774.591	0.76142	0.00080147	0.0043016	up	sp|Q336N8|JM706_ORYSJ Lysine-specific demethylase JMJ706 OS=Oryza sativa subsp. japonica GN=JMJ706 PE=2 SV=1//0
Cla016243	1463.75	573.349	1.3522	7.257e-09	1.2554e-07	up	sp|Q9FVR6|Y1222_ARATH Uncharacterized protein At1g32220, chloroplastic OS=Arabidopsis thaliana GN=At1g32220 PE=2 SV=1//5.57052e-107
Cla016246	714.224	410.556	0.7988	0.0014216	0.0070842	up	-//-
Cla016252	603.979	312.317	0.95149	0.00039543	0.0023266	up	sp|Q9C6T2|PPR68_ARATH Pentatricopeptide repeat-containing protein At1g31920 OS=Arabidopsis thaliana GN=PCMP-H11 PE=2 SV=1//0
Cla016264	22487	11203.6	1.0051	8.8244e-07	1.0242e-05	up	sp|Q05758|ILV5_ARATH Ketol-acid reductoisomerase, chloroplastic OS=Arabidopsis thaliana GN=At3g58610 PE=2 SV=2//0
Cla016268	108.784	25.9379	2.0683	3.7385e-05	0.00029896	up	sp|O49523|DSEL_ARATH Phospholipase A1-IIgamma OS=Arabidopsis thaliana GN=DSEL PE=1 SV=1//1.19676e-172
Cla016269	4628.29	1182.06	1.9692	3.7132e-19	2.327e-17	up	-//-
Cla016270	1297.73	544.355	1.2534	1.6539e-07	2.2149e-06	up	sp|P43935|Y077_HAEIN Uncharacterized protein HI_0077 OS=Haemophilus influenzae (strain ATCC 51907 / DSM 11121 / KW20 / Rd) GN=HI_0077 PE=4 SV=1//2.13925e-35
Cla016289	556.186	333.06	0.73979	0.0045761	0.01914	up	sp|Q6YSJ5|AGO16_ORYSJ Protein argonaute 16 OS=Oryza sativa subsp. japonica GN=AGO16 PE=2 SV=2//0
Cla016304	1697.51	367.427	2.2079	2.8401e-20	1.9652e-18	up	-//-
Cla016316	4627.33	2854.25	0.69707	0.00095111	0.0049983	up	sp|Q9FLQ4|ODO2A_ARATH Dihydrolipoyllysine-residue succinyltransferase component of 2-oxoglutarate dehydrogenase complex 1, mitochondrial OS=Arabidopsis thaliana GN=At5g55070 PE=2 SV=1//1.70754e-170
Cla016328	1017.05	545.342	0.89916	0.00017121	0.0011305	up	sp|Q8LB01|DAPB2_ARATH 4-hydroxy-tetrahydrodipicolinate reductase 2, chloroplastic OS=Arabidopsis thaliana GN=DAPB2 PE=2 SV=1//0
Cla016331	1551.88	1020.02	0.60542	0.0080973	0.030806	up	sp|Q9XIC5|NAC17_ARATH NAC domain-containing protein 17 OS=Arabidopsis thaliana GN=NAC017 PE=2 SV=1//7.84484e-123
Cla016345	1424.42	702.186	1.0204	6.9803e-05	0.00051749	up	sp|Q9MAP5|SBT33_ARATH Subtilisin-like protease SBT3.3 OS=Arabidopsis thaliana GN=SBT3.3 PE=2 SV=1//1.02874e-07
Cla016347	1172.81	565.644	1.052	9.6326e-06	8.7725e-05	up	sp|P51412|RK21_ARATH 50S ribosomal protein L21, chloroplastic OS=Arabidopsis thaliana GN=RPL21 PE=2 SV=1//8.88833e-51
Cla016358	16338.1	2418.32	2.7562	5.5243e-36	1.1712e-33	up	sp|P14614|GLUB4_ORYSJ Glutelin type-B 4 OS=Oryza sativa subsp. japonica GN=GLUB4 PE=1 SV=1//3.04878e-32
Cla016360	11889.9	2961.93	2.0051	4.597e-21	3.47e-19	up	sp|P35135|UBC4_SOLLC Ubiquitin-conjugating enzyme E2-17 kDa OS=Solanum lycopersicum PE=2 SV=1//9.73094e-100
Cla016366	1307.16	355.878	1.877	2.2176e-14	8.2913e-13	up	sp|Q9C8P0|ODP25_ARATH Dihydrolipoyllysine-residue acetyltransferase component 5 of pyruvate dehydrogenase complex, chloroplastic OS=Arabidopsis thaliana GN=EMB3003 PE=2 SV=1//0
Cla016382	177747	50267.4	1.8221	6.9032e-08	9.9883e-07	up	sp|Q9MAP7|SBT35_ARATH Subtilisin-like protease SBT3.5 OS=Arabidopsis thaliana GN=SBT3.5 PE=1 SV=1//8.80877e-09
Cla016383	34.0781	0	Inf	3.391e-07	4.2528e-06	up	sp|Q9MAP5|SBT33_ARATH Subtilisin-like protease SBT3.3 OS=Arabidopsis thaliana GN=SBT3.3 PE=2 SV=1//7.30624e-07
Cla016384	2056.64	1251.74	0.71635	0.00087381	0.004656	up	sp|Q9MAP5|SBT33_ARATH Subtilisin-like protease SBT3.3 OS=Arabidopsis thaliana GN=SBT3.3 PE=2 SV=1//7.16613e-09
Cla016385	7379.44	1376.04	2.423	5.8973e-17	3.0289e-15	up	sp|Q5VRY0|RH39_ORYSJ DEAD-box ATP-dependent RNA helicase 39 OS=Oryza sativa subsp. japonica GN=Os01g0184500 PE=2 SV=1//0
Cla016391	70.6671	21.9149	1.6891	0.0029413	0.013267	up	-//-
Cla016395	2236.06	1464.88	0.61018	0.0048613	0.020132	up	-//-
Cla016400	2180.64	1277.21	0.77175	0.00049951	0.0028497	up	sp|Q43582|LSM4_TOBAC Probable U6 snRNA-associated Sm-like protein LSm4 OS=Nicotiana tabacum PE=2 SV=1//2.50347e-55
Cla016404	3160.68	1882.1	0.74789	0.0005787	0.0032373	up	sp|Q67XD9|CINV2_ARATH Alkaline/neutral invertase CINV2 OS=Arabidopsis thaliana GN=CINV2 PE=1 SV=1//0
Cla016431	1199.25	724.215	0.72764	0.001922	0.0092026	up	sp|Q921L5|COG2_MOUSE Conserved oligomeric Golgi complex subunit 2 OS=Mus musculus GN=Cog2 PE=2 SV=2//1.1234e-58
Cla016434	1844.53	1246.04	0.5659	0.011794	0.041777	up	sp|F4KEW8|NET4A_ARATH Protein NETWORKED 4A OS=Arabidopsis thaliana GN=NET4A PE=2 SV=1//3.88713e-20
Cla016436	193.767	78.2246	1.3086	0.00055865	0.003144	up	sp|P85801|TRXH_POPJC Thioredoxin H-type OS=Populus jackii PE=1 SV=1//1.26246e-46
Cla016440	3450.39	1626.64	1.0849	5.4144e-07	6.5393e-06	up	sp|A7RK30|QORL2_NEMVE Quinone oxidoreductase-like protein 2 homolog OS=Nematostella vectensis GN=v1g238856 PE=3 SV=1//3.93416e-49
Cla016442	1179.04	547.7	1.1062	3.5253e-06	3.599e-05	up	-//-
Cla016443	2052.14	910.805	1.1719	1.8182e-07	2.4268e-06	up	sp|Q9C942|CSE_ARATH Caffeoylshikimate esterase OS=Arabidopsis thaliana GN=CSE PE=1 SV=1//3.71466e-18
Cla016453	6440.9	3205.19	1.0068	1.4375e-06	1.6004e-05	up	sp|Q93ZC5|AOC4_ARATH Allene oxide cyclase 4, chloroplastic OS=Arabidopsis thaliana GN=AOC4 PE=2 SV=1//3.37813e-73
Cla016455	737.705	282.682	1.3839	9.5136e-08	1.3364e-06	up	sp|Q55403|Y575_SYNY3 Thylakoid membrane protein slr0575 OS=Synechocystis sp. (strain PCC 6803 / Kazusa) GN=slr0575 PE=4 SV=1//1.61691e-26
Cla016458	2505.17	1092.44	1.1974	5.4535e-08	8.1187e-07	up	sp|Q0DWQ7|CCB12_ORYSJ Cyclin-B1-2 OS=Oryza sativa subsp. japonica GN=CYCB1-2 PE=3 SV=1//1.18291e-28
Cla016464	1531.99	692.634	1.1452	4.3504e-06	4.3132e-05	up	sp|Q9FFW5|PERK8_ARATH Proline-rich receptor-like protein kinase PERK8 OS=Arabidopsis thaliana GN=PERK8 PE=1 SV=1//0
Cla016470	1683.65	464.224	1.8587	3.296e-15	1.3684e-13	up	sp|O67409|TRPB2_AQUAE Tryptophan synthase beta chain 2 OS=Aquifex aeolicus (strain VF5) GN=trpB2 PE=3 SV=1//0
Cla016471	137.514	32.7021	2.0721	6.2591e-06	5.968e-05	up	sp|O67409|TRPB2_AQUAE Tryptophan synthase beta chain 2 OS=Aquifex aeolicus (strain VF5) GN=trpB2 PE=3 SV=1//0
Cla016506	15546.2	2434.39	2.6749	1.7431e-33	3.1868e-31	up	sp|Q69F95|C85A_PHAVU Cytochrome P450 85A OS=Phaseolus vulgaris GN=BA13 PE=3 SV=2//0
Cla016515	475.123	147.023	1.6923	8.6488e-09	1.4731e-07	up	sp|Q9FW03|MES11_ARATH Putative methylesterase 11, chloroplastic OS=Arabidopsis thaliana GN=MES11 PE=2 SV=1//2.1083e-152
Cla016534	883.19	144.128	2.6154	1.7705e-21	1.3947e-19	up	-//-
[truncated: 3,867 more rows]

## Sheet: O_34vsO_10.DEG
Gene_id	readcount_O_4	readcount_O_1	log2FoldChange	pval	padj	up_down	Blast swiss prot
Cla000011	414.83	158.407	1.3889	0.00013783	0.00069867	up	sp|P24465|C71A1_PERAE Cytochrome P450 71A1 OS=Persea americana GN=CYP71A1 PE=1 SV=2//8.25294e-64
Cla000027	600.787	297.848	1.0123	0.0024388	0.0087294	up	sp|Q9LTR2|TGD2_ARATH Protein TRIGALACTOSYLDIACYLGLYCEROL 2, chloroplastic OS=Arabidopsis thaliana GN=TGD2 PE=2 SV=1//2.21264e-63
Cla000040	5111.42	104.742	5.6088	0.00023134	0.0011072	up	sp|P19037|HS181_ARATH 18.1 kDa class I heat shock protein OS=Arabidopsis thaliana GN=HSP18.1 PE=2 SV=1//2.28337e-71
Cla000121	112.07	2.32863	5.5888	3.0843e-06	2.2359e-05	up	sp|Q9T072|BH025_ARATH Transcription factor bHLH25 OS=Arabidopsis thaliana GN=BHLH25 PE=2 SV=2//1.36029e-61
Cla000129	4325.52	937.24	2.2064	7.8725e-14	1.7442e-12	up	sp|Q6NPF9|TRXY1_ARATH Thioredoxin Y1, chloroplastic OS=Arabidopsis thaliana GN=At1g76760 PE=2 SV=1//3.86818e-50
Cla000142	5478.6	3031.34	0.85385	0.001739	0.0065245	up	sp|Q8GVE8|CAPP4_ARATH Phosphoenolpyruvate carboxylase 4 OS=Arabidopsis thaliana GN=PPC4 PE=2 SV=1//0
Cla000152	10641.9	3417.65	1.6387	0.0032684	0.011236	up	sp|Q949Q5|PSAO_ARATH Photosystem I subunit O OS=Arabidopsis thaliana GN=PSAO PE=1 SV=1//6.21964e-44
Cla000163	388.529	181.962	1.0944	0.0026597	0.0094092	up	sp|Q8LDR3|CYP23_ARATH Peptidyl-prolyl cis-trans isomerase CYP23 OS=Arabidopsis thaliana GN=CYP23 PE=2 SV=1//4.85414e-59
Cla000199	973.483	485.424	1.0039	0.0010612	0.0042697	up	sp|F4KFT7|TENAC_ARATH Probable aminopyrimidine aminohydrolase, mitochondrial OS=Arabidopsis thaliana GN=TNEA_C PE=2 SV=1//0
Cla000206	41.275	1.23073	5.0677	3.3018e-05	0.00019447	up	sp|Q8LFC0|IDH1_ARATH Isocitrate dehydrogenase [NAD] regulatory subunit 1, mitochondrial OS=Arabidopsis thaliana GN=IDH1 PE=2 SV=2//0
Cla000226	223.917	50.2567	2.1556	0.0045648	0.014972	up	sp|P24465|C71A1_PERAE Cytochrome P450 71A1 OS=Persea americana GN=CYP71A1 PE=1 SV=2//1.89748e-159
Cla000228	3666.99	15.7609	7.8621	7.5308e-07	6.1275e-06	up	sp|P24465|C71A1_PERAE Cytochrome P450 71A1 OS=Persea americana GN=CYP71A1 PE=1 SV=2//1.42306e-151
Cla000235	3549.67	1748.06	1.0219	0.00031505	0.0014518	up	sp|F4JKK0|SUD1_ARATH Probable E3 ubiquitin ligase SUD1 OS=Arabidopsis thaliana GN=SUD1 PE=1 SV=1//5.55138e-09
Cla000258	8691.41	4594.01	0.91984	0.00091141	0.0037367	up	sp|Q96558|UGDH1_SOYBN UDP-glucose 6-dehydrogenase 1 OS=Glycine max GN=UGD1 PE=2 SV=1//0
Cla000266	1596.38	872.18	0.8721	0.0029544	0.010315	up	sp|Q5XET4|PP142_ARATH Pentatricopeptide repeat-containing protein At2g01860 OS=Arabidopsis thaliana GN=EMB975 PE=2 SV=1//4.18303e-154
Cla000300	12152.9	4.85237	11.29	0.0030253	0.010519	up	sp|P09887|HS22C_SOYBN Small heat shock protein, chloroplastic (Fragment) OS=Glycine max GN=HSP22 PE=2 SV=1//6.32837e-70
Cla000307	3103.34	1476.44	1.0717	0.00016487	0.00082086	up	sp|Q9LYC2|NPL41_ARATH NPL4-like protein 1 OS=Arabidopsis thaliana GN=At3g63000 PE=1 SV=1//0
Cla000308	566.23	257.365	1.1376	0.00076342	0.0032037	up	sp|Q9LYC2|NPL41_ARATH NPL4-like protein 1 OS=Arabidopsis thaliana GN=At3g63000 PE=1 SV=1//3.5459e-24
Cla000311	11831.5	4966.56	1.2523	7.2916e-06	4.9099e-05	up	-//-
Cla000346	3194.32	111.66	4.8383	1.9786e-45	4.3643e-43	up	sp|Q93V61|LCAT3_ARATH Phospholipase A(1) LCAT3 OS=Arabidopsis thaliana GN=LCAT3 PE=1 SV=1//1.38473e-33
Cla000347	136.606	5.62918	4.601	5.8172e-12	1.0352e-10	up	-//-
Cla000348	3386.02	145.253	4.543	3.5917e-36	5.0771e-34	up	sp|Q93V61|LCAT3_ARATH Phospholipase A(1) LCAT3 OS=Arabidopsis thaliana GN=LCAT3 PE=1 SV=1//9.63208e-18
Cla000366	2777.27	1242.07	1.1609	5.2329e-05	0.00029547	up	sp|Q93YZ7|ILVH2_ARATH Acetolactate synthase small subunit 2, chloroplastic OS=Arabidopsis thaliana GN=At2g31810 PE=1 SV=1//1.08516e-39
Cla000376	18951.3	5805.94	1.7067	1.0981e-09	1.423e-08	up	-//-
Cla000388	427.21	159.035	1.4256	0.0066107	0.020538	up	sp|Q9LMX5|AFP2_ARATH Ninja-family protein AFP2 OS=Arabidopsis thaliana GN=AFP2 PE=1 SV=1//2.49044e-28
Cla000393	835.715	431.51	0.95362	0.0062685	0.019628	up	sp|Q9FZ86|PDCB3_ARATH PLASMODESMATA CALLOSE-BINDING PROTEIN 3 OS=Arabidopsis thaliana GN=PDCB3 PE=1 SV=1//8.46004e-31
Cla000394	2601.34	75.3238	5.11	1.5723e-27	1.2093e-25	up	sp|P49132|TPT_FLATR Triose phosphate/phosphate translocator, chloroplastic OS=Flaveria trinervia GN=TPT PE=2 SV=1//8.24869e-148
Cla000396	2080.33	217.344	3.2588	7.3199e-24	4.3471e-22	up	sp|Q9C5W6|14312_ARATH 14-3-3-like protein GF14 iota OS=Arabidopsis thaliana GN=GRF12 PE=2 SV=1//5.86654e-109
Cla000417	289.667	16.8571	4.103	1.8341e-12	3.5029e-11	up	sp|P93746|EC1_ARATH EC protein homolog 1 OS=Arabidopsis thaliana GN=At2g42000 PE=2 SV=2//3.86937e-18
Cla000424	612.253	309.216	0.98552	0.0031704	0.010953	up	sp|Q4LDF9|OEP37_PEA Outer envelope pore protein 37, chloroplastic OS=Pisum sativum GN=OEP37 PE=1 SV=1//6.54764e-151
Cla000429	1850.22	773.127	1.2589	2.2644e-05	0.00013774	up	sp|Q8LAC4|URH2_ARATH Probable uridine nucleosidase 2 OS=Arabidopsis thaliana GN=URH2 PE=2 SV=1//2.49495e-177
Cla000465	1953.54	521.543	1.9052	3.4834e-10	4.8931e-09	up	sp|Q02764|RK24_TOBAC 50S ribosomal protein L24, chloroplastic OS=Nicotiana tabacum GN=RPL24 PE=1 SV=1//3.50946e-83
Cla000490	1909.1	844.932	1.176	0.0029223	0.010223	up	-//-
Cla000513	1927.13	661.009	1.5437	2.3114e-07	2.063e-06	up	sp|P22686|CB2_CHLMO Chlorophyll a-b binding protein of LHCII type I, chloroplastic OS=Chlamydomonas moewusii PE=2 SV=1//5.5702e-61
Cla000518	1050.32	215.524	2.2849	5.9146e-10	7.9255e-09	up	-//-
Cla000539	1265.35	637.793	0.98837	0.00093792	0.003836	up	sp|F4ILY9|ANTL1_ARATH Amino acid transporter ANTL1 OS=Arabidopsis thaliana GN=At2g42005 PE=2 SV=1//0
Cla000546	1196.35	671.811	0.83251	0.0061681	0.019361	up	sp|Q6T486|RBRA_DICDI Probable E3 ubiquitin-protein ligase rbrA OS=Dictyostelium discoideum GN=rbrA PE=3 SV=1//7.75124e-17
Cla000547	424.192	147.104	1.5279	0.0028079	0.009878	up	sp|Q9SKC4|ARI10_ARATH Probable E3 ubiquitin-protein ligase ARI10 OS=Arabidopsis thaliana GN=ARI10 PE=2 SV=1//2.86217e-12
Cla000555	5886.36	2650.7	1.151	4.8948e-05	0.00027794	up	sp|Q7DLR9|PSB4_ARATH Proteasome subunit beta type-4 OS=Arabidopsis thaliana GN=PBG1 PE=1 SV=2//6.30436e-148
Cla000562	2853.34	1379.33	1.0487	0.0013503	0.0052415	up	sp|Q6NQE2|FQRL1_ARATH Probable NAD(P)H dehydrogenase (quinone) FQR1-like 1 OS=Arabidopsis thaliana GN=At4g27270 PE=2 SV=1//1.08259e-109
Cla000601	31.7693	0.289185	6.7795	4.2822e-05	0.00024637	up	-//-
Cla000612	15100.5	9578.61	0.6567	0.016106	0.043635	up	sp|P37830|G6PD_SOLTU Glucose-6-phosphate 1-dehydrogenase, cytoplasmic isoform OS=Solanum tuberosum GN=G6PDH PE=2 SV=1//0
Cla000633	32165.2	6391.01	2.3314	4.8648e-16	1.3773e-14	up	sp|P0CZ23|ACOX3_ARATH Acyl-coenzyme A oxidase 3, peroxisomal OS=Arabidopsis thaliana GN=ACX3 PE=1 SV=1//0
Cla000655	1777.02	751.457	1.2417	0.00021995	0.0010598	up	sp|Q93VK5|LUT5_ARATH Protein LUTEIN DEFICIENT 5, chloroplastic OS=Arabidopsis thaliana GN=CYP97A3 PE=1 SV=1//0
Cla000664	112722	10253.3	3.4586	0.0022553	0.008138	up	-//-
Cla000667	524.735	77.1553	2.7658	0.0034037	0.011641	up	sp|Q9SM43|VDE_SPIOL Violaxanthin de-epoxidase, chloroplastic OS=Spinacia oleracea GN=VDE1 PE=1 SV=2//7.97189e-128
Cla000686	2972.34	1702.94	0.80357	0.0047567	0.015503	up	-//-
Cla000691	7246.48	4110.81	0.81786	0.0034373	0.011734	up	sp|Q03489|AGL9_PETHY Agamous-like MADS-box protein AGL9 homolog OS=Petunia hybrida GN=FBP2 PE=1 SV=2//1.50402e-137
Cla000693	387.637	22.8493	4.0845	4.7953e-18	1.6232e-16	up	-//-
Cla000704	5657.59	2976.42	0.92661	0.00076116	0.0031964	up	sp|Q3EDL4|Y1154_ARATH Probable serine/threonine-protein kinase At1g01540 OS=Arabidopsis thaliana GN=At1g01540 PE=1 SV=2//0
Cla000712	12194.2	2171.29	2.4896	5.2036e-18	1.7555e-16	up	-//-
Cla000713	10657.1	652.424	4.0299	3.3394e-38	5.2368e-36	up	sp|P22335|HSF24_SOLPE Heat shock factor protein HSF24 OS=Solanum peruvianum GN=HSF24 PE=2 SV=1//3.69713e-98
Cla000718	4626.03	2044.42	1.1781	4.2376e-05	0.00024394	up	-//-
Cla000731	309.467	132.744	1.2211	0.001591	0.0060542	up	sp|Q8LGE9|CSTR1_ARATH CMP-sialic acid transporter 1 OS=Arabidopsis thaliana GN=At5g41760 PE=2 SV=1//2.91786e-157
Cla000735	922.897	237.074	1.9608	3.0753e-09	3.7097e-08	up	sp|Q9FFN2|GLYT3_ARATH Probable glycosyltransferase At5g03795 OS=Arabidopsis thaliana GN=At5g03795 PE=3 SV=2//3.75802e-33
Cla000771	1169.44	615.276	0.92651	0.0019945	0.0073284	up	sp|Q9ZR07|FRDA_ARATH Frataxin, mitochondrial OS=Arabidopsis thaliana GN=FH PE=1 SV=2//1.80723e-57
Cla000789	921.002	417.07	1.1429	0.00082349	0.0034216	up	sp|F4J469|TI22L_ARATH Protein TIC 22-like, chloroplastic OS=Arabidopsis thaliana GN=TIC22L PE=3 SV=1//1.99188e-45
Cla000797	3183.07	1917.13	0.73147	0.0085471	0.025504	up	sp|O49453|Y4844_ARATH Uncharacterized protein At4g28440 OS=Arabidopsis thaliana GN=At4g28440 PE=1 SV=1//2.00684e-59
Cla000798	4768.46	2676.44	0.83321	0.002734	0.0096383	up	sp|P51823|ARF2_ORYSJ ADP-ribosylation factor 2 OS=Oryza sativa subsp. japonica GN=ARF PE=2 SV=2//4.78468e-132
Cla000805	1587.58	526.07	1.5935	6.1086e-07	5.0523e-06	up	sp|F4IDI6|BRG2_ARATH Probable BOI-related E3 ubiquitin-protein ligase 2 OS=Arabidopsis thaliana GN=BRG2 PE=1 SV=1//8.92757e-25
Cla000809	1832.53	490.448	1.9017	4.8793e-10	6.6402e-09	up	sp|Q9SGY2|ACLA1_ARATH ATP-citrate synthase alpha chain protein 1 OS=Arabidopsis thaliana GN=ACLA-1 PE=1 SV=1//0
Cla000822	37.9771	0	Inf	0.00034083	0.0015563	up	-//-
Cla000840	8358.49	4658.09	0.8435	0.0019392	0.0071591	up	sp|Q8LB02|SDHB2_ARATH Succinate dehydrogenase [ubiquinone] iron-sulfur subunit 2, mitochondrial OS=Arabidopsis thaliana GN=SDH2-2 PE=1 SV=2//1.45587e-120
Cla000841	885.811	355.786	1.316	4.6735e-05	0.00026613	up	sp|Q8N5M1|ATPF2_HUMAN ATP synthase mitochondrial F1 complex assembly factor 2 OS=Homo sapiens GN=ATPAF2 PE=1 SV=1//1.06279e-11
Cla000848	1535.68	872.01	0.81646	0.0050911	0.016452	up	sp|O29470|Y788_ARCFU Uncharacterized transporter AF_0788 OS=Archaeoglobus fulgidus (strain ATCC 49558 / VC-16 / DSM 4304 / JCM 9628 / NBRC 100126) GN=AF_0788 PE=3 SV=1//8.0724e-09
Cla000850	2056.86	757.239	1.4416	1.5193e-06	1.1627e-05	up	sp|Q9S713|STT7_ARATH Serine/threonine-protein kinase STN7, chloroplastic OS=Arabidopsis thaliana GN=STN7 PE=1 SV=1//0
Cla000856	35.8569	4.62697	2.9541	0.0071929	0.022006	up	-//-
Cla000858	25233.2	6497.31	1.9574	2.058e-08	2.1719e-07	up	sp|Q02028|HSP7S_PEA Stromal 70 kDa heat shock-related protein, chloroplastic OS=Pisum sativum GN=HSP70 PE=2 SV=1//0
Cla000861	1655.73	459.853	1.8482	0.0011905	0.0047005	up	sp|Q0P5L0|RBM42_BOVIN RNA-binding protein 42 OS=Bos taurus GN=RBM42 PE=2 SV=1//1.19185e-49
Cla000874	21027.7	1096.78	4.2609	0.0018682	0.0069381	up	sp|Q9LF37|CLPB3_ARATH Chaperone protein ClpB3, chloroplastic OS=Arabidopsis thaliana GN=CLPB3 PE=2 SV=1//0
Cla000876	6081.99	3512.29	0.79213	0.0046668	0.015242	up	sp|Q9LJU7|PPA18_ARATH Purple acid phosphatase 18 OS=Arabidopsis thaliana GN=PAP18 PE=2 SV=1//0
Cla000878	839.982	370.634	1.1804	0.00021511	0.001038	up	sp|Q9LJU6|FAX6_ARATH Protein FATTY ACID EXPORT 6 OS=Arabidopsis thaliana GN=FAX6 PE=3 SV=1//3.89602e-29
Cla000905	2559.79	958.593	1.417	1.3768e-06	1.0627e-05	up	sp|Q9LIG0|Y3136_ARATH Clavaminate synthase-like protein At3g21360 OS=Arabidopsis thaliana GN=At3g21360 PE=1 SV=1//9.73341e-180
Cla000910	1060.39	546.487	0.95634	0.0069717	0.021444	up	sp|Q9LI74|CHUP1_ARATH Protein CHUP1, chloroplastic OS=Arabidopsis thaliana GN=CHUP1 PE=1 SV=1//2.1091e-47
Cla000965	238.156	0	Inf	0.0050362	0.016301	up	sp|O80742|PUB19_ARATH U-box domain-containing protein 19 OS=Arabidopsis thaliana GN=PUB19 PE=2 SV=1//2.9522e-166
Cla000974	611.787	232.332	1.3968	0.0093008	0.027433	up	sp|Q9FJJ3|SRO5_ARATH Probable inactive poly [ADP-ribose] polymerase SRO5 OS=Arabidopsis thaliana GN=SRO5 PE=1 SV=1//1.1222e-84
Cla000978	8850.75	4388.12	1.0122	0.00024819	0.0011787	up	sp|O49627|ISU1_ARATH Iron-sulfur cluster assembly protein 1 OS=Arabidopsis thaliana GN=ISU1 PE=2 SV=1//1.03924e-77
Cla000979	124923	7427.07	4.0721	2.7126e-40	4.4631e-38	up	sp|Q9M1P7|BOR2_ARATH Probable boron transporter 2 OS=Arabidopsis thaliana GN=BOR2 PE=2 SV=1//0
Cla000980	2249.14	1118.23	1.0082	0.001047	0.0042201	up	sp|P52178|TPT2_BRAOB Triose phosphate/phosphate translocator, non-green plastid, chloroplastic OS=Brassica oleracea var. botrytis GN=NGTPT PE=2 SV=1//6.326e-96
Cla000981	429.562	124.675	1.7847	2.4203e-06	1.79e-05	up	sp|Q2VZE7|APAG_MAGSA Protein ApaG OS=Magnetospirillum magneticum (strain AMB-1 / ATCC 700264) GN=apaG PE=3 SV=1//2.6803e-33
Cla000983	1139.49	424.73	1.4238	4.8649e-06	3.3883e-05	up	-//-
Cla000988	575.557	311.279	0.88675	0.0078147	0.023617	up	-//-
Cla000999	207.427	75.2301	1.4632	0.0010937	0.0043733	up	sp|O81864|FK171_ARATH Peptidyl-prolyl cis-trans isomerase FKBP17-1, chloroplastic OS=Arabidopsis thaliana GN=FKBP17-1 PE=2 SV=1//4.46279e-06
Cla001011	568.885	261.962	1.1188	0.00090744	0.0037234	up	sp|Q7SZN2|RN170_DANRE E3 ubiquitin-protein ligase RNF170 OS=Danio rerio GN=rnf170 PE=2 SV=1//7.54428e-10
Cla001020	555.854	198.698	1.4841	1.865e-05	0.00011516	up	sp|O49841|RAC2A_ARATH Ras-related protein RABC2a OS=Arabidopsis thaliana GN=RABC2A PE=1 SV=1//2.12956e-119
Cla001060	3429.07	425.166	3.0117	1.9409e-06	1.4559e-05	up	sp|P42749|UBC5_ARATH Ubiquitin-conjugating enzyme E2 5 OS=Arabidopsis thaliana GN=UBC5 PE=2 SV=2//9.6307e-77
Cla001062	555.199	279.289	0.99125	0.0032575	0.01121	up	sp|Q7X843|ATL48_ARATH RING-H2 finger protein ATL48 OS=Arabidopsis thaliana GN=ATL48 PE=1 SV=2//2.575e-42
Cla001075	1163.13	491.372	1.2431	6.2409e-05	0.00034549	up	sp|Q9FFF4|ILVH1_ARATH Acetolactate synthase small subunit 1, chloroplastic OS=Arabidopsis thaliana GN=VAT1 PE=1 SV=1//2.6464e-36
Cla001090	997.577	550.5	0.85768	0.0046229	0.015128	up	sp|Q3HVN1|AGUB_SOLTU N-carbamoylputrescine amidase OS=Solanum tuberosum GN=CPA PE=2 SV=1//1.02149e-40
Cla001094	1095.4	627.187	0.80449	0.0097836	0.028611	up	sp|Q9ZQH1|CML48_ARATH Probable calcium-binding protein CML48 OS=Arabidopsis thaliana GN=CML48 PE=2 SV=2//1.40481e-69
Cla001099	1869.47	1049.17	0.83339	0.0046023	0.015076	up	sp|Q9SZC9|HMA6_ARATH Copper-transporting ATPase PAA1, chloroplastic OS=Arabidopsis thaliana GN=PAA1 PE=2 SV=1//0
Cla001104	1298.12	371.746	1.804	9.1531e-09	1.0219e-07	up	-//-
Cla001115	1253.93	614.21	1.0297	0.00061431	0.0026513	up	sp|Q6AWX0|XYLL2_ARATH D-xylose-proton symporter-like 2 OS=Arabidopsis thaliana GN=At5g17010 PE=1 SV=1//1.71377e-86
Cla001141	42.4291	2.67838	3.9856	0.00026919	0.001265	up	-//-
Cla001155	3331.92	1184.63	1.4919	2.2687e-07	2.0267e-06	up	sp|Q8GYC7|PGL1B_ARATH PGR5-like protein 1B, chloroplastic OS=Arabidopsis thaliana GN=PGRL1B PE=1 SV=1//1.04089e-157
Cla001157	1380.21	442.632	1.6407	1.0785e-07	1.014e-06	up	sp|Q9LD47|CCS_ARATH Copper chaperone for superoxide dismutase, chloroplastic/cytosolic OS=Arabidopsis thaliana GN=CCS PE=1 SV=1//3.29427e-40
Cla001158	2196.6	687.095	1.6767	2.0501e-08	2.1657e-07	up	sp|Q7XTY9|CCS_ORYSJ Copper chaperone for superoxide dismutase, chloroplastic OS=Oryza sativa subsp. japonica GN=CCS PE=2 SV=1//5.41317e-55
Cla001165	1084.73	578.247	0.90757	0.0024723	0.0088335	up	sp|Q8VYY4|BASS6_ARATH Probable sodium/metabolite cotransporter BASS6, chloroplastic OS=Arabidopsis thaliana GN=BASS6 PE=2 SV=1//2.76252e-178
Cla001166	144.483	37.6083	1.9418	0.00019956	0.00097275	up	sp|Q55720|YC49L_SYNY3 Ycf49-like protein OS=Synechocystis sp. (strain PCC 6803 / Kazusa) GN=sll0608 PE=3 SV=1//6.27393e-24
Cla001189	2150.17	737.623	1.5435	2.818e-07	2.4788e-06	up	sp|Q949R4|DIOXL_ARATH Extradiol ring-cleavage dioxygenase OS=Arabidopsis thaliana GN=LIGB PE=2 SV=1//1.92398e-126
Cla001204	1047.86	142.939	2.874	9.2949e-07	7.4393e-06	up	sp|O64966|HMDH1_GOSHI 3-hydroxy-3-methylglutaryl-coenzyme A reductase 1 OS=Gossypium hirsutum GN=HMG1 PE=3 SV=1//0
Cla001207	2768.37	1359.98	1.0255	0.00030397	0.0014062	up	sp|Q99JW2|ACY1_MOUSE Aminoacylase-1 OS=Mus musculus GN=Acy1 PE=1 SV=1//6.00151e-120
Cla001226	6305.06	3793.51	0.73298	0.0064774	0.02019	up	sp|Q9FN69|GL3_ARATH Transcription factor GLABRA 3 OS=Arabidopsis thaliana GN=GL3 PE=1 SV=1//1.47785e-115
Cla001251	2376.6	899.357	1.4019	0.011114	0.03193	up	sp|O48651|ERG1_PANGI Squalene monooxygenase OS=Panax ginseng PE=2 SV=1//0
Cla001254	566.932	253.299	1.1623	0.0019293	0.0071267	up	sp|Q9LJM4|IKU2_ARATH Receptor-like protein kinase HAIKU2 OS=Arabidopsis thaliana GN=IKU2 PE=1 SV=1//0
Cla001259	6537.53	1574.47	2.0539	7.2745e-11	1.1241e-09	up	-//-
Cla001268	1396.18	0.578371	11.237	1.5633e-79	1.3644e-76	up	sp|P27879|HSP11_MEDSA 18.1 kDa class I heat shock protein (Fragment) OS=Medicago sativa GN=HSP18.1 PE=2 SV=1//3.35386e-42
Cla001315	21.3855	1.62418	3.7188	0.011662	0.033267	up	sp|Q681K7|GEX1_ARATH Protein GAMETE EXPRESSED 1 OS=Arabidopsis thaliana GN=GEX1 PE=1 SV=1//1.14831e-153
Cla001358	3962.33	2037.49	0.95956	0.00067126	0.002862	up	sp|Q53FA7|QORX_HUMAN Quinone oxidoreductase PIG3 OS=Homo sapiens GN=TP53I3 PE=1 SV=2//6.53386e-78
Cla001363	4068.15	2422.75	0.74773	0.0082569	0.024745	up	sp|Q9S9T7|VP282_ARATH Vacuolar protein sorting-associated protein 28 homolog 2 OS=Arabidopsis thaliana GN=VPS28-2 PE=1 SV=2//7.98742e-120
Cla001404	6068.04	1691.28	1.8431	2.2095e-10	3.1862e-09	up	sp|P24724|HSP90_THEPA Heat shock protein 90 OS=Theileria parva GN=TP02_0244 PE=2 SV=2//0
Cla001411	421.65	101.33	2.057	3.3302e-07	2.8976e-06	up	sp|O81263|KITH_ORYSJ Thymidine kinase OS=Oryza sativa subsp. japonica GN=TK PE=2 SV=2//2.26518e-99
Cla001414	927.876	475.661	0.964	0.0022089	0.007995	up	-//-
Cla001434	43.9039	2.18914	4.3259	0.0013819	0.0053476	up	sp|Q9SLN8|DBR_TOBAC 2-alkenal reductase (NADP(+)-dependent) OS=Nicotiana tabacum GN=DBR PE=1 SV=1//1.53791e-109
Cla001435	27.8292	0	Inf	4.1599e-05	0.00023995	up	sp|Q9SLN8|DBR_TOBAC 2-alkenal reductase (NADP(+)-dependent) OS=Nicotiana tabacum GN=DBR PE=1 SV=1//7.24075e-58
Cla001454	1483.26	564.859	1.3928	4.5358e-06	3.1796e-05	up	sp|B9HBA8|ACCC1_POPTR Biotin carboxylase 1, chloroplastic OS=Populus trichocarpa GN=POPTRDRAFT_831870 PE=2 SV=1//1.24399e-126
Cla001455	2344.42	785.344	1.5778	8.5478e-08	8.1356e-07	up	sp|B9HBA8|ACCC1_POPTR Biotin carboxylase 1, chloroplastic OS=Populus trichocarpa GN=POPTRDRAFT_831870 PE=2 SV=1//0
Cla001456	640.026	257.37	1.3143	8.1016e-05	0.00043869	up	sp|Q5ZJ08|SYYC_CHICK Tyrosine--tRNA ligase, cytoplasmic OS=Gallus gallus GN=YARS PE=2 SV=1//2.33961e-15
Cla001457	497.377	171.167	1.5389	1.947e-05	0.00011992	up	sp|Q29465|SYYC_BOVIN Tyrosine--tRNA ligase, cytoplasmic OS=Bos taurus GN=YARS PE=2 SV=4//6.67646e-12
Cla001461	677.418	342.435	0.98422	0.0025975	0.0092153	up	-//-
Cla001469	10543.2	3503.48	1.5895	7.2964e-08	7.0177e-07	up	sp|P53536|PHSL_VICFA Alpha-1,4 glucan phosphorylase L isozyme, chloroplastic/amyloplastic OS=Vicia faba GN=PHO1 PE=2 SV=2//3.10823e-141
Cla001480	6380.65	3083.54	1.0491	0.00017181	0.00085323	up	-//-
Cla001481	136.056	11.2466	3.5966	7.0291e-09	7.976e-08	up	sp|Q9LYU7|CRN_ARATH Inactive leucine-rich repeat receptor-like protein kinase CORYNE OS=Arabidopsis thaliana GN=CRN PE=1 SV=1//2.79454e-103
Cla001487	117.271	27.996	2.0665	0.0084413	0.025215	up	sp|Q93ZM9|TIF9_ARATH Protein TIFY 9 OS=Arabidopsis thaliana GN=TIFY9 PE=1 SV=1//2.05917e-42
Cla001488	833.284	437.543	0.92938	0.0029385	0.010269	up	-//-
Cla001489	1178.6	405.905	1.5379	7.7584e-07	6.2822e-06	up	-//-
Cla001493	13269.3	6738.45	0.97761	0.0003384	0.0015455	up	sp|Q0J0H4|ODPB2_ORYSJ Pyruvate dehydrogenase E1 component subunit beta-2, mitochondrial OS=Oryza sativa subsp. japonica GN=Os09g0509200 PE=2 SV=1//0
Cla001500	3187.95	850.109	1.9069	0.00025461	0.001204	up	sp|Q9SGU2|SAU71_ARATH Auxin-responsive protein SAUR71 OS=Arabidopsis thaliana GN=SAUR71 PE=2 SV=1//2.00116e-13
Cla001502	2064.11	804.854	1.3587	3.9599e-06	2.8137e-05	up	sp|Q9ASS6|PNSL5_ARATH Photosynthetic NDH subunit of lumenal location 5, chloroplastic OS=Arabidopsis thaliana GN=PNSL5 PE=1 SV=1//9.34071e-100
Cla001511	1391.81	748.734	0.89444	0.013415	0.037442	up	-//-
Cla001514	7191.82	2942.7	1.2892	5.538e-06	3.8132e-05	up	sp|Q9C509|SGPL_ARATH Sphingosine-1-phosphate lyase OS=Arabidopsis thaliana GN=DPL1 PE=1 SV=1//5.33616e-97
Cla001516	5461.12	2843.39	0.94158	0.0145	0.039954	up	-//-
Cla001518	345	115.021	1.5847	5.8963e-05	0.000329	up	sp|Q84WJ2|PRI2_ARATH Probable DNA primase large subunit OS=Arabidopsis thaliana GN=At1g67320 PE=2 SV=2//0
Cla001534	430.676	2.67666	7.33	0.00047947	0.0021241	up	sp|Q4PT23|WTR6_ARATH WAT1-related protein At1g25270 OS=Arabidopsis thaliana GN=At1g25270 PE=2 SV=1//4.07218e-72
Cla001571	462.485	254.19	0.8635	0.010991	0.03162	up	-//-
Cla001593	5066.49	3163.22	0.67959	0.014321	0.039526	up	sp|Q9LVE4|CSCL4_ARATH CSC1-like protein At3g21620 OS=Arabidopsis thaliana GN=At3g21620 PE=2 SV=1//0
Cla001606	18.1137	0	Inf	0.0013267	0.005162	up	-//-
Cla001621	3853.94	174.414	4.4657	0.0028009	0.0098548	up	sp|P09042|PR1C_TOBAC Pathogenesis-related protein 1C OS=Nicotiana tabacum PE=2 SV=3//2.24252e-68
Cla001623	200.559	0	Inf	3.4622e-11	5.5597e-10	up	sp|P33154|PR1_ARATH Pathogenesis-related protein 1 OS=Arabidopsis thaliana GN=At2g14610 PE=1 SV=1//1.01256e-69
Cla001664	10865.2	6514.51	0.73798	0.0062062	0.019456	up	sp|P48496|TPIC_SPIOL Triosephosphate isomerase, chloroplastic OS=Spinacia oleracea GN=TPIP1 PE=1 SV=1//3.03684e-135
Cla001666	3086.34	1261.32	1.291	5.4125e-06	3.7386e-05	up	-//-
Cla001683	817.416	411.133	0.99147	0.0015576	0.0059418	up	sp|Q5ZKV9|SYNDE_CHICK Syndetin OS=Gallus gallus GN=CCDC132 PE=2 SV=1//4.07776e-19
Cla001729	58.0847	12.2621	2.244	0.0041629	0.013837	up	sp|Q96MC6|HIAT1_HUMAN Hippocampus abundant transcript 1 protein OS=Homo sapiens GN=HIAT1 PE=2 SV=2//1.83676e-16
Cla001746	1570.9	271.677	2.5316	8.1205e-16	2.2391e-14	up	sp|Q9FFR9|CHX18_ARATH Cation/H(+) antiporter 18 OS=Arabidopsis thaliana GN=CHX18 PE=2 SV=1//0
Cla001747	178.781	0	Inf	1.0589e-10	1.5969e-09	up	-//-
Cla001766	1024.49	558.447	0.87542	0.0105	0.030358	up	-//-
Cla001775	512.778	292.573	0.80954	0.018105	0.048192	up	sp|Q9SZR0|CHMO_ARATH Choline monooxygenase, chloroplastic OS=Arabidopsis thaliana GN=At4g29890 PE=2 SV=2//0
Cla001778	8166.58	4252.76	0.94133	0.0008441	0.0034964	up	sp|P42824|DNJH2_ALLPO DnaJ protein homolog 2 OS=Allium porrum GN=LDJ2 PE=2 SV=1//3.0758e-147
Cla001779	481.27	151.735	1.6653	1.8789e-05	0.00011597	up	sp|P83332|TLP1_PRUPE Thaumatin-like protein 1 OS=Prunus persica PE=2 SV=1//2.07173e-53
Cla001790	15083.5	8039.52	0.90779	0.015404	0.042044	up	sp|Q40459|PSBO_TOBAC Oxygen-evolving enhancer protein 1, chloroplastic OS=Nicotiana tabacum GN=PSBO PE=2 SV=1//0
Cla001793	1221.35	663.967	0.8793	0.0034843	0.01187	up	sp|O23166|TR164_ARATH Thioredoxin-like protein HCF164, chloroplastic OS=Arabidopsis thaliana GN=HCF164 PE=2 SV=2//4.80417e-113
Cla001795	14.5244	0	Inf	0.0052301	0.016814	up	-//-
Cla001796	2111.89	430.807	2.2934	0.0048476	0.01575	up	-//-
Cla001798	2274.58	449.728	2.3385	0.0080664	0.024268	up	sp|Q54LN2|VP13D_DICDI Putative vacuolar protein sorting-associated protein 13D OS=Dictyostelium discoideum GN=vps13D PE=3 SV=1//1.89436e-06
Cla001799	1040.87	176.512	2.5599	0.0046131	0.015104	up	-//-
Cla001800	3729.7	626.747	2.5731	0.006003	0.018908	up	-//-
Cla001815	4139.53	5.37018	9.5903	1.9475e-06	1.4592e-05	up	sp|Q6RYA0|SABP2_TOBAC Salicylic acid-binding protein 2 OS=Nicotiana tabacum GN=SABP2 PE=1 SV=1//7.64595e-120
Cla001822	5127.3	2657.38	0.94819	0.00048862	0.0021585	up	sp|Q94DH3|PCL1_ORYSJ Transcription factor PCL1 OS=Oryza sativa subsp. japonica GN=PCL1 PE=2 SV=1//1.72153e-13
Cla001829	1935.05	922.857	1.0682	0.00025055	0.0011876	up	sp|A2VDJ0|T131L_HUMAN Transmembrane protein 131-like OS=Homo sapiens GN=KIAA0922 PE=1 SV=2//2.11549e-11
Cla001841	1434.34	805.187	0.83299	0.0046631	0.015232	up	-//-
Cla001847	2514.06	66.622	5.2379	4.8159e-09	5.6301e-08	up	sp|P22196|PER2_ARAHY Cationic peroxidase 2 OS=Arachis hypogaea GN=PNC2 PE=2 SV=1//5.1804e-140
Cla001856	120.597	48.3385	1.3189	0.012632	0.035608	up	sp|Q6PS57|CKS1_ORYSJ Cyclin-dependent kinases regulatory subunit 1 OS=Oryza sativa subsp. japonica GN=CKS1 PE=2 SV=1//4.63157e-49
Cla001857	8508.18	2254.4	1.9161	0.00038981	0.001758	up	sp|Q9FYC2|PAO_ARATH Pheophorbide a oxygenase, chloroplastic OS=Arabidopsis thaliana GN=PAO PE=1 SV=1//0
Cla001867	5971.51	3220.12	0.89098	0.0020743	0.0075781	up	-//-
Cla001883	219.183	109.985	0.99483	0.016362	0.044204	up	sp|Q8S949|NACK2_TOBAC Kinesin-like protein NACK2 OS=Nicotiana tabacum GN=NACK2 PE=1 SV=1//0
Cla001895	1274.27	206.464	2.6257	6.0792e-16	1.6995e-14	up	sp|Q9SY73|PTALR_ARATH NADPH-dependent pterin aldehyde reductase OS=Arabidopsis thaliana GN=At1g10310 PE=1 SV=1//2.09806e-80
Cla001903	5870.61	1713.25	1.7768	4.5618e-10	6.2761e-09	up	sp|O23710|PSB7A_ARATH Proteasome subunit beta type-7-A OS=Arabidopsis thaliana GN=PBB1 PE=1 SV=2//0
Cla001909	1663.99	1.15674	10.49	3.1068e-05	0.00018375	up	sp|Q9SY73|PTALR_ARATH NADPH-dependent pterin aldehyde reductase OS=Arabidopsis thaliana GN=At1g10310 PE=1 SV=1//1.35178e-90
Cla001910	1147.08	499.948	1.1981	0.00011876	0.00061266	up	sp|A3QJU3|ADCK4_DANRE AarF domain-containing protein kinase 4 OS=Danio rerio GN=adck4 PE=3 SV=2//9.91565e-127
Cla001925	533.59	265.849	1.0051	0.0030188	0.010503	up	sp|Q55681|RECG_SYNY3 ATP-dependent DNA helicase RecG OS=Synechocystis sp. (strain PCC 6803 / Kazusa) GN=recG PE=3 SV=1//9.21336e-71
Cla001938	4902.02	1597.48	1.6176	0.00023197	0.0011095	up	sp|O24496|GLO2C_ARATH Hydroxyacylglutathione hydrolase cytoplasmic OS=Arabidopsis thaliana GN=GLX2-2 PE=1 SV=2//1.95415e-82
Cla001944	876.322	386.353	1.1815	0.0032508	0.011194	up	sp|Q9ZU32|NADC_ARATH Nicotinate-nucleotide pyrophosphorylase [carboxylating], chloroplastic OS=Arabidopsis thaliana GN=QPT PE=2 SV=2//1.12666e-47
Cla001945	1307.6	566.948	1.2056	0.00065061	0.0027858	up	sp|Q9ZU32|NADC_ARATH Nicotinate-nucleotide pyrophosphorylase [carboxylating], chloroplastic OS=Arabidopsis thaliana GN=QPT PE=2 SV=2//3.13386e-91
Cla001976	2259.18	957.01	1.2392	1.8841e-05	0.00011626	up	-//-
Cla001988	363.346	0	Inf	3.3246e-07	2.894e-06	up	sp|P48979|PGLR_PRUPE Polygalacturonase OS=Prunus persica PE=2 SV=1//1.77659e-158
Cla001989	62.1045	3.33246	4.22	5.5191e-06	3.8031e-05	up	-//-
Cla002011	668.614	0	Inf	3.0566e-06	2.219e-05	up	sp|O81865|P2A01_ARATH Protein PHLOEM PROTEIN 2-LIKE A1 OS=Arabidopsis thaliana GN=PP2A1 PE=2 SV=1//8.67858e-11
Cla002039	59.5185	0	Inf	4.1323e-06	2.9238e-05	up	sp|Q9M374|CRF6_ARATH Ethylene-responsive transcription factor CRF6 OS=Arabidopsis thaliana GN=CRF6 PE=1 SV=1//2.47935e-34
Cla002075	913.573	69.4704	3.717	0.0061712	0.019365	up	sp|Q9SGP6|GRXC9_ARATH Glutaredoxin-C9 OS=Arabidopsis thaliana GN=GRXC9 PE=1 SV=1//2.03972e-41
Cla002084	2439.23	543.504	2.1661	7.3081e-13	1.4524e-11	up	sp|Q9FYA2|WRK75_ARATH Probable WRKY transcription factor 75 OS=Arabidopsis thaliana GN=WRKY75 PE=2 SV=1//5.94562e-52
Cla002091	10935.8	2580.69	2.0832	1.533e-13	3.2842e-12	up	sp|Q9LBG2|LVR_LEIAQ Levodione reductase OS=Leifsonia aquatica GN=lvr PE=1 SV=1//1.78029e-18
Cla002093	22.2895	0	Inf	0.0002984	0.001383	up	-//-
Cla002097	750.384	126.703	2.5662	2.7116e-13	5.6404e-12	up	-//-
Cla002098	6316.37	2419.29	1.3845	1.9234e-05	0.00011854	up	sp|Q6R3K6|YSL6_ARATH Probable metal-nicotianamine transporter YSL6 OS=Arabidopsis thaliana GN=YSL6 PE=2 SV=2//0
Cla002118	72.8839	22.8948	1.6706	0.012916	0.036245	up	sp|Q9SII7|PP159_ARATH Pentatricopeptide repeat-containing protein At2g17210 OS=Arabidopsis thaliana GN=PCMP-E77 PE=3 SV=2//0
Cla002152	627.176	365.099	0.78058	0.014195	0.03927	up	-//-
Cla002157	3244.1	1704.22	0.92871	0.0010071	0.0040821	up	sp|Q9LSD8|MUB4_ARATH Membrane-anchored ubiquitin-fold protein 4 OS=Arabidopsis thaliana GN=MUB4 PE=1 SV=1//8.82244e-55
Cla002178	2542.71	680.204	1.9023	1.7129e-10	2.5079e-09	up	sp|P29450|TRXF_PEA Thioredoxin F-type, chloroplastic OS=Pisum sativum PE=2 SV=1//1.95655e-68
Cla002179	2639.12	1441.28	0.87271	0.0020092	0.0073716	up	sp|O80800|ACPM2_ARATH Acyl carrier protein 2, mitochondrial OS=Arabidopsis thaliana GN=MTACP2 PE=1 SV=1//5.33121e-60
Cla002183	2002.72	1050.8	0.93047	0.0016301	0.0061794	up	sp|Q8BK64|AHSA1_MOUSE Activator of 90 kDa heat shock protein ATPase homolog 1 OS=Mus musculus GN=Ahsa1 PE=2 SV=2//1.02637e-06
Cla002202	1563.58	767.118	1.0273	0.00051881	0.0022763	up	sp|Q55512|DHAS_SYNY3 Aspartate-semialdehyde dehydrogenase OS=Synechocystis sp. (strain PCC 6803 / Kazusa) GN=asd PE=3 SV=2//2.48758e-116
Cla002206	1947.57	1090.77	0.83632	0.0050934	0.016456	up	sp|Q9LFD5|BPA1_ARATH Binding partner of ACD11 1 OS=Arabidopsis thaliana GN=BPA1 PE=1 SV=1//9.23281e-75
Cla002211	2132.13	1140.59	0.90251	0.0018081	0.0067487	up	sp|Q54IQ5|CCZ1_DICDI Vacuolar fusion protein CCZ1 homolog OS=Dictyostelium discoideum GN=DDB_G0288589 PE=3 SV=1//5.92358e-21
Cla002221	2220.01	1106.75	1.0042	0.00049327	0.0021766	up	sp|Q9C6S5|PHSB_ARATH Probable polyamine transporter At1g31830 OS=Arabidopsis thaliana GN=At1g31830 PE=2 SV=1//0
Cla002228	2221.94	1120.74	0.98737	0.00067719	0.0028836	up	sp|O22820|U74F1_ARATH UDP-glycosyltransferase 74F1 OS=Arabidopsis thaliana GN=UGT74F1 PE=1 SV=1//5.98528e-129
Cla002235	3849.98	860.454	2.1617	0.0021991	0.0079664	up	sp|Q9ZWA1|C3H2_ARATH Zinc finger CCCH domain-containing protein 2 OS=Arabidopsis thaliana GN=At1g03790 PE=2 SV=1//4.85882e-73
Cla002239	9998.78	2232.19	2.1633	4.0542e-14	9.3326e-13	up	sp|O80860|FTSH2_ARATH ATP-dependent zinc metalloprotease FTSH 2, chloroplastic OS=Arabidopsis thaliana GN=FTSH2 PE=1 SV=1//0
Cla002245	5107.13	90.2069	5.8231	1.3244e-61	5.6563e-59	up	sp|P39101|CAJ1_YEAST Protein CAJ1 OS=Saccharomyces cerevisiae (strain ATCC 204508 / S288c) GN=CAJ1 PE=1 SV=1//3.1503e-13
Cla002249	2230.99	1386.04	0.68672	0.015949	0.043289	up	sp|P46643|AAT1_ARATH Aspartate aminotransferase, mitochondrial OS=Arabidopsis thaliana GN=ASP1 PE=1 SV=1//0
Cla002251	420.95	0	Inf	3.6382e-11	5.8284e-10	up	sp|A7NY33|PER4_VITVI Peroxidase 4 OS=Vitis vinifera GN=GSVIVT00023967001 PE=1 SV=1//1.77489e-140
Cla002262	14337.4	8776.61	0.70805	0.016331	0.044133	up	sp|Q96453|1433D_SOYBN 14-3-3-like protein D OS=Glycine max GN=GF14D PE=2 SV=1//5.62851e-126
Cla002291	2398.71	901.52	1.4118	1.4047e-06	1.0816e-05	up	sp|Q94A41|AMY3_ARATH Alpha-amylase 3, chloroplastic OS=Arabidopsis thaliana GN=AMY3 PE=2 SV=1//1.26285e-172
Cla002312	2013.16	1123.19	0.84186	0.0033361	0.011443	up	sp|Q8GVE8|CAPP4_ARATH Phosphoenolpyruvate carboxylase 4 OS=Arabidopsis thaliana GN=PPC4 PE=2 SV=1//0
Cla002313	926.566	199.264	2.2172	0.0046429	0.015181	up	sp|Q9CA40|NUDT1_ARATH Nudix hydrolase 1 OS=Arabidopsis thaliana GN=NUDT1 PE=1 SV=1//3.47853e-57
Cla002319	3425.86	136.906	4.6452	0.0022123	0.0080042	up	sp|Q9LIG0|Y3136_ARATH Clavaminate synthase-like protein At3g21360 OS=Arabidopsis thaliana GN=At3g21360 PE=1 SV=1//6.32333e-74
Cla002321	169.977	5.1567	5.0428	0.0057655	0.018246	up	sp|Q29PU4|CLE12_ARATH CLAVATA3/ESR (CLE)-related protein 12 OS=Arabidopsis thaliana GN=CLE12 PE=2 SV=1//4.037e-10
Cla002322	57.0171	0	Inf	2.9637e-05	0.00017648	up	-//-
Cla002333	2833.94	1464.01	0.95289	0.00098016	0.0039822	up	sp|Q94BP0|SLK2_ARATH Probable transcriptional regulator SLK2 OS=Arabidopsis thaliana GN=SLK2 PE=1 SV=1//2.29638e-122
Cla002349	3372.35	1127.03	1.5812	4.7504e-08	4.7323e-07	up	-//-
Cla002353	2005.64	1145.64	0.80791	0.0055361	0.017625	up	sp|Q8LPQ6|AB28B_ARATH ABC transporter B family member 28 OS=Arabidopsis thaliana GN=ABCB28 PE=2 SV=1//0
Cla002354	733.856	396.841	0.88694	0.0052685	0.016916	up	sp|Q1XDS2|YCF20_PYRYE Uncharacterized protein ycf20 OS=Pyropia yezoensis GN=ycf20 PE=3 SV=1//1.76993e-12
Cla002361	728.619	353.535	1.0433	0.0014716	0.005658	up	sp|Q9SM59|PGMP_PEA Phosphoglucomutase, chloroplastic OS=Pisum sativum GN=PGMP PE=2 SV=1//1.8136e-139
Cla002370	1995.83	724.163	1.4626	7.8668e-07	6.3648e-06	up	sp|Q6IDL4|P24D3_ARATH Transmembrane emp24 domain-containing protein p24delta3 OS=Arabidopsis thaliana GN=At1g09580 PE=1 SV=1//3.00755e-85
Cla002373	2231.03	1015.23	1.1359	0.00012256	0.00063082	up	sp|Q9M1A8|RPB8B_ARATH DNA-directed RNA polymerases II, IV and V subunit 8B OS=Arabidopsis thaliana GN=NRPB8B PE=1 SV=1//1.00019e-36
Cla002375	181.972	83.398	1.1256	0.011698	0.033344	up	-//-
Cla002376	1475.95	588.896	1.3256	1.1325e-05	7.3071e-05	up	sp|Q2R1U4|CK5P1_ORYSJ CDK5RAP1-like protein OS=Oryza sativa subsp. japonica GN=Os11g0592800 PE=2 SV=1//0
Cla002379	989.027	576.502	0.77869	0.012927	0.036266	up	sp|F4ICF4|RBL10_ARATH RHOMBOID-like protein 10, chloroplastic OS=Arabidopsis thaliana GN=RBL10 PE=2 SV=1//4.13621e-78
Cla002393	4428.5	1606	1.4633	0.00030877	0.0014268	up	sp|O64894|ACOX2_CUCMA Acyl-coenzyme A oxidase, peroxisomal OS=Cucurbita maxima GN=Acx PE=1 SV=1//0
Cla002405	576.399	220.375	1.3871	7.1257e-05	0.00038953	up	-//-
Cla002410	470.969	200.752	1.2302	0.00053829	0.002354	up	sp|Q0WTB4|Y3725_ARATH GTP-binding protein At3g49725, chloroplastic OS=Arabidopsis thaliana GN=At3g49725 PE=2 SV=2//1.6547e-26
Cla002412	310.126	142.25	1.1244	0.0041132	0.013704	up	sp|Q0WTB4|Y3725_ARATH GTP-binding protein At3g49725, chloroplastic OS=Arabidopsis thaliana GN=At3g49725 PE=2 SV=2//2.38673e-48
Cla002413	581.761	227.973	1.3516	9.8446e-05	0.0005188	up	sp|Q0WTB4|Y3725_ARATH GTP-binding protein At3g49725, chloroplastic OS=Arabidopsis thaliana GN=At3g49725 PE=2 SV=2//4.46125e-07
Cla002414	557.199	323.215	0.7857	0.017787	0.047465	up	sp|P50433|GLYM_SOLTU Serine hydroxymethyltransferase, mitochondrial OS=Solanum tuberosum PE=2 SV=1//0
Cla002415	2863.63	1076.64	1.4113	1.3302e-06	1.0297e-05	up	sp|Q949P2|COPDA_ARATH Probable cytosolic oligopeptidase A OS=Arabidopsis thaliana GN=CYOP PE=1 SV=1//2.72219e-148
Cla002417	4889.7	1787.44	1.4519	3.4294e-07	2.9761e-06	up	sp|Q94AM1|OOPDA_ARATH Organellar oligopeptidase A, chloroplastic/mitochondrial OS=Arabidopsis thaliana GN=OOP PE=1 SV=1//7.79408e-180
Cla002430	11998.9	5231.63	1.1976	1.1863e-05	7.6225e-05	up	sp|P17783|MDHM_CITLA Malate dehydrogenase, mitochondrial OS=Citrullus lanatus GN=MMDH PE=1 SV=1//0
Cla002432	39.8198	6.13357	2.6987	0.0052223	0.016791	up	sp|Q1PFD9|TBL31_ARATH Protein trichome birefringence-like 31 OS=Arabidopsis thaliana GN=TBL31 PE=2 SV=1//0
Cla002442	3129.51	776.782	2.0104	1.0845e-11	1.8511e-10	up	sp|P73555|Y875_SYNY3 Uncharacterized membrane protein sll0875 OS=Synechocystis sp. (strain PCC 6803 / Kazusa) GN=sll0875 PE=3 SV=1//7.2643e-46
Cla002444	985.159	471.393	1.0634	0.00064878	0.0027791	up	sp|Q9SYM2|BBX22_ARATH B-box zinc finger protein 22 OS=Arabidopsis thaliana GN=BBX22 PE=1 SV=2//8.40554e-97
Cla002470	4801.26	237.614	4.3367	0.00011102	0.00057778	up	sp|Q40294|AOX1_MANIN Ubiquinol oxidase, mitochondrial OS=Mangifera indica GN=AOMI 1 PE=1 SV=2//4.1283e-173
Cla002474	3208.09	1952.33	0.71652	0.012031	0.034162	up	sp|Q9LME4|P2C09_ARATH Probable protein phosphatase 2C 9 OS=Arabidopsis thaliana GN=At1g22280 PE=1 SV=1//2.08673e-143
Cla002517	1794.65	427.095	2.0711	1.5439e-11	2.5805e-10	up	sp|O22229|TRXB3_ARATH NADPH-dependent thioredoxin reductase 3 OS=Arabidopsis thaliana GN=NTRC PE=1 SV=2//0
Cla002538	4174.43	90.5074	5.5274	2.1236e-18	7.3877e-17	up	-//-
Cla002539	69.4857	0	Inf	0.00016607	0.00082636	up	-//-
Cla002582	5287.43	3083.36	0.77806	0.0049835	0.016145	up	sp|Q9STM4|C3H43_ARATH Zinc finger CCCH domain-containing protein 43 OS=Arabidopsis thaliana GN=At3g48440 PE=2 SV=1//3.74921e-12
Cla002584	849.228	0	Inf	6.4203e-10	8.5461e-09	up	sp|Q9STM6|GDL57_ARATH GDSL esterase/lipase At3g48460 OS=Arabidopsis thaliana GN=At3g48460 PE=2 SV=1//5.57585e-170
Cla002590	3785.57	1820.68	1.056	0.00020331	0.00098863	up	sp|Q8W425|PSMD6_ORYSJ 26S proteasome non-ATPase regulatory subunit 6 OS=Oryza sativa subsp. japonica GN=RPN7 PE=2 SV=1//0
Cla002591	356.251	121.672	1.5499	7.401e-05	0.00040337	up	-//-
Cla002593	515.604	276.108	0.90103	0.0090108	0.026685	up	sp|P47923|NDK2_PEA Nucleoside diphosphate kinase 2, chloroplastic OS=Pisum sativum GN=NDPK2 PE=1 SV=1//2.85657e-93
Cla002597	60856.1	20484.7	1.5709	1.1469e-08	1.2614e-07	up	sp|Q7FAH2|G3PC2_ORYSJ Glyceraldehyde-3-phosphate dehydrogenase 2, cytosolic OS=Oryza sativa subsp. japonica GN=GAPC2 PE=1 SV=1//0
Cla002598	2199.22	781.424	1.4928	0.00041269	0.0018503	up	sp|P26520|G3PC_PETHY Glyceraldehyde-3-phosphate dehydrogenase, cytosolic OS=Petunia hybrida GN=GAPC PE=2 SV=1//0
Cla002599	1273.13	91.4532	3.7992	1.9476e-27	1.4797e-25	up	-//-
Cla002604	1770.15	373.631	2.2442	3.7623e-13	7.6826e-12	up	sp|Q84P23|4CLL9_ARATH 4-coumarate--CoA ligase-like 9 OS=Arabidopsis thaliana GN=4CLL9 PE=1 SV=2//0
Cla002625	2640.53	1420.01	0.89493	0.0015716	0.0059895	up	sp|P38385|SC61G_ORYSJ Protein transport protein Sec61 subunit gamma OS=Oryza sativa subsp. japonica GN=Os02g0178400 PE=3 SV=1//3.82739e-32
Cla002642	749.607	105.315	2.8314	2.3181e-07	2.068e-06	up	sp|Q9ZVM9|Y1461_ARATH Probable serine/threonine-protein kinase At1g54610 OS=Arabidopsis thaliana GN=At1g54610 PE=1 SV=1//0
Cla002647	1231.33	686.776	0.84231	0.0053251	0.01707	up	sp|Q9FI46|CRL_ARATH Chromophore lyase CRL, chloroplastic OS=Arabidopsis thaliana GN=CRL PE=1 SV=1//7.45126e-120
Cla002648	14894.3	9586.5	0.63569	0.018098	0.04818	up	sp|Q39817|CALX_SOYBN Calnexin homolog OS=Glycine max PE=2 SV=1//0
Cla002655	3739.32	894.169	2.0642	2.0627e-12	3.9097e-11	up	sp|Q84JF5|PTA14_ARATH Protein PLASTID TRANSCRIPTIONALLY ACTIVE 14 OS=Arabidopsis thaliana GN=PTAC14 PE=1 SV=1//0
Cla002682	280.324	92.8791	1.5937	0.002588	0.0091879	up	sp|P42735|CDI8_ARATH Cadmium-induced protein AS8 OS=Arabidopsis thaliana GN=At4g19070 PE=2 SV=1//2.06556e-29
Cla002687	1854.68	862.122	1.1052	0.00017421	0.00086366	up	-//-
Cla002691	72.9795	2.84653	4.6802	6.9918e-08	6.7474e-07	up	sp|P26302|KPPR_WHEAT Phosphoribulokinase, chloroplastic OS=Triticum aestivum PE=2 SV=1//0
Cla002709	558.834	298.63	0.90406	0.0075226	0.022872	up	sp|Q9CQ29|RN151_MOUSE RING finger protein 151 OS=Mus musculus GN=Rnf151 PE=1 SV=1//8.79441e-09
Cla002726	1509.62	905.263	0.73778	0.012247	0.034674	up	sp|O24035|PANC_LOTJA Pantoate--beta-alanine ligase OS=Lotus japonicus GN=PANC PE=1 SV=3//1.26241e-161
Cla002732	613.647	248.484	1.3043	9.3592e-05	0.00049556	up	sp|Q9FKB0|LSM5_ARATH Sm-like protein LSM5 OS=Arabidopsis thaliana GN=LSM5 PE=1 SV=1//1.19974e-30
Cla002739	2736.84	1385.68	0.98192	0.00060215	0.0026039	up	sp|Q9M8Z7|U80A2_ARATH Sterol 3-beta-glucosyltransferase UGT80A2 OS=Arabidopsis thaliana GN=UGT80A2 PE=1 SV=1//0
Cla002743	367.337	171.993	1.0948	0.0028631	0.010044	up	-//-
Cla002747	8500.61	4844.24	0.8113	0.0033219	0.011406	up	sp|Q9SZD4|PRS4A_ARATH 26S proteasome regulatory subunit 4 homolog A OS=Arabidopsis thaliana GN=RPT2A PE=1 SV=1//0
Cla002749	2038.04	20.6015	6.6283	1.206e-08	1.3229e-07	up	sp|Q8GZM7|PIF1_ARATH Transcription factor PIF1 OS=Arabidopsis thaliana GN=PIF1 PE=1 SV=1//9.52286e-58
Cla002756	11639.6	1376.74	3.0797	1.2254e-24	7.7594e-23	up	sp|Q9M682|GMK2_ARATH Guanylate kinase 2 OS=Arabidopsis thaliana GN=GK-2 PE=2 SV=1//8.61726e-180
Cla002769	4255.56	1284.28	1.7284	4.337e-07	3.7014e-06	up	sp|Q9FNB0|CHLH_ARATH Magnesium-chelatase subunit ChlH, chloroplastic OS=Arabidopsis thaliana GN=CHLH PE=1 SV=1//0
Cla002793	2562.88	931.213	1.4606	6.4575e-07	5.3211e-06	up	sp|P42732|RR13_ARATH 30S ribosomal protein S13, chloroplastic OS=Arabidopsis thaliana GN=RPS13 PE=2 SV=1//1.35056e-82
Cla002801	5744.98	3371.54	0.76889	0.004752	0.01549	up	sp|Q94DM8|UFM1_ORYSJ Ubiquitin-fold modifier 1 OS=Oryza sativa subsp. japonica GN=Os01g0962400 PE=3 SV=1//1.37981e-55
Cla002813	685.869	407.316	0.75178	0.018605	0.049331	up	-//-
Cla002815	28100.5	2229.73	3.6557	6.7736e-08	6.5526e-07	up	sp|Q9LD45|BI1_ARATH Bax inhibitor 1 OS=Arabidopsis thaliana GN=BI-1 PE=1 SV=1//2.26497e-112
Cla002818	268.059	69.3202	1.9512	5.0677e-06	3.5162e-05	up	sp|A6T923|HPXO_KLEP7 FAD-dependent urate hydroxylase OS=Klebsiella pneumoniae subsp. pneumoniae (strain ATCC 700721 / MGH 78578) GN=hpxO PE=1 SV=1//2.85262e-22
Cla002824	572.275	325.167	0.81553	0.011976	0.034032	up	sp|O23522|PLA14_ARATH Phospholipase A1-Ibeta2, chloroplastic OS=Arabidopsis thaliana GN=At4g16820 PE=1 SV=2//0
Cla002829	7217.2	1412.23	2.3535	2.6145e-16	7.5512e-15	up	-//-
Cla002832	35982.7	2544.3	3.822	0.016265	0.043982	up	-//-
Cla002866	530.214	246.546	1.1047	0.0010787	0.0043271	up	sp|Q84LH3|WEX_ARATH Werner Syndrome-like exonuclease OS=Arabidopsis thaliana GN=WEX PE=1 SV=1//7.9549e-26
Cla002887	768.912	442.544	0.797	0.013014	0.036473	up	sp|Q5RFQ0|FCF1_PONAB rRNA-processing protein FCF1 homolog OS=Pongo abelii GN=FCF1 PE=2 SV=1//6.9906e-93
Cla002891	782.651	193.422	2.0166	2.7723e-09	3.3665e-08	up	sp|O80366|ARR9_ARATH Two-component response regulator ARR9 OS=Arabidopsis thaliana GN=ARR9 PE=1 SV=1//1.32905e-77
Cla002900	634.723	347.66	0.86845	0.0080752	0.024291	up	sp|Q9LZA4|PMT7_ARATH Probable methyltransferase PMT7 OS=Arabidopsis thaliana GN=At5g04060 PE=2 SV=1//0
Cla002904	21.4277	0.289185	6.2113	0.0079566	0.023992	up	-//-
Cla002944	25312.4	15863.1	0.67416	0.015699	0.042722	up	sp|Q56WD9|THIK2_ARATH 3-ketoacyl-CoA thiolase 2, peroxisomal OS=Arabidopsis thaliana GN=PED1 PE=1 SV=2//0
Cla002946	3029.98	1713.07	0.82272	0.0040013	0.013393	up	sp|Q55680|Y005_SYNY3 Uncharacterized protein sll0005 OS=Synechocystis sp. (strain PCC 6803 / Kazusa) GN=sll0005 PE=3 SV=1//9.00696e-126
Cla002951	8948.32	4786.98	0.9025	0.0011342	0.0045066	up	sp|O48844|PSD1A_ARATH 26S proteasome non-ATPase regulatory subunit 1 homolog A OS=Arabidopsis thaliana GN=RPN2A PE=1 SV=1//0
Cla002955	866.827	193.561	2.163	1.624e-10	2.3881e-09	up	sp|O48837|LRKS2_ARATH Receptor like protein kinase S.2 OS=Arabidopsis thaliana GN=LECRKS2 PE=2 SV=2//5.84263e-55
Cla003005	3103.48	1564.95	0.98777	0.00048377	0.0021408	up	sp|Q9FFP9|SRK2H_ARATH Serine/threonine-protein kinase SRK2H OS=Arabidopsis thaliana GN=SRK2H PE=1 SV=1//0
Cla003070	5347.61	1631.11	1.713	0.00011339	0.00058768	up	sp|Q949Y5|EGY1_ARATH Probable zinc metalloprotease EGY1, chloroplastic OS=Arabidopsis thaliana GN=EGY1 PE=2 SV=1//0
Cla003075	5219.86	1501.13	1.798	2.6475e-08	2.7479e-07	up	sp|Q9ASS7|CAAT2_ARATH Cationic amino acid transporter 2, vacuolar OS=Arabidopsis thaliana GN=CAT2 PE=2 SV=1//0
Cla003078	49.298	0	Inf	1.9768e-08	2.094e-07	up	-//-
Cla003082	145.167	21.9298	2.7268	1.2917e-06	1.0011e-05	up	sp|Q4I8E9|PNS1_GIBZE Protein PNS1 OS=Gibberella zeae (strain PH-1 / ATCC MYA-4620 / FGSC 9075 / NRRL 31084) GN=PNS1 PE=3 SV=1//7.417e-11
Cla003083	654.391	277.022	1.2402	0.00017655	0.00087366	up	-//-
Cla003128	703.142	32.122	4.4522	3.3095e-28	2.7115e-26	up	sp|Q9C5M0|DTC_ARATH Mitochondrial dicarboxylate/tricarboxylate transporter DTC OS=Arabidopsis thaliana GN=DTC PE=1 SV=1//1.86102e-123
Cla003129	9733.41	2997.07	1.6994	0.00011296	0.00058606	up	sp|O22349|TBA3_ELEIN Tubulin alpha-3 chain OS=Eleusine indica GN=TUBA3 PE=2 SV=1//0
Cla003132	393.573	145.061	1.44	0.0001098	0.00057249	up	sp|Q9FFZ1|PPH_ARATH Pheophytinase, chloroplastic OS=Arabidopsis thaliana GN=PPH PE=1 SV=1//1.5971e-25
Cla003148	281.989	60.8275	2.2128	2.9145e-07	2.5614e-06	up	sp|O49840|APK2B_ARATH Protein kinase 2B, chloroplastic OS=Arabidopsis thaliana GN=APK2B PE=2 SV=1//1.32766e-148
Cla003152	255.664	84.9954	1.5888	0.00014077	0.00071249	up	sp|F8WKW8|UGT9_GARJA Beta-D-glucosyl crocetin beta-1,6-glucosyltransferase OS=Gardenia jasminoides GN=UGT94E5 PE=1 SV=1//1.58405e-124
Cla003154	1045.47	584.956	0.83776	0.0067604	0.020909	up	-//-
Cla003155	4070.87	2402.69	0.76069	0.017014	0.0457	up	sp|Q9UTK2|RM19_SCHPO 54S ribosomal protein L19, mitochondrial OS=Schizosaccharomyces pombe (strain 972 / ATCC 24843) GN=mrpl19 PE=3 SV=1//3.64282e-33
Cla003173	8354.45	2678.98	1.6409	6.4616e-09	7.3737e-08	up	sp|Q9M015|Y5161_ARATH Uncharacterized protein At5g01610 OS=Arabidopsis thaliana GN=At5g01610 PE=1 SV=1//7.59729e-06
Cla003184	801.7	480.192	0.73945	0.017095	0.045875	up	-//-
Cla003196	919.491	0.882698	10.025	4.4258e-06	3.1085e-05	up	sp|Q42517|PERN_ARMRU Peroxidase N OS=Armoracia rusticana GN=HRPN PE=2 SV=1//2.60466e-141
Cla003217	6048.62	2994.06	1.0145	0.0002964	0.001376	up	sp|Q38922|RAB1B_ARATH Ras-related protein RABB1b OS=Arabidopsis thaliana GN=RABB1B PE=2 SV=1//1.0429e-148
Cla003220	6356.23	4074	0.64173	0.018511	0.049151	up	sp|P23438|SSRB_CANFA Translocon-associated protein subunit beta OS=Canis familiaris GN=SSR2 PE=1 SV=1//1.16117e-09
Cla003221	2455	1372.07	0.83937	0.0036893	0.012488	up	-//-
Cla003237	2014.91	1161.5	0.79473	0.0063695	0.019896	up	-//-
Cla003250	666.479	377.983	0.81824	0.012891	0.03619	up	-//-
Cla003262	1339.84	229.724	2.5441	4.8723e-15	1.2475e-13	up	sp|Q8L633|RNZC_ARATH Ribonuclease Z, chloroplastic OS=Arabidopsis thaliana GN=CPZ PE=2 SV=1//5.77512e-173
Cla003275	66.2441	6.30162	3.394	4.0737e-05	0.00023524	up	sp|Q8S397|NHX4_ARATH Sodium/hydrogen exchanger 4 OS=Arabidopsis thaliana GN=NHX4 PE=2 SV=2//0
Cla003284	1753.13	663.242	1.4023	0.0012137	0.0047806	up	sp|Q9M4Y3|RR10_MESCR 30S ribosomal protein S10, chloroplastic OS=Mesembryanthemum crystallinum GN=RPS10 PE=2 SV=1//1.23263e-81
Cla003285	760.299	236.33	1.6858	6.7601e-07	5.5386e-06	up	sp|Q42588|SAT1_ARATH Serine acetyltransferase 1, chloroplastic OS=Arabidopsis thaliana GN=SAT1 PE=1 SV=2//2.52746e-128
Cla003291	729.614	182.636	1.9982	5.0223e-09	5.8473e-08	up	sp|Q9SNC6|PUB13_ARATH U-box domain-containing protein 13 OS=Arabidopsis thaliana GN=PUB13 PE=1 SV=1//3.8567e-08
Cla003292	488.643	265.644	0.87929	0.010678	0.030826	up	sp|Q6P6Q6|MTEF3_RAT Transcription termination factor 3, mitochondrial OS=Rattus norvegicus GN=Mterf3 PE=2 SV=1//1.67423e-10
Cla003293	1192.44	717.384	0.7331	0.01498	0.041073	up	sp|A0SWL0|FRL2A_ARATH FRIGIDA-like protein 2 OS=Arabidopsis thaliana GN=FRL2 PE=3 SV=1//5.20998e-67
Cla003298	1562.22	821.404	0.92744	0.0015209	0.0058207	up	-//-
Cla003300	775.025	364.932	1.0866	0.00083124	0.0034495	up	sp|Q8VYE2|TIM50_ARATH Mitochondrial import inner membrane translocase subunit TIM50 OS=Arabidopsis thaliana GN=TIM50 PE=1 SV=1//2.99795e-113
Cla003318	15864.8	5373.5	1.5619	1.2985e-08	1.4165e-07	up	sp|Q8GYN5|RIN4_ARATH RPM1-interacting protein 4 OS=Arabidopsis thaliana GN=RIN4 PE=1 SV=1//4.33116e-08
Cla003320	22355.5	7078.47	1.6591	2.2908e-09	2.8281e-08	up	sp|Q651X6|CSLE6_ORYSJ Cellulose synthase-like protein E6 OS=Oryza sativa subsp. japonica GN=CSLE6 PE=2 SV=1//0
Cla003330	3852.92	1769.22	1.1228	0.012372	0.034967	up	sp|P49351|FPPS1_LUPAL Farnesyl pyrophosphate synthase 1 OS=Lupinus albus GN=FPS1 PE=2 SV=1//0
Cla003333	337.909	82.475	2.0346	4.6982e-07	3.9809e-06	up	sp|Q944B0|FK161_ARATH Peptidyl-prolyl cis-trans isomerase FKBP16-1, chloroplastic OS=Arabidopsis thaliana GN=FKBP16-1 PE=2 SV=1//5.14382e-50
Cla003339	4938.09	2649.84	0.89805	0.0014509	0.0055878	up	sp|P46256|ALF1_PEA Fructose-bisphosphate aldolase, cytoplasmic isozyme 1 OS=Pisum sativum PE=2 SV=1//0
Cla003340	1570.87	577.456	1.4438	1.9238e-06	1.4448e-05	up	sp|Q84W65|SUFE1_ARATH SufE-like protein 1, chloroplastic/mitochondrial OS=Arabidopsis thaliana GN=SUFE1 PE=1 SV=2//8.13204e-121
Cla003347	395.101	25.5308	3.9519	3.9576e-18	1.3534e-16	up	sp|Q9ZVH0|FEZ_ARATH Protein FEZ OS=Arabidopsis thaliana GN=FEZ PE=2 SV=1//1.08823e-79
Cla003357	246.049	70.5746	1.8017	1.504e-05	9.4964e-05	up	-//-
Cla003365	1371.03	299.502	2.1946	3.1409e-11	5.071e-10	up	sp|Q9LSD6|ARP2_ARATH Actin-related protein 2 OS=Arabidopsis thaliana GN=ARP2 PE=1 SV=1//0
Cla003370	327.434	20.5021	3.9974	1.0567e-08	1.1719e-07	up	sp|Q9FYA2|WRK75_ARATH Probable WRKY transcription factor 75 OS=Arabidopsis thaliana GN=WRKY75 PE=2 SV=1//3.29742e-50
Cla003394	2404.88	1013.22	1.247	2.119e-05	0.00012964	up	-//-
Cla003400	2764.51	1708.89	0.69396	0.013211	0.03695	up	sp|Q93YP0|UEV1A_ARATH Ubiquitin-conjugating enzyme E2 variant 1A OS=Arabidopsis thaliana GN=UEV1A PE=1 SV=1//7.74472e-62
Cla003403	12570.6	5388.31	1.2221	0.010206	0.029677	up	sp|P93824|ACCH6_ARATH 1-aminocyclopropane-1-carboxylate oxidase homolog 6 OS=Arabidopsis thaliana GN=At1g04350 PE=2 SV=1//1.14461e-104
Cla003422	38875.7	10101.8	1.9443	4.2928e-12	7.8123e-11	up	sp|Q9FGZ9|UBL5_ARATH Ubiquitin-like protein 5 OS=Arabidopsis thaliana GN=UBL5 PE=3 SV=1//3.12282e-47
Cla003424	39.3999	0.289185	7.0901	3.4126e-06	2.45e-05	up	-//-
Cla003425	31.8935	2.76578	3.5275	0.0032045	0.011062	up	-//-
Cla003468	1235.78	317.871	1.9589	7.1902e-10	9.5078e-09	up	-//-
Cla003470	460.163	141.447	1.7019	3.6571e-06	2.6161e-05	up	sp|Q5R8J8|DNJB4_PONAB DnaJ homolog subfamily B member 4 OS=Pongo abelii GN=DNAJB4 PE=2 SV=1//9.0395e-33
Cla003471	218.938	80.2857	1.4473	0.00087689	0.0036158	up	sp|Q681Y3|Y1099_ARATH Putative transferase At1g60990, chloroplastic OS=Arabidopsis thaliana GN=At1g60990 PE=1 SV=1//4.96934e-59
Cla003478	1456.39	846.198	0.78333	0.012454	0.035156	up	sp|Q9SU30|CPR30_ARATH F-box protein CPR30 OS=Arabidopsis thaliana GN=CPR30 PE=1 SV=2//7.66722e-23
Cla003491	34435.7	18925.8	0.86355	0.0018577	0.0069106	up	sp|Q9NUJ3|T11L1_HUMAN T-complex protein 11-like protein 1 OS=Homo sapiens GN=TCP11L1 PE=1 SV=1//5.14334e-08
Cla003508	993.844	261.451	1.9265	4.6481e-09	5.4498e-08	up	sp|Q9LK31|Y3272_ARATH Kelch repeat-containing protein At3g27220 OS=Arabidopsis thaliana GN=At3g27220 PE=2 SV=1//0
Cla003513	159.387	64.2172	1.3115	0.0067417	0.020877	up	sp|Q9C942|CSE_ARATH Caffeoylshikimate esterase OS=Arabidopsis thaliana GN=CSE PE=1 SV=1//2.40704e-50
Cla003534	4590.44	198.941	4.5282	4.5368e-07	3.8588e-06	up	sp|Q9FK81|Y5258_ARATH Uncharacterized protein At5g22580 OS=Arabidopsis thaliana GN=At5g22580 PE=1 SV=1//5.34172e-39
Cla003550	380.134	139.281	1.4485	8.9533e-05	0.00047823	up	-//-
Cla003568	388.467	0	Inf	0.00022351	0.0010744	up	sp|Q9FFZ1|PPH_ARATH Pheophytinase, chloroplastic OS=Arabidopsis thaliana GN=PPH PE=1 SV=1//4.27755e-17
Cla003572	1315.57	289.208	2.1855	6.7212e-07	5.5089e-06	up	sp|Q9FHM7|HIR4_ARATH Hypersensitive-induced response protein 4 OS=Arabidopsis thaliana GN=HIR4 PE=1 SV=1//2.00213e-168
Cla003575	81.3278	0.912982	6.477	1.0184e-10	1.544e-09	up	-//-
Cla003576	456.428	229.812	0.98993	0.011319	0.032428	up	sp|Q9SB31|AHL3_ARATH AT-hook motif nuclear-localized protein 3 OS=Arabidopsis thaliana GN=AHL3 PE=1 SV=1//1.51234e-57
Cla003578	1127.06	454.821	1.3092	2.2651e-05	0.00013774	up	sp|P91924|ARF_DUGJA ADP-ribosylation factor OS=Dugesia japonica PE=2 SV=3//2.07941e-13
Cla003582	312.262	88.2721	1.8227	7.1939e-06	4.849e-05	up	sp|B0BML1|GNTK_XENTR Probable gluconokinase OS=Xenopus tropicalis GN=idnk PE=2 SV=1//2.3164e-30
Cla003586	3666.32	677.657	2.4357	2.4294e-16	7.047e-15	up	-//-
Cla003594	1160.65	475.823	1.2864	3.3276e-05	0.00019571	up	sp|D1KF50|SRS2L_ARATH ATP-dependent DNA helicase SRS2-like protein At4g25120 OS=Arabidopsis thaliana GN=SRS2 PE=1 SV=1//0
Cla003602	1613.82	746.181	1.1129	0.00020969	0.0010142	up	-//-
Cla003603	721.156	300.526	1.2628	0.00010432	0.00054647	up	-//-
Cla003604	1573.09	588.312	1.419	2.5061e-06	1.8508e-05	up	-//-
Cla003622	613.704	61.3153	3.3232	3.6187e-14	8.3588e-13	up	sp|Q9FLS0|FB253_ARATH F-box protein At5g07610 OS=Arabidopsis thaliana GN=At5g07610 PE=2 SV=1//8.18156e-59
Cla003623	2614.31	1036.58	1.3346	4.3792e-06	3.0811e-05	up	sp|P27061|PPA1_SOLLC Acid phosphatase 1 OS=Solanum lycopersicum GN=APS1 PE=2 SV=1//3.52796e-96
Cla003628	563.644	261.405	1.1085	0.0011191	0.0044535	up	sp|Q6USK2|CERK_ARATH Ceramide kinase OS=Arabidopsis thaliana GN=CERK PE=1 SV=1//0
Cla003637	1960.62	917.287	1.0959	0.00019695	0.0009626	up	-//-
Cla003644	15.23	0	Inf	0.0040211	0.013449	up	-//-
Cla003660	548.378	281.778	0.96061	0.0042951	0.014208	up	sp|Q54CM0|PPT3_DICDI Palmitoyl-protein thioesterase 3 OS=Dictyostelium discoideum GN=ppt3 PE=3 SV=1//8.45689e-43
Cla003665	3420.81	1115.07	1.6172	2.7854e-08	2.8791e-07	up	sp|O65202|ACOX1_ARATH Peroxisomal acyl-coenzyme A oxidase 1 OS=Arabidopsis thaliana GN=ACX1 PE=1 SV=1//0
Cla003666	961.875	16.8872	5.8318	2.3718e-43	4.5777e-41	up	sp|Q9FFN2|GLYT3_ARATH Probable glycosyltransferase At5g03795 OS=Arabidopsis thaliana GN=At5g03795 PE=3 SV=2//9.33232e-115
Cla003667	1106.69	597.841	0.88841	0.0036733	0.012438	up	-//-
Cla003668	4313.08	2286.61	0.91551	0.0010667	0.0042877	up	sp|Q9ZW85|LEUD3_ARATH 3-isopropylmalate dehydratase small subunit 3 OS=Arabidopsis thaliana GN=At2g43090 PE=1 SV=1//3.37004e-95
Cla003674	2665.19	1049.57	1.3444	5.4691e-06	3.7739e-05	up	-//-
Cla003724	543.56	274.668	0.98475	0.0040893	0.013638	up	-//-
Cla003726	15.963	0.726344	4.4579	0.016891	0.045413	up	-//-
Cla003733	281.328	51.7418	2.4429	0.0057164	0.018116	up	-//-
Cla003751	5231.36	1783.79	1.5522	3.7774e-08	3.8285e-07	up	sp|Q9FV46|ZDS_TARER Zeta-carotene desaturase, chloroplastic/chromoplastic OS=Tagetes erecta PE=2 SV=1//0
Cla003760	748.255	196.633	1.928	1.5055e-08	1.6248e-07	up	-//-
Cla003763	1572.78	438.434	1.8429	1.6993e-08	1.8202e-07	up	-//-
Cla003789	13495.5	212.791	5.9869	2.084e-22	1.1065e-20	up	sp|Q70II3|EF110_ARATH Ethylene-responsive transcription factor ERF110 OS=Arabidopsis thaliana GN=ERF110 PE=2 SV=2//7.07456e-28
Cla003860	2067.35	1290.36	0.68001	0.017034	0.045737	up	-//-
Cla003877	1489.17	899.717	0.72696	0.014168	0.039206	up	sp|A7SWD3|GID8_NEMVE Glucose-induced degradation protein 8 homolog OS=Nematostella vectensis GN=v1g247787 PE=3 SV=1//2.60876e-14
Cla003885	2600.01	1196.07	1.1202	0.00011121	0.00057864	up	sp|Q9ZSY2|DNJ15_ARATH Chaperone protein dnaJ 15 OS=Arabidopsis thaliana GN=ATJ15 PE=1 SV=1//0
Cla003894	654.76	173.323	1.9175	4.6147e-08	4.6085e-07	up	-//-
Cla003895	146.01	40.4025	1.8535	0.00044007	0.0019643	up	-//-
Cla003902	27406.2	6670.19	2.0387	3.2722e-06	2.3567e-05	up	sp|Q9ZU52|ALFC3_ARATH Probable fructose-bisphosphate aldolase 3, chloroplastic OS=Arabidopsis thaliana GN=FBA3 PE=1 SV=1//0
Cla003918	451.453	132.526	1.7683	1.7183e-05	0.00010702	up	-//-
Cla003922	2932.33	445.858	2.7174	1.4541e-16	4.3113e-15	up	-//-
Cla003925	1607.43	340.05	2.2409	0.0010376	0.0041854	up	sp|P34893|CH10_ARATH 10 kDa chaperonin OS=Arabidopsis thaliana GN=CPN10 PE=3 SV=1//8.12141e-41
Cla003928	219.41	99.8886	1.1352	0.0069498	0.02139	up	-//-
Cla003935	6594.27	1938.75	1.7661	2.5762e-06	1.8998e-05	up	sp|O22161|ADLO1_ARATH Protein ARABIDILLO 1 OS=Arabidopsis thaliana GN=FBX5 PE=1 SV=1//1.04156e-06
Cla003938	12084.6	3169.02	1.9311	2.2551e-09	2.7892e-08	up	sp|Q9ZSQ4|PGMC_POPTN Phosphoglucomutase, cytoplasmic OS=Populus tremula GN=PGM1 PE=2 SV=1//0
Cla003939	42.542	4.62203	3.2023	0.006951	0.02139	up	sp|O49298|PME6_ARATH Probable pectinesterase/pectinesterase inhibitor 6 OS=Arabidopsis thaliana GN=PME6 PE=2 SV=1//2.92479e-173
Cla003943	2597.49	1240.46	1.0662	0.00022666	0.0010864	up	sp|Q9ZU90|SKI28_ARATH F-box protein SKIP28 OS=Arabidopsis thaliana GN=SKIP28 PE=1 SV=1//7.87522e-64
Cla003952	9305.33	3770.84	1.3032	0.00050896	0.0022394	up	sp|Q9ZU95|NUD17_ARATH Nudix hydrolase 17, mitochondrial OS=Arabidopsis thaliana GN=NUDT17 PE=2 SV=1//1.42131e-86
Cla003959	241.769	73.3248	1.7213	0.013337	0.037261	up	sp|Q8LF21|DRP1C_ARATH Dynamin-related protein 1C OS=Arabidopsis thaliana GN=DRP1C PE=1 SV=2//0
Cla003960	810.905	73.1607	3.4704	1.5581e-18	5.4869e-17	up	sp|Q9LQV2|RDR1_ARATH RNA-dependent RNA polymerase 1 OS=Arabidopsis thaliana GN=RDR1 PE=2 SV=1//0
Cla003977	24328	18.108	10.392	2.7183e-07	2.4027e-06	up	sp|Q39547|CUCM1_CUCME Cucumisin OS=Cucumis melo PE=1 SV=1//0
Cla003979	187.796	3.75941	5.6425	1.1793e-17	3.8806e-16	up	sp|Q39547|CUCM1_CUCME Cucumisin OS=Cucumis melo PE=1 SV=1//2.42962e-18
Cla003985	6930.1	1672.42	2.0509	1.2307e-07	1.1469e-06	up	sp|Q9FN03|UVR8_ARATH Ultraviolet-B receptor UVR8 OS=Arabidopsis thaliana GN=UVR8 PE=1 SV=1//4.47024e-10
Cla003987	1892.98	1011.31	0.90443	0.0039884	0.013354	up	sp|O22285|PMTB_ARATH Probable methyltransferase PMT11 OS=Arabidopsis thaliana GN=At2g39750 PE=2 SV=1//0
Cla003989	1403.56	715.812	0.97144	0.0013253	0.0051575	up	sp|Q9LHT0|TRNHF_ARATH Tropinone reductase homolog At5g06060 OS=Arabidopsis thaliana GN=At5g06060 PE=2 SV=1//8.66521e-139
Cla003994	33.6456	0	Inf	0.0011109	0.0044253	up	sp|Q9LHS8|LBD33_ARATH LOB domain-containing protein 33 OS=Arabidopsis thaliana GN=LBD33 PE=2 SV=1//2.14214e-56
Cla003995	845.273	96.7666	3.1268	1.4312e-18	5.058e-17	up	sp|O98997|RCA_VIGRR Ribulose bisphosphate carboxylase/oxygenase activase, chloroplastic OS=Vigna radiata var. radiata GN=RCA PE=2 SV=2//0
Cla003998	16.6307	0.289185	5.8457	0.012969	0.036364	up	sp|Q9CAY3|GPAT5_ARATH Glycerol-3-phosphate acyltransferase 5 OS=Arabidopsis thaliana GN=GPAT5 PE=1 SV=1//0
Cla003999	6228.97	2338.29	1.4135	4.7221e-07	3.9977e-06	up	sp|P0CH30|RING1_GOSHI E3 ubiquitin-protein ligase RING1 OS=Gossypium hirsutum GN=RING1 PE=1 SV=1//1.06029e-28
Cla004001	2270.5	1.88481	10.234	2.2803e-91	3.521e-88	up	-//-
Cla004003	3869.74	2353.82	0.71723	0.012873	0.036159	up	sp|Q9FFY9|TRP4_ARATH Telomere repeat-binding protein 4 OS=Arabidopsis thaliana GN=TRP4 PE=1 SV=1//4.69813e-140
Cla004011	4482.48	831.67	2.4302	1.6198e-16	4.7745e-15	up	sp|Q9ZV36|UXS6_ARATH UDP-glucuronic acid decarboxylase 6 OS=Arabidopsis thaliana GN=UXS6 PE=2 SV=1//0
Cla004016	889.013	448.434	0.98731	0.0052039	0.016745	up	-//-
Cla004022	17419.9	313.092	5.798	6.6052e-07	5.4272e-06	up	sp|O80638|WTR14_ARATH WAT1-related protein At2g39510 OS=Arabidopsis thaliana GN=At2g39510 PE=2 SV=1//2.12808e-61
Cla004026	338.737	7.47018	5.5029	1.1128e-09	1.4411e-08	up	sp|Q9SLD4|ZAT11_ARATH Zinc finger protein ZAT11 OS=Arabidopsis thaliana GN=ZAT11 PE=2 SV=1//2.04374e-34
Cla004028	54.8783	9.84765	2.4784	0.0021553	0.007825	up	sp|Q9LX14|UFC_ARATH Protein UPSTREAM OF FLC OS=Arabidopsis thaliana GN=UFC PE=2 SV=1//1.18772e-28
Cla004063	5697.56	2439.65	1.2237	0.011258	0.032279	up	sp|P82024|RR21_SPIOL 30S ribosomal protein S21, chloroplastic (Fragment) OS=Spinacia oleracea GN=rps21 PE=1 SV=1//2.61968e-15
Cla004072	1800.42	684.499	1.3952	3.4463e-06	2.4733e-05	up	sp|Q8TP15|HTPX2_METAC Protease HtpX homolog 2 OS=Methanosarcina acetivorans (strain ATCC 35395 / DSM 2834 / JCM 12185 / C2A) GN=htpX2 PE=3 SV=1//6.28952e-11
Cla004074	2184.95	1207.59	0.85547	0.0030301	0.01053	up	sp|P92792|TOM20_SOLTU Mitochondrial import receptor subunit TOM20 OS=Solanum tuberosum GN=TOM20 PE=1 SV=1//1.39068e-90
Cla004075	2129.51	1320.27	0.68969	0.017858	0.047616	up	sp|P0AFR6|YCIO_SHIFL Uncharacterized protein YciO OS=Shigella flexneri GN=yciO PE=3 SV=1//1.44934e-28
Cla004092	9397.82	5879.51	0.67663	0.017005	0.045683	up	sp|Q9FYG3|PLST2_ARATH Probable plastidic glucose transporter 2 OS=Arabidopsis thaliana GN=At1g67300 PE=2 SV=1//0
Cla004094	6707.14	2476.88	1.4372	1.3421e-05	8.5522e-05	up	sp|Q9XEX2|PRX2B_ARATH Peroxiredoxin-2B OS=Arabidopsis thaliana GN=PRXIIB PE=1 SV=1//2.42988e-95
Cla004097	124.67	2.17903	5.8383	1.7526e-12	3.3602e-11	up	sp|Q07469|BSPA_POPDE Bark storage protein A OS=Populus deltoides GN=BSPA PE=2 SV=1//4.62874e-39
Cla004109	2049.84	684.443	1.5825	1.1518e-07	1.0788e-06	up	sp|Q8W593|LGUC_ARATH Probable lactoylglutathione lyase, chloroplast OS=Arabidopsis thaliana GN=At1g67280 PE=1 SV=1//3.00442e-178
Cla004111	46.1502	0.304327	7.2446	3.9889e-07	3.4291e-06	up	sp|Q5XF85|ATL42_ARATH E3 ubiquitin-protein ligase ATL42 OS=Arabidopsis thaliana GN=ATL42 PE=1 SV=2//5.81537e-95
Cla004148	1238.07	305.902	2.0169	4.0193e-08	4.0583e-07	up	sp|Q3E6P4|FB95_ARATH F-box protein At2g02240 OS=Arabidopsis thaliana GN=At2g02240 PE=2 SV=1//4.77976e-77
Cla004181	1882.12	575.848	1.7086	1.4766e-08	1.5978e-07	up	sp|O50046|TRPB_CAMAC Tryptophan synthase beta chain 2, chloroplastic OS=Camptotheca acuminata GN=TSB PE=2 SV=1//0
Cla004183	2590.81	1258.61	1.0416	0.00030944	0.0014296	up	-//-
Cla004216	859.259	297.722	1.5291	2.7265e-06	1.9996e-05	up	sp|Q9FLW9|PKP2_ARATH Plastidial pyruvate kinase 2 OS=Arabidopsis thaliana GN=PKP2 PE=1 SV=1//0
Cla004219	302.675	96.8032	1.6446	4.1275e-05	0.00023821	up	-//-
Cla004220	278.827	4.50262	5.9525	0.00022179	0.0010671	up	sp|Q9LYS2|AB10C_ARATH ABC transporter C family member 10 OS=Arabidopsis thaliana GN=ABCC10 PE=2 SV=2//0
Cla004222	12175.4	6949.77	0.80893	0.0031076	0.010768	up	sp|P35133|UBC10_ARATH Ubiquitin-conjugating enzyme E2 10 OS=Arabidopsis thaliana GN=UBC10 PE=1 SV=1//1.68594e-106
Cla004237	5546.77	2571.74	1.1089	9.1076e-05	0.00048506	up	sp|Q94AT1|P2C76_ARATH Probable protein phosphatase 2C 76 OS=Arabidopsis thaliana GN=At5g53140 PE=2 SV=1//2.69417e-178
Cla004257	6330.69	2350.71	1.4293	4.5523e-07	3.8671e-06	up	sp|Q92QQ2|CLPX_RHIME ATP-dependent Clp protease ATP-binding subunit ClpX OS=Rhizobium meliloti (strain 1021) GN=clpX PE=3 SV=1//2.32468e-140
Cla004262	122.468	5.74849	4.4131	5.6051e-07	4.6763e-06	up	-//-
Cla004264	413.905	234.553	0.81939	0.017533	0.046926	up	sp|Q9M3A3|ABIL2_ARATH Protein ABIL2 OS=Arabidopsis thaliana GN=ABIL2 PE=2 SV=1//2.76166e-111
Cla004274	217.13	85.416	1.346	0.0020425	0.007479	up	sp|Q8LAP8|DOF46_ARATH Dof zinc finger protein DOF4.6 OS=Arabidopsis thaliana GN=DOF4.6 PE=2 SV=2//5.55731e-32
Cla004277	653.731	271.91	1.2656	0.0001415	0.00071563	up	sp|Q94A65|STR14_ARATH Rhodanese-like domain-containing protein 14, chloroplastic OS=Arabidopsis thaliana GN=At4g27700 PE=2 SV=1//2.87549e-92
Cla004278	2660.68	1483	0.84328	0.0030284	0.010528	up	sp|Q7ZZ25|ATD1A_DANRE ATPase family AAA domain-containing protein 1-A OS=Danio rerio GN=atad1a PE=2 SV=2//3.60974e-98
Cla004282	8381.28	2339.1	1.8412	7.4029e-11	1.1404e-09	up	sp|Q8LHP0|ELOF1_ORYSJ Transcription elongation factor 1 homolog OS=Oryza sativa subsp. japonica GN=Os07g0631100 PE=3 SV=1//5.78821e-44
Cla004284	1219.8	574.865	1.0853	0.00037997	0.0017171	up	sp|Q0VC50|RT4I1_BOVIN Reticulon-4-interacting protein 1, mitochondrial OS=Bos taurus GN=RTN4IP1 PE=2 SV=1//5.05154e-46
Cla004291	98.4271	8.55636	3.524	3.6258e-07	3.1371e-06	up	sp|B6IN38|RL33_RHOCS 50S ribosomal protein L33 OS=Rhodospirillum centenum (strain ATCC 51521 / SW) GN=rpmG PE=3 SV=1//1.32616e-10
Cla004294	320.783	129.385	1.3099	0.00070172	0.0029742	up	sp|Q9LUH3|LAL5_ARATH MATE efflux family protein LAL5 OS=Arabidopsis thaliana GN=LAL5 PE=2 SV=1//5.41088e-162
Cla004297	3260.31	1221.71	1.4161	1.0314e-06	8.154e-06	up	sp|Q5QQ53|XYLT_DROPS Xylosyltransferase oxt OS=Drosophila pseudoobscura pseudoobscura GN=oxt PE=2 SV=1//9.09485e-21
Cla004314	197.844	1.73511	6.8332	1.6381e-21	7.8474e-20	up	sp|P19037|HS181_ARATH 18.1 kDa class I heat shock protein OS=Arabidopsis thaliana GN=HSP18.1 PE=2 SV=1//2.28337e-71
Cla004315	41.8261	2.2177	4.2373	0.01613	0.043682	up	sp|P13853|HS17C_ARATH 17.6 kDa class I heat shock protein 3 OS=Arabidopsis thaliana GN=HSP17.6C PE=2 SV=2//7.79063e-71
Cla004325	1725.64	47.0507	5.1968	4.5221e-10	6.2344e-09	up	sp|O20252|S17P_SPIOL Sedoheptulose-1,7-bisphosphatase, chloroplastic OS=Spinacia oleracea PE=2 SV=1//0
Cla004329	17724.5	10606.5	0.7408	0.0057805	0.018281	up	sp|O04197|COI1_ARATH Coronatine-insensitive protein 1 OS=Arabidopsis thaliana GN=COI1 PE=1 SV=1//0
Cla004332	2851.61	1536.31	0.89231	0.0017953	0.0067059	up	sp|O04200|PXN_ARATH Peroxisomal nicotinamide adenine dinucleotide carrier OS=Arabidopsis thaliana GN=PXN PE=1 SV=1//2.7839e-157
Cla004339	936.549	64.4677	3.8607	9.3141e-06	6.1279e-05	up	sp|Q9FEL8|LAX1_MEDTR Auxin transporter-like protein 1 OS=Medicago truncatula GN=LAX1 PE=2 SV=1//0
Cla004343	2005.95	721.656	1.4749	0.00029662	0.0013767	up	-//-
Cla004344	2225.58	651.528	1.7723	2.2545e-09	2.7892e-08	up	sp|Q9SRM5|CPR49_ARATH GDSL esterase/lipase CPRD49 OS=Arabidopsis thaliana GN=CPRD49 PE=2 SV=1//1.14665e-119
Cla004386	444.09	244.833	0.85905	0.015207	0.041586	up	sp|Q5ZK33|LETM1_CHICK LETM1 and EF-hand domain-containing protein 1, mitochondrial OS=Gallus gallus GN=LETM1 PE=2 SV=1//8.45794e-93
Cla004412	8025.9	2277.12	1.8175	1.1312e-10	1.697e-09	up	sp|B2V855|GATA_SULSY Glutamyl-tRNA(Gln) amidotransferase subunit A OS=Sulfurihydrogenibium sp. (strain YO3AOP1) GN=gatA PE=3 SV=1//3.05199e-50
Cla004446	1287.14	218.675	2.5573	0.015016	0.041143	up	-//-
Cla004451	9789.78	5136.29	0.93055	0.00064983	0.002783	up	sp|F4JC97|PSME4_ARATH Proteasome activator subunit 4 OS=Arabidopsis thaliana GN=PA200 PE=2 SV=2//0
Cla004454	2497.84	101.444	4.6219	0.0037389	0.012639	up	sp|Q43609|COMT1_PRUDU Caffeic acid 3-O-methyltransferase OS=Prunus dulcis GN=COMT1 PE=2 SV=1//7.73454e-142
Cla004456	2537.88	114.362	4.4719	5.671e-10	7.645e-09	up	-//-
Cla004462	49.3199	10.2747	2.2631	0.0076188	0.023115	up	sp|Q9FM68|BAM4_ARATH Inactive beta-amylase 4, chloroplastic OS=Arabidopsis thaliana GN=BAM4 PE=2 SV=1//0
Cla004463	746.329	369.828	1.013	0.0016101	0.0061176	up	sp|Q9FM67|TI205_ARATH Protein TIC 20-v, chloroplastic OS=Arabidopsis thaliana GN=TIC20-V PE=2 SV=1//2.45002e-80
Cla004468	173.156	23.749	2.8661	0.0009416	0.0038479	up	sp|Q9FG72|OPT1_ARATH Oligopeptide transporter 1 OS=Arabidopsis thaliana GN=OPT1 PE=2 SV=1//0
Cla004470	257.092	71.4066	1.8482	0.00012655	0.0006495	up	sp|Q0V9N0|S14L5_XENTR SEC14-like protein 5 OS=Xenopus tropicalis GN=sec14l1 PE=2 SV=1//2.05721e-12
Cla004477	412.237	200.193	1.0421	0.0031615	0.01093	up	sp|F4K687|NMNAT_ARATH Nicotinamide/nicotinic acid mononucleotide adenylyltransferase OS=Arabidopsis thaliana GN=NMNAT PE=2 SV=1//5.49704e-120
Cla004479	421.063	176.687	1.2528	0.00064225	0.0027541	up	sp|Q9LK50|AB26G_ARATH ABC transporter G family member 26 OS=Arabidopsis thaliana GN=ABCG26 PE=3 SV=2//0
Cla004483	9847.78	4798.48	1.0372	0.016345	0.044164	up	sp|Q9S7N7|PSAG_ARATH Photosystem I reaction center subunit V, chloroplastic OS=Arabidopsis thaliana GN=PSAG PE=2 SV=1//1.89691e-66
Cla004490	599.532	176.188	1.7667	4.16e-07	3.5624e-06	up	-//-
Cla004493	467.857	241.677	0.95299	0.0052631	0.016906	up	sp|Q6ICW6|WNK11_ARATH Probable serine/threonine-protein kinase WNK11 OS=Arabidopsis thaliana GN=WNK11 PE=2 SV=1//8.34384e-171
Cla004497	2390.26	977.392	1.2902	8.7323e-06	5.7926e-05	up	sp|Q94EH2|TI222_ARATH Mitochondrial import inner membrane translocase subunit TIM22-2 OS=Arabidopsis thaliana GN=TIM22-2 PE=1 SV=1//2.22201e-63
Cla004510	692.426	325.545	1.0888	0.00084894	0.0035143	up	-//-
Cla004522	3174.8	64.1451	5.6292	1.1195e-06	8.7953e-06	up	sp|Q9LLL8|SBT4E_ARATH Subtilisin-like protease SBT4.14 OS=Arabidopsis thaliana GN=SBT4.14 PE=2 SV=1//0
Cla004541	2219.15	1023.83	1.116	0.0019033	0.0070384	up	sp|Q9LSM5|ECD_ARATH Protein ecdysoneless homolog OS=Arabidopsis thaliana GN=At5g65490 PE=1 SV=1//0
Cla004542	1200.89	73.1252	4.0376	2.9442e-29	2.6383e-27	up	sp|F4IJK1|NET2D_ARATH Protein NETWORKED 2D OS=Arabidopsis thaliana GN=NET2D PE=3 SV=1//8.53942e-113
Cla004553	617.378	262.831	1.232	0.00024088	0.001146	up	sp|Q500U8|TKPR1_ARATH Tetraketide alpha-pyrone reductase 1 OS=Arabidopsis thaliana GN=TKPR1 PE=1 SV=1//3.38361e-66
Cla004566	545.568	164.529	1.7294	1.0999e-06	8.6544e-06	up	sp|P69834|ISPD_ARATH 2-C-methyl-D-erythritol 4-phosphate cytidylyltransferase, chloroplastic OS=Arabidopsis thaliana GN=ISPD PE=1 SV=1//1.23605e-25
Cla004568	490.423	1.73511	8.1429	0.00017265	0.00085677	up	sp|P30236|HSP41_SOYBN 22.0 kDa class IV heat shock protein OS=Glycine max GN=HSP22.0 PE=3 SV=1//3.29815e-27
Cla004584	8232.31	1306.88	2.6552	1.6285e-19	6.4349e-18	up	sp|Q56X52|AOX4_ARATH Ubiquinol oxidase 4, chloroplastic/chromoplastic OS=Arabidopsis thaliana GN=AOX4 PE=1 SV=2//3.46575e-156
Cla004587	1608.52	119.132	3.7551	1.0609e-06	8.3641e-06	up	sp|Q41141|PFPB_RICCO Pyrophosphate--fructose 6-phosphate 1-phosphotransferase subunit beta OS=Ricinus communis GN=PFP-BETA PE=3 SV=1//0
Cla004589	4154.39	2103.41	0.98191	0.00048432	0.0021418	up	sp|Q9SUG6|PUX3_ARATH Plant UBX domain-containing protein 3 OS=Arabidopsis thaliana GN=PUX3 PE=1 SV=1//5.77626e-129
Cla004590	1207.33	580.775	1.0558	0.00048317	0.0021391	up	sp|Q9P281|BAHC1_HUMAN BAH and coiled-coil domain-containing protein 1 OS=Homo sapiens GN=BAHCC1 PE=1 SV=3//2.4547e-13
Cla004591	1446.95	15.8229	6.5149	1.7392e-07	1.5819e-06	up	sp|F4HYR6|SBT24_ARATH Subtilisin-like protease SBT2.4 OS=Arabidopsis thaliana GN=SBT2.4 PE=1 SV=1//0
Cla004597	3503.65	1649.72	1.0866	0.00013766	0.00069797	up	sp|O95822|DCMC_HUMAN Malonyl-CoA decarboxylase, mitochondrial OS=Homo sapiens GN=MLYCD PE=1 SV=3//4.54202e-84
Cla004608	673.981	207.636	1.6987	0.00080666	0.0033621	up	sp|Q56XV8|CPNA2_ARATH Chaperonin 60 subunit alpha 2, chloroplastic OS=Arabidopsis thaliana GN=CPN60A2 PE=2 SV=1//0
Cla004609	2509.46	1397.12	0.84491	0.0030006	0.01045	up	sp|O82179|GCSH2_ARATH Glycine cleavage system H protein 2, mitochondrial OS=Arabidopsis thaliana GN=GDH2 PE=2 SV=1//6.95997e-89
Cla004612	6916.41	2009.51	1.7832	3.3975e-10	4.7757e-09	up	sp|Q10KF0|PSA2_ORYSJ Proteasome subunit alpha type-2 OS=Oryza sativa subsp. japonica GN=PAB1 PE=2 SV=1//2.02882e-141
Cla004613	5701.27	1455.17	1.9701	7.7445e-12	1.353e-10	up	sp|Q9M4T8|PSA5_SOYBN Proteasome subunit alpha type-5 OS=Glycine max GN=PAE1 PE=2 SV=1//1.69324e-172
Cla004621	274.578	111.73	1.2972	0.013996	0.038761	up	sp|Q8RY46|AB26B_ARATH ABC transporter B family member 26, chloroplastic OS=Arabidopsis thaliana GN=ABCB26 PE=2 SV=1//0
Cla004625	14.4204	0	Inf	0.0056291	0.01787	up	-//-
Cla004626	201.587	3.91083	5.6878	6.0499e-05	0.00033659	up	sp|Q6NQK2|NAC8_ARATH NAC domain-containing protein 8 OS=Arabidopsis thaliana GN=NAC008 PE=2 SV=1//6.68623e-74
Cla004632	2677.81	1663.26	0.68704	0.016235	0.043919	up	-//-
Cla004639	1271	438.908	1.534	7.6908e-07	6.2406e-06	up	sp|Q9SCX9|GPDA1_ARATH Glycerol-3-phosphate dehydrogenase [NAD(+)] 1, chloroplastic OS=Arabidopsis thaliana GN=DHAPRD PE=1 SV=1//0
Cla004641	77.1026	0	Inf	0.00014298	0.00072256	up	-//-
Cla004643	599.646	329.309	0.86467	0.0072186	0.022072	up	sp|Q9LU68|CIA2_ARATH Protein CHLOROPLAST IMPORT APPARATUS 2 OS=Arabidopsis thaliana GN=CIA2 PE=2 SV=1//4.75495e-14
Cla004651	404.962	206.101	0.97444	0.0063532	0.019861	up	-//-
Cla004657	4740.3	2000.01	1.245	6.3873e-06	4.3476e-05	up	sp|Q0JHU5|ERG1_ORYSJ Elicitor-responsive protein 1 OS=Oryza sativa subsp. japonica GN=ERG1 PE=2 SV=1//2.40077e-49
Cla004660	2089.69	847.39	1.3022	0.008948	0.026539	up	-//-
Cla004675	27.5856	0	Inf	4.3925e-05	0.00025177	up	-//-
Cla004677	25048.7	2401.49	3.3827	2.7987e-29	2.5305e-27	up	sp|Q9LHA8|MD37C_ARATH Probable mediator of RNA polymerase II transcription subunit 37c OS=Arabidopsis thaliana GN=MED37C PE=1 SV=1//0
Cla004683	8794.25	2049.01	2.1016	1.0393e-08	1.1533e-07	up	sp|P22954|MD37D_ARATH Probable mediator of RNA polymerase II transcription subunit 37c OS=Arabidopsis thaliana GN=MED37D PE=1 SV=2//0
Cla004684	4489.88	1805.57	1.3142	1.3055e-05	8.3269e-05	up	sp|Q9ZV36|UXS6_ARATH UDP-glucuronic acid decarboxylase 6 OS=Arabidopsis thaliana GN=UXS6 PE=2 SV=1//0
Cla004685	3095.65	1026.69	1.5922	4.5141e-08	4.517e-07	up	sp|Q9M2T9|SYMM_ARATH Methionine--tRNA ligase, chloroplastic/mitochondrial OS=Arabidopsis thaliana GN=OVA1 PE=2 SV=1//0
Cla004686	1522.46	849.158	0.84229	0.010334	0.02995	up	sp|O04469|ECI1_ARATH Enoyl-CoA delta isomerase 1, peroxisomal OS=Arabidopsis thaliana GN=ECI1 PE=1 SV=1//4.49036e-92
Cla004698	604.915	135.78	2.1555	1.7691e-09	2.2334e-08	up	sp|O80634|PNSL1_ARATH Photosynthetic NDH subunit of lumenal location 1, chloroplastic OS=Arabidopsis thaliana GN=PNSL1 PE=1 SV=2//3.9379e-84
Cla004700	378.553	157.179	1.2681	0.0018517	0.0068958	up	sp|A9X1D0|SETD3_PAPAN Histone-lysine N-methyltransferase setd3 OS=Papio anubis GN=SETD3 PE=3 SV=1//4.66311e-17
Cla004704	306.941	163.6	0.90779	0.01561	0.04255	up	sp|P82538|PPL1_ARATH PsbP-like protein 1, chloroplastic OS=Arabidopsis thaliana GN=PPL1 PE=1 SV=1//1.08535e-49
Cla004713	1543.47	721.307	1.0975	0.00025424	0.0012028	up	-//-
Cla004714	1005	136.53	2.8799	8.4208e-17	2.5767e-15	up	-//-
Cla004726	1625.09	969.812	0.74474	0.010313	0.02991	up	sp|Q9SF32|IQD1_ARATH Protein IQ-DOMAIN 1 OS=Arabidopsis thaliana GN=IQD1 PE=1 SV=1//6.12581e-87
Cla004729	4996.92	1308.8	1.9328	4.5756e-11	7.2149e-10	up	sp|O49169|EF1A_MANES Elongation factor 1-alpha OS=Manihot esculenta GN=EF1 PE=3 SV=1//0
Cla004732	1961.03	919.825	1.0922	0.00016673	0.00082941	up	-//-
Cla004745	1305.91	733.457	0.83227	0.0053663	0.017169	up	sp|Q8LF05|RBL19_ARATH Rhomboid-like protein 19 OS=Arabidopsis thaliana GN=RBL19 PE=2 SV=1//5.77387e-132
Cla004746	1568.08	258.908	2.5985	1.4214e-16	4.2269e-15	up	sp|P12360|CB11_SOLLC Chlorophyll a-b binding protein 6A, chloroplastic OS=Solanum lycopersicum GN=CAB6A PE=2 SV=1//6.68785e-154
Cla004747	340.852	126.822	1.4263	0.00021781	0.0010502	up	sp|O76743|GLH4_CAEEL ATP-dependent RNA helicase glh-4 OS=Caenorhabditis elegans GN=glh-4 PE=1 SV=2//1.40222e-07
Cla004756	1735.37	879.003	0.9813	0.0055925	0.01778	up	-//-
Cla004786	99.082	16.8268	2.5579	9.5803e-05	0.0005058	up	sp|Q9XIK4|U202A_ARATH UPF0202 protein At1g10490 OS=Arabidopsis thaliana GN=At1g10490 PE=2 SV=2//6.56184e-30
Cla004795	3490.27	2054.31	0.76468	0.0071282	0.021841	up	-//-
Cla004837	1372.32	366.971	1.9029	1.4814e-09	1.8845e-08	up	sp|Q9FJP3|RK29_ARATH 50S ribosomal protein L29, chloroplastic OS=Arabidopsis thaliana GN=RPL29 PE=1 SV=1//6.33224e-58
Cla004847	3141.41	1423.81	1.1417	5.73e-05	0.00032083	up	sp|Q8VYN6|PFKA5_ARATH ATP-dependent 6-phosphofructokinase 5, chloroplastic OS=Arabidopsis thaliana GN=PFK5 PE=1 SV=1//0
Cla004848	2813.59	619.823	2.1825	0.00026687	0.0012564	up	sp|Q8LDD3|CUT1D_ARATH Protein CURVATURE THYLAKOID 1D, chloroplastic OS=Arabidopsis thaliana GN=CURT1D PE=1 SV=1//1.1383e-34
Cla004867	257.193	97.9262	1.3931	0.0010795	0.0043284	up	sp|Q9ZUZ3|SAU32_ARATH Auxin-responsive protein SAUR32 OS=Arabidopsis thaliana GN=SAUR32 PE=2 SV=1//2.51396e-28
Cla004871	3608.88	1971.81	0.87203	0.0018604	0.0069181	up	sp|A2Z3C4|6PGL4_ORYSI Probable 6-phosphogluconolactonase 4, chloroplastic OS=Oryza sativa subsp. indica GN=OsI_031067 PE=3 SV=2//4.7714e-127
Cla004874	2867.28	1583.39	0.85666	0.0028343	0.0099515	up	sp|Q7ZZ25|ATD1A_DANRE ATPase family AAA domain-containing protein 1-A OS=Danio rerio GN=atad1a PE=2 SV=2//3.17223e-96
Cla004885	4717.94	2964.81	0.67022	0.014212	0.03929	up	sp|Q9FJD4|IMB1_ARATH Importin subunit beta-1 OS=Arabidopsis thaliana GN=KPNB1 PE=1 SV=1//0
Cla004886	2173.46	1202.45	0.85402	0.0032511	0.011194	up	sp|Q9STP8|ACBP2_ARATH Acyl-CoA-binding domain-containing protein 2 OS=Arabidopsis thaliana GN=ACBP2 PE=1 SV=1//5.09474e-78
Cla004887	1039.51	562.852	0.88508	0.0040214	0.013449	up	sp|Q9STP8|ACBP2_ARATH Acyl-CoA-binding domain-containing protein 2 OS=Arabidopsis thaliana GN=ACBP2 PE=1 SV=1//4.27457e-42
Cla004897	8615.06	2524.05	1.7711	0.0012159	0.0047867	up	sp|Q9LV09|BOB1_ARATH Protein BOBBER 1 OS=Arabidopsis thaliana GN=BOB1 PE=1 SV=1//2.13046e-103
Cla004900	1865.36	876.412	1.0898	0.00022487	0.0010793	up	sp|Q8BTE0|SDHF4_MOUSE Succinate dehydrogenase assembly factor 4, mitochondrial OS=Mus musculus GN=Sdhaf4 PE=3 SV=2//1.54519e-11
Cla004901	302.931	35.3487	3.0993	5.2258e-12	9.3742e-11	up	sp|Q94BN2|SPSY_ARATH Spermine synthase OS=Arabidopsis thaliana GN=SPMS PE=1 SV=1//0
Cla004907	564.732	93.6929	2.5916	3.5315e-12	6.4975e-11	up	-//-
Cla004909	10906.1	1933.36	2.4959	1.9829e-17	6.3181e-16	up	sp|Q5NAZ9|SWT3B_ORYSJ Bidirectional sugar transporter SWEET3b OS=Oryza sativa subsp. japonica GN=SWEET3B PE=3 SV=2//9.34662e-42
Cla004917	1659.07	618.293	1.424	1.886e-06	1.4179e-05	up	-//-
Cla004918	1459.77	831.688	0.81163	0.0099904	0.029127	up	sp|Q94F27|B3GTB_ARATH Probable beta-1,3-galactosyltransferase 11 OS=Arabidopsis thaliana GN=B3GALT11 PE=2 SV=1//6.94581e-152
Cla004920	913.027	73.6429	3.632	4.4657e-08	4.4753e-07	up	sp|P17541|CHIA_CUCSA Acidic endochitinase OS=Cucumis sativus PE=1 SV=1//4.58519e-156
Cla004921	31.0871	2.42452	3.6805	0.0019561	0.0072111	up	sp|P17541|CHIA_CUCSA Acidic endochitinase OS=Cucumis sativus PE=1 SV=1//1.92929e-165
Cla004924	503.266	110.831	2.183	3.2312e-09	3.8885e-08	up	-//-
Cla004928	2112.37	1227.31	0.78337	0.0073259	0.022342	up	sp|O05525|YDIL_BACSU Putative membrane peptidase YdiL OS=Bacillus subtilis (strain 168) GN=ydiL PE=3 SV=1//1.50643e-06
Cla004930	189.108	2.82635	6.0641	3.7135e-05	0.00021662	up	sp|Q9FLV9|SLAH3_ARATH S-type anion channel SLAH3 OS=Arabidopsis thaliana GN=SLAH3 PE=1 SV=1//0
Cla004935	991.064	555.613	0.8349	0.0076292	0.02314	up	sp|Q557G3|TPPC1_DICDI Trafficking protein particle complex subunit 1 OS=Dictyostelium discoideum GN=trappc1-1 PE=3 SV=1//1.46526e-33
Cla004939	1199.24	591.879	1.0187	0.00089916	0.0036932	up	-//-
Cla004940	2487.91	1468.99	0.76012	0.015674	0.042678	up	sp|Q6L440|R1A3_SOLDE Putative late blight resistance protein homolog R1A-3 OS=Solanum demissum GN=R1A-3 PE=5 SV=2//4.01152e-07
Cla004941	1906.81	882.799	1.111	0.00029811	0.0013826	up	sp|Q8H0W3|RVE6_ARATH Protein REVEILLE 6 OS=Arabidopsis thaliana GN=RVE6 PE=2 SV=1//1.65898e-107
Cla004946	7152.47	4175.21	0.77659	0.0047146	0.015381	up	sp|Q9FYR7|SCL8_ARATH Scarecrow-like protein 8 OS=Arabidopsis thaliana GN=SCL8 PE=2 SV=1//5.9764e-155
Cla004949	191.594	4.24372	5.4966	0.0001858	0.00091389	up	sp|Q9LYT3|TT12_ARATH Protein TRANSPARENT TESTA 12 OS=Arabidopsis thaliana GN=TT12 PE=2 SV=1//1.66682e-97
Cla004950	461.27	219.64	1.0705	0.0024321	0.0087068	up	sp|A9IVX6|RS9_BART1 30S ribosomal protein S9 OS=Bartonella tribocorum (strain CIP 105476 / IBS 506) GN=rpsI PE=3 SV=1//5.45393e-40
Cla004951	365.048	171.616	1.0889	0.0033955	0.011617	up	-//-
Cla004952	24.1274	0	Inf	0.00014046	0.00071124	up	-//-
Cla004970	8172.86	584.682	3.8051	9.5054e-35	1.2553e-32	up	sp|Q9FGJ6|ATL79_ARATH RING-H2 finger protein ATL79 OS=Arabidopsis thaliana GN=ATL79 PE=2 SV=1//7.19854e-31
Cla004971	2503.44	956.737	1.3877	1.5635e-06	1.1933e-05	up	-//-
Cla004972	2023.02	190.572	3.4081	1.8786e-12	3.5778e-11	up	sp|Q9CAI3|CADH1_ARATH Probable cinnamyl alcohol dehydrogenase 1 OS=Arabidopsis thaliana GN=CAD1 PE=2 SV=1//4.19943e-107
Cla004978	1420.05	815.845	0.79958	0.0060764	0.019109	up	-//-
Cla004983	2024.31	867.366	1.2227	3.2703e-05	0.00019273	up	sp|Q9MAP3|RK11_ARATH 50S ribosomal protein L11, chloroplastic OS=Arabidopsis thaliana GN=RPL11 PE=2 SV=1//1.72298e-51
Cla004985	694.165	389.687	0.83296	0.0086764	0.025832	up	sp|Q9MAP8|B3GT6_ARATH Probable beta-1,3-galactosyltransferase 6 OS=Arabidopsis thaliana GN=B3GALT6 PE=2 SV=1//0
Cla004987	721.959	176.076	2.0357	1.4661e-08	1.5882e-07	up	-//-
Cla005005	7269.15	4260.61	0.77073	0.005353	0.017144	up	sp|Q39096|ERD15_ARATH Protein EARLY RESPONSIVE TO DEHYDRATION 15 OS=Arabidopsis thaliana GN=ERD15 PE=1 SV=1//1.09236e-23
Cla005024	182.252	21.0892	3.1114	5.668e-09	6.5237e-08	up	sp|Q5TM68|MDC1_MACMU Mediator of DNA damage checkpoint protein 1 OS=Macaca mulatta GN=MDC1 PE=3 SV=1//3.80709e-20
Cla005033	29472.7	9709.34	1.6019	6.875e-09	7.8055e-08	up	sp|F4K0E8|ISPG_ARATH 4-hydroxy-3-methylbut-2-en-1-yl diphosphate synthase (ferredoxin), chloroplastic OS=Arabidopsis thaliana GN=ISPG PE=1 SV=1//0
Cla005036	4108.09	1650.02	1.316	0.0019576	0.0072154	up	-//-
Cla005042	2393.55	101.837	4.5548	6.9997e-13	1.3967e-11	up	sp|Q8LEE9|FLA12_ARATH Fasciclin-like arabinogalactan protein 12 OS=Arabidopsis thaliana GN=FLA12 PE=2 SV=2//1.33093e-50
Cla005050	3101.23	876.168	1.8236	5.8437e-10	7.8462e-09	up	-//-
Cla005054	1028.35	368.2	1.4818	1.5114e-05	9.5402e-05	up	sp|P0CE10|Y4102_ARATH Putative uncharacterized protein At4g01020, chloroplastic OS=Arabidopsis thaliana GN=At4g01020 PE=3 SV=1//3.31555e-14
Cla005058	390.762	144.4	1.4362	0.00011785	0.00060876	up	sp|Q9LSS5|ICR3_ARATH Interactor of constitutive active ROPs 3 OS=Arabidopsis thaliana GN=ICR3 PE=1 SV=1//3.44378e-96
Cla005061	1977.33	614.674	1.6857	2.7629e-08	2.8602e-07	up	sp|Q6NMM8|F8H_ARATH Probable glucuronoxylan glucuronosyltransferase F8H OS=Arabidopsis thaliana GN=F8H PE=2 SV=1//9.69138e-179
Cla005062	3033.14	768.523	1.9807	2.0757e-11	3.4293e-10	up	sp|P25864|RK9_ARATH 50S ribosomal protein L9, chloroplastic OS=Arabidopsis thaliana GN=RPL9 PE=2 SV=1//7.60958e-44
Cla005064	371.475	69.2865	2.4226	2.7042e-05	0.00016214	up	sp|F4I9E1|NFD4_ARATH Protein NUCLEAR FUSION DEFECTIVE 4 OS=Arabidopsis thaliana GN=NFD4 PE=3 SV=1//1.39532e-27
Cla005077	1720.82	73.9385	4.5406	2.9593e-11	4.7943e-10	up	-//-
Cla005092	5551.46	2570.89	1.1106	6.6526e-05	0.00036626	up	sp|O49818|LGUL_CICAR Lactoylglutathione lyase OS=Cicer arietinum PE=2 SV=1//1.14047e-113
Cla005109	4601.63	2403.4	0.93707	0.00075098	0.0031569	up	sp|Q9S850|SUOX_ARATH Sulfite oxidase OS=Arabidopsis thaliana GN=SOX PE=1 SV=1//1.27467e-84
Cla005116	19546.5	3534.85	2.4672	1.336e-16	3.9849e-15	up	sp|Q5RC94|NBR1_PONAB Next to BRCA1 gene 1 protein OS=Pongo abelii GN=NBR1 PE=2 SV=1//3.81393e-15
Cla005118	2297.85	364.369	2.6568	2.4984e-13	5.2241e-12	up	sp|Q5JME8|DI195_ORYSJ Protein DEHYDRATION-INDUCED 19 homolog 5 OS=Oryza sativa subsp. japonica GN=DI19-5 PE=2 SV=1//1.02371e-29
Cla005120	248.262	51.1884	2.278	4.7486e-07	4.0185e-06	up	-//-
Cla005122	217.877	39.5215	2.4628	2.7128e-07	2.3999e-06	up	sp|Q8H5F8|ADPRM_ORYSJ Manganese-dependent ADP-ribose/CDP-alcohol diphosphatase OS=Oryza sativa subsp. japonica GN=Os07g0688000 PE=2 SV=1//1.99675e-155
Cla005123	3546.49	1674.63	1.0826	0.0001163	0.00060183	up	sp|Q9FGS4|NADA_ARATH Quinolinate synthase, chloroplastic OS=Arabidopsis thaliana GN=QS PE=1 SV=1//0
Cla005127	21995.2	7474.04	1.5572	9.1393e-09	1.0209e-07	up	sp|P24465|C71A1_PERAE Cytochrome P450 71A1 OS=Persea americana GN=CYP71A1 PE=1 SV=2//3.17622e-166
Cla005130	5762.02	1560.41	1.8847	5.9402e-11	9.2937e-10	up	sp|Q9MA15|Y1796_ARATH Uncharacterized aarF domain-containing protein kinase At1g79600, chloroplastic OS=Arabidopsis thaliana GN=At1g79600 PE=2 SV=1//0
Cla005133	5834.68	1274.11	2.1952	6.2348e-12	1.1017e-10	up	sp|Q8L7S8|RH3_ARATH DEAD-box ATP-dependent RNA helicase 3, chloroplastic OS=Arabidopsis thaliana GN=RH3 PE=1 SV=2//0
Cla005143	432.844	21.607	4.3243	0.00036533	0.001658	up	-//-
Cla005148	7356.66	3689.97	0.99544	0.00034426	0.0015695	up	sp|Q2QZ86|ACLA2_ORYSJ ATP-citrate synthase alpha chain protein 2 OS=Oryza sativa subsp. japonica GN=ACLA-2 PE=2 SV=2//0
Cla005151	12311.4	6689.81	0.87996	0.0011618	0.0046015	up	sp|P43289|KSG3_ARATH Shaggy-related protein kinase gamma OS=Arabidopsis thaliana GN=ASK3 PE=2 SV=1//0
Cla005152	2886.74	974.319	1.567	4.5021e-08	4.5073e-07	up	sp|Q0JP11|C3H3_ORYSJ Zinc finger CCCH domain-containing protein 3 OS=Oryza sativa subsp. japonica GN=Os01g0252200 PE=2 SV=2//3.89186e-26
Cla005157	2624.82	1592.96	0.72051	0.01203	0.034162	up	sp|A4IF69|NHLC2_BOVIN NHL repeat-containing protein 2 OS=Bos taurus GN=NHLRC2 PE=2 SV=1//3.40014e-123
Cla005181	948.642	180.324	2.3953	9.486e-13	1.8631e-11	up	sp|Q9FJ10|GAT16_ARATH GATA transcription factor 16 OS=Arabidopsis thaliana GN=GATA16 PE=2 SV=1//2.79786e-18
Cla005192	2861.44	1494.32	0.93725	0.001063	0.0042761	up	sp|Q9ZQX4|VATF_ARATH V-type proton ATPase subunit F OS=Arabidopsis thaliana GN=VHA-F PE=2 SV=1//2.90173e-78
Cla005194	4164.81	807.424	2.3669	1.5211e-15	4.0804e-14	up	-//-
Cla005197	6995.66	2143.45	1.7065	2.1625e-05	0.00013198	up	sp|Q9XFR5|SR30_ARATH Serine/arginine-rich splicing factor SR30 OS=Arabidopsis thaliana GN=SR30 PE=1 SV=1//8.91595e-94
Cla005200	1241.32	397.537	1.6427	0.0082441	0.024714	up	sp|Q5J907|TCTP_ELAGV Translationally-controlled tumor protein homolog OS=Elaeis guineensis var. tenera GN=TCTP PE=2 SV=1//1.07614e-93
Cla005201	5387.54	1792.05	1.588	2.1004e-08	2.2132e-07	up	sp|Q9SEI2|PS6AA_ARATH 26S protease regulatory subunit 6A homolog A OS=Arabidopsis thaliana GN=RPT5A PE=1 SV=1//0
Cla005202	3125.41	1340.29	1.2215	3.0544e-05	0.00018097	up	sp|P36181|HSP80_SOLLC Heat shock cognate protein 80 OS=Solanum lycopersicum GN=HSC80 PE=2 SV=1//0
Cla005204	690.246	81.407	3.0839	2.9746e-05	0.00017702	up	sp|P36181|HSP80_SOLLC Heat shock cognate protein 80 OS=Solanum lycopersicum GN=HSC80 PE=2 SV=1//0
Cla005206	492.422	39.6157	3.6357	0.0029241	0.010224	up	sp|P36181|HSP80_SOLLC Heat shock cognate protein 80 OS=Solanum lycopersicum GN=HSC80 PE=2 SV=1//0
Cla005210	17291	2362.97	2.8713	1.3105e-22	7.1097e-21	up	sp|P34913|HYES_HUMAN Bifunctional epoxide hydrolase 2 OS=Homo sapiens GN=EPHX2 PE=1 SV=2//5.25313e-50
Cla005222	17429.8	1759.81	3.3081	2.3648e-28	1.9615e-26	up	sp|Q9MA63|Y3550_ARATH REF/SRPP-like protein At3g05500 OS=Arabidopsis thaliana GN=At3g05500 PE=1 SV=1//2.83103e-99
Cla005262	245.732	53.9224	2.1881	1.0147e-06	8.0413e-06	up	-//-
Cla005277	29.5973	2.66324	3.4742	0.0061078	0.019198	up	sp|Q39649|2SS_CUCMA 2S albumin OS=Cucurbita maxima PE=1 SV=1//2.59696e-49
Cla005294	441.95	165.989	1.4128	9.4183e-05	0.00049817	up	sp|Q8VY88|LTD_ARATH Protein LHCP TRANSLOCATION DEFECT OS=Arabidopsis thaliana GN=LTD PE=1 SV=1//2.90971e-71
Cla005298	15092.1	7581.27	0.99328	0.00072161	0.0030469	up	-//-
Cla005304	837.268	433.962	0.94812	0.0031575	0.010918	up	sp|Q94AM9|CID4_ARATH Polyadenylate-binding protein-interacting protein 4 OS=Arabidopsis thaliana GN=CID4 PE=2 SV=1//6.18369e-11
Cla005306	1247.67	548.242	1.1864	0.00010838	0.00056625	up	-//-
Cla005307	231.484	83.7139	1.4674	0.0008053	0.0033572	up	sp|Q42670|PLSC_COCNU 1-acyl-sn-glycerol-3-phosphate acyltransferase OS=Cocos nucifera PE=1 SV=1//2.44207e-146
Cla005320	14199.3	4048.11	1.8105	1.0658e-10	1.6026e-09	up	sp|B9HTL5|CSPLC_POPTR CASP-like protein 2D1 OS=Populus trichocarpa GN=POPTRDRAFT_833824 PE=3 SV=1//2.89661e-49
Cla005332	2826.58	883.24	1.6782	0.00017313	0.00085871	up	sp|Q43087|PYRB2_PEA Aspartate carbamoyltransferase 2, chloroplastic OS=Pisum sativum GN=PYRB2 PE=2 SV=1//0
Cla005337	892.396	16.5999	5.7484	5.534e-42	9.9183e-40	up	sp|Q9ZU91|E133_ARATH Glucan endo-1,3-beta-glucosidase 3 OS=Arabidopsis thaliana GN=At2g01630 PE=1 SV=2//7.73167e-114
Cla005340	1491.69	629.921	1.2437	8.2711e-05	0.00044643	up	sp|A4YJR1|GRPE_BRASO Protein GrpE OS=Bradyrhizobium sp. (strain ORS278) GN=grpE PE=3 SV=1//5.04476e-37
Cla005341	555.929	167.528	1.7305	0.0055215	0.01759	up	sp|Q8S9L5|TIG_ARATH Trigger factor-like protein TIG, Chloroplastic OS=Arabidopsis thaliana GN=TIG PE=2 SV=1//0
Cla005343	612.748	342.399	0.83962	0.0118	0.033596	up	-//-
Cla005344	6148.52	1177.42	2.3846	1.6378e-11	2.7283e-10	up	sp|P21357|AROF_SOLTU Phospho-2-dehydro-3-deoxyheptonate aldolase 1, chloroplastic OS=Solanum tuberosum GN=SHKA PE=1 SV=2//0
Cla005352	1232.98	662.539	0.89607	0.0030382	0.010553	up	sp|Q3T0G5|PROSC_BOVIN Proline synthase co-transcribed bacterial homolog protein OS=Bos taurus GN=PROSC PE=2 SV=1//4.52769e-72
Cla005356	29.7305	0.652358	5.5101	0.00021243	0.0010265	up	-//-
Cla005359	981.627	509.652	0.94566	0.0024149	0.0086575	up	sp|Q42545|FTSZ1_ARATH Cell division protein FtsZ homolog 1, chloroplastic OS=Arabidopsis thaliana GN=FTSZ1 PE=1 SV=2//0
Cla005387	433.331	177.82	1.2851	0.0049687	0.016099	up	sp|Q9MAH4|AB10G_ARATH ABC transporter G family member 10 OS=Arabidopsis thaliana GN=ABCG10 PE=3 SV=1//0
Cla005395	1120.98	557.909	1.0067	0.0010211	0.0041291	up	sp|P93847|RL10_SOLME 60S ribosomal protein L10 OS=Solanum melongena GN=RPL10 PE=2 SV=1//2.58323e-71
Cla005402	864.381	0	Inf	6.7506e-15	1.6959e-13	up	sp|Q6H9K0|PGLR2_PLAAC Exopolygalacturonase (Fragment) OS=Platanus acerifolia GN=plaa2 PE=1 SV=1//6.14979e-113
Cla005403	8649.11	3908.81	1.1458	2.8863e-05	0.00017217	up	sp|Q9LRR6|CID9_ARATH Polyadenylate-binding protein-interacting protein 9 OS=Arabidopsis thaliana GN=CID9 PE=3 SV=1//2.12418e-119
Cla005404	13627.4	3966.44	1.7806	0.013476	0.03758	up	sp|Q9M6E8|NCED1_PHAVU 9-cis-epoxycarotenoid dioxygenase NCED1, chloroplastic OS=Phaseolus vulgaris GN=NCED1 PE=2 SV=1//0
Cla005407	5871.81	3200.38	0.87556	0.0016902	0.0063786	up	sp|Q9FPS2|UBP25_ARATH Ubiquitin carboxyl-terminal hydrolase 25 OS=Arabidopsis thaliana GN=UBP25 PE=2 SV=1//0
Cla005408	73813.3	1179.91	5.9671	4.5975e-25	3.0458e-23	up	sp|P49332|GSTXC_TOBAC Probable glutathione S-transferase parC OS=Nicotiana tabacum GN=PARC PE=2 SV=1//2.71615e-116
Cla005410	705.125	279.412	1.3355	0.012764	0.03592	up	sp|Q03666|GSTX4_TOBAC Probable glutathione S-transferase OS=Nicotiana tabacum PE=2 SV=1//2.35081e-107
Cla005412	65.9762	2.73895	4.5903	3.0858e-05	0.00018277	up	sp|Q9C8M5|WAG1_ARATH Serine/threonine-protein kinase WAG1 OS=Arabidopsis thaliana GN=WAG1 PE=2 SV=1//9.55584e-162
Cla005419	360.337	167.078	1.1088	0.0029047	0.010174	up	-//-
Cla005420	13669.6	8651.21	0.66	0.015116	0.041355	up	sp|Q40519|PSBR_TOBAC Photosystem II 10 kDa polypeptide, chloroplastic OS=Nicotiana tabacum GN=PSBR PE=2 SV=1//8.55425e-57
Cla005429	17434.5	3879.12	2.1681	1.9169e-14	4.5644e-13	up	sp|Q9SLQ8|PSBP_CUCSA Oxygen-evolving enhancer protein 2, chloroplastic OS=Cucumis sativus GN=PSBP PE=2 SV=1//4.99594e-174
Cla005449	1142.83	679.535	0.74999	0.013941	0.038645	up	sp|Q8CG07|WRIP1_RAT ATPase WRNIP1 OS=Rattus norvegicus GN=Wrnip1 PE=2 SV=1//2.27469e-140
Cla005450	3409.72	1910.89	0.83541	0.0023513	0.008444	up	sp|P35055|HEM6_SOYBN Oxygen-dependent coproporphyrinogen-III oxidase, chloroplastic OS=Glycine max GN=CPX PE=2 SV=1//0
Cla005451	1491.89	565.052	1.4007	3.8462e-06	2.7407e-05	up	sp|Q07512|FLS_PETHY Flavonol synthase/flavanone 3-hydroxylase OS=Petunia hybrida GN=FL PE=2 SV=1//1.5035e-62
Cla005456	15610.6	9398.6	0.73201	0.0085875	0.025606	up	-//-
Cla005462	6001.03	3824.83	0.64982	0.017544	0.046949	up	sp|Q9FH80|BAM8_ARATH Beta-amylase 8 OS=Arabidopsis thaliana GN=BAM8 PE=2 SV=1//0
Cla005471	3564.51	2057.66	0.7927	0.0052795	0.016945	up	sp|Q6GME1|PYRG2_XENLA CTP synthase 2 OS=Xenopus laevis GN=ctps2 PE=2 SV=1//0
Cla005473	1362.53	724.17	0.91189	0.0026289	0.0093101	up	-//-
Cla005495	2577.5	889.138	1.5355	1.7593e-07	1.5979e-06	up	sp|Q9LTV6|DECR2_ARATH Peroxisomal 2,4-dienoyl-CoA reductase OS=Arabidopsis thaliana GN=At3g12800 PE=2 SV=1//4.92961e-161
Cla005507	512.635	65.5236	2.9678	2.6135e-14	6.143e-13	up	sp|Q8LBW3|LBD12_ARATH LOB domain-containing protein 12 OS=Arabidopsis thaliana GN=LBD12 PE=2 SV=2//1.29883e-49
Cla005511	377.295	163.739	1.2043	0.0015742	0.0059983	up	-//-
Cla005514	3342.4	848.701	1.9776	1.2899e-11	2.1794e-10	up	sp|Q9SJG2|Y2296_ARATH Probable receptor-like protein kinase At2g42960 OS=Arabidopsis thaliana GN=At2g42960 PE=3 SV=1//0
Cla005516	316.696	80.6911	1.9726	1.5288e-06	1.1691e-05	up	-//-
Cla005531	632.066	189.355	1.739	4.9045e-07	4.1365e-06	up	sp|P38812|GEP4_YEAST Phosphatidylglycerophosphatase GEP4, mitochondrial OS=Saccharomyces cerevisiae (strain ATCC 204508 / S288c) GN=GEP4 PE=1 SV=1//2.32694e-12
Cla005532	40.4817	8.30746	2.2848	0.017831	0.047563	up	sp|Q6WG30|T5H_TAXCU Taxadiene 5-alpha hydroxylase OS=Taxus cuspidata PE=1 SV=2//2.09454e-110
Cla005539	3810.59	2333.99	0.70722	0.012743	0.035875	up	sp|Q9XGM1|VATD_ARATH V-type proton ATPase subunit D OS=Arabidopsis thaliana GN=VHA-D PE=1 SV=2//1.0063e-161
Cla005540	1349.66	603.114	1.1621	0.00011271	0.00058507	up	sp|Q9LI77|GATA_ARATH Glutamyl-tRNA(Gln) amidotransferase subunit A, chloroplastic/mitochondrial OS=Arabidopsis thaliana GN=GATA PE=2 SV=1//0
Cla005543	62.2953	4.80522	3.6964	3.0076e-05	0.00017856	up	sp|Q6DR10|TBL43_ARATH Protein trichome birefringence-like 43 OS=Arabidopsis thaliana GN=TBL43 PE=2 SV=1//1.21629e-146
Cla005544	7359.48	4745.25	0.63312	0.018327	0.048707	up	sp|Q4UKR8|HSPC2_RICFE Small heat shock protein C2 OS=Rickettsia felis (strain ATCC VR-1525 / URRWXCal2) GN=hspC2 PE=3 SV=1//1.71644e-15
Cla005548	1258.18	757.719	0.7316	0.014397	0.039718	up	sp|Q54HW1|PSD10_DICDI 26S proteasome non-ATPase regulatory subunit 10 OS=Dictyostelium discoideum GN=psmD10 PE=2 SV=1//5.47405e-08
Cla005552	919.975	514.874	0.83737	0.0068372	0.021105	up	-//-
Cla005555	3980.71	1721.11	1.2097	2.476e-05	0.00014948	up	sp|Q7RTR2|NLRC3_HUMAN Protein NLRC3 OS=Homo sapiens GN=NLRC3 PE=2 SV=2//5.10012e-26
Cla005558	5432.65	1443.9	1.9117	3.2e-11	5.1593e-10	up	-//-
Cla005564	1174.47	591.742	0.98897	0.0013152	0.0051271	up	sp|Q9C4Z7|MINE1_ARATH Cell division topological specificity factor homolog, chloroplastic OS=Arabidopsis thaliana GN=MINE1 PE=1 SV=1//2.50738e-71
Cla005565	2963.6	1553	0.93229	0.0021077	0.007677	up	sp|O80605|SUC3_ARATH Sucrose transport protein SUC3 OS=Arabidopsis thaliana GN=SUC3 PE=1 SV=1//0
Cla005570	1508.49	676.307	1.1574	0.003019	0.010503	up	sp|Q6R8G7|PHO13_ARATH Phosphate transporter PHO1 homolog 3 OS=Arabidopsis thaliana GN=PHO1;H3 PE=2 SV=2//0
Cla005572	1259.52	273.768	2.2018	8.9795e-12	1.5512e-10	up	sp|P94026|RBCMT_TOBAC Ribulose-1,5 bisphosphate carboxylase/oxygenase large subunit N-methyltransferase, chloroplastic OS=Nicotiana tabacum GN=RBCMT PE=2 SV=1//0
Cla005575	2348.42	1425.32	0.7204	0.013063	0.036596	up	sp|Q6DBN1|Y4845_ARATH BTB/POZ domain-containing protein At4g08455 OS=Arabidopsis thaliana GN=At4g08455 PE=1 SV=1//1.00486e-125
Cla005582	1346.08	772.173	0.80177	0.0075932	0.023055	up	sp|Q8W206|CSN6A_ARATH COP9 signalosome complex subunit 6a OS=Arabidopsis thaliana GN=CSN6A PE=1 SV=2//7.45903e-99
Cla005583	4217.46	1717.33	1.2962	6.4321e-06	4.3752e-05	up	sp|P42762|CLPD_ARATH Chaperone protein ClpD, chloroplastic OS=Arabidopsis thaliana GN=CLPD PE=1 SV=1//3.16781e-83
Cla005587	1259.49	657.816	0.93708	0.0020579	0.0075243	up	sp|B3GS44|LRE_ARATH GPI-anchored protein LORELEI OS=Arabidopsis thaliana GN=LRE PE=2 SV=1//2.70175e-39
Cla005589	2017.44	1177.83	0.77639	0.0076635	0.023233	up	sp|Q0WLR1|QKIL1_ARATH KH domain-containing protein At4g26480 OS=Arabidopsis thaliana GN=At4g26480 PE=2 SV=1//1.89649e-54
Cla005592	1985.81	740.645	1.4229	1.6098e-06	1.2245e-05	up	sp|A1DCU5|DDI1_NEOFI DNA damage-inducible protein 1 OS=Neosartorya fischeri (strain ATCC 1020 / DSM 3700 / FGSC A1164 / NRRL 181) GN=ddi1 PE=3 SV=1//4.39418e-84
Cla005596	1923.45	657.344	1.549	1.9373e-07	1.747e-06	up	-//-
Cla005597	4651.37	1961.61	1.2456	1.1447e-05	7.3763e-05	up	sp|Q8LB10|CLPR4_ARATH ATP-dependent Clp protease proteolytic subunit-related protein 4, chloroplastic OS=Arabidopsis thaliana GN=CLPR4 PE=1 SV=1//1.90165e-145
Cla005603	5543.19	1928.87	1.523	2.942e-06	2.142e-05	up	sp|Q05737|YPTM2_MAIZE GTP-binding protein YPTM2 OS=Zea mays GN=YPTM2 PE=2 SV=1//2.96766e-133
Cla005604	689.174	250.635	1.4593	1.0333e-05	6.7103e-05	up	-//-
Cla005606	6224.82	2499.09	1.3166	3.2466e-06	2.34e-05	up	sp|Q8W463|RK191_ARATH 50S ribosomal protein L19-1, chloroplastic OS=Arabidopsis thaliana GN=At4g17560 PE=2 SV=1//2.58087e-55
Cla005612	1686.51	1034.71	0.70482	0.015021	0.041151	up	sp|Q2TBG8|UCHL3_BOVIN Ubiquitin carboxyl-terminal hydrolase isozyme L3 OS=Bos taurus GN=UCHL3 PE=2 SV=1//8.21795e-27
Cla005617	2302	198.587	3.535	7.2496e-28	5.8208e-26	up	sp|Q20390|PPT1_CAEEL Palmitoyl-protein thioesterase 1 OS=Caenorhabditis elegans GN=ppt-1 PE=2 SV=2//3.12999e-38
Cla005619	1627.65	379.286	2.1014	1.5371e-11	2.5712e-10	up	-//-
Cla005637	1600.2	758.953	1.0762	0.00032218	0.0014809	up	sp|O48593|SYNO_ARATH Asparagine--tRNA ligase, chloroplastic/mitochondrial OS=Arabidopsis thaliana GN=SYNO PE=2 SV=3//0
Cla005645	16943.8	825.837	4.3588	2.3013e-23	1.2995e-21	up	sp|P11890|HS23C_OXYRB Small heat shock protein, chloroplastic OS=Oxybasis rubra GN=HSP23 PE=2 SV=1//1.19148e-48
Cla005670	193.545	23.5002	3.0419	0.0037942	0.012789	up	sp|Q9SZJ2|GRDP2_ARATH Glycine-rich domain-containing protein 2 OS=Arabidopsis thaliana GN=GRDP2 PE=2 SV=1//2.8622e-128
Cla005671	1500.62	837.521	0.84136	0.0039836	0.013341	up	sp|Q9SXD5|GSXL3_ARATH Flavin-containing monooxygenase FMO GS-OX-like 3 OS=Arabidopsis thaliana GN=At1g62620 PE=2 SV=2//0
Cla005675	77.5685	10.7269	2.8542	0.00013416	0.0006828	up	sp|Q9SUW0|TPPG_ARATH Probable trehalose-phosphate phosphatase G OS=Arabidopsis thaliana GN=TPPG PE=2 SV=1//0
Cla005689	768.443	419.713	0.87253	0.0065735	0.020438	up	sp|Q8L733|Y4121_ARATH Putative transferase At4g12130, mitochondrial OS=Arabidopsis thaliana GN=At4g12130 PE=1 SV=1//6.47435e-165
Cla005690	943.938	388.73	1.2799	4.1917e-05	0.00024164	up	sp|Q8R035|ICT1_MOUSE Peptidyl-tRNA hydrolase ICT1, mitochondrial OS=Mus musculus GN=Ict1 PE=1 SV=1//1.34622e-27
Cla005693	7240.25	2593.44	1.4812	1.73e-07	1.5749e-06	up	-//-
Cla005720	248.314	45.7206	2.4412	1.1785e-07	1.1013e-06	up	-//-
Cla005725	54.1547	0	Inf	0.0063105	0.01974	up	-//-
Cla005756	4399.5	2337.24	0.91253	0.001034	0.0041735	up	sp|P31828|PQQL_ECOLI Probable zinc protease PqqL OS=Escherichia coli (strain K12) GN=pqqL PE=3 SV=2//2.99974e-27
Cla005777	79868.7	1052.55	6.2457	4.5848e-05	0.00026167	up	sp|P26413|HSP70_SOYBN Heat shock 70 kDa protein OS=Glycine max GN=HSP70 PE=3 SV=1//0
Cla005807	4089.23	2284.1	0.8402	0.0030069	0.010466	up	sp|Q9SIT1|TMK3_ARATH Receptor-like kinase TMK3 OS=Arabidopsis thaliana GN=TMK3 PE=2 SV=1//0
Cla005821	1722.11	929.426	0.88976	0.0023513	0.008444	up	sp|Q940S0|TMN2_ARATH Transmembrane 9 superfamily member 2 OS=Arabidopsis thaliana GN=TMN2 PE=2 SV=1//0
Cla005830	1975.5	48.7156	5.3417	0.0010874	0.0043526	up	-//-
Cla005839	729.264	319.674	1.1898	0.00027419	0.0012845	up	sp|Q9LS48|SG1_ARATH protein SLOW GREEN 1, chloroplastic OS=Arabidopsis thaliana GN=SG1 PE=1 SV=1//2.99388e-127
Cla005852	6625.34	2884.08	1.1999	1.7793e-05	0.0001103	up	sp|Q949X9|LPR2_ARATH Multicopper oxidase LPR2 OS=Arabidopsis thaliana GN=LPR2 PE=2 SV=1//0
Cla005862	2811.91	1333.48	1.0764	0.00020952	0.0010139	up	sp|P55826|PPOC_ARATH Protoporphyrinogen oxidase 1, chloroplastic OS=Arabidopsis thaliana GN=PPOX1 PE=1 SV=1//0
Cla005871	10857.6	2134.24	2.3469	5.9063e-16	1.6535e-14	up	sp|P51819|HSP83_IPONI Heat shock protein 83 OS=Ipomoea nil GN=HSP83A PE=2 SV=1//0
Cla005878	60.1004	11.672	2.3643	0.0029467	0.010292	up	-//-
Cla005882	1018.65	534.537	0.9303	0.0024675	0.0088196	up	-//-
Cla005896	1822.94	816.915	1.158	0.00024991	0.001185	up	sp|Q8H9D2|NQR_SOLTU NAD(P)H:quinone oxidoreductase OS=Solanum tuberosum PE=2 SV=1//8.67592e-90
Cla005898	534.764	168.015	1.6703	3.0799e-06	2.2335e-05	up	-//-
Cla005905	115.741	0	Inf	9.7834e-06	6.3989e-05	up	sp|Q8VY22|TBL38_ARATH Protein trichome birefringence-like 38 OS=Arabidopsis thaliana GN=TBL38 PE=2 SV=1//1.16616e-141
Cla005909	1015	363.808	1.4802	3.205e-06	2.3143e-05	up	-//-
Cla005911	717.38	284.975	1.3319	6.1848e-05	0.00034323	up	-//-
Cla005919	1425.21	254.734	2.4841	0.00022448	0.001078	up	sp|Q8S0G4|GPDH1_ORYSJ Probable glycerol-3-phosphate dehydrogenase [NAD(+)] 1, cytosolic OS=Oryza sativa subsp. japonica GN=Os01g0939600 PE=2 SV=1//0
Cla005926	3760.71	1969.14	0.93344	0.00080895	0.0033704	up	sp|P51132|UCRI2_TOBAC Cytochrome b-c1 complex subunit Rieske-2, mitochondrial OS=Nicotiana tabacum PE=2 SV=1//3.2222e-141
Cla005927	707.854	180.885	1.9684	1.0986e-08	1.2126e-07	up	sp|Q9LSE4|CCB1_ARATH Protein COFACTOR ASSEMBLY OF COMPLEX C SUBUNIT B CCB1, chloroplastic OS=Arabidopsis thaliana GN=CCB1 PE=1 SV=1//9.89888e-100
Cla005935	641.868	220.453	1.5418	0.0099194	0.028953	up	sp|D1MI46|C76BA_SWEMU Geraniol 8-hydroxylase OS=Swertia mussotii GN=CYP76B10 PE=1 SV=1//4.01166e-168
Cla005941	3734.15	1519.91	1.2968	6.914e-06	4.6729e-05	up	sp|Q7XJ98|KATAM_ARATH Xyloglucan galactosyltransferase KATAMARI1 OS=Arabidopsis thaliana GN=KAM1 PE=1 SV=1//0
Cla005945	4457.57	1853.79	1.2658	5.3293e-06	3.6863e-05	up	sp|Q38829|IAA11_ARATH Auxin-responsive protein IAA11 OS=Arabidopsis thaliana GN=IAA11 PE=1 SV=1//4.42419e-43
Cla005948	854.519	283.88	1.5898	1.3428e-06	1.0391e-05	up	sp|P42620|YQJG_ECOLI Glutathionyl-hydroquinone reductase YqjG OS=Escherichia coli (strain K12) GN=yqjG PE=1 SV=1//1.7481e-66
Cla005956	465.968	204.929	1.1851	0.00074633	0.0031402	up	sp|F4I443|BARD1_ARATH BRCA1-associated RING domain protein 1 OS=Arabidopsis thaliana GN=BARD1 PE=1 SV=1//2.26937e-16
Cla005958	3664.18	1884.79	0.95908	0.00072943	0.0030773	up	sp|Q4VCM1|LCAT2_ARATH Phospholipid--sterol O-acyltransferase OS=Arabidopsis thaliana GN=PSAT PE=2 SV=2//0
Cla005974	1382.36	622.348	1.1513	0.00014132	0.00071507	up	sp|Q94K75|RHON1_ARATH Rho-N domain-containing protein 1, chloroplastic OS=Arabidopsis thaliana GN=RHON1 PE=1 SV=1//4.4432e-59
Cla005980	122.799	1.335	6.5233	0.0025734	0.0091427	up	sp|Q9XHP0|11S2_SESIN 11S globulin seed storage protein 2 OS=Sesamum indicum PE=2 SV=1//3.49115e-136
Cla005994	1434.04	761.595	0.91299	0.0023512	0.008444	up	sp|Q9ZP54|PARP1_ARATH Poly [ADP-ribose] polymerase 1 OS=Arabidopsis thaliana GN=PARP1 PE=1 SV=2//0
Cla005996	4127.39	2335.31	0.82162	0.0036331	0.012329	up	sp|Q9M2J9|BET11_ARATH Bet1-like SNARE 1-1 OS=Arabidopsis thaliana GN=BET11 PE=1 SV=1//1.82762e-55
Cla006013	273.713	143.667	0.92993	0.018753	0.049655	up	sp|Q54F15|NUBPL_DICDI Iron-sulfur protein NUBPL OS=Dictyostelium discoideum GN=nubpl PE=3 SV=1//9.24046e-104
Cla006015	1442.5	167.501	3.1063	6.4315e-21	2.9408e-19	up	sp|O04336|WRK21_ARATH Probable WRKY transcription factor 21 OS=Arabidopsis thaliana GN=WRKY21 PE=2 SV=1//2.84415e-15
Cla006016	1058.28	591.384	0.83955	0.0057309	0.018159	up	sp|Q9SMU7|SRP09_ARATH Signal recognition particle 9 kDa protein OS=Arabidopsis thaliana GN=SRP9 PE=3 SV=1//1.71473e-64
[truncated: 6,917 more rows]

## Sheet: O_34vsO_20.DEG
Gene_id	readcount_O_4	readcount_O_2	log2FoldChange	pval	padj	up_down	Blast swiss prot
[truncated: 4,380 more rows]

[truncated: 12 more sheets: P_20vsP_10.DEG, P_34vsP_10.DEG, P_34vsP_20.DEG, R_20vsR_10.DEG, R_34vsR_20.DEG, R_34vsR_10.DEG, W_20vsW_10.DEG, W_34vsW_10.DEG, W_34vsW_20.DEG, Y_20vsY_10.DEG, Y_34vsY_10.DEG, Y_34vsY_20.DEG]
