# Supplementary material for: Transcriptome regulation of carotenoids in five flesh-colored watermelon (Citrullus lanatus)
Source: Research Square preprint supplement (doi:10.21203/rs.3.rs-42816/v2), 2021-01-12
Supplement: Supplementary file 2 [file e01ef14bc7b3c43950a09840.xlsx]

## Sheet: subcluster1 GO
GO_accession	Description	Term_type	Over_represented_pValue	Corrected_pValue	DEG_item	DEG_list	Bg_item	Bg_list	Gene_names
GO:0044710	single-organism metabolic process	biological_process	1.0821e-11	4.8239e-08	567	2218	3152	15506	Cla019840,Cla001434,Cla017149,Cla001225,Cla011749,Cla017462,Cla002093,Cla010255,Cla019110,Cla009782,Cla018292,Cla005583,Cla023475,Cla010932,Cla005589,Cla020214,Cla000798,Cla015725,Cla015968,Cla016264,Cla022008,Cla000181,Cla011597,Cla004358,Cla001947,Cla021742,Cla017383,Cla003928,Cla014389,Cla008058,Cla017396,Cla012553,Cla014813,Cla009301,Cla011267,Cla011996,Cla009165,Cla023286,Cla017567,Cla006812…
GO:0000502	proteasome complex	cellular_component	1.9316e-09	2.6797e-06	18	2218	27	15506	Cla021999,Cla001903,Cla004612,Cla012532,Cla012168,Cla013919,Cla021308,Cla008908,Cla006966,Cla000555,Cla022476,Cla023283,Cla021812,Cla021609,Cla022241,Cla015537,Cla004613,Cla018172
GO:0004298	threonine-type endopeptidase activity	molecular_function	2.4044e-09	2.6797e-06	16	2218	22	15506	Cla021308,Cla021999,Cla001903,Cla013919,Cla012532,Cla004612,Cla012168,Cla015537,Cla022241,Cla021609,Cla004613,Cla018172,Cla008908,Cla000555,Cla023283,Cla022476
GO:0070003	threonine-type peptidase activity	molecular_function	2.4044e-09	2.6797e-06	16	2218	22	15506	Cla000555,Cla023283,Cla022476,Cla008908,Cla018172,Cla015537,Cla022241,Cla021609,Cla004613,Cla013919,Cla012168,Cla004612,Cla012532,Cla021999,Cla001903,Cla021308
GO:0044281	small molecule metabolic process	biological_process	3.9762e-09	3.5452e-06	183	2218	860	15506	Cla020469,Cla018556,Cla003644,Cla020816,Cla010611,Cla009256,Cla007303,Cla021251,Cla003774,Cla014068,Cla014088,Novel00965,Cla009215,Cla008191,Cla004216,Cla017148,Cla016577,Cla008324,Cla004167,Cla009948,Cla015908,Cla000142,Cla019834,Cla022170,Cla022500,Cla014452,Cla008501,Cla009906,Cla016981,Cla014391,Cla020432,Cla005637,Cla020930,Novel00268,Cla019014,Cla017158,Cla015621,Novel00471,Cla021991,Cla006…
GO:1901564	organonitrogen compound metabolic process	biological_process	5.3171e-09	3.9506e-06	279	2218	1431	15506	Cla022442,Cla020737,Cla010611,Cla011721,Cla020469,Cla018556,Cla017148,Cla010217,Cla002033,Cla023235,Cla017411,Cla008191,Cla021256,Cla004216,Cla014088,Novel00965,Cla023167,Cla015908,Cla021113,Cla019834,Cla003456,Cla019068,Cla015515,Cla019797,Cla018917,Cla019021,Cla001766,Cla007069,Cla020208,Cla014176,Novel00485,Cla009906,Cla004950,Cla016981,Cla004264,Cla004999,Cla013241,Cla001251,Cla005375,Cla0148…
GO:0005839	proteasome core complex	cellular_component	6.666e-09	4.2453e-06	16	2218	23	15506	Cla021308,Cla001903,Cla021999,Cla012168,Cla012532,Cla004612,Cla013919,Cla004613,Cla021609,Cla022241,Cla015537,Cla018172,Cla008908,Cla022476,Cla023283,Cla000555
GO:0006163	purine nucleotide metabolic process	biological_process	1.845e-08	9.5151e-06	58	2218	193	15506	Cla018361,Cla019014,Cla015238,Cla003262,Cla018362,Cla015497,Cla019380,Cla023338,Cla021131,Cla014391,Cla017390,Cla022499,Cla009906,Cla013455,Cla018367,Cla008501,Cla014452,Cla012575,Novel01098,Cla003005,Cla017266,Cla022170,Cla003902,Cla019971,Cla017692,Cla019834,Cla021378,Cla016840,Cla008191,Cla004216,Cla007102,Cla005491,Cla014418,Cla011555,Cla011996,Novel00965,Novel01119,Cla011267,Cla003122,Cla022…
GO:0019752	carboxylic acid metabolic process	biological_process	2.1138e-08	9.5151e-06	122	2218	536	15506	Novel01119,Cla017722,Cla003339,Cla021970,Cla005852,Cla008113,Cla008389,Cla023154,Cla011561,Cla010694,Cla011810,Cla016673,Cla014751,Cla004284,Cla004245,Cla014418,Cla021364,Cla023103,Cla005491,Cla015621,Novel01117,Cla001251,Cla004999,Cla004847,Cla013862,Cla008439,Cla008809,Cla021991,Cla005332,Cla006530,Cla016243,Cla018362,Cla004685,Cla004597,Cla010754,Cla007434,Cla013040,Cla002903,Cla013776,Cla0022…
GO:0006753	nucleoside phosphate metabolic process	biological_process	2.1344e-08	9.5151e-06	67	2218	239	15506	Cla020164,Cla019814,Novel00471,Cla004847,Cla003339,Cla017722,Cla015485,Cla015723,Novel01119,Cla003218,Cla011555,Cla014418,Cla005491,Cla007102,Cla021378,Cla016840,Cla005471,Cla019971,Cla003902,Cla017266,Cla003005,Novel01098,Cla012575,Cla013455,Cla018367,Cla017390,Novel01082,Cla023338,Cla021131,Cla015497,Cla018362,Cla003262,Cla015238,Cla005456,Cla018556,Cla022882,Cla003644,Cla020816,Cla008058,Cla00…
GO:0009117	nucleotide metabolic process	biological_process	4.155e-08	1.6049e-05	66	2218	238	15506	Cla005471,Cla016840,Cla021378,Cla012575,Novel01098,Cla019971,Cla003902,Cla003005,Cla017266,Cla015497,Cla018362,Cla017390,Cla013455,Cla018367,Cla023338,Cla021131,Novel01082,Cla015238,Cla003262,Novel00471,Cla019814,Cla020164,Cla004847,Cla011555,Novel01119,Cla003339,Cla015723,Cla015485,Cla017722,Cla005491,Cla007102,Cla014418,Cla019834,Cla008781,Cla014452,Cla008501,Cla022170,Cla017692,Cla022500,Cla01…
GO:0043436	oxoacid metabolic process	biological_process	4.5002e-08	1.6049e-05	123	2218	549	15506	Cla005137,Cla012553,Cla009294,Cla021251,Cla007303,Cla010611,Cla017273,Cla009256,Cla002601,Cla002312,Cla021742,Cla022882,Cla020469,Cla004167,Cla013454,Cla008324,Cla019188,Cla016577,Cla017148,Cla007788,Cla004216,Cla008191,Cla001514,Cla003122,Cla014088,Cla016386,Cla014068,Cla009782,Cla016773,Cla019110,Cla022170,Cla015908,Cla000142,Cla010898,Novel00792,Cla014407,Cla017149,Cla017158,Cla018361,Cla01901…
GO:0072521	purine-containing compound metabolic process	biological_process	4.68e-08	1.6049e-05	58	2218	200	15506	Cla008191,Cla004216,Cla005491,Cla007102,Cla014418,Cla011555,Cla011996,Novel01119,Cla011267,Novel00965,Cla003122,Cla022333,Cla015723,Cla015485,Cla001204,Cla017722,Cla003339,Cla020955,Cla003774,Cla004819,Cla004847,Cla008058,Cla020816,Novel00471,Cla019814,Cla003644,Cla022882,Cla018556,Cla020164,Cla005456,Cla018361,Cla019014,Cla015238,Cla003262,Cla018362,Cla019380,Cla015497,Cla023338,Cla021131,Cla014…
GO:0009150	purine ribonucleotide metabolic process	biological_process	5.5126e-08	1.6744e-05	56	2218	189	15506	Cla018362,Cla019380,Cla015497,Cla021131,Cla014391,Cla013455,Cla018367,Cla017390,Cla022499,Cla009906,Cla018361,Cla019014,Cla003262,Cla015238,Cla019834,Cla016840,Cla021378,Cla008501,Cla012575,Novel01098,Cla014452,Cla017266,Cla003005,Cla019971,Cla003902,Cla017692,Cla022170,Novel01119,Novel00965,Cla011267,Cla011996,Cla011555,Cla022333,Cla003122,Cla001204,Cla017722,Cla015485,Cla015723,Cla003339,Cla004…
GO:0006082	organic acid metabolic process	biological_process	5.634e-08	1.6744e-05	123	2218	551	15506	Cla009782,Cla016773,Cla019110,Cla022170,Cla000142,Cla015908,Cla010898,Cla014407,Novel00792,Cla017149,Cla017158,Cla018361,Cla019014,Cla015725,Cla016761,Cla015968,Cla016264,Cla003665,Cla005589,Novel00268,Cla005671,Cla020930,Cla005637,Cla020432,Cla020517,Cla016981,Cla018253,Cla010547,Cla022499,Cla005137,Cla012553,Cla009294,Cla021251,Cla007303,Cla017273,Cla010611,Cla009256,Cla002601,Cla002312,Cla0217…
GO:1901135	carbohydrate derivative metabolic process	biological_process	6.4491e-08	1.7426e-05	111	2218	478	15506	Cla016840,Cla021378,Cla020558,Cla018594,Cla015963,Cla018178,Cla019971,Cla003902,Cla017266,Cla016672,Cla003005,Cla014339,Novel01098,Cla012575,Cla017988,Cla013455,Cla018367,Cla008325,Cla012602,Cla017390,Cla000921,Novel01082,Cla021131,Cla023338,Cla008385,Cla015497,Cla018362,Cla012748,Cla003262,Cla015238,Cla021407,Cla016014,Cla020164,Cla019814,Novel00471,Cla008977,Cla007664,Cla004847,Cla021734,Cla004…
GO:0009259	ribonucleotide metabolic process	biological_process	6.6452e-08	1.7426e-05	56	2218	190	15506	Cla014452,Cla012575,Novel01098,Cla008501,Cla022170,Cla003902,Cla019971,Cla017692,Cla003005,Cla017266,Cla019834,Cla016840,Cla021378,Cla019014,Cla018361,Cla015238,Cla003262,Cla019380,Cla015497,Cla018362,Cla022499,Cla017390,Cla009906,Cla013455,Cla018367,Cla014391,Cla021131,Cla020955,Cla003774,Cla004819,Cla004847,Novel00471,Cla019814,Cla003644,Cla020816,Cla005456,Cla018556,Cla022882,Cla020164,Cla0071…
GO:0042278	purine nucleoside metabolic process	biological_process	8.003e-08	1.8778e-05	54	2218	181	15506	Cla019014,Cla018361,Cla015238,Cla019380,Cla015497,Cla018362,Cla022499,Cla009906,Cla017390,Cla018367,Cla013455,Cla014391,Cla021131,Cla014452,Cla012575,Novel01098,Cla008501,Cla022170,Cla003902,Cla019971,Cla017692,Cla003005,Cla017266,Cla019834,Cla021378,Cla016840,Cla005491,Cla007102,Cla014418,Cla008191,Cla004216,Cla022333,Cla003122,Cla011555,Cla011267,Novel01119,Novel00965,Cla003339,Cla015723,Cla015…
GO:0046128	purine ribonucleoside metabolic process	biological_process	8.003e-08	1.8778e-05	54	2218	181	15506	Cla017722,Cla001204,Cla015723,Cla015485,Cla003339,Novel01119,Novel00965,Cla011267,Cla011555,Cla003122,Cla022333,Cla004216,Cla008191,Cla014418,Cla005491,Cla007102,Cla020164,Cla022882,Cla018556,Cla005456,Cla020816,Cla003644,Cla019814,Novel00471,Cla004847,Cla004819,Cla003774,Cla020955,Cla014391,Cla021131,Cla018367,Cla013455,Cla009906,Cla022499,Cla017390,Cla018362,Cla019380,Cla015497,Cla015238,Cla018…
GO:0019693	ribose phosphate metabolic process	biological_process	8.8656e-08	1.9761e-05	57	2218	196	15506	Cla008191,Cla004216,Cla005491,Cla007102,Cla014418,Cla011996,Cla011555,Novel01119,Cla011267,Novel00965,Cla022333,Cla003122,Cla015723,Cla015485,Cla017722,Cla001204,Cla003339,Cla020955,Cla003774,Cla004819,Cla004847,Cla020816,Novel00471,Cla019814,Cla003644,Cla022882,Cla018556,Cla020164,Cla005456,Cla018361,Cla019014,Cla015238,Cla003262,Cla010932,Cla018362,Cla019380,Cla015497,Cla021131,Cla014391,Cla022…
GO:0016887	ATPase activity	molecular_function	1.4848e-07	3.152e-05	88	2218	394	15506	Cla009889,Cla005201,Cla020337,Cla007828,Cla021357,Cla008501,Cla014452,Cla005583,Cla020787,Cla012278,Cla004874,Cla017808,Cla008438,Cla019380,Cla002353,Cla001020,Cla009910,Cla011367,Cla016531,Cla010704,Cla020249,Cla017037,Cla003535,Cla019125,Cla023201,Cla019070,Cla003774,Cla003084,Cla013457,Cla012813,Cla005603,Cla023341,Cla017215,Cla012105,Cla004905,Cla021016,Cla006812,Cla012284,Cla021256,Cla014216…
GO:0009141	nucleoside triphosphate metabolic process	biological_process	2.9181e-07	5.9131e-05	48	2218	158	15506	Cla018362,Cla015497,Cla019380,Novel01082,Cla021131,Cla014391,Cla013455,Cla018367,Cla022499,Cla009906,Cla018361,Cla019014,Cla015238,Cla019834,Cla021378,Cla016840,Novel01098,Cla014452,Cla017266,Cla022500,Cla003005,Cla019971,Cla003902,Cla017692,Cla022170,Novel01119,Cla011267,Novel00965,Cla011555,Cla003122,Cla022333,Cla017722,Cla015485,Cla003339,Cla004216,Cla008191,Cla014418,Cla005491,Cla020816,Cla00…
GO:0009119	ribonucleoside metabolic process	biological_process	3.321e-07	6.437e-05	54	2218	188	15506	Cla018367,Cla013455,Cla022499,Cla009906,Cla017390,Cla021131,Cla014391,Cla015497,Cla019380,Cla018362,Cla015238,Cla019014,Cla018361,Cla016840,Cla021378,Cla019834,Cla019971,Cla003902,Cla017692,Cla022170,Cla017266,Cla003005,Cla012575,Novel01098,Cla014452,Cla008501,Cla003339,Cla017722,Cla001204,Cla015723,Cla015485,Cla022333,Cla003122,Novel01119,Cla011267,Novel00965,Cla011555,Cla014418,Cla007102,Cla005…
GO:0009116	nucleoside metabolic process	biological_process	3.9519e-07	7.047e-05	58	2218	211	15506	Cla005456,Cla018556,Cla022882,Cla020164,Novel00471,Cla003644,Cla019814,Cla020816,Cla004819,Cla004847,Cla004264,Cla011131,Cla020955,Cla003774,Cla003339,Cla015723,Cla015485,Cla001204,Cla017722,Cla022333,Cla003122,Cla011555,Novel01119,Cla011267,Novel00965,Cla007102,Cla005491,Cla014418,Cla008191,Cla004216,Cla008781,Cla016840,Cla021378,Cla019834,Cla018178,Cla022170,Cla019971,Cla003902,Cla017692,Cla003…
GO:1901657	glycosyl compound metabolic process	biological_process	3.9519e-07	7.047e-05	58	2218	211	15506	Cla003122,Cla022333,Novel01119,Cla011267,Novel00965,Cla011555,Cla003339,Cla017722,Cla001204,Cla015723,Cla015485,Cla014418,Cla005491,Cla007102,Cla004216,Cla008191,Cla019814,Cla003644,Novel00471,Cla020816,Cla005456,Cla020164,Cla022882,Cla018556,Cla004264,Cla011131,Cla003774,Cla020955,Cla004847,Cla004819,Cla019380,Cla015497,Cla018362,Cla013455,Cla018367,Cla022499,Cla009906,Cla017390,Cla014391,Cla021…
GO:0046034	ATP metabolic process	biological_process	4.3547e-07	7.4666e-05	46	2218	151	15506	Cla018361,Cla019014,Cla015238,Cla018362,Cla019380,Cla015497,Cla014391,Cla021131,Cla013455,Cla018367,Cla009906,Cla022499,Novel01098,Cla014452,Cla017266,Cla003005,Cla003902,Cla019971,Cla017692,Cla022170,Cla019834,Cla021378,Cla016840,Cla004216,Cla008191,Cla014418,Cla005491,Novel01119,Novel00965,Cla011267,Cla011555,Cla003122,Cla022333,Cla017722,Cla015485,Cla003339,Cla003774,Cla020955,Cla004847,Cla020…
GO:0009123	nucleoside monophosphate metabolic process	biological_process	4.5634e-07	7.5346e-05	48	2218	161	15506	Cla005456,Cla020164,Cla018556,Cla022882,Cla003644,Novel00471,Cla020816,Cla004847,Cla003774,Cla020955,Cla003339,Cla017722,Cla015485,Cla003122,Cla022333,Novel01119,Cla011267,Novel00965,Cla011555,Cla011996,Cla014418,Cla005491,Cla004216,Cla008191,Cla016577,Cla021378,Cla016840,Cla019834,Cla017692,Cla019971,Cla003902,Cla022170,Cla017266,Cla003005,Novel01098,Cla014452,Cla018367,Cla013455,Cla009906,Cla02…
GO:0009126	purine nucleoside monophosphate metabolic process	biological_process	6.5619e-07	0.00010087	47	2218	158	15506	Cla004216,Cla008191,Cla014418,Cla005491,Novel00965,Novel01119,Cla011267,Cla011555,Cla011996,Cla022333,Cla003122,Cla017722,Cla015485,Cla003339,Cla003774,Cla020955,Cla004847,Cla020816,Cla003644,Novel00471,Cla020164,Cla018556,Cla022882,Cla005456,Cla018361,Cla019014,Cla015238,Cla018362,Cla019380,Cla015497,Cla021131,Cla014391,Cla018367,Cla013455,Cla009906,Cla022499,Novel01098,Cla014452,Cla017266,Cla00…
GO:0009167	purine ribonucleoside monophosphate metabolic process	biological_process	6.5619e-07	0.00010087	47	2218	158	15506	Cla017692,Cla019971,Cla003902,Cla022170,Cla017266,Cla003005,Novel01098,Cla014452,Cla016840,Cla021378,Cla019834,Cla015238,Cla019014,Cla018361,Cla013455,Cla018367,Cla009906,Cla022499,Cla021131,Cla014391,Cla015497,Cla019380,Cla018362,Cla004847,Cla003774,Cla020955,Cla005456,Cla020164,Cla022882,Cla018556,Cla003644,Novel00471,Cla020816,Cla014418,Cla005491,Cla004216,Cla008191,Cla003339,Cla017722,Cla0154…
GO:0009161	ribonucleoside monophosphate metabolic process	biological_process	7.905e-07	0.00011747	47	2218	159	15506	Cla014418,Cla005491,Cla004216,Cla008191,Cla003122,Cla022333,Novel00965,Novel01119,Cla011267,Cla011555,Cla011996,Cla003339,Cla017722,Cla015485,Cla003774,Cla020955,Cla004847,Cla003644,Novel00471,Cla020816,Cla005456,Cla020164,Cla022882,Cla018556,Cla019014,Cla018361,Cla015238,Cla019380,Cla015497,Cla018362,Cla018367,Cla013455,Cla022499,Cla009906,Cla014391,Cla021131,Novel01098,Cla014452,Cla003902,Cla01…
GO:0009144	purine nucleoside triphosphate metabolic process	biological_process	1.0424e-06	0.00013846	46	2218	155	15506	Cla003005,Cla017266,Cla022170,Cla017692,Cla019971,Cla003902,Cla014452,Novel01098,Cla021378,Cla016840,Cla019834,Cla015238,Cla018361,Cla019014,Cla014391,Cla021131,Cla009906,Cla022499,Cla018367,Cla013455,Cla018362,Cla019380,Cla015497,Cla004847,Cla020955,Cla003774,Cla018556,Cla022882,Cla020164,Cla005456,Cla020816,Novel00471,Cla003644,Cla008191,Cla004216,Cla005491,Cla014418,Cla015485,Cla017722,Cla0033…
GO:0009199	ribonucleoside triphosphate metabolic process	biological_process	1.0424e-06	0.00013846	46	2218	155	15506	Cla014391,Cla021131,Cla009906,Cla022499,Cla018367,Cla013455,Cla018362,Cla019380,Cla015497,Cla015238,Cla018361,Cla019014,Cla016840,Cla021378,Cla019834,Cla003005,Cla017266,Cla022170,Cla019971,Cla003902,Cla017692,Cla014452,Novel01098,Cla015485,Cla017722,Cla003339,Cla011555,Cla011267,Novel01119,Novel00965,Cla022333,Cla003122,Cla008191,Cla004216,Cla005491,Cla014418,Cla022882,Cla018556,Cla020164,Cla005…
GO:0009205	purine ribonucleoside triphosphate metabolic process	biological_process	1.0424e-06	0.00013846	46	2218	155	15506	Cla014452,Novel01098,Cla003005,Cla017266,Cla022170,Cla019971,Cla003902,Cla017692,Cla019834,Cla021378,Cla016840,Cla018361,Cla019014,Cla015238,Cla018362,Cla015497,Cla019380,Cla021131,Cla014391,Cla009906,Cla022499,Cla018367,Cla013455,Cla020955,Cla003774,Cla004847,Cla020816,Novel00471,Cla003644,Cla018556,Cla022882,Cla020164,Cla005456,Cla008191,Cla004216,Cla005491,Cla014418,Cla011555,Cla011267,Novel01…
GO:0055086	nucleobase-containing small molecule metabolic process	biological_process	1.0561e-06	0.00013846	70	2218	276	15506	Cla003644,Cla020816,Cla005456,Cla018556,Cla022882,Cla003774,Cla020955,Cla008058,Cla004819,Cla003122,Cla022333,Cla011267,Novel00965,Cla011996,Cla009301,Cla001204,Cla016577,Cla011125,Cla004216,Cla008191,Cla019834,Cla008781,Cla014452,Cla008501,Cla017692,Cla022170,Cla022500,Cla019380,Cla010932,Cla022499,Cla009906,Cla014391,Cla019014,Cla018361,Cla019814,Novel00471,Cla020164,Cla004264,Cla011131,Cla0048…
GO:0006090	pyruvate metabolic process	biological_process	1.0871e-06	0.00013846	19	2218	42	15506	Cla014418,Cla005491,Cla004216,Cla008191,Cla019014,Cla018361,Cla013455,Cla003339,Cla018367,Cla022499,Cla017722,Cla003122,Novel01119,Cla018362,Cla003902,Cla022170,Cla004847,Cla022882,Cla015963
GO:0006096	glycolytic process	biological_process	1.3781e-06	0.00014984	18	2218	39	15506	Cla018361,Cla019014,Cla004216,Cla008191,Cla014418,Cla005491,Cla018362,Novel01119,Cla003122,Cla017722,Cla013455,Cla003339,Cla018367,Cla022499,Cla004847,Cla003902,Cla022170,Cla022882
GO:0006757	ATP generation from ADP	biological_process	1.3781e-06	0.00014984	18	2218	39	15506	Cla017722,Cla022499,Cla003339,Cla013455,Cla018367,Cla018362,Novel01119,Cla003122,Cla008191,Cla004216,Cla005491,Cla014418,Cla018361,Cla019014,Cla022882,Cla004847,Cla022170,Cla003902
GO:0009135	purine nucleoside diphosphate metabolic process	biological_process	1.3781e-06	0.00014984	18	2218	39	15506	Cla004847,Cla003902,Cla022170,Cla022882,Cla004216,Cla008191,Cla014418,Cla005491,Cla018361,Cla019014,Cla017722,Cla018367,Cla003339,Cla013455,Cla022499,Novel01119,Cla018362,Cla003122
GO:0009179	purine ribonucleoside diphosphate metabolic process	biological_process	1.3781e-06	0.00014984	18	2218	39	15506	Cla022882,Cla003902,Cla022170,Cla004847,Cla013455,Cla003339,Cla018367,Cla022499,Cla017722,Cla003122,Cla018362,Novel01119,Cla014418,Cla005491,Cla004216,Cla008191,Cla019014,Cla018361
GO:0009185	ribonucleoside diphosphate metabolic process	biological_process	1.3781e-06	0.00014984	18	2218	39	15506	Cla019014,Cla018361,Cla014418,Cla005491,Cla004216,Cla008191,Cla003122,Cla018362,Novel01119,Cla013455,Cla003339,Cla018367,Cla022499,Cla017722,Cla003902,Cla022170,Cla004847,Cla022882
GO:0046031	ADP metabolic process	biological_process	1.3781e-06	0.00014984	18	2218	39	15506	Cla018362,Novel01119,Cla003122,Cla017722,Cla003339,Cla018367,Cla013455,Cla022499,Cla018361,Cla019014,Cla004216,Cla008191,Cla014418,Cla005491,Cla022882,Cla004847,Cla003902,Cla022170
GO:0008152	metabolic process	biological_process	1.4332e-06	0.00015213	1279	2218	8294	15506	Cla001903,Cla000615,Cla016698,Cla016531,Cla017290,Cla007069,Cla001799,Cla014176,Cla018918,Cla001020,Cla009906,Cla016981,Cla004950,Cla013730,Cla011144,Cla020787,Cla010331,Cla014272,Cla015515,Novel00908,Cla023235,Novel00587,Cla008396,Cla008191,Cla006331,Cla013145,Cla012105,Novel00965,Cla018200,Cla015276,Cla019444,Cla008109,Cla004698,Cla017037,Cla020469,Cla020278,Cla015909,Cla016802,Cla015028,Novel0…
GO:0003824	catalytic activity	molecular_function	1.5933e-06	0.00016518	1164	2218	7541	15506	Cla015598,Cla013653,Cla007857,Cla014854,Cla005675,Cla007239,Cla007590,Cla000964,Cla008768,Cla001925,Cla007727,Cla001823,Cla022882,Novel01170,Cla018848,Cla011228,Cla008299,Cla020920,Cla009327,Cla002353,Cla010547,Cla021308,Cla017359,Cla009676,Cla005994,Cla016773,Cla021348,Cla013660,Novel00792,Cla008176,Cla014407,Cla011132,Cla001493,Cla010580,Cla003959,Cla007102,Cla014129,Cla023154,Cla013931,Cla0026…
GO:0044724	single-organism carbohydrate catabolic process	biological_process	2.1204e-06	0.00021483	21	2218	51	15506	Cla005491,Cla014418,Cla008191,Cla004216,Cla019014,Cla018361,Cla022499,Cla003339,Cla013455,Cla018367,Cla017722,Cla003122,Cla018362,Novel01119,Cla022170,Cla003902,Cla008834,Cla004847,Cla022882,Cla013639,Cla012154
GO:0055114	oxidation-reduction process	biological_process	2.59e-06	0.00025658	277	2218	1504	15506	Cla016773,Cla010856,Cla017692,Cla021357,Cla006800,Cla007650,Cla010898,Cla011132,Cla008176,Cla010704,Cla021039,Cla011995,Cla010547,Cla005671,Cla022051,Cla017273,Cla011456,Cla015552,Cla015036,Cla002312,Cla014854,Cla011643,Cla019374,Cla016386,Cla000964,Cla001204,Cla004584,Cla023464,Cla007239,Cla008358,Cla009816,Cla002430,Cla019109,Cla004157,Cla004094,Cla022460,Cla001358,Cla010403,Cla020798,Cla002202…
GO:1901575	organic substance catabolic process	biological_process	2.8929e-06	0.00027675	85	2218	366	15506	Cla016671,Cla016926,Cla003902,Cla016611,Cla014339,Cla010434,Cla016672,Cla000555,Cla022306,Cla018172,Cla013639,Cla021934,Cla015822,Cla016041,Cla008915,Cla004612,Cla003262,Cla020697,Cla006584,Cla012602,Cla013455,Cla018367,Cla018362,Cla017877,Cla008834,Cla006966,Cla015127,Cla004847,Cla004999,Cla001251,Cla016667,Cla012513,Cla018240,Cla013617,Cla022241,Cla005491,Cla014418,Cla016673,Cla000199,Cla018433…
GO:0009132	nucleoside diphosphate metabolic process	biological_process	2.9178e-06	0.00027675	19	2218	44	15506	Cla022882,Cla022170,Cla003902,Cla004847,Cla022499,Cla018367,Cla003339,Cla013455,Cla017722,Cla003122,Cla003218,Novel01119,Cla018362,Cla005491,Cla014418,Cla008191,Cla004216,Cla019014,Cla018361
GO:0030163	protein catabolic process	biological_process	4.8705e-06	0.00045235	32	2218	99	15506	Cla018514,Cla005612,Cla021999,Cla018314,Cla013158,Cla023283,Cla022476,Cla015127,Cla006966,Cla016667,Cla017222,Cla022241,Cla021609,Cla013919,Cla012168,Cla004612,Cla012532,Cla020697,Cla001903,Cla006584,Cla015617,Cla021308,Cla017808,Cla016611,Cla016926,Cla000555,Cla008908,Cla018172,Cla004613,Cla015822,Cla015537,Cla008915
GO:0019637	organophosphate metabolic process	biological_process	7.1777e-06	0.00065214	95	2218	429	15506	Cla002350,Cla018362,Cla015497,Cla021131,Cla023338,Novel01082,Cla012602,Cla017390,Cla013455,Cla018367,Cla021407,Cla015238,Cla003262,Cla015963,Cla005471,Cla016840,Cla021378,Cla017988,Cla005570,Novel01098,Cla012575,Cla016672,Cla003005,Cla017266,Cla003902,Cla019971,Cla011555,Cla003218,Novel01119,Cla015723,Cla015485,Cla017722,Cla003339,Cla015001,Cla011595,Cla016673,Cla007102,Cla005491,Cla014418,Novel0…
GO:0048037	cofactor binding	molecular_function	7.3143e-06	0.00065214	118	2218	558	15506	Cla004886,Cla022705,Cla014492,Cla022380,Cla013473,Cla022468,Cla021327,Cla019110,Cla002249,Cla019644,Cla015908,Cla021143,Cla010898,Cla011132,Cla000612,Cla004553,Cla000897,Cla020476,Cla015968,Cla005495,Cla023475,Cla010932,Cla005671,Cla020214,Cla016981,Cla011995,Cla015410,Cla010547,Cla012553,Cla007303,Cla017273,Cla009256,Cla015909,Cla014064,Cla004567,Cla009847,Cla016644,Cla006743,Cla013454,Cla018514…
GO:0006165	nucleoside diphosphate phosphorylation	biological_process	8.8218e-06	0.0007563	18	2218	43	15506	Cla004847,Cla003902,Cla022170,Cla022882,Cla004216,Cla008191,Cla014418,Cla005491,Cla018361,Cla019014,Cla017722,Cla013455,Cla018367,Cla003339,Cla022499,Cla018362,Novel01119,Cla003122
GO:0046939	nucleotide phosphorylation	biological_process	8.8218e-06	0.0007563	18	2218	43	15506	Cla017722,Cla003339,Cla013455,Cla018367,Cla022499,Cla018362,Novel01119,Cla003122,Cla004216,Cla008191,Cla014418,Cla005491,Cla018361,Cla019014,Cla022882,Cla004847,Cla003902,Cla022170
GO:0044444	cytoplasmic part	cellular_component	8.9995e-06	0.00075697	218	2218	1159	15506	Cla017279,Cla005761,Cla018436,Cla021734,Cla014746,Cla020784,Cla017615,Cla010411,Cla008692,Cla005076,Cla007350,Cla009145,Cla019026,Cla000258,Cla004074,Cla004291,Novel00273,Cla016554,Cla001181,Cla013335,Cla012694,Cla000199,Cla018210,Cla004183,Cla007619,Cla006136,Cla008829,Cla019529,Cla010745,Cla013688,Cla002648,Cla021147,Cla013782,Cla011084,Cla022999,Novel01111,Cla021436,Cla008514,Cla012674,Cla0179…
GO:0019773	proteasome core complex, alpha-subunit complex	cellular_component	1.0301e-05	0.00085037	8	2218	10	15506	Cla004613,Cla018172,Cla008908,Cla012532,Cla012168,Cla004612,Cla022476,Cla023283
GO:0005737	cytoplasm	cellular_component	1.1553e-05	0.00093646	268	2218	1470	15506	Cla019376,Cla018129,Cla016038,Cla004597,Cla022868,Cla018049,Cla021845,Cla003005,Cla019971,Cla013971,Cla020558,Cla006791,Cla000667,Cla022278,Cla006870,Cla003600,Cla016465,Cla014815,Cla008113,Cla003667,Cla009062,Cla008070,Cla011011,Novel00933,Cla021991,Cla007019,Cla006349,Cla000813,Cla013678,Cla004936,Cla008837,Cla005950,Cla018561,Novel00471,Cla011936,Cla004317,Cla012094,Cla008817,Cla017046,Cla0062…
GO:0009378	four-way junction helicase activity	molecular_function	1.2444e-05	0.00096085	33	2218	117	15506	Cla021016,Cla004905,Cla018314,Cla002747,Cla004278,Cla006812,Cla009035,Cla012284,Cla014216,Cla002913,Cla017037,Cla004257,Cla015315,Cla003084,Cla013457,Cla012813,Cla023341,Cla017808,Cla008438,Cla016736,Cla014303,Cla014239,Cla011367,Cla007398,Cla018198,Cla006509,Cla017036,Cla005201,Cla008501,Cla005583,Cla020787,Cla022984,Cla004874
GO:0044257	cellular protein catabolic process	biological_process	1.2501e-05	0.00096085	29	2218	89	15506	Cla016611,Cla023283,Cla022476,Cla016926,Cla000555,Cla008908,Cla018172,Cla016667,Cla004613,Cla017222,Cla015822,Cla022241,Cla015537,Cla008915,Cla021609,Cla013919,Cla012168,Cla004612,Cla012532,Cla020697,Cla001903,Cla005612,Cla006584,Cla021999,Cla018314,Cla015617,Cla021308,Cla013158,Cla017808
GO:0051603	proteolysis involved in cellular protein catabolic process	biological_process	1.2501e-05	0.00096085	29	2218	89	15506	Cla008908,Cla022476,Cla016926,Cla023283,Cla016611,Cla000555,Cla017222,Cla015822,Cla004613,Cla021609,Cla008915,Cla022241,Cla015537,Cla016667,Cla018172,Cla005612,Cla020697,Cla001903,Cla021999,Cla006584,Cla004612,Cla012168,Cla012532,Cla013919,Cla013158,Cla017808,Cla015617,Cla018314,Cla021308
GO:0006091	generation of precursor metabolites and energy	biological_process	1.5007e-05	0.0011339	43	2218	159	15506	Cla003339,Cla006136,Cla014035,Cla017722,Cla007123,Cla022333,Cla003122,Novel01119,Cla011555,Cla014418,Cla005491,Cla006797,Cla004216,Cla008191,Cla000199,Cla008389,Cla005456,Cla015431,Cla018556,Cla022882,Cla002312,Cla007720,Novel00922,Cla004847,Cla020955,Cla013455,Cla018367,Cla022499,Cla009906,Cla014391,Cla018362,Novel01307,Cla005589,Cla015641,Cla019014,Cla018361,Cla004332,Cla000142,Cla017692,Cla003…
GO:0006733	oxidoreduction coenzyme metabolic process	biological_process	1.8091e-05	0.0013442	22	2218	61	15506	Cla007239,Cla003122,Cla010932,Novel01119,Cla018362,Cla022499,Cla013455,Cla018367,Cla003339,Cla004584,Cla017722,Cla019014,Cla018361,Cla014854,Cla005491,Cla014418,Cla008191,Cla004216,Cla022882,Cla022170,Cla003902,Cla004847
GO:0006520	cellular amino acid metabolic process	biological_process	2.1448e-05	0.0015585	74	2218	327	15506	Cla016264,Cla015968,Cla016761,Cla015725,Cla005637,Cla020432,Cla020930,Cla005671,Novel00268,Cla005589,Cla010547,Cla018253,Cla016981,Cla009782,Cla019110,Cla015908,Cla017149,Novel00792,Cla014407,Cla017148,Cla019188,Cla016577,Cla007788,Cla008324,Cla013454,Cla014088,Cla014068,Cla016386,Cla021251,Cla012553,Cla005137,Cla017273,Cla010611,Cla020469,Cla021742,Cla006584,Cla005344,Cla011076,Cla006895,Cla0029…
GO:0044265	cellular macromolecule catabolic process	biological_process	2.1675e-05	0.0015585	35	2218	121	15506	Cla008915,Cla015537,Cla015822,Cla004613,Cla018172,Cla008908,Cla010434,Cla000555,Cla016926,Cla016611,Cla017808,Cla021308,Cla015617,Cla006584,Cla020697,Cla001903,Cla012532,Cla004612,Cla012168,Cla013919,Cla021609,Cla022241,Cla018240,Cla017222,Cla016667,Cla022476,Cla023283,Cla013158,Cla010280,Cla018314,Cla018469,Cla021999,Cla014185,Cla000199,Cla005612
GO:0006310	DNA recombination	biological_process	2.9023e-05	0.0020537	47	2218	194	15506	Cla017037,Cla012958,Novel00342,Cla008555,Cla015315,Cla004257,Cla003084,Cla019611,Cla012813,Cla013457,Cla008109,Cla017661,Cla023341,Novel00306,Cla021016,Cla004905,Cla002747,Novel00467,Cla018314,Cla004278,Cla006812,Cla009035,Cla012284,Cla014216,Cla002913,Cla003600,Cla006509,Cla018198,Cla017036,Cla005201,Cla008501,Novel00925,Cla005583,Cla020787,Cla022984,Cla004874,Cla017838,Cla007709,Cla017808,Cla00…
GO:0044699	single-organism process	biological_process	4.1327e-05	0.0028787	909	2218	5808	15506	Cla016926,Cla016671,Cla012753,Cla021430,Cla013627,Cla020190,Cla002414,Cla013639,Cla020435,Novel00249,Cla017036,Cla022235,Cla023248,Cla011351,Cla005344,Cla004473,Cla004935,Cla007846,Cla011547,Cla018764,Cla023166,Novel00571,Cla009297,Cla017560,Cla015497,Cla007664,Cla015127,Cla010423,Cla019498,Cla011371,Cla013650,Cla004074,Cla020047,Novel01117,Cla008580,Cla005899,Cla005283,Cla012958,Novel00273,Cla02…
GO:1901566	organonitrogen compound biosynthetic process	biological_process	6.6462e-05	0.0044951	198	2218	1069	15506	Cla009745,Cla004936,Cla005950,Cla014885,Cla014211,Novel00471,Cla004317,Cla017814,Cla021991,Cla006530,Cla008809,Cla001251,Cla013241,Cla004999,Cla007019,Cla009062,Cla018755,Cla014751,Cla016673,Cla021037,Cla003600,Cla004245,Cla008113,Cla014760,Cla015666,Cla016086,Cla021378,Cla016840,Cla006791,Cla007616,Cla003005,Cla021845,Cla017266,Cla009763,Cla013971,Cla007272,Cla009410,Cla019971,Cla016328,Cla01798…
GO:0016462	pyrophosphatase activity	molecular_function	6.6549e-05	0.0044951	128	2218	692	15506	Cla001020,Cla013730,Cla008438,Cla020249,Cla016531,Cla011367,Cla020815,Cla007828,Cla009889,Cla012278,Cla020787,Cla014452,Cla008501,Cla003129,Cla004905,Cla021016,Cla012105,Cla015527,Cla009612,Cla014216,Cla021256,Cla012284,Cla018469,Cla014222,Cla023201,Cla017037,Cla017215,Cla012813,Cla005603,Cla003774,Cla012972,Cla014239,Cla019316,Cla009670,Cla010171,Cla016736,Cla005619,Cla007817,Cla008897,Cla020455…
GO:0044763	single-organism cellular process	biological_process	6.8561e-05	0.0045618	641	2218	4018	15506	Cla011786,Cla015431,Cla020816,Novel00922,Cla023201,Novel00688,Cla003774,Cla005603,Cla021251,Cla014068,Cla016120,Cla004905,Cla014048,Cla009215,Cla019954,Cla008324,Cla004167,Cla009747,Cla016167,Cla006940,Cla009948,Cla004949,Cla000142,Cla022500,Cla013651,Cla022043,Cla022170,Cla010295,Cla014452,Cla014391,Cla022678,Novel01307,Novel00268,Cla022397,Cla020432,Cla011094,Cla008037,Cla015809,Cla016667,Cla02…
GO:0016491	oxidoreductase activity	molecular_function	7.2756e-05	0.0047698	284	2218	1604	15506	Cla004901,Cla011902,Cla003665,Cla019591,Cla001775,Cla010932,Cla023475,Cla020214,Cla016264,Cla015968,Cla023299,Cla011596,Cla011597,Novel00317,Cla004358,Novel01210,Cla001947,Cla000612,Cla002093,Cla019110,Cla021593,Cla023026,Cla019644,Cla018292,Cla009782,Cla022468,Cla017039,Cla009165,Cla015833,Cla017567,Cla016644,Cla013454,Cla020464,Cla012354,Cla009847,Cla005456,Novel00177,Cla009294,Cla001857,Cla022…
GO:0051536	iron-sulfur cluster binding	molecular_function	7.9848e-05	0.0050852	27	2218	90	15506	Cla022283,Cla022496,Cla022881,Cla011342,Cla013699,Cla001857,Cla005926,Cla008376,Cla001775,Cla019591,Cla000840,Cla016176,Novel00891,Cla005925,Cla021830,Cla010851,Cla011099,Cla013019,Cla022806,Cla002376,Cla013694,Cla001947,Cla015464,Cla015160,Cla021802,Cla021628,Cla007734
GO:0051540	metal cluster binding	molecular_function	7.9848e-05	0.0050852	27	2218	90	15506	Cla022881,Cla011342,Cla022283,Cla022496,Cla005926,Cla008376,Cla013699,Cla001857,Cla016176,Cla021830,Novel00891,Cla005925,Cla011099,Cla010851,Cla013019,Cla022806,Cla019591,Cla001775,Cla000840,Cla015160,Cla021802,Cla021628,Cla007734,Cla002376,Cla013694,Cla001947,Cla015464
GO:0044237	cellular metabolic process	biological_process	8.4411e-05	0.0053001	912	2218	5878	15506	Cla004819,Cla007745,Cla022476,Cla007696,Novel00404,Cla005137,Cla003084,Cla015323,Cla022882,Cla003300,Cla008555,Cla022077,Cla005675,Cla022644,Cla014854,Cla013653,Cla015598,Cla019374,Cla007788,Cla016009,Cla004584,Cla020457,Cla007239,Cla005994,Cla016773,Cla017838,Cla018048,Cla021357,Cla013731,Cla017274,Cla015452,Cla005247,Cla014407,Novel00792,Cla012168,Cla010704,Cla009327,Cla011228,Cla009910,Novel01…
GO:0050662	coenzyme binding	molecular_function	8.8254e-05	0.0054644	97	2218	463	15506	Cla010547,Cla011995,Cla020214,Cla005671,Cla010932,Cla023475,Cla015968,Cla005495,Cla020476,Cla000897,Cla004553,Cla011132,Cla010898,Cla000612,Cla021143,Cla015908,Cla019644,Cla021327,Cla019110,Cla022468,Cla004886,Cla022380,Cla022705,Cla014068,Cla016386,Cla001204,Cla008358,Cla009165,Cla004639,Cla006331,Cla004684,Cla018514,Cla013454,Cla006743,Cla016644,Cla009847,Cla015909,Cla017273,Cla009256,Cla007303…
GO:0006399	tRNA metabolic process	biological_process	0.0001028	0.0062776	70	2218	325	15506	Cla016840,Cla006791,Cla015666,Cla017988,Cla021430,Cla019109,Cla005050,Cla013695,Cla004685,Cla016736,Cla014303,Cla006584,Cla023248,Cla004257,Cla002818,Cla012928,Cla005283,Cla001251,Cla010098,Cla021991,Cla020915,Cla018438,Cla002747,Cla018314,Cla003751,Cla014518,Cla008113,Cla004278,Cla009035,Cla018407,Cla010694,Cla011810,Cla004245,Cla002517,Cla014422,Cla023103,Cla020337,Cla005201,Cla010071,Cla008501…
GO:0043648	dicarboxylic acid metabolic process	biological_process	0.00010636	0.0064077	14	2218	33	15506	Cla014751,Cla019110,Cla006530,Cla009763,Cla004245,Cla016328,Cla015968,Cla006895,Cla009782,Cla002430,Cla004999,Cla013454,Cla005589,Cla015908
GO:0019362	pyridine nucleotide metabolic process	biological_process	0.00012278	0.0071791	19	2218	55	15506	Cla018361,Cla019014,Cla004216,Cla008191,Cla014418,Cla005491,Novel01119,Cla018362,Cla010932,Cla003122,Cla017722,Cla003339,Cla018367,Cla013455,Cla022499,Cla004847,Cla003902,Cla022170,Cla022882
GO:0046496	nicotinamide nucleotide metabolic process	biological_process	0.00012278	0.0071791	19	2218	55	15506	Cla004216,Cla008191,Cla014418,Cla005491,Cla018361,Cla019014,Cla017722,Cla003339,Cla013455,Cla018367,Cla022499,Cla018362,Novel01119,Cla010932,Cla003122,Cla004847,Cla003902,Cla022170,Cla022882
GO:0019725	cellular homeostasis	biological_process	0.000124	0.0071791	39	2218	145	15506	Cla002517,Cla019374,Cla010417,Cla005157,Novel00411,Cla015124,Cla004196,Cla007239,Cla022408,Cla002178,Cla009256,Cla006447,Cla020056,Cla022024,Cla017688,Cla022682,Cla001793,Cla005031,Cla011786,Cla014389,Cla017037,Cla022460,Cla016436,Cla008341,Novel00317,Cla011902,Cla020798,Cla022051,Cla022397,Cla009615,Cla020547,Cla007427,Cla021430,Cla014150,Cla013509,Cla000129,Cla018660,Cla003456,Cla021209
GO:0009523	photosystem II	cellular_component	0.00013207	0.0075485	23	2218	73	15506	Cla022278,Cla004703,Cla023217,Cla004698,Cla016851,Cla015233,Cla020164,Cla009281,Cla003429,Cla006317,Cla007831,Cla012447,Cla004704,Cla004819,Cla005420,Cla007062,Cla004905,Cla022723,Cla001954,Cla010961,Cla002582,Cla007370,Cla014815
GO:0006732	coenzyme metabolic process	biological_process	0.00013734	0.0077501	39	2218	151	15506	Cla010932,Cla002350,Cla018362,Cla022499,Cla010547,Cla018367,Cla013455,Cla019014,Cla018361,Cla011094,Cla003989,Cla017988,Cla008501,Cla022170,Cla003902,Cla007239,Cla003122,Novel01119,Cla003339,Cla015723,Cla014068,Cla004584,Cla017722,Cla016386,Cla001204,Cla015001,Cla005491,Cla014854,Cla007102,Cla014418,Cla008191,Cla021256,Cla004284,Cla004216,Cla019814,Cla022882,Cla009745,Cla021251,Cla004847
GO:0008839	4-hydroxy-tetrahydrodipicolinate reductase	molecular_function	0.0001395	0.0077736	10	2218	19	15506	Cla015908,Cla015968,Cla016328,Cla006895,Cla009763,Cla006530,Cla019110,Cla004999,Cla013454,Cla002430
GO:0016052	carbohydrate catabolic process	biological_process	0.00014348	0.0078967	23	2218	74	15506	Cla017722,Cla022499,Cla018367,Cla003339,Cla013455,Novel01119,Cla018362,Cla003122,Cla008191,Cla004216,Cla003262,Cla005491,Cla014418,Cla018361,Cla019014,Cla022882,Cla013639,Cla012154,Cla008834,Cla004847,Cla022170,Cla016671,Cla003902
GO:0005525	GTP binding	molecular_function	0.00015049	0.0081814	77	2218	379	15506	Cla010079,Cla018835,Cla003959,Cla006103,Cla016921,Cla018758,Cla008577,Cla023215,Cla014899,Cla005375,Cla018885,Cla019645,Cla016137,Cla021997,Cla007820,Cla002350,Cla008897,Cla007817,Cla014303,Cla009580,Cla020551,Cla006484,Cla020916,Cla022844,Cla011016,Cla000465,Cla019885,Cla005387,Cla004220,Cla012810,Cla022303,Cla013433,Cla021367,Cla009259,Cla009816,Cla022698,Cla017875,Cla017255,Cla021016,Cla019958…
GO:0009067	aspartate family amino acid biosynthetic process	biological_process	0.0001538	0.0082607	15	2218	38	15506	Cla017149,Cla015908,Cla002903,Cla016328,Cla006895,Cla015968,Cla006530,Cla009763,Cla019110,Cla014751,Cla004999,Cla013454,Cla017148,Cla002430,Cla021970
GO:0032561	guanyl ribonucleotide binding	molecular_function	0.00016657	0.0088403	77	2218	380	15506	Cla017215,Cla008058,Cla005549,Cla003578,Cla023227,Cla023341,Cla005603,Cla003084,Cla019235,Cla016336,Cla019070,Cla009157,Cla023201,Cla019125,Cla015527,Cla021256,Cla022628,Cla018469,Cla010285,Cla019958,Cla009946,Cla021016,Cla017255,Cla017875,Cla012278,Cla005583,Cla021357,Cla008501,Cla010071,Cla019176,Cla007828,Cla008972,Cla014131,Cla013732,Cla020249,Cla010704,Cla018848,Cla001020,Cla002353,Cla019602…
GO:0004386	helicase activity	molecular_function	0.00017299	0.0090728	50	2218	228	15506	Cla008501,Cla020787,Cla005583,Cla012278,Cla015802,Cla022984,Cla022698,Cla004874,Cla006509,Cla018198,Cla017202,Cla007828,Cla005201,Cla017036,Cla011367,Cla020455,Cla007398,Cla017808,Cla008438,Cla002350,Cla016736,Cla019316,Cla005133,Cla014303,Cla009580,Cla014239,Cla001020,Cla003084,Cla012813,Cla013457,Cla023341,Cla017037,Cla003535,Cla004257,Cla015315,Cla023201,Cla019070,Cla006812,Cla018469,Cla004278…
GO:0017111	nucleoside-triphosphatase activity	molecular_function	0.00018227	0.0094486	123	2218	676	15506	Cla021378,Cla004220,Cla005387,Cla017036,Cla005012,Cla000667,Cla017202,Cla011016,Cla006509,Cla018198,Cla019885,Cla022984,Cla017266,Cla021398,Cla022698,Cla009259,Cla009816,Cla012810,Cla013433,Cla021131,Cla014303,Cla019316,Cla005133,Cla009670,Cla014239,Cla009580,Cla012972,Cla008897,Cla002350,Cla005619,Cla015497,Cla007817,Cla016736,Cla020963,Cla015238,Cla020455,Cla007398,Cla022844,Cla015898,Cla014899…
GO:0009085	lysine biosynthetic process	biological_process	0.00019562	0.0097987	11	2218	23	15506	Cla015908,Cla002430,Cla004999,Cla013454,Cla014751,Cla019110,Cla009763,Cla006530,Cla016328,Cla006895,Cla015968
GO:0009089	lysine biosynthetic process via diaminopimelate	biological_process	0.00019562	0.0097987	11	2218	23	15506	Cla004999,Cla013454,Cla002430,Cla009763,Cla006530,Cla016328,Cla006895,Cla015968,Cla014751,Cla019110,Cla015908
GO:0046451	diaminopimelate metabolic process	biological_process	0.00019562	0.0097987	11	2218	23	15506	Cla006530,Cla009763,Cla015968,Cla016328,Cla006895,Cla014751,Cla019110,Cla013454,Cla004999,Cla002430,Cla015908
GO:0019001	guanyl nucleotide binding	molecular_function	0.00019831	0.0098227	77	2218	382	15506	Cla003084,Cla005603,Cla023227,Cla023341,Cla017215,Cla008058,Cla003578,Cla005549,Cla019125,Cla023201,Cla016336,Cla009157,Cla019070,Cla019235,Cla010285,Cla018469,Cla022628,Cla021256,Cla015527,Cla017875,Cla021016,Cla017255,Cla019958,Cla009946,Cla021357,Cla008501,Cla010071,Cla019176,Cla005583,Cla012278,Cla014131,Cla008972,Cla007828,Cla018848,Cla010704,Cla013732,Cla020249,Cla000798,Cla019602,Cla001020…
GO:0044723	single-organism carbohydrate metabolic process	biological_process	0.00020473	0.01003	74	2218	356	15506	Cla012748,Cla021407,Cla004473,Cla008325,Cla013455,Cla012972,Cla018367,Cla023338,Cla000921,Cla008385,Cla018362,Cla023084,Cla012973,Cla003902,Novel01098,Cla008123,Cla016115,Cla013639,Cla020558,Cla005491,Cla014418,Cla017384,Cla016861,Cla003320,Cla003339,Cla015603,Cla017722,Cla010079,Novel01119,Cla022078,Cla011371,Cla008977,Cla008834,Cla021734,Cla004847,Cla007664,Cla011131,Cla022337,Cla005076,Cla0160…
GO:0032787	monocarboxylic acid metabolic process	biological_process	0.00021247	0.010296	46	2218	191	15506	Cla005852,Cla008389,Cla004167,Cla011810,Cla004216,Cla011561,Cla008191,Cla016673,Cla014418,Cla021364,Cla005491,Novel01119,Cla003122,Cla017722,Cla003339,Cla009294,Cla001251,Cla004847,Cla013862,Cla007303,Cla009256,Cla002601,Cla015621,Cla022882,Cla017158,Cla018361,Cla019014,Cla020408,Cla018129,Cla016243,Cla018362,Cla003665,Cla004597,Cla007434,Cla018367,Cla013455,Cla010547,Cla012602,Cla022499,Cla02143…
GO:0016627	oxidoreductase activity, acting on the CH-CH group of donors	molecular_function	0.00023557	0.011292	33	2218	121	15506	Cla020476,Cla006895,Cla015968,Cla010547,Novel00268,Cla003665,Cla007434,Cla020208,Cla016672,Cla019110,Cla009763,Cla016328,Cla017988,Cla009782,Cla002430,Cla005450,Cla008642,Cla015908,Cla016673,Cla004284,Cla002517,Cla004245,Cla006332,Cla020464,Cla018460,Cla013454,Cla018438,Cla006530,Cla017273,Cla001251,Cla004999,Cla022704,Cla018002
GO:0009066	aspartate family amino acid metabolic process	biological_process	0.0002451	0.011624	16	2218	44	15506	Cla021970,Cla013454,Cla017148,Cla014751,Cla015968,Cla006895,Cla002903,Cla002430,Cla004999,Cla019110,Cla016328,Cla010611,Cla006530,Cla009763,Cla015908,Cla017149
GO:0016818	hydrolase activity, acting on acid anhydrides, in phosphorus-containing anhydrides	molecular_function	0.00025844	0.012128	140	2218	783	15506	Cla017266,Cla009259,Cla022698,Cla021398,Cla021378,Cla005387,Cla004220,Cla000667,Cla017202,Cla005012,Cla018198,Cla006509,Cla011016,Cla012942,Cla020455,Cla020963,Cla015238,Cla018245,Cla010171,Cla019316,Cla009670,Cla014239,Cla012972,Cla008897,Cla016736,Cla007817,Cla005619,Cla012104,Cla021997,Cla005375,Cla010722,Cla019199,Cla006735,Cla006761,Cla014899,Cla002913,Cla014422,Cla010413,Cla004278,Cla009035…
GO:0002949	tRNA threonylcarbamoyladenosine modification	biological_process	0.00031757	0.014595	21	2218	72	15506	Cla023201,Cla004257,Cla020337,Cla005201,Cla005583,Cla008501,Cla003084,Cla010071,Cla004874,Cla004905,Cla016736,Cla008438,Cla017808,Cla018314,Cla002747,Cla014303,Cla011367,Cla009035,Cla004278,Cla012284,Cla014216
GO:0070525	tRNA threonylcarbamoyladenosine metabolic process	biological_process	0.00031757	0.014595	21	2218	72	15506	Cla004874,Cla005583,Cla010071,Cla003084,Cla008501,Cla005201,Cla020337,Cla004257,Cla023201,Cla014216,Cla012284,Cla009035,Cla011367,Cla004278,Cla002747,Cla018314,Cla014303,Cla016736,Cla004905,Cla017808,Cla008438
GO:0008652	cellular amino acid biosynthetic process	biological_process	0.00034045	0.015487	38	2218	151	15506	Cla016673,Cla014751,Cla004284,Cla004245,Cla021970,Cla016577,Cla017148,Cla013454,Cla014068,Cla016386,Cla006530,Cla017273,Cla008809,Cla021251,Cla004999,Novel01117,Cla005344,Cla006895,Cla015968,Cla016264,Cla018253,Cla002202,Cla013776,Cla010547,Novel00268,Cla002903,Cla016672,Cla019110,Cla009410,Cla009763,Cla016328,Cla017988,Cla009782,Cla002430,Cla017149,Novel00792,Cla003989,Cla015908
GO:0007034	vacuolar transport	biological_process	0.00037622	0.016941	8	2218	14	15506	Cla018195,Cla011241,Cla011177,Cla016818,Cla015555,Novel01098,Cla005853,Cla015603
GO:0009057	macromolecule catabolic process	biological_process	0.00039217	0.017483	43	2218	181	15506	Cla023283,Cla022476,Cla015127,Cla006966,Cla016667,Cla012513,Cla017222,Cla018240,Cla022241,Cla021609,Cla018514,Cla005612,Cla000199,Cla014185,Cla018469,Cla021999,Cla018314,Cla010280,Cla013158,Cla016611,Cla016926,Cla016671,Cla000555,Cla014339,Cla010434,Cla008908,Cla018172,Cla015515,Cla004613,Cla015822,Cla015537,Cla008915,Cla003262,Cla013919,Cla004612,Cla012168,Cla012532,Cla020697,Cla001903,Cla006584…
GO:0072524	pyridine-containing compound metabolic process	biological_process	0.00040353	0.017811	20	2218	64	15506	Cla003902,Cla022170,Cla004847,Cla017988,Cla022882,Cla014418,Cla005491,Cla004216,Cla008191,Cla019014,Cla018361,Cla013455,Cla003339,Cla018367,Cla022499,Cla017722,Cla003122,Novel01119,Cla018362,Cla010932
GO:0009056	catabolic process	biological_process	0.00043731	0.019113	107	2218	544	15506	Cla018240,Cla013617,Cla022241,Cla016667,Cla012513,Cla004999,Cla001251,Cla017877,Cla006966,Cla021734,Cla008834,Cla015127,Cla004847,Cla013158,Novel01119,Cla006031,Cla010280,Cla018314,Cla014927,Cla003339,Cla017722,Cla000199,Cla008089,Cla018433,Cla009478,Cla005491,Cla016465,Cla014418,Cla016673,Cla015822,Cla022235,Cla016041,Cla008915,Cla018172,Cla000667,Cla013639,Cla021934,Cla022306,Cla016926,Cla01667…
GO:0003724	RNA helicase activity	molecular_function	0.00047248	0.02045	31	2218	126	15506	Cla021016,Cla016736,Cla017808,Cla008438,Cla001020,Cla002747,Cla018314,Cla014239,Cla009580,Cla014303,Cla011367,Cla009035,Cla004278,Cla006812,Cla012284,Cla014216,Cla023201,Cla004257,Cla015315,Cla003535,Cla017037,Cla017036,Cla005201,Cla007828,Cla005583,Cla020787,Cla003084,Cla004874,Cla022984,Cla012278,Cla023341
GO:0009654	photosystem II oxygen evolving complex	cellular_component	0.00048044	0.020594	11	2218	25	15506	Cla007062,Cla022278,Cla004703,Cla004698,Cla023217,Cla020164,Cla015233,Cla007831,Cla010961,Cla004704,Cla005420
GO:0042592	homeostatic process	biological_process	0.00050615	0.02149	42	2218	172	15506	Novel00317,Cla008341,Cla016436,Cla022460,Cla002350,Cla022397,Cla022051,Cla020798,Cla011902,Cla007427,Cla021430,Cla020547,Cla009615,Cla021209,Cla003456,Cla000129,Novel00448,Cla018660,Cla014150,Cla013509,Cla010417,Cla019374,Cla002517,Cla022408,Cla002178,Cla004196,Cla015124,Cla007239,Cla005157,Novel00411,Cla022682,Cla001793,Cla022024,Cla017688,Cla020056,Cla006447,Cla009256,Cla017037,Cla014389,Cla011…
GO:0051082	unfolded protein binding	molecular_function	0.00055083	0.023166	26	2218	93	15506	Cla022333,Cla001404,Cla002648,Cla005206,Cla013730,Cla003885,Cla019606,Cla019797,Cla018081,Cla020965,Cla012748,Novel00738,Cla011357,Cla004490,Cla000667,Cla003604,Cla018406,Cla005202,Cla004826,Novel00364,Cla021429,Cla019498,Cla011799,Cla005871,Cla005204,Cla021734
GO:0016817	hydrolase activity, acting on acid anhydrides	molecular_function	0.00056234	0.023429	147	2218	843	15506	Cla016980,Cla014222,Cla023201,Cla017037,Cla017215,Cla018195,Cla012813,Cla005603,Cla003774,Cla021016,Cla004905,Cla003129,Cla012105,Cla015527,Cla012284,Cla021256,Cla009612,Cla014216,Cla018469,Cla020815,Cla007828,Cla009889,Cla012278,Cla014452,Cla020787,Cla005130,Cla008501,Cla001020,Cla013730,Cla013668,Cla008438,Cla020249,Cla011177,Cla016531,Cla011367,Cla015604,Cla006735,Cla019199,Cla006761,Cla014899…
GO:0042651	thylakoid membrane	cellular_component	0.00059532	0.024269	12	2218	30	15506	Cla020164,Cla015233,Cla007062,Cla022278,Cla004703,Cla023217,Cla004698,Cla004704,Cla005420,Cla007831,Cla010961,Cla001947
GO:1901607	alpha-amino acid biosynthetic process	biological_process	0.00059713	0.024269	33	2218	128	15506	Cla016328,Cla009410,Cla009763,Cla019110,Cla016672,Cla002430,Cla017988,Cla009782,Cla017149,Cla015908,Cla003989,Cla015968,Cla006895,Cla010547,Cla018253,Cla002903,Novel00268,Cla008809,Cla017273,Cla006530,Cla021251,Cla004999,Novel01117,Cla004245,Cla016673,Cla004284,Cla014751,Cla013454,Cla016577,Cla017148,Cla021970,Cla016386,Cla014068
GO:0046933	proton-transporting ATP synthase activity, rotational mechanism	molecular_function	0.00059884	0.024269	8	2218	15	15506	Cla014452,Cla003774,Cla015238,Cla017266,Cla015497,Cla019380,Cla021131,Cla021378
GO:0006553	lysine metabolic process	biological_process	0.00064776	0.026016	11	2218	26	15506	Cla015908,Cla006895,Cla016328,Cla015968,Cla006530,Cla009763,Cla019110,Cla014751,Cla013454,Cla004999,Cla002430
GO:0003735	structural constituent of ribosome	molecular_function	0.00066482	0.026462	74	2218	345	15506	Cla015108,Cla016438,Cla023167,Cla017246,Cla003293,Cla016577,Cla023235,Cla012232,Cla017411,Cla008555,Cla013050,Cla004063,Cla020737,Cla000829,Cla011721,Cla002793,Cla017600,Cla007069,Cla001766,Cla007673,Cla004837,Novel00485,Cla007020,Cla004950,Cla004702,Cla023264,Cla018917,Cla021113,Cla014273,Cla003456,Cla005395,Cla019068,Cla017099,Cla006976,Cla015452,Novel00652,Cla005606,Cla005343,Cla019529,Cla0107…
GO:0019829	cation-transporting ATPase activity	molecular_function	0.00073149	0.028605	9	2218	19	15506	Cla021378,Cla021131,Cla005619,Cla015497,Cla019380,Cla017266,Cla015238,Cla014452,Cla003774
GO:0042625	ATPase activity, coupled to transmembrane movement of ions	molecular_function	0.00073149	0.028605	9	2218	19	15506	Cla014452,Cla003774,Cla015238,Cla017266,Cla015497,Cla005619,Cla019380,Cla021131,Cla021378
GO:0003678	DNA helicase activity	molecular_function	0.00078717	0.030515	37	2218	165	15506	Cla014303,Cla014239,Cla002350,Cla017808,Cla008438,Cla016736,Cla007398,Cla011367,Cla017036,Cla005201,Cla017202,Cla006509,Cla018198,Cla022984,Cla015802,Cla004874,Cla008501,Cla005583,Cla020787,Cla002747,Cla018314,Cla004905,Cla021016,Cla012284,Cla002913,Cla014216,Cla009612,Cla004278,Cla006812,Cla009035,Cla017037,Cla004257,Cla015315,Cla023341,Cla003084,Cla012813,Cla013457
GO:0019201	nucleotide kinase activity	molecular_function	0.00079738	0.030644	13	2218	36	15506	Cla009580,Cla019316,Cla008577,Cla004490,Cla003535,Cla004881,Cla004874,Cla007820,Cla007102,Cla008501,Cla004278,Cla006261,Cla001468
GO:1901137	carbohydrate derivative biosynthetic process	biological_process	0.00081558	0.031076	56	2218	257	15506	Cla010295,Cla019971,Cla003005,Cla005994,Cla017266,Cla014452,Novel01098,Cla008501,Cla021378,Cla016167,Cla020558,Cla006940,Cla016840,Cla019834,Cla000539,Cla008978,Cla012748,Cla015238,Cla021407,Cla008325,Cla023338,Cla021131,Cla020517,Cla000921,Cla020432,Cla015497,Cla019380,Cla008385,Cla008975,Cla007689,Cla004918,Cla008977,Cla021734,Cla007664,Cla022337,Cla005076,Cla003774,Cla016014,Cla020164,Novel004…
GO:0044711	single-organism biosynthetic process	biological_process	0.00087267	0.032969	162	2218	901	15506	Cla023248,Cla005344,Cla006895,Cla004473,Cla020408,Cla021407,Cla002202,Cla021131,Cla005133,Cla018764,Cla009297,Cla023084,Cla012973,Cla016243,Cla002903,Cla015497,Cla016672,Cla012753,Cla002430,Cla019109,Cla004332,Cla015963,Cla003989,Cla005471,Cla017384,Cla004284,Cla011561,Cla006797,Cla016861,Cla007102,Cla002517,Cla008389,Cla011595,Cla005852,Cla021970,Cla003320,Cla009347,Cla021734,Cla021873,Cla020047…
GO:0016810	hydrolase activity, acting on carbon-nitrogen (but not peptide) bonds	molecular_function	0.0008855	0.033173	15	2218	44	15506	Cla003928,Cla005853,Cla014409,Cla000194,Novel01117,Cla023338,Cla007442,Cla001092,Cla016041,Cla017500,Cla012919,Cla011799,Cla001090,Cla019021,Cla001216
GO:0009058	biosynthetic process	biological_process	0.0009234	0.034304	559	2218	3492	15506	Cla009557,Cla004597,Cla015498,Cla013766,Cla010875,Cla006484,Cla018129,Cla021934,Cla021378,Cla020558,Cla005450,Cla008123,Cla021845,Cla017266,Cla003005,Cla007837,Cla016328,Cla019971,Cla013971,Cla008294,Cla009062,Cla014751,Cla003600,Cla021037,Cla015621,Novel00471,Cla021320,Cla000813,Cla004936,Cla022337,Cla008809,Cla021991,Cla022679,Cla008863,Cla020930,Cla007656,Cla005690,Cla012739,Cla005637,Cla00702…
GO:0044769	ATPase activity, coupled to transmembrane movement of ions, rotational mechanism	molecular_function	0.0010559	0.038904	8	2218	16	15506	Cla014452,Cla003774,Cla017266,Cla015238,Cla019380,Cla015497,Cla021378,Cla021131
GO:0006457	protein folding	biological_process	0.0011118	0.040626	29	2218	111	15506	Cla011138,Cla003885,Cla019606,Cla019797,Novel01222,Cla005340,Cla013362,Cla012094,Cla007006,Cla012773,Cla001404,Cla002648,Cla001502,Cla005206,Cla013730,Cla005202,Cla018153,Cla005341,Cla007031,Cla005204,Cla005871,Cla012065,Cla021734,Cla014903,Cla011357,Cla017086,Cla016440,Cla014165,Cla013600
GO:0051287	NAD binding	molecular_function	0.0011373	0.04122	34	2218	137	15506	Cla010547,Cla012602,Cla011995,Cla002202,Cla019193,Cla005671,Cla007434,Cla010932,Cla015968,Cla015028,Cla010898,Cla015908,Cla004157,Cla015027,Cla011799,Cla019110,Cla016672,Cla021327,Cla007831,Cla014068,Cla008358,Cla004245,Cla004639,Cla016673,Cla013454,Cla016644,Cla016566,Cla000258,Cla009256,Cla006530,Cla007303,Cla004999,Cla004972,Cla001251
GO:0034357	photosynthetic membrane	cellular_component	0.0011624	0.04179	26	2218	99	15506	Cla009181,Cla013856,Cla010961,Cla002582,Cla001947,Cla014815,Cla007370,Cla022723,Cla001954,Cla007062,Cla004905,Cla012447,Cla004704,Cla004819,Cla005420,Cla009281,Cla006317,Cla003429,Cla007831,Cla015233,Cla020164,Cla004703,Cla022278,Cla023217,Cla004698,Cla016851
GO:0005840	ribosome	cellular_component	0.0011829	0.042188	73	2218	347	15506	Cla019529,Cla018755,Cla009062,Cla003600,Cla004317,Cla004291,Cla004936,Cla005950,Cla014885,Cla019026,Cla014211,Cla010411,Cla013241,Cla007019,Cla020784,Cla021734,Cla017279,Cla004031,Cla004983,Cla005436,Cla010333,Cla003572,Cla005686,Novel00335,Cla017849,Cla017996,Cla012674,Cla007616,Cla016086,Novel01098,Cla013782,Cla021845,Cla013971,Cla023167,Cla015108,Cla016438,Cla017246,Cla016577,Cla023235,Cla0174…
GO:0019205	nucleobase-containing compound kinase activity	molecular_function	0.0012853	0.045279	15	2218	46	15506	Cla009580,Cla019316,Cla008577,Cla004490,Cla013670,Cla003535,Cla004881,Cla007820,Cla007102,Cla004874,Cla009043,Cla001468,Cla008501,Cla006261,Cla004278
GO:0009521	photosystem	cellular_component	0.0012899	0.045279	25	2218	94	15506	Cla009281,Cla007831,Cla006317,Cla003429,Cla012447,Cla004819,Cla005420,Cla004704,Cla023217,Cla004698,Cla022278,Cla004703,Cla016851,Cla015233,Cla020164,Cla002582,Cla010961,Cla007370,Cla014815,Cla013856,Cla009181,Cla004905,Cla007062,Cla022723,Cla001954
GO:0008134	transcription factor binding	molecular_function	0.0014719	0.051265	29	2218	121	15506	Cla017444,Cla004257,Cla004343,Cla005201,Cla017202,Cla019070,Cla013457,Cla013433,Cla005583,Cla003084,Cla021357,Cla022698,Cla004874,Cla016736,Cla021016,Cla017808,Cla008438,Cla008897,Cla002747,Cla018314,Cla009670,Cla013730,Cla015898,Cla009035,Cla009910,Novel01170,Cla004278,Cla014216,Cla012284
GO:0008033	tRNA processing	biological_process	0.001536	0.053082	53	2218	252	15506	Cla022230,Cla009256,Cla017273,Cla015465,Cla010098,Cla001251,Cla003084,Cla012928,Cla005283,Cla023201,Cla002818,Cla014389,Cla004257,Cla003535,Cla014422,Cla004245,Cla002517,Cla012284,Cla014216,Cla011810,Cla018407,Cla009035,Cla004278,Cla014518,Cla003751,Cla002747,Cla018314,Cla018438,Cla004905,Cla008371,Cla020915,Cla004874,Cla013695,Cla005050,Cla019109,Cla005583,Cla008501,Cla021430,Cla017988,Cla010071…
GO:0006511	ubiquitin-dependent protein catabolic process	biological_process	0.001603	0.05497	21	2218	75	15506	Cla013158,Cla017808,Cla018314,Cla015617,Cla020697,Cla005612,Cla006584,Cla012532,Cla012168,Cla004612,Cla004613,Cla015822,Cla017222,Cla008915,Cla018172,Cla016667,Cla008908,Cla023283,Cla016611,Cla016926,Cla022476
GO:1990204	oxidoreductase complex	cellular_component	0.0016446	0.055968	14	2218	41	15506	Cla011555,Cla004698,Cla023217,Cla022278,Cla004703,Cla007062,Cla020164,Cla015233,Cla020955,Cla007831,Cla010961,Cla005420,Cla004704,Cla017692
GO:1901605	alpha-amino acid metabolic process	biological_process	0.0016826	0.056825	40	2218	174	15506	Cla006530,Cla017273,Cla008809,Cla010611,Cla004999,Cla021251,Novel01117,Cla004245,Cla016673,Cla014751,Cla004284,Cla016577,Cla017148,Cla013454,Cla008324,Cla021970,Cla014068,Cla016386,Cla009410,Cla009763,Cla016328,Cla016672,Cla019110,Cla009782,Cla017988,Cla002430,Cla017149,Cla021934,Cla015908,Cla005471,Cla016041,Cla003989,Cla006895,Cla015968,Cla010547,Cla018253,Cla020432,Cla002903,Cla005589,Novel002…
GO:0034660	ncRNA metabolic process	biological_process	0.0017302	0.057994	76	2218	393	15506	Cla023201,Cla014389,Cla003535,Cla020469,Cla021742,Cla005137,Cla003084,Cla022230,Cla017273,Cla009256,Cla015465,Cla004905,Cla008371,Cla019188,Cla007788,Novel00587,Cla012284,Cla014216,Cla020337,Cla005201,Cla005583,Cla003471,Cla008501,Cla010071,Cla004874,Cla005637,Cla005671,Cla020930,Cla008438,Cla017808,Cla001502,Cla004901,Cla007969,Cla011367,Cla011228,Cla016761,Cla015725,Cla002818,Cla004317,Cla00425…
GO:0045454	cell redox homeostasis	biological_process	0.0017613	0.058465	30	2218	117	15506	Cla003456,Cla011786,Cla000129,Cla013509,Cla005031,Cla021430,Cla001793,Cla007427,Cla022682,Cla017688,Cla006447,Cla020547,Cla020056,Cla009615,Cla009256,Cla022397,Cla002178,Cla022408,Cla015124,Cla004196,Cla022051,Cla005157,Cla020798,Cla011902,Cla010417,Novel00317,Cla019374,Cla016436,Cla022460,Cla002517
GO:0009100	glycoprotein metabolic process	biological_process	0.0017836	0.058465	20	2218	71	15506	Cla004918,Cla022078,Cla008385,Cla007689,Cla023338,Cla020517,Cla000921,Cla008325,Cla015603,Cla008978,Novel00903,Cla020743,Cla020558,Cla016014,Cla005076,Cla022337,Cla007664,Cla005994,Cla010295,Cla008977
GO:0009101	glycoprotein biosynthetic process	biological_process	0.0017836	0.058465	20	2218	71	15506	Cla010295,Cla008977,Cla007664,Cla005994,Cla022337,Cla005076,Cla016014,Cla020558,Cla020743,Novel00903,Cla008978,Cla015603,Cla008325,Cla023338,Cla020517,Cla000921,Cla008385,Cla007689,Cla022078,Cla004918
GO:0007264	small GTPase mediated signal transduction	biological_process	0.0017995	0.058555	32	2218	132	15506	Cla011536,Cla022628,Cla019958,Cla017875,Cla010079,Cla021016,Cla017255,Cla016137,Cla021997,Cla005375,Cla019645,Cla005603,Cla016336,Cla009157,Cla014899,Cla023215,Cla010704,Cla013732,Cla020249,Cla022844,Cla001020,Cla000798,Cla007817,Cla012278,Cla009259,Cla019176,Cla010071,Cla022303,Cla008972,Cla011016,Cla019885,Cla014131
GO:0004665	prephenate dehydrogenase (NADP+) activity	molecular_function	0.0018443	0.058728	4	2218	5	15506	Cla016672,Cla016673,Cla004999,Novel00268
GO:0006571	tyrosine biosynthetic process	biological_process	0.0018443	0.058728	4	2218	5	15506	Cla016672,Cla016673,Cla004999,Novel00268
GO:0008977	prephenate dehydrogenase activity	molecular_function	0.0018443	0.058728	4	2218	5	15506	Novel00268,Cla004999,Cla016673,Cla016672
GO:0019941	modification-dependent protein catabolic process	biological_process	0.0019436	0.061019	21	2218	76	15506	Cla023283,Cla016611,Cla022476,Cla016926,Cla008908,Cla018172,Cla016667,Cla004613,Cla017222,Cla015822,Cla008915,Cla004612,Cla012168,Cla012532,Cla005612,Cla020697,Cla006584,Cla018314,Cla015617,Cla013158,Cla017808
GO:0043632	modification-dependent macromolecule catabolic process	biological_process	0.0019436	0.061019	21	2218	76	15506	Cla006584,Cla020697,Cla005612,Cla012168,Cla004612,Cla012532,Cla017808,Cla013158,Cla018314,Cla015617,Cla008908,Cla016611,Cla023283,Cla016926,Cla022476,Cla008915,Cla004613,Cla015822,Cla017222,Cla018172,Cla016667
GO:0016628	oxidoreductase activity, acting on the CH-CH group of donors, NAD or NADP as acceptor	molecular_function	0.001963	0.061197	21	2218	75	15506	Cla004245,Cla006895,Cla015968,Cla002517,Cla016673,Cla004284,Cla020476,Cla013454,Cla010547,Cla007434,Novel00268,Cla006530,Cla009763,Cla016328,Cla016672,Cla019110,Cla022704,Cla004999,Cla001251,Cla002430,Cla015908
GO:0006486	protein glycosylation	biological_process	0.0020949	0.064315	19	2218	67	15506	Cla004918,Cla022078,Cla008385,Cla007689,Cla023338,Cla000921,Cla015603,Cla008325,Cla008978,Cla020743,Novel00903,Cla020558,Cla016014,Cla005076,Cla022337,Cla005994,Cla007664,Cla010295,Cla008977
GO:0043413	macromolecule glycosylation	biological_process	0.0020949	0.064315	19	2218	67	15506	Cla005076,Cla022337,Cla007664,Cla005994,Cla010295,Cla008977,Cla008978,Cla020743,Novel00903,Cla020558,Cla016014,Cla004918,Cla022078,Cla008385,Cla007689,Cla023338,Cla000921,Cla008325,Cla015603
GO:0004177	aminopeptidase activity	molecular_function	0.0021063	0.064315	11	2218	30	15506	Cla019919,Cla020010,Cla017396,Cla001925,Cla012758,Cla019571,Cla010405,Cla009630,Cla019981,Cla019264,Cla022235
GO:0009579	thylakoid	cellular_component	0.0022804	0.068689	27	2218	109	15506	Cla009281,Cla007831,Cla006317,Cla003429,Cla012447,Cla004819,Cla005420,Cla004704,Cla023217,Cla004698,Cla004703,Cla022278,Cla016851,Cla015233,Cla020164,Cla002582,Cla010961,Cla001947,Cla014815,Cla013485,Cla007370,Cla009181,Cla013856,Cla004905,Cla007062,Cla022723,Cla001954
GO:0044436	thylakoid part	cellular_component	0.0022804	0.068689	27	2218	109	15506	Cla007062,Cla004905,Cla001954,Cla022723,Cla013485,Cla014815,Cla007370,Cla002582,Cla010961,Cla001947,Cla013856,Cla009181,Cla016851,Cla004703,Cla022278,Cla004698,Cla023217,Cla020164,Cla015233,Cla006317,Cla003429,Cla007831,Cla009281,Cla004704,Cla005420,Cla004819,Cla012447
GO:0036094	small molecule binding	molecular_function	0.0024308	0.072728	382	2218	2498	15506	Cla004158,Cla017212,Cla014786,Cla013454,Cla022628,Cla005151,Cla019188,Cla006812,Cla016644,Cla009946,Cla019958,Cla009301,Cla020279,Cla017255,Cla008058,Cla005549,Cla009847,Cla006997,Cla019070,Cla021742,Cla019125,Cla003535,Cla007518,Cla015968,Cla015725,Cla019855,Cla001947,Cla005340,Cla002691,Cla020214,Cla000798,Cla017808,Cla010932,Cla004874,Cla019110,Cla018694,Cla005807,Cla010596,Cla005583,Cla019909…
GO:0000166	nucleotide binding	molecular_function	0.0026144	0.077184	371	2218	2427	15506	Cla005031,Cla000258,Cla005283,Cla002818,Cla008577,Cla004257,Cla016450,Novel00273,Cla019498,Cla007820,Cla020786,Cla015485,Cla012129,Cla010079,Cla023103,Cla016921,Cla011114,Cla009354,Cla017036,Cla019885,Cla007592,Cla000465,Cla013657,Cla012519,Cla016863,Cla016672,Cla008291,Cla013433,Novel01111,Cla007831,Cla021430,Cla012753,Cla006886,Cla009580,Cla011726,Cla013986,Cla014303,Cla008703,Cla001404,Cla0174…
GO:1901265	nucleoside phosphate binding	molecular_function	0.0026144	0.077184	371	2218	2427	15506	Cla016672,Cla007831,Novel01111,Cla021430,Cla012753,Cla008291,Cla013433,Cla017036,Cla013657,Cla016863,Cla012519,Cla019885,Cla007592,Cla000465,Cla023248,Cla017751,Cla007846,Cla020916,Cla015898,Cla003885,Cla011726,Cla014303,Cla013986,Cla006886,Cla009580,Cla018362,Cla004685,Cla008298,Cla008703,Cla017463,Cla001404,Cla019498,Cla007820,Cla020786,Cla000258,Cla005031,Cla005283,Cla016450,Novel00273,Cla0028…
GO:1901576	organic substance biosynthetic process	biological_process	0.0028291	0.082974	531	2218	3348	15506	Cla000786,Cla008341,Cla004702,Cla004837,Cla022499,Cla020517,Cla019380,Cla018955,Cla014460,Cla007689,Cla017808,Cla022818,Cla001518,Cla008376,Cla004874,Cla012353,Cla021593,Cla005606,Cla020337,Cla008781,Cla006976,Cla019188,Cla013454,Cla020670,Cla009946,Cla017246,Cla015019,Cla011624,Cla022333,Cla015108,Cla002793,Cla010205,Cla020955,Cla017063,Cla006756,Cla019070,Cla006895,Cla015898,Cla005686,Cla017109…
GO:0051186	cofactor metabolic process	biological_process	0.0028905	0.084221	57	2218	275	15506	Cla019014,Cla018361,Cla011094,Cla020476,Cla010253,Cla007434,Cla020208,Cla002350,Cla018362,Cla010932,Cla010547,Cla018367,Cla013455,Cla022499,Cla005450,Cla022670,Cla008501,Cla017988,Cla003902,Cla007272,Cla022170,Cla010255,Cla003989,Cla015001,Cla018433,Cla014418,Cla006332,Cla002517,Cla004245,Cla007102,Cla014854,Cla005491,Cla002033,Cla016861,Cla004216,Cla008191,Cla021256,Cla004284,Cla003122,Cla007239…
GO:0016616	oxidoreductase activity, acting on the CH-OH group of donors, NAD or NADP as acceptor	molecular_function	0.0029427	0.084708	49	2218	228	15506	Cla021873,Cla004999,Cla001251,Cla009294,Cla009256,Cla007303,Cla015621,Cla015552,Cla008122,Cla000258,Cla015909,Cla016566,Cla004639,Cla006331,Cla016673,Cla008396,Cla004684,Cla009165,Cla008358,Cla014068,Cla015723,Cla001204,Cla021430,Cla022380,Cla002430,Cla009763,Cla015027,Cla021327,Cla016672,Cla016773,Cla019110,Cla015908,Cla000612,Cla007587,Cla010898,Cla015028,Cla004553,Cla016264,Cla015968,Cla006895…
GO:0043168	anion binding	molecular_function	0.0029452	0.084708	374	2218	2447	15506	Cla006484,Cla016842,Cla020963,Cla020455,Cla007817,Cla019193,Cla021830,Cla009670,Cla003171,Cla007714,Cla003005,Cla005050,Cla001017,Cla006736,Cla009259,Cla008301,Cla018198,Cla006509,Cla022496,Cla021934,Cla006791,Cla006188,Cla008113,Cla010413,Cla018530,Cla001321,Cla002913,Cla021037,Cla016465,Cla004245,Cla014422,Cla012636,Cla008070,Cla008720,Cla018835,Cla022293,Cla010722,Cla009281,Cla007229,Cla012104…
GO:0016671	oxidoreductase activity, acting on a sulfur group of donors, disulfide as acceptor	molecular_function	0.0030578	0.087383	6	2218	11	15506	Cla019247,Cla023167,Cla010698,Cla012950,Cla023299,Cla014272
GO:0030118	clathrin coat	cellular_component	0.0031232	0.088296	6	2218	13	15506	Cla013570,Cla022999,Cla011920,Cla008680,Cla012569,Cla018406
GO:0033865	nucleoside bisphosphate metabolic process	biological_process	0.003169	0.088296	8	2218	20	15506	Cla004819,Cla007102,Cla008501,Cla012575,Cla015723,Cla001204,Cla017390,Cla019814
GO:0033875	ribonucleoside bisphosphate metabolic process	biological_process	0.003169	0.088296	8	2218	20	15506	Cla008501,Cla012575,Cla004819,Cla007102,Cla019814,Cla015723,Cla001204,Cla017390
GO:0034032	purine nucleoside bisphosphate metabolic process	biological_process	0.003169	0.088296	8	2218	20	15506	Cla019814,Cla015723,Cla001204,Cla017390,Cla008501,Cla012575,Cla004819,Cla007102
GO:0016614	oxidoreductase activity, acting on CH-OH group of donors	molecular_function	0.0034538	0.095633	53	2218	254	15506	Cla016264,Cla015968,Cla006895,Cla015028,Cla004553,Cla012602,Cla018764,Cla010547,Cla023475,Cla010932,Cla009297,Cla016243,Cla007434,Cla005671,Cla021327,Cla016672,Cla019110,Cla016773,Cla015027,Cla009763,Cla021430,Cla002430,Cla022380,Cla000612,Cla007587,Cla010898,Cla015908,Cla006331,Cla016673,Cla008396,Cla004684,Cla011810,Cla004639,Cla016566,Cla018407,Cla014068,Cla015723,Cla001204,Cla008358,Cla009165…
GO:0008113	peptide-methionine (S)-S-oxide reductase activity	molecular_function	0.0037227	0.10244	3	2218	3	15506	Cla010698,Cla019247,Cla014272
GO:0008233	peptidase activity	molecular_function	0.0037651	0.10297	116	2218	646	15506	Cla013045,Cla021308,Cla018253,Cla004950,Cla006847,Cla005592,Cla009630,Cla020208,Cla008438,Cla016089,Cla002417,Cla012532,Cla012168,Cla011553,Cla002415,Cla013919,Cla001903,Cla015597,Cla005247,Novel00643,Cla009889,Cla013660,Cla019834,Cla004470,Cla004613,Cla015537,Cla021209,Cla004745,Cla020565,Cla020010,Cla008908,Cla020354,Cla022977,Cla018200,Cla003943,Cla004905,Cla023180,Cla011480,Cla019919,Cla00839…
GO:0015979	photosynthesis	biological_process	0.0038211	0.10387	29	2218	124	15506	Cla015233,Cla020164,Cla004698,Cla023217,Cla022278,Cla004703,Cla016851,Cla007720,Cla012447,Cla005420,Cla004819,Cla004704,Cla009281,Cla007831,Cla006317,Cla003429,Cla022723,Cla008210,Cla001954,Cla004905,Cla007062,Cla009181,Cla013856,Cla016861,Cla010961,Cla002582,Cla000199,Cla014815,Cla007370
GO:0042626	ATPase activity, coupled to transmembrane movement of substances	molecular_function	0.0039014	0.10477	20	2218	85	15506	Cla017266,Cla007820,Cla017215,Cla009816,Cla021357,Cla003774,Cla014452,Cla013433,Cla021378,Cla004220,Cla005387,Cla008577,Novel00121,Cla015238,Cla015527,Cla021131,Cla002353,Cla015497,Cla005619,Cla019380
GO:0043492	ATPase activity, coupled to movement of substances	molecular_function	0.0039014	0.10477	20	2218	85	15506	Cla017266,Cla009816,Cla017215,Cla007820,Cla003774,Cla021357,Cla014452,Cla013433,Cla004220,Cla021378,Cla005387,Novel00121,Cla008577,Cla015238,Cla015527,Cla021131,Cla002353,Cla005619,Cla019380,Cla015497
GO:0006807	nitrogen compound metabolic process	biological_process	0.003935	0.10504	627	2218	4023	15506	Cla019109,Cla021436,Cla021147,Cla011799,Cla022984,Cla017996,Cla018574,Cla010549,Cla012674,Cla018178,Cla017849,Novel00335,Cla015838,Cla010793,Cla017299,Cla006978,Cla003262,Cla018275,Cla013455,Cla021131,Cla016385,Cla008736,Cla022075,Cla007972,Cla011131,Cla017279,Cla001090,Cla015315,Cla019814,Cla014028,Cla017080,Cla009692,Cla014855,Cla018433,Cla015001,Cla006616,Cla014732,Cla002517,Cla010694,Cla01381…
GO:0098589	membrane region	cellular_component	0.0043584	0.11565	5	2218	9	15506	Cla013570,Cla011936,Cla011920,Cla008692,Cla018406
GO:0003924	GTPase activity	molecular_function	0.0044015	0.11611	57	2218	300	15506	Cla005375,Cla003084,Cla018885,Cla005603,Cla019645,Cla016137,Cla023341,Cla021734,Cla021997,Cla007820,Cla017215,Cla001823,Cla008577,Cla023201,Cla019125,Cla014899,Cla009157,Cla018469,Cla003959,Cla010285,Cla022628,Cla016921,Cla015527,Cla010079,Cla017255,Cla003129,Cla021016,Cla019958,Cla018835,Cla010071,Cla012810,Cla008501,Cla021357,Cla013433,Cla005583,Cla012278,Cla009816,Cla009259,Cla022698,Cla011016…
GO:0070009	serine-type aminopeptidase activity	molecular_function	0.0045207	0.11833	5	2218	9	15506	Cla019571,Cla019919,Cla010405,Cla009630,Cla022235
GO:0004175	endopeptidase activity	molecular_function	0.0045388	0.11833	74	2218	395	15506	Cla018198,Cla004343,Cla002379,Cla018552,Cla018172,Novel00266,Novel01240,Cla000555,Cla004522,Cla012972,Cla006199,Cla021717,Cla004612,Cla007398,Cla022241,Cla013617,Cla010405,Cla004657,Cla006582,Cla016594,Cla012201,Cla023002,Cla019571,Cla022806,Cla001146,Cla021379,Cla011138,Cla014625,Cla014316,Cla004245,Cla015537,Cla021209,Cla004613,Cla004470,Cla013660,Cla009889,Novel00643,Cla020354,Cla008908,Cla004…
GO:0022804	active transmembrane transporter activity	molecular_function	0.004607	0.11941	42	2218	212	15506	Cla001092,Cla004949,Cla004220,Cla021378,Cla005387,Cla020435,Cla013433,Cla014452,Cla011528,Cla021357,Cla009816,Cla017266,Cla019380,Cla015497,Cla005619,Cla015484,Cla015755,Cla002353,Cla021131,Cla021250,Cla018245,Cla019527,Cla015238,Cla008577,Novel00121,Cla015240,Cla016600,Cla017037,Cla003774,Cla019444,Cla017215,Cla007820,Cla007212,Cla018314,Cla003275,Cla016601,Cla001746,Cla012949,Cla014122,Cla01552…
GO:0044238	primary metabolic process	biological_process	0.0047897	0.12298	960	2218	6387	15506	Cla016009,Cla020457,Cla014854,Cla022644,Cla005675,Cla013653,Cla018514,Cla015598,Cla007788,Cla022882,Cla003300,Cla022077,Cla008555,Cla007745,Cla004819,Cla022476,Cla005137,Cla003084,Cla001897,Novel00404,Cla007696,Cla001925,Cla015323,Cla004626,Cla012038,Cla021308,Cla004564,Cla014032,Cla010547,Cla020543,Cla022431,Cla007673,Cla005671,Cla009327,Cla012168,Cla011228,Cla009910,Novel01170,Cla014407,Novel00…
GO:0070011	peptidase activity, acting on L-amino acid peptides	molecular_function	0.0048001	0.12298	108	2218	601	15506	Cla004657,Cla020799,Cla006582,Cla020858,Cla013617,Cla022241,Novel01117,Cla006489,Cla011178,Cla010405,Cla007643,Cla001146,Cla018433,Cla004795,Cla011138,Cla021379,Cla014316,Cla016960,Cla014625,Cla004245,Cla016661,Cla023002,Cla012201,Cla019571,Cla016594,Cla022806,Novel01240,Cla022306,Novel00266,Cla011434,Cla000555,Cla014138,Cla016961,Cla018198,Cla022235,Cla004343,Cla018552,Cla008838,Cla002379,Cla018…
GO:0098796	membrane protein complex	cellular_component	0.0050554	0.12878	93	2218	512	15506	Cla019380,Cla019297,Cla022686,Cla011094,Cla009181,Cla002582,Cla019797,Novel00643,Cla005247,Cla022440,Cla019834,Cla023217,Cla010292,Cla017692,Cla004704,Cla014452,Cla003429,Cla022977,Cla015019,Cla007062,Cla022333,Cla004905,Novel00965,Cla023286,Cla014389,Cla004703,Cla003644,Cla004698,Cla020816,Cla016851,Cla018195,Cla004819,Novel00688,Cla018895,Cla020955,Cla007696,Cla014100,Cla013992,Cla023166,Cla012…
GO:0006720	isoprenoid metabolic process	biological_process	0.0053952	0.13589	23	2218	94	15506	Cla015797,Cla021318,Cla019109,Cla014654,Cla001251,Cla005283,Cla004566,Cla010898,Cla016840,Cla001148,Novel00212,Cla015621,Cla013777,Cla002818,Cla015963,Cla023248,Cla020476,Cla011810,Cla005033,Cla006743,Cla005133,Cla009348,Cla009347
GO:0008299	isoprenoid biosynthetic process	biological_process	0.0053952	0.13589	23	2218	94	15506	Cla021318,Cla015797,Cla014654,Cla001251,Cla019109,Cla010898,Cla004566,Cla016840,Cla005283,Cla015963,Novel00212,Cla001148,Cla015621,Cla013777,Cla002818,Cla011810,Cla023248,Cla020476,Cla006743,Cla005033,Cla005133,Cla009347,Cla009348
GO:0006400	tRNA modification	biological_process	0.0054966	0.13658	28	2218	124	15506	Cla014303,Cla018314,Cla002747,Cla004901,Cla020915,Cla017808,Cla008438,Cla004905,Cla016736,Cla012284,Cla014216,Cla004278,Cla011367,Cla009035,Cla020337,Cla012928,Cla005201,Cla023201,Cla004257,Cla014389,Cla004874,Cla022230,Cla013695,Cla010098,Cla008501,Cla003084,Cla010071,Cla005583
GO:0015985	energy coupled proton transport, down electrochemical gradient	biological_process	0.0055146	0.13658	20	2218	75	15506	Cla016840,Cla021378,Cla020164,Cla020816,Novel00471,Cla019834,Cla003644,Cla003005,Cla017266,Cla019971,Cla003774,Cla014452,Novel01098,Cla021131,Cla011267,Novel00965,Cla019380,Cla015497,Cla022333,Cla015238
GO:0015986	ATP synthesis coupled proton transport	biological_process	0.0055146	0.13658	20	2218	75	15506	Cla021131,Cla022333,Cla015497,Cla019380,Novel00965,Cla011267,Cla015238,Cla020164,Cla021378,Cla016840,Cla003644,Cla019834,Novel00471,Cla020816,Cla019971,Cla017266,Cla003005,Novel01098,Cla014452,Cla003774
GO:0044249	cellular biosynthetic process	biological_process	0.0057967	0.14277	507	2218	3218	15506	Cla010331,Cla019293,Cla014275,Cla015515,Cla006594,Cla014766,Cla019068,Cla021113,Cla015908,Cla019834,Cla003456,Cla011487,Cla011177,Cla019021,Cla020078,Cla018917,Cla019797,Cla004950,Cla001020,Novel00485,Cla001799,Cla004918,Cla019297,Cla018918,Cla008438,Cla017290,Cla020208,Cla001766,Cla005974,Cla007069,Cla011721,Cla015797,Cla009256,Cla005985,Cla020737,Cla012214,Cla015276,Cla011083,Cla004566,Cla02027…
GO:0065008	regulation of biological quality	biological_process	0.0060446	0.1475	74	2218	383	15506	Cla022682,Cla001793,Cla022024,Cla017615,Cla017688,Cla006447,Cla006524,Cla021734,Cla011936,Cla010405,Cla005031,Cla009478,Cla010580,Cla009901,Cla002517,Cla002178,Cla005157,Cla019571,Novel01240,Cla007427,Cla021430,Cla010900,Cla009615,Cla014248,Cla016791,Cla000129,Novel00448,Cla014150,Cla013509,Cla016436,Cla019113,Cla022460,Cla002350,Cla006678,Cla001954,Cla020798,Cla003276,Cla010875,Cla020056,Cla0092…
GO:0005783	endoplasmic reticulum	cellular_component	0.006086	0.1475	38	2218	177	15506	Cla001677,Cla022724,Cla010538,Cla023338,Cla011902,Cla010295,Novel01098,Cla018660,Cla003394,Cla016167,Cla020558,Cla005247,Novel00643,Cla000539,Novel00173,Cla021209,Cla011357,Cla002093,Cla013527,Cla016465,Cla018469,Cla018210,Cla008829,Novel00411,Cla022977,Cla015603,Cla002648,Cla013328,Cla010745,Cla009165,Cla015124,Cla018436,Cla018195,Cla001251,Cla005076,Cla008837,Novel00273,Cla007737
GO:0004602	glutathione peroxidase activity	molecular_function	0.0061099	0.1475	6	2218	13	15506	Cla010856,Cla021039,Cla005157,Cla012354,Cla014745,Cla011456
GO:0071704	organic substance metabolic process	biological_process	0.0061212	0.1475	1003	2218	6697	15506	Cla008341,Cla021684,Cla004702,Cla005340,Cla019299,Cla009377,Cla000786,Cla011553,Cla010253,Cla007006,Cla014460,Cla019380,Cla018955,Cla007689,Cla020689,Cla022818,Cla017808,Cla001518,Cla003665,Cla001775,Cla022499,Cla004837,Cla004901,Cla020517,Cla000194,Cla005958,Cla003471,Cla005606,Cla008376,Cla004874,Cla012353,Cla021593,Cla005807,Cla006249,Cla019395,Cla015537,Novel00643,Cla020337,Cla008781,Cla00697…
GO:0043603	cellular amide metabolic process	biological_process	0.0062145	0.14895	117	2218	656	15506	Cla005343,Cla015802,Cla012353,Cla005606,Novel00652,Cla020266,Cla015452,Cla006976,Cla005247,Cla017099,Cla005395,Cla019068,Cla021113,Cla003456,Cla014273,Cla016761,Cla023264,Cla018917,Cla019797,Cla004702,Cla007020,Cla004950,Cla000194,Novel00485,Cla004837,Cla010547,Cla014176,Cla018955,Cla017600,Cla005637,Cla005690,Cla020930,Cla007673,Cla007069,Cla001766,Cla002793,Cla011721,Cla000829,Cla020737,Cla0051…
GO:0009507	chloroplast	cellular_component	0.0062947	0.14926	7	2218	17	15506	Cla000667,Cla007370,Novel00273,Cla014815,Cla008113,Novel01111,Cla022278
GO:0009536	plastid	cellular_component	0.0062947	0.14926	7	2218	17	15506	Cla022278,Novel00273,Cla014815,Cla008113,Cla007370,Novel01111,Cla000667
GO:0005622	intracellular	cellular_component	0.0067443	0.15908	519	2218	3288	15506	Cla013328,Cla007265,Cla013147,Novel00204,Cla001487,Cla002332,Cla021609,Cla018895,Cla014100,Cla000805,Cla000829,Cla022051,Cla020761,Cla017291,Cla016761,Cla001677,Cla009181,Cla021209,Cla005395,Cla015884,Cla017681,Cla003429,Cla005343,Cla017692,Cla006031,Cla008829,Cla007619,Cla015001,Cla009478,Cla008089,Cla013813,Cla022241,Cla014028,Cla009145,Cla005076,Cla015165,Cla017615,Cla008834,Cla014746,Cla01727…
GO:0008375	acetylglucosaminyltransferase activity	molecular_function	0.0068461	0.16063	14	2218	48	15506	Cla014428,Cla010423,Cla004297,Cla011828,Cla015604,Cla023383,Cla000921,Cla018849,Cla006940,Novel00689,Cla012631,Novel00903,Cla015692,Cla008975
GO:0015399	primary active transmembrane transporter activity	molecular_function	0.007069	0.1635	21	2218	95	15506	Novel00121,Cla008577,Cla021378,Cla004220,Cla005387,Cla021357,Cla003774,Cla014452,Cla013433,Cla017266,Cla007820,Cla017215,Cla009816,Cla019380,Cla005619,Cla015497,Cla021131,Cla002353,Cla018245,Cla015238,Cla015527
GO:0015405	P-P-bond-hydrolysis-driven transmembrane transporter activity	molecular_function	0.007069	0.1635	21	2218	95	15506	Cla017266,Cla009816,Cla017215,Cla007820,Cla003774,Cla021357,Cla014452,Cla013433,Cla021378,Cla005387,Cla004220,Novel00121,Cla008577,Cla015238,Cla015527,Cla018245,Cla021131,Cla002353,Cla005619,Cla019380,Cla015497
GO:0005739	mitochondrion	cellular_component	0.0070784	0.1635	58	2218	291	15506	Cla003005,Cla005994,Cla021891,Cla017692,Cla019971,Novel01098,Cla011084,Cla015466,Cla008514,Cla005012,Novel00643,Cla000667,Cla008887,Cla010292,Cla021413,Cla019834,Cla020053,Novel00586,Cla016936,Novel00868,Cla013730,Cla009906,Novel01307,Cla022686,Cla015497,Cla022868,Cla021734,Novel00688,Cla023068,Novel00933,Cla020955,Cla018895,Cla017927,Cla018556,Cla000813,Cla004074,Cla015431,Cla009207,Cla013678,No…
GO:0016053	organic acid biosynthetic process	biological_process	0.007329	0.16755	46	2218	223	15506	Cla006530,Cla017273,Cla008809,Cla004999,Cla021251,Novel01117,Cla021364,Cla004245,Cla014751,Cla016673,Cla004284,Cla011561,Cla017148,Cla016577,Cla004167,Cla013454,Cla021970,Cla005852,Cla014068,Cla016386,Cla009763,Cla009410,Cla016328,Cla016672,Cla019110,Cla017988,Cla009782,Cla002430,Novel00792,Cla017149,Cla015908,Cla003989,Cla005344,Cla006895,Cla015968,Cla016264,Cla020408,Cla018129,Cla017158,Cla0105…
GO:0046394	carboxylic acid biosynthetic process	biological_process	0.007329	0.16755	46	2218	223	15506	Novel01117,Cla004999,Cla021251,Cla006530,Cla008809,Cla017273,Cla014068,Cla016386,Cla021970,Cla005852,Cla017148,Cla016577,Cla004167,Cla013454,Cla016673,Cla014751,Cla004284,Cla011561,Cla021364,Cla004245,Cla003989,Cla015908,Cla017149,Novel00792,Cla017988,Cla009782,Cla002430,Cla016672,Cla019110,Cla009410,Cla009763,Cla016328,Novel00268,Cla004597,Cla002903,Cla002202,Cla018253,Cla013776,Cla010547,Cla017…
GO:0044712	single-organism catabolic process	biological_process	0.0074249	0.16888	39	2218	182	15506	Cla014418,Cla005491,Cla004216,Cla008191,Cla011125,Cla018433,Cla003339,Cla017722,Cla003122,Novel01119,Cla017877,Cla004847,Cla008834,Cla022442,Cla017396,Cla016667,Cla022882,Cla013617,Cla003262,Cla010253,Cla019376,Cla019014,Cla018361,Cla018367,Cla013455,Cla022499,Novel01082,Cla003665,Cla018362,Cla011578,Cla005589,Cla003902,Cla022170,Cla022306,Cla021934,Cla013639,Cla010255,Cla016041,Cla012154
GO:0016820	hydrolase activity, acting on acid anhydrides, catalyzing transmembrane movement of substances	molecular_function	0.0075871	0.17124	25	2218	119	15506	Cla009557,Cla005619,Cla019380,Cla015497,Cla021131,Cla002353,Cla015238,Cla015527,Cla008577,Novel00121,Cla005387,Cla021378,Cla004220,Cla021357,Cla005130,Cla013992,Cla003774,Cla014452,Cla013433,Cla017266,Cla007820,Cla017215,Cla018195,Novel01272,Cla009816
GO:0004743	pyruvate kinase activity	molecular_function	0.0076054	0.17124	5	2218	10	15506	Cla004216,Cla022882,Cla003122,Cla018362,Cla018361
GO:0004332	fructose-bisphosphate aldolase activity	molecular_function	0.0080921	0.18064	4	2218	7	15506	Cla017722,Cla003902,Cla003339,Novel01119
GO:0048878	chemical homeostasis	biological_process	0.0081039	0.18064	10	2218	30	15506	Novel00411,Cla018660,Cla014150,Cla021209,Cla017037,Cla014389,Cla007239,Cla011936,Cla022024,Cla008341
GO:0030529	ribonucleoprotein complex	cellular_component	0.0082468	0.18252	88	2218	468	15506	Cla016436,Cla007370,Cla008676,Cla010333,Cla005436,Cla003572,Cla005686,Cla004983,Cla009557,Cla004031,Cla013782,Cla021845,Cla019971,Cla013971,Novel01098,Cla016086,Cla007616,Cla017849,Novel00335,Cla012674,Cla017996,Cla003600,Cla018755,Cla009062,Cla007369,Cla019529,Cla021734,Cla017279,Cla010411,Cla020784,Cla013241,Cla007019,Cla019026,Cla014211,Cla014885,Cla005950,Cla004936,Cla012958,Cla004291,Cla0043…
GO:0008239	dipeptidyl-peptidase activity	molecular_function	0.0082705	0.18252	5	2218	10	15506	Cla009630,Cla010405,Cla019919,Cla019571,Cla022235
GO:0000975	regulatory region DNA binding	molecular_function	0.0084208	0.18402	3	2218	4	15506	Cla014766,Cla016644,Novel01239
GO:0001067	regulatory region nucleic acid binding	molecular_function	0.0084208	0.18402	3	2218	4	15506	Novel01239,Cla016644,Cla014766
GO:0015078	hydrogen ion transmembrane transporter activity	molecular_function	0.0089051	0.19285	48	2218	238	15506	Cla020164,Cla007613,Cla002271,Cla001181,Cla020816,Novel00471,Cla003644,Cla014389,Cla014100,Cla003774,Cla015019,Cla005925,Cla011267,Novel00965,Cla019529,Novel01194,Cla022333,Cla012694,Cla012949,Cla001746,Cla009108,Cla003275,Cla016840,Novel01304,Cla021378,Cla009088,Cla019834,Cla022440,Cla003005,Cla005926,Cla008029,Cla017266,Cla014344,Cla019971,Cla000525,Cla014452,Cla022292,Novel01098,Cla021131,Cla0…
GO:0098799	outer mitochondrial membrane protein complex	cellular_component	0.0089113	0.19285	10	2218	32	15506	Cla010292,Cla022686,Cla010745,Cla004074,Cla011011,Cla009207,Cla008887,Cla003667,Cla018895,Novel00688
GO:0006570	tyrosine metabolic process	biological_process	0.0090699	0.19533	4	2218	7	15506	Cla004999,Novel00268,Cla016673,Cla016672
GO:0031090	organelle membrane	cellular_component	0.0091494	0.1961	75	2218	404	15506	Cla008887,Cla000667,Cla006988,Novel00173,Cla019971,Cla003005,Novel01098,Cla011920,Cla012569,Cla015497,Cla020053,Cla022724,Cla013570,Cla008837,Cla009207,Cla018406,Cla004074,Cla011936,Novel00471,Cla001181,Cla016554,Cla021734,Cla001251,Cla007350,Cla008692,Cla005076,Cla006136,Cla015603,Cla007619,Cla011011,Cla008070,Cla008829,Cla011555,Cla010745,Cla006870,Cla000731,Cla018210,Cla003667,Cla005247,Novel0…
GO:0008610	lipid biosynthetic process	biological_process	0.0091984	0.1962	64	2218	332	15506	Cla014068,Cla009165,Cla006331,Cla004684,Cla004167,Cla006743,Cla015909,Cla004566,Novel00212,Cla015552,Cla015797,Cla021318,Cla008975,Cla014460,Cla020432,Cla023475,Cla015968,Cla020476,Cla004553,Cla017158,Cla016167,Cla006940,Cla010898,Cla007587,Cla015908,Cla000539,Cla019110,Cla022380,Cla014654,Cla009348,Cla009347,Cla021364,Cla011810,Cla011561,Cla005033,Cla005852,Cla016566,Cla011595,Cla005283,Cla00812…
GO:0009987	cellular process	biological_process	0.0092574	0.19652	1176	2218	7933	15506	Cla013509,Cla005012,Cla008887,Cla018548,Novel00448,Cla007616,Cla004220,Cla011870,Cla015211,Cla011016,Cla014165,Cla007272,Cla014262,Novel01098,Cla019185,Cla017390,Cla014239,Cla021416,Cla005436,Cla014475,Cla010171,Cla000850,Cla010562,Cla013485,Cla005412,Cla007613,Cla014885,Cla014211,Cla013877,Cla008614,Cla015270,Cla020094,Cla006447,Cla013862,Cla012827,Cla005375,Cla019611,Cla017851,Cla018438,Cla0187…
GO:0043604	amide biosynthetic process	biological_process	0.0095406	0.20157	111	2218	627	15506	Cla009062,Cla018755,Cla019529,Cla010791,Cla023103,Cla021037,Cla003600,Cla004284,Cla010694,Cla006616,Cla021970,Cla008113,Cla004936,Cla005950,Cla019026,Cla014885,Cla014211,Cla004317,Cla017814,Cla004291,Cla017279,Cla021991,Cla021734,Cla020784,Cla007019,Cla013241,Cla010411,Cla003572,Cla005686,Cla008584,Cla005436,Cla010333,Cla018049,Cla004031,Cla004685,Cla004983,Cla007679,Cla006584,Cla015666,Cla016086…
GO:0015672	monovalent inorganic cation transport	biological_process	0.0097179	0.20435	64	2218	338	15506	Novel00571,Cla015497,Cla021131,Cla023166,Novel00841,Cla018245,Cla015028,Cla008545,Cla015238,Cla019527,Cla009088,Cla021378,Novel01304,Cla016840,Novel01098,Cla022292,Cla017266,Cla003005,Cla016672,Cla019971,Cla015027,Cla010691,Cla014344,Cla013971,Cla002648,Novel01071,Cla019529,Cla015485,Cla016566,Cla016673,Cla012949,Cla002271,Novel00471,Cla020164,Cla007613,Cla019297,Cla005671,Cla019380,Cla021250,Cla…
GO:0004127	cytidylate kinase activity	molecular_function	0.0099844	0.20897	9	2218	28	15506	Cla009580,Cla008577,Cla003535,Cla007820,Cla004874,Cla007102,Cla008501,Cla006261,Cla004278
GO:0006164	purine nucleotide biosynthetic process	biological_process	0.010065	0.20968	26	2218	112	15506	Cla020164,Cla021378,Cla016840,Cla020816,Novel00471,Cla019814,Cla019834,Cla003644,Cla003005,Cla017266,Cla019971,Cla008058,Cla008501,Cla003774,Cla014452,Novel01098,Cla023338,Cla021131,Cla011996,Novel00965,Cla011267,Cla015497,Cla019380,Cla022333,Cla015238,Cla007102
GO:0098798	mitochondrial protein complex	cellular_component	0.010135	0.21015	22	2218	93	15506	Cla018895,Cla020955,Novel01098,Novel00688,Cla003005,Cla017692,Cla019971,Cla020816,Cla010292,Cla001181,Cla019834,Novel00471,Cla004074,Cla008887,Cla009207,Cla003667,Novel00965,Cla010745,Cla022686,Cla011555,Cla015497,Cla011011
GO:0004659	prenyltransferase activity	molecular_function	0.010399	0.21463	9	2218	27	15506	Cla022722,Cla012881,Cla005549,Cla004278,Cla007969,Novel00388,Cla003535,Cla021209,Cla021355
GO:0051537	2 iron, 2 sulfur cluster binding	molecular_function	0.01071	0.22003	9	2218	27	15506	Cla001947,Cla001857,Cla005926,Cla001775,Cla019591,Cla005925,Novel00891,Cla021830,Cla011099
GO:0009124	nucleoside monophosphate biosynthetic process	biological_process	0.010784	0.22053	22	2218	91	15506	Cla003005,Cla017266,Cla019971,Cla003774,Cla014452,Novel01098,Cla020164,Cla021378,Cla016840,Cla020816,Novel00471,Cla003644,Cla019834,Cla015238,Cla016577,Cla021131,Cla011996,Cla011267,Novel00965,Cla015497,Cla019380,Cla022333
GO:0044425	membrane part	cellular_component	0.010866	0.22119	339	2218	2143	15506	Cla008829,Cla010745,Cla019529,Cla001104,Cla001146,Cla008089,Cla010580,Cla003275,Cla000199,Cla020164,Cla004451,Cla002271,Novel00121,Cla016137,Cla005204,Cla021734,Cla007641,Cla005076,Cla011409,Cla008692,Cla011373,Cla017615,Cla021405,Cla019417,Cla008680,Cla021355,Cla006932,Cla022844,Cla012454,Cla007398,Cla018552,Cla002946,Cla015233,Novel00173,Cla009088,Cla020867,Cla009816,Cla012881,Cla021147,Cla0128…
GO:0006007	glucose catabolic process	biological_process	0.011099	0.22388	3	2218	4	15506	Cla012154,Cla013639,Cla008834
GO:0019320	hexose catabolic process	biological_process	0.011099	0.22388	3	2218	4	15506	Cla012154,Cla008834,Cla013639
GO:0009262	deoxyribonucleotide metabolic process	biological_process	0.011297	0.2259	4	2218	7	15506	Cla016577,Cla011125,Cla022500,Novel01082
GO:0016209	antioxidant activity	molecular_function	0.011313	0.2259	35	2218	161	15506	Cla008291,Cla021357,Cla007427,Cla023026,Cla023447,Cla010691,Cla010856,Cla004094,Cla013509,Cla022460,Cla016436,Cla021039,Cla022051,Cla014745,Cla017646,Cla011902,Cla020798,Cla011409,Cla011456,Cla001793,Cla009381,Cla018097,Cla013254,Cla015036,Cla003610,Cla005031,Cla012354,Cla011786,Cla003609,Cla019374,Cla015833,Cla013924,Cla015124,Cla002178,Cla005157
GO:0046434	organophosphate catabolic process	biological_process	0.011393	0.2259	10	2218	31	15506	Cla016673,Cla007303,Cla016672,Cla003262,Cla004639,Cla011125,Cla001251,Cla004999,Cla012602,Cla005671
GO:0016868	intramolecular transferase activity, phosphotransferases	molecular_function	0.011402	0.2259	7	2218	19	15506	Cla003938,Cla012154,Cla002361,Cla013639,Cla008834,Cla013768,Cla002359
GO:0030119	AP-type membrane coat adaptor complex	cellular_component	0.011463	0.22611	5	2218	12	15506	Cla012569,Cla022999,Cla019611,Cla004183,Cla008680
GO:0003854	3-beta-hydroxy-delta5-steroid dehydrogenase activity	molecular_function	0.011637	0.22655	22	2218	90	15506	Cla004553,Cla016566,Cla006331,Cla004684,Cla006895,Cla015968,Cla016243,Cla009297,Cla023475,Cla009165,Cla014068,Cla018764,Cla002430,Cla022380,Cla021873,Cla019110,Cla009763,Cla015552,Cla015908,Cla015909,Cla007587,Cla008122
GO:0016229	steroid dehydrogenase activity	molecular_function	0.011637	0.22655	22	2218	90	15506	Cla018764,Cla014068,Cla009165,Cla023475,Cla009297,Cla016243,Cla015968,Cla006895,Cla004684,Cla006331,Cla016566,Cla004553,Cla008122,Cla007587,Cla015909,Cla015908,Cla015552,Cla009763,Cla019110,Cla021873,Cla002430,Cla022380
GO:0033764	steroid dehydrogenase activity, acting on the CH-OH group of donors, NAD or NADP as acceptor	molecular_function	0.011637	0.22655	22	2218	90	15506	Cla006895,Cla015968,Cla006331,Cla004684,Cla004553,Cla016566,Cla018764,Cla014068,Cla009165,Cla016243,Cla023475,Cla009297,Cla009763,Cla019110,Cla021873,Cla002430,Cla022380,Cla008122,Cla015909,Cla007587,Cla015908,Cla015552
GO:0042623	ATPase activity, coupled	molecular_function	0.012023	0.23304	27	2218	134	15506	Cla009816,Cla007820,Cla017215,Cla012104,Cla017266,Cla013433,Cla014452,Cla003774,Cla021357,Cla020799,Cla004220,Cla021378,Cla005387,Cla009889,Novel00121,Cla008577,Cla015527,Cla009612,Cla016531,Cla015238,Cla002353,Cla021131,Cla005619,Cla019380,Cla015497,Cla002350,Cla012105
GO:0006518	peptide metabolic process	biological_process	0.012079	0.23311	107	2218	607	15506	Cla010694,Cla023103,Cla021037,Cla003600,Cla006616,Cla008113,Cla018755,Cla009062,Cla010791,Cla019529,Cla021734,Cla017279,Cla021991,Cla010411,Cla020784,Cla007019,Cla013241,Cla005950,Cla004936,Cla019026,Cla014211,Cla014885,Cla004317,Cla004291,Cla017814,Cla007679,Cla006584,Cla010333,Cla005436,Cla003572,Cla005686,Cla008584,Cla004031,Cla004983,Cla004685,Cla018049,Cla021845,Cla013782,Cla013971,Novel0109…
GO:0052646	alditol phosphate metabolic process	biological_process	0.012228	0.23497	9	2218	27	15506	Cla005671,Cla020432,Cla012602,Cla004999,Cla001251,Cla004639,Cla016673,Cla007303,Cla016672
GO:0006754	ATP biosynthetic process	biological_process	0.012452	0.23814	20	2218	81	15506	Cla022333,Cla019380,Cla015497,Novel00965,Cla011267,Cla021131,Cla015238,Cla003644,Cla019834,Novel00471,Cla020816,Cla020164,Cla021378,Cla016840,Novel01098,Cla014452,Cla003774,Cla019971,Cla017266,Cla003005
GO:0045333	cellular respiration	biological_process	0.012526	0.23814	19	2218	79	15506	Cla017692,Cla020955,Cla012753,Cla018556,Cla004332,Cla005456,Cla015431,Novel00922,Cla000142,Cla002312,Cla006797,Cla008389,Cla015641,Cla014391,Cla007123,Cla006136,Cla009906,Cla011555,Novel01307
GO:0098588	bounding membrane of organelle	cellular_component	0.012553	0.23814	60	2218	319	15506	Cla018195,Novel00688,Cla021734,Cla008692,Cla018895,Cla005076,Cla018940,Cla007350,Cla013992,Cla001251,Cla009207,Cla008837,Cla004074,Cla018406,Cla011936,Cla007737,Cla016554,Cla009215,Cla013527,Cla006870,Cla000731,Cla018210,Cla018469,Cla003667,Cla022977,Cla015603,Cla007212,Cla011011,Cla007619,Novel00411,Cla008829,Cla008070,Cla018939,Cla009165,Cla010745,Cla013328,Cla021891,Cla010295,Cla006926,Cla0119…
GO:0015293	symporter activity	molecular_function	0.012745	0.23974	5	2218	11	15506	Cla006870,Cla000731,Cla015484,Cla019527,Cla007212
GO:0015294	solute:cation symporter activity	molecular_function	0.012745	0.23974	5	2218	11	15506	Cla015484,Cla019527,Cla007212,Cla006870,Cla000731
GO:0004984	olfactory receptor activity	molecular_function	0.013116	0.24343	2	2218	2	15506	Cla015498,Cla006317
GO:0005549	odorant binding	molecular_function	0.013116	0.24343	2	2218	2	15506	Cla015498,Cla006317
GO:0007608	sensory perception of smell	biological_process	0.013116	0.24343	2	2218	2	15506	Cla015498,Cla006317
GO:0043043	peptide biosynthetic process	biological_process	0.01316	0.24343	104	2218	590	15506	Cla017246,Cla023167,Cla013147,Cla016438,Cla015108,Cla016904,Cla017411,Cla012232,Cla023235,Cla010217,Cla007788,Cla019188,Cla016577,Cla021742,Cla004063,Cla020469,Cla008555,Cla022077,Cla013050,Cla011721,Cla002793,Cla000829,Cla005137,Cla020737,Cla007020,Cla004950,Novel00485,Cla004837,Cla007673,Cla020930,Cla007069,Cla001766,Cla018955,Cla017600,Cla005690,Cla005637,Cla016761,Cla018917,Cla023264,Cla01979…
GO:0006412	translation	biological_process	0.01327	0.24445	102	2218	577	15506	Cla017411,Cla012232,Cla023235,Cla010217,Cla016577,Cla019188,Cla007788,Cla017246,Cla023167,Cla015108,Cla016438,Cla013147,Cla016904,Cla002793,Cla011721,Cla000829,Cla005137,Cla020737,Cla021742,Cla004063,Cla020469,Cla008555,Cla022077,Cla013050,Cla016761,Cla018917,Cla023264,Cla019797,Cla004702,Cla004950,Cla007020,Novel00485,Cla004837,Cla020930,Cla007673,Cla001766,Cla007069,Cla018955,Cla017600,Cla00569…
GO:0033554	cellular response to stress	biological_process	0.01407	0.25559	66	2218	366	15506	Cla008703,Cla016736,Cla002350,Cla007709,Cla014239,Novel01082,Cla007972,Cla014303,Cla019376,Cla007398,Cla007462,Cla006509,Cla018198,Cla017036,Cla006188,Cla012753,Cla022984,Cla018501,Cla018314,Cla002747,Cla017851,Cla009035,Cla018210,Cla004278,Cla014316,Cla013337,Cla002913,Cla015315,Cla004257,Cla014172,Cla018885,Cla019611,Cla019498,Cla017661,Cla011578,Cla017808,Cla001775,Cla008438,Cla004626,Cla01136…
GO:0044283	small molecule biosynthetic process	biological_process	0.014127	0.25559	54	2218	279	15506	Cla017158,Cla020408,Cla021407,Cla018129,Cla005344,Cla006895,Cla022008,Cla016264,Cla015968,Novel00268,Cla004597,Cla002903,Cla018253,Cla002202,Cla013776,Cla014239,Cla010547,Cla009782,Cla017988,Cla002430,Cla016672,Cla019110,Cla009763,Cla009410,Cla016328,Cla003989,Cla015908,Cla017149,Novel00792,Cla005852,Cla021970,Cla016577,Cla017148,Cla004167,Cla013454,Cla016673,Cla014751,Cla004284,Cla011561,Cla0148…
GO:0016226	iron-sulfur cluster assembly	biological_process	0.014139	0.25559	6	2218	15	15506	Cla013699,Cla000771,Cla019388,Cla015160,Cla016167,Cla022806
GO:0031163	metallo-sulfur cluster assembly	biological_process	0.014139	0.25559	6	2218	15	15506	Cla015160,Cla016167,Cla019388,Cla022806,Cla013699,Cla000771
GO:0030170	pyridoxal phosphate binding	molecular_function	0.014262	0.25559	19	2218	79	15506	Cla012553,Cla014492,Cla013473,Cla002414,Cla008439,Cla002249,Cla015337,Cla009899,Cla018896,Cla014064,Cla021934,Cla004567,Cla023154,Cla001514,Cla011522,Cla016981,Cla015410,Cla022350,Cla023008
GO:0015969	guanosine tetraphosphate metabolic process	biological_process	0.014354	0.25559	3	2218	5	15506	Cla017390,Cla004819,Cla012575
GO:0034035	purine ribonucleoside bisphosphate metabolic process	biological_process	0.014354	0.25559	3	2218	5	15506	Cla012575,Cla017390,Cla004819
GO:0006508	proteolysis	biological_process	0.014475	0.25559	101	2218	580	15506	Cla018314,Cla016001,Cla016594,Cla012201,Cla019571,Cla013158,Cla016661,Cla014625,Cla016960,Cla014316,Cla011138,Cla004795,Cla018433,Cla005407,Cla019026,Cla007643,Cla016667,Cla010405,Novel01117,Cla011178,Cla006489,Cla022241,Cla013617,Cla017661,Cla006582,Cla008692,Cla020799,Cla021416,Cla004522,Cla019264,Cla007398,Novel00586,Cla004612,Cla020697,Cla021717,Cla006584,Cla018172,Cla008838,Cla015822,Cla0089…
GO:0006281	DNA repair	biological_process	0.01451	0.25559	59	2218	325	15506	Cla018198,Cla006509,Cla007462,Cla005201,Cla017036,Cla006188,Cla020787,Cla005583,Cla012753,Cla008501,Cla004874,Cla022984,Cla003146,Cla018501,Cla016736,Cla008703,Cla017808,Cla007709,Cla008438,Cla002350,Cla014239,Cla004626,Cla014303,Cla007972,Cla000547,Cla011367,Cla000615,Cla007398,Cla020743,Cla004257,Cla015315,Cla017222,Cla014172,Cla017037,Cla013457,Cla012813,Cla015323,Cla003084,Cla019611,Cla018885…
GO:0009451	RNA modification	biological_process	0.014615	0.25559	35	2218	173	15506	Cla014216,Cla012284,Cla020276,Cla002376,Cla004278,Cla009035,Cla018314,Cla002747,Cla020915,Cla004905,Cla022230,Cla003084,Cla010098,Cla012928,Cla007409,Cla014389,Cla004257,Cla023201,Cla013749,Cla011228,Cla019299,Cla011367,Cla014303,Cla004901,Cla017808,Cla008438,Cla016736,Cla013695,Cla004874,Cla010071,Cla008501,Cla005583,Cla022928,Cla020337,Cla005201
GO:0009127	purine nucleoside monophosphate biosynthetic process	biological_process	0.014749	0.25559	21	2218	88	15506	Cla015238,Cla011996,Cla011267,Novel00965,Cla019380,Cla015497,Cla022333,Cla021131,Cla003774,Cla014452,Novel01098,Cla003005,Cla017266,Cla019971,Cla020816,Novel00471,Cla003644,Cla019834,Cla021378,Cla020164,Cla016840
GO:0009168	purine ribonucleoside monophosphate biosynthetic process	biological_process	0.014749	0.25559	21	2218	88	15506	Cla011267,Novel00965,Cla011996,Cla022333,Cla019380,Cla015497,Cla021131,Cla015238,Cla020816,Cla003644,Cla019834,Novel00471,Cla016840,Cla021378,Cla020164,Cla003774,Novel01098,Cla014452,Cla017266,Cla003005,Cla019971
GO:0006873	cellular ion homeostasis	biological_process	0.015021	0.25559	9	2218	28	15506	Cla014150,Cla018660,Novel00411,Cla007239,Cla014389,Cla021209,Cla017037,Cla008341,Cla022024
GO:0006875	cellular metal ion homeostasis	biological_process	0.015021	0.25559	9	2218	28	15506	Cla022024,Cla008341,Novel00411,Cla018660,Cla014150,Cla017037,Cla021209,Cla014389,Cla007239
GO:0030003	cellular cation homeostasis	biological_process	0.015021	0.25559	9	2218	28	15506	Novel00411,Cla018660,Cla014150,Cla021209,Cla017037,Cla014389,Cla007239,Cla022024,Cla008341
GO:0050801	ion homeostasis	biological_process	0.015021	0.25559	9	2218	28	15506	Cla022024,Cla008341,Cla014150,Novel00411,Cla018660,Cla014389,Cla007239,Cla017037,Cla021209
GO:0055065	metal ion homeostasis	biological_process	0.015021	0.25559	9	2218	28	15506	Cla008341,Cla022024,Cla007239,Cla014389,Cla017037,Cla021209,Cla014150,Cla018660,Novel00411
GO:0055080	cation homeostasis	biological_process	0.015021	0.25559	9	2218	28	15506	Cla022024,Cla008341,Cla021209,Cla017037,Cla014389,Cla007239,Novel00411,Cla018660,Cla014150
GO:0055082	cellular chemical homeostasis	biological_process	0.015021	0.25559	9	2218	28	15506	Novel00411,Cla018660,Cla014150,Cla017037,Cla021209,Cla014389,Cla007239,Cla022024,Cla008341
GO:0098771	inorganic ion homeostasis	biological_process	0.015021	0.25559	9	2218	28	15506	Cla014389,Cla007239,Cla017037,Cla021209,Cla014150,Novel00411,Cla018660,Cla022024,Cla008341
GO:0006665	sphingolipid metabolic process	biological_process	0.015174	0.25574	4	2218	8	15506	Cla003928,Cla012454,Cla014409,Cla000194
GO:0016875	ligase activity, forming carbon-oxygen bonds	molecular_function	0.015202	0.25574	18	2218	79	15506	Cla020469,Cla021742,Cla006791,Cla015666,Cla005137,Cla021991,Cla020930,Cla005637,Cla004685,Cla007788,Novel01170,Cla019188,Cla008113,Cla006584,Cla023103,Cla010694,Cla015725,Cla016761
GO:0016876	ligase activity, forming aminoacyl-tRNA and related compounds	molecular_function	0.015202	0.25574	18	2218	79	15506	Cla023103,Cla016761,Cla015725,Cla010694,Cla019188,Novel01170,Cla007788,Cla006584,Cla008113,Cla005637,Cla020930,Cla004685,Cla021991,Cla005137,Cla020469,Cla015666,Cla006791,Cla021742
GO:0015980	energy derivation by oxidation of organic compounds	biological_process	0.015314	0.25665	20	2218	86	15506	Cla005456,Cla015431,Cla004332,Cla018556,Cla000142,Cla002312,Novel00922,Cla017692,Cla020955,Cla012753,Cla009906,Cla006136,Cla007123,Cla014391,Novel01307,Cla011555,Cla005589,Cla006797,Cla015641,Cla008389
GO:0006006	glucose metabolic process	biological_process	0.015415	0.25738	7	2218	20	15506	Cla022170,Cla022499,Cla013639,Cla000612,Cla008834,Cla012154,Cla023084
GO:0004812	aminoacyl-tRNA ligase activity	molecular_function	0.015571	0.25902	17	2218	74	15506	Cla005137,Cla021991,Cla021742,Cla006791,Cla015666,Cla020469,Cla006584,Cla008113,Novel01170,Cla007788,Cla019188,Cla010694,Cla016761,Cla023103,Cla004685,Cla020930,Cla005637
GO:0005742	mitochondrial outer membrane translocase complex	cellular_component	0.016148	0.2663	9	2218	30	15506	Novel00688,Cla018895,Cla003667,Cla011011,Cla008887,Cla009207,Cla004074,Cla010292,Cla022686
GO:0006721	terpenoid metabolic process	biological_process	0.016188	0.2663	18	2218	76	15506	Cla005033,Cla006743,Cla023248,Cla020476,Cla011810,Cla009348,Cla009347,Cla005133,Cla019109,Cla014654,Cla001251,Cla021318,Cla013777,Cla015621,Cla002818,Cla005283,Cla016840,Cla010898
GO:0016114	terpenoid biosynthetic process	biological_process	0.016188	0.2663	18	2218	76	15506	Cla010898,Cla016840,Cla005283,Cla015621,Cla002818,Cla013777,Cla021318,Cla014654,Cla001251,Cla019109,Cla005133,Cla009347,Cla009348,Cla020476,Cla023248,Cla011810,Cla006743,Cla005033
GO:0003857	3-hydroxyacyl-CoA dehydrogenase activity	molecular_function	0.016532	0.27007	13	2218	48	15506	Cla009256,Cla016672,Cla016673,Cla007303,Cla016773,Cla021430,Cla001251,Cla009294,Cla012602,Cla010547,Cla015621,Cla007434,Cla016243
GO:0009156	ribonucleoside monophosphate biosynthetic process	biological_process	0.016539	0.27007	21	2218	89	15506	Cla019380,Cla015497,Cla022333,Cla011996,Cla011267,Novel00965,Cla021131,Cla015238,Novel00471,Cla003644,Cla019834,Cla020816,Cla016840,Cla021378,Cla020164,Cla014452,Novel01098,Cla003774,Cla019971,Cla003005,Cla017266
GO:0016787	hydrolase activity	molecular_function	0.01689	0.2742	431	2218	2816	15506	Cla006489,Cla010405,Cla006761,Cla019199,Cla005407,Cla003132,Cla013617,Cla022878,Cla014899,Cla005122,Cla017661,Cla017272,Cla012104,Novel01186,Cla010722,Cla022337,Cla003623,Cla005157,Cla016404,Cla018835,Cla018666,Cla002913,Cla016465,Cla004245,Cla017500,Cla014422,Cla021341,Cla010413,Cla008838,Cla021378,Cla018172,Cla000667,Cla006509,Cla018198,Cla016041,Cla007837,Cla010434,Cla017266,Cla019862,Cla01696…
GO:0003871	5-methyltetrahydropteroyltriglutamate-homocysteine S-methyltransferase activity	molecular_function	0.016976	0.2742	3	2218	5	15506	Cla017149,Cla002903,Cla017148
GO:0042085	5-methyltetrahydropteroyltri-L-glutamate-dependent methyltransferase activity	molecular_function	0.016976	0.2742	3	2218	5	15506	Cla017149,Cla017148,Cla002903
GO:0034470	ncRNA processing	biological_process	0.017178	0.27646	59	2218	320	15506	Cla010071,Cla008501,Cla021430,Cla017988,Cla019109,Cla005583,Cla003471,Cla005050,Cla013695,Cla004874,Cla016840,Cla005201,Cla020337,Cla011367,Cla023248,Cla011228,Cla017808,Cla008438,Cla005671,Cla016736,Cla016615,Cla014303,Cla007969,Cla001502,Cla004901,Cla003084,Cla001251,Cla010098,Cla015465,Cla017273,Cla009256,Cla022230,Cla003535,Cla004257,Cla014389,Cla023201,Cla004317,Cla002818,Cla005283,Cla012928…
GO:1902600	hydrogen ion transmembrane transport	biological_process	0.017296	0.27736	35	2218	169	15506	Cla015238,Cla019797,Cla021131,Cla023166,Cla019297,Cla019380,Cla015497,Cla017266,Cla003005,Cla019971,Novel01098,Cla022292,Cla014452,Cla016840,Novel01304,Cla021378,Cla009088,Cla019834,Cla022440,Cla015019,Novel00965,Cla011267,Cla022333,Cla019529,Cla018195,Cla003774,Cla014100,Cla013992,Cla020164,Cla007613,Cla020816,Cla002271,Cla003644,Cla014389,Novel00471
GO:0008661	1-deoxy-D-xylulose-5-phosphate synthase activity	molecular_function	0.01768	0.28149	5	2218	12	15506	Cla021318,Cla009347,Cla006743,Cla009348,Cla013777
GO:0016744	transferase activity, transferring aldehyde or ketonic groups	molecular_function	0.01768	0.28149	5	2218	12	15506	Cla009347,Cla006743,Cla013777,Cla009348,Cla021318
GO:0000976	transcription regulatory region sequence-specific DNA binding	molecular_function	0.017852	0.28222	2	2218	2	15506	Novel01239,Cla014766
GO:0044212	transcription regulatory region DNA binding	molecular_function	0.017852	0.28222	2	2218	2	15506	Novel01239,Cla014766
GO:0016903	oxidoreductase activity, acting on the aldehyde or oxo group of donors	molecular_function	0.018698	0.29257	16	2218	65	15506	Cla015968,Cla016566,Cla006743,Cla013454,Cla019193,Cla002202,Cla014068,Cla002598,Cla023464,Cla009347,Cla021318,Cla007303,Cla019110,Cla006530,Cla013777,Cla015908
GO:0006818	hydrogen transport	biological_process	0.018745	0.29257	38	2218	188	15506	Cla019797,Cla018245,Cla015238,Cla019297,Cla015497,Cla019380,Cla021131,Cla023166,Novel01098,Cla014452,Cla022292,Cla017266,Cla003005,Cla019971,Cla014344,Cla009088,Cla022440,Cla019834,Novel01304,Cla016840,Cla021378,Novel00965,Cla011267,Cla022333,Cla019529,Cla015485,Cla015019,Cla003774,Cla014100,Cla013992,Cla018195,Cla020816,Cla002271,Cla014389,Cla003644,Novel00471,Cla020164,Cla007613
GO:0015992	proton transport	biological_process	0.018745	0.29257	38	2218	188	15506	Cla022440,Cla019834,Cla009088,Novel01304,Cla021378,Cla016840,Cla014452,Cla022292,Novel01098,Cla014344,Cla019971,Cla003005,Cla017266,Cla019380,Cla015497,Cla019297,Cla023166,Cla021131,Cla018245,Cla019797,Cla015238,Novel00471,Cla014389,Cla003644,Cla002271,Cla020816,Cla007613,Cla020164,Cla014100,Cla013992,Cla003774,Cla018195,Cla019529,Cla022333,Novel00965,Cla011267,Cla015485,Cla015019
GO:0044424	intracellular part	cellular_component	0.018791	0.29257	497	2218	3190	15506	Cla014815,Cla010413,Cla008113,Cla022076,Cla003667,Cla021078,Cla010961,Cla018666,Cla021795,Cla006870,Cla003600,Cla014433,Cla013856,Cla016465,Cla009062,Cla008070,Cla011011,Cla007019,Cla010722,Cla009281,Cla017661,Novel00933,Cla006966,Cla006524,Cla021991,Cla003999,Cla018561,Novel00471,Cla011936,Cla004317,Cla006349,Cla000813,Cla019199,Cla013678,Cla006761,Cla008837,Cla016667,Cla005950,Cla004936,Cla0149…
GO:0016866	intramolecular transferase activity	molecular_function	0.018858	0.29257	13	2218	49	15506	Cla019299,Cla008834,Cla013749,Cla003938,Cla007409,Cla005589,Cla012154,Cla002361,Cla022928,Cla018547,Cla013639,Cla013768,Cla002359
GO:0033926	glycopeptide alpha-N-acetylgalactosaminidase activity	molecular_function	0.018901	0.29257	3	2218	5	15506	Cla019983,Cla016404,Cla020499
GO:0022904	respiratory electron transport chain	biological_process	0.019274	0.29672	9	2218	29	15506	Cla011555,Cla006136,Cla009906,Cla005456,Cla018556,Cla007123,Cla014391,Cla020955,Cla017692
GO:0044431	Golgi apparatus part	cellular_component	0.019302	0.29672	16	2218	67	15506	Cla014746,Cla005761,Cla011920,Cla007350,Cla017615,Cla018406,Cla016554,Cla015692,Cla000731,Cla006870,Cla016465,Cla006271,Cla013570,Cla023465,Cla007212,Cla012569
GO:0016667	oxidoreductase activity, acting on a sulfur group of donors	molecular_function	0.01938	0.29689	23	2218	99	15506	Cla023167,Cla022408,Cla012950,Cla014328,Cla010417,Novel00317,Cla023299,Cla005344,Cla022460,Cla002517,Cla003456,Cla011786,Cla007427,Cla010698,Cla022682,Cla021415,Cla009094,Cla017688,Cla019247,Cla014272,Cla006447,Cla009615,Novel00177
GO:0016655	oxidoreductase activity, acting on NAD(P)H, quinone or similar compound as acceptor	molecular_function	0.019631	0.29971	12	2218	45	15506	Cla016936,Cla011409,Novel00908,Cla005994,Cla002352,Cla013971,Novel00868,Cla018556,Cla008430,Cla020433,Cla009906,Cla005456
GO:0005242	inward rectifier potassium channel activity	molecular_function	0.019705	0.29981	3	2218	5	15506	Cla020293,Novel01071,Cla009747
GO:0008378	galactosyltransferase activity	molecular_function	0.019953	0.30255	8	2218	25	15506	Cla007689,Cla004918,Cla022078,Cla008325,Cla023338,Cla022337,Cla012748,Cla007664
GO:0031589	cell-substrate adhesion	biological_process	0.020287	0.30657	2	2218	2	15506	Cla018153,Cla009901
GO:0019538	protein metabolic process	biological_process	0.020609	0.31039	386	2218	2532	15506	Cla007837,Cla003005,Cla007714,Cla021845,Cla013971,Cla016961,Cla006736,Cla013695,Novel00266,Cla008838,Cla020558,Cla006791,Cla018172,Cla008301,Cla015822,Cla016842,Cla019606,Cla008387,Cla019316,Cla018049,Cla006966,Cla017661,Cla021991,Cla007019,Cla022337,Cla007229,Cla006489,Cla010405,Cla013268,Cla005950,Cla016667,Cla004936,Cla005407,Cla003999,Cla013617,Cla011966,Cla004317,Cla011936,Cla008861,Cla00394…
GO:0044455	mitochondrial membrane part	cellular_component	0.021173	0.31623	22	2218	99	15506	Cla018895,Cla020955,Novel01098,Novel00688,Cla003005,Cla017692,Cla019971,Cla020816,Cla010292,Cla001181,Cla019834,Novel00471,Cla004074,Cla009207,Cla008887,Cla003667,Cla022686,Novel00965,Cla010745,Cla011555,Cla015497,Cla011011
GO:0009142	nucleoside triphosphate biosynthetic process	biological_process	0.021394	0.31623	20	2218	85	15506	Cla016840,Cla021378,Cla020164,Cla020816,Cla003644,Cla019834,Novel00471,Cla017266,Cla003005,Cla019971,Cla003774,Novel01098,Cla014452,Cla021131,Novel00965,Cla011267,Cla022333,Cla015497,Cla019380,Cla015238
GO:0009145	purine nucleoside triphosphate biosynthetic process	biological_process	0.021394	0.31623	20	2218	85	15506	Cla003774,Novel01098,Cla014452,Cla017266,Cla003005,Cla019971,Cla020816,Cla003644,Cla019834,Novel00471,Cla016840,Cla021378,Cla020164,Cla015238,Cla011267,Novel00965,Cla022333,Cla015497,Cla019380,Cla021131
GO:0009201	ribonucleoside triphosphate biosynthetic process	biological_process	0.021394	0.31623	20	2218	85	15506	Cla003774,Cla014452,Novel01098,Cla003005,Cla017266,Cla019971,Cla020816,Novel00471,Cla019834,Cla003644,Cla020164,Cla021378,Cla016840,Cla015238,Cla011267,Novel00965,Cla019380,Cla015497,Cla022333,Cla021131
GO:0009206	purine ribonucleoside triphosphate biosynthetic process	biological_process	0.021394	0.31623	20	2218	85	15506	Cla015238,Cla021131,Cla011267,Novel00965,Cla022333,Cla019380,Cla015497,Cla017266,Cla003005,Cla019971,Cla003774,Novel01098,Cla014452,Cla021378,Cla020164,Cla016840,Cla020816,Cla003644,Cla019834,Novel00471
GO:0043038	amino acid activation	biological_process	0.021595	0.31623	17	2218	76	15506	Cla010694,Cla015725,Cla016761,Cla023103,Cla008113,Cla006584,Cla007788,Cla019188,Cla004685,Cla020930,Cla005637,Cla021991,Cla005137,Cla006791,Cla021742,Cla015666,Cla020469
GO:0043039	tRNA aminoacylation	biological_process	0.021595	0.31623	17	2218	76	15506	Cla006584,Cla008113,Cla019188,Cla007788,Cla016761,Cla010694,Cla015725,Cla023103,Cla004685,Cla005637,Cla020930,Cla005137,Cla021991,Cla015666,Cla006791,Cla021742,Cla020469
GO:0004000	adenosine deaminase activity	molecular_function	0.021623	0.31623	2	2218	2	15506	Cla005853,Cla001216
GO:0090407	organophosphate biosynthetic process	biological_process	0.021742	0.31623	45	2218	232	15506	Cla008501,Cla017988,Cla014452,Novel01098,Cla003005,Cla017266,Cla019971,Cla015963,Cla000539,Cla005471,Cla019834,Cla016167,Cla021378,Cla006940,Cla016840,Cla008781,Cla021407,Cla015238,Cla011094,Cla002350,Cla020432,Cla015497,Cla019380,Cla014460,Cla008975,Cla021131,Cla023338,Cla003774,Cla021734,Cla008058,Cla020816,Novel00471,Cla003644,Cla019814,Cla020164,Cla011595,Cla015001,Cla016577,Cla021256,Cla0071…
GO:0072522	purine-containing compound biosynthetic process	biological_process	0.021767	0.31623	26	2218	119	15506	Cla020816,Cla019834,Cla003644,Cla019814,Novel00471,Cla016840,Cla021378,Cla020164,Cla003774,Cla008501,Novel01098,Cla014452,Cla017266,Cla003005,Cla019971,Cla008058,Novel00965,Cla011267,Cla011996,Cla022333,Cla019380,Cla015497,Cla023338,Cla021131,Cla015238,Cla007102
GO:0008194	UDP-glycosyltransferase activity	molecular_function	0.021779	0.31623	26	2218	129	15506	Cla017384,Cla023286,Cla012748,Cla004473,Cla015604,Cla003320,Cla021407,Cla000921,Cla018849,Cla012631,Novel00689,Cla012972,Cla012973,Cla008975,Cla021734,Cla014428,Cla010423,Cla004297,Cla011828,Cla008465,Cla023383,Cla011131,Cla006940,Cla017383,Cla015692,Novel00903
GO:0009152	purine ribonucleotide biosynthetic process	biological_process	0.021848	0.31623	24	2218	108	15506	Cla019380,Cla015497,Cla022333,Cla011996,Cla011267,Novel00965,Cla021131,Cla007102,Cla015238,Novel00471,Cla019834,Cla019814,Cla003644,Cla020816,Cla021378,Cla020164,Cla016840,Cla014452,Novel01098,Cla008501,Cla003774,Cla019971,Cla003005,Cla017266
GO:0016836	hydro-lyase activity	molecular_function	0.022053	0.31732	18	2218	76	15506	Cla007333,Cla018367,Cla014760,Cla023234,Cla019014,Cla016861,Cla011810,Cla008191,Cla012137,Cla009745,Cla010898,Cla011998,Cla009294,Cla008809,Cla009410,Cla016773,Cla021348,Cla010879
GO:0042451	purine nucleoside biosynthetic process	biological_process	0.022167	0.31732	23	2218	102	15506	Cla011267,Novel00965,Cla015497,Cla019380,Cla022333,Cla021131,Cla015238,Cla007102,Cla020816,Novel00471,Cla019834,Cla019814,Cla003644,Cla021378,Cla016840,Cla020164,Cla008501,Cla003774,Cla014452,Novel01098,Cla003005,Cla017266,Cla019971
GO:0046129	purine ribonucleoside biosynthetic process	biological_process	0.022167	0.31732	23	2218	102	15506	Cla007102,Cla015238,Cla015497,Cla019380,Cla022333,Novel00965,Cla011267,Cla021131,Cla014452,Novel01098,Cla008501,Cla003774,Cla019971,Cla003005,Cla017266,Novel00471,Cla003644,Cla019834,Cla019814,Cla020816,Cla021378,Cla016840,Cla020164
GO:0008963	phospho-N-acetylmuramoyl-pentapeptide-transferase activity	molecular_function	0.02226	0.31732	2	2218	2	15506	Cla005020,Cla019607
GO:0006418	tRNA aminoacylation for protein translation	biological_process	0.02228	0.31732	16	2218	71	15506	Cla005137,Cla021991,Cla021742,Cla006791,Cla015666,Cla020469,Cla006584,Cla008113,Cla019188,Cla007788,Cla010694,Cla016761,Cla023103,Cla004685,Cla020930,Cla005637
GO:0008238	exopeptidase activity	molecular_function	0.022724	0.32067	20	2218	88	15506	Cla017396,Cla020010,Cla001925,Cla016961,Cla013617,Cla022235,Cla007407,Cla006489,Cla010405,Cla019981,Cla012758,Cla019919,Cla016960,Cla019264,Cla020208,Cla006847,Cla003943,Cla019571,Cla004950,Cla009630
GO:0006072	glycerol-3-phosphate metabolic process	biological_process	0.022784	0.32067	8	2218	25	15506	Cla012602,Cla005671,Cla004639,Cla016672,Cla016673,Cla007303,Cla004999,Cla001251
GO:0046168	glycerol-3-phosphate catabolic process	biological_process	0.022784	0.32067	8	2218	25	15506	Cla016672,Cla016673,Cla007303,Cla004639,Cla001251,Cla004999,Cla012602,Cla005671
GO:0004017	adenylate kinase activity	molecular_function	0.02305	0.32067	4	2218	8	15506	Cla004881,Cla001468,Cla004490,Cla019316
GO:0009165	nucleotide biosynthetic process	biological_process	0.023148	0.32067	30	2218	143	15506	Cla022333,Cla019380,Cla015497,Novel00965,Cla011267,Cla011996,Cla009301,Cla021131,Cla023338,Cla016577,Cla007102,Cla015238,Cla003644,Cla019834,Cla019814,Cla005471,Novel00471,Cla020816,Cla008781,Cla021378,Cla020164,Cla016840,Novel01098,Cla014452,Cla003774,Cla008501,Cla019971,Cla008058,Cla017266,Cla003005
GO:1901293	nucleoside phosphate biosynthetic process	biological_process	0.023148	0.32067	30	2218	143	15506	Cla009301,Cla021131,Cla023338,Cla019380,Cla015497,Cla022333,Cla011996,Cla011267,Novel00965,Cla007102,Cla015238,Cla016577,Cla008781,Cla021378,Cla016840,Cla020164,Novel00471,Cla005471,Cla019834,Cla003644,Cla019814,Cla020816,Cla019971,Cla008058,Cla003005,Cla017266,Cla014452,Novel01098,Cla008501,Cla003774
GO:0030145	manganese ion binding	molecular_function	0.023148	0.32067	7	2218	21	15506	Cla019981,Cla022723,Cla013639,Cla008834,Cla017396,Cla010377,Cla012154
GO:0070176	DRM complex	cellular_component	0.023422	0.32067	2	2218	2	15506	Cla000786,Cla023189
GO:0090568	nuclear transcriptional repressor complex	cellular_component	0.023422	0.32067	2	2218	2	15506	Cla023189,Cla000786
GO:0090571	RNA polymerase II transcription repressor complex	cellular_component	0.023422	0.32067	2	2218	2	15506	Cla023189,Cla000786
GO:0007033	vacuole organization	biological_process	0.02347	0.32067	4	2218	8	15506	Novel01082,Cla011578,Cla011936,Cla019376
GO:0051381	histamine binding	molecular_function	0.023522	0.32067	2	2218	2	15506	Cla003926,Cla018938
GO:0070026	nitric oxide binding	molecular_function	0.023522	0.32067	2	2218	2	15506	Cla003926,Cla018938
GO:0070405	ammonium ion binding	molecular_function	0.023522	0.32067	2	2218	2	15506	Cla018938,Cla003926
GO:1901360	organic cyclic compound metabolic process	biological_process	0.023952	0.32486	520	2218	3384	15506	Cla021375,Cla004029,Cla002631,Cla009256,Cla009632,Cla022442,Cla005985,Cla017734,Novel00411,Cla019341,Cla012547,Cla002033,Cla014216,Cla004216,Cla006594,Cla015908,Cla019068,Cla019293,Cla014275,Cla020208,Cla005974,Cla016971,Cla020078,Cla011487,Cla011177,Cla011367,Cla019797,Cla012928,Cla008122,Cla021247,Cla018240,Cla007092,Cla012749,Cla004999,Cla004264,Cla010280,Cla007950,Cla020915,Cla014418,Cla00549…
GO:0009260	ribonucleotide biosynthetic process	biological_process	0.024047	0.32486	24	2218	109	15506	Cla020816,Cla003644,Cla019834,Cla019814,Novel00471,Cla021378,Cla016840,Cla020164,Cla003774,Cla008501,Novel01098,Cla014452,Cla017266,Cla003005,Cla019971,Novel00965,Cla011267,Cla011996,Cla022333,Cla019380,Cla015497,Cla021131,Cla015238,Cla007102
GO:0046390	ribose phosphate biosynthetic process	biological_process	0.024047	0.32486	24	2218	109	15506	Novel00471,Cla003644,Cla019834,Cla019814,Cla020816,Cla021378,Cla016840,Cla020164,Cla014452,Novel01098,Cla008501,Cla003774,Cla019971,Cla003005,Cla017266,Cla015497,Cla019380,Cla022333,Cla011996,Cla011267,Novel00965,Cla021131,Cla007102,Cla015238
GO:0044267	cellular protein metabolic process	biological_process	0.024651	0.33201	310	2218	2025	15506	Cla011799,Cla000555,Cla005202,Cla017220,Cla002946,Cla012674,Cla020553,Cla018574,Cla017996,Novel00335,Cla017849,Cla022722,Cla022906,Cla019492,Cla004612,Cla007679,Cla006584,Cla000921,Cla010333,Cla008385,Cla006932,Cla007709,Cla002350,Cla017279,Cla005204,Cla021734,Cla005076,Cla008692,Cla010411,Cla013415,Cla006032,Cla021071,Cla022241,Cla021514,Cla010694,Cla014129,Cla015001,Novel01222,Cla006616,Cla0212…
GO:0016832	aldehyde-lyase activity	molecular_function	0.025012	0.33585	5	2218	13	15506	Cla017722,Cla000429,Cla003902,Cla003339,Novel01119
GO:0008324	cation transmembrane transporter activity	molecular_function	0.02535	0.33937	96	2218	558	15506	Cla002271,Cla001181,Novel00471,Cla012513,Cla020164,Cla007613,Cla016137,Cla002648,Cla019529,Novel01071,Cla005925,Cla001746,Cla003275,Cla000731,Cla006870,Cla012694,Cla012949,Cla020867,Cla009088,Cla015211,Cla021378,Novel01304,Cla016840,Cla014150,Cla015490,Cla000525,Cla012810,Cla022292,Cla021367,Novel01098,Cla003005,Cla008029,Cla017266,Cla005926,Cla010691,Cla014344,Cla019971,Cla008897,Novel00571,Cla0…
GO:0034641	cellular nitrogen compound metabolic process	biological_process	0.025441	0.33957	577	2218	3773	15506	Cla009062,Novel00580,Cla008294,Cla021037,Cla003600,Cla000813,Cla004936,Cla007409,Novel00471,Cla012104,Cla021991,Cla008809,Cla010875,Cla013766,Cla009557,Cla015498,Cla010754,Cla016436,Cla006484,Cla021378,Cla006188,Cla007462,Cla010434,Cla003005,Cla007837,Cla021845,Cla017266,Cla013971,Cla019971,Cla009259,Cla013695,Cla005450,Cla008210,Cla021016,Cla016438,Cla012284,Cla021647,Cla014185,Cla016577,Cla0080…
GO:0032553	ribonucleotide binding	molecular_function	0.025836	0.3437	306	2218	2074	15506	Cla005202,Cla017220,Cla012810,Cla009816,Cla022984,Cla020553,Cla002946,Cla011429,Cla006584,Cla007398,Cla022844,Cla019492,Cla006319,Cla023084,Cla007709,Cla002350,Cla020551,Cla013455,Cla016385,Cla005133,Cla015165,Cla019645,Cla014071,Cla018885,Cla016137,Cla005204,Cla019814,Novel00121,Cla015315,Cla006032,Cla004160,Cla021514,Cla021071,Cla018570,Cla013712,Cla013415,Cla003959,Cla007102,Cla014129,Cla01069…
GO:0015077	monovalent inorganic cation transmembrane transporter activity	molecular_function	0.025904	0.3437	60	2218	331	15506	Cla020816,Cla001181,Cla002271,Cla003644,Cla014389,Novel00471,Cla020164,Cla007613,Cla003774,Cla014100,Novel00404,Cla019444,Novel00965,Cla011267,Cla002648,Cla022333,Cla019529,Novel01194,Novel01071,Cla015019,Cla005925,Cla001746,Cla009108,Cla003275,Cla009747,Cla012949,Cla012694,Cla009088,Cla022440,Cla019834,Novel01304,Cla021378,Cla016840,Cla000525,Novel01098,Cla022292,Cla014452,Cla020293,Cla017266,Cl…
GO:0008237	metallopeptidase activity	molecular_function	0.026175	0.34626	20	2218	93	15506	Cla004072,Cla006454,Cla020858,Cla006582,Cla011434,Cla013457,Cla012813,Cla017396,Novel01240,Cla009548,Cla013660,Cla018198,Cla003070,Cla007398,Cla002417,Cla002415,Cla021717,Cla018200,Cla004905,Cla008438
GO:0005198	structural molecule activity	molecular_function	0.02664	0.35064	100	2218	570	15506	Cla004950,Cla007020,Cla015617,Novel00485,Cla004837,Cla017600,Cla017290,Cla007673,Cla007069,Cla001766,Cla023264,Cla018917,Cla008341,Cla004702,Cla006976,Cla017099,Cla019068,Cla005395,Cla021113,Cla014273,Cla003456,Cla005343,Novel00652,Cla005606,Cla015452,Cla022468,Novel00891,Cla010790,Cla003293,Cla017246,Cla012547,Cla023167,Cla015108,Cla022333,Cla016438,Cla012434,Cla023235,Cla005058,Cla017411,Cla012…
GO:0006974	cellular response to DNA damage stimulus	biological_process	0.026664	0.35064	60	2218	341	15506	Cla007398,Cla011367,Cla000547,Cla000615,Cla014239,Cla004626,Cla014303,Cla007972,Cla016736,Cla008703,Cla007709,Cla017808,Cla002350,Cla008438,Cla004874,Cla022984,Cla018501,Cla003146,Cla020787,Cla005583,Cla012753,Cla008501,Cla005201,Cla017036,Cla006188,Cla018198,Cla006509,Cla007462,Cla019954,Cla014216,Cla009612,Cla002913,Cla013337,Cla014316,Cla012284,Cla009035,Cla022879,Cla006812,Cla004278,Cla002747…
GO:0044429	mitochondrial part	cellular_component	0.027397	0.35855	40	2218	203	15506	Novel00688,Cla021734,Cla023068,Cla017927,Cla020955,Cla018895,Cla009207,Cla013678,Cla018556,Cla004074,Novel00471,Cla001181,Cla020816,Cla009215,Cla012694,Cla003667,Cla006136,Cla011011,Cla007619,Novel01194,Cla011555,Cla010745,Novel00965,Cla021891,Cla019971,Cla017692,Cla003005,Novel01098,Cla000667,Novel00643,Cla008887,Cla015466,Cla021413,Cla019834,Cla010292,Cla020053,Cla009906,Cla013730,Cla015497,Cla…
GO:0006672	ceramide metabolic process	biological_process	0.027426	0.35855	3	2218	5	15506	Cla000194,Cla003928,Cla014409
GO:0010181	FMN binding	molecular_function	0.027821	0.36265	8	2218	26	15506	Cla008070,Cla012129,Cla022496,Cla021143,Cla015315,Cla012872,Cla018362,Cla000897
GO:0031072	heat shock protein binding	molecular_function	0.028137	0.36569	8	2218	26	15506	Cla021429,Cla004826,Cla020965,Cla012748,Novel00738,Cla004490,Cla003604,Cla018406
GO:0032991	macromolecular complex	cellular_component	0.028636	0.3711	296	2218	1865	15506	Cla007831,Cla022999,Cla013782,Cla022235,Cla007370,Cla003885,Cla013570,Cla020053,Novel00571,Cla004983,Cla004685,Cla004031,Cla015497,Cla001954,Cla014303,Cla023166,Cla012569,Cla018367,Cla005686,Cla020784,Cla005420,Cla023189,Cla005761,Cla012958,Cla016554,Cla001181,Cla004291,Cla018976,Cla004074,Cla019026,Cla004183,Cla013337,Cla004222,Cla005606,Novel00652,Cla004704,Cla015537,Cla004613,Cla023217,Cla0069…
GO:0016645	oxidoreductase activity, acting on the CH-NH group of donors	molecular_function	0.028794	0.37207	13	2218	52	15506	Cla016386,Cla000964,Cla004332,Cla014068,Cla004901,Cla010547,Cla003989,Cla004284,Cla010611,Cla009816,Cla010098,Cla021251,Cla016577
GO:0003008	system process	biological_process	0.029462	0.3796	5	2218	14	15506	Cla020286,Cla015498,Cla006317,Cla014248,Cla014068
GO:0015276	ligand-gated ion channel activity	molecular_function	0.029858	0.3825	13	2218	57	15506	Cla004473,Cla009747,Cla020293,Cla008341,Cla003303,Cla016926,Cla021209,Cla017037,Cla018794,Cla007674,Cla014389,Novel01071,Cla014150
GO:0022834	ligand-gated channel activity	molecular_function	0.029858	0.3825	13	2218	57	15506	Cla016926,Cla003303,Cla008341,Cla020293,Cla009747,Cla004473,Cla014150,Novel01071,Cla014389,Cla018794,Cla007674,Cla017037,Cla021209
GO:0019080	viral gene expression	biological_process	0.030114	0.38467	8	2218	28	15506	Cla003535,Cla002350,Cla010405,Cla009630,Cla019571,Cla018885,Cla021997,Cla019919
GO:0006694	steroid biosynthetic process	biological_process	0.030467	0.38807	22	2218	98	15506	Cla015552,Cla015908,Cla015909,Cla007587,Cla008122,Cla022380,Cla002430,Cla021873,Cla019110,Cla009763,Cla016243,Cla023475,Cla009297,Cla009165,Cla014068,Cla018764,Cla004553,Cla016566,Cla006331,Cla004684,Cla006895,Cla015968
GO:0000139	Golgi membrane	cellular_component	0.030891	0.39234	9	2218	33	15506	Cla006870,Cla000731,Cla013570,Cla007350,Cla011920,Cla012569,Cla007212,Cla018406,Cla016554
GO:0005794	Golgi apparatus	cellular_component	0.031619	0.40044	17	2218	76	15506	Cla018406,Cla015692,Cla016554,Cla005761,Cla014746,Cla017615,Cla007350,Cla011920,Cla020543,Cla012569,Cla007212,Cla023465,Cla016465,Cla000731,Cla006870,Cla013570,Cla006271
GO:0004497	monooxygenase activity	molecular_function	0.031841	0.40212	14	2218	58	15506	Cla011099,Cla006886,Cla011132,Cla016120,Cla006885,Cla005671,Cla020214,Cla002818,Cla004245,Cla017273,Cla001857,Cla017988,Cla009782,Cla001251
GO:0006313	transposition, DNA-mediated	biological_process	0.032161	0.40336	8	2218	29	15506	Novel00467,Cla016385,Cla012958,Novel00306,Cla017838,Cla003600,Cla008109,Novel00925
GO:0032196	transposition	biological_process	0.032161	0.40336	8	2218	29	15506	Cla016385,Novel00467,Novel00306,Cla012958,Cla008109,Cla017838,Cla003600,Novel00925
GO:0007129	synapsis	biological_process	0.032634	0.40336	4	2218	9	15506	Cla007656,Cla022431,Cla008555,Cla014433
GO:0007130	synaptonemal complex assembly	biological_process	0.032634	0.40336	4	2218	9	15506	Cla014433,Cla008555,Cla022431,Cla007656
GO:0045143	homologous chromosome segregation	biological_process	0.032634	0.40336	4	2218	9	15506	Cla008555,Cla007656,Cla022431,Cla014433
GO:0070192	chromosome organization involved in meiosis	biological_process	0.032634	0.40336	4	2218	9	15506	Cla008555,Cla022431,Cla007656,Cla014433
GO:0070193	synaptonemal complex organization	biological_process	0.032634	0.40336	4	2218	9	15506	Cla014433,Cla007656,Cla022431,Cla008555
GO:0044432	endoplasmic reticulum part	cellular_component	0.032663	0.40336	25	2218	121	15506	Cla018210,Cla018469,Cla022724,Cla013527,Cla001677,Cla009165,Cla010745,Cla013328,Cla022977,Cla011902,Cla015603,Novel00411,Cla008829,Cla005076,Cla001251,Cla010295,Cla007737,Novel00173,Cla021209,Cla000539,Novel00643,Cla005247,Cla008837,Cla016167,Cla018660
GO:0009318	exodeoxyribonuclease VII complex	cellular_component	0.033123	0.40791	3	2218	6	15506	Cla014185,Cla000199,Cla010434
GO:0030131	clathrin adaptor complex	cellular_component	0.033365	0.40975	3	2218	7	15506	Cla022999,Cla008680,Cla012569
GO:0008202	steroid metabolic process	biological_process	0.033953	0.41583	22	2218	99	15506	Cla002430,Cla022380,Cla021873,Cla019110,Cla009763,Cla015552,Cla015908,Cla015909,Cla007587,Cla008122,Cla004553,Cla016566,Cla006331,Cla004684,Cla015968,Cla006895,Cla016243,Cla009297,Cla023475,Cla009165,Cla014068,Cla018764
GO:0034220	ion transmembrane transport	biological_process	0.034139	0.41696	51	2218	280	15506	Cla020816,Cla002271,Cla014389,Cla003644,Novel00471,Cla020164,Cla005192,Cla003221,Cla007613,Cla003774,Cla014100,Novel00404,Cla013992,Cla018195,Cla011267,Novel00965,Cla007265,Cla002648,Cla022333,Cla019529,Cla012146,Cla015019,Cla009088,Cla000539,Cla015211,Cla022440,Cla019834,Cla016840,Novel01304,Cla021378,Cla002221,Novel01098,Cla022292,Cla014452,Cla017266,Cla003005,Cla019971,Novel00571,Cla019297,Cla…
GO:0043531	ADP binding	molecular_function	0.034839	0.42435	18	2218	92	15506	Cla012434,Cla014216,Cla002913,Cla019855,Cla009035,Cla011367,Cla004278,Cla001168,Cla018314,Cla017808,Cla008897,Cla022698,Cla004874,Cla001017,Cla008501,Cla021357,Cla020337,Cla004220
GO:0016651	oxidoreductase activity, acting on NAD(P)H	molecular_function	0.035096	0.42631	16	2218	72	15506	Cla016936,Cla016644,Novel00908,Cla014035,Cla014391,Novel00868,Cla009906,Cla006136,Cla005994,Cla002352,Cla013971,Cla011409,Cla020433,Cla008430,Cla018556,Cla005456
GO:0005798	Golgi-associated vesicle	cellular_component	0.0353	0.42648	5	2218	15	15506	Cla013570,Cla016554,Cla011920,Cla012569,Cla018406
GO:0030660	Golgi-associated vesicle membrane	cellular_component	0.0353	0.42648	5	2218	15	15506	Cla011920,Cla016554,Cla013570,Cla018406,Cla012569
GO:0044033	multi-organism metabolic process	biological_process	0.0361	0.43495	9	2218	34	15506	Cla019571,Cla000543,Cla010405,Cla009630,Cla002350,Cla003535,Cla019919,Cla021997,Cla018885
GO:1990542	mitochondrial transmembrane transport	biological_process	0.037074	0.44549	6	2218	19	15506	Cla022686,Cla018895,Cla003667,Cla011011,Cla008887,Cla004074
GO:0009163	nucleoside biosynthetic process	biological_process	0.037529	0.44734	23	2218	107	15506	Cla021131,Cla011267,Novel00965,Cla022333,Cla015497,Cla019380,Cla015238,Cla007102,Cla020164,Cla021378,Cla016840,Cla020816,Cla019834,Cla003644,Cla019814,Novel00471,Cla017266,Cla003005,Cla019971,Cla003774,Cla008501,Novel01098,Cla014452
GO:0042455	ribonucleoside biosynthetic process	biological_process	0.037529	0.44734	23	2218	107	15506	Cla021131,Novel00965,Cla011267,Cla015497,Cla019380,Cla022333,Cla015238,Cla007102,Cla021378,Cla020164,Cla016840,Cla020816,Novel00471,Cla019814,Cla019834,Cla003644,Cla003005,Cla017266,Cla019971,Cla008501,Cla003774,Cla014452,Novel01098
GO:1901659	glycosyl compound biosynthetic process	biological_process	0.037529	0.44734	23	2218	107	15506	Cla021131,Cla011267,Novel00965,Cla022333,Cla019380,Cla015497,Cla015238,Cla007102,Cla016840,Cla021378,Cla020164,Cla020816,Cla019834,Cla003644,Cla019814,Novel00471,Cla017266,Cla003005,Cla019971,Cla003774,Cla008501,Novel01098,Cla014452
GO:0017076	purine nucleotide binding	molecular_function	0.037768	0.44899	303	2218	2071	15506	Cla007709,Cla023084,Cla002350,Cla006319,Cla016385,Cla005133,Cla020551,Cla013455,Cla006584,Cla011429,Cla019492,Cla007398,Cla022844,Cla020553,Cla002946,Cla012810,Cla005202,Cla017220,Cla022984,Cla009816,Cla012212,Cla008391,Cla002747,Cla021225,Cla003959,Cla014129,Cla010694,Cla007102,Cla021514,Cla004160,Cla021071,Novel00121,Cla015315,Cla019814,Cla006032,Cla013415,Cla013712,Cla018570,Cla014071,Cla01888…
GO:0006629	lipid metabolic process	biological_process	0.037902	0.44938	106	2218	624	15506	Cla021873,Cla001251,Cla017877,Cla009015,Cla015127,Cla013862,Cla021734,Cla002818,Cla022004,Cla015621,Cla001148,Cla013617,Cla005283,Cla008122,Cla011178,Cla005033,Novel01338,Cla018460,Cla005852,Cla011595,Cla016566,Cla021364,Cla011561,Cla011810,Cla016673,Cla009348,Cla009347,Novel01098,Cla016826,Cla019109,Cla002430,Cla022306,Cla021430,Cla005570,Cla009763,Cla016672,Cla013777,Cla015963,Cla016840,Cla0214…
GO:0016829	lyase activity	molecular_function	0.038238	0.45086	56	2218	312	15506	Cla007333,Cla000429,Cla003339,Cla017722,Cla014088,Novel01119,Cla002648,Cla001514,Cla002033,Cla023154,Cla016861,Cla011810,Cla008191,Cla023234,Cla014760,Cla011595,Cla007779,Cla009745,Cla002312,Cla008809,Cla008439,Cla012553,Cla009294,Cla011998,Cla018367,Novel00841,Cla013776,Cla005133,Cla016981,Cla010754,Cla007656,Novel00571,Cla023084,Cla004597,Cla019014,Cla021407,Cla021902,Cla010898,Cla018896,Cla012…
GO:0006555	methionine metabolic process	biological_process	0.038508	0.45086	4	2218	10	15506	Cla002903,Cla017148,Cla017149,Cla010611
GO:0007008	outer mitochondrial membrane organization	biological_process	0.038533	0.45086	3	2218	6	15506	Cla022686,Cla004074,Cla008887
GO:0045040	protein import into mitochondrial outer membrane	biological_process	0.038533	0.45086	3	2218	6	15506	Cla022686,Cla008887,Cla004074
GO:0090151	establishment of protein localization to mitochondrial membrane	biological_process	0.038533	0.45086	3	2218	6	15506	Cla008887,Cla004074,Cla022686
GO:0008137	NADH dehydrogenase (ubiquinone) activity	molecular_function	0.039394	0.45832	8	2218	28	15506	Cla005994,Cla002352,Cla016936,Novel00908,Cla018556,Novel00868,Cla009906,Cla005456
GO:0050136	NADH dehydrogenase (quinone) activity	molecular_function	0.039394	0.45832	8	2218	28	15506	Cla016936,Novel00908,Cla005994,Cla002352,Novel00868,Cla018556,Cla005456,Cla009906
GO:0009539	photosystem II reaction center	cellular_component	0.039478	0.45832	6	2218	20	15506	Cla009281,Cla004905,Cla002582,Cla006317,Cla012447,Cla004819
GO:0004222	metalloendopeptidase activity	molecular_function	0.039703	0.45973	17	2218	79	15506	Cla013660,Cla003070,Cla018198,Cla009548,Cla012813,Cla013457,Novel01240,Cla004072,Cla006454,Cla006582,Cla004905,Cla008438,Cla018200,Cla021717,Cla007398,Cla002417,Cla002415
GO:0046912	transferase activity, transferring acyl groups, acyl groups converted into alkyl on transfer	molecular_function	0.040679	0.4659	4	2218	10	15506	Cla009244,Cla015282,Cla001148,Cla002601
GO:0030031	cell projection assembly	biological_process	0.04154	0.4659	7	2218	23	15506	Cla020276,Cla013650,Cla004345,Cla015809,Cla007689,Cla018240,Cla012513
GO:0006836	neurotransmitter transport	biological_process	0.041635	0.4659	2	2218	3	15506	Novel01240,Cla015484
GO:0001883	purine nucleoside binding	molecular_function	0.041863	0.4659	299	2218	2049	15506	Cla020786,Cla019498,Cla007820,Novel00273,Cla016450,Cla004257,Cla008577,Cla005031,Cla009354,Cla011114,Cla016921,Cla023103,Cla010079,Cla015485,Novel01111,Cla012753,Cla008291,Cla013433,Cla013657,Cla012519,Cla016863,Cla019885,Cla007592,Cla000465,Cla017036,Cla007846,Cla020916,Cla015898,Cla017751,Cla008298,Cla004685,Cla008703,Cla017463,Cla001404,Cla011726,Cla014303,Cla013986,Cla009580,Cla005549,Cla0080…
GO:0032549	ribonucleoside binding	molecular_function	0.041863	0.4659	299	2218	2049	15506	Cla012278,Cla005130,Cla014909,Cla020787,Cla022607,Cla013903,Cla011177,Cla013732,Cla020249,Cla002417,Cla011367,Cla001454,Cla019602,Cla001020,Cla021807,Cla008438,Cla013668,Cla023227,Cla017215,Cla019444,Cla011187,Cla002955,Cla012813,Cla020469,Cla003148,Cla016980,Cla017037,Cla021256,Cla014216,Cla015527,Cla012434,Cla004624,Cla018469,Cla018200,Cla012105,Cla005514,Cla005871,Cla021398,Cla022698,Cla006596…
GO:0032550	purine ribonucleoside binding	molecular_function	0.041863	0.4659	299	2218	2049	15506	Cla022844,Cla007398,Cla019492,Cla011429,Cla006584,Cla013455,Cla020551,Cla005133,Cla016385,Cla006319,Cla023084,Cla002350,Cla007709,Cla009816,Cla022984,Cla005202,Cla017220,Cla012810,Cla002946,Cla020553,Cla007102,Cla010694,Cla014129,Cla003959,Cla021225,Cla002747,Cla008391,Cla012212,Cla016137,Cla005204,Cla015165,Cla019645,Cla014071,Cla018885,Cla018570,Cla013712,Cla013415,Cla019814,Novel00121,Cla01531…
GO:0019239	deaminase activity	molecular_function	0.042412	0.4659	3	2218	6	15506	Cla001216,Cla014462,Cla005853
GO:0005905	coated pit	cellular_component	0.042809	0.4659	3	2218	6	15506	Cla018406,Cla011920,Cla013570
GO:0012510	trans-Golgi network transport vesicle membrane	cellular_component	0.042809	0.4659	3	2218	6	15506	Cla018406,Cla011920,Cla013570
GO:0030125	clathrin vesicle coat	cellular_component	0.042809	0.4659	3	2218	6	15506	Cla011920,Cla013570,Cla018406
GO:0030130	clathrin coat of trans-Golgi network vesicle	cellular_component	0.042809	0.4659	3	2218	6	15506	Cla018406,Cla013570,Cla011920
GO:0030132	clathrin coat of coated pit	cellular_component	0.042809	0.4659	3	2218	6	15506	Cla018406,Cla011920,Cla013570
GO:0030136	clathrin-coated vesicle	cellular_component	0.042809	0.4659	3	2218	6	15506	Cla011920,Cla013570,Cla018406
GO:0030140	trans-Golgi network transport vesicle	cellular_component	0.042809	0.4659	3	2218	6	15506	Cla018406,Cla011920,Cla013570
GO:0030665	clathrin-coated vesicle membrane	cellular_component	0.042809	0.4659	3	2218	6	15506	Cla018406,Cla011920,Cla013570
GO:0032555	purine ribonucleotide binding	molecular_function	0.042854	0.4659	299	2218	2050	15506	Cla009043,Cla021717,Cla001455,Cla016802,Cla000850,Cla008897,Cla016736,Cla014475,Cla014239,Cla019185,Cla006596,Cla022303,Cla021367,Cla005871,Cla005514,Cla021398,Cla022698,Cla019338,Cla011016,Cla011870,Cla005387,Cla013341,Cla004220,Cla015666,Cla017202,Cla019225,Cla005012,Cla016945,Cla004278,Cla006103,Cla009035,Cla017316,Cla018758,Cla005491,Cla018314,Cla003339,Cla010644,Cla005375,Cla007630,Cla004608…
GO:0097367	carbohydrate derivative binding	molecular_function	0.042944	0.4659	308	2218	2109	15506	Cla022607,Cla013903,Cla012278,Cla020787,Cla005130,Cla014909,Cla001020,Cla001454,Cla019602,Cla013668,Cla021807,Cla008438,Cla013732,Cla002417,Cla020249,Cla011177,Cla011367,Cla000897,Cla020469,Cla003148,Cla016980,Cla017037,Cla017215,Cla019444,Cla023227,Cla002955,Cla011187,Cla012813,Cla018200,Cla012105,Cla012434,Cla015527,Cla004624,Cla021256,Cla014216,Cla018469,Cla005012,Cla019225,Cla017202,Cla015666…
GO:0035639	purine ribonucleoside triphosphate binding	molecular_function	0.043074	0.4659	296	2218	2028	15506	Cla018200,Cla012105,Cla021256,Cla014216,Cla015527,Cla004624,Cla018469,Cla003148,Cla020469,Cla016980,Cla017037,Cla023227,Cla017215,Cla019444,Cla011187,Cla002955,Cla012813,Cla001454,Cla019602,Cla001020,Cla021807,Cla008438,Cla013668,Cla011177,Cla013732,Cla002417,Cla020249,Cla011367,Cla022607,Cla013903,Cla012278,Cla005130,Cla014909,Cla020787,Cla010644,Cla003339,Cla018314,Cla005491,Cla018758,Cla004278…
GO:0070085	glycosylation	biological_process	0.043148	0.4659	20	2218	94	15506	Cla004918,Cla022078,Cla007689,Cla008385,Cla000921,Cla023338,Cla008325,Cla015603,Cla008978,Cla020743,Novel00903,Cla022004,Cla020558,Cla016014,Cla005076,Cla022337,Cla005994,Cla007664,Cla008977,Cla010295
GO:0016055	Wnt signaling pathway	biological_process	0.043226	0.4659	7	2218	24	15506	Cla005899,Cla003947,Cla009676,Cla018210,Novel00908,Cla012743,Cla021690
GO:0008250	oligosaccharyltransferase complex	cellular_component	0.043465	0.4659	3	2218	6	15506	Cla005076,Cla008837,Cla015603
GO:0003880	protein C-terminal carboxyl O-methyltransferase activity	molecular_function	0.043492	0.4659	3	2218	6	15506	Cla006932,Cla018460,Cla008222
GO:0004671	protein C-terminal S-isoprenylcysteine carboxyl O-methyltransferase activity	molecular_function	0.043492	0.4659	3	2218	6	15506	Cla006932,Cla018460,Cla008222
GO:0006481	C-terminal protein methylation	biological_process	0.043492	0.4659	3	2218	6	15506	Cla018460,Cla006932,Cla008222
GO:0018410	C-terminal protein amino acid modification	biological_process	0.043492	0.4659	3	2218	6	15506	Cla008222,Cla006932,Cla018460
GO:0043687	post-translational protein modification	biological_process	0.043492	0.4659	3	2218	6	15506	Cla006932,Cla018460,Cla008222
GO:0001882	nucleoside binding	molecular_function	0.043531	0.4659	299	2218	2051	15506	Cla005412,Cla008614,Cla013877,Cla004608,Cla007630,Cla005375,Cla008332,Cla016117,Cla021997,Cla010644,Cla003339,Cla018314,Cla009035,Cla006103,Cla017316,Cla004278,Cla016945,Cla005491,Cla018758,Cla011870,Cla011016,Cla019338,Cla019225,Cla005012,Cla017202,Cla015666,Cla005387,Cla013341,Cla004220,Cla021367,Cla022303,Cla006596,Cla022698,Cla021398,Cla005871,Cla005514,Cla016736,Cla008897,Cla000850,Cla019185…
GO:0005778	peroxisomal membrane	cellular_component	0.043684	0.4659	5	2218	14	15506	Cla004848,Cla006926,Cla018940,Cla006271,Cla018939
GO:0005779	integral component of peroxisomal membrane	cellular_component	0.043684	0.4659	5	2218	14	15506	Cla004848,Cla018940,Cla006271,Cla006926,Cla018939
GO:0031231	intrinsic component of peroxisomal membrane	cellular_component	0.043684	0.4659	5	2218	14	15506	Cla004848,Cla018939,Cla018940,Cla006271,Cla006926
GO:0031903	microbody membrane	cellular_component	0.043684	0.4659	5	2218	14	15506	Cla006926,Cla018940,Cla006271,Cla018939,Cla004848
GO:0044438	microbody part	cellular_component	0.043684	0.4659	5	2218	14	15506	Cla004848,Cla018939,Cla018940,Cla006271,Cla006926
GO:0044439	peroxisomal part	cellular_component	0.043684	0.4659	5	2218	14	15506	Cla004848,Cla018939,Cla006271,Cla018940,Cla006926
GO:0016646	oxidoreductase activity, acting on the CH-NH group of donors, NAD or NADP as acceptor	molecular_function	0.043826	0.46615	8	2218	28	15506	Cla003989,Cla014068,Cla016386,Cla010547,Cla016577,Cla021251,Cla004284,Cla010611
GO:0009219	pyrimidine deoxyribonucleotide metabolic process	biological_process	0.044304	0.46615	3	2218	6	15506	Cla022500,Novel01082,Cla016577
GO:0009394	2'-deoxyribonucleotide metabolic process	biological_process	0.044304	0.46615	3	2218	6	15506	Cla022500,Novel01082,Cla016577
GO:0019692	deoxyribose phosphate metabolic process	biological_process	0.044304	0.46615	3	2218	6	15506	Cla016577,Cla022500,Novel01082
GO:0000015	phosphopyruvate hydratase complex	cellular_component	0.044473	0.46615	3	2218	6	15506	Cla018367,Cla008191,Cla019014
GO:0004634	phosphopyruvate hydratase activity	molecular_function	0.044473	0.46615	3	2218	6	15506	Cla019014,Cla008191,Cla018367
GO:0008685	2-C-methyl-D-erythritol 2,4-cyclodiphosphate synthase activity	molecular_function	0.04476	0.46615	2	2218	3	15506	Cla014654,Cla005133
GO:0000795	synaptonemal complex	cellular_component	0.044963	0.46615	3	2218	6	15506	Cla022431,Cla007656,Cla014433
GO:0007128	meiotic prophase I	biological_process	0.044963	0.46615	3	2218	6	15506	Cla022431,Cla007656,Cla014433
GO:0051324	prophase	biological_process	0.044963	0.46615	3	2218	6	15506	Cla014433,Cla007656,Cla022431
GO:0098762	meiotic cell cycle phase	biological_process	0.044963	0.46615	3	2218	6	15506	Cla007656,Cla022431,Cla014433
GO:0098764	meiosis I cell cycle phase	biological_process	0.044963	0.46615	3	2218	6	15506	Cla007656,Cla022431,Cla014433
GO:0006743	ubiquinone metabolic process	biological_process	0.045631	0.47089	3	2218	6	15506	Cla004584,Cla014854,Cla007239
GO:0006744	ubiquinone biosynthetic process	biological_process	0.045631	0.47089	3	2218	6	15506	Cla007239,Cla014854,Cla004584
GO:0005740	mitochondrial envelope	cellular_component	0.046608	0.47986	35	2218	181	15506	Cla003667,Cla009215,Cla012694,Novel01194,Cla011555,Cla010745,Novel00965,Cla006136,Cla007619,Cla011011,Cla020955,Cla018895,Cla021734,Novel00688,Novel00471,Cla001181,Cla020816,Cla009207,Cla018556,Cla004074,Cla020053,Cla015497,Cla022686,Cla009906,Cla013730,Novel01098,Cla021891,Cla017692,Cla019971,Cla003005,Cla019834,Cla010292,Cla000667,Cla008887,Cla015466
GO:0005351	sugar:proton symporter activity	molecular_function	0.047971	0.49049	3	2218	6	15506	Cla007212,Cla000731,Cla006870
GO:0005402	cation:sugar symporter activity	molecular_function	0.047971	0.49049	3	2218	6	15506	Cla006870,Cla000731,Cla007212
GO:0015295	solute:proton symporter activity	molecular_function	0.047971	0.49049	3	2218	6	15506	Cla000731,Cla006870,Cla007212
GO:0022890	inorganic cation transmembrane transporter activity	molecular_function	0.048267	0.49239	87	2218	515	15506	Cla007613,Cla020164,Novel00471,Cla002271,Cla001181,Cla016137,Cla005925,Cla019529,Novel01071,Cla002648,Cla012694,Cla012949,Cla003275,Cla001746,Cla014150,Novel01304,Cla021378,Cla016840,Cla015211,Cla020867,Cla009088,Cla010691,Cla014344,Cla019971,Cla003005,Cla008029,Cla017266,Cla005926,Cla021367,Cla022292,Novel01098,Cla000525,Cla012810,Novel00841,Cla023166,Cla021405,Cla021131,Cla022868,Cla015497,Cla0…
GO:0043087	regulation of GTPase activity	biological_process	0.048644	0.4951	2	2218	3	15506	Cla016001,Cla021916
GO:0015936	coenzyme A metabolic process	biological_process	0.049279	0.49926	5	2218	15	15506	Cla019814,Cla008501,Cla007102,Cla015723,Cla001204
GO:0006801	superoxide metabolic process	biological_process	0.049442	0.49926	4	2218	10	15506	Cla021357,Cla010691,Cla008698,Cla019840
GO:0072593	reactive oxygen species metabolic process	biological_process	0.049442	0.49926	4	2218	10	15506	Cla019840,Cla010691,Cla008698,Cla021357
GO:1901136	carbohydrate derivative catabolic process	biological_process	0.049717	0.49926	12	2218	49	15506	Cla011125,Cla001251,Cla004999,Cla016672,Cla016673,Cla014339,Cla007303,Cla003262,Cla004639,Cla005671,Cla015515,Cla012602
GO:0036442	hydrogen-exporting ATPase activity	molecular_function	0.049725	0.49926	4	2218	10	15506	Cla019380,Cla014452,Cla015497,Cla021378
GO:0046961	proton-transporting ATPase activity, rotational mechanism	molecular_function	0.049725	0.49926	4	2218	10	15506	Cla019380,Cla014452,Cla015497,Cla021378
GO:0000279	M phase	biological_process	0.050629	0.49989	6	2218	19	15506	Cla011058,Cla007656,Cla022431,Cla021046,Cla014433,Cla021734
GO:0022403	cell cycle phase	biological_process	0.050629	0.49989	6	2218	19	15506	Cla021734,Cla014433,Cla021046,Cla011058,Cla022431,Cla007656
GO:0044848	biological phase	biological_process	0.050629	0.49989	6	2218	19	15506	Cla014433,Cla021734,Cla011058,Cla007656,Cla022431,Cla021046
GO:0005770	late endosome	cellular_component	0.050647	0.49989	2	2218	3	15506	Cla008692,Cla011936
GO:0031902	late endosome membrane	cellular_component	0.050647	0.49989	2	2218	3	15506	Cla011936,Cla008692
GO:0045121	membrane raft	cellular_component	0.050647	0.49989	2	2218	3	15506	Cla011936,Cla008692
GO:0071986	Ragulator complex	cellular_component	0.050647	0.49989	2	2218	3	15506	Cla008692,Cla011936
GO:0006631	fatty acid metabolic process	biological_process	0.050684	0.49989	25	2218	124	15506	Cla009294,Cla021430,Cla001251,Cla016672,Cla007303,Cla013862,Cla016773,Cla009256,Cla015621,Cla010898,Cla005852,Cla017158,Cla018129,Cla020408,Cla004167,Cla016673,Cla011561,Cla011810,Cla021364,Cla004597,Cla016243,Cla003665,Cla007434,Cla012602,Cla010547
GO:0070008	serine-type exopeptidase activity	molecular_function	0.051087	0.50082	13	2218	56	15506	Cla016961,Cla019919,Cla016960,Cla019571,Cla006489,Cla004950,Cla003943,Cla009630,Cla010405,Cla022235,Cla020208,Cla007407,Cla013617
GO:0098660	inorganic ion transmembrane transport	biological_process	0.051115	0.50082	43	2218	236	15506	Novel01098,Cla022292,Cla014452,Cla017266,Cla003005,Cla019971,Cla009088,Cla015211,Cla022440,Cla019834,Novel01304,Cla021378,Cla016840,Cla019797,Cla010562,Cla015238,Cla011094,Cla019297,Novel00571,Cla019977,Cla019380,Cla015497,Cla021131,Cla023166,Novel00841,Cla003774,Novel00404,Cla014100,Cla013992,Cla018195,Cla020816,Cla002271,Cla003644,Cla014389,Novel00471,Cla020164,Cla007613,Novel00965,Cla011267,Cl…
GO:0098662	inorganic cation transmembrane transport	biological_process	0.051115	0.50082	43	2218	236	15506	Cla015019,Cla002648,Cla011267,Novel00965,Cla019529,Cla022333,Cla018195,Novel00404,Cla014100,Cla013992,Cla003774,Cla020164,Cla007613,Cla002271,Cla020816,Novel00471,Cla003644,Cla014389,Cla015238,Cla011094,Cla019797,Cla010562,Cla021131,Novel00841,Cla023166,Cla019977,Novel00571,Cla019297,Cla019380,Cla015497,Cla003005,Cla017266,Cla019971,Cla022292,Cla014452,Novel01098,Novel01304,Cla016840,Cla021378,Cl…
GO:0000045	autophagosome assembly	biological_process	0.052134	0.50464	3	2218	6	15506	Cla019376,Cla011578,Novel01082
GO:0016236	macroautophagy	biological_process	0.052134	0.50464	3	2218	6	15506	Novel01082,Cla019376,Cla011578
GO:0006874	cellular calcium ion homeostasis	biological_process	0.052199	0.50464	7	2218	24	15506	Cla008341,Cla014389,Cla017037,Cla021209,Cla014150,Cla018660,Novel00411
GO:0055074	calcium ion homeostasis	biological_process	0.052199	0.50464	7	2218	24	15506	Cla014150,Novel00411,Cla018660,Cla014389,Cla008341,Cla017037,Cla021209
GO:0072503	cellular divalent inorganic cation homeostasis	biological_process	0.052199	0.50464	7	2218	24	15506	Cla008341,Cla014389,Cla017037,Cla021209,Cla014150,Cla018660,Novel00411
GO:0072507	divalent inorganic cation homeostasis	biological_process	0.052199	0.50464	7	2218	24	15506	Cla017037,Cla021209,Cla014389,Cla008341,Novel00411,Cla018660,Cla014150
GO:0004803	transposase activity	molecular_function	0.052298	0.50464	6	2218	21	15506	Novel00467,Cla003600,Cla017838,Cla012958,Novel00925,Novel00306
GO:0016620	oxidoreductase activity, acting on the aldehyde or oxo group of donors, NAD or NADP as acceptor	molecular_function	0.052564	0.50611	12	2218	50	15506	Cla023464,Cla015908,Cla002202,Cla019193,Cla014068,Cla002598,Cla016566,Cla013454,Cla019110,Cla007303,Cla015968,Cla006530
GO:0004618	phosphoglycerate kinase activity	molecular_function	0.053521	0.51311	2	2218	3	15506	Cla005491,Cla013455
GO:0016774	phosphotransferase activity, carboxyl group as acceptor	molecular_function	0.053521	0.51311	2	2218	3	15506	Cla013455,Cla005491
GO:0004424	imidazoleglycerol-phosphate dehydratase activity	molecular_function	0.054522	0.52159	2	2218	3	15506	Cla008809,Cla009410
GO:0016830	carbon-carbon lyase activity	molecular_function	0.055616	0.53091	21	2218	104	15506	Cla016791,Cla002312,Cla000142,Cla008439,Cla003902,Cla007272,Cla017988,Cla017722,Cla000429,Cla003339,Novel00841,Novel01119,Novel00571,Cla023084,Cla002648,Cla004597,Cla010754,Cla007656,Cla001514,Cla011595,Cla021407
GO:0019318	hexose metabolic process	biological_process	0.056316	0.53645	12	2218	52	15506	Cla022170,Cla008834,Cla000798,Cla012154,Cla021208,Cla023084,Cla010079,Cla019106,Cla022499,Cla016115,Cla013639,Cla000612
GO:0022900	electron transport chain	biological_process	0.056595	0.53796	11	2218	45	15506	Cla020955,Cla017692,Cla022333,Cla011555,Cla006136,Cla009906,Cla005456,Cla018556,Cla014391,Cla007123,Cla014035
GO:0016765	transferase activity, transferring alkyl or aryl (other than methyl) groups	molecular_function	0.057169	0.54118	13	2218	57	15506	Cla004278,Cla009782,Cla005549,Cla012881,Cla005344,Cla022722,Cla017299,Cla021355,Cla003535,Cla021209,Novel00388,Cla012928,Cla007969
GO:0006725	cellular aromatic compound metabolic process	biological_process	0.057177	0.54118	497	2218	3281	15506	Cla016436,Cla019304,Cla013749,Cla006484,Cla014905,Cla009670,Cla019316,Cla010875,Cla013766,Cla009557,Cla007817,Cla015498,Cla013040,Cla007434,Cla010754,Cla016822,Cla007837,Cla010434,Cla003005,Cla005050,Cla017266,Cla019971,Cla013695,Cla003902,Cla022670,Cla005450,Cla006188,Cla021378,Cla006791,Cla015804,Cla007462,Cla006509,Cla018198,Cla016041,Cla021795,Cla002913,Cla018666,Cla021037,Cla014433,Cla003600…
GO:0019082	viral protein processing	biological_process	0.058208	0.54799	4	2218	11	15506	Cla019571,Cla019919,Cla009630,Cla010405
GO:0004576	oligosaccharyl transferase activity	molecular_function	0.05824	0.54799	3	2218	7	15506	Cla008385,Cla020558,Cla008837
GO:0012505	endomembrane system	cellular_component	0.058265	0.54799	59	2218	341	15506	Cla015124,Cla009165,Cla013328,Cla010745,Cla002648,Cla007212,Cla022977,Cla015603,Novel00411,Cla008829,Cla008070,Cla018210,Cla018469,Cla013527,Cla016465,Cla006870,Cla000731,Cla011936,Cla007737,Novel00273,Cla016554,Cla008837,Cla018406,Cla017615,Cla005076,Cla008692,Cla001251,Cla007350,Cla018195,Cla005761,Cla018436,Cla014746,Cla021734,Cla012569,Cla011902,Cla020543,Cla023338,Cla023465,Cla013570,Cla0105…
GO:0015085	calcium ion transmembrane transporter activity	molecular_function	0.058735	0.55124	7	2218	25	15506	Cla021209,Cla017037,Cla014389,Cla010562,Cla005619,Cla008341,Cla014150
GO:0098655	cation transmembrane transport	biological_process	0.058899	0.55162	43	2218	239	15506	Cla011267,Novel00965,Cla002648,Cla022333,Cla019529,Cla015019,Cla003774,Cla013992,Novel00404,Cla014100,Cla018195,Cla020816,Cla002271,Cla003644,Cla014389,Novel00471,Cla020164,Cla007613,Cla019797,Cla010562,Cla015238,Cla011094,Novel00571,Cla019297,Cla019977,Cla019380,Cla015497,Cla021131,Cla023166,Novel00841,Novel01098,Cla022292,Cla014452,Cla017266,Cla003005,Cla019971,Cla009088,Cla015211,Cla022440,Cla…
GO:0004555	alpha,alpha-trehalase activity	molecular_function	0.059537	0.55527	2	2218	3	15506	Cla011371,Cla011369
GO:0015927	trehalase activity	molecular_function	0.059537	0.55527	2	2218	3	15506	Cla011369,Cla011371
GO:0016853	isomerase activity	molecular_function	0.060332	0.56151	36	2218	190	15506	Cla019374,Cla014751,Cla018056,Cla012105,Cla005571,Cla012104,Cla008834,Cla007409,Cla017086,Cla018547,Cla013600,Cla013309,Cla019299,Cla007294,Cla016531,Cla009327,Cla013749,Cla013362,Cla022804,Cla003938,Cla018918,Cla005589,Cla002361,Cla013768,Cla001502,Cla019106,Cla022499,Cla017988,Novel01098,Cla022170,Cla012154,Cla018594,Cla022928,Cla013639,Cla002359,Cla016115
GO:0007006	mitochondrial membrane organization	biological_process	0.061402	0.57027	3	2218	7	15506	Cla022686,Cla008887,Cla004074
GO:0031683	G-protein beta/gamma-subunit complex binding	molecular_function	0.061737	0.57219	11	2218	49	15506	Cla012278,Cla015527,Cla009259,Cla022844,Cla018469,Cla010285,Cla010071,Cla009157,Cla019958,Cla010079,Cla000798
GO:0009200	deoxyribonucleoside triphosphate metabolic process	biological_process	0.062659	0.57358	2	2218	3	15506	Cla022500,Novel01082
GO:0009211	pyrimidine deoxyribonucleoside triphosphate metabolic process	biological_process	0.062659	0.57358	2	2218	3	15506	Cla022500,Novel01082
GO:0046080	dUTP metabolic process	biological_process	0.062659	0.57358	2	2218	3	15506	Novel01082,Cla022500
GO:0008252	nucleotidase activity	molecular_function	0.062671	0.57358	2	2218	3	15506	Cla011125,Cla019056
GO:0008253	5'-nucleotidase activity	molecular_function	0.062671	0.57358	2	2218	3	15506	Cla011125,Cla019056
GO:0005789	endoplasmic reticulum membrane	cellular_component	0.062807	0.57358	23	2218	117	15506	Cla018660,Cla016167,Cla008837,Cla005247,Novel00643,Cla000539,Novel00173,Cla007737,Cla021209,Cla010295,Cla001251,Cla005076,Cla008829,Novel00411,Cla015603,Cla022977,Cla013328,Cla009165,Cla001677,Cla013527,Cla022724,Cla018469,Cla018210
GO:0004334	fumarylacetoacetase activity	molecular_function	0.063045	0.57358	2	2218	3	15506	Cla013040,Cla014407
GO:0016822	hydrolase activity, acting on acid carbon-carbon bonds	molecular_function	0.063045	0.57358	2	2218	3	15506	Cla014407,Cla013040
GO:0016823	hydrolase activity, acting on acid carbon-carbon bonds, in ketonic substances	molecular_function	0.063045	0.57358	2	2218	3	15506	Cla014407,Cla013040
GO:0006119	oxidative phosphorylation	biological_process	0.063774	0.57726	7	2218	25	15506	Cla011555,Cla020955,Cla014391,Cla018556,Cla017692,Cla005456,Cla009906
GO:0042773	ATP synthesis coupled electron transport	biological_process	0.063774	0.57726	7	2218	25	15506	Cla014391,Cla018556,Cla009906,Cla017692,Cla005456,Cla020955,Cla011555
GO:0016709	oxidoreductase activity, acting on paired donors, with incorporation or reduction of molecular oxygen, NAD(P)H as one donor, and incorporation of one atom of oxygen	molecular_function	0.063837	0.57726	9	2218	36	15506	Cla006885,Cla011132,Cla016120,Cla006886,Cla020214,Cla005671,Cla002818,Cla004245,Cla001251
GO:0009086	methionine biosynthetic process	biological_process	0.064417	0.58132	3	2218	7	15506	Cla017149,Cla002903,Cla017148
GO:0006487	protein N-linked glycosylation	biological_process	0.064759	0.58323	4	2218	11	15506	Cla005076,Cla010295,Cla015603,Cla000921
GO:0003954	NADH dehydrogenase activity	molecular_function	0.066419	0.59645	8	2218	31	15506	Cla009906,Cla005456,Novel00868,Cla018556,Cla002352,Cla005994,Novel00908,Cla016936
GO:0044255	cellular lipid metabolic process	biological_process	0.066586	0.59645	65	2218	381	15506	Cla014409,Cla003928,Cla004566,Novel00212,Cla015797,Cla009256,Cla021318,Cla007303,Cla022442,Cla009294,Cla004167,Cla006743,Cla010898,Cla006940,Cla016167,Cla000539,Cla016773,Cla014654,Cla010547,Cla000194,Cla020432,Cla014460,Cla008975,Cla020689,Cla003665,Cla020476,Cla001947,Cla017158,Cla005283,Cla022004,Cla002818,Cla001148,Cla015621,Cla009015,Cla021734,Cla013862,Cla001251,Cla009348,Cla009347,Cla02136…
GO:0044248	cellular catabolic process	biological_process	0.066629	0.59645	72	2218	418	15506	Cla021734,Cla012513,Cla016667,Cla022241,Cla018240,Cla016465,Cla018433,Cla008089,Cla009478,Cla000199,Cla018314,Cla014927,Cla010280,Cla006031,Cla013158,Cla010900,Cla000555,Cla014339,Cla010434,Cla016611,Cla016926,Cla016671,Cla021934,Cla000667,Cla018172,Cla008915,Cla016041,Cla015822,Cla022235,Cla003262,Cla004612,Cla006584,Cla020697,Cla019376,Cla010538,Novel01082,Cla023166,Cla023283,Cla022476,Cla01739…
GO:0000981	RNA polymerase II transcription factor activity, sequence-specific DNA binding	molecular_function	0.067332	0.60153	4	2218	11	15506	Cla010793,Novel00411,Novel01239,Cla022679
GO:0016779	nucleotidyltransferase activity	molecular_function	0.068289	0.60887	56	2218	329	15506	Cla007587,Cla012411,Cla004469,Cla004490,Cla021209,Cla010997,Cla003005,Cla021949,Cla017266,Cla008376,Novel01240,Cla021436,Cla021816,Cla001468,Cla016385,Cla019316,Cla014303,Cla012972,Cla009879,Cla001518,Cla015498,Cla007817,Cla012739,Cla010754,Cla008299,Cla013902,Cla008676,Cla008341,Cla002582,Cla020047,Cla009133,Cla004566,Cla017742,Cla019255,Cla005283,Cla012928,Cla003999,Cla021208,Cla008066,Cla01703…
GO:0046365	monosaccharide catabolic process	biological_process	0.069658	0.61983	3	2218	7	15506	Cla008834,Cla013639,Cla012154
GO:0007166	cell surface receptor signaling pathway	biological_process	0.070186	0.62328	12	2218	53	15506	Novel00908,Cla018210,Cla003947,Cla009676,Cla008434,Cla004747,Cla012743,Cla021690,Cla009301,Cla005899,Novel00689,Cla007461
GO:0004619	phosphoglycerate mutase activity	molecular_function	0.071113	0.63027	3	2218	7	15506	Cla012154,Cla008834,Cla013639
GO:0000439	core TFIIH complex	cellular_component	0.072355	0.64	3	2218	7	15506	Novel00204,Cla009612,Cla014316
GO:0032465	regulation of cytokinesis	biological_process	0.072626	0.64112	3	2218	7	15506	Cla005564,Cla017500,Novel00688
GO:0004427	inorganic diphosphatase activity	molecular_function	0.073065	0.64372	4	2218	12	15506	Cla006735,Cla014222,Cla018245,Cla012942
GO:0017004	cytochrome complex assembly	biological_process	0.074342	0.65368	7	2218	27	15506	Cla021806,Cla001593,Cla014321,Cla011749,Cla007824,Novel00933,Cla000813
GO:0051119	sugar transmembrane transporter activity	molecular_function	0.074618	0.65482	3	2218	7	15506	Cla007212,Cla000731,Cla006870
GO:0016811	hydrolase activity, acting on carbon-nitrogen (but not peptide) bonds, in linear amides	molecular_function	0.07544	0.66073	6	2218	21	15506	Cla003928,Cla017500,Cla011799,Cla014409,Cla000194,Cla016041
GO:0016020	membrane	cellular_component	0.076264	0.66664	510	2218	3418	15506	Cla006484,Cla016842,Cla018245,Cla014358,Cla012523,Cla008545,Novel00827,Cla012748,Cla017964,Cla004597,Cla015498,Cla017541,Novel00841,Cla015755,Cla010875,Cla004353,Cla012972,Cla005570,Cla021354,Cla016826,Cla003005,Cla007837,Cla013971,Cla018416,Cla019971,Cla011151,Cla018198,Cla022278,Cla017450,Novel01304,Cla021378,Cla020558,Cla000667,Cla016739,Cla015490,Cla003667,Cla014815,Cla020122,Cla010961,Cla006…
GO:0008964	phosphoenolpyruvate carboxylase activity	molecular_function	0.078281	0.67843	2	2218	4	15506	Cla002312,Cla000142
GO:0009267	cellular response to starvation	biological_process	0.078374	0.67843	3	2218	7	15506	Novel01082,Cla019376,Cla011578
GO:0031667	response to nutrient levels	biological_process	0.078374	0.67843	3	2218	7	15506	Cla019376,Cla011578,Novel01082
GO:0031669	cellular response to nutrient levels	biological_process	0.078374	0.67843	3	2218	7	15506	Novel01082,Cla019376,Cla011578
GO:0042594	response to starvation	biological_process	0.078374	0.67843	3	2218	7	15506	Novel01082,Cla019376,Cla011578
GO:0031300	intrinsic component of organelle membrane	cellular_component	0.078926	0.68056	12	2218	54	15506	Cla018939,Cla013328,Novel00643,Cla018660,Cla008829,Novel00411,Cla018940,Cla006271,Cla007350,Cla006926,Cla022724,Cla004848
GO:0031301	integral component of organelle membrane	cellular_component	0.078926	0.68056	12	2218	54	15506	Cla006926,Cla007350,Cla018940,Cla006271,Cla022724,Cla004848,Cla018939,Cla013328,Novel00643,Novel00411,Cla008829,Cla018660
GO:0033743	peptide-methionine (R)-S-oxide reductase activity	molecular_function	0.080193	0.68952	3	2218	7	15506	Cla023167,Cla012950,Cla023299
GO:0042175	nuclear outer membrane-endoplasmic reticulum membrane network	cellular_component	0.080274	0.68952	23	2218	120	15506	Cla010295,Cla005076,Cla001251,Cla016167,Cla018660,Novel00643,Cla008837,Cla005247,Cla021209,Novel00173,Cla007737,Cla000539,Cla001677,Cla022724,Cla013527,Cla018469,Cla018210,Novel00411,Cla008829,Cla022977,Cla015603,Cla013328,Cla009165
GO:0000902	cell morphogenesis	biological_process	0.080689	0.69025	8	2218	34	15506	Cla000858,Novel00827,Cla006484,Cla009901,Cla004677,Cla012513,Cla015431,Cla004683
GO:0032989	cellular component morphogenesis	biological_process	0.080689	0.69025	8	2218	34	15506	Cla004683,Cla012513,Cla015431,Cla006484,Cla004677,Cla009901,Novel00827,Cla000858
GO:0005623	cell	cellular_component	0.080978	0.69025	544	2218	3596	15506	Novel00485,Cla023467,Cla013668,Cla020208,Cla022686,Cla018917,Cla011177,Cla019797,Cla005036,Cla006594,Cla003394,Cla021113,Cla011395,Cla012154,Cla019293,Cla017734,Novel00891,Cla002444,Novel00411,Cla021375,Cla017117,Cla005941,Cla017123,Cla011721,Cla009632,Cla020737,Cla003572,Novel01082,Cla009791,Cla010336,Cla014321,Cla002346,Cla010538,Cla018359,Cla019225,Cla016115,Cla017202,Cla014150,Cla015466,Cla00…
GO:0044464	cell part	cellular_component	0.080978	0.69025	544	2218	3596	15506	Cla007846,Cla004935,Cla013570,Cla015497,Novel01239,Cla004031,Cla004983,Novel00571,Cla018143,Cla022999,Cla020190,Novel01111,Cla016926,Cla013782,Cla022235,Cla013639,Cla007066,Cla011138,Cla018460,Cla012694,Cla023484,Cla013337,Cla013688,Cla006136,Cla015647,Cla005761,Cla010423,Cla018976,Cla004291,Cla016554,Novel00273,Cla012958,Cla019056,Cla019026,Cla004074,Cla001947,Cla018293,Cla023264,Cla022008,Cla00…
GO:0004488	methylenetetrahydrofolate dehydrogenase (NADP+) activity	molecular_function	0.08135	0.6921	6	2218	21	15506	Cla021251,Cla003989,Cla010547,Cla014068,Cla004284,Cla016386
GO:0045259	proton-transporting ATP synthase complex	cellular_component	0.0833	0.70733	15	2218	70	15506	Cla014452,Novel01098,Cla019971,Cla003005,Cla019380,Novel00471,Cla015497,Cla019834,Cla022333,Cla003644,Novel00965,Cla020816,Cla021378,Cla016840,Cla020164
GO:0009073	aromatic amino acid family biosynthetic process	biological_process	0.084492	0.7134	6	2218	22	15506	Novel00268,Cla004999,Cla013776,Cla016673,Cla016672,Cla005344
GO:0004583	dolichyl-phosphate-glucose-glycolipid alpha-glucosyltransferase activity	molecular_function	0.084494	0.7134	2	2218	4	15506	Cla018210,Cla009165
GO:0006488	dolichol-linked oligosaccharide biosynthetic process	biological_process	0.084494	0.7134	2	2218	4	15506	Cla009165,Cla018210
GO:0006536	glutamate metabolic process	biological_process	0.086027	0.72315	3	2218	8	15506	Cla005589,Cla009782,Cla004245
GO:0016624	oxidoreductase activity, acting on the aldehyde or oxo group of donors, disulfide as acceptor	molecular_function	0.086086	0.72315	4	2218	13	15506	Cla021318,Cla009347,Cla006743,Cla013777
GO:0008172	S-methyltransferase activity	molecular_function	0.086136	0.72315	5	2218	18	15506	Cla017148,Cla002903,Cla012753,Cla017149,Cla006797
GO:0009095	aromatic amino acid family biosynthetic process, prephenate pathway	biological_process	0.086436	0.72431	4	2218	12	15506	Cla004999,Novel00268,Cla016673,Cla016672
GO:0010008	endosome membrane	cellular_component	0.087239	0.72967	2	2218	4	15506	Cla008692,Cla011936
GO:0044780	bacterial-type flagellum assembly	biological_process	0.087857	0.73208	4	2218	12	15506	Cla018240,Cla004345,Cla020276,Cla013650
GO:0044781	bacterial-type flagellum organization	biological_process	0.087857	0.73208	4	2218	12	15506	Cla018240,Cla004345,Cla020276,Cla013650
GO:0031966	mitochondrial membrane	cellular_component	0.088435	0.73248	32	2218	173	15506	Cla009906,Cla013730,Cla015497,Cla022686,Cla020053,Cla008887,Cla000667,Cla019834,Cla010292,Cla021891,Cla017692,Cla019971,Cla003005,Novel01098,Cla006136,Cla011011,Cla007619,Cla011555,Novel00965,Cla010745,Cla009215,Cla003667,Cla009207,Cla018556,Cla004074,Novel00471,Cla001181,Cla020816,Novel00688,Cla021734,Cla020955,Cla018895
GO:0006220	pyrimidine nucleotide metabolic process	biological_process	0.088443	0.73248	5	2218	17	15506	Cla009301,Novel01082,Cla022500,Cla005471,Cla016577
GO:0071949	FAD binding	molecular_function	0.088562	0.73248	16	2218	80	15506	Cla001251,Cla022293,Cla019109,Cla010898,Cla006885,Cla005283,Cla002818,Cla020476,Cla023248,Cla011810,Cla004245,Cla018407,Cla003751,Cla014518,Cla005671,Cla020214
GO:0070567	cytidylyltransferase activity	molecular_function	0.088848	0.73327	3	2218	8	15506	Novel00212,Cla004566,Cla008299
GO:0051336	regulation of hydrolase activity	biological_process	0.089023	0.73327	5	2218	17	15506	Cla011084,Cla013688,Cla008692,Cla021916,Cla016001
GO:0004506	squalene monooxygenase activity	molecular_function	0.089296	0.73327	3	2218	8	15506	Cla002818,Cla020214,Cla001251
GO:0045132	meiotic chromosome segregation	biological_process	0.089314	0.73327	4	2218	12	15506	Cla014433,Cla007656,Cla022431,Cla008555
GO:0008417	fucosyltransferase activity	molecular_function	0.090365	0.73846	3	2218	8	15506	Cla016014,Cla010205,Cla018595
GO:0009360	DNA polymerase III complex	cellular_component	0.090892	0.73846	4	2218	13	15506	Cla014303,Cla003084,Cla015001,Novel01240
GO:0042575	DNA polymerase complex	cellular_component	0.090892	0.73846	4	2218	13	15506	Cla014303,Cla015001,Novel01240,Cla003084
GO:0003707	steroid hormone receptor activity	molecular_function	0.092329	0.73846	4	2218	12	15506	Novel00411,Cla010171,Cla019293,Cla010793
GO:0005496	steroid binding	molecular_function	0.092329	0.73846	4	2218	12	15506	Novel00411,Cla019293,Cla010171,Cla010793
GO:0007219	Notch signaling pathway	biological_process	0.092704	0.73846	3	2218	8	15506	Cla009301,Cla008434,Cla004747
GO:0008107	galactoside 2-alpha-L-fucosyltransferase activity	molecular_function	0.092727	0.73846	2	2218	4	15506	Cla010205,Cla018595
GO:0031127	alpha-(1,2)-fucosyltransferase activity	molecular_function	0.092727	0.73846	2	2218	4	15506	Cla018595,Cla010205
GO:0006813	potassium ion transport	biological_process	0.092805	0.73846	19	2218	99	15506	Cla020293,Novel00404,Cla019644,Cla010691,Cla015027,Cla021327,Cla016672,Novel01071,Cla008358,Cla005671,Cla010547,Cla021250,Cla009747,Cla016566,Cla015028,Cla012949,Cla006331,Cla016673,Cla020476
GO:0003013	circulatory system process	biological_process	0.092929	0.73846	2	2218	4	15506	Cla014248,Cla014068
GO:0003018	vascular process in circulatory system	biological_process	0.092929	0.73846	2	2218	4	15506	Cla014068,Cla014248
GO:0008015	blood circulation	biological_process	0.092929	0.73846	2	2218	4	15506	Cla014248,Cla014068
GO:0019229	regulation of vasoconstriction	biological_process	0.092929	0.73846	2	2218	4	15506	Cla014068,Cla014248
GO:0035150	regulation of tube size	biological_process	0.092929	0.73846	2	2218	4	15506	Cla014068,Cla014248
GO:0042310	vasoconstriction	biological_process	0.092929	0.73846	2	2218	4	15506	Cla014248,Cla014068
GO:0044057	regulation of system process	biological_process	0.092929	0.73846	2	2218	4	15506	Cla014068,Cla014248
GO:0050880	regulation of blood vessel size	biological_process	0.092929	0.73846	2	2218	4	15506	Cla014248,Cla014068
GO:1903522	regulation of blood circulation	biological_process	0.092929	0.73846	2	2218	4	15506	Cla014248,Cla014068
GO:0001503	ossification	biological_process	0.093097	0.73848	4	2218	13	15506	Cla011668,Cla008676,Cla017742,Cla019527
GO:0004325	ferrochelatase activity	molecular_function	0.093764	0.74245	2	2218	4	15506	Cla002033,Cla022670
GO:0051716	cellular response to stimulus	biological_process	0.094093	0.74373	170	2218	1097	15506	Cla010079,Novel01119,Cla002747,Cla004222,Cla018210,Cla009478,Cla013337,Cla004257,Cla015315,Cla010723,Cla005899,Cla017615,Cla019645,Cla018885,Cla019498,Cla016137,Cla020858,Cla021734,Cla004747,Cla008703,Cla002350,Cla007709,Cla013455,Cla014303,Cla007972,Cla022844,Cla007398,Cla010793,Cla002891,Cla019885,Cla015337,Novel00249,Cla017036,Cla012753,Cla022984,Cla018501,Cla022333,Cla017255,Novel00204,Cla019…
GO:0015075	ion transmembrane transporter activity	molecular_function	0.094574	0.74568	111	2218	703	15506	Cla006484,Cla004473,Cla010562,Cla018888,Cla015238,Cla022844,Cla019527,Cla008897,Novel00571,Cla022868,Cla015497,Cla005619,Cla021405,Cla021131,Novel00841,Cla023166,Cla000525,Cla012810,Cla021367,Cla022292,Novel01098,Cla003005,Cla005926,Cla017266,Cla008029,Cla014344,Cla023225,Cla016926,Cla010691,Cla003303,Cla019971,Cla020867,Cla009088,Cla015211,Novel01304,Cla016840,Cla021378,Cla014150,Cla015490,Cla00…
GO:0046483	heterocycle metabolic process	biological_process	0.094727	0.74568	490	2218	3266	15506	Cla010875,Cla013766,Cla019316,Cla009670,Cla015498,Cla007817,Cla010754,Cla007434,Cla009557,Cla019304,Cla013749,Cla016436,Cla006484,Cla014905,Cla015804,Cla021378,Cla006791,Cla006188,Cla016041,Cla007462,Cla018198,Cla006509,Cla003902,Cla019971,Cla013695,Cla016822,Cla003005,Cla010434,Cla007837,Cla005050,Cla017266,Cla005450,Cla022670,Novel00580,Novel00306,Cla008294,Cla021037,Cla014422,Cla014433,Cla0036…
GO:0004420	hydroxymethylglutaryl-CoA reductase (NADPH) activity	molecular_function	0.094841	0.74568	2	2218	4	15506	Cla015723,Cla001204
GO:0004733	pyridoxamine-phosphate oxidase activity	molecular_function	0.097416	0.75966	2	2218	4	15506	Cla008070,Cla012129
GO:0006879	cellular iron ion homeostasis	biological_process	0.097471	0.75966	2	2218	4	15506	Cla007239,Cla022024
GO:0046916	cellular transition metal ion homeostasis	biological_process	0.097471	0.75966	2	2218	4	15506	Cla007239,Cla022024
GO:0055072	iron ion homeostasis	biological_process	0.097471	0.75966	2	2218	4	15506	Cla022024,Cla007239
GO:0055076	transition metal ion homeostasis	biological_process	0.097471	0.75966	2	2218	4	15506	Cla007239,Cla022024
GO:0030313	cell envelope	cellular_component	0.097654	0.75976	4	2218	13	15506	Cla011373,Cla002376,Cla005387,Cla012201
GO:0006396	RNA processing	biological_process	0.097857	0.76001	87	2218	542	15506	Cla002747,Cla018314,Cla014518,Cla003751,Cla018438,Cla010791,Cla020915,Cla002517,Cla004245,Cla014422,Cla006029,Cla011810,Cla018666,Cla021795,Cla018407,Cla009035,Cla020276,Cla004278,Cla005283,Cla012928,Cla021247,Cla004257,Cla004317,Cla002818,Cla012958,Cla011409,Cla001251,Cla010098,Cla016615,Cla014303,Cla016736,Cla009557,Cla016436,Cla023248,Cla014905,Cla016840,Cla019971,Cla013695,Cla005050,Cla016822…
GO:0098805	whole membrane	cellular_component	0.098906	0.76327	33	2218	186	15506	Cla000667,Cla008887,Cla010292,Cla006988,Cla021891,Cla006926,Cla011920,Cla012569,Cla013730,Cla022686,Cla020053,Cla004848,Cla013570,Cla006271,Cla009207,Cla004074,Cla018406,Cla011936,Cla016554,Cla018195,Novel00688,Cla021734,Cla018895,Cla008692,Cla013992,Cla018940,Cla011011,Cla007619,Cla008070,Cla018939,Cla010745,Cla009215,Cla003667
GO:0050518	2-C-methyl-D-erythritol 4-phosphate cytidylyltransferase activity	molecular_function	0.099061	0.76327	2	2218	4	15506	Novel00212,Cla004566
GO:0008013	beta-catenin binding	molecular_function	0.099613	0.76327	4	2218	13	15506	Cla018210,Novel00908,Cla012262,Cla009676
GO:0019079	viral genome replication	biological_process	0.09963	0.76327	10	2218	47	15506	Cla018314,Cla005201,Cla016736,Cla002350,Cla017808,Cla004874,Cla012284,Cla010650,Cla004278,Cla008692
GO:0004114	3',5'-cyclic-nucleotide phosphodiesterase activity	molecular_function	0.099684	0.76327	2	2218	4	15506	Cla009242,Cla003262
GO:0071495	cellular response to endogenous stimulus	biological_process	0.10011	0.76327	3	2218	8	15506	Cla019293,Cla010171,Cla011936
GO:0042181	ketone biosynthetic process	biological_process	0.10017	0.76327	3	2218	8	15506	Cla014854,Cla004584,Cla007239
GO:1901661	quinone metabolic process	biological_process	0.10017	0.76327	3	2218	8	15506	Cla014854,Cla004584,Cla007239
GO:1901663	quinone biosynthetic process	biological_process	0.10017	0.76327	3	2218	8	15506	Cla014854,Cla004584,Cla007239
GO:0007031	peroxisome organization	biological_process	0.10088	0.76327	5	2218	18	15506	Cla006271,Cla018940,Cla006926,Cla018939,Cla004848
GO:0006004	fucose metabolic process	biological_process	0.10094	0.76327	2	2218	4	15506	Cla016115,Cla019106
GO:0008736	L-fucose isomerase activity	molecular_function	0.10094	0.76327	2	2218	4	15506	Cla019106,Cla016115
GO:0009294	DNA mediated transformation	biological_process	0.10105	0.76327	2	2218	4	15506	Cla006353,Cla020286
GO:0008677	2-dehydropantoate 2-reductase activity	molecular_function	0.10142	0.76327	8	2218	33	15506	Cla005671,Cla012602,Cla004999,Cla001251,Cla006331,Cla016673,Cla016672,Cla007303
GO:0004656	procollagen-proline 4-dioxygenase activity	molecular_function	0.1015	0.76327	2	2218	4	15506	Novel00273,Cla002093
GO:0019798	procollagen-proline dioxygenase activity	molecular_function	0.1015	0.76327	2	2218	4	15506	Cla002093,Novel00273
GO:0031543	peptidyl-proline dioxygenase activity	molecular_function	0.1015	0.76327	2	2218	4	15506	Novel00273,Cla002093
GO:0031545	peptidyl-proline 4-dioxygenase activity	molecular_function	0.1015	0.76327	2	2218	4	15506	Novel00273,Cla002093
GO:0006139	nucleobase-containing compound metabolic process	biological_process	0.10153	0.76327	455	2218	3036	15506	Cla015555,Cla010098,Cla019107,Cla019498,Cla007820,Cla019653,Cla023189,Cla002818,Cla008577,Cla017444,Cla004257,Cla010281,Novel01185,Cla012958,Cla005031,Cla005283,Cla020047,Cla003039,Cla017742,Cla020276,Cla020079,Cla023103,Cla000691,Cla023484,Cla006029,Cla013337,Cla021782,Cla015647,Cla021257,Cla015485,Cla017722,Cla014455,Cla013433,Cla021430,Cla012753,Cla014643,Cla021949,Cla011341,Cla022235,Cla00776…
GO:0016469	proton-transporting two-sector ATPase complex	cellular_component	0.1017	0.76327	30	2218	164	15506	Cla018195,Cla019971,Cla003005,Novel01098,Cla022292,Cla014452,Cla014100,Cla013992,Cla007613,Cla021378,Novel01304,Cla020164,Cla016840,Cla022440,Cla019834,Cla003644,Cla014389,Novel00471,Cla009088,Cla020816,Cla002271,Cla019797,Cla023166,Cla015019,Cla022333,Cla019529,Cla019380,Cla015497,Novel00965,Cla019297
GO:0000156	phosphorelay response regulator activity	molecular_function	0.10283	0.77045	2	2218	4	15506	Cla005491,Cla013455
GO:0004347	glucose-6-phosphate isomerase activity	molecular_function	0.10362	0.7745	2	2218	4	15506	Cla022499,Cla022170
GO:0030284	estrogen receptor activity	molecular_function	0.10372	0.7745	2	2218	4	15506	Cla019293,Cla010171
GO:0004367	glycerol-3-phosphate dehydrogenase [NAD+] activity	molecular_function	0.10417	0.77656	2	2218	4	15506	Cla007303,Cla004639
GO:0090150	establishment of protein localization to membrane	biological_process	0.10521	0.77864	15	2218	76	15506	Cla019070,Cla004074,Cla020551,Cla008887,Novel00643,Cla007369,Cla017560,Cla022686,Cla023201,Cla021256,Cla016465,Cla022698,Cla022724,Cla007370,Cla005583
GO:0015035	protein disulfide oxidoreductase activity	molecular_function	0.10621	0.77864	15	2218	71	15506	Cla009615,Cla006447,Cla002517,Cla022460,Cla022682,Cla021415,Cla009094,Novel00317,Cla007427,Cla010417,Cla017688,Cla011786,Cla022408,Cla014328,Cla003456
GO:0015036	disulfide oxidoreductase activity	molecular_function	0.10621	0.77864	15	2218	71	15506	Cla014328,Cla022408,Cla003456,Cla011786,Cla007427,Novel00317,Cla010417,Cla009094,Cla022682,Cla021415,Cla017688,Cla006447,Cla009615,Cla022460,Cla002517
GO:0004852	uroporphyrinogen-III synthase activity	molecular_function	0.10635	0.77864	2	2218	4	15506	Cla012137,Cla014760
GO:0001504	neurotransmitter uptake	biological_process	0.10672	0.77864	1	2218	1	15506	Novel01240
GO:0001505	regulation of neurotransmitter levels	biological_process	0.10672	0.77864	1	2218	1	15506	Novel01240
GO:0050805	negative regulation of synaptic transmission	biological_process	0.10672	0.77864	1	2218	1	15506	Novel01240
GO:0050827	toxin receptor binding	molecular_function	0.10672	0.77864	1	2218	1	15506	Novel01240
GO:0051580	regulation of neurotransmitter uptake	biological_process	0.10672	0.77864	1	2218	1	15506	Novel01240
GO:0051581	negative regulation of neurotransmitter uptake	biological_process	0.10672	0.77864	1	2218	1	15506	Novel01240
GO:0051588	regulation of neurotransmitter transport	biological_process	0.10672	0.77864	1	2218	1	15506	Novel01240
GO:0051589	negative regulation of neurotransmitter transport	biological_process	0.10672	0.77864	1	2218	1	15506	Novel01240
GO:0051609	inhibition of neurotransmitter uptake	biological_process	0.10672	0.77864	1	2218	1	15506	Novel01240
GO:0017137	Rab GTPase binding	molecular_function	0.10742	0.77888	1	2218	1	15506	Cla016001
GO:0044161	host cell cytoplasmic vesicle	cellular_component	0.10742	0.77888	1	2218	1	15506	Cla016001
GO:0016758	transferase activity, transferring hexosyl groups	molecular_function	0.10817	0.77888	58	2218	352	15506	Cla023275,Cla008975,Cla008385,Cla007689,Cla012973,Cla004918,Cla003152,Cla008325,Cla012972,Cla000921,Cla012631,Cla023338,Cla015604,Cla018595,Novel01170,Cla021407,Cla004473,Cla012748,Cla007500,Cla015692,Cla023274,Cla020558,Cla006940,Cla011828,Cla004297,Cla006379,Cla014428,Cla016926,Cla023272,Cla009165,Cla013087,Cla022078,Cla009592,Cla018849,Novel00689,Cla018210,Cla003320,Cla016027,Cla023286,Cla0160…
GO:0043154	negative regulation of cysteine-type endopeptidase activity involved in apoptotic process	biological_process	0.10849	0.77888	1	2218	1	15506	Cla008692
GO:0043281	regulation of cysteine-type endopeptidase activity involved in apoptotic process	biological_process	0.10849	0.77888	1	2218	1	15506	Cla008692
GO:2000116	regulation of cysteine-type endopeptidase activity	biological_process	0.10849	0.77888	1	2218	1	15506	Cla008692
GO:2000117	negative regulation of cysteine-type endopeptidase activity	biological_process	0.10849	0.77888	1	2218	1	15506	Cla008692
GO:0006269	DNA replication, synthesis of RNA primer	biological_process	0.10861	0.77888	3	2218	9	15506	Cla021436,Cla001518,Cla012411
GO:0098599	palmitoyl hydrolase activity	molecular_function	0.10977	0.77888	2	2218	4	15506	Cla003660,Cla003659
GO:0008199	ferric iron binding	molecular_function	0.10994	0.77888	3	2218	9	15506	Cla000771,Cla022024,Cla007239
GO:0004888	transmembrane signaling receptor activity	molecular_function	0.11008	0.77888	15	2218	82	15506	Cla020056,Cla007745,Cla016926,Cla003303,Cla006317,Cla004473,Cla020286,Cla009747,Cla012575,Novel00518,Cla007461,Cla007674,Cla018794,Cla015498,Cla007073
GO:0000977	RNA polymerase II regulatory region sequence-specific DNA binding	molecular_function	0.11078	0.77888	1	2218	1	15506	Novel01239
GO:0000978	RNA polymerase II core promoter proximal region sequence-specific DNA binding	molecular_function	0.11078	0.77888	1	2218	1	15506	Novel01239
GO:0000982	transcription factor activity, RNA polymerase II core promoter proximal region sequence-specific binding	molecular_function	0.11078	0.77888	1	2218	1	15506	Novel01239
GO:0000987	core promoter proximal region sequence-specific DNA binding	molecular_function	0.11078	0.77888	1	2218	1	15506	Novel01239
GO:0001012	RNA polymerase II regulatory region DNA binding	molecular_function	0.11078	0.77888	1	2218	1	15506	Novel01239
GO:0001159	core promoter proximal region DNA binding	molecular_function	0.11078	0.77888	1	2218	1	15506	Novel01239
GO:0003887	DNA-directed DNA polymerase activity	molecular_function	0.11094	0.77888	16	2218	82	15506	Cla008396,Cla008676,Cla008341,Cla002582,Cla015001,Cla016385,Cla014303,Cla021949,Cla003005,Novel01240,Cla003084,Cla001468,Cla019255,Cla017742,Cla003575,Cla008066
GO:0031975	envelope	cellular_component	0.11114	0.77888	39	2218	222	15506	Cla020053,Cla013730,Cla009906,Cla022686,Cla015497,Cla003005,Cla021891,Cla019971,Cla017692,Novel01098,Cla015466,Cla005387,Cla000667,Cla008887,Cla010292,Cla019834,Cla009215,Cla012694,Cla003667,Cla002376,Cla012201,Cla006136,Cla007619,Cla011011,Cla011555,Novel00965,Cla010745,Novel01194,Novel00688,Cla021734,Cla020955,Cla018895,Cla011373,Cla018556,Cla004074,Cla009207,Cla001181,Cla020816,Novel00471
GO:0007127	meiosis I	biological_process	0.11161	0.77888	4	2218	13	15506	Cla022431,Cla007656,Cla008555,Cla014433
GO:0005294	neutral L-amino acid secondary active transmembrane transporter activity	molecular_function	0.11221	0.77888	1	2218	1	15506	Cla019527
GO:0015175	neutral amino acid transmembrane transporter activity	molecular_function	0.11221	0.77888	1	2218	1	15506	Cla019527
GO:0015655	alanine:sodium symporter activity	molecular_function	0.11221	0.77888	1	2218	1	15506	Cla019527
GO:0015804	neutral amino acid transport	biological_process	0.11221	0.77888	1	2218	1	15506	Cla019527
GO:0022858	alanine transmembrane transporter activity	molecular_function	0.11221	0.77888	1	2218	1	15506	Cla019527
GO:0032328	alanine transport	biological_process	0.11221	0.77888	1	2218	1	15506	Cla019527
GO:0010024	phytochromobilin biosynthetic process	biological_process	0.11259	0.77888	2	2218	4	15506	Cla006332,Cla020208
GO:0016636	oxidoreductase activity, acting on the CH-CH group of donors, iron-sulfur protein as acceptor	molecular_function	0.11259	0.77888	2	2218	4	15506	Cla020208,Cla006332
GO:0050897	cobalt ion binding	molecular_function	0.11259	0.77888	2	2218	4	15506	Cla006332,Cla020208
GO:0051202	phytochromobilin metabolic process	biological_process	0.11259	0.77888	2	2218	4	15506	Cla006332,Cla020208
GO:0042180	cellular ketone metabolic process	biological_process	0.11275	0.77888	4	2218	13	15506	Cla014854,Cla004584,Cla007239,Cla016041
GO:0032954	regulation of cytokinetic process	biological_process	0.11304	0.77888	2	2218	4	15506	Cla005564,Cla017500
GO:0032955	regulation of barrier septum assembly	biological_process	0.11304	0.77888	2	2218	4	15506	Cla017500,Cla005564
GO:1901891	regulation of cell septum assembly	biological_process	0.11304	0.77888	2	2218	4	15506	Cla017500,Cla005564
GO:1902412	regulation of mitotic cytokinesis	biological_process	0.11304	0.77888	2	2218	4	15506	Cla017500,Cla005564
GO:1903436	regulation of mitotic cytokinetic process	biological_process	0.11304	0.77888	2	2218	4	15506	Cla005564,Cla017500
GO:0005777	peroxisome	cellular_component	0.11345	0.7793	6	2218	24	15506	Cla004848,Cla003665,Cla006926,Cla018940,Cla006271,Cla018939
GO:0042579	microbody	cellular_component	0.11345	0.7793	6	2218	24	15506	Cla004848,Cla018939,Cla018940,Cla006271,Cla006926,Cla003665
GO:0016730	oxidoreductase activity, acting on iron-sulfur proteins as donors	molecular_function	0.11401	0.78098	2	2218	4	15506	Cla005682,Cla010377
GO:0016706	oxidoreductase activity, acting on paired donors, with incorporation or reduction of molecular oxygen, 2-oxoglutarate as one donor, and incorporation of one atom each of oxygen into both donors	molecular_function	0.11427	0.78098	4	2218	14	15506	Cla011870,Cla002093,Novel00273,Cla007369
GO:0005048	signal sequence binding	molecular_function	0.1144	0.78098	4	2218	13	15506	Cla007370,Cla010537,Cla007369,Novel01030
GO:0042277	peptide binding	molecular_function	0.1144	0.78098	4	2218	13	15506	Novel01030,Cla007369,Cla010537,Cla007370
GO:0000276	mitochondrial proton-transporting ATP synthase complex, coupling factor F(o)	cellular_component	0.11528	0.78536	7	2218	29	15506	Novel01098,Cla019834,Novel00471,Cla020816,Novel00965,Cla019971,Cla003005
GO:0009072	aromatic amino acid family metabolic process	biological_process	0.11539	0.78536	9	2218	40	15506	Cla005344,Cla016672,Cla016673,Cla004999,Cla014407,Cla013776,Cla016041,Cla013040,Novel00268
GO:0004252	serine-type endopeptidase activity	molecular_function	0.116	0.78833	21	2218	121	15506	Cla012972,Cla009630,Cla019571,Cla023002,Cla004950,Cla012201,Cla004522,Cla011480,Cla014625,Cla019919,Cla011138,Cla006199,Cla001146,Novel00643,Cla010405,Cla009889,Cla018552,Cla002379,Cla007407,Cla013617,Cla004745
GO:0005666	DNA-directed RNA polymerase III complex	cellular_component	0.11666	0.79157	4	2218	13	15506	Cla021209,Cla017037,Cla014389,Cla008341
GO:0033655	host cell cytoplasm part	cellular_component	0.117	0.7927	2	2218	5	15506	Cla019444,Cla016001
GO:0052736	beta-glucanase activity	molecular_function	0.11776	0.79326	2	2218	5	15506	Cla016465,Cla023166
GO:0052861	glucan endo-1,3-beta-glucanase activity, C-3 substituted reducing group	molecular_function	0.11776	0.79326	2	2218	5	15506	Cla023166,Cla016465
GO:0052862	glucan endo-1,4-beta-glucanase activity, C-3 substituted reducing group	molecular_function	0.11776	0.79326	2	2218	5	15506	Cla016465,Cla023166
GO:0033177	proton-transporting two-sector ATPase complex, proton-transporting domain	cellular_component	0.11784	0.79326	23	2218	121	15506	Cla023166,Cla015019,Cla019529,Cla022333,Novel00965,Cla019297,Cla019797,Cla007613,Cla020164,Novel01304,Cla016840,Novel00471,Cla014389,Cla022440,Cla019834,Cla003644,Cla002271,Cla020816,Cla019971,Cla003005,Cla022292,Novel01098,Cla014100
GO:0050660	flavin adenine dinucleotide binding	molecular_function	0.11798	0.79326	28	2218	158	15506	Cla018407,Cla004245,Cla002517,Cla023248,Cla011810,Cla020476,Cla005671,Cla020214,Cla003751,Cla006886,Cla014518,Cla018438,Cla019109,Cla004999,Cla017988,Cla022293,Cla021430,Cla001251,Cla009256,Cla017273,Cla002818,Cla018002,Cla005283,Cla009847,Cla011132,Cla010898,Cla006885,Cla016840
GO:0000096	sulfur amino acid metabolic process	biological_process	0.12103	0.81258	5	2218	19	15506	Cla017149,Cla010611,Cla008324,Cla017148,Cla002903
GO:0006897	endocytosis	biological_process	0.1215	0.8145	5	2218	19	15506	Cla005923,Cla012739,Cla019797,Cla013730,Cla016663
GO:0030243	cellulose metabolic process	biological_process	0.12174	0.81488	9	2218	45	15506	Cla012972,Cla018547,Cla017383,Cla012973,Cla016671,Cla017384,Cla003320,Cla008465,Cla004473
GO:0034755	iron ion transmembrane transport	biological_process	0.12234	0.81527	2	2218	5	15506	Cla011094,Cla019977
GO:0030955	potassium ion binding	molecular_function	0.12235	0.81527	5	2218	19	15506	Cla004216,Cla022882,Cla018362,Cla018361,Cla003122
GO:0031420	alkali metal ion binding	molecular_function	0.12235	0.81527	5	2218	19	15506	Cla022882,Cla004216,Cla003122,Cla018361,Cla018362
GO:0005262	calcium channel activity	molecular_function	0.12285	0.81743	6	2218	24	15506	Cla014150,Cla021209,Cla017037,Cla014389,Cla008341,Cla010562
GO:0005509	calcium ion binding	molecular_function	0.12544	0.83167	41	2218	238	15506	Cla010961,Cla022563,Cla002648,Cla018056,Cla004381,Cla005909,Cla006954,Cla011409,Cla008332,Cla009769,Cla017877,Cla012742,Cla005744,Cla019269,Cla002291,Cla004698,Cla004703,Cla020469,Cla013188,Cla004386,Cla020164,Cla009077,Cla001094,Cla001954,Cla010171,Cla009630,Cla006838,Cla014375,Cla007831,Cla016110,Cla003303,Cla007837,Cla004704,Cla019885,Cla011357,Cla022278,Cla000205,Cla015233,Cla007424,Cla009948…
GO:0016703	oxidoreductase activity, acting on single donors with incorporation of molecular oxygen, incorporation of one atom of oxygen (internal monooxygenases or internal mixed function oxidases)	molecular_function	0.12551	0.83167	5	2218	19	15506	Cla001857,Cla017988,Cla009782,Cla017273,Cla011099
GO:0017053	transcriptional repressor complex	cellular_component	0.12572	0.83167	3	2218	9	15506	Cla023189,Cla000786,Cla017238
GO:0006812	cation transport	biological_process	0.12574	0.83167	101	2218	637	15506	Cla018195,Cla019444,Cla012011,Cla003774,Novel00404,Cla013992,Cla014100,Cla009157,Cla003644,Cla014389,Cla020816,Cla017050,Cla006331,Cla022628,Cla009747,Cla001157,Cla009946,Cla008210,Cla015019,Cla022333,Cla008358,Novel01194,Cla011267,Novel00965,Cla019612,Cla019644,Cla013374,Cla021327,Cla020293,Cla014452,Cla010071,Cla022440,Cla019834,Cla021209,Cla020249,Cla011094,Cla020476,Cla017061,Cla019797,Cla010…
GO:0016776	phosphotransferase activity, phosphate group as acceptor	molecular_function	0.12602	0.83232	4	2218	13	15506	Cla004490,Cla004881,Cla001468,Cla019316
GO:0044271	cellular nitrogen compound biosynthetic process	biological_process	0.12791	0.83718	387	2218	2553	15506	Cla011721,Cla009256,Cla012214,Cla015276,Cla020737,Cla005985,Cla011083,Cla020278,Cla021375,Cla020469,Cla017037,Cla014216,Cla008396,Cla017411,Cla002033,Cla023235,Cla018081,Cla010217,Cla008195,Novel00411,Cla017734,Cla023167,Novel00965,Cla012547,Cla019341,Cla019293,Cla010331,Cla014275,Cla014766,Cla006594,Cla015515,Cla019068,Cla019834,Cla003456,Cla021113,Cla019021,Cla011177,Cla011487,Cla020078,Cla0189…
GO:0016814	hydrolase activity, acting on carbon-nitrogen (but not peptide) bonds, in cyclic amidines	molecular_function	0.12821	0.83718	4	2218	14	15506	Cla005853,Novel01117,Cla023338,Cla001216
GO:0042301	phosphate ion binding	molecular_function	0.12853	0.83718	2	2218	5	15506	Cla001954,Cla003429
GO:0042559	pteridine-containing compound biosynthetic process	biological_process	0.12869	0.83718	7	2218	29	15506	Cla003989,Cla021251,Cla016386,Cla009745,Cla004284,Cla014068,Cla010547
GO:0007005	mitochondrion organization	biological_process	0.12874	0.83718	13	2218	64	15506	Novel00933,Cla021734,Cla018895,Cla003667,Cla011011,Cla008887,Cla000667,Cla014736,Cla004074,Cla013730,Cla000813,Cla022686,Cla010745
GO:0007160	cell-matrix adhesion	biological_process	0.12884	0.83718	1	2218	1	15506	Cla018153
GO:0006626	protein targeting to mitochondrion	biological_process	0.12886	0.83718	6	2218	25	15506	Cla003667,Cla018895,Cla022686,Cla011011,Cla008887,Cla004074
GO:0070585	protein localization to mitochondrion	biological_process	0.12886	0.83718	6	2218	25	15506	Cla022686,Cla018895,Cla003667,Cla004074,Cla008887,Cla011011
GO:0072655	establishment of protein localization to mitochondrion	biological_process	0.12886	0.83718	6	2218	25	15506	Cla022686,Cla018895,Cla003667,Cla004074,Cla011011,Cla008887
GO:0000097	sulfur amino acid biosynthetic process	biological_process	0.12893	0.83718	3	2218	9	15506	Cla017148,Cla002903,Cla017149
GO:0070887	cellular response to chemical stimulus	biological_process	0.12914	0.83718	5	2218	19	15506	Cla011936,Cla018210,Cla010171,Cla019293,Cla013527
GO:0009916	alternative oxidase activity	molecular_function	0.12918	0.83718	2	2218	5	15506	Cla004584,Novel00121
GO:0004140	dephospho-CoA kinase activity	molecular_function	0.12998	0.83718	3	2218	9	15506	Cla007102,Cla019814,Cla008501
GO:0004057	arginyltransferase activity	molecular_function	0.13049	0.83718	1	2218	1	15506	Cla006584
GO:0016598	protein arginylation	biological_process	0.13049	0.83718	1	2218	1	15506	Cla006584
GO:0005217	intracellular ligand-gated ion channel activity	molecular_function	0.13075	0.83718	5	2218	19	15506	Cla017037,Cla021209,Cla008341,Cla014389,Cla014150
GO:0005218	intracellular ligand-gated calcium channel activity	molecular_function	0.13075	0.83718	5	2218	19	15506	Cla014150,Cla021209,Cla017037,Cla008341,Cla014389
GO:0005219	ryanodine-sensitive calcium-release channel activity	molecular_function	0.13075	0.83718	5	2218	19	15506	Cla017037,Cla021209,Cla008341,Cla014389,Cla014150
GO:0015278	calcium-release channel activity	molecular_function	0.13075	0.83718	5	2218	19	15506	Cla008341,Cla014389,Cla017037,Cla021209,Cla014150
GO:0000314	organellar small ribosomal subunit	cellular_component	0.13089	0.83718	3	2218	9	15506	Cla021413,Novel00643,Cla023068
GO:0005763	mitochondrial small ribosomal subunit	cellular_component	0.13089	0.83718	3	2218	9	15506	Novel00643,Cla023068,Cla021413
GO:0015935	small ribosomal subunit	cellular_component	0.13089	0.83718	3	2218	9	15506	Cla021413,Cla023068,Novel00643
GO:0071806	protein transmembrane transport	biological_process	0.13206	0.84345	7	2218	31	15506	Cla004074,Cla011011,Cla008887,Novel01282,Cla018895,Cla022686,Cla003667
GO:0015370	solute:sodium symporter activity	molecular_function	0.13294	0.84782	2	2218	5	15506	Cla019527,Cla015484
GO:0007600	sensory perception	biological_process	0.13435	0.8532	3	2218	10	15506	Cla015498,Cla020286,Cla006317
GO:0007606	sensory perception of chemical stimulus	biological_process	0.13435	0.8532	3	2218	10	15506	Cla020286,Cla015498,Cla006317
GO:0050877	neurological system process	biological_process	0.13435	0.8532	3	2218	10	15506	Cla006317,Cla020286,Cla015498
GO:0004611	phosphoenolpyruvate carboxykinase activity	molecular_function	0.13504	0.85479	3	2218	10	15506	Cla000142,Cla002312,Cla023084
GO:0005996	monosaccharide metabolic process	biological_process	0.13515	0.85479	12	2218	60	15506	Cla008834,Cla022170,Cla023084,Cla010079,Cla021208,Cla012154,Cla000798,Cla000612,Cla013639,Cla019106,Cla022499,Cla016115
GO:0034061	DNA polymerase activity	molecular_function	0.13568	0.85479	17	2218	91	15506	Cla019255,Cla017742,Cla003575,Cla008066,Cla003005,Cla021949,Cla003084,Cla001468,Novel01240,Cla007619,Cla014303,Cla016385,Cla008396,Cla002582,Cla008676,Cla008341,Cla015001
GO:0005750	mitochondrial respiratory chain complex III	cellular_component	0.13613	0.85479	3	2218	9	15506	Cla011555,Cla020955,Cla017692
GO:0006122	mitochondrial electron transport, ubiquinol to cytochrome c	biological_process	0.13613	0.85479	3	2218	9	15506	Cla017692,Cla020955,Cla011555
GO:0045275	respiratory chain complex III	cellular_component	0.13613	0.85479	3	2218	9	15506	Cla011555,Cla020955,Cla017692
GO:0004474	malate synthase activity	molecular_function	0.13633	0.85479	1	2218	1	15506	Cla002601
GO:0006097	glyoxylate cycle	biological_process	0.13633	0.85479	1	2218	1	15506	Cla002601
GO:0046487	glyoxylate metabolic process	biological_process	0.13633	0.85479	1	2218	1	15506	Cla002601
GO:0051260	protein homooligomerization	biological_process	0.13676	0.85629	3	2218	10	15506	Cla012117,Cla018730,Cla018293
GO:0016151	nickel cation binding	molecular_function	0.1373	0.85648	8	2218	35	15506	Cla008387,Cla003586,Cla008376,Cla004490,Cla005499,Cla003999,Novel01142,Cla019316
GO:0005388	calcium-transporting ATPase activity	molecular_function	0.13733	0.85648	1	2218	1	15506	Cla005619
GO:0072657	protein localization to membrane	biological_process	0.1375	0.85648	15	2218	79	15506	Cla021256,Cla016465,Cla022698,Cla022724,Cla007370,Cla005583,Cla004074,Cla019070,Cla020551,Novel00643,Cla008887,Cla017560,Cla007369,Cla022686,Cla023201
GO:0030430	host cell cytoplasm	cellular_component	0.13786	0.85648	4	2218	15	15506	Cla019444,Cla016001,Cla003947,Cla011429
GO:0071771	aldehyde decarbonylase activity	molecular_function	0.13816	0.85648	1	2218	1	15506	Cla007656
GO:0008810	cellulase activity	molecular_function	0.13824	0.85648	2	2218	5	15506	Cla019462,Cla016671
GO:0004571	mannosyl-oligosaccharide 1,2-alpha-mannosidase activity	molecular_function	0.13847	0.85648	2	2218	5	15506	Cla009769,Cla007837
GO:0015924	mannosyl-oligosaccharide mannosidase activity	molecular_function	0.13847	0.85648	2	2218	5	15506	Cla007837,Cla009769
GO:0004799	thymidylate synthase activity	molecular_function	0.13857	0.85648	1	2218	1	15506	Cla016577
GO:0017150	tRNA dihydrouridine synthase activity	molecular_function	0.13871	0.85648	3	2218	9	15506	Cla017988,Cla018438,Cla017273
GO:0016874	ligase activity	molecular_function	0.13946	0.85654	34	2218	205	15506	Cla017851,Cla007788,Cla019188,Cla021970,Cla008113,Cla007622,Cla023103,Cla010694,Cla017814,Cla020469,Cla021742,Cla005137,Cla013382,Cla008058,Cla002631,Cla021991,Cla020930,Cla005637,Cla008703,Cla004685,Cla001502,Cla017270,Cla011995,Cla001455,Cla018129,Novel01170,Cla006584,Cla015725,Cla016761,Cla005471,Cla006791,Cla015666,Cla005050,Cla021327
GO:0006261	DNA-dependent DNA replication	biological_process	0.14	0.85654	14	2218	71	15506	Cla011341,Cla021436,Cla007696,Cla008341,Cla008676,Cla012411,Cla014239,Cla017202,Cla017734,Cla021209,Cla017037,Cla001518,Cla004029,Cla014389
GO:0008535	respiratory chain complex IV assembly	biological_process	0.14032	0.85654	2	2218	5	15506	Cla000813,Novel00933
GO:0033617	mitochondrial respiratory chain complex IV assembly	biological_process	0.14032	0.85654	2	2218	5	15506	Novel00933,Cla000813
GO:0097034	mitochondrial respiratory chain complex IV biogenesis	biological_process	0.14032	0.85654	2	2218	5	15506	Novel00933,Cla000813
GO:0004817	cysteine-tRNA ligase activity	molecular_function	0.14071	0.85654	2	2218	5	15506	Cla016761,Cla008113
GO:0006423	cysteinyl-tRNA aminoacylation	biological_process	0.14071	0.85654	2	2218	5	15506	Cla016761,Cla008113
GO:0005768	endosome	cellular_component	0.14083	0.85654	2	2218	5	15506	Cla008692,Cla011936
GO:0044440	endosomal part	cellular_component	0.14083	0.85654	2	2218	5	15506	Cla008692,Cla011936
GO:0000049	tRNA binding	molecular_function	0.14095	0.85654	5	2218	20	15506	Cla001456,Cla020930,Cla005637,Cla020915,Cla001457
GO:0044743	intracellular protein transmembrane import	biological_process	0.14103	0.85654	6	2218	26	15506	Cla004074,Cla008887,Cla011011,Cla003667,Cla018895,Cla022686
GO:0065002	intracellular protein transmembrane transport	biological_process	0.14103	0.85654	6	2218	26	15506	Cla004074,Cla011011,Cla008887,Cla018895,Cla022686,Cla003667
GO:0050151	oleate hydratase activity	molecular_function	0.14133	0.85719	2	2218	5	15506	Cla011810,Cla010898
GO:0060589	nucleoside-triphosphatase regulator activity	molecular_function	0.14174	0.85793	17	2218	90	15506	Cla011084,Cla012065,Cla018195,Cla008139,Cla008140,Cla005340,Cla003885,Cla001829,Cla011536,Cla002891,Cla009828,Cla022107,Cla016201,Cla016690,Cla021499,Cla013688,Cla018253
GO:0003723	RNA binding	molecular_function	0.14183	0.85793	98	2218	628	15506	Cla003084,Cla009256,Cla002793,Cla023341,Cla006318,Cla022077,Cla023201,Cla008555,Cla003535,Cla017037,Cla013653,Cla006812,Cla010217,Cla021115,Cla014216,Cla012284,Cla013147,Cla021016,Cla021732,Cla001487,Cla020266,Cla020787,Cla022225,Cla005583,Cla001216,Cla019191,Cla001456,Cla004874,Cla014044,Cla012278,Cla005343,Cla015553,Cla007828,Cla005201,Cla022928,Cla021684,Cla011367,Cla008817,Cla019797,Cla019299…
GO:0060089	molecular transducer activity	molecular_function	0.1423	0.85812	41	2218	253	15506	Cla015527,Cla005491,Cla009747,Cla020286,Cla014732,Cla018469,Cla010285,Cla019958,Novel00411,Cla004222,Cla010079,Cla018794,Cla020056,Cla007745,Novel00518,Cla017615,Cla007461,Cla009157,Cla022844,Cla010793,Cla004473,Cla019797,Cla013455,Cla001020,Novel00137,Cla010171,Cla015498,Cla012739,Cla000798,Cla009259,Cla003303,Cla016926,Cla021293,Cla019293,Cla012278,Cla012575,Cla010071,Cla006317,Cla007073,Cla015…
GO:0004366	glycerol-3-phosphate O-acyltransferase activity	molecular_function	0.14324	0.85812	1	2218	1	15506	Cla016244
GO:0009292	genetic transfer	biological_process	0.14335	0.85812	2	2218	5	15506	Cla006353,Cla020286
GO:0034599	cellular response to oxidative stress	biological_process	0.14349	0.85812	2	2218	5	15506	Cla018210,Cla013527
GO:0008236	serine-type peptidase activity	molecular_function	0.14375	0.85812	40	2218	241	15506	Cla022306,Cla014138,Cla020565,Cla016961,Cla004745,Cla019834,Cla022235,Cla009889,Cla002379,Cla008838,Cla018552,Novel00643,Cla006199,Cla004522,Cla020208,Cla009630,Cla004950,Cla012972,Cla013045,Cla013617,Cla007407,Cla010405,Cla011178,Cla020875,Cla006489,Cla007643,Cla016443,Cla001146,Cla018433,Cla011138,Cla004795,Cla016960,Cla014625,Cla019919,Cla011480,Cla016661,Cla023002,Cla019571,Cla012201,Cla003943
GO:0017171	serine hydrolase activity	molecular_function	0.14375	0.85812	40	2218	241	15506	Novel00643,Cla018552,Cla002379,Cla008838,Cla009889,Cla019834,Cla022235,Cla016961,Cla020565,Cla004745,Cla014138,Cla022306,Cla012972,Cla013045,Cla009630,Cla004950,Cla020208,Cla004522,Cla006199,Cla007643,Cla010405,Cla011178,Cla020875,Cla006489,Cla007407,Cla013617,Cla019571,Cla023002,Cla012201,Cla003943,Cla016661,Cla011480,Cla016960,Cla014625,Cla019919,Cla011138,Cla004795,Cla016443,Cla001146,Cla018433
GO:0006544	glycine metabolic process	biological_process	0.14399	0.85812	2	2218	5	15506	Cla021934,Cla016577
GO:0070402	NADPH binding	molecular_function	0.14405	0.85812	1	2218	1	15506	Cla019193
GO:0004784	superoxide dismutase activity	molecular_function	0.14442	0.85812	2	2218	5	15506	Cla021357,Cla010691
GO:0016721	oxidoreductase activity, acting on superoxide radicals as acceptor	molecular_function	0.14442	0.85812	2	2218	5	15506	Cla021357,Cla010691
GO:0017176	phosphatidylinositol N-acetylglucosaminyltransferase activity	molecular_function	0.14475	0.85812	2	2218	5	15506	Cla006940,Cla008975
GO:1901068	guanosine-containing compound metabolic process	biological_process	0.14537	0.85812	3	2218	10	15506	Cla017390,Cla004819,Cla012575
GO:0003726	double-stranded RNA adenosine deaminase activity	molecular_function	0.14599	0.85812	1	2218	1	15506	Cla005853
GO:0043570	maintenance of DNA repeat elements	biological_process	0.14657	0.85812	1	2218	1	15506	Novel00643
GO:0043571	maintenance of CRISPR repeat elements	biological_process	0.14657	0.85812	1	2218	1	15506	Novel00643
GO:0070069	cytochrome complex	cellular_component	0.14678	0.85812	5	2218	20	15506	Cla017692,Cla013485,Cla020955,Cla011555,Cla001181
GO:0005741	mitochondrial outer membrane	cellular_component	0.14701	0.85812	17	2218	89	15506	Cla018895,Novel00688,Cla021734,Cla021891,Cla010292,Cla004074,Cla009207,Cla000667,Cla008887,Cla003667,Cla020053,Cla009215,Cla010745,Cla022686,Cla013730,Cla011011,Cla007619
GO:0031968	organelle outer membrane	cellular_component	0.14701	0.85812	17	2218	89	15506	Cla018895,Novel00688,Cla021734,Cla021891,Cla010292,Cla004074,Cla000667,Cla008887,Cla009207,Cla003667,Cla020053,Cla009215,Cla022686,Cla010745,Cla013730,Cla011011,Cla007619
GO:0019236	response to pheromone	biological_process	0.14868	0.85812	2	2218	5	15506	Cla005612,Cla015534
GO:0060590	ATPase regulator activity	molecular_function	0.14913	0.85812	9	2218	43	15506	Cla013688,Cla018195,Cla022107,Cla002891,Cla012065,Cla011084,Cla001829,Cla003885,Cla005340
GO:0006027	glycosaminoglycan catabolic process	biological_process	0.1492	0.85812	1	2218	1	15506	Cla015515
GO:0009253	peptidoglycan catabolic process	biological_process	0.1492	0.85812	1	2218	1	15506	Cla015515
GO:0007186	G-protein coupled receptor signaling pathway	biological_process	0.14937	0.85812	22	2218	126	15506	Cla000798,Cla010079,Cla015534,Cla019958,Cla018576,Cla004222,Cla005612,Cla020286,Cla010285,Cla018469,Cla022844,Cla015527,Cla019217,Cla007073,Cla007461,Cla009157,Novel00518,Cla012575,Cla010071,Cla009259,Cla022043,Cla012278
GO:0009555	pollen development	biological_process	0.15068	0.85812	1	2218	1	15506	Cla008486
GO:0048229	gametophyte development	biological_process	0.15068	0.85812	1	2218	1	15506	Cla008486
GO:0005753	mitochondrial proton-transporting ATP synthase complex	cellular_component	0.15102	0.85812	8	2218	37	15506	Cla019971,Cla003005,Novel01098,Cla015497,Novel00471,Cla019834,Cla020816,Novel00965
GO:0009186	deoxyribonucleoside diphosphate metabolic process	biological_process	0.15211	0.85812	1	2218	1	15506	Cla003218
GO:0016514	SWI/SNF complex	cellular_component	0.15242	0.85812	1	2218	1	15506	Cla001643
GO:0051499	D-aminoacyl-tRNA deacylase activity	molecular_function	0.15257	0.85812	1	2218	1	15506	Cla022043
GO:0004859	phospholipase inhibitor activity	molecular_function	0.1526	0.85812	1	2218	1	15506	Cla013875
GO:0055102	lipase inhibitor activity	molecular_function	0.1526	0.85812	1	2218	1	15506	Cla013875
GO:0009264	deoxyribonucleotide catabolic process	biological_process	0.15268	0.85812	1	2218	1	15506	Cla011125
GO:0009396	folic acid-containing compound biosynthetic process	biological_process	0.15324	0.85812	6	2218	25	15506	Cla021251,Cla003989,Cla010547,Cla014068,Cla004284,Cla016386
GO:0007339	binding of sperm to zona pellucida	biological_process	0.15367	0.85812	1	2218	1	15506	Cla018594
GO:0009988	cell-cell recognition	biological_process	0.15367	0.85812	1	2218	1	15506	Cla018594
GO:0035036	sperm-egg recognition	biological_process	0.15367	0.85812	1	2218	1	15506	Cla018594
GO:0004579	dolichyl-diphosphooligosaccharide-protein glycotransferase activity	molecular_function	0.15411	0.85812	2	2218	5	15506	Cla008837,Cla020558
GO:0046422	violaxanthin de-epoxidase activity	molecular_function	0.15426	0.85812	1	2218	1	15506	Cla000667
GO:0043015	gamma-tubulin binding	molecular_function	0.15447	0.85812	2	2218	5	15506	Cla013730,Cla014028
GO:0035792	other organism postsynaptic membrane	cellular_component	0.15458	0.85812	1	2218	1	15506	Novel00933
GO:0009349	riboflavin synthase complex	cellular_component	0.1549	0.85812	1	2218	1	15506	Cla022008
GO:0043683	type IV pilus biogenesis	biological_process	0.15547	0.85812	1	2218	1	15506	Cla015809
GO:0004112	cyclic-nucleotide phosphodiesterase activity	molecular_function	0.15555	0.85812	2	2218	5	15506	Cla003262,Cla009242
GO:0043547	positive regulation of GTPase activity	biological_process	0.15577	0.85812	1	2218	1	15506	Cla021916
GO:0051345	positive regulation of hydrolase activity	biological_process	0.15577	0.85812	1	2218	1	15506	Cla021916
GO:0090630	activation of GTPase activity	biological_process	0.15577	0.85812	1	2218	1	15506	Cla021916
GO:0006895	Golgi to endosome transport	biological_process	0.15587	0.85812	1	2218	1	15506	Cla009901
GO:0006903	vesicle targeting	biological_process	0.15587	0.85812	1	2218	1	15506	Cla009901
GO:0007162	negative regulation of cell adhesion	biological_process	0.15587	0.85812	1	2218	1	15506	Cla009901
GO:0010721	negative regulation of cell development	biological_process	0.15587	0.85812	1	2218	1	15506	Cla009901
GO:0010769	regulation of cell morphogenesis involved in differentiation	biological_process	0.15587	0.85812	1	2218	1	15506	Cla009901
GO:0010771	negative regulation of cell morphogenesis involved in differentiation	biological_process	0.15587	0.85812	1	2218	1	15506	Cla009901
GO:0010810	regulation of cell-substrate adhesion	biological_process	0.15587	0.85812	1	2218	1	15506	Cla009901
GO:0010812	negative regulation of cell-substrate adhesion	biological_process	0.15587	0.85812	1	2218	1	15506	Cla009901
GO:0034315	regulation of Arp2/3 complex-mediated actin nucleation	biological_process	0.15587	0.85812	1	2218	1	15506	Cla009901
GO:0034446	substrate adhesion-dependent cell spreading	biological_process	0.15587	0.85812	1	2218	1	15506	Cla009901
GO:0035650	AP-1 adaptor complex binding	molecular_function	0.15587	0.85812	1	2218	1	15506	Cla009901
GO:0040013	negative regulation of locomotion	biological_process	0.15587	0.85812	1	2218	1	15506	Cla009901
GO:0045596	negative regulation of cell differentiation	biological_process	0.15587	0.85812	1	2218	1	15506	Cla009901
GO:0048199	vesicle targeting, to, from or within Golgi	biological_process	0.15587	0.85812	1	2218	1	15506	Cla009901
GO:0048203	vesicle targeting, trans-Golgi to endosome	biological_process	0.15587	0.85812	1	2218	1	15506	Cla009901
GO:0051093	negative regulation of developmental process	biological_process	0.15587	0.85812	1	2218	1	15506	Cla009901
GO:0051125	regulation of actin nucleation	biological_process	0.15587	0.85812	1	2218	1	15506	Cla009901
GO:0051271	negative regulation of cellular component movement	biological_process	0.15587	0.85812	1	2218	1	15506	Cla009901
GO:0060284	regulation of cell development	biological_process	0.15587	0.85812	1	2218	1	15506	Cla009901
GO:1900024	regulation of substrate adhesion-dependent cell spreading	biological_process	0.15587	0.85812	1	2218	1	15506	Cla009901
GO:1900025	negative regulation of substrate adhesion-dependent cell spreading	biological_process	0.15587	0.85812	1	2218	1	15506	Cla009901
GO:2000146	negative regulation of cell motility	biological_process	0.15587	0.85812	1	2218	1	15506	Cla009901
GO:0032922	circadian regulation of gene expression	biological_process	0.15591	0.85812	1	2218	1	15506	Cla014766
GO:0005751	mitochondrial respiratory chain complex IV	cellular_component	0.15591	0.85812	1	2218	1	15506	Cla001181
GO:0045277	respiratory chain complex IV	cellular_component	0.15591	0.85812	1	2218	1	15506	Cla001181
GO:0019670	anaerobic glutamate catabolic process	biological_process	0.15592	0.85812	1	2218	1	15506	Cla005589
GO:0050097	methylaspartate mutase activity	molecular_function	0.15592	0.85812	1	2218	1	15506	Cla005589
GO:0004970	ionotropic glutamate receptor activity	molecular_function	0.15683	0.86104	6	2218	30	15506	Cla018794,Cla007674,Cla004473,Cla009747,Cla016926,Cla003303
GO:0008066	glutamate receptor activity	molecular_function	0.15683	0.86104	6	2218	30	15506	Cla016926,Cla003303,Cla018794,Cla007674,Cla004473,Cla009747
GO:0045261	proton-transporting ATP synthase complex, catalytic core F(1)	cellular_component	0.15742	0.8632	4	2218	15	15506	Cla021378,Cla019380,Cla015497,Cla014452
GO:0008373	sialyltransferase activity	molecular_function	0.15778	0.8638	2	2218	5	15506	Cla008977,Cla008978
GO:1901362	organic cyclic compound biosynthetic process	biological_process	0.15792	0.8638	324	2218	2132	15506	Cla009745,Cla000813,Cla003999,Novel00471,Cla008809,Cla008294,Cla004245,Cla014433,Cla022076,Cla021378,Cla006791,Cla015804,Cla017266,Cla007837,Cla016822,Cla003005,Cla019971,Cla022670,Cla005450,Cla019316,Cla009670,Cla013766,Cla010875,Cla009557,Cla007434,Cla015498,Cla007817,Cla019304,Cla006484,Cla021592,Cla020816,Cla008066,Cla003575,Cla003644,Cla004714,Cla003774,Cla021251,Cla014068,Cla008210,Cla00070…
GO:0006270	DNA replication initiation	biological_process	0.15902	0.86758	11	2218	54	15506	Cla011341,Cla007696,Cla008676,Cla008341,Cla014239,Cla017202,Cla017734,Cla017037,Cla021209,Cla004029,Cla014389
GO:0043234	protein complex	cellular_component	0.1598	0.86758	216	2218	1422	15506	Cla014389,Cla008555,Cla016851,Cla021609,Cla001643,Cla022476,Novel00177,Cla007727,Cla004819,Cla018895,Cla003084,Cla007696,Cla020955,Cla014100,Cla013992,Cla000805,Cla022977,Cla013263,Cla015019,Cla022333,Novel00204,Cla009467,Cla013328,Cla007265,Cla023286,Cla001476,Cla010693,Cla006812,Cla002332,Cla020337,Novel00643,Cla005247,Cla022440,Cla004613,Cla023217,Cla015537,Cla021209,Cla017692,Cla004704,Cla003…
GO:0006892	post-Golgi vesicle-mediated transport	biological_process	0.16029	0.86758	2	2218	5	15506	Cla009901,Cla016465
GO:0033993	response to lipid	biological_process	0.16036	0.86758	2	2218	5	15506	Cla019293,Cla010171
GO:0043401	steroid hormone mediated signaling pathway	biological_process	0.16036	0.86758	2	2218	5	15506	Cla019293,Cla010171
GO:0048545	response to steroid hormone	biological_process	0.16036	0.86758	2	2218	5	15506	Cla010171,Cla019293
GO:0071383	cellular response to steroid hormone stimulus	biological_process	0.16036	0.86758	2	2218	5	15506	Cla019293,Cla010171
GO:0071396	cellular response to lipid	biological_process	0.16036	0.86758	2	2218	5	15506	Cla019293,Cla010171
GO:0071407	cellular response to organic cyclic compound	biological_process	0.16036	0.86758	2	2218	5	15506	Cla019293,Cla010171
GO:0019048	modulation by virus of host morphology or physiology	biological_process	0.16058	0.86771	10	2218	49	15506	Cla004918,Cla010875,Cla010405,Cla009630,Cla016176,Cla019571,Cla010580,Cla017615,Cla019444,Cla007501
GO:0006353	DNA-templated transcription, termination	biological_process	0.16133	0.8682	3	2218	10	15506	Cla005974,Cla019653,Cla009256
GO:0004721	phosphoprotein phosphatase activity	molecular_function	0.16144	0.8682	8	2218	38	15506	Cla010030,Cla011058,Cla013973,Cla009377,Cla013695,Cla018666,Cla010377,Novel00689
GO:0016759	cellulose synthase activity	molecular_function	0.16214	0.8682	7	2218	36	15506	Cla012972,Cla017384,Cla017383,Cla003320,Cla008465,Cla004473,Cla012973
GO:0016760	cellulose synthase (UDP-forming) activity	molecular_function	0.16214	0.8682	7	2218	36	15506	Cla012972,Cla017383,Cla017384,Cla008465,Cla003320,Cla004473,Cla012973
GO:0016929	SUMO-specific protease activity	molecular_function	0.16242	0.8682	2	2218	5	15506	Cla018253,Cla015597
GO:0032183	SUMO binding	molecular_function	0.16242	0.8682	2	2218	5	15506	Cla018253,Cla015597
GO:0070122	isopeptidase activity	molecular_function	0.16242	0.8682	2	2218	5	15506	Cla018253,Cla015597
GO:0070138	ubiquitin-like protein-specific isopeptidase activity	molecular_function	0.16242	0.8682	2	2218	5	15506	Cla015597,Cla018253
GO:0070140	SUMO-specific isopeptidase activity	molecular_function	0.16242	0.8682	2	2218	5	15506	Cla018253,Cla015597
GO:0098800	inner mitochondrial membrane protein complex	cellular_component	0.16283	0.8686	12	2218	61	15506	Novel00471,Cla015497,Cla019834,Cla001181,Cla011555,Novel00965,Cla020816,Cla019971,Cla017692,Cla003005,Novel01098,Cla020955
GO:0051087	chaperone binding	molecular_function	0.16289	0.8686	8	2218	37	15506	Cla010875,Cla018084,Cla009009,Cla002891,Cla012065,Cla005340,Cla020286,Cla003885
GO:0030554	adenyl nucleotide binding	molecular_function	0.16379	0.87047	269	2218	1917	15506	Cla023341,Cla007745,Cla011970,Cla013457,Cla005137,Cla016330,Cla003084,Cla001168,Cla001487,Cla003498,Cla005119,Cla014854,Cla007788,Novel00792,Cla005201,Cla015802,Cla018048,Cla021357,Cla002353,Cla011995,Cla012038,Cla017981,Novel00793,Cla010704,Cla016761,Cla015615,Novel01170,Cla009910,Cla018570,Cla013415,Cla013712,Novel00121,Cla015315,Cla019814,Cla006032,Cla021071,Cla004160,Cla021514,Cla005204,Cla01…
GO:0008121	ubiquinol-cytochrome-c reductase activity	molecular_function	0.16402	0.87047	4	2218	15	15506	Cla005925,Cla005926,Cla009108,Cla019591
GO:0016681	oxidoreductase activity, acting on diphenols and related substances as donors, cytochrome as acceptor	molecular_function	0.16402	0.87047	4	2218	15	15506	Cla005926,Cla005925,Cla009108,Cla019591
GO:0005786	signal recognition particle, endoplasmic reticulum targeting	cellular_component	0.16467	0.87183	2	2218	5	15506	Cla007370,Cla007369
GO:0030942	endoplasmic reticulum signal peptide binding	molecular_function	0.16467	0.87183	2	2218	5	15506	Cla007370,Cla007369
GO:0032886	regulation of microtubule-based process	biological_process	0.16585	0.87334	5	2218	22	15506	Cla008037,Cla021046,Cla012513,Cla021734,Cla012454
GO:0070507	regulation of microtubule cytoskeleton organization	biological_process	0.16585	0.87334	5	2218	22	15506	Cla012454,Cla021734,Cla012513,Cla008037,Cla021046
GO:0008318	protein prenyltransferase activity	molecular_function	0.16593	0.87334	2	2218	6	15506	Cla005549,Cla022722
GO:0018342	protein prenylation	biological_process	0.16593	0.87334	2	2218	6	15506	Cla005549,Cla022722
GO:0097354	prenylation	biological_process	0.16593	0.87334	2	2218	6	15506	Cla005549,Cla022722
GO:0008982	protein-N(PI)-phosphohistidine-sugar phosphotransferase activity	molecular_function	0.16963	0.88993	3	2218	11	15506	Cla017037,Cla001092,Cla018314
GO:0008915	lipid-A-disaccharide synthase activity	molecular_function	0.16998	0.88993	2	2218	5	15506	Cla021407,Cla021734
GO:0005758	mitochondrial intermembrane space	cellular_component	0.17028	0.88993	2	2218	5	15506	Cla015466,Novel01194
GO:0016530	metallochaperone activity	molecular_function	0.17028	0.88993	2	2218	5	15506	Cla015466,Novel01194
GO:0016531	copper chaperone activity	molecular_function	0.17028	0.88993	2	2218	5	15506	Novel01194,Cla015466
GO:0031970	organelle envelope lumen	cellular_component	0.17028	0.88993	2	2218	5	15506	Novel01194,Cla015466
GO:0005096	GTPase activator activity	molecular_function	0.17052	0.89013	8	2218	38	15506	Cla008139,Cla018253,Cla016690,Cla021499,Cla009828,Cla016201,Cla011536,Cla008140
GO:0046148	pigment biosynthetic process	biological_process	0.17097	0.89144	19	2218	106	15506	Cla008210,Cla010547,Cla007434,Cla004284,Cla023248,Cla011810,Cla020476,Cla016861,Cla002033,Cla002517,Cla004245,Cla010898,Cla016840,Cla005283,Cla015621,Cla002818,Cla001251,Cla022670,Cla019109
GO:0009081	branched-chain amino acid metabolic process	biological_process	0.17173	0.89332	3	2218	11	15506	Novel00792,Cla016264,Cla018253
GO:0009082	branched-chain amino acid biosynthetic process	biological_process	0.17173	0.89332	3	2218	11	15506	Cla018253,Novel00792,Cla016264
GO:0042775	mitochondrial ATP synthesis coupled electron transport	biological_process	0.17377	0.90129	4	2218	15	15506	Cla009906,Cla017692,Cla020955,Cla011555
GO:0032324	molybdopterin cofactor biosynthetic process	biological_process	0.17387	0.90129	4	2218	16	15506	Cla015001,Cla002350,Cla011094,Cla021256
GO:0043545	molybdopterin cofactor metabolic process	biological_process	0.17387	0.90129	4	2218	16	15506	Cla015001,Cla002350,Cla021256,Cla011094
GO:0006839	mitochondrial transport	biological_process	0.17447	0.90328	6	2218	27	15506	Cla003667,Cla022686,Cla018895,Cla008887,Cla011011,Cla004074
GO:0016503	pheromone receptor activity	molecular_function	0.17466	0.90328	2	2218	6	15506	Novel00518,Cla012575
GO:0051188	cofactor biosynthetic process	biological_process	0.17559	0.90705	31	2218	181	15506	Cla002350,Cla007434,Cla020208,Cla007239,Cla016386,Cla004584,Cla008210,Cla014068,Cla010547,Cla015001,Cla020476,Cla016861,Cla021256,Cla004284,Cla011094,Cla004245,Cla002517,Cla006332,Cla014854,Cla007102,Cla002033,Cla003989,Cla019814,Cla009745,Cla022670,Cla017988,Cla008501,Cla001251,Cla021251,Cla005450,Cla007272
GO:0072509	divalent inorganic cation transmembrane transporter activity	molecular_function	0.17648	0.90957	21	2218	119	15506	Cla008341,Cla010562,Cla022628,Cla022844,Cla020249,Cla005619,Cla008897,Cla001020,Cla009946,Cla021405,Cla021367,Cla012011,Cla010071,Cla012810,Cla016137,Cla014389,Cla020867,Cla021209,Cla017037,Cla014150,Cla009157
GO:0016757	transferase activity, transferring glycosyl groups	molecular_function	0.17649	0.90957	74	2218	472	15506	Cla010205,Cla008465,Cla017383,Cla017769,Cla001469,Cla020743,Novel00903,Cla023286,Cla016027,Cla018849,Cla009592,Novel00689,Cla009165,Cla005994,Cla014904,Cla014428,Cla006379,Cla000974,Cla011828,Cla022185,Cla006940,Cla010796,Cla009889,Cla008978,Cla023274,Cla015692,Cla016531,Cla006271,Cla015604,Novel01170,Cla018595,Cla012631,Cla004918,Cla008975,Cla023275,Cla007689,Cla007664,Cla021734,Cla008977,Cla010…
GO:0022891	substrate-specific transmembrane transporter activity	molecular_function	0.17862	0.91948	113	2218	741	15506	Cla009157,Cla003221,Cla017037,Cla020816,Cla003334,Cla003644,Cla014389,Cla019444,Novel00404,Cla014100,Cla003774,Cla012011,Cla008210,Cla015019,Cla007212,Cla009946,Cla019612,Novel00965,Cla011267,Novel01194,Cla022333,Cla017050,Cla009747,Cla009108,Cla022628,Cla012411,Cla007674,Cla021209,Cla001092,Cla022440,Cla019834,Cla013374,Cla002221,Cla010071,Cla020293,Cla014452,Cla021250,Cla001020,Cla015484,Cla016…
GO:0042578	phosphoric ester hydrolase activity	molecular_function	0.1819	0.93489	31	2218	188	15506	Cla009242,Cla004220,Cla012918,Cla019056,Cla007828,Cla012154,Cla023201,Cla023341,Cla017877,Cla013695,Cla005570,Cla021357,Cla010030,Cla022337,Novel00689,Cla003623,Cla003276,Cla000876,Cla018314,Cla001888,Cla010377,Cla018918,Cla017808,Cla018666,Cla003262,Cla009377,Cla014354,Cla011125,Cla013973,Cla011058,Cla011367
GO:0016701	oxidoreductase activity, acting on single donors with incorporation of molecular oxygen	molecular_function	0.18203	0.93489	15	2218	83	15506	Cla017988,Cla009782,Cla001857,Cla008324,Cla021593,Cla020963,Cla010704,Cla017021,Cla022107,Cla017273,Novel00273,Cla002093,Cla011099,Cla005980,Cla012112
GO:0019083	viral transcription	biological_process	0.18428	0.94537	4	2218	17	15506	Cla003535,Cla002350,Cla018885,Cla021997
GO:0045263	proton-transporting ATP synthase complex, coupling factor F(o)	cellular_component	0.18458	0.94553	11	2218	55	15506	Cla003644,Cla019834,Cla022333,Novel00471,Cla020816,Novel00965,Cla020164,Cla016840,Novel01098,Cla019971,Cla003005
GO:0034655	nucleobase-containing compound catabolic process	biological_process	0.18474	0.94553	8	2218	40	15506	Cla010280,Cla018240,Cla010434,Cla003262,Cla000199,Cla018469,Cla011125,Cla014185
GO:0032559	adenyl ribonucleotide binding	molecular_function	0.1856	0.94886	265	2218	1898	15506	Cla008291,Cla013433,Novel01111,Cla012753,Cla017036,Cla019885,Cla007592,Cla013657,Cla016863,Cla012519,Cla017751,Cla007846,Cla015898,Cla009580,Cla011726,Cla014303,Cla013986,Cla008703,Cla017463,Cla001404,Cla008298,Cla004685,Cla019498,Cla007820,Cla020786,Cla005031,Cla008577,Cla004257,Novel00273,Cla016450,Cla023103,Cla011114,Cla009354,Cla015485,Cla010079,Cla004874,Cla005807,Cla018694,Cla005583,Cla0074…
GO:0016725	oxidoreductase activity, acting on CH or CH2 groups	molecular_function	0.18612	0.95044	3	2218	11	15506	Cla005033,Cla015963,Cla021037
GO:0005743	mitochondrial inner membrane	cellular_component	0.18658	0.95169	15	2218	81	15506	Cla003005,Cla017692,Cla019971,Cla020955,Novel01098,Cla018556,Cla006136,Cla009906,Cla020816,Novel00965,Cla011555,Cla001181,Cla019834,Cla015497,Novel00471
GO:0030244	cellulose biosynthetic process	biological_process	0.18707	0.95312	8	2218	43	15506	Cla017384,Cla008465,Cla003320,Cla004473,Cla012972,Cla017383,Cla018547,Cla012973
GO:2001070	starch binding	molecular_function	0.18797	0.95525	3	2218	12	15506	Cla015356,Cla013193,Cla019379
GO:0070972	protein localization to endoplasmic reticulum	biological_process	0.18809	0.95525	10	2218	52	15506	Cla010537,Cla007369,Cla023201,Cla019070,Cla020551,Cla007370,Novel01030,Cla005583,Cla021256,Cla022698
GO:0005524	ATP binding	molecular_function	0.18814	0.95525	262	2218	1876	15506	Cla018198,Cla008301,Cla006509,Cla006791,Cla006188,Cla005050,Cla007714,Cla003005,Cla006736,Cla009259,Cla007817,Cla009670,Cla003171,Cla021830,Cla016842,Cla020455,Cla020963,Cla008861,Cla014899,Cla013268,Cla019199,Cla006761,Cla007229,Cla010722,Cla012104,Cla014632,Cla021991,Cla012636,Cla018835,Cla008720,Cla008113,Cla010413,Cla018530,Cla001321,Cla002913,Cla014422,Cla021037,Cla000704,Cla023384,Cla007828…
GO:0051213	dioxygenase activity	molecular_function	0.18888	0.95793	13	2218	72	15506	Cla022107,Cla021593,Cla020963,Cla010704,Cla017021,Cla008324,Cla012112,Cla005980,Cla002093,Cla011870,Cla007369,Novel00273,Cla001775
GO:0016485	protein processing	biological_process	0.18962	0.95838	7	2218	33	15506	Cla022977,Cla005247,Cla009630,Cla010405,Cla019571,Cla019919,Cla013145
GO:0051604	protein maturation	biological_process	0.18962	0.95838	7	2218	33	15506	Cla013145,Cla010405,Cla009630,Cla019571,Cla019919,Cla022977,Cla005247
GO:0006576	cellular biogenic amine metabolic process	biological_process	0.18983	0.95838	12	2218	65	15506	Cla009259,Cla019021,Cla010704,Cla019645,Cla013433,Cla005603,Cla005375,Cla019958,Cla018314,Cla021016,Cla016041,Cla017808
GO:0044106	cellular amine metabolic process	biological_process	0.18983	0.95838	12	2218	65	15506	Cla009259,Cla019021,Cla010704,Cla005603,Cla019645,Cla013433,Cla005375,Cla018314,Cla019958,Cla016041,Cla021016,Cla017808
GO:0016679	oxidoreductase activity, acting on diphenols and related substances as donors	molecular_function	0.19009	0.95864	7	2218	34	15506	Cla005926,Cla004584,Cla005925,Cla019591,Cla009108,Novel00121,Cla001947
GO:0006537	glutamate biosynthetic process	biological_process	0.19082	0.95904	2	2218	6	15506	Cla004245,Cla009782
GO:0015930	glutamate synthase activity	molecular_function	0.19082	0.95904	2	2218	6	15506	Cla004245,Cla009782
GO:0043650	dicarboxylic acid biosynthetic process	biological_process	0.19082	0.95904	2	2218	6	15506	Cla004245,Cla009782
GO:0022836	gated channel activity	molecular_function	0.19251	0.96565	16	2218	95	15506	Cla020293,Cla003303,Cla016926,Cla010691,Cla021209,Cla017037,Cla007674,Cla014389,Cla014150,Cla004473,Cla001947,Cla008341,Cla009747,Cla018794,Novel01071,Cla009044
GO:0006094	gluconeogenesis	biological_process	0.193	0.96565	3	2218	11	15506	Cla022170,Cla022499,Cla023084
GO:0019319	hexose biosynthetic process	biological_process	0.193	0.96565	3	2218	11	15506	Cla023084,Cla022170,Cla022499
GO:0046364	monosaccharide biosynthetic process	biological_process	0.193	0.96565	3	2218	11	15506	Cla022499,Cla022170,Cla023084
GO:0019054	modulation by virus of host process	biological_process	0.1935	0.96596	3	2218	10	15506	Cla016176,Cla007501,Cla017615
GO:0044068	modulation by symbiont of host cellular process	biological_process	0.1935	0.96596	3	2218	10	15506	Cla007501,Cla016176,Cla017615
GO:0006777	Mo-molybdopterin cofactor biosynthetic process	biological_process	0.19415	0.96696	3	2218	11	15506	Cla021256,Cla002350,Cla015001
GO:0019720	Mo-molybdopterin cofactor metabolic process	biological_process	0.19415	0.96696	3	2218	11	15506	Cla002350,Cla015001,Cla021256
GO:0050661	NADP binding	molecular_function	0.19435	0.96696	9	2218	45	15506	Cla004245,Cla007303,Cla006886,Cla019193,Cla011132,Cla006885,Cla000612,Cla005671,Cla010932
GO:0019087	transformation of host cell by virus	biological_process	0.19596	0.9739	5	2218	22	15506	Cla010580,Cla010875,Cla019571,Cla010405,Cla009630
GO:0043021	ribonucleoprotein complex binding	molecular_function	0.19648	0.97524	4	2218	16	15506	Cla007833,Cla010217,Cla007369,Cla007370
GO:0016559	peroxisome fission	biological_process	0.19697	0.97524	2	2218	6	15506	Cla006271,Cla006926
GO:0033108	mitochondrial respiratory chain complex assembly	biological_process	0.19708	0.97524	2	2218	6	15506	Cla000813,Novel00933
GO:0015937	coenzyme A biosynthetic process	biological_process	0.19776	0.97524	3	2218	11	15506	Cla007102,Cla019814,Cla008501
GO:0033866	nucleoside bisphosphate biosynthetic process	biological_process	0.19776	0.97524	3	2218	11	15506	Cla007102,Cla008501,Cla019814
GO:0034030	ribonucleoside bisphosphate biosynthetic process	biological_process	0.19776	0.97524	3	2218	11	15506	Cla008501,Cla019814,Cla007102
GO:0034033	purine nucleoside bisphosphate biosynthetic process	biological_process	0.19776	0.97524	3	2218	11	15506	Cla007102,Cla019814,Cla008501
GO:0016634	oxidoreductase activity, acting on the CH-CH group of donors, oxygen as acceptor	molecular_function	0.198	0.97534	2	2218	6	15506	Cla003665,Cla005450
GO:0016835	carbon-oxygen lyase activity	molecular_function	0.19826	0.97556	21	2218	120	15506	Cla008809,Cla009410,Cla016773,Cla021348,Cla005871,Cla010879,Cla009294,Cla011998,Cla007779,Cla009745,Cla010898,Cla012137,Cla016861,Cla011810,Cla008191,Cla014760,Cla023234,Cla019014,Cla007333,Cla018367,Cla013776
GO:0098803	respiratory chain complex	cellular_component	0.19935	0.9796	4	2218	16	15506	Cla017692,Cla001181,Cla020955,Cla011555
GO:0031967	organelle envelope	cellular_component	0.19952	0.9796	35	2218	209	15506	Cla008887,Cla000667,Cla015466,Cla019834,Cla010292,Cla021891,Cla019971,Cla017692,Cla003005,Novel01098,Cla009906,Cla013730,Cla015497,Cla022686,Cla020053,Cla009207,Cla018556,Cla004074,Novel00471,Cla001181,Cla020816,Cla021734,Novel00688,Cla020955,Cla018895,Cla006136,Cla011011,Cla007619,Novel01194,Cla011555,Novel00965,Cla010745,Cla012694,Cla009215,Cla003667
GO:0019866	organelle inner membrane	cellular_component	0.20017	0.98172	15	2218	82	15506	Cla003005,Cla017692,Cla019971,Cla020955,Novel01098,Cla018556,Cla006136,Cla009906,Novel00965,Cla020816,Cla001181,Cla011555,Cla019834,Cla015497,Novel00471
GO:0007126	meiotic nuclear division	biological_process	0.20119	0.98178	4	2218	16	15506	Cla014433,Cla008555,Cla007656,Cla022431
GO:1903046	meiotic cell cycle process	biological_process	0.20119	0.98178	4	2218	16	15506	Cla007656,Cla022431,Cla008555,Cla014433
GO:0061695	transferase complex, transferring phosphorus-containing groups	cellular_component	0.20125	0.98178	17	2218	96	15506	Cla002370,Cla017877,Cla003084,Cla007696,Novel01240,Cla021209,Cla017037,Cla014389,Cla018574,Cla006812,Cla015001,Cla002332,Cla008341,Cla014303,Cla023338,Cla013328,Cla004685
GO:0009274	peptidoglycan-based cell wall	cellular_component	0.20129	0.98178	2	2218	6	15506	Cla011373,Cla005387
GO:0009276	Gram-negative-bacterium-type cell wall	cellular_component	0.20129	0.98178	2	2218	6	15506	Cla005387,Cla011373
GO:0015886	heme transport	biological_process	0.2031	0.98846	3	2218	11	15506	Cla007824,Cla001593,Cla021806
GO:1901678	iron coordination entity transport	biological_process	0.2031	0.98846	3	2218	11	15506	Cla021806,Cla001593,Cla007824
GO:0015144	carbohydrate transmembrane transporter activity	molecular_function	0.20428	0.99093	6	2218	28	15506	Cla000731,Cla006870,Cla007212,Cla018314,Cla017037,Cla001092
GO:1901476	carbohydrate transporter activity	molecular_function	0.20428	0.99093	6	2218	28	15506	Cla007212,Cla018314,Cla006870,Cla000731,Cla001092,Cla017037
GO:0004872	receptor activity	molecular_function	0.20583	0.99737	24	2218	151	15506	Cla020056,Cla021293,Cla007745,Cla019293,Cla003303,Cla016926,Cla006317,Cla012575,Novel00518,Cla007461,Cla007674,Cla007073,Cla010793,Cla004473,Cla014732,Cla020286,Cla009747,Novel00411,Cla010171,Cla001020,Novel00137,Cla018794,Cla015498,Cla012739
GO:0030176	integral component of endoplasmic reticulum membrane	cellular_component	0.20761	1	6	2218	29	15506	Cla013328,Novel00411,Cla008829,Cla018660,Cla022724,Novel00643
GO:0031227	intrinsic component of endoplasmic reticulum membrane	cellular_component	0.20761	1	6	2218	29	15506	Novel00643,Cla022724,Cla008829,Cla018660,Novel00411,Cla013328
GO:0009108	coenzyme biosynthetic process	biological_process	0.20963	1	17	2218	95	15506	Cla007102,Cla014854,Cla021256,Cla004284,Cla015001,Cla010547,Cla016386,Cla004584,Cla014068,Cla007239,Cla002350,Cla021251,Cla017988,Cla008501,Cla009745,Cla019814,Cla003989
GO:0035556	intracellular signal transduction	biological_process	0.20965	1	49	2218	308	15506	Cla012278,Cla009259,Cla019176,Cla010071,Cla007427,Cla022303,Cla008972,Novel00249,Cla011016,Cla015337,Cla014131,Cla019885,Cla010704,Cla002891,Cla022844,Cla020249,Cla013732,Cla004564,Cla013455,Cla018576,Cla001020,Cla000798,Cla018049,Cla007817,Cla013152,Cla016137,Cla020858,Cla021997,Cla020604,Cla005375,Cla005603,Cla019645,Cla009157,Cla016336,Cla013877,Cla023215,Cla014899,Cla011936,Cla011536,Cla00466…
GO:0030545	receptor regulator activity	molecular_function	0.21029	1	2	2218	6	15506	Cla012212,Cla003298
GO:0030547	receptor inhibitor activity	molecular_function	0.21029	1	2	2218	6	15506	Cla003298,Cla012212
GO:0030548	acetylcholine receptor regulator activity	molecular_function	0.21029	1	2	2218	6	15506	Cla012212,Cla003298
GO:0030550	acetylcholine receptor inhibitor activity	molecular_function	0.21029	1	2	2218	6	15506	Cla003298,Cla012212
GO:0009271	phage shock	biological_process	0.21037	1	3	2218	12	15506	Cla020079,Cla019297,Cla017109
GO:0098586	cellular response to virus	biological_process	0.21037	1	3	2218	12	15506	Cla017109,Cla020079,Cla019297
GO:0034593	phosphatidylinositol bisphosphate phosphatase activity	molecular_function	0.21114	1	1	2218	2	15506	Cla005570
GO:0034596	phosphatidylinositol phosphate 4-phosphatase activity	molecular_function	0.21114	1	1	2218	2	15506	Cla005570
GO:0034597	phosphatidylinositol-4,5-bisphosphate 4-phosphatase activity	molecular_function	0.21114	1	1	2218	2	15506	Cla005570
GO:0046839	phospholipid dephosphorylation	biological_process	0.21114	1	1	2218	2	15506	Cla005570
GO:0046856	phosphatidylinositol dephosphorylation	biological_process	0.21114	1	1	2218	2	15506	Cla005570
GO:0052866	phosphatidylinositol phosphate phosphatase activity	molecular_function	0.21114	1	1	2218	2	15506	Cla005570
GO:0001871	pattern binding	molecular_function	0.21145	1	8	2218	43	15506	Cla021160,Cla006736,Cla021293,Cla019379,Cla015356,Cla011870,Cla013193,Cla007709
GO:0030247	polysaccharide binding	molecular_function	0.21145	1	8	2218	43	15506	Cla007709,Cla013193,Cla011870,Cla015356,Cla019379,Cla021293,Cla021160,Cla006736
GO:0015947	methane metabolic process	biological_process	0.21263	1	6	2218	30	15506	Cla008389,Cla012753,Cla015641,Cla004332,Cla016120,Cla006797
GO:0043446	cellular alkane metabolic process	biological_process	0.21263	1	6	2218	30	15506	Cla004332,Cla016120,Cla006797,Cla008389,Cla012753,Cla015641
GO:0017006	protein-tetrapyrrole linkage	biological_process	0.2128	1	2	2218	6	15506	Cla002647,Cla014321
GO:0042151	nematocyst	cellular_component	0.21343	1	2	2218	6	15506	Cla006136,Cla000258
GO:0005759	mitochondrial matrix	cellular_component	0.2136	1	5	2218	22	15506	Cla023068,Novel00643,Cla013678,Cla021413,Cla017927
GO:0009755	hormone-mediated signaling pathway	biological_process	0.21409	1	2	2218	6	15506	Cla019293,Cla010171
GO:0032870	cellular response to hormone stimulus	biological_process	0.21409	1	2	2218	6	15506	Cla010171,Cla019293
GO:0004161	dimethylallyltranstransferase activity	molecular_function	0.21414	1	3	2218	11	15506	Cla004278,Cla003535,Cla007969
GO:0004797	thymidine kinase activity	molecular_function	0.21575	1	2	2218	6	15506	Cla013670,Cla009043
GO:0019136	deoxynucleoside kinase activity	molecular_function	0.21575	1	2	2218	6	15506	Cla009043,Cla013670
GO:0019206	nucleoside kinase activity	molecular_function	0.21575	1	2	2218	6	15506	Cla009043,Cla013670
GO:0006613	cotranslational protein targeting to membrane	biological_process	0.21616	1	9	2218	48	15506	Cla023201,Cla007369,Novel00643,Cla020551,Cla019070,Cla005583,Cla007370,Cla022698,Cla021256
GO:0009055	electron carrier activity	molecular_function	0.21755	1	35	2218	206	15506	Cla016695,Cla021079,Cla015464,Novel00317,Cla013694,Cla022460,Cla022868,Cla000840,Cla013019,Cla000525,Cla007427,Cla002352,Cla009615,Cla008029,Cla003456,Cla022283,Cla009007,Cla000199,Cla010417,Cla022563,Cla012694,Cla002517,Cla021628,Cla009397,Novel01194,Cla022333,Cla022408,Cla007123,Cla016176,Cla017688,Cla011409,Cla022682,Cla006447,Cla001181,Cla011786
GO:0006760	folic acid-containing compound metabolic process	biological_process	0.22018	1	6	2218	28	15506	Cla004284,Cla014068,Cla016386,Cla010547,Cla003989,Cla021251
GO:0006827	high-affinity iron ion transmembrane transport	biological_process	0.22033	1	1	2218	2	15506	Cla011094
GO:0033573	high-affinity iron permease complex	cellular_component	0.22033	1	1	2218	2	15506	Cla011094
GO:0002376	immune system process	biological_process	0.22272	1	15	2218	86	15506	Cla020604,Cla019444,Cla021293,Cla014048,Novel00827,Cla010030,Cla009478,Cla010205,Cla013877,Cla020820,Cla013324,Cla014032,Novel00689,Cla003276,Cla012636
GO:0004725	protein tyrosine phosphatase activity	molecular_function	0.22286	1	6	2218	29	15506	Cla013973,Cla010030,Cla011058,Novel00689,Cla013695,Cla009377
GO:0006289	nucleotide-excision repair	biological_process	0.22606	1	4	2218	17	15506	Cla014316,Cla009612,Novel00204,Cla017222
GO:0006950	response to stress	biological_process	0.22688	1	127	2218	836	15506	Cla019611,Cla018885,Cla008918,Cla019498,Cla017661,Cla010410,Cla005204,Cla021734,Cla004257,Cla015315,Cla015240,Cla015064,Cla013254,Cla014172,Cla018519,Cla003610,Cla009035,Cla021379,Cla018210,Cla018017,Cla020079,Cla009478,Cla004278,Cla002913,Cla013337,Cla014316,Cla002747,Cla018314,Cla005157,Cla017851,Cla005202,Cla008291,Cla012753,Cla010310,Cla010900,Cla005871,Cla021949,Cla022984,Cla018501,Cla022203…
GO:0004489	methylenetetrahydrofolate reductase (NAD(P)H) activity	molecular_function	0.2269	1	1	2218	2	15506	Cla010611
GO:0008174	mRNA methyltransferase activity	molecular_function	0.22697	1	2	2218	6	15506	Cla016822,Cla020276
GO:0042030	ATPase inhibitor activity	molecular_function	0.22711	1	4	2218	18	15506	Cla022107,Cla013688,Cla001829,Cla011084
GO:0016638	oxidoreductase activity, acting on the CH-NH2 group of donors	molecular_function	0.22764	1	5	2218	25	15506	Cla009782,Cla012129,Cla021934,Cla008070,Cla004245
GO:0006050	mannosamine metabolic process	biological_process	0.22852	1	2	2218	6	15506	Cla017988,Cla018594
GO:0006051	N-acetylmannosamine metabolic process	biological_process	0.22852	1	2	2218	6	15506	Cla017988,Cla018594
GO:0047465	N-acylglucosamine-6-phosphate 2-epimerase activity	molecular_function	0.22852	1	2	2218	6	15506	Cla018594,Cla017988
GO:0004616	phosphogluconate dehydrogenase (decarboxylating) activity	molecular_function	0.22869	1	8	2218	40	15506	Cla012602,Cla000258,Cla010932,Cla007434,Cla005671,Cla016673,Cla016672,Cla004999
GO:0051640	organelle localization	biological_process	0.22889	1	2	2218	6	15506	Cla011936,Cla009901
GO:0009059	macromolecule biosynthetic process	biological_process	0.22901	1	381	2218	2573	15506	Cla008975,Cla022431,Cla016331,Cla007673,Novel01142,Cla014032,Cla004564,Cla004626,Cla009910,Novel01170,Cla000547,Cla016761,Cla017291,Cla005395,Cla021209,Cla004490,Cla008978,Cla015253,Cla005201,Cla017274,Cla015452,Cla020266,Cla021357,Cla013731,Cla005343,Cla015802,Cla005994,Novel00204,Cla013147,Cla007265,Cla008104,Cla013328,Cla020457,Cla016009,Cla007788,Cla002332,Cla022644,Cla015308,Cla022077,Cla008…
GO:0051189	prosthetic group metabolic process	biological_process	0.22904	1	4	2218	18	15506	Cla015001,Cla002350,Cla011094,Cla021256
GO:0016791	phosphatase activity	molecular_function	0.22945	1	25	2218	154	15506	Cla010030,Cla022337,Cla005570,Cla021357,Cla013695,Cla023341,Cla023201,Cla012154,Cla019056,Cla012918,Cla007828,Cla004220,Cla011058,Cla011367,Cla013973,Cla011125,Cla009377,Cla018666,Cla010377,Cla017808,Cla018918,Cla018314,Novel00689,Cla003623,Cla000876
GO:0005230	extracellular ligand-gated ion channel activity	molecular_function	0.2304	1	6	2218	34	15506	Cla003303,Cla016926,Cla009747,Cla004473,Cla007674,Cla018794
GO:0009166	nucleotide catabolic process	biological_process	0.23157	1	2	2218	6	15506	Cla011125,Cla003262
GO:1901292	nucleoside phosphate catabolic process	biological_process	0.23157	1	2	2218	6	15506	Cla011125,Cla003262
GO:0005249	voltage-gated potassium channel activity	molecular_function	0.2317	1	4	2218	18	15506	Novel01071,Cla009747,Cla020293,Cla001947
GO:0033218	amide binding	molecular_function	0.23251	1	4	2218	17	15506	Cla007370,Cla007369,Cla010537,Novel01030
GO:0016272	prefoldin complex	cellular_component	0.23255	1	5	2218	22	15506	Cla013730,Cla021734,Cla019797,Cla003885,Cla019606
GO:0007020	microtubule nucleation	biological_process	0.23288	1	2	2218	8	15506	Cla012454,Cla008037
GO:0010968	regulation of microtubule nucleation	biological_process	0.23288	1	2	2218	8	15506	Cla012454,Cla008037
GO:0031112	positive regulation of microtubule polymerization or depolymerization	biological_process	0.23288	1	2	2218	8	15506	Cla012454,Cla008037
GO:0031113	regulation of microtubule polymerization	biological_process	0.23288	1	2	2218	8	15506	Cla008037,Cla012454
GO:0031116	positive regulation of microtubule polymerization	biological_process	0.23288	1	2	2218	8	15506	Cla008037,Cla012454
GO:0046785	microtubule polymerization	biological_process	0.23288	1	2	2218	8	15506	Cla012454,Cla008037
GO:0090063	positive regulation of microtubule nucleation	biological_process	0.23288	1	2	2218	8	15506	Cla012454,Cla008037
GO:0006308	DNA catabolic process	biological_process	0.23572	1	3	2218	12	15506	Cla010434,Cla000199,Cla014185
GO:0004375	glycine dehydrogenase (decarboxylating) activity	molecular_function	0.23671	1	1	2218	2	15506	Cla021934
GO:0006546	glycine catabolic process	biological_process	0.23671	1	1	2218	2	15506	Cla021934
GO:0009071	serine family amino acid catabolic process	biological_process	0.23671	1	1	2218	2	15506	Cla021934
GO:0016642	oxidoreductase activity, acting on the CH-NH2 group of donors, disulfide as acceptor	molecular_function	0.23671	1	1	2218	2	15506	Cla021934
GO:0031647	regulation of protein stability	biological_process	0.23673	1	2	2218	7	15506	Cla001954,Cla003429
GO:0050821	protein stabilization	biological_process	0.23673	1	2	2218	7	15506	Cla001954,Cla003429
GO:0004930	G-protein coupled receptor activity	molecular_function	0.23786	1	6	2218	31	15506	Cla007073,Novel00518,Cla012575,Cla020286,Cla020056,Cla007461
GO:0009311	oligosaccharide metabolic process	biological_process	0.23918	1	11	2218	62	15506	Cla010205,Cla018595,Cla021407,Cla011131,Cla008123,Cla021734,Cla005675,Cla011371,Cla011369,Cla018918,Cla015692
GO:0007517	muscle organ development	biological_process	0.23944	1	1	2218	2	15506	Cla015270
GO:0061061	muscle structure development	biological_process	0.23944	1	1	2218	2	15506	Cla015270
GO:0004668	protein-arginine deiminase activity	molecular_function	0.2404	1	1	2218	2	15506	Cla019021
GO:0009445	putrescine metabolic process	biological_process	0.2404	1	1	2218	2	15506	Cla019021
GO:0009446	putrescine biosynthetic process	biological_process	0.2404	1	1	2218	2	15506	Cla019021
GO:0016813	hydrolase activity, acting on carbon-nitrogen (but not peptide) bonds, in linear amidines	molecular_function	0.2404	1	1	2218	2	15506	Cla019021
GO:0015049	methane monooxygenase activity	molecular_function	0.24049	1	1	2218	2	15506	Cla016120
GO:0031345	negative regulation of cell projection organization	biological_process	0.24162	1	1	2218	2	15506	Cla018240
GO:0048027	mRNA 5'-UTR binding	molecular_function	0.24162	1	1	2218	2	15506	Cla018240
GO:1902116	negative regulation of organelle assembly	biological_process	0.24162	1	1	2218	2	15506	Cla018240
GO:1902209	negative regulation of bacterial-type flagellum assembly	biological_process	0.24162	1	1	2218	2	15506	Cla018240
GO:1902582	single-organism intracellular transport	biological_process	0.24258	1	49	2218	310	15506	Cla009901,Cla009478,Cla003667,Cla008089,Cla016465,Cla021256,Cla007369,Cla002625,Cla015603,Cla011011,Cla015019,Cla023321,Cla008070,Cla017615,Cla015555,Cla007350,Cla018895,Cla019611,Cla018195,Novel00688,Cla021734,Cla014746,Cla023201,Cla014028,Cla015817,Cla012749,Cla004074,Cla019070,Novel01170,Cla004935,Cla019797,Cla007370,Cla011241,Cla011177,Cla016818,Cla022686,Cla020551,Cla005853,Cla013811,Cla0055…
GO:0016695	oxidoreductase activity, acting on hydrogen as donor	molecular_function	0.24278	1	1	2218	2	15506	Cla004332
GO:0018537	coenzyme F420-dependent N5,N10-methenyltetrahydromethanopterin reductase activity	molecular_function	0.24278	1	1	2218	2	15506	Cla004332
GO:0046995	oxidoreductase activity, acting on hydrogen as donor, with other known acceptors	molecular_function	0.24278	1	1	2218	2	15506	Cla004332
GO:0047068	N5,N10-methenyltetrahydromethanopterin hydrogenase activity	molecular_function	0.24278	1	1	2218	2	15506	Cla004332
GO:0004871	signal transducer activity	molecular_function	0.24332	1	37	2218	240	15506	Cla012575,Cla006317,Cla010071,Cla016926,Cla003303,Cla009259,Cla019293,Cla012278,Cla007073,Cla015337,Cla007674,Cla004473,Cla019797,Cla010793,Cla022844,Cla015498,Cla000798,Cla001020,Cla013455,Cla010171,Cla017615,Novel00518,Cla007745,Cla020056,Cla007461,Cla009157,Cla020286,Cla009747,Cla010285,Cla018469,Cla015527,Cla005491,Cla018794,Cla010079,Cla019958,Cla004222,Novel00411
GO:0003796	lysozyme activity	molecular_function	0.24344	1	1	2218	2	15506	Cla015515
GO:0009496	plastoquinol--plastocyanin reductase activity	molecular_function	0.24444	1	1	2218	2	15506	Cla001947
GO:0052880	oxidoreductase activity, acting on diphenols and related substances as donors, with copper protein as acceptor	molecular_function	0.24444	1	1	2218	2	15506	Cla001947
GO:0016977	chitosanase activity	molecular_function	0.24472	1	1	2218	2	15506	Novel01186
GO:0005326	neurotransmitter transporter activity	molecular_function	0.24483	1	1	2218	2	15506	Cla015484
GO:0005328	neurotransmitter:sodium symporter activity	molecular_function	0.24483	1	1	2218	2	15506	Cla015484
GO:0035821	modification of morphology or physiology of other organism	biological_process	0.2449	1	11	2218	60	15506	Cla010580,Cla017615,Cla019444,Cla019113,Cla007501,Cla004918,Cla010875,Cla016176,Cla009630,Cla010405,Cla019571
GO:0032039	integrator complex	cellular_component	0.24536	1	1	2218	2	15506	Cla002370
GO:0010277	chlorophyllide a oxygenase [overall] activity	molecular_function	0.2457	1	2	2218	7	15506	Cla001857,Cla011099
GO:0030255	protein secretion by the type IV secretion system	biological_process	0.24579	1	1	2218	2	15506	Novel01282
GO:0044097	secretion by the type IV secretion system	biological_process	0.24579	1	1	2218	2	15506	Novel01282
GO:0051775	response to redox state	biological_process	0.24601	1	1	2218	2	15506	Novel01185
GO:0007098	centrosome cycle	biological_process	0.24602	1	1	2218	2	15506	Cla012513
GO:0010824	regulation of centrosome duplication	biological_process	0.24602	1	1	2218	2	15506	Cla012513
GO:0010826	negative regulation of centrosome duplication	biological_process	0.24602	1	1	2218	2	15506	Cla012513
GO:0031513	nonmotile primary cilium	cellular_component	0.24602	1	1	2218	2	15506	Cla012513
GO:0035869	ciliary transition zone	cellular_component	0.24602	1	1	2218	2	15506	Cla012513
GO:0036038	TCTN-B9D complex	cellular_component	0.24602	1	1	2218	2	15506	Cla012513
GO:0044441	ciliary part	cellular_component	0.24602	1	1	2218	2	15506	Cla012513
GO:0046605	regulation of centrosome cycle	biological_process	0.24602	1	1	2218	2	15506	Cla012513
GO:0046606	negative regulation of centrosome cycle	biological_process	0.24602	1	1	2218	2	15506	Cla012513
GO:0051298	centrosome duplication	biological_process	0.24602	1	1	2218	2	15506	Cla012513
GO:0072372	primary cilium	cellular_component	0.24602	1	1	2218	2	15506	Cla012513
GO:0098602	single organism cell adhesion	biological_process	0.24604	1	1	2218	2	15506	Cla009901
GO:0006955	immune response	biological_process	0.24636	1	11	2218	62	15506	Cla013877,Cla013324,Cla014032,Novel00689,Cla003276,Cla012636,Cla020604,Cla021293,Novel00827,Cla014048,Cla010205
GO:0042558	pteridine-containing compound metabolic process	biological_process	0.24637	1	7	2218	35	15506	Cla010547,Cla016386,Cla009745,Cla014068,Cla004284,Cla021251,Cla003989
GO:0030288	outer membrane-bounded periplasmic space	cellular_component	0.24724	1	1	2218	2	15506	Cla012201
GO:0009251	glucan catabolic process	biological_process	0.24738	1	1	2218	2	15506	Cla016671
GO:0030245	cellulose catabolic process	biological_process	0.24738	1	1	2218	2	15506	Cla016671
GO:0044247	cellular polysaccharide catabolic process	biological_process	0.24738	1	1	2218	2	15506	Cla016671
GO:0051275	beta-glucan catabolic process	biological_process	0.24738	1	1	2218	2	15506	Cla016671
GO:0031124	mRNA 3'-end processing	biological_process	0.24765	1	3	2218	12	15506	Cla010791,Cla019068,Cla021247
GO:0042555	MCM complex	cellular_component	0.24829	1	1	2218	2	15506	Cla017202
GO:0016708	oxidoreductase activity, acting on paired donors, with incorporation or reduction of molecular oxygen, NAD(P)H as one donor, and incorporation of two atoms of oxygen into one donor	molecular_function	0.24837	1	1	2218	2	15506	Cla001775
GO:0044599	AP-5 adaptor complex	cellular_component	0.24841	1	1	2218	2	15506	Cla004183
GO:0006796	phosphate-containing compound metabolic process	biological_process	0.24972	1	190	2218	1330	15506	Cla011595,Cla015001,Cla009354,Cla007102,Cla014129,Cla012212,Novel01119,Cla021225,Cla015485,Cla015723,Cla017722,Cla021734,Cla019814,Cla006032,Cla021514,Cla021071,Cla013415,Cla020164,Cla021407,Cla019492,Cla003262,Cla015497,Cla018362,Cla008298,Cla002350,Cla007709,Cla018367,Cla013455,Cla011726,Cla021131,Cla013986,Cla008291,Cla017220,Cla016672,Cla005471,Cla020553,Cla007592,Cla015963,Cla016863,Cla00294…
GO:0045202	synapse	cellular_component	0.24974	1	2	2218	7	15506	Cla002865,Novel01282
GO:0031419	cobalamin binding	molecular_function	0.24976	1	2	2218	7	15506	Cla018097,Cla019909
GO:0005164	tumor necrosis factor receptor binding	molecular_function	0.25011	1	1	2218	2	15506	Cla014032
GO:0032813	tumor necrosis factor receptor superfamily binding	molecular_function	0.25011	1	1	2218	2	15506	Cla014032
GO:0034062	RNA polymerase activity	molecular_function	0.25034	1	28	2218	174	15506	Cla009946,Cla012972,Cla022806,Cla019316,Cla021257,Cla012739,Cla015498,Cla007817,Cla003960,Cla023167,Cla001518,Cla021782,Cla008341,Cla005283,Cla004469,Cla009133,Cla012411,Cla014389,Cla010997,Cla004490,Cla021209,Cla017037,Cla003999,Cla008376,Cla017266,Cla009401,Cla020955,Cla021436
GO:0005283	sodium:amino acid symporter activity	molecular_function	0.2506	1	1	2218	2	15506	Cla019527
GO:0005416	cation:amino acid symporter activity	molecular_function	0.2506	1	1	2218	2	15506	Cla019527
GO:0019843	rRNA binding	molecular_function	0.25064	1	4	2218	17	15506	Cla007673,Cla004936,Cla014211,Cla005343
GO:0030493	bacteriochlorophyll metabolic process	biological_process	0.25141	1	2	2218	7	15506	Cla016861,Cla008210
GO:0030494	bacteriochlorophyll biosynthetic process	biological_process	0.25141	1	2	2218	7	15506	Cla008210,Cla016861
GO:0046429	4-hydroxy-3-methylbut-2-en-1-yl diphosphate synthase activity	molecular_function	0.25172	1	1	2218	2	15506	Cla005033
GO:0052592	oxidoreductase activity, acting on CH or CH2 groups, with an iron-sulfur protein as acceptor	molecular_function	0.25172	1	1	2218	2	15506	Cla005033
GO:0005275	amine transmembrane transporter activity	molecular_function	0.25174	1	1	2218	2	15506	Cla019444
GO:0015101	organic cation transmembrane transporter activity	molecular_function	0.25174	1	1	2218	2	15506	Cla019444
GO:0015665	alcohol transmembrane transporter activity	molecular_function	0.25174	1	1	2218	2	15506	Cla019444
GO:0015695	organic cation transport	biological_process	0.25174	1	1	2218	2	15506	Cla019444
GO:0015837	amine transport	biological_process	0.25174	1	1	2218	2	15506	Cla019444
GO:0034228	ethanolamine transmembrane transporter activity	molecular_function	0.25174	1	1	2218	2	15506	Cla019444
GO:0034229	ethanolamine transport	biological_process	0.25174	1	1	2218	2	15506	Cla019444
GO:0006793	phosphorus metabolic process	biological_process	0.2526	1	190	2218	1331	15506	Cla016117,Cla008332,Cla009015,Cla004847,Cla007229,Cla004999,Cla010030,Cla001251,Cla013877,Cla008614,Cla006735,Cla005412,Cla013268,Cla008861,Cla011936,Novel00471,Cla014418,Cla005491,Cla016673,Cla017316,Cla001321,Cla018530,Cla016945,Cla003339,Cla010280,Cla010644,Cla003218,Cla012636,Cla011555,Cla019971,Cla013695,Cla003902,Cla006736,Cla005514,Cla017266,Cla007714,Cla003005,Novel01098,Cla012575,Cla0179…
GO:0033014	tetrapyrrole biosynthetic process	biological_process	0.25268	1	21	2218	123	15506	Cla008210,Cla010547,Cla014239,Cla007434,Cla020208,Cla020476,Cla016861,Cla017299,Cla004284,Cla002517,Cla006332,Cla004245,Cla009215,Cla002033,Cla014760,Cla012137,Cla007272,Cla022670,Cla011998,Cla001251,Cla005450
GO:0043167	ion binding	molecular_function	0.25389	1	629	2218	4441	15506	Cla003926,Cla018409,Cla006505,Cla019498,Novel00273,Cla004257,Cla022910,Cla008577,Cla014045,Cla002818,Cla016088,Cla005283,Cla019056,Cla017525,Cla016921,Cla006332,Cla023103,Cla015969,Cla012694,Cla021782,Cla019170,Cla005909,Cla022806,Cla012753,Novel01111,Cla021430,Cla013699,Cla002414,Cla016926,Cla016863,Cla007667,Cla005499,Cla007592,Cla013639,Cla003434,Cla017036,Cla020916,Cla007846,Cla011547,Cla0232…
GO:0016857	racemase and epimerase activity, acting on carbohydrates and derivatives	molecular_function	0.25444	1	4	2218	18	15506	Cla018056,Cla017988,Cla018594,Novel01098
GO:0071310	cellular response to organic substance	biological_process	0.2556	1	3	2218	12	15506	Cla019293,Cla010171,Cla011936
GO:0005044	scavenger receptor activity	molecular_function	0.25587	1	2	2218	7	15506	Cla012739,Cla021293
GO:0038024	cargo receptor activity	molecular_function	0.25587	1	2	2218	7	15506	Cla021293,Cla012739
GO:0003899	DNA-directed RNA polymerase activity	molecular_function	0.25596	1	22	2218	133	15506	Cla003999,Cla021209,Cla004490,Cla017037,Cla014389,Cla010997,Cla012411,Cla004469,Cla005283,Cla020955,Cla021436,Cla008376,Cla021782,Cla023167,Cla001518,Cla007817,Cla015498,Cla012739,Cla021257,Cla019316,Cla009946,Cla008341
GO:0006383	transcription from RNA polymerase III promoter	biological_process	0.2561	1	6	2218	29	15506	Cla003005,Cla021209,Cla017037,Cla008066,Cla014389,Cla008341
GO:0018580	nitronate monooxygenase activity	molecular_function	0.25631	1	3	2218	12	15506	Cla017273,Cla017988,Cla009782
GO:0050750	low-density lipoprotein particle receptor binding	molecular_function	0.25635	1	1	2218	2	15506	Cla016465
GO:0070325	lipoprotein particle receptor binding	molecular_function	0.25635	1	1	2218	2	15506	Cla016465
GO:0044462	external encapsulating structure part	cellular_component	0.2571	1	2	2218	7	15506	Cla002376,Cla012201
GO:0098519	nucleotide phosphatase activity, acting on free nucleotides	molecular_function	0.25711	1	8	2218	48	15506	Cla023201,Cla017808,Cla007828,Cla018314,Cla004220,Cla011367,Cla021357,Cla023341
GO:0016998	cell wall macromolecule catabolic process	biological_process	0.25732	1	4	2218	18	15506	Cla014339,Cla015515,Cla023166,Cla016465
GO:0008653	lipopolysaccharide metabolic process	biological_process	0.25775	1	2	2218	7	15506	Novel01098,Cla012748
GO:0009103	lipopolysaccharide biosynthetic process	biological_process	0.25775	1	2	2218	7	15506	Novel01098,Cla012748
GO:0070569	uridylyltransferase activity	molecular_function	0.2583	1	3	2218	13	15506	Cla013902,Cla021208,Cla009879
GO:0045892	negative regulation of transcription, DNA-templated	biological_process	0.25921	1	6	2218	31	15506	Cla011799,Cla014032,Cla003602,Cla005583,Novel01185,Cla001799
GO:0051253	negative regulation of RNA metabolic process	biological_process	0.25921	1	6	2218	31	15506	Cla005583,Cla003602,Cla001799,Novel01185,Cla011799,Cla014032
GO:1902679	negative regulation of RNA biosynthetic process	biological_process	0.25921	1	6	2218	31	15506	Cla003602,Cla005583,Novel01185,Cla001799,Cla011799,Cla014032
GO:1903507	negative regulation of nucleic acid-templated transcription	biological_process	0.25921	1	6	2218	31	15506	Cla014032,Cla011799,Cla001799,Novel01185,Cla005583,Cla003602
GO:0030150	protein import into mitochondrial matrix	biological_process	0.25929	1	3	2218	13	15506	Cla018895,Cla003667,Cla011011
GO:0006415	translational termination	biological_process	0.25967	1	4	2218	18	15506	Cla018955,Cla005690,Cla019797,Cla010217
GO:0003978	UDP-glucose 4-epimerase activity	molecular_function	0.26031	1	1	2218	2	15506	Novel01098
GO:0004451	isocitrate lyase activity	molecular_function	0.26091	1	1	2218	2	15506	Cla010754
GO:0005544	calcium-dependent phospholipid binding	molecular_function	0.2614	1	3	2218	12	15506	Cla005909,Cla009948,Cla001954
GO:0005135	interleukin-3 receptor binding	molecular_function	0.26264	1	1	2218	2	15506	Cla013324
GO:0034645	cellular macromolecule biosynthetic process	biological_process	0.26295	1	375	2218	2542	15506	Cla023235,Cla017411,Cla008396,Cla014216,Cla008195,Cla010217,Cla018081,Cla017734,Novel00411,Cla019341,Cla023167,Cla012547,Cla009256,Cla011721,Cla011083,Cla020737,Cla005985,Cla015276,Cla012214,Cla020469,Cla021375,Cla020278,Cla020743,Cla004029,Cla017037,Cla020078,Cla018917,Cla011487,Cla011177,Cla019797,Novel00485,Cla001020,Cla004950,Cla001766,Cla017290,Cla007069,Cla005974,Cla001799,Cla008438,Cla0192…
GO:0006779	porphyrin-containing compound biosynthetic process	biological_process	0.26313	1	13	2218	74	15506	Cla007434,Cla010547,Cla008210,Cla005450,Cla001251,Cla022670,Cla007272,Cla002033,Cla002517,Cla004245,Cla004284,Cla016861,Cla020476
GO:0019899	enzyme binding	molecular_function	0.26314	1	10	2218	60	15506	Cla016001,Cla006594,Cla007623,Cla013730,Cla003533,Cla022469,Cla009213,Cla021147,Cla002033,Cla022906
GO:0005173	stem cell factor receptor binding	molecular_function	0.26383	1	1	2218	2	15506	Cla018253
GO:0019783	ubiquitin-like protein-specific protease activity	molecular_function	0.26399	1	3	2218	13	15506	Cla015597,Cla005612,Cla018253
GO:0004559	alpha-mannosidase activity	molecular_function	0.26485	1	2	2218	8	15506	Cla009769,Cla007837
GO:0015923	mannosidase activity	molecular_function	0.26485	1	2	2218	8	15506	Cla009769,Cla007837
GO:0003937	IMP cyclohydrolase activity	molecular_function	0.26489	1	1	2218	2	15506	Cla023338
GO:0004643	phosphoribosylaminoimidazolecarboxamide formyltransferase activity	molecular_function	0.26489	1	1	2218	2	15506	Cla023338
GO:0006614	SRP-dependent cotranslational protein targeting to membrane	biological_process	0.26521	1	8	2218	44	15506	Cla021256,Cla022698,Cla007370,Cla005583,Cla019070,Cla020551,Cla007369,Cla023201
GO:0045047	protein targeting to ER	biological_process	0.26521	1	8	2218	44	15506	Cla023201,Cla007369,Cla020551,Cla019070,Cla005583,Cla007370,Cla022698,Cla021256
GO:0072599	establishment of protein localization to endoplasmic reticulum	biological_process	0.26521	1	8	2218	44	15506	Cla022698,Cla021256,Cla005583,Cla007370,Cla020551,Cla019070,Cla023201,Cla007369
GO:0006231	dTMP biosynthetic process	biological_process	0.26599	1	1	2218	2	15506	Cla016577
GO:0042083	5,10-methylenetetrahydrofolate-dependent methyltransferase activity	molecular_function	0.26599	1	1	2218	2	15506	Cla016577
GO:0046073	dTMP metabolic process	biological_process	0.26599	1	1	2218	2	15506	Cla016577
GO:0005126	cytokine receptor binding	molecular_function	0.26604	1	4	2218	19	15506	Cla018253,Cla014032,Cla014048,Cla013324
GO:0005788	endoplasmic reticulum lumen	cellular_component	0.26617	1	1	2218	2	15506	Cla011902
GO:0044260	cellular macromolecule metabolic process	biological_process	0.26646	1	660	2218	4594	15506	Cla014165,Cla009746,Cla011870,Cla015666,Novel00448,Cla013341,Cla007616,Cla005012,Cla017988,Cla006605,Novel01098,Cla014265,Cla022698,Cla014262,Cla000850,Cla016690,Cla023338,Cla005436,Cla010171,Cla014475,Cla019185,Cla014239,Cla021416,Cla013485,Cla016802,Novel00586,Cla015270,Cla014172,Cla000543,Cla016014,Cla005412,Cla014885,Cla013877,Cla014211,Cla008614,Cla001251,Cla019611,Cla013241,Cla016117,Cla008…
GO:0016021	integral component of membrane	cellular_component	0.26736	1	249	2218	1688	15506	Cla005559,Cla002725,Cla015692,Cla000539,Cla016046,Cla007824,Cla005036,Cla006940,Cla003394,Cla020293,Cla015051,Cla014909,Cla014464,Cla019607,Cla019977,Novel00388,Novel00268,Cla008218,Cla012350,Novel00137,Cla001020,Cla000980,Cla011754,Cla021250,Cla001111,Cla013730,Cla005206,Cla017198,Cla020019,Cla006271,Cla013041,Cla020249,Cla004029,Cla010615,Cla010537,Cla007110,Cla021589,Cla017037,Cla003221,Cla017…
GO:0006538	glutamate catabolic process	biological_process	0.26819	1	1	2218	2	15506	Cla005589
GO:0043649	dicarboxylic acid catabolic process	biological_process	0.26819	1	1	2218	2	15506	Cla005589
GO:0009314	response to radiation	biological_process	0.26833	1	2	2218	8	15506	Cla000735,Cla008125
GO:0009416	response to light stimulus	biological_process	0.26833	1	2	2218	8	15506	Cla008125,Cla000735
GO:0007623	circadian rhythm	biological_process	0.26912	1	2	2218	7	15506	Cla019380,Cla014766
GO:0044036	cell wall macromolecule metabolic process	biological_process	0.27028	1	5	2218	24	15506	Cla014339,Cla015515,Cla003262,Cla016465,Cla023166
GO:0050080	malonyl-CoA decarboxylase activity	molecular_function	0.27043	1	1	2218	2	15506	Cla004597
GO:0010467	gene expression	biological_process	0.27091	1	396	2218	2686	15506	Cla020276,Cla020079,Cla023103,Cla000691,Cla023484,Cla006029,Cla021782,Cla021257,Cla015647,Cla015555,Cla020784,Cla010098,Cla019107,Cla019653,Cla023189,Cla002818,Cla017444,Cla004291,Cla004257,Cla010281,Cla012958,Novel01185,Cla005031,Cla005283,Cla019026,Cla020047,Cla003039,Cla017742,Cla013622,Cla015898,Cla008216,Cla023248,Novel01239,Cla006678,Cla004031,Cla004983,Cla004685,Cla005686,Cla017109,Cla0068…
GO:0044003	modification by symbiont of host morphology or physiology	biological_process	0.27104	1	10	2218	55	15506	Cla004918,Cla010875,Cla010405,Cla009630,Cla016176,Cla019571,Cla010580,Cla017615,Cla019444,Cla007501
GO:0051817	modification of morphology or physiology of other organism involved in symbiotic interaction	biological_process	0.27104	1	10	2218	55	15506	Cla010875,Cla019571,Cla009630,Cla010405,Cla016176,Cla004918,Cla019444,Cla007501,Cla017615,Cla010580
GO:0004853	uroporphyrinogen decarboxylase activity	molecular_function	0.27147	1	1	2218	2	15506	Cla007272
GO:0006259	DNA metabolic process	biological_process	0.27173	1	117	2218	793	15506	Cla005201,Novel00643,Cla012411,Cla021209,Cla017838,Cla004874,Cla015802,Cla013651,Cla003146,Cla020787,Cla005583,Novel00925,Cla008501,Cla001020,Cla004626,Cla008863,Cla017808,Cla001518,Cla008438,Cla001775,Cla009327,Cla016531,Cla011367,Novel01170,Cla009910,Cla000547,Cla008341,Cla019797,Cla000615,Cla014389,Cla020743,Cla008555,Novel00342,Cla017222,Cla017037,Cla004029,Cla023341,Cla008109,Cla012813,Cla01…
GO:0051051	negative regulation of transport	biological_process	0.27185	1	2	2218	8	15506	Novel00838,Novel01240
GO:0030177	positive regulation of Wnt signaling pathway	biological_process	0.2721	1	1	2218	2	15506	Cla003947
GO:0060070	canonical Wnt signaling pathway	biological_process	0.2721	1	1	2218	2	15506	Cla003947
GO:0060828	regulation of canonical Wnt signaling pathway	biological_process	0.2721	1	1	2218	2	15506	Cla003947
GO:0090263	positive regulation of canonical Wnt signaling pathway	biological_process	0.2721	1	1	2218	2	15506	Cla003947
GO:0006771	riboflavin metabolic process	biological_process	0.2721	1	3	2218	13	15506	Cla021407,Cla020047,Cla022008
GO:0009231	riboflavin biosynthetic process	biological_process	0.2721	1	3	2218	13	15506	Cla020047,Cla022008,Cla021407
GO:0042726	flavin-containing compound metabolic process	biological_process	0.2721	1	3	2218	13	15506	Cla022008,Cla020047,Cla021407
GO:0042727	flavin-containing compound biosynthetic process	biological_process	0.2721	1	3	2218	13	15506	Cla021407,Cla020047,Cla022008
GO:0019042	viral latency	biological_process	0.27292	1	1	2218	2	15506	Cla016088
GO:0008173	RNA methyltransferase activity	molecular_function	0.274	1	10	2218	55	15506	Cla014389,Cla004901,Cla003471,Cla021684,Cla010098,Cla020276,Cla022230,Cla016971,Cla006029,Cla016822
GO:0017007	protein-bilin linkage	biological_process	0.27414	1	1	2218	2	15506	Cla002647
GO:0017009	protein-phycocyanobilin linkage	biological_process	0.27414	1	1	2218	2	15506	Cla002647
GO:0004107	chorismate synthase activity	molecular_function	0.2745	1	1	2218	2	15506	Cla013776
GO:0005850	eukaryotic translation initiation factor 2 complex	cellular_component	0.27513	1	1	2218	2	15506	Cla006349
GO:0090544	BAF-type complex	cellular_component	0.27524	1	1	2218	2	15506	Cla001643
GO:0018196	peptidyl-asparagine modification	biological_process	0.27527	1	1	2218	2	15506	Cla010295
GO:0018279	protein N-linked glycosylation via asparagine	biological_process	0.27527	1	1	2218	2	15506	Cla010295
GO:0008406	gonad development	biological_process	0.27528	1	1	2218	2	15506	Cla007846
GO:0045137	development of primary sexual characteristics	biological_process	0.27528	1	1	2218	2	15506	Cla007846
GO:0048608	reproductive structure development	biological_process	0.27528	1	1	2218	2	15506	Cla007846
GO:0061458	reproductive system development	biological_process	0.27528	1	1	2218	2	15506	Cla007846
GO:0051273	beta-glucan metabolic process	biological_process	0.2754	1	10	2218	63	15506	Cla017384,Cla016671,Cla023286,Cla004473,Cla008465,Cla003320,Cla017383,Cla018547,Cla012972,Cla012973
GO:0016051	carbohydrate biosynthetic process	biological_process	0.27563	1	24	2218	155	15506	Cla018547,Cla017383,Cla015692,Cla022170,Cla021734,Cla008465,Novel01098,Cla008123,Cla010205,Cla022499,Cla012972,Cla023084,Cla018918,Cla012973,Cla023286,Cla012748,Cla005675,Cla000181,Cla017384,Cla016861,Cla021407,Cla003320,Cla018595,Cla004473
GO:0006658	phosphatidylserine metabolic process	biological_process	0.27591	1	1	2218	2	15506	Cla020432
GO:0006659	phosphatidylserine biosynthetic process	biological_process	0.27591	1	1	2218	2	15506	Cla020432
GO:0071203	WASH complex	cellular_component	0.2763	1	2	2218	7	15506	Cla021436,Novel00177
GO:0016780	phosphotransferase activity, for other substituted phosphate groups	molecular_function	0.27692	1	3	2218	13	15506	Cla005020,Cla019607,Cla014460
GO:0004019	adenylosuccinate synthase activity	molecular_function	0.27703	1	1	2218	2	15506	Cla008058
GO:0004674	protein serine/threonine kinase activity	molecular_function	0.27707	1	17	2218	108	15506	Cla021717,Cla005858,Cla016945,Cla005119,Cla014854,Cla016690,Cla007709,Cla010280,Cla014475,Cla018253,Cla019404,Novel00652,Cla007745,Cla007908,Cla008122,Cla021134,Cla013415
GO:0000165	MAPK cascade	biological_process	0.27728	1	1	2218	2	15506	Cla011936
GO:0001919	regulation of receptor recycling	biological_process	0.27728	1	1	2218	2	15506	Cla011936
GO:0007040	lysosome organization	biological_process	0.27728	1	1	2218	2	15506	Cla011936
GO:0023014	signal transduction by protein phosphorylation	biological_process	0.27728	1	1	2218	2	15506	Cla011936
GO:0032008	positive regulation of TOR signaling	biological_process	0.27728	1	1	2218	2	15506	Cla011936
GO:0032439	endosome localization	biological_process	0.27728	1	1	2218	2	15506	Cla011936
GO:0042632	cholesterol homeostasis	biological_process	0.27728	1	1	2218	2	15506	Cla011936
GO:0043200	response to amino acid	biological_process	0.27728	1	1	2218	2	15506	Cla011936
GO:0043408	regulation of MAPK cascade	biological_process	0.27728	1	1	2218	2	15506	Cla011936
GO:0043410	positive regulation of MAPK cascade	biological_process	0.27728	1	1	2218	2	15506	Cla011936
GO:0055088	lipid homeostasis	biological_process	0.27728	1	1	2218	2	15506	Cla011936
GO:0055092	sterol homeostasis	biological_process	0.27728	1	1	2218	2	15506	Cla011936
GO:0071230	cellular response to amino acid stimulus	biological_process	0.27728	1	1	2218	2	15506	Cla011936
GO:0071417	cellular response to organonitrogen compound	biological_process	0.27728	1	1	2218	2	15506	Cla011936
GO:0080171	lytic vacuole organization	biological_process	0.27728	1	1	2218	2	15506	Cla011936
GO:1901699	cellular response to nitrogen compound	biological_process	0.27728	1	1	2218	2	15506	Cla011936
GO:1901701	cellular response to oxygen-containing compound	biological_process	0.27728	1	1	2218	2	15506	Cla011936
GO:0031224	intrinsic component of membrane	cellular_component	0.27772	1	251	2218	1705	15506	Cla009946,Cla022977,Cla007212,Cla013096,Cla013941,Cla005020,Cla013328,Cla017050,Cla016718,Cla008231,Cla022628,Cla020464,Novel01030,Cla016644,Cla003928,Cla014409,Cla007461,Novel00455,Cla009157,Cla008222,Cla014389,Cla008434,Cla003334,Cla007739,Cla007600,Cla015697,Cla018940,Cla020955,Cla011902,Cla002353,Cla015484,Cla000194,Cla020517,Cla020214,Cla008975,Cla001657,Cla002060,Cla016818,Cla004848,Cla0224…
GO:0019646	aerobic electron transport chain	biological_process	0.27803	1	1	2218	2	15506	Cla007123
GO:0008537	proteasome activator complex	cellular_component	0.27824	1	1	2218	2	15506	Cla021812
GO:0022624	proteasome accessory complex	cellular_component	0.27824	1	1	2218	2	15506	Cla021812
GO:0004609	phosphatidylserine decarboxylase activity	molecular_function	0.27848	1	1	2218	2	15506	Cla011595
GO:0008990	rRNA (guanine-N2-)-methyltransferase activity	molecular_function	0.27871	1	1	2218	2	15506	Cla003471
GO:0016435	rRNA (guanine) methyltransferase activity	molecular_function	0.27871	1	1	2218	2	15506	Cla003471
GO:0008716	D-alanine-D-alanine ligase activity	molecular_function	0.27897	1	2	2218	8	15506	Cla001455,Cla011995
GO:0009297	pilus assembly	biological_process	0.27948	1	2	2218	7	15506	Cla015809,Cla007689
GO:0043711	pilus organization	biological_process	0.27948	1	2	2218	7	15506	Cla007689,Cla015809
GO:0019013	viral nucleocapsid	cellular_component	0.28058	1	6	2218	31	15506	Cla020875,Cla018891,Cla007641,Cla006400,Cla011151,Cla008341
GO:0004109	coproporphyrinogen oxidase activity	molecular_function	0.28074	1	1	2218	2	15506	Cla005450
GO:0031109	microtubule polymerization or depolymerization	biological_process	0.28119	1	4	2218	20	15506	Cla021734,Cla012454,Cla021046,Cla008037
GO:0031110	regulation of microtubule polymerization or depolymerization	biological_process	0.28119	1	4	2218	20	15506	Cla012454,Cla021734,Cla008037,Cla021046
GO:0004115	3',5'-cyclic-AMP phosphodiesterase activity	molecular_function	0.2815	1	1	2218	2	15506	Cla003262
GO:0006195	purine nucleotide catabolic process	biological_process	0.2815	1	1	2218	2	15506	Cla003262
GO:0006198	cAMP catabolic process	biological_process	0.2815	1	1	2218	2	15506	Cla003262
GO:0009154	purine ribonucleotide catabolic process	biological_process	0.2815	1	1	2218	2	15506	Cla003262
GO:0009214	cyclic nucleotide catabolic process	biological_process	0.2815	1	1	2218	2	15506	Cla003262
GO:0009261	ribonucleotide catabolic process	biological_process	0.2815	1	1	2218	2	15506	Cla003262
GO:0072523	purine-containing compound catabolic process	biological_process	0.2815	1	1	2218	2	15506	Cla003262
GO:0004418	hydroxymethylbilane synthase activity	molecular_function	0.2821	1	1	2218	2	15506	Cla017299
GO:0003877	ATP adenylyltransferase activity	molecular_function	0.28385	1	1	2218	2	15506	Cla007587
GO:0032865	ERMES complex	cellular_component	0.28458	1	1	2218	2	15506	Cla010745
GO:0044232	organelle membrane contact site	cellular_component	0.28458	1	1	2218	2	15506	Cla010745
GO:0044233	ER-mitochondrion membrane contact site	cellular_component	0.28458	1	1	2218	2	15506	Cla010745
GO:0016556	mRNA modification	biological_process	0.28494	1	1	2218	2	15506	Cla020276
GO:0080009	mRNA methylation	biological_process	0.28494	1	1	2218	2	15506	Cla020276
GO:0004407	histone deacetylase activity	molecular_function	0.28505	1	1	2218	2	15506	Cla011799
GO:0006342	chromatin silencing	biological_process	0.28505	1	1	2218	2	15506	Cla011799
GO:0006476	protein deacetylation	biological_process	0.28505	1	1	2218	2	15506	Cla011799
GO:0017136	NAD-dependent histone deacetylase activity	molecular_function	0.28505	1	1	2218	2	15506	Cla011799
GO:0033558	protein deacetylase activity	molecular_function	0.28505	1	1	2218	2	15506	Cla011799
GO:0034979	NAD-dependent protein deacetylase activity	molecular_function	0.28505	1	1	2218	2	15506	Cla011799
GO:0035601	protein deacylation	biological_process	0.28505	1	1	2218	2	15506	Cla011799
GO:0045814	negative regulation of gene expression, epigenetic	biological_process	0.28505	1	1	2218	2	15506	Cla011799
GO:0098732	macromolecule deacylation	biological_process	0.28505	1	1	2218	2	15506	Cla011799
GO:0019438	aromatic compound biosynthetic process	biological_process	0.2851	1	298	2218	2002	15506	Cla014766,Cla006594,Cla015515,Cla019834,Cla019293,Cla010331,Cla014275,Cla008438,Cla019297,Cla001799,Cla017290,Cla005974,Cla020208,Cla011487,Cla011177,Cla020078,Cla019797,Cla020278,Cla021375,Cla017037,Cla009256,Cla015276,Cla012214,Cla005985,Cla011083,Novel00411,Cla017734,Novel00965,Cla023167,Cla019341,Cla012547,Cla014216,Cla008396,Cla002033,Cla018081,Cla008195,Cla016840,Novel00448,Cla017202,Novel0…
GO:0005845	mRNA cap binding complex	cellular_component	0.28527	1	1	2218	2	15506	Cla018976
GO:0034518	RNA cap binding complex	cellular_component	0.28527	1	1	2218	2	15506	Cla018976
GO:0008440	inositol-1,4,5-trisphosphate 3-kinase activity	molecular_function	0.28552	1	1	2218	2	15506	Cla020920
GO:0006189	'de novo' IMP biosynthetic process	biological_process	0.28557	1	1	2218	2	15506	Cla011996
GO:0044215	other organism	cellular_component	0.28574	1	17	2218	103	15506	Cla019444,Cla021147,Cla014344,Novel00933,Cla003300,Cla016088,Cla012513,Cla020047,Cla003947,Cla019304,Cla020053,Cla011429,Novel00317,Cla016001,Cla016176,Cla009282,Cla008294
GO:0044216	other organism cell	cellular_component	0.28574	1	17	2218	103	15506	Cla016001,Cla016176,Cla009282,Cla008294,Cla020053,Cla019304,Cla003947,Cla011429,Novel00317,Cla016088,Cla003300,Cla020047,Cla012513,Cla021147,Cla014344,Cla019444,Novel00933
GO:0044217	other organism part	cellular_component	0.28574	1	17	2218	103	15506	Cla009282,Cla008294,Cla016001,Cla016176,Cla011429,Novel00317,Cla019304,Cla003947,Cla020053,Cla016088,Cla003300,Cla012513,Cla020047,Cla019444,Cla021147,Cla014344,Novel00933
GO:0006808	regulation of nitrogen utilization	biological_process	0.2859	1	1	2218	2	15506	Cla015168
GO:0019740	nitrogen utilization	biological_process	0.2859	1	1	2218	2	15506	Cla015168
GO:0004318	enoyl-[acyl-carrier-protein] reductase (NADH) activity	molecular_function	0.28602	1	1	2218	2	15506	Cla022704
GO:0000313	organellar ribosome	cellular_component	0.28611	1	3	2218	13	15506	Cla021413,Novel00643,Cla023068
GO:0005761	mitochondrial ribosome	cellular_component	0.28611	1	3	2218	13	15506	Cla023068,Novel00643,Cla021413
GO:0009712	catechol-containing compound metabolic process	biological_process	0.28652	1	1	2218	2	15506	Cla010704
GO:0018576	catechol 1,2-dioxygenase activity	molecular_function	0.28652	1	1	2218	2	15506	Cla010704
GO:0018958	phenol-containing compound metabolic process	biological_process	0.28652	1	1	2218	2	15506	Cla010704
GO:0019114	catechol dioxygenase activity	molecular_function	0.28652	1	1	2218	2	15506	Cla010704
GO:0031532	actin cytoskeleton reorganization	biological_process	0.28661	1	1	2218	2	15506	Cla021916
GO:0051181	cofactor transport	biological_process	0.28676	1	3	2218	13	15506	Cla001593,Cla021806,Cla007824
GO:0051648	vesicle localization	biological_process	0.28705	1	1	2218	2	15506	Cla009901
GO:0051650	establishment of vesicle localization	biological_process	0.28705	1	1	2218	2	15506	Cla009901
GO:0015291	secondary active transmembrane transporter activity	molecular_function	0.28787	1	17	2218	106	15506	Cla020435,Cla004949,Cla016600,Cla015240,Cla011528,Cla021250,Cla007212,Cla015755,Cla015484,Cla006870,Cla000731,Cla019527,Cla012949,Cla014122,Cla001746,Cla016601,Cla003275
GO:0019900	kinase binding	molecular_function	0.28851	1	5	2218	25	15506	Cla003533,Cla022469,Cla006594,Cla007623,Cla013730
GO:0004879	RNA polymerase II transcription factor activity, ligand-activated sequence-specific DNA binding	molecular_function	0.28873	1	2	2218	7	15506	Novel00411,Cla010793
GO:0004882	androgen receptor activity	molecular_function	0.28873	1	2	2218	7	15506	Novel00411,Cla010793
GO:0030521	androgen receptor signaling pathway	biological_process	0.28873	1	2	2218	7	15506	Novel00411,Cla010793
GO:0098531	transcription factor activity, direct ligand regulated sequence-specific DNA binding	molecular_function	0.28873	1	2	2218	7	15506	Novel00411,Cla010793
GO:0030126	COPI vesicle coat	cellular_component	0.29162	1	2	2218	9	15506	Cla016554,Cla012569
GO:0030137	COPI-coated vesicle	cellular_component	0.29162	1	2	2218	9	15506	Cla016554,Cla012569
GO:0030663	COPI-coated vesicle membrane	cellular_component	0.29162	1	2	2218	9	15506	Cla012569,Cla016554
GO:0003896	DNA primase activity	molecular_function	0.29226	1	4	2218	20	15506	Cla012411,Cla019316,Cla021436,Cla001518
GO:0004348	glucosylceramidase activity	molecular_function	0.29369	1	1	2218	3	15506	Cla012454
GO:0009147	pyrimidine nucleoside triphosphate metabolic process	biological_process	0.29485	1	2	2218	7	15506	Cla022500,Novel01082
GO:0003995	acyl-CoA dehydrogenase activity	molecular_function	0.29605	1	2	2218	8	15506	Cla003665,Cla018002
GO:0000725	recombinational repair	biological_process	0.2961	1	2	2218	8	15506	Cla007709,Cla019611
GO:0042398	cellular modified amino acid biosynthetic process	biological_process	0.29758	1	8	2218	44	15506	Cla003989,Cla017814,Cla020432,Cla016386,Cla014068,Cla010547,Cla021251,Cla004284
GO:0005984	disaccharide metabolic process	biological_process	0.29775	1	6	2218	34	15506	Cla011369,Cla011371,Cla005675,Cla008123,Cla011131,Cla018918
GO:0015926	glucosidase activity	molecular_function	0.29809	1	2	2218	8	15506	Cla011218,Cla016555
GO:0042440	pigment metabolic process	biological_process	0.29847	1	24	2218	147	15506	Cla018433,Cla023248,Cla011810,Cla020476,Cla016861,Cla004284,Cla010253,Cla004245,Cla002517,Cla002033,Cla007434,Cla008210,Cla010547,Cla022670,Cla001251,Cla017396,Cla022442,Cla019109,Cla010255,Cla002818,Cla015621,Cla016840,Cla010898,Cla005283
GO:0000990	transcription factor activity, core RNA polymerase binding	molecular_function	0.29894	1	5	2218	26	15506	Cla013328,Cla006786,Cla006978,Cla008396,Cla009215
GO:0000996	core DNA-dependent RNA polymerase binding promoter specificity activity	molecular_function	0.29894	1	5	2218	26	15506	Cla006786,Cla008396,Cla006978,Cla009215,Cla013328
GO:0016987	sigma factor activity	molecular_function	0.29894	1	5	2218	26	15506	Cla013328,Cla006978,Cla008396,Cla006786,Cla009215
GO:0051346	negative regulation of hydrolase activity	biological_process	0.29921	1	3	2218	13	15506	Cla013688,Cla008692,Cla011084
GO:0014070	response to organic cyclic compound	biological_process	0.29954	1	2	2218	8	15506	Cla010171,Cla019293
GO:0006298	mismatch repair	biological_process	0.30006	1	5	2218	27	15506	Cla017037,Cla000615,Cla012753,Cla019498,Cla006188
GO:0006612	protein targeting to membrane	biological_process	0.30052	1	9	2218	52	15506	Cla007370,Cla005583,Cla021256,Cla022698,Cla007369,Cla023201,Cla019070,Novel00643,Cla020551
GO:0016108	tetraterpenoid metabolic process	biological_process	0.30159	1	10	2218	58	15506	Cla011810,Cla023248,Cla020476,Cla019109,Cla001251,Cla005283,Cla016840,Cla010898,Cla015621,Cla002818
GO:0016109	tetraterpenoid biosynthetic process	biological_process	0.30159	1	10	2218	58	15506	Cla002818,Cla015621,Cla005283,Cla010898,Cla016840,Cla019109,Cla001251,Cla023248,Cla011810,Cla020476
GO:0016116	carotenoid metabolic process	biological_process	0.30159	1	10	2218	58	15506	Cla019109,Cla001251,Cla023248,Cla020476,Cla011810,Cla015621,Cla002818,Cla005283,Cla016840,Cla010898
GO:0016117	carotenoid biosynthetic process	biological_process	0.30159	1	10	2218	58	15506	Cla019109,Cla001251,Cla023248,Cla011810,Cla020476,Cla015621,Cla002818,Cla005283,Cla010898,Cla016840
GO:0022892	substrate-specific transporter activity	molecular_function	0.3018	1	118	2218	800	15506	Novel00571,Cla008897,Cla022868,Cla005619,Cla015497,Cla021131,Cla021405,Cla023166,Novel00841,Cla004473,Cla006484,Cla010562,Cla015238,Cla018888,Cla019527,Cla022844,Cla009088,Cla020867,Cla015211,Cla022235,Cla021378,Novel01304,Cla016840,Cla015490,Cla014150,Cla012810,Cla000525,Novel01098,Cla021367,Cla022292,Cla008029,Cla017266,Cla005926,Cla003005,Cla019971,Cla003303,Cla023225,Cla016926,Cla010691,Cla01…
GO:0000087	mitotic M phase	biological_process	0.30186	1	3	2218	13	15506	Cla021734,Cla021046,Cla011058
GO:0098763	mitotic cell cycle phase	biological_process	0.30186	1	3	2218	13	15506	Cla021734,Cla021046,Cla011058
GO:0003950	NAD+ ADP-ribosyltransferase activity	molecular_function	0.30255	1	3	2218	14	15506	Cla022185,Cla005994,Cla000974
GO:0006081	cellular aldehyde metabolic process	biological_process	0.30277	1	4	2218	19	15506	Cla017988,Cla002601,Cla015963,Cla010932
GO:0005654	nucleoplasm	cellular_component	0.30435	1	26	2218	162	15506	Cla009215,Cla000786,Cla002332,Cla006484,Cla006812,Cla008341,Cla010693,Cla023338,Cla020551,Cla007265,Cla013328,Cla004685,Cla007837,Cla023189,Cla017661,Cla002370,Cla017877,Cla008205,Cla021247,Cla018570,Cla014150,Cla021209,Cla017037,Cla018574,Cla014389,Cla014028
GO:0044451	nucleoplasm part	cellular_component	0.30435	1	26	2218	162	15506	Cla007265,Cla013328,Cla004685,Cla023338,Cla020551,Cla002332,Cla006484,Cla006812,Cla008341,Cla010693,Cla000786,Cla009215,Cla021209,Cla017037,Cla018574,Cla014389,Cla014028,Cla021247,Cla018570,Cla014150,Cla008205,Cla023189,Cla007837,Cla017661,Cla002370,Cla017877
GO:0000105	histidine biosynthetic process	biological_process	0.30645	1	6	2218	31	15506	Novel01117,Cla009410,Cla008809,Cla017273,Cla017988,Cla009782
GO:0006547	histidine metabolic process	biological_process	0.30645	1	6	2218	31	15506	Novel01117,Cla017273,Cla008809,Cla009410,Cla017988,Cla009782
GO:0052803	imidazole-containing compound metabolic process	biological_process	0.30645	1	6	2218	31	15506	Novel01117,Cla017273,Cla008809,Cla009410,Cla009782,Cla017988
GO:0019915	lipid storage	biological_process	0.30723	1	2	2218	8	15506	Cla007737,Cla018469
GO:0036459	ubiquitinyl hydrolase activity	molecular_function	0.30989	1	5	2218	29	15506	Cla015597,Cla005612,Cla015598,Cla005407,Cla021416
GO:0000184	nuclear-transcribed mRNA catabolic process, nonsense-mediated decay	biological_process	0.31012	1	2	2218	9	15506	Cla018469,Cla010280
GO:0000956	nuclear-transcribed mRNA catabolic process	biological_process	0.31012	1	2	2218	9	15506	Cla018469,Cla010280
GO:0009967	positive regulation of signal transduction	biological_process	0.31076	1	5	2218	26	15506	Cla009301,Cla020604,Cla013877,Cla003947,Cla011936
GO:0010647	positive regulation of cell communication	biological_process	0.31076	1	5	2218	26	15506	Cla020604,Cla009301,Cla013877,Cla003947,Cla011936
GO:0023056	positive regulation of signaling	biological_process	0.31076	1	5	2218	26	15506	Cla013877,Cla020604,Cla009301,Cla003947,Cla011936
GO:0097196	Shu complex	cellular_component	0.31274	1	1	2218	3	15506	Cla007709
GO:1990391	DNA repair complex	cellular_component	0.31274	1	1	2218	3	15506	Cla007709
GO:0006826	iron ion transport	biological_process	0.31454	1	13	2218	79	15506	Cla019977,Cla008897,Cla001020,Cla009946,Cla009157,Cla021367,Cla022628,Cla012810,Cla010071,Cla022844,Cla020249,Cla011094,Cla016137
GO:0007548	sex differentiation	biological_process	0.31599	1	2	2218	8	15506	Cla011409,Cla007846
GO:0006024	glycosaminoglycan biosynthetic process	biological_process	0.31805	1	2	2218	8	15506	Cla020517,Cla018056
GO:0009628	response to abiotic stimulus	biological_process	0.31873	1	4	2218	20	15506	Cla021949,Cla008125,Cla000735,Cla021379
GO:0019072	viral genome packaging	biological_process	0.319	1	2	2218	8	15506	Cla000543,Cla020053
GO:0017119	Golgi transport complex	cellular_component	0.31916	1	5	2218	27	15506	Cla017615,Cla006271,Cla005761,Cla014746,Cla023465
GO:0016702	oxidoreductase activity, acting on single donors with incorporation of molecular oxygen, incorporation of two atoms of oxygen	molecular_function	0.3197	1	10	2218	60	15506	Cla005980,Cla012112,Novel00273,Cla002093,Cla010704,Cla017021,Cla021593,Cla020963,Cla022107,Cla008324
GO:0033646	host intracellular part	cellular_component	0.31976	1	13	2218	78	15506	Cla009282,Cla008294,Cla003300,Cla016001,Cla020047,Cla016176,Cla011429,Novel00317,Cla003947,Cla021147,Cla020053,Cla019304,Cla019444
GO:0043656	intracellular region of host	cellular_component	0.31976	1	13	2218	78	15506	Cla020053,Cla021147,Cla003947,Cla019304,Cla019444,Cla011429,Novel00317,Cla016001,Cla003300,Cla020047,Cla016176,Cla009282,Cla008294
GO:0030203	glycosaminoglycan metabolic process	biological_process	0.31981	1	3	2218	14	15506	Cla018056,Cla015515,Cla020517
GO:0003747	translation release factor activity	molecular_function	0.32023	1	3	2218	14	15506	Cla005690,Cla018955,Cla019797
GO:0008079	translation termination factor activity	molecular_function	0.32023	1	3	2218	14	15506	Cla019797,Cla005690,Cla018955
GO:0019898	extrinsic component of membrane	cellular_component	0.32202	1	10	2218	56	15506	Cla004704,Cla010961,Cla007696,Cla007831,Cla015233,Cla004222,Cla020164,Cla004698,Cla022278,Cla004703
GO:0008811	chloramphenicol O-acetyltransferase activity	molecular_function	0.32222	1	1	2218	3	15506	Cla007727
GO:0006575	cellular modified amino acid metabolic process	biological_process	0.32496	1	10	2218	58	15506	Cla014176,Cla003989,Cla020432,Cla016041,Cla017814,Cla014068,Cla016386,Cla010547,Cla021251,Cla004284
GO:0030983	mismatched DNA binding	molecular_function	0.32606	1	4	2218	22	15506	Cla006188,Cla019498,Cla017037,Cla012753
GO:0006221	pyrimidine nucleotide biosynthetic process	biological_process	0.32644	1	3	2218	14	15506	Cla016577,Cla005471,Cla009301
GO:0044218	other organism cell membrane	cellular_component	0.32646	1	5	2218	28	15506	Cla014344,Cla019444,Cla016088,Cla012513,Novel00933
GO:0044279	other organism membrane	cellular_component	0.32646	1	5	2218	28	15506	Novel00933,Cla012513,Cla016088,Cla019444,Cla014344
GO:0004499	N,N-dimethylaniline monooxygenase activity	molecular_function	0.32669	1	5	2218	26	15506	Cla005671,Cla004245,Cla006886,Cla006885,Cla011132
GO:0016741	transferase activity, transferring one-carbon groups	molecular_function	0.32713	1	51	2218	334	15506	Cla020276,Cla010664,Cla018460,Cla016577,Cla017148,Cla006797,Cla023413,Cla006029,Cla013606,Novel00587,Cla007590,Cla022972,Cla016977,Cla009165,Cla012201,Cla006473,Cla010098,Cla022230,Cla005332,Cla021262,Cla014389,Cla004242,Cla008222,Cla004567,Cla022974,Cla020761,Cla010643,Cla021684,Cla000547,Cla015641,Cla017759,Cla013499,Cla016971,Cla002060,Cla011228,Cla014889,Cla002903,Cla006932,Cla020517,Cla02333…
GO:0005047	signal recognition particle binding	molecular_function	0.32728	1	2	2218	8	15506	Cla007369,Cla007370
GO:0006790	sulfur compound metabolic process	biological_process	0.32759	1	12	2218	74	15506	Cla014176,Cla017814,Cla002903,Cla020517,Cla017149,Cla009782,Cla008501,Cla008324,Cla017148,Cla011367,Cla021256,Cla010611
GO:0004176	ATP-dependent peptidase activity	molecular_function	0.32839	1	2	2218	9	15506	Cla020799,Cla009889
GO:0042597	periplasmic space	cellular_component	0.32842	1	3	2218	14	15506	Cla022333,Cla021816,Cla012201
GO:0009061	anaerobic respiration	biological_process	0.32941	1	5	2218	28	15506	Cla004332,Cla006797,Cla015641,Cla008389,Cla012753
GO:0015948	methanogenesis	biological_process	0.32941	1	5	2218	28	15506	Cla012753,Cla008389,Cla015641,Cla006797,Cla004332
GO:0015975	energy derivation by oxidation of reduced inorganic compounds	biological_process	0.32941	1	5	2218	28	15506	Cla008389,Cla012753,Cla015641,Cla004332,Cla006797
GO:0043447	alkane biosynthetic process	biological_process	0.32941	1	5	2218	28	15506	Cla006797,Cla004332,Cla015641,Cla012753,Cla008389
GO:0003972	RNA ligase (ATP) activity	molecular_function	0.32949	1	1	2218	3	15506	Cla005050
GO:0035091	phosphatidylinositol binding	molecular_function	0.32982	1	3	2218	15	15506	Cla009281,Cla018409,Cla023002
GO:0009069	serine family amino acid metabolic process	biological_process	0.33014	1	3	2218	14	15506	Cla021934,Cla008324,Cla016577
GO:0004829	threonine-tRNA ligase activity	molecular_function	0.33116	1	1	2218	3	15506	Novel01170
GO:0043022	ribosome binding	molecular_function	0.3335	1	2	2218	8	15506	Cla007833,Cla010217
GO:0009982	pseudouridine synthase activity	molecular_function	0.33362	1	4	2218	20	15506	Cla007409,Cla019299,Cla013749,Cla022928
GO:0016861	intramolecular oxidoreductase activity, interconverting aldoses and ketoses	molecular_function	0.33383	1	5	2218	26	15506	Cla016115,Cla022499,Cla022170,Cla019106,Cla013309
GO:0005746	mitochondrial respiratory chain	cellular_component	0.33424	1	4	2218	20	15506	Cla001181,Cla020955,Cla011555,Cla017692
GO:0008725	DNA-3-methyladenine glycosylase activity	molecular_function	0.33431	1	2	2218	8	15506	Cla020743,Cla015323
GO:0043733	DNA-3-methylbase glycosylase activity	molecular_function	0.33431	1	2	2218	8	15506	Cla015323,Cla020743
GO:0006621	protein retention in ER lumen	biological_process	0.33476	1	2	2218	8	15506	Cla010537,Novel01030
GO:0035437	maintenance of protein localization in endoplasmic reticulum	biological_process	0.33476	1	2	2218	8	15506	Cla010537,Novel01030
GO:0046923	ER retention sequence binding	molecular_function	0.33476	1	2	2218	8	15506	Cla010537,Novel01030
GO:0072595	maintenance of protein localization in organelle	biological_process	0.33476	1	2	2218	8	15506	Novel01030,Cla010537
GO:0032780	negative regulation of ATPase activity	biological_process	0.3375	1	2	2218	8	15506	Cla011084,Cla013688
GO:0043462	regulation of ATPase activity	biological_process	0.3375	1	2	2218	8	15506	Cla011084,Cla013688
GO:0004455	ketol-acid reductoisomerase activity	molecular_function	0.33842	1	1	2218	3	15506	Cla016264
GO:0045595	regulation of cell differentiation	biological_process	0.33875	1	1	2218	3	15506	Cla009901
GO:0016849	phosphorus-oxygen lyase activity	molecular_function	0.33955	1	2	2218	9	15506	Cla014654,Cla005133
GO:0043170	macromolecule metabolic process	biological_process	0.33983	1	728	2218	5097	15506	Cla023280,Cla009059,Cla001476,Cla023286,Cla020366,Cla012773,Cla017212,Cla022879,Cla012758,Cla010693,Cla013973,Cla006812,Cla010439,Cla004063,Cla017383,Cla021742,Cla008434,Cla007407,Cla014389,Cla003070,Cla003535,Cla005549,Cla017396,Cla005945,Cla007969,Cla017600,Cla023264,Cla018293,Cla015725,Novel00317,Cla007424,Cla017099,Cla019837,Cla004613,Cla010678,Cla001216,Cla005583,Cla021806,Cla010071,Novel006…
GO:0016831	carboxy-lyase activity	molecular_function	0.34122	1	13	2218	80	15506	Cla011595,Cla017988,Cla008439,Cla007272,Cla001514,Novel00571,Cla023084,Cla004597,Cla002648,Cla016791,Cla000142,Cla002312,Novel00841
GO:0051539	4 iron, 4 sulfur cluster binding	molecular_function	0.34164	1	3	2218	15	15506	Cla010851,Cla011342,Cla002376
GO:0004013	adenosylhomocysteinase activity	molecular_function	0.34375	1	1	2218	3	15506	Cla010547
GO:0016801	hydrolase activity, acting on ether bonds	molecular_function	0.34375	1	1	2218	3	15506	Cla010547
GO:0016802	trialkylsulfonium hydrolase activity	molecular_function	0.34375	1	1	2218	3	15506	Cla010547
GO:0005681	spliceosomal complex	cellular_component	0.34466	1	7	2218	39	15506	Cla016436,Cla020056,Cla012958,Cla009059,Cla022397,Cla001799,Cla022051
GO:0030030	cell projection organization	biological_process	0.34561	1	7	2218	40	15506	Cla004345,Cla013650,Cla020276,Cla018240,Cla007689,Cla015809,Cla012513
GO:0019685	photosynthesis, dark reaction	biological_process	0.34585	1	1	2218	3	15506	Cla016861
GO:0051297	centrosome organization	biological_process	0.34593	1	1	2218	3	15506	Cla012513
GO:0005267	potassium channel activity	molecular_function	0.34662	1	5	2218	28	15506	Cla020293,Novel01071,Cla009747,Cla001947,Cla010691
GO:0015662	ATPase activity, coupled to transmembrane movement of ions, phosphorylative mechanism	molecular_function	0.34756	1	1	2218	3	15506	Cla005619
GO:0005343	organic acid:sodium symporter activity	molecular_function	0.34827	1	1	2218	3	15506	Cla019527
GO:0015296	anion:cation symporter activity	molecular_function	0.34827	1	1	2218	3	15506	Cla019527
GO:0019058	viral life cycle	biological_process	0.3486	1	25	2218	163	15506	Cla018885,Cla008692,Cla010650,Cla004874,Cla021997,Cla003535,Cla012513,Cla010405,Cla000543,Cla005201,Cla004278,Cla019919,Cla012284,Cla020455,Cla018866,Cla020053,Cla017808,Cla004685,Cla002350,Cla016736,Cla009282,Cla019571,Cla009630,Cla008720,Cla018314
GO:0017016	Ras GTPase binding	molecular_function	0.34879	1	5	2218	31	15506	Cla022906,Cla016001,Cla021147,Cla002033,Cla009213
GO:0031267	small GTPase binding	molecular_function	0.34879	1	5	2218	31	15506	Cla016001,Cla002033,Cla021147,Cla022906,Cla009213
GO:0051020	GTPase binding	molecular_function	0.34879	1	5	2218	31	15506	Cla002033,Cla021147,Cla016001,Cla022906,Cla009213
GO:0005381	iron ion transmembrane transporter activity	molecular_function	0.34888	1	13	2218	81	15506	Cla019977,Cla008897,Cla009157,Cla001020,Cla009946,Cla010071,Cla012810,Cla021367,Cla022628,Cla016137,Cla011094,Cla022844,Cla020249
GO:0030518	intracellular steroid hormone receptor signaling pathway	biological_process	0.35043	1	2	2218	8	15506	Novel00411,Cla010793
GO:0030522	intracellular receptor signaling pathway	biological_process	0.35043	1	2	2218	8	15506	Novel00411,Cla010793
GO:0008484	sulfuric ester hydrolase activity	molecular_function	0.35091	1	1	2218	3	15506	Cla019529
GO:0048513	organ development	biological_process	0.35169	1	2	2218	9	15506	Cla007846,Cla015270
GO:1901618	organic hydroxy compound transmembrane transporter activity	molecular_function	0.35172	1	1	2218	3	15506	Cla019444
GO:0033643	host cell part	cellular_component	0.35214	1	16	2218	101	15506	Cla020047,Cla012513,Cla003300,Cla016088,Cla021147,Cla014344,Cla019444,Cla008294,Cla009282,Cla016176,Cla016001,Novel00317,Cla011429,Cla003947,Cla019304,Cla020053
GO:0003883	CTP synthase activity	molecular_function	0.35301	1	1	2218	3	15506	Cla005471
GO:0055036	virion membrane	cellular_component	0.35482	1	2	2218	9	15506	Cla014344,Cla013919
GO:0008430	selenium binding	molecular_function	0.35536	1	1	2218	3	15506	Cla007676
GO:0004100	chitin synthase activity	molecular_function	0.3555	1	1	2218	3	15506	Novel00689
GO:0016854	racemase and epimerase activity	molecular_function	0.35592	1	5	2218	27	15506	Cla014751,Cla017988,Cla018056,Novel01098,Cla018594
GO:0016197	endosomal transport	biological_process	0.35639	1	2	2218	9	15506	Cla019611,Cla009901
GO:0001934	positive regulation of protein phosphorylation	biological_process	0.35703	1	1	2218	3	15506	Cla011936
GO:0042327	positive regulation of phosphorylation	biological_process	0.35703	1	1	2218	3	15506	Cla011936
GO:0006959	humoral immune response	biological_process	0.35737	1	1	2218	3	15506	Cla003276
GO:0042381	hemolymph coagulation	biological_process	0.35737	1	1	2218	3	15506	Cla003276
GO:0015988	energy coupled proton transmembrane transport, against electrochemical gradient	biological_process	0.35754	1	15	2218	94	15506	Cla018195,Cla014100,Cla013992,Cla019797,Cla022292,Cla015019,Novel01304,Cla007613,Cla023166,Cla002271,Cla019297,Cla009088,Cla019529,Cla014389,Cla022440
GO:0015991	ATP hydrolysis coupled proton transport	biological_process	0.35754	1	15	2218	94	15506	Cla009088,Cla019297,Cla002271,Cla022440,Cla014389,Cla019529,Novel01304,Cla015019,Cla023166,Cla007613,Cla019797,Cla014100,Cla013992,Cla022292,Cla018195
GO:0008918	lipopolysaccharide 3-alpha-galactosyltransferase activity	molecular_function	0.35853	1	1	2218	3	15506	Cla012748
GO:0035250	UDP-galactosyltransferase activity	molecular_function	0.35853	1	1	2218	3	15506	Cla012748
GO:0004197	cysteine-type endopeptidase activity	molecular_function	0.35911	1	9	2218	54	15506	Cla022806,Cla012972,Cla010439,Cla016594,Cla004470,Cla004245,Cla011553,Cla004657,Novel00266
GO:0004655	porphobilinogen synthase activity	molecular_function	0.35921	1	1	2218	3	15506	Cla011998
GO:0003872	6-phosphofructokinase activity	molecular_function	0.35937	1	2	2218	9	15506	Cla014418,Cla004847
GO:0046527	glucosyltransferase activity	molecular_function	0.35964	1	11	2218	76	15506	Cla017384,Cla023286,Cla004473,Cla011131,Cla003320,Cla018210,Cla008465,Cla017383,Cla012972,Cla012973,Cla009165
GO:0018130	heterocycle biosynthetic process	biological_process	0.36015	1	297	2218	2017	15506	Cla014766,Cla015515,Cla006594,Cla019834,Cla019293,Cla010331,Cla014275,Cla017290,Cla020208,Cla005974,Cla008438,Cla019297,Cla001799,Cla020078,Cla011487,Cla011177,Cla019797,Cla021375,Cla020278,Cla017037,Cla009256,Cla011083,Cla015276,Cla012214,Cla005985,Cla017734,Novel00411,Cla023167,Novel00965,Cla019341,Cla012547,Cla002033,Cla014216,Cla021256,Cla008396,Cla008195,Cla018081,Novel00878,Cla014150,Cla017…
GO:0016743	carboxyl- or carbamoyltransferase activity	molecular_function	0.36043	1	1	2218	3	15506	Cla005332
GO:0004814	arginine-tRNA ligase activity	molecular_function	0.36051	1	1	2218	3	15506	Cla006584
GO:0006420	arginyl-tRNA aminoacylation	biological_process	0.36051	1	1	2218	3	15506	Cla006584
GO:0006890	retrograde vesicle-mediated transport, Golgi to ER	biological_process	0.36127	1	1	2218	3	15506	Cla004745
GO:0043226	organelle	cellular_component	0.36165	1	382	2218	2602	15506	Cla002093,Cla017099,Novel00643,Cla020337,Cla018660,Cla006976,Cla005583,Novel00652,Cla003249,Cla005606,Cla006926,Cla006465,Cla019380,Cla017600,Cla019591,Cla022818,Cla003665,Cla004837,Cla016347,Cla005945,Cla011902,Cla023465,Cla008341,Cla004702,Cla023264,Cla000786,Cla018293,Cla004848,Cla014389,Cla004063,Cla017927,Cla020955,Cla013992,Cla017063,Cla001643,Cla020056,Cla002793,Cla009165,Cla015108,Cla0083…
GO:0050804	modulation of synaptic transmission	biological_process	0.36209	1	1	2218	3	15506	Novel01240
GO:0030420	establishment of competence for transformation	biological_process	0.3624	1	1	2218	3	15506	Cla020286
GO:0003714	transcription corepressor activity	molecular_function	0.3627	1	1	2218	3	15506	Cla019341
GO:0055085	transmembrane transport	biological_process	0.36368	1	122	2218	846	15506	Cla008580,Cla007613,Cla020164,Cla004074,Cla005292,Cla015240,Novel00471,Cla016600,Cla009815,Cla002271,Cla013092,Cla011011,Cla009044,Cla018169,Cla019529,Cla010745,Cla002648,Cla012949,Cla006870,Cla000731,Cla016601,Cla003275,Cla001115,Cla020122,Cla010146,Cla001746,Cla003667,Cla008887,Cla015490,Cla021378,Novel01304,Cla016840,Cla004220,Cla020435,Cla015211,Cla009088,Cla009816,Cla019971,Cla003303,Cla0232…
GO:0009129	pyrimidine nucleoside monophosphate metabolic process	biological_process	0.36414	1	1	2218	3	15506	Cla016577
GO:0009130	pyrimidine nucleoside monophosphate biosynthetic process	biological_process	0.36414	1	1	2218	3	15506	Cla016577
GO:0009157	deoxyribonucleoside monophosphate biosynthetic process	biological_process	0.36414	1	1	2218	3	15506	Cla016577
GO:0009162	deoxyribonucleoside monophosphate metabolic process	biological_process	0.36414	1	1	2218	3	15506	Cla016577
GO:0009176	pyrimidine deoxyribonucleoside monophosphate metabolic process	biological_process	0.36414	1	1	2218	3	15506	Cla016577
GO:0009177	pyrimidine deoxyribonucleoside monophosphate biosynthetic process	biological_process	0.36414	1	1	2218	3	15506	Cla016577
GO:0009221	pyrimidine deoxyribonucleotide biosynthetic process	biological_process	0.36414	1	1	2218	3	15506	Cla016577
GO:0009263	deoxyribonucleotide biosynthetic process	biological_process	0.36414	1	1	2218	3	15506	Cla016577
GO:0009265	2'-deoxyribonucleotide biosynthetic process	biological_process	0.36414	1	1	2218	3	15506	Cla016577
GO:0046385	deoxyribose phosphate biosynthetic process	biological_process	0.36414	1	1	2218	3	15506	Cla016577
GO:0016593	Cdc73/Paf1 complex	cellular_component	0.3647	1	3	2218	15	15506	Cla018574,Cla014389,Cla021209
GO:0019015	viral genome	cellular_component	0.36474	1	1	2218	3	15506	Cla014295
GO:0019238	cyclohydrolase activity	molecular_function	0.36507	1	2	2218	9	15506	Cla023338,Novel01117
GO:0035299	inositol pentakisphosphate 2-kinase activity	molecular_function	0.36543	1	1	2218	3	15506	Cla020786
GO:0009615	response to virus	biological_process	0.36566	1	6	2218	35	15506	Cla020079,Cla019297,Cla009478,Cla019444,Cla020820,Cla017109
GO:0008455	alpha-1,6-mannosylglycoprotein 2-beta-N-acetylglucosaminyltransferase activity	molecular_function	0.36566	1	1	2218	3	15506	Cla015692
GO:0008083	growth factor activity	molecular_function	0.36596	1	4	2218	21	15506	Cla007846,Cla013324,Cla021390,Cla014048
GO:0022857	transmembrane transporter activity	molecular_function	0.36652	1	140	2218	978	15506	Cla019834,Cla007674,Cla004949,Cla012411,Cla014452,Cla020293,Cla005130,Cla022678,Cla019297,Cla008218,Cla019977,Cla001020,Cla021250,Cla019797,Cla020249,Cla011094,Cla003644,Cla017037,Cla020816,Cla003221,Cla012011,Cla003774,Cla019444,Cla018195,Cla017215,Novel01194,Novel00965,Cla019612,Cla008210,Cla009108,Cla009747,Cla015527,Cla014122,Cla015211,Cla014150,Cla015490,Novel01304,Cla016840,Cla021378,Cla004…
GO:0015977	carbon fixation	biological_process	0.36672	1	2	2218	9	15506	Cla000142,Cla002312
GO:0070469	respiratory chain	cellular_component	0.36698	1	4	2218	21	15506	Cla020955,Cla011555,Cla001181,Cla017692
GO:0030111	regulation of Wnt signaling pathway	biological_process	0.36855	1	1	2218	3	15506	Cla003947
GO:0031984	organelle subcompartment	cellular_component	0.36867	1	2	2218	9	15506	Cla015692,Cla016465
GO:0098791	Golgi subcompartment	cellular_component	0.36867	1	2	2218	9	15506	Cla015692,Cla016465
GO:0018995	host	cellular_component	0.36892	1	16	2218	102	15506	Cla021147,Cla014344,Cla019444,Cla016088,Cla003300,Cla020047,Cla012513,Cla011429,Novel00317,Cla019304,Cla020053,Cla003947,Cla009282,Cla008294,Cla016001,Cla016176
GO:0043657	host cell	cellular_component	0.36892	1	16	2218	102	15506	Cla016176,Cla016001,Cla008294,Cla009282,Cla003947,Cla019304,Cla020053,Novel00317,Cla011429,Cla012513,Cla020047,Cla016088,Cla003300,Cla019444,Cla021147,Cla014344
GO:0051274	beta-glucan biosynthetic process	biological_process	0.36899	1	9	2218	61	15506	Cla012972,Cla018547,Cla017383,Cla012973,Cla023286,Cla017384,Cla003320,Cla008465,Cla004473
GO:0000287	magnesium ion binding	molecular_function	0.36912	1	16	2218	101	15506	Cla003122,Cla018362,Cla010377,Cla018367,Cla019014,Cla018361,Cla004216,Cla008191,Cla012942,Cla006735,Cla008781,Cla012928,Cla019056,Cla007779,Cla022882,Cla014222
GO:0019901	protein kinase binding	molecular_function	0.36947	1	4	2218	21	15506	Cla003533,Cla022469,Cla006594,Cla013730
GO:0043229	intracellular organelle	cellular_component	0.36981	1	376	2218	2562	15506	Cla022868,Cla013766,Cla014905,Cla006484,Cla008387,Cla016436,Cla022278,Cla006791,Cla020558,Cla017450,Cla000667,Cla008205,Cla009094,Cla021845,Cla007837,Cla003005,Cla019971,Cla013971,Cla009062,Cla008070,Cla011011,Cla014815,Cla008113,Cla010413,Cla021078,Cla022076,Cla003667,Cla018666,Cla006870,Cla021795,Cla003600,Cla014433,Cla016465,Cla003999,Cla011936,Novel00471,Cla004317,Cla000813,Cla013678,Cla01919…
GO:0016755	transferase activity, transferring amino-acyl groups	molecular_function	0.37075	1	3	2218	16	15506	Cla014176,Cla006584,Cla015127
GO:0016311	dephosphorylation	biological_process	0.37081	1	6	2218	35	15506	Cla013695,Cla009377,Cla011058,Cla010030,Cla005570,Cla013973
GO:0000041	transition metal ion transport	biological_process	0.37082	1	17	2218	109	15506	Cla022844,Cla020249,Cla011094,Cla022628,Cla001020,Cla009946,Cla019977,Cla008897,Novel01194,Cla016137,Cla012810,Cla010071,Cla021367,Cla012011,Cla015466,Cla009157,Cla015211
GO:0051235	maintenance of location	biological_process	0.3709	1	4	2218	22	15506	Cla007737,Cla010537,Cla018469,Novel01030
GO:0004645	phosphorylase activity	molecular_function	0.37227	1	1	2218	4	15506	Cla001469
GO:0008184	glycogen phosphorylase activity	molecular_function	0.37227	1	1	2218	4	15506	Cla001469
GO:0015995	chlorophyll biosynthetic process	biological_process	0.37232	1	2	2218	9	15506	Cla016861,Cla008210
GO:0005134	interleukin-2 receptor binding	molecular_function	0.37278	1	1	2218	3	15506	Cla014048
GO:0033178	proton-transporting two-sector ATPase complex, catalytic domain	cellular_component	0.37279	1	7	2218	43	15506	Cla013992,Cla009088,Cla019380,Cla014452,Cla015497,Cla021378,Cla018195
GO:0046700	heterocycle catabolic process	biological_process	0.37302	1	14	2218	86	15506	Cla018240,Cla010255,Cla016041,Cla010280,Cla022442,Cla000199,Cla018433,Cla018469,Cla017396,Cla011125,Cla014185,Cla010434,Cla010253,Cla003262
GO:0038023	signaling receptor activity	molecular_function	0.37396	1	20	2218	138	15506	Cla004473,Cla009747,Cla020286,Cla010793,Cla018794,Cla015498,Cla010171,Novel00411,Cla001020,Cla006317,Novel00518,Cla012575,Cla019293,Cla020056,Cla007745,Cla003303,Cla016926,Cla007674,Cla007073,Cla007461
GO:0006821	chloride transport	biological_process	0.37418	1	2	2218	10	15506	Cla018359,Cla009044
GO:0005829	cytosol	cellular_component	0.37425	1	4	2218	21	15506	Cla019014,Cla018367,Cla021734,Cla008191
GO:0044445	cytosolic part	cellular_component	0.37425	1	4	2218	21	15506	Cla019014,Cla008191,Cla021734,Cla018367
GO:0006368	transcription elongation from RNA polymerase II promoter	biological_process	0.37458	1	5	2218	28	15506	Cla017734,Cla014389,Cla018574,Cla008676,Cla021209
GO:0000270	peptidoglycan metabolic process	biological_process	0.37471	1	1	2218	3	15506	Cla015515
GO:0031123	RNA 3'-end processing	biological_process	0.37473	1	3	2218	15	15506	Cla021247,Cla019068,Cla010791
GO:0016742	hydroxymethyl-, formyl- and related transferase activity	molecular_function	0.375	1	2	2218	9	15506	Cla020517,Cla023338
GO:0009991	response to extracellular stimulus	biological_process	0.37538	1	6	2218	33	15506	Cla018885,Cla011578,Cla001775,Cla020286,Cla019376,Novel01082
GO:0031668	cellular response to extracellular stimulus	biological_process	0.37538	1	6	2218	33	15506	Cla001775,Cla018885,Cla011578,Cla019376,Cla020286,Novel01082
GO:0071496	cellular response to external stimulus	biological_process	0.37538	1	6	2218	33	15506	Cla001775,Cla018885,Cla011578,Cla019376,Cla020286,Novel01082
GO:0019439	aromatic compound catabolic process	biological_process	0.37611	1	15	2218	93	15506	Cla018433,Cla018469,Cla017396,Cla011125,Cla014185,Cla000199,Cla022442,Cla010253,Cla010434,Cla003262,Cla001775,Cla018240,Cla016041,Cla010255,Cla010280
GO:0030077	plasma membrane light-harvesting complex	cellular_component	0.37735	1	1	2218	3	15506	Cla000199
GO:0042716	plasma membrane-derived chromatophore	cellular_component	0.37735	1	1	2218	3	15506	Cla000199
GO:0071229	cellular response to acid chemical	biological_process	0.37756	1	1	2218	3	15506	Cla011936
GO:0004146	dihydrofolate reductase activity	molecular_function	0.37835	1	1	2218	3	15506	Cla016577
GO:0006545	glycine biosynthetic process	biological_process	0.37835	1	1	2218	3	15506	Cla016577
GO:0006783	heme biosynthetic process	biological_process	0.37876	1	9	2218	54	15506	Cla007434,Cla010547,Cla001251,Cla022670,Cla002033,Cla002517,Cla004245,Cla004284,Cla020476
GO:0008171	O-methyltransferase activity	molecular_function	0.37942	1	11	2218	66	15506	Cla008222,Cla022972,Cla006932,Cla017759,Cla023413,Cla006029,Cla011228,Cla022974,Cla010664,Cla010643,Cla018460
GO:0008047	enzyme activator activity	molecular_function	0.37981	1	9	2218	54	15506	Cla008140,Cla009828,Cla016201,Cla011536,Cla002891,Cla016690,Cla021499,Cla018253,Cla008139
GO:0000428	DNA-directed RNA polymerase complex	cellular_component	0.38008	1	12	2218	75	15506	Cla023338,Cla004685,Cla021209,Cla017037,Cla013328,Cla018574,Cla014389,Cla002370,Cla017877,Cla002332,Cla006812,Cla008341
GO:0030880	RNA polymerase complex	cellular_component	0.38008	1	12	2218	75	15506	Cla023338,Cla021209,Cla017037,Cla004685,Cla013328,Cla018574,Cla014389,Cla002370,Cla017877,Cla002332,Cla006812,Cla008341
GO:0055029	nuclear DNA-directed RNA polymerase complex	cellular_component	0.38008	1	12	2218	75	15506	Cla008341,Cla006812,Cla002332,Cla017877,Cla002370,Cla014389,Cla018574,Cla017037,Cla021209,Cla013328,Cla004685,Cla023338
GO:0009240	isopentenyl diphosphate biosynthetic process	biological_process	0.38008	1	1	2218	3	15506	Cla015963
GO:0016726	oxidoreductase activity, acting on CH or CH2 groups, NAD or NADP as acceptor	molecular_function	0.38008	1	1	2218	3	15506	Cla015963
GO:0019288	isopentenyl diphosphate biosynthetic process, methylerythritol 4-phosphate pathway	biological_process	0.38008	1	1	2218	3	15506	Cla015963
GO:0046490	isopentenyl diphosphate metabolic process	biological_process	0.38008	1	1	2218	3	15506	Cla015963
GO:0050992	dimethylallyl diphosphate biosynthetic process	biological_process	0.38008	1	1	2218	3	15506	Cla015963
GO:0050993	dimethylallyl diphosphate metabolic process	biological_process	0.38008	1	1	2218	3	15506	Cla015963
GO:0051745	4-hydroxy-3-methylbut-2-en-1-yl diphosphate reductase activity	molecular_function	0.38008	1	1	2218	3	15506	Cla015963
GO:0005261	cation channel activity	molecular_function	0.38023	1	12	2218	76	15506	Novel01071,Cla014389,Cla017037,Cla021209,Cla014150,Cla012513,Cla010562,Cla020293,Cla009747,Cla008341,Cla001947,Cla010691
GO:0004061	arylformamidase activity	molecular_function	0.38116	1	1	2218	3	15506	Cla016041
GO:0070403	NAD+ binding	molecular_function	0.38155	1	1	2218	3	15506	Cla007831
GO:0004820	glycine-tRNA ligase activity	molecular_function	0.38315	1	1	2218	3	15506	Cla021991
GO:0006426	glycyl-tRNA aminoacylation	biological_process	0.38315	1	1	2218	3	15506	Cla021991
GO:0005991	trehalose metabolic process	biological_process	0.38479	1	4	2218	23	15506	Cla011371,Cla011369,Cla005675,Cla008123
GO:0048584	positive regulation of response to stimulus	biological_process	0.38597	1	6	2218	35	15506	Novel00689,Cla020604,Cla013877,Cla009301,Cla003947,Cla011936
GO:0009404	toxin metabolic process	biological_process	0.38652	1	2	2218	10	15506	Novel00268,Cla001225
GO:0006855	drug transmembrane transport	biological_process	0.38691	1	8	2218	48	15506	Cla016600,Cla015240,Cla020435,Cla004949,Cla015755,Cla011528,Cla016601,Cla014122
GO:0015893	drug transport	biological_process	0.38691	1	8	2218	48	15506	Cla004949,Cla015755,Cla020435,Cla015240,Cla016600,Cla014122,Cla016601,Cla011528
GO:0042493	response to drug	biological_process	0.38691	1	8	2218	48	15506	Cla004949,Cla015755,Cla020435,Cla015240,Cla016600,Cla014122,Cla016601,Cla011528
GO:0008914	leucyltransferase activity	molecular_function	0.38711	1	1	2218	4	15506	Cla015127
GO:0044802	single-organism membrane organization	biological_process	0.38777	1	19	2218	124	15506	Novel01170,Cla007370,Cla022724,Cla016465,Cla021256,Cla022686,Cla017560,Cla007369,Cla020551,Cla013730,Cla005583,Cla022698,Cla021734,Cla023201,Novel00643,Cla008887,Cla000667,Cla019070,Cla004074
GO:0044707	single-multicellular organism process	biological_process	0.38805	1	31	2218	205	15506	Cla015270,Cla016791,Cla022077,Cla008434,Cla008486,Cla008555,Cla017742,Cla014766,Cla014855,Cla006317,Cla011409,Cla013241,Cla010900,Cla021734,Cla014248,Cla016926,Cla011668,Cla004747,Cla022333,Cla013158,Cla019993,Cla015498,Cla003276,Cla014068,Cla009478,Cla009910,Cla020286,Cla007846,Cla008676,Novel01124,Cla019527
GO:0005975	carbohydrate metabolic process	biological_process	0.38867	1	119	2218	824	15506	Cla021208,Cla002601,Novel00903,Cla020743,Cla017383,Cla018547,Cla022882,Cla001469,Cla010205,Cla008465,Cla012772,Cla023033,Cla007303,Cla011369,Cla003122,Cla019462,Cla004216,Cla007501,Cla008191,Cla004639,Cla005675,Cla023286,Cla008978,Cla012154,Cla015692,Cla009948,Cla000612,Cla011144,Cla005994,Cla016555,Cla008181,Cla004920,Cla010295,Cla022170,Cla004918,Cla018918,Cla003938,Cla007689,Cla000798,Cla01889…
GO:0004421	hydroxymethylglutaryl-CoA synthase activity	molecular_function	0.38976	1	1	2218	3	15506	Cla001148
GO:0022604	regulation of cell morphogenesis	biological_process	0.38985	1	1	2218	3	15506	Cla009901
GO:0051656	establishment of organelle localization	biological_process	0.39261	1	1	2218	3	15506	Cla009901
GO:0008144	drug binding	molecular_function	0.39315	1	1	2218	4	15506	Cla010281
GO:0004932	mating-type factor pheromone receptor activity	molecular_function	0.39337	1	1	2218	4	15506	Cla012575
GO:0032182	ubiquitin-like protein binding	molecular_function	0.39339	1	3	2218	15	15506	Cla015597,Cla015165,Cla018253
GO:0003905	alkylbase DNA N-glycosylase activity	molecular_function	0.39351	1	2	2218	9	15506	Cla015323,Cla020743
GO:0001671	ATPase activator activity	molecular_function	0.39414	1	1	2218	3	15506	Cla002891
GO:0043631	RNA polyadenylation	biological_process	0.39527	1	2	2218	10	15506	Cla010754,Cla021247
GO:0019213	deacetylase activity	molecular_function	0.39561	1	1	2218	3	15506	Cla011799
GO:0043085	positive regulation of catalytic activity	biological_process	0.39573	1	1	2218	3	15506	Cla021916
GO:0033647	host intracellular organelle	cellular_component	0.39589	1	11	2218	69	15506	Cla009282,Cla008294,Cla016001,Cla003300,Cla020047,Cla016176,Novel00317,Cla021147,Cla019304,Cla020053,Cla019444
GO:0033648	host intracellular membrane-bounded organelle	cellular_component	0.39589	1	11	2218	69	15506	Cla021147,Cla019304,Cla020053,Cla019444,Novel00317,Cla016001,Cla003300,Cla020047,Cla016176,Cla009282,Cla008294
GO:0016586	RSC complex	cellular_component	0.39591	1	1	2218	3	15506	Cla001643
GO:0016860	intramolecular oxidoreductase activity	molecular_function	0.39727	1	5	2218	28	15506	Cla013309,Cla022499,Cla016115,Cla022170,Cla019106
GO:0005849	mRNA cleavage factor complex	cellular_component	0.3974	1	1	2218	3	15506	Cla021247
GO:0006378	mRNA polyadenylation	biological_process	0.3974	1	1	2218	3	15506	Cla021247
GO:0000774	adenyl-nucleotide exchange factor activity	molecular_function	0.39772	1	4	2218	22	15506	Cla018195,Cla012065,Cla003885,Cla005340
GO:0000922	spindle pole	cellular_component	0.39833	1	2	2218	11	15506	Cla008037,Cla012454
GO:0012502	induction of programmed cell death	biological_process	0.39848	1	1	2218	3	15506	Cla016176
GO:0019051	induction by virus of host apoptotic process	biological_process	0.39848	1	1	2218	3	15506	Cla016176
GO:0031341	regulation of cell killing	biological_process	0.39848	1	1	2218	3	15506	Cla016176
GO:0031343	positive regulation of cell killing	biological_process	0.39848	1	1	2218	3	15506	Cla016176
GO:0043902	positive regulation of multi-organism process	biological_process	0.39848	1	1	2218	3	15506	Cla016176
GO:0044533	positive regulation of apoptotic process in other organism	biological_process	0.39848	1	1	2218	3	15506	Cla016176
GO:0051709	regulation of killing of cells of other organism	biological_process	0.39848	1	1	2218	3	15506	Cla016176
GO:0051712	positive regulation of killing of cells of other organism	biological_process	0.39848	1	1	2218	3	15506	Cla016176
GO:0052042	positive regulation by symbiont of host programmed cell death	biological_process	0.39848	1	1	2218	3	15506	Cla016176
GO:0052151	positive regulation by symbiont of host apoptotic process	biological_process	0.39848	1	1	2218	3	15506	Cla016176
GO:0052330	positive regulation by organism of programmed cell death in other organism involved in symbiotic interaction	biological_process	0.39848	1	1	2218	3	15506	Cla016176
GO:0052501	positive regulation by organism of apoptotic process in other organism involved in symbiotic interaction	biological_process	0.39848	1	1	2218	3	15506	Cla016176
GO:0060139	positive regulation of apoptotic process by virus	biological_process	0.39848	1	1	2218	3	15506	Cla016176
GO:0019682	glyceraldehyde-3-phosphate metabolic process	biological_process	0.39854	1	2	2218	9	15506	Cla015963,Cla010932
GO:0003333	amino acid transmembrane transport	biological_process	0.39983	1	6	2218	36	15506	Cla019527,Cla003221,Cla012146,Cla000539,Cla007265,Cla002221
GO:0098656	anion transmembrane transport	biological_process	0.39983	1	6	2218	36	15506	Cla012146,Cla002221,Cla000539,Cla007265,Cla003221,Cla019527
GO:1903825	organic acid transmembrane transport	biological_process	0.39983	1	6	2218	36	15506	Cla003221,Cla019527,Cla012146,Cla002221,Cla000539,Cla007265
GO:0004312	fatty acid synthase activity	molecular_function	0.40044	1	4	2218	22	15506	Cla011561,Cla017158,Cla005852,Cla022704
GO:0008168	methyltransferase activity	molecular_function	0.40161	1	48	2218	322	15506	Cla020276,Cla010664,Cla018460,Cla016577,Cla017148,Cla023413,Cla006797,Cla006029,Novel00587,Cla013606,Cla007590,Cla022972,Cla009165,Cla016977,Cla012201,Cla006473,Cla010098,Cla022230,Cla021262,Cla014389,Cla004242,Cla008222,Cla004567,Cla022974,Cla020761,Cla021684,Cla010643,Cla000547,Cla015641,Cla017759,Cla016971,Cla013499,Cla002060,Cla011228,Cla014889,Cla006932,Cla002903,Cla004901,Cla003987,Cla01275…
GO:0006749	glutathione metabolic process	biological_process	0.40166	1	2	2218	10	15506	Cla017814,Cla014176
GO:0008757	S-adenosylmethionine-dependent methyltransferase activity	molecular_function	0.40217	1	14	2218	88	15506	Cla023413,Cla016822,Cla002060,Cla006029,Cla022230,Cla011228,Cla020276,Cla010098,Cla018460,Cla003471,Cla008222,Cla004901,Cla014389,Cla006932
GO:0019867	outer membrane	cellular_component	0.40267	1	27	2218	174	15506	Novel00688,Cla021734,Cla021891,Cla018895,Cla012513,Cla004074,Cla005012,Cla020337,Cla008887,Cla009207,Cla000667,Cla010292,Cla013053,Cla020053,Cla009215,Cla008635,Cla003667,Cla002376,Cla001947,Cla013730,Cla004353,Cla011011,Cla007619,Cla022686,Cla010745,Cla019967,Cla007689
GO:0009245	lipid A biosynthetic process	biological_process	0.40313	1	2	2218	9	15506	Cla021407,Cla021734
GO:0046493	lipid A metabolic process	biological_process	0.40313	1	2	2218	9	15506	Cla021407,Cla021734
GO:1901269	lipooligosaccharide metabolic process	biological_process	0.40313	1	2	2218	9	15506	Cla021407,Cla021734
GO:1901271	lipooligosaccharide biosynthetic process	biological_process	0.40313	1	2	2218	9	15506	Cla021734,Cla021407
GO:0008654	phospholipid biosynthetic process	biological_process	0.40799	1	10	2218	63	15506	Cla021734,Cla011595,Cla021407,Cla006940,Cla016167,Cla000539,Cla015963,Cla008975,Cla014460,Cla020432
GO:0008138	protein tyrosine/serine/threonine phosphatase activity	molecular_function	0.40878	1	4	2218	23	15506	Cla013695,Cla009377,Cla010030,Cla013973
GO:0004748	ribonucleoside-diphosphate reductase activity, thioredoxin disulfide as acceptor	molecular_function	0.41056	1	1	2218	4	15506	Cla021037
GO:0061731	ribonucleoside-diphosphate reductase activity	molecular_function	0.41056	1	1	2218	4	15506	Cla021037
GO:0016579	protein deubiquitination	biological_process	0.41165	1	4	2218	26	15506	Cla015597,Cla015598,Cla021416,Cla005407
GO:0070646	protein modification by small protein removal	biological_process	0.41165	1	4	2218	26	15506	Cla015597,Cla015598,Cla005407,Cla021416
GO:0006811	ion transport	biological_process	0.41229	1	122	2218	844	15506	Cla012810,Cla021367,Cla022292,Novel01098,Cla016672,Cla003005,Cla017266,Cla023225,Cla010691,Cla013971,Cla014344,Cla015027,Cla003303,Cla019971,Cla020867,Cla009088,Cla015211,Cla015466,Cla021378,Novel01304,Cla016840,Cla015490,Cla015028,Cla006484,Cla018245,Cla018359,Cla010562,Cla001829,Cla008545,Cla018888,Cla015238,Cla022107,Cla022844,Cla019527,Cla008897,Novel00571,Cla015497,Cla021405,Cla021131,Novel0…
GO:0006432	phenylalanyl-tRNA aminoacylation	biological_process	0.41373	1	1	2218	4	15506	Cla006791
GO:0044270	cellular nitrogen compound catabolic process	biological_process	0.41391	1	14	2218	89	15506	Cla010280,Cla018240,Cla016041,Cla010255,Cla010253,Cla010434,Cla003262,Cla018469,Cla011125,Cla018433,Cla017396,Cla014185,Cla000199,Cla022442
GO:0051220	cytoplasmic sequestering of protein	biological_process	0.4165	1	2	2218	10	15506	Novel01030,Cla010537
GO:0033645	host cell endomembrane system	cellular_component	0.41806	1	1	2218	4	15506	Cla019444
GO:0044165	host cell endoplasmic reticulum	cellular_component	0.41806	1	1	2218	4	15506	Cla019444
GO:0044167	host cell endoplasmic reticulum membrane	cellular_component	0.41806	1	1	2218	4	15506	Cla019444
GO:0044385	integral to membrane of host cell	cellular_component	0.41806	1	1	2218	4	15506	Cla019444
GO:0044386	integral to host endoplasmic reticulum membrane	cellular_component	0.41806	1	1	2218	4	15506	Cla019444
GO:0044463	cell projection part	cellular_component	0.41869	1	2	2218	10	15506	Cla020815,Cla012513
GO:0016413	O-acetyltransferase activity	molecular_function	0.42028	1	2	2218	10	15506	Cla007727,Cla016366
GO:0006887	exocytosis	biological_process	0.4205	1	10	2218	68	15506	Cla018561,Cla002617,Cla021208,Cla009145,Cla005012,Cla013263,Cla020354,Cla014100,Cla013857,Cla013651
GO:0030695	GTPase regulator activity	molecular_function	0.42055	1	8	2218	49	15506	Cla011536,Cla016201,Cla009828,Cla008140,Cla008139,Cla018253,Cla021499,Cla016690
GO:0002694	regulation of leukocyte activation	biological_process	0.42256	1	1	2218	4	15506	Cla012636
GO:0046649	lymphocyte activation	biological_process	0.42256	1	1	2218	4	15506	Cla012636
GO:0050865	regulation of cell activation	biological_process	0.42256	1	1	2218	4	15506	Cla012636
GO:0051249	regulation of lymphocyte activation	biological_process	0.42256	1	1	2218	4	15506	Cla012636
GO:0045934	negative regulation of nucleobase-containing compound metabolic process	biological_process	0.42322	1	6	2218	37	15506	Cla014032,Cla011799,Novel01185,Cla001799,Cla003602,Cla005583
GO:0003964	RNA-directed DNA polymerase activity	molecular_function	0.42328	1	1	2218	4	15506	Cla007619
GO:0006023	aminoglycan biosynthetic process	biological_process	0.42334	1	2	2218	10	15506	Cla020517,Cla018056
GO:0008193	tRNA guanylyltransferase activity	molecular_function	0.42556	1	1	2218	4	15506	Cla012928
GO:0006816	calcium ion transport	biological_process	0.42579	1	3	2218	18	15506	Cla022107,Cla001829,Cla010562
GO:0035251	UDP-glucosyltransferase activity	molecular_function	0.42643	1	9	2218	65	15506	Cla012972,Cla017383,Cla012973,Cla023286,Cla017384,Cla008465,Cla011131,Cla003320,Cla004473
GO:0070838	divalent metal ion transport	biological_process	0.42695	1	16	2218	106	15506	Cla001829,Cla022628,Cla010562,Cla020249,Cla022844,Cla022107,Cla008897,Cla009946,Cla001020,Cla021405,Cla021367,Cla010071,Cla012810,Cla016137,Cla020867,Cla009157
GO:0033013	tetrapyrrole metabolic process	biological_process	0.42803	1	26	2218	168	15506	Cla007272,Cla022442,Cla005450,Cla022670,Cla001251,Cla017396,Cla011998,Cla010255,Cla012137,Cla006332,Cla004245,Cla002517,Cla009215,Cla002033,Cla020476,Cla016861,Cla004284,Cla017299,Cla010253,Cla014760,Cla018433,Cla010547,Cla014239,Cla008210,Cla007434,Cla020208
GO:0008536	Ran GTPase binding	molecular_function	0.42807	1	3	2218	20	15506	Cla021147,Cla002033,Cla009213
GO:0044272	sulfur compound biosynthetic process	biological_process	0.42818	1	6	2218	37	15506	Cla017149,Cla020517,Cla017814,Cla017148,Cla002903,Cla009782
GO:0010109	regulation of photosynthesis	biological_process	0.4293	1	1	2218	4	15506	Cla006317
GO:0042548	regulation of photosynthesis, light reaction	biological_process	0.4293	1	1	2218	4	15506	Cla006317
GO:0042549	photosystem II stabilization	biological_process	0.4293	1	1	2218	4	15506	Cla006317
GO:0043467	regulation of generation of precursor metabolites and energy	biological_process	0.4293	1	1	2218	4	15506	Cla006317
GO:0000145	exocyst	cellular_component	0.42942	1	7	2218	47	15506	Cla013263,Cla013651,Cla009145,Cla005012,Cla002617,Cla014100,Cla018561
GO:0008135	translation factor activity, RNA binding	molecular_function	0.43284	1	14	2218	89	15506	Cla006349,Cla015845,Cla013147,Cla022077,Cla018955,Cla018574,Cla018049,Cla005690,Cla017037,Cla014044,Cla007679,Cla020266,Cla019797,Cla010217
GO:0010564	regulation of cell cycle process	biological_process	0.4335	1	5	2218	30	15506	Cla005564,Cla012513,Novel00688,Cla016667,Cla017500
GO:0003997	acyl-CoA oxidase activity	molecular_function	0.4337	1	1	2218	4	15506	Cla003665
GO:0050896	response to stimulus	biological_process	0.43383	1	250	2218	1736	15506	Cla000615,Cla019797,Cla011367,Cla020249,Cla013732,Cla021690,Cla019297,Cla008438,Cla004918,Cla007396,Novel00268,Cla019607,Cla013152,Cla005206,Cla001020,Cla012350,Cla008501,Cla014375,Cla020787,Cla019293,Cla012278,Cla003146,Cla016110,Cla022043,Cla008802,Cla013903,Cla019217,Cla007073,Cla011357,Cla004949,Cla022563,Cla018469,Novel00908,Cla003609,Cla005612,Cla020286,Cla018117,Cla014216,Cla009612,Cla0140…
GO:0008452	RNA ligase activity	molecular_function	0.43388	1	1	2218	4	15506	Cla005050
GO:0033365	protein localization to organelle	biological_process	0.43402	1	23	2218	154	15506	Cla005583,Cla018895,Cla022698,Cla021734,Cla023201,Cla014028,Cla010537,Cla020337,Cla008887,Cla019070,Cla004074,Novel01030,Cla003667,Cla009478,Cla019797,Cla007370,Cla021256,Cla017560,Cla007369,Cla022686,Cla020551,Cla011011,Cla023321
GO:0043624	cellular protein complex disassembly	biological_process	0.4342	1	4	2218	23	15506	Cla010217,Cla019797,Cla018955,Cla005690
GO:0016884	carbon-nitrogen ligase activity, with glutamine as amido-N-donor	molecular_function	0.43496	1	2	2218	11	15506	Cla007622,Cla021970
GO:0070566	adenylyltransferase activity	molecular_function	0.43647	1	4	2218	24	15506	Cla020047,Cla008299,Cla007587,Cla010754
GO:0005784	Sec61 translocon complex	cellular_component	0.43701	1	1	2218	4	15506	Novel00643
GO:0071256	translocon complex	cellular_component	0.43701	1	1	2218	4	15506	Novel00643
GO:0072511	divalent inorganic cation transport	biological_process	0.43823	1	17	2218	114	15506	Cla020867,Cla009157,Cla010071,Cla012810,Cla012011,Cla021367,Cla016137,Cla008897,Cla021405,Cla009946,Cla001020,Cla001829,Cla022628,Cla010562,Cla022844,Cla020249,Cla022107
GO:0016538	cyclin-dependent protein serine/threonine kinase regulator activity	molecular_function	0.43831	1	3	2218	16	15506	Cla014032,Cla001856,Cla020190
GO:0033692	cellular polysaccharide biosynthetic process	biological_process	0.43888	1	11	2218	78	15506	Cla012973,Cla018547,Cla017383,Cla012972,Cla004473,Cla003320,Cla008465,Novel01098,Cla017384,Cla023286,Cla012748
GO:0004096	catalase activity	molecular_function	0.43903	1	1	2218	4	15506	Cla023447
GO:0005539	glycosaminoglycan binding	molecular_function	0.4394	1	1	2218	4	15506	Cla016465
GO:0008201	heparin binding	molecular_function	0.4394	1	1	2218	4	15506	Cla016465
GO:0004174	electron-transferring-flavoprotein dehydrogenase activity	molecular_function	0.44011	1	1	2218	4	15506	Cla009816
GO:0016649	oxidoreductase activity, acting on the CH-NH group of donors, quinone or similar compound as acceptor	molecular_function	0.44011	1	1	2218	4	15506	Cla009816
GO:0009312	oligosaccharide biosynthetic process	biological_process	0.44077	1	8	2218	51	15506	Cla018918,Cla015692,Cla021734,Cla005675,Cla010205,Cla008123,Cla018595,Cla021407
GO:1901606	alpha-amino acid catabolic process	biological_process	0.44136	1	3	2218	17	15506	Cla016041,Cla005589,Cla021934
GO:0004612	phosphoenolpyruvate carboxykinase (ATP) activity	molecular_function	0.4416	1	1	2218	4	15506	Cla023084
GO:1901700	response to oxygen-containing compound	biological_process	0.44188	1	4	2218	23	15506	Cla021949,Cla020761,Cla011936,Cla021379
GO:0009060	aerobic respiration	biological_process	0.4457	1	3	2218	17	15506	Cla007123,Cla002312,Cla000142
GO:0051049	regulation of transport	biological_process	0.44627	1	3	2218	18	15506	Novel01240,Cla016465,Novel00838
GO:0000090	mitotic anaphase	biological_process	0.44696	1	2	2218	10	15506	Cla021046,Cla021734
GO:0051322	anaphase	biological_process	0.44696	1	2	2218	10	15506	Cla021046,Cla021734
GO:0016437	tRNA cytidylyltransferase activity	molecular_function	0.44775	1	1	2218	4	15506	Cla008299
GO:0042168	heme metabolic process	biological_process	0.44791	1	9	2218	57	15506	Cla007434,Cla010547,Cla022670,Cla001251,Cla020476,Cla004284,Cla002517,Cla004245,Cla002033
GO:0016407	acetyltransferase activity	molecular_function	0.44833	1	11	2218	71	15506	Cla016366,Cla021613,Cla016822,Cla007727,Cla007837,Cla020554,Cla015211,Cla014389,Cla020335,Cla014766,Cla022297
GO:0042255	ribosome assembly	biological_process	0.44882	1	1	2218	4	15506	Cla007833
GO:0042256	mature ribosome assembly	biological_process	0.44882	1	1	2218	4	15506	Cla007833
GO:0006113	fermentation	biological_process	0.45003	1	1	2218	4	15506	Cla005589
GO:0019665	anaerobic amino acid catabolic process	biological_process	0.45003	1	1	2218	4	15506	Cla005589
GO:0001101	response to acid chemical	biological_process	0.45039	1	3	2218	16	15506	Cla011936,Cla021379,Cla021949
GO:0032270	positive regulation of cellular protein metabolic process	biological_process	0.4509	1	2	2218	10	15506	Cla011936,Cla010217
GO:0051247	positive regulation of protein metabolic process	biological_process	0.4509	1	2	2218	10	15506	Cla011936,Cla010217
GO:0015288	porin activity	molecular_function	0.45094	1	1	2218	4	15506	Cla013337
GO:0022829	wide pore channel activity	molecular_function	0.45094	1	1	2218	4	15506	Cla013337
GO:0016032	viral process	biological_process	0.45096	1	40	2218	277	15506	Cla008720,Cla018314,Cla019571,Cla016176,Cla009282,Cla016661,Cla018866,Cla019919,Cla012284,Cla007501,Cla003325,Cla010580,Cla004278,Cla016088,Cla012513,Cla010405,Cla000543,Cla003535,Cla019444,Cla021997,Cla021734,Cla010650,Cla017661,Cla014632,Cla017615,Cla018885,Cla008692,Cla010875,Cla009630,Cla016736,Cla004685,Cla002350,Cla017808,Cla004918,Cla020053,Cla009604,Cla020455,Cla005201,Cla004874,Cla019293
GO:0070588	calcium ion transmembrane transport	biological_process	0.4514	1	1	2218	4	15506	Cla010562
GO:0015238	drug transmembrane transporter activity	molecular_function	0.45162	1	8	2218	51	15506	Cla011528,Cla016601,Cla014122,Cla016600,Cla015240,Cla020435,Cla015755,Cla004949
GO:0090484	drug transporter activity	molecular_function	0.45162	1	8	2218	51	15506	Cla016601,Cla011528,Cla014122,Cla015240,Cla016600,Cla015755,Cla004949,Cla020435
GO:0030001	metal ion transport	biological_process	0.45171	1	57	2218	391	15506	Cla015466,Cla020867,Cla021209,Cla015211,Cla021327,Cla016672,Cla013374,Cla019644,Cla010691,Cla015027,Cla013971,Cla010071,Cla012810,Cla020293,Cla021367,Novel01098,Cla021250,Cla021405,Cla001020,Novel00841,Cla010547,Cla016901,Cla019977,Cla008897,Novel00571,Cla022678,Cla005671,Cla008545,Cla020476,Cla022107,Cla011094,Cla022844,Cla020249,Cla019527,Cla015028,Cla010562,Cla001829,Cla017061,Cla009157,Cla014…
GO:0005672	transcription factor TFIIA complex	cellular_component	0.45233	1	4	2218	24	15506	Cla013328,Cla006812,Cla004685,Cla002332
GO:0001881	receptor recycling	biological_process	0.45251	1	1	2218	4	15506	Cla011936
GO:0004635	phosphoribosyl-AMP cyclohydrolase activity	molecular_function	0.45322	1	1	2218	4	15506	Novel01117
GO:0010927	cellular component assembly involved in morphogenesis	biological_process	0.45429	1	1	2218	4	15506	Cla012513
GO:0042384	cilium assembly	biological_process	0.45429	1	1	2218	4	15506	Cla012513
GO:0060271	cilium morphogenesis	biological_process	0.45429	1	1	2218	4	15506	Cla012513
GO:0043487	regulation of RNA stability	biological_process	0.45581	1	1	2218	4	15506	Cla006678
GO:0043488	regulation of mRNA stability	biological_process	0.45581	1	1	2218	4	15506	Cla006678
GO:0043489	RNA stabilization	biological_process	0.45581	1	1	2218	4	15506	Cla006678
GO:0048255	mRNA stabilization	biological_process	0.45581	1	1	2218	4	15506	Cla006678
GO:0050852	T cell receptor signaling pathway	biological_process	0.45584	1	1	2218	4	15506	Novel00689
GO:0017172	cysteine dioxygenase activity	molecular_function	0.45593	1	1	2218	4	15506	Cla008324
GO:0046439	L-cysteine metabolic process	biological_process	0.45593	1	1	2218	4	15506	Cla008324
GO:0031344	regulation of cell projection organization	biological_process	0.45612	1	1	2218	4	15506	Cla018240
GO:0060491	regulation of cell projection assembly	biological_process	0.45612	1	1	2218	4	15506	Cla018240
GO:1902115	regulation of organelle assembly	biological_process	0.45612	1	1	2218	4	15506	Cla018240
GO:1902208	regulation of bacterial-type flagellum assembly	biological_process	0.45612	1	1	2218	4	15506	Cla018240
GO:0008593	regulation of Notch signaling pathway	biological_process	0.4565	1	1	2218	4	15506	Cla009301
GO:0045747	positive regulation of Notch signaling pathway	biological_process	0.4565	1	1	2218	4	15506	Cla009301
GO:0000122	negative regulation of transcription from RNA polymerase II promoter	biological_process	0.45681	1	1	2218	4	15506	Cla014032
GO:0006276	plasmid maintenance	biological_process	0.45709	1	1	2218	4	15506	Cla018955
GO:1901361	organic cyclic compound catabolic process	biological_process	0.45831	1	14	2218	91	15506	Cla014185,Cla011125,Cla018469,Cla018433,Cla017396,Cla000199,Cla022442,Cla003262,Cla010434,Cla010253,Cla010255,Cla016041,Cla018240,Cla010280
GO:0016070	RNA metabolic process	biological_process	0.45852	1	322	2218	2237	15506	Cla021247,Cla012928,Cla015270,Cla007092,Cla018240,Cla021997,Cla017877,Cla001251,Cla018438,Cla017851,Cla018314,Cla010280,Cla020915,Cla007950,Cla011810,Cla014316,Cla004278,Cla009035,Cla018407,Cla016840,Novel00448,Cla015666,Cla017202,Novel00878,Cla014150,Cla013063,Cla005012,Cla019225,Cla009746,Cla014262,Cla022698,Cla014265,Cla021816,Cla006605,Cla017988,Cla014082,Cla010171,Cla023338,Cla008897,Cla0167…
GO:0032940	secretion by cell	biological_process	0.45911	1	13	2218	91	15506	Cla005012,Cla012350,Cla011902,Cla009145,Cla013263,Cla018561,Cla021208,Cla002617,Novel01282,Cla013857,Cla013651,Cla014100,Cla020354
GO:0046903	secretion	biological_process	0.45911	1	13	2218	91	15506	Cla013651,Cla013857,Novel01282,Cla020354,Cla014100,Cla013263,Cla011902,Cla009145,Cla005012,Cla012350,Cla002617,Cla021208,Cla018561
GO:0009403	toxin biosynthetic process	biological_process	0.4592	1	1	2218	4	15506	Cla001225
GO:0005929	cilium	cellular_component	0.45923	1	7	2218	44	15506	Cla008089,Cla012749,Cla019297,Cla003885,Cla012513,Cla013730,Cla022644
GO:0003746	translation elongation factor activity	molecular_function	0.46002	1	3	2218	17	15506	Cla013147,Cla018049,Cla010217
GO:0003840	gamma-glutamyltransferase activity	molecular_function	0.4601	1	1	2218	4	15506	Cla014176
GO:0016901	oxidoreductase activity, acting on the CH-OH group of donors, quinone or similar compound as acceptor	molecular_function	0.46017	1	1	2218	4	15506	Cla008329
GO:0000372	Group I intron splicing	biological_process	0.46055	1	3	2218	19	15506	Cla009557,Cla019971,Cla021647
GO:0000376	RNA splicing, via transesterification reactions with guanosine as nucleophile	biological_process	0.46055	1	3	2218	19	15506	Cla009557,Cla021647,Cla019971
GO:0014065	phosphatidylinositol 3-kinase signaling	biological_process	0.4608	1	2	2218	11	15506	Cla013877,Cla020604
GO:0014066	regulation of phosphatidylinositol 3-kinase signaling	biological_process	0.4608	1	2	2218	11	15506	Cla020604,Cla013877
GO:0014068	positive regulation of phosphatidylinositol 3-kinase signaling	biological_process	0.4608	1	2	2218	11	15506	Cla020604,Cla013877
GO:0043548	phosphatidylinositol 3-kinase binding	molecular_function	0.4608	1	2	2218	11	15506	Cla020604,Cla013877
GO:0048015	phosphatidylinositol-mediated signaling	biological_process	0.4608	1	2	2218	11	15506	Cla020604,Cla013877
GO:0048017	inositol lipid-mediated signaling	biological_process	0.4608	1	2	2218	11	15506	Cla013877,Cla020604
GO:0009308	amine metabolic process	biological_process	0.46307	1	12	2218	82	15506	Cla019958,Cla018314,Cla021016,Cla016041,Cla017808,Cla009259,Cla010704,Cla019021,Cla019645,Cla013433,Cla005603,Cla005375
GO:0042302	structural constituent of cuticle	molecular_function	0.46339	1	1	2218	4	15506	Cla019615
GO:0017003	protein-heme linkage	biological_process	0.46346	1	1	2218	4	15506	Cla014321
GO:0070851	growth factor receptor binding	molecular_function	0.46419	1	2	2218	11	15506	Cla013324,Cla014048
GO:0016591	DNA-directed RNA polymerase II, holoenzyme	cellular_component	0.46427	1	10	2218	66	15506	Cla023338,Cla014389,Cla018574,Cla021209,Cla013328,Cla004685,Cla017877,Cla002370,Cla006812,Cla002332
GO:0006029	proteoglycan metabolic process	biological_process	0.46462	1	1	2218	4	15506	Cla020517
GO:0015012	heparan sulfate proteoglycan biosynthetic process	biological_process	0.46462	1	1	2218	4	15506	Cla020517
GO:0030166	proteoglycan biosynthetic process	biological_process	0.46462	1	1	2218	4	15506	Cla020517
GO:0030201	heparan sulfate proteoglycan metabolic process	biological_process	0.46462	1	1	2218	4	15506	Cla020517
GO:0001522	pseudouridine synthesis	biological_process	0.46539	1	4	2218	24	15506	Cla019299,Cla007409,Cla013749,Cla022928
GO:0008023	transcription elongation factor complex	cellular_component	0.46548	1	3	2218	18	15506	Cla014389,Cla018574,Cla021209
GO:0006367	transcription initiation from RNA polymerase II promoter	biological_process	0.46643	1	7	2218	44	15506	Cla014643,Cla004685,Cla013328,Cla006812,Cla002332,Cla008676,Cla017734
GO:0005802	trans-Golgi network	cellular_component	0.46682	1	1	2218	4	15506	Cla016465
GO:0006893	Golgi to plasma membrane transport	biological_process	0.46682	1	1	2218	4	15506	Cla016465
GO:0032386	regulation of intracellular transport	biological_process	0.46682	1	1	2218	4	15506	Cla016465
GO:0032388	positive regulation of intracellular transport	biological_process	0.46682	1	1	2218	4	15506	Cla016465
GO:0032880	regulation of protein localization	biological_process	0.46682	1	1	2218	4	15506	Cla016465
GO:0033157	regulation of intracellular protein transport	biological_process	0.46682	1	1	2218	4	15506	Cla016465
GO:0042996	regulation of Golgi to plasma membrane protein transport	biological_process	0.46682	1	1	2218	4	15506	Cla016465
GO:0042998	positive regulation of Golgi to plasma membrane protein transport	biological_process	0.46682	1	1	2218	4	15506	Cla016465
GO:0043001	Golgi to plasma membrane protein transport	biological_process	0.46682	1	1	2218	4	15506	Cla016465
GO:0051222	positive regulation of protein transport	biological_process	0.46682	1	1	2218	4	15506	Cla016465
GO:0051223	regulation of protein transport	biological_process	0.46682	1	1	2218	4	15506	Cla016465
GO:0060341	regulation of cellular localization	biological_process	0.46682	1	1	2218	4	15506	Cla016465
GO:0070201	regulation of establishment of protein localization	biological_process	0.46682	1	1	2218	4	15506	Cla016465
GO:0071253	connexin binding	molecular_function	0.46682	1	1	2218	4	15506	Cla016465
GO:0072659	protein localization to plasma membrane	biological_process	0.46682	1	1	2218	4	15506	Cla016465
GO:0090002	establishment of protein localization to plasma membrane	biological_process	0.46682	1	1	2218	4	15506	Cla016465
GO:0090003	regulation of establishment of protein localization to plasma membrane	biological_process	0.46682	1	1	2218	4	15506	Cla016465
GO:0090004	positive regulation of establishment of protein localization to plasma membrane	biological_process	0.46682	1	1	2218	4	15506	Cla016465
GO:0090316	positive regulation of intracellular protein transport	biological_process	0.46682	1	1	2218	4	15506	Cla016465
GO:1903076	regulation of protein localization to plasma membrane	biological_process	0.46682	1	1	2218	4	15506	Cla016465
GO:1903078	positive regulation of protein localization to plasma membrane	biological_process	0.46682	1	1	2218	4	15506	Cla016465
GO:1903649	regulation of cytoplasmic transport	biological_process	0.46682	1	1	2218	4	15506	Cla016465
GO:1903651	positive regulation of cytoplasmic transport	biological_process	0.46682	1	1	2218	4	15506	Cla016465
GO:1903729	regulation of plasma membrane organization	biological_process	0.46682	1	1	2218	4	15506	Cla016465
GO:1903827	regulation of cellular protein localization	biological_process	0.46682	1	1	2218	4	15506	Cla016465
GO:1903829	positive regulation of cellular protein localization	biological_process	0.46682	1	1	2218	4	15506	Cla016465
GO:1904375	regulation of protein localization to cell periphery	biological_process	0.46682	1	1	2218	4	15506	Cla016465
GO:1904377	positive regulation of protein localization to cell periphery	biological_process	0.46682	1	1	2218	4	15506	Cla016465
GO:1990778	protein localization to cell periphery	biological_process	0.46682	1	1	2218	4	15506	Cla016465
GO:0002682	regulation of immune system process	biological_process	0.46935	1	6	2218	39	15506	Cla010030,Cla012636,Cla020604,Cla019444,Cla013877,Novel00689
GO:0006778	porphyrin-containing compound metabolic process	biological_process	0.46959	1	18	2218	118	15506	Cla008210,Cla010547,Cla007434,Cla004284,Cla010253,Cla020476,Cla016861,Cla002033,Cla002517,Cla004245,Cla018433,Cla010255,Cla007272,Cla017396,Cla001251,Cla022670,Cla022442,Cla005450
GO:0006354	DNA-templated transcription, elongation	biological_process	0.4697	1	5	2218	31	15506	Cla021209,Cla018574,Cla008676,Cla014389,Cla017734
GO:0004807	triose-phosphate isomerase activity	molecular_function	0.47032	1	1	2218	4	15506	Cla013309
GO:0008686	3,4-dihydroxy-2-butanone-4-phosphate synthase activity	molecular_function	0.47051	1	1	2218	4	15506	Cla021407
GO:0007599	hemostasis	biological_process	0.4735	1	8	2218	52	15506	Cla009478,Cla010900,Cla021734,Cla022333,Cla016791,Cla019993,Cla008555,Cla003276
GO:0050817	coagulation	biological_process	0.4735	1	8	2218	52	15506	Cla009478,Cla010900,Cla021734,Cla022333,Cla016791,Cla019993,Cla008555,Cla003276
GO:0050878	regulation of body fluid levels	biological_process	0.4735	1	8	2218	52	15506	Cla003276,Cla016791,Cla022333,Cla008555,Cla019993,Cla010900,Cla021734,Cla009478
GO:0004749	ribose phosphate diphosphokinase activity	molecular_function	0.47671	1	1	2218	4	15506	Cla008781
GO:0010827	regulation of glucose transport	biological_process	0.47673	1	1	2218	5	15506	Novel00838
GO:0010829	negative regulation of glucose transport	biological_process	0.47673	1	1	2218	5	15506	Novel00838
GO:0015758	glucose transport	biological_process	0.47673	1	1	2218	5	15506	Novel00838
GO:0046323	glucose import	biological_process	0.47673	1	1	2218	5	15506	Novel00838
GO:0046324	regulation of glucose import	biological_process	0.47673	1	1	2218	5	15506	Novel00838
GO:0046325	negative regulation of glucose import	biological_process	0.47673	1	1	2218	5	15506	Novel00838
GO:0008198	ferrous iron binding	molecular_function	0.47752	1	1	2218	4	15506	Cla001189
GO:0006569	tryptophan catabolic process	biological_process	0.47768	1	1	2218	4	15506	Cla016041
GO:0009310	amine catabolic process	biological_process	0.47768	1	1	2218	4	15506	Cla016041
GO:0019441	tryptophan catabolic process to kynurenine	biological_process	0.47768	1	1	2218	4	15506	Cla016041
GO:0042402	cellular biogenic amine catabolic process	biological_process	0.47768	1	1	2218	4	15506	Cla016041
GO:0042436	indole-containing compound catabolic process	biological_process	0.47768	1	1	2218	4	15506	Cla016041
GO:0046218	indolalkylamine catabolic process	biological_process	0.47768	1	1	2218	4	15506	Cla016041
GO:0070189	kynurenine metabolic process	biological_process	0.47768	1	1	2218	4	15506	Cla016041
GO:0004482	mRNA (guanine-N7-)-methyltransferase activity	molecular_function	0.47809	1	1	2218	4	15506	Cla016822
GO:0009065	glutamine family amino acid catabolic process	biological_process	0.47854	1	1	2218	4	15506	Cla005589
GO:0008837	diaminopimelate epimerase activity	molecular_function	0.47854	1	1	2218	4	15506	Cla014751
GO:0047661	amino-acid racemase activity	molecular_function	0.47854	1	1	2218	4	15506	Cla014751
GO:0042274	ribosomal small subunit biogenesis	biological_process	0.4798	1	1	2218	4	15506	Cla013859
GO:0015093	ferrous iron transmembrane transporter activity	molecular_function	0.48062	1	11	2218	74	15506	Cla008897,Cla009157,Cla009946,Cla001020,Cla010071,Cla012810,Cla022628,Cla021367,Cla016137,Cla022844,Cla020249
GO:0015684	ferrous iron transport	biological_process	0.48062	1	11	2218	74	15506	Cla020249,Cla022844,Cla016137,Cla022628,Cla021367,Cla012810,Cla010071,Cla009946,Cla001020,Cla009157,Cla008897
GO:0031929	TOR signaling	biological_process	0.48118	1	1	2218	4	15506	Cla011936
GO:0032006	regulation of TOR signaling	biological_process	0.48118	1	1	2218	4	15506	Cla011936
GO:0004425	indole-3-glycerol-phosphate synthase activity	molecular_function	0.48194	1	1	2218	4	15506	Cla017988
GO:0031974	membrane-enclosed lumen	cellular_component	0.48228	1	42	2218	288	15506	Cla021247,Cla018570,Cla013678,Cla005941,Cla017037,Cla014389,Cla014028,Cla023189,Cla023068,Cla017661,Cla002370,Cla017877,Cla017615,Cla017927,Cla007265,Cla013328,Novel01194,Cla013337,Cla009215,Cla014433,Cla002332,Cla006812,Cla010693,Cla015466,Novel00643,Cla014150,Cla021209,Cla018574,Cla021413,Cla007837,Cla008205,Cla023338,Cla004626,Cla020551,Cla011902,Cla004685,Cla007656,Cla022431,Cla000786,Cla0064…
GO:0051321	meiotic cell cycle	biological_process	0.48263	1	4	2218	25	15506	Cla014433,Cla008555,Cla022431,Cla007656
GO:0051920	peroxiredoxin activity	molecular_function	0.48609	1	1	2218	4	15506	Cla017646
GO:0072594	establishment of protein localization to organelle	biological_process	0.4867	1	20	2218	137	15506	Cla014028,Cla023201,Cla020337,Cla008887,Cla019070,Cla004074,Cla005583,Cla018895,Cla022698,Cla021734,Cla022686,Cla007369,Cla011011,Cla020551,Cla023321,Cla007370,Cla019797,Cla009478,Cla003667,Cla021256
GO:0003968	RNA-directed RNA polymerase activity	molecular_function	0.48755	1	6	2218	41	15506	Cla022806,Cla012972,Cla009133,Cla017266,Cla009401,Cla003960
GO:1902580	single-organism cellular localization	biological_process	0.48767	1	24	2218	165	15506	Cla007369,Cla017560,Cla022686,Cla023321,Cla020551,Cla011011,Cla003667,Cla009478,Cla019797,Cla007370,Cla021256,Cla016465,Cla022724,Cla023201,Cla014028,Cla019070,Cla004074,Cla020337,Novel00643,Cla008887,Cla018895,Cla005583,Cla021734,Cla022698
GO:0006948	induction by virus of host cell-cell fusion	biological_process	0.48863	1	1	2218	4	15506	Cla017615
GO:0015643	toxic substance binding	molecular_function	0.48867	1	1	2218	5	15506	Novel00268
GO:0030153	bacteriocin immunity	biological_process	0.48867	1	1	2218	5	15506	Novel00268
GO:0046332	SMAD binding	molecular_function	0.48892	1	1	2218	5	15506	Cla008692
GO:0034654	nucleobase-containing compound biosynthetic process	biological_process	0.48897	1	261	2218	1803	15506	Cla008294,Cla014433,Cla022076,Cla000813,Cla003999,Novel00471,Cla009670,Cla019316,Cla013766,Cla010875,Cla009557,Cla007817,Cla015498,Cla019304,Cla006484,Cla021378,Cla006791,Cla015804,Cla017266,Cla007837,Cla016822,Cla003005,Cla019971,Cla004274,Cla000701,Cla021016,Cla012284,Cla014048,Cla009215,Cla016577,Cla021592,Cla020816,Cla008066,Cla003644,Cla003575,Cla004714,Cla003774,Cla016590,Cla022679,Cla00765…
GO:0010383	cell wall polysaccharide metabolic process	biological_process	0.48906	1	1	2218	4	15506	Cla003262
GO:0010410	hemicellulose metabolic process	biological_process	0.48906	1	1	2218	4	15506	Cla003262
GO:0045491	xylan metabolic process	biological_process	0.48906	1	1	2218	4	15506	Cla003262
GO:0045493	xylan catabolic process	biological_process	0.48906	1	1	2218	4	15506	Cla003262
GO:0046559	alpha-glucuronidase activity	molecular_function	0.48906	1	1	2218	4	15506	Cla003262
GO:0006729	tetrahydrobiopterin biosynthetic process	biological_process	0.48961	1	1	2218	4	15506	Cla009745
GO:0008124	4-alpha-hydroxytetrahydrobiopterin dehydratase activity	molecular_function	0.48961	1	1	2218	4	15506	Cla009745
GO:0046146	tetrahydrobiopterin metabolic process	biological_process	0.48961	1	1	2218	4	15506	Cla009745
GO:0048193	Golgi vesicle transport	biological_process	0.49076	1	18	2218	123	15506	Cla005012,Cla012749,Cla015817,Cla006988,Cla014746,Cla021734,Cla004745,Cla021436,Cla007350,Cla017615,Cla013811,Cla008070,Cla015019,Cla016465,Cla008089,Novel01170,Cla004935,Cla009901
GO:0008081	phosphoric diester hydrolase activity	molecular_function	0.49139	1	4	2218	25	15506	Cla017877,Cla003262,Cla003276,Cla009242
GO:0001775	cell activation	biological_process	0.49162	1	8	2218	53	15506	Cla009478,Cla010900,Cla021734,Cla022333,Cla016791,Cla008555,Cla019993,Cla012636
GO:0006449	regulation of translational termination	biological_process	0.49184	1	1	2218	4	15506	Cla010217
GO:0006452	translational frameshifting	biological_process	0.49184	1	1	2218	4	15506	Cla010217
GO:0034250	positive regulation of cellular amide metabolic process	biological_process	0.49184	1	1	2218	4	15506	Cla010217
GO:0043243	positive regulation of protein complex disassembly	biological_process	0.49184	1	1	2218	4	15506	Cla010217
GO:0045727	positive regulation of translation	biological_process	0.49184	1	1	2218	4	15506	Cla010217
GO:0045901	positive regulation of translational elongation	biological_process	0.49184	1	1	2218	4	15506	Cla010217
GO:0045905	positive regulation of translational termination	biological_process	0.49184	1	1	2218	4	15506	Cla010217
GO:0009250	glucan biosynthetic process	biological_process	0.49434	1	9	2218	67	15506	Cla017384,Cla023286,Cla004473,Cla003320,Cla008465,Cla018547,Cla017383,Cla012972,Cla012973
GO:0006730	one-carbon metabolic process	biological_process	0.49442	1	1	2218	5	15506	Cla010547
GO:0008192	RNA guanylyltransferase activity	molecular_function	0.49501	1	1	2218	5	15506	Cla012928
GO:0070568	guanylyltransferase activity	molecular_function	0.49501	1	1	2218	5	15506	Cla012928
GO:0016192	vesicle-mediated transport	biological_process	0.49746	1	52	2218	381	15506	Cla008089,Cla005923,Cla009901,Cla016465,Cla013263,Cla015019,Cla008070,Cla015528,Cla007350,Cla014100,Cla017615,Cla021734,Cla007727,Cla014746,Cla018195,Cla012749,Cla003334,Cla002617,Cla016554,Cla021208,Cla015817,Cla018561,Cla018406,Cla009145,Cla019797,Cla013570,Novel01170,Cla004935,Cla021603,Cla013857,Cla018403,Cla008680,Cla012739,Cla009791,Cla013730,Cla021435,Cla016663,Cla013811,Cla012569,Cla01192…
GO:0004826	phenylalanine-tRNA ligase activity	molecular_function	0.49861	1	1	2218	5	15506	Cla006791
GO:0008443	phosphofructokinase activity	molecular_function	0.49976	1	4	2218	25	15506	Cla000798,Cla010079,Cla014418,Cla004847
GO:0008312	7S RNA binding	molecular_function	0.50054	1	2	2218	11	15506	Cla007370,Cla007369
GO:0048500	signal recognition particle	cellular_component	0.50054	1	2	2218	11	15506	Cla007369,Cla007370
GO:0033644	host cell membrane	cellular_component	0.50175	1	4	2218	27	15506	Cla014344,Cla016088,Cla019444,Cla012513
GO:0010243	response to organonitrogen compound	biological_process	0.50296	1	1	2218	5	15506	Cla011936
GO:0030076	light-harvesting complex	cellular_component	0.50318	1	1	2218	5	15506	Cla000199
GO:0050909	sensory perception of taste	biological_process	0.50344	1	1	2218	5	15506	Cla020286
GO:0006401	RNA catabolic process	biological_process	0.50451	1	3	2218	20	15506	Cla010280,Cla018240,Cla018469
GO:0006402	mRNA catabolic process	biological_process	0.50451	1	3	2218	20	15506	Cla010280,Cla018469,Cla018240
GO:0006605	protein targeting	biological_process	0.50672	1	23	2218	159	15506	Cla007369,Cla002625,Cla022686,Cla020551,Cla011011,Cla023321,Cla003667,Cla009478,Cla019797,Cla007370,Cla021256,Cla023201,Cla014028,Novel00643,Cla020337,Cla008887,Cla019070,Cla004074,Cla005583,Cla018895,Cla022698,Cla021734,Novel00688
GO:0000394	RNA splicing, via endonucleolytic cleavage and ligation	biological_process	0.50702	1	1	2218	5	15506	Cla005050
GO:0006388	tRNA splicing, via endonucleolytic cleavage and ligation	biological_process	0.50702	1	1	2218	5	15506	Cla005050
GO:0008649	rRNA methyltransferase activity	molecular_function	0.50706	1	2	2218	11	15506	Cla006029,Cla003471
GO:0005665	DNA-directed RNA polymerase II, core complex	cellular_component	0.50729	1	1	2218	5	15506	Cla023338
GO:0000375	RNA splicing, via transesterification reactions	biological_process	0.50784	1	11	2218	75	15506	Cla022051,Cla001799,Cla022397,Cla009557,Cla012958,Cla009059,Cla019971,Cla021647,Cla020056,Cla009632,Cla016436
GO:0048285	organelle fission	biological_process	0.50806	1	10	2218	67	15506	Cla008555,Cla007656,Cla022431,Cla013657,Cla021046,Cla016667,Cla006271,Cla006926,Cla014433,Cla021734
GO:0070206	protein trimerization	biological_process	0.50858	1	4	2218	25	15506	Cla009478,Cla022235,Cla021336,Cla003424
GO:0019049	evasion or tolerance of host defenses by virus	biological_process	0.50895	1	2	2218	12	15506	Cla019444,Cla004918
GO:0044448	cell cortex part	cellular_component	0.50915	1	10	2218	72	15506	Cla014100,Cla013651,Cla021734,Cla018561,Cla002617,Cla000258,Cla005012,Cla006136,Cla009145,Cla013263
GO:0022843	voltage-gated cation channel activity	molecular_function	0.50938	1	4	2218	26	15506	Novel01071,Cla009747,Cla020293,Cla001947
GO:0032786	positive regulation of DNA-templated transcription, elongation	biological_process	0.50962	1	2	2218	11	15506	Cla017734,Cla008676
GO:0032968	positive regulation of transcription elongation from RNA polymerase II promoter	biological_process	0.50962	1	2	2218	11	15506	Cla017734,Cla008676
GO:0034243	regulation of transcription elongation from RNA polymerase II promoter	biological_process	0.50962	1	2	2218	11	15506	Cla017734,Cla008676
GO:0030151	molybdenum ion binding	molecular_function	0.51015	1	2	2218	12	15506	Cla009899,Cla013473
GO:0016886	ligase activity, forming phosphoric ester bonds	molecular_function	0.51096	1	3	2218	20	15506	Cla017851,Cla005050,Cla008703
GO:0050790	regulation of catalytic activity	biological_process	0.51169	1	7	2218	46	15506	Cla013688,Cla008692,Cla011084,Cla006594,Cla012513,Cla021916,Cla016001
GO:0045321	leukocyte activation	biological_process	0.51189	1	1	2218	5	15506	Cla012636
GO:0003906	DNA-(apurinic or apyrimidinic site) lyase activity	molecular_function	0.51254	1	1	2218	5	15506	Cla005871
GO:0000030	mannosyltransferase activity	molecular_function	0.51259	1	1	2218	5	15506	Cla020743
GO:0042287	MHC protein binding	molecular_function	0.51326	1	1	2218	5	15506	Cla010205
GO:0042289	MHC class II protein binding	molecular_function	0.51326	1	1	2218	5	15506	Cla010205
GO:0006814	sodium ion transport	biological_process	0.51361	1	6	2218	41	15506	Novel00571,Cla002648,Cla008545,Cla019527,Novel00841,Cla013971
GO:0008080	N-acetyltransferase activity	molecular_function	0.51366	1	9	2218	60	15506	Cla022297,Cla014766,Cla015211,Cla014389,Cla020335,Cla020554,Cla016822,Cla007837,Cla021613
GO:0004806	triglyceride lipase activity	molecular_function	0.51492	1	2	2218	12	15506	Cla013617,Cla022306
GO:0004345	glucose-6-phosphate dehydrogenase activity	molecular_function	0.51523	1	1	2218	5	15506	Cla000612
GO:0034637	cellular carbohydrate biosynthetic process	biological_process	0.51544	1	14	2218	104	15506	Cla018547,Cla017383,Cla012972,Cla012973,Cla018918,Cla017384,Cla012748,Cla023286,Cla005675,Cla004473,Cla003320,Cla008123,Novel01098,Cla008465
GO:0042546	cell wall biogenesis	biological_process	0.5157	1	3	2218	19	15506	Cla010205,Cla018595,Cla018548
GO:0030269	tetrahydromethanopterin S-methyltransferase activity	molecular_function	0.51654	1	2	2218	12	15506	Cla012753,Cla006797
GO:0042086	5-methyl-5,6,7,8-tetrahydromethanopterin-dependent methyltransferase activity	molecular_function	0.51654	1	2	2218	12	15506	Cla012753,Cla006797
GO:0006470	protein dephosphorylation	biological_process	0.51698	1	5	2218	33	15506	Cla010030,Cla011058,Cla013973,Cla009377,Cla013695
GO:0006635	fatty acid beta-oxidation	biological_process	0.51891	1	1	2218	5	15506	Cla003665
GO:0009062	fatty acid catabolic process	biological_process	0.51891	1	1	2218	5	15506	Cla003665
GO:0019395	fatty acid oxidation	biological_process	0.51891	1	1	2218	5	15506	Cla003665
GO:0034440	lipid oxidation	biological_process	0.51891	1	1	2218	5	15506	Cla003665
GO:0016772	transferase activity, transferring phosphorus-containing groups	molecular_function	0.51908	1	210	2218	1560	15506	Cla001321,Cla018530,Cla005858,Cla017316,Cla004278,Cla016945,Cla005491,Cla014418,Cla012636,Cla004881,Cla010280,Cla010644,Cla003339,Cla018314,Cla012827,Cla004677,Cla007229,Cla008332,Cla016117,Cla014632,Cla004847,Cla008861,Cla003999,Cla008122,Cla005412,Cla013877,Cla008614,Cla012928,Cla013268,Cla009043,Cla021717,Cla016802,Cla006484,Cla016842,Cla007817,Cla015498,Cla010754,Cla009879,Cla000850,Cla016690…
GO:0004129	cytochrome-c oxidase activity	molecular_function	0.51948	1	6	2218	39	15506	Cla001181,Cla000525,Novel01194,Cla022868,Cla008029,Cla012694
GO:0016675	oxidoreductase activity, acting on a heme group of donors	molecular_function	0.51948	1	6	2218	39	15506	Cla008029,Cla012694,Cla000525,Cla001181,Cla022868,Novel01194
GO:0016676	oxidoreductase activity, acting on a heme group of donors, oxygen as acceptor	molecular_function	0.51948	1	6	2218	39	15506	Cla012694,Cla008029,Novel01194,Cla022868,Cla000525,Cla001181
GO:0003682	chromatin binding	molecular_function	0.51955	1	6	2218	41	15506	Cla003005,Cla001468,Cla017063,Cla020670,Cla011448,Cla000897
GO:1902533	positive regulation of intracellular signal transduction	biological_process	0.51992	1	3	2218	19	15506	Cla011936,Cla013877,Cla020604
GO:0006551	leucine metabolic process	biological_process	0.52133	1	1	2218	5	15506	Cla018253
GO:0009098	leucine biosynthetic process	biological_process	0.52133	1	1	2218	5	15506	Cla018253
GO:0019385	methanogenesis, from acetate	biological_process	0.52156	1	1	2218	5	15506	Cla008389
GO:0005795	Golgi stack	cellular_component	0.52176	1	1	2218	5	15506	Cla015692
GO:0005985	sucrose metabolic process	biological_process	0.52206	1	2	2218	13	15506	Cla011131,Cla018918
GO:0019073	viral DNA genome packaging	biological_process	0.52221	1	1	2218	5	15506	Cla000543
GO:1902590	multi-organism organelle organization	biological_process	0.52221	1	1	2218	5	15506	Cla000543
GO:0072527	pyrimidine-containing compound metabolic process	biological_process	0.52537	1	6	2218	40	15506	Cla009301,Cla022500,Novel01082,Cla016577,Cla005471,Cla009782
GO:0043241	protein complex disassembly	biological_process	0.52621	1	4	2218	26	15506	Cla005690,Cla018955,Cla019797,Cla010217
GO:0048278	vesicle docking	biological_process	0.5263	1	5	2218	36	15506	Cla020354,Cla014100,Cla021208,Cla013857,Cla005012
GO:0017108	5'-flap endonuclease activity	molecular_function	0.52649	1	1	2218	5	15506	Cla004626
GO:0033557	Slx1-Slx4 complex	cellular_component	0.52649	1	1	2218	5	15506	Cla004626
GO:0048256	flap endonuclease activity	molecular_function	0.52649	1	1	2218	5	15506	Cla004626
GO:0019200	carbohydrate kinase activity	molecular_function	0.52741	1	4	2218	26	15506	Cla010079,Cla000798,Cla004847,Cla014418
GO:0003919	FMN adenylyltransferase activity	molecular_function	0.52833	1	1	2218	5	15506	Cla020047
GO:0097159	organic cyclic compound binding	molecular_function	0.52875	1	683	2218	4900	15506	Cla008058,Cla005549,Cla021867,Cla012553,Cla021742,Cla014389,Cla008434,Cla003535,Cla007518,Cla020366,Cla001861,Cla017212,Cla022628,Cla022879,Cla006812,Cla016644,Cla009301,Novel01280,Cla019110,Cla010596,Cla021806,Cla005583,Cla001216,Cla010071,Cla019909,Cla007424,Cla019837,Cla014131,Cla004159,Cla010678,Cla021617,Cla015968,Cla018293,Cla015725,Cla001947,Cla020214,Cla000798,Cla010932,Cla019498,Cla00392…
GO:1901363	heterocyclic compound binding	molecular_function	0.52875	1	683	2218	4900	15506	Cla013485,Cla015028,Cla016802,Cla009043,Novel00586,Cla000850,Cla010171,Cla014475,Cla023338,Cla008584,Cla014239,Cla019185,Cla017988,Cla014262,Cla014265,Cla022698,Cla011016,Cla011870,Cla009746,Cla013777,Cla013341,Novel00448,Cla004220,Cla015666,Cla005012,Cla016566,Cla009035,Cla006103,Cla018520,Cla011810,Cla000933,Cla007369,Cla018438,Cla017851,Cla018314,Cla003339,Cla010644,Cla005375,Cla001251,Cla0155…
GO:0048511	rhythmic process	biological_process	0.52992	1	2	2218	12	15506	Cla014766,Cla019380
GO:0006414	translational elongation	biological_process	0.53043	1	3	2218	19	15506	Cla010217,Cla018049,Cla013147
GO:0044391	ribosomal subunit	cellular_component	0.53076	1	3	2218	19	15506	Cla021413,Cla023068,Novel00643
GO:0019354	siroheme biosynthetic process	biological_process	0.53128	1	7	2218	47	15506	Cla004284,Cla020476,Cla004245,Cla010547,Cla002517,Cla001251,Cla007434
GO:0043115	precorrin-2 dehydrogenase activity	molecular_function	0.53128	1	7	2218	47	15506	Cla010547,Cla002517,Cla004245,Cla020476,Cla004284,Cla007434,Cla001251
GO:0046156	siroheme metabolic process	biological_process	0.53128	1	7	2218	47	15506	Cla001251,Cla007434,Cla004284,Cla020476,Cla010547,Cla004245,Cla002517
GO:0010207	photosystem II assembly	biological_process	0.5323	1	1	2218	5	15506	Cla007720
GO:0007165	signal transduction	biological_process	0.53236	1	106	2218	749	15506	Cla020604,Cla005603,Cla016336,Cla009157,Cla007461,Cla020469,Cla008555,Cla008434,Cla012743,Cla014048,Cla011536,Cla010363,Cla017212,Cla012434,Cla015527,Cla004665,Cla002033,Cla018469,Cla010285,Cla022563,Cla020286,Cla022628,Novel00908,Cla005612,Novel00689,Novel00411,Cla009301,Cla019958,Cla017875,Cla015534,Cla021016,Cla022333,Cla017255,Cla009676,Cla012278,Cla019293,Cla016110,Cla022043,Cla010071,Cla019…
GO:0004867	serine-type endopeptidase inhibitor activity	molecular_function	0.5329	1	5	2218	32	15506	Cla010142,Cla021559,Cla002286,Cla006433,Novel00957
GO:0004064	arylesterase activity	molecular_function	0.53359	1	1	2218	5	15506	Cla005157
GO:0006898	receptor-mediated endocytosis	biological_process	0.53479	1	1	2218	5	15506	Cla012739
GO:0046915	transition metal ion transmembrane transporter activity	molecular_function	0.53503	1	15	2218	106	15506	Cla015211,Cla008897,Cla019977,Cla001020,Cla009946,Cla009157,Cla021367,Cla022628,Cla012011,Cla010071,Cla012810,Cla020249,Cla022844,Cla011094,Cla016137
GO:0019104	DNA N-glycosylase activity	molecular_function	0.53668	1	2	2218	12	15506	Cla015323,Cla020743
GO:0000302	response to reactive oxygen species	biological_process	0.53832	1	1	2218	5	15506	Cla020761
GO:1901031	regulation of response to reactive oxygen species	biological_process	0.53832	1	1	2218	5	15506	Cla020761
GO:1902882	regulation of response to oxidative stress	biological_process	0.53832	1	1	2218	5	15506	Cla020761
GO:0005938	cell cortex	cellular_component	0.53839	1	10	2218	74	15506	Cla013651,Cla021734,Cla014100,Cla009145,Cla005012,Cla006136,Cla000258,Cla013263,Cla018561,Cla002617
GO:0009279	cell outer membrane	cellular_component	0.53992	1	1	2218	5	15506	Cla002376
GO:0006370	7-methylguanosine mRNA capping	biological_process	0.54119	1	1	2218	5	15506	Cla016822
GO:0008108	UDP-glucose:hexose-1-phosphate uridylyltransferase activity	molecular_function	0.54184	1	1	2218	5	15506	Cla021208
GO:0030915	Smc5-Smc6 complex	cellular_component	0.54231	1	1	2218	5	15506	Cla003146
GO:0019842	vitamin binding	molecular_function	0.54304	1	6	2218	42	15506	Cla013777,Cla018514,Cla006743,Cla019909,Cla009347,Cla018097
GO:0016573	histone acetylation	biological_process	0.54375	1	1	2218	5	15506	Cla007837
GO:0030155	regulation of cell adhesion	biological_process	0.5444	1	1	2218	5	15506	Cla009901
GO:0000724	double-strand break repair via homologous recombination	biological_process	0.54516	1	1	2218	5	15506	Cla019611
GO:0005577	fibrinogen complex	cellular_component	0.54592	1	7	2218	48	15506	Cla010900,Cla021734,Cla022333,Cla016791,Cla019993,Cla008555,Cla009478
GO:0030168	platelet activation	biological_process	0.54592	1	7	2218	48	15506	Cla009478,Cla008555,Cla019993,Cla016791,Cla022333,Cla021734,Cla010900
GO:0000062	fatty-acyl-CoA binding	molecular_function	0.54695	1	1	2218	5	15506	Cla004886
GO:0008380	RNA splicing	biological_process	0.54697	1	12	2218	85	15506	Cla019971,Cla016436,Cla021647,Cla020056,Cla009632,Cla005050,Cla022051,Cla022397,Cla009557,Cla001799,Cla009059,Cla012958
GO:0045156	electron transporter, transferring electrons within the cyclic electron transport pathway of photosynthesis activity	molecular_function	0.54711	1	1	2218	5	15506	Cla000199
GO:0004402	histone acetyltransferase activity	molecular_function	0.54721	1	2	2218	12	15506	Cla016822,Cla007837
GO:0010466	negative regulation of peptidase activity	biological_process	0.54754	1	1	2218	5	15506	Cla008692
GO:0010951	negative regulation of endopeptidase activity	biological_process	0.54754	1	1	2218	5	15506	Cla008692
GO:0052547	regulation of peptidase activity	biological_process	0.54754	1	1	2218	5	15506	Cla008692
GO:0052548	regulation of endopeptidase activity	biological_process	0.54754	1	1	2218	5	15506	Cla008692
GO:0051259	protein oligomerization	biological_process	0.54767	1	7	2218	48	15506	Cla018730,Cla021336,Cla018293,Cla003424,Cla012117,Cla009478,Cla022235
GO:0007009	plasma membrane organization	biological_process	0.54783	1	2	2218	13	15506	Cla016465,Novel01170
GO:0003830	beta-1,4-mannosylglycoprotein 4-beta-N-acetylglucosaminyltransferase activity	molecular_function	0.54821	1	1	2218	5	15506	Cla000921
GO:0004026	alcohol O-acetyltransferase activity	molecular_function	0.54868	1	1	2218	5	15506	Cla016366
GO:0034318	alcohol O-acyltransferase activity	molecular_function	0.54868	1	1	2218	5	15506	Cla016366
GO:0030674	protein binding, bridging	molecular_function	0.54876	1	8	2218	55	15506	Cla019993,Cla008555,Cla022333,Cla016791,Cla010142,Cla021734,Cla010900,Cla009478
GO:0060090	binding, bridging	molecular_function	0.54876	1	8	2218	55	15506	Cla008555,Cla019993,Cla016791,Cla010142,Cla022333,Cla009478,Cla021734,Cla010900
GO:0015267	channel activity	molecular_function	0.54934	1	22	2218	165	15506	Cla009044,Cla018794,Novel01071,Cla013337,Cla004473,Cla001947,Cla009747,Cla008341,Cla010562,Cla012513,Cla012411,Cla014150,Cla017037,Cla021209,Cla003334,Cla007674,Cla014389,Cla003303,Cla010691,Cla023225,Cla016926,Cla020293
GO:0022803	passive transmembrane transporter activity	molecular_function	0.54934	1	22	2218	165	15506	Cla009044,Cla018794,Novel01071,Cla013337,Cla004473,Cla001947,Cla008341,Cla009747,Cla010562,Cla012411,Cla012513,Cla014150,Cla021209,Cla003334,Cla017037,Cla007674,Cla014389,Cla003303,Cla010691,Cla023225,Cla016926,Cla020293
GO:0044700	single organism signaling	biological_process	0.54964	1	107	2218	759	15506	Cla005375,Novel00518,Cla019645,Cla012827,Cla017615,Cla016137,Cla021734,Cla020858,Cla008918,Cla021997,Cla008332,Cla010723,Cla023215,Cla011936,Cla014899,Cla005899,Cla013188,Cla013877,Cla009478,Cla018210,Cla003947,Cla005491,Novel01119,Cla010079,Cla004222,Novel01240,Cla007427,Cla022303,Cla012575,Cla010900,Cla009259,Cla011016,Cla015337,Cla016791,Cla019885,Novel00249,Cla002891,Cla022844,Cla010793,Cla01…
GO:0000271	polysaccharide biosynthetic process	biological_process	0.54976	1	11	2218	84	15506	Cla012972,Cla018547,Cla017383,Cla012973,Cla023286,Cla012748,Cla017384,Cla003320,Novel01098,Cla008465,Cla004473
GO:0031023	microtubule organizing center organization	biological_process	0.55065	1	2	2218	13	15506	Cla009478,Cla012513
GO:0065009	regulation of molecular function	biological_process	0.55143	1	8	2218	55	15506	Cla012513,Cla015647,Cla006594,Cla016001,Cla013688,Cla021916,Cla008692,Cla011084
GO:0004675	transmembrane receptor protein serine/threonine kinase activity	molecular_function	0.55267	1	1	2218	5	15506	Cla007745
GO:0016568	chromatin modification	biological_process	0.55282	1	17	2218	117	15506	Cla017463,Cla013668,Cla010413,Cla015604,Cla007846,Cla021209,Cla012519,Cla014389,Cla018574,Cla006761,Cla019199,Cla016980,Cla015165,Cla010722,Cla007837,Cla016822,Cla001643
GO:0009070	serine family amino acid biosynthetic process	biological_process	0.55286	1	1	2218	5	15506	Cla016577
GO:0070603	SWI/SNF superfamily-type complex	cellular_component	0.55307	1	1	2218	5	15506	Cla001643
GO:0007217	tachykinin receptor signaling pathway	biological_process	0.55381	1	1	2218	5	15506	Cla019217
GO:0004652	polynucleotide adenylyltransferase activity	molecular_function	0.55417	1	1	2218	6	15506	Cla010754
GO:0016641	oxidoreductase activity, acting on the CH-NH2 group of donors, oxygen as acceptor	molecular_function	0.5542	1	2	2218	14	15506	Cla012129,Cla008070
GO:0045300	acyl-[acyl-carrier-protein] desaturase activity	molecular_function	0.5544	1	1	2218	5	15506	Cla013862
GO:0000413	protein peptidyl-prolyl isomerization	biological_process	0.55537	1	4	2218	26	15506	Cla001502,Cla013600,Cla013362,Cla017086
GO:0003755	peptidyl-prolyl cis-trans isomerase activity	molecular_function	0.55537	1	4	2218	26	15506	Cla001502,Cla013600,Cla013362,Cla017086
GO:0016859	cis-trans isomerase activity	molecular_function	0.55537	1	4	2218	26	15506	Cla017086,Cla013362,Cla013600,Cla001502
GO:0018208	peptidyl-proline modification	biological_process	0.55537	1	4	2218	26	15506	Cla013600,Cla001502,Cla013362,Cla017086
GO:0008645	hexose transport	biological_process	0.55539	1	1	2218	6	15506	Novel00838
GO:0015749	monosaccharide transport	biological_process	0.55539	1	1	2218	6	15506	Novel00838
GO:0015297	antiporter activity	molecular_function	0.55567	1	12	2218	88	15506	Cla014122,Cla012949,Cla003275,Cla016601,Cla011528,Cla001746,Cla004949,Cla015755,Cla020435,Cla021250,Cla015240,Cla016600
GO:0042537	benzene-containing compound metabolic process	biological_process	0.55704	1	1	2218	5	15506	Cla016041
GO:0016717	oxidoreductase activity, acting on paired donors, with oxidation of a pair of donors resulting in the reduction of molecular oxygen to two molecules of water	molecular_function	0.55728	1	2	2218	12	15506	Cla008817,Cla013862
GO:0004861	cyclin-dependent protein serine/threonine kinase inhibitor activity	molecular_function	0.55753	1	2	2218	12	15506	Cla014032,Cla020190
GO:0044433	cytoplasmic vesicle part	cellular_component	0.55897	1	8	2218	58	15506	Cla011920,Cla000199,Cla013570,Cla006988,Cla016554,Cla018406,Cla008070,Cla012569
GO:0023052	signaling	biological_process	0.55987	1	107	2218	761	15506	Cla023215,Cla010723,Cla011936,Cla014899,Cla005899,Cla013877,Cla013188,Novel00518,Cla017615,Cla019645,Cla012827,Cla005375,Cla008918,Cla021997,Cla008332,Cla016137,Cla021734,Cla020858,Cla010079,Novel01119,Cla004222,Cla018210,Cla009478,Cla003947,Cla005491,Cla016791,Cla019885,Cla011016,Cla015337,Novel00249,Cla022303,Cla012575,Novel01240,Cla007427,Cla009259,Cla010900,Cla004747,Cla007817,Cla018049,Cla01…
GO:0006099	tricarboxylic acid cycle	biological_process	0.55997	1	2	2218	13	15506	Cla000142,Cla002312
GO:0006101	citrate metabolic process	biological_process	0.55997	1	2	2218	13	15506	Cla000142,Cla002312
GO:0045944	positive regulation of transcription from RNA polymerase II promoter	biological_process	0.56018	1	2	2218	12	15506	Cla017734,Cla008676
GO:0005986	sucrose biosynthetic process	biological_process	0.56067	1	1	2218	5	15506	Cla018918
GO:0050307	sucrose-phosphate phosphatase activity	molecular_function	0.56067	1	1	2218	5	15506	Cla018918
GO:0043227	membrane-bounded organelle	cellular_component	0.56163	1	292	2218	2044	15506	Cla014905,Cla006484,Cla008387,Cla016436,Cla022868,Cla013766,Cla008205,Cla009094,Cla003005,Cla007837,Cla019971,Cla022278,Cla006791,Cla020558,Cla017450,Cla000667,Cla014815,Cla008113,Cla010413,Cla003667,Cla022076,Cla021078,Cla018666,Cla021795,Cla006870,Cla014433,Cla016465,Cla008070,Cla011011,Cla010722,Cla017661,Novel00933,Cla003999,Cla011936,Novel00471,Cla000813,Cla019199,Cla013678,Cla006761,Cla0166…
GO:0043231	intracellular membrane-bounded organelle	cellular_component	0.56163	1	292	2218	2044	15506	Cla007350,Cla010423,Cla005761,Cla018436,Cla023189,Cla017444,Cla012958,Novel00273,Cla001181,Cla016554,Cla005031,Cla004074,Cla017742,Cla018210,Cla013335,Cla023484,Cla012694,Cla000691,Cla013337,Cla013688,Cla006136,Cla015647,Cla020190,Novel01111,Cla016926,Cla011341,Cla022235,Cla012519,Cla015963,Cla013657,Cla013570,Cla007846,Cla004935,Cla007370,Cla022724,Cla020053,Cla017463,Cla015497,Novel01239,Novel0…
GO:0005543	phospholipid binding	molecular_function	0.56185	1	7	2218	50	15506	Cla009281,Cla018409,Cla001954,Cla009948,Cla023002,Cla005909,Cla016903
GO:0003918	DNA topoisomerase type II (ATP-hydrolyzing) activity	molecular_function	0.56194	1	3	2218	20	15506	Cla012105,Cla012104,Cla016531
GO:0061505	DNA topoisomerase II activity	molecular_function	0.56194	1	3	2218	20	15506	Cla012105,Cla012104,Cla016531
GO:0004357	glutamate-cysteine ligase activity	molecular_function	0.56311	1	1	2218	6	15506	Cla017814
GO:0005244	voltage-gated ion channel activity	molecular_function	0.56349	1	5	2218	36	15506	Cla009044,Cla001947,Cla009747,Novel01071,Cla020293
GO:0022832	voltage-gated channel activity	molecular_function	0.56349	1	5	2218	36	15506	Cla001947,Cla020293,Novel01071,Cla009747,Cla009044
GO:0019684	photosynthesis, light reaction	biological_process	0.56429	1	3	2218	20	15506	Cla000199,Cla006317,Cla007720
GO:0015097	mercury ion transmembrane transporter activity	molecular_function	0.56504	1	1	2218	6	15506	Cla012011
GO:0015694	mercury ion transport	biological_process	0.56504	1	1	2218	6	15506	Cla012011
GO:0046689	response to mercury ion	biological_process	0.56504	1	1	2218	6	15506	Cla012011
GO:0050787	detoxification of mercury ion	biological_process	0.56504	1	1	2218	6	15506	Cla012011
GO:0061687	detoxification of inorganic compound	biological_process	0.56504	1	1	2218	6	15506	Cla012011
GO:0098754	detoxification	biological_process	0.56504	1	1	2218	6	15506	Cla012011
GO:0006858	extracellular transport	biological_process	0.56529	1	1	2218	5	15506	Cla017222
GO:0043233	organelle lumen	cellular_component	0.56632	1	40	2218	283	15506	Cla014028,Cla014389,Cla005941,Cla017037,Cla018570,Cla013678,Cla021247,Cla017927,Cla017615,Cla017877,Cla023189,Cla023068,Cla017661,Cla002370,Cla007265,Cla013328,Cla010693,Cla002332,Cla006812,Cla009215,Cla014433,Cla013337,Cla018574,Cla021413,Cla021209,Novel00643,Cla014150,Cla008205,Cla007837,Cla007656,Cla022431,Cla004685,Cla020551,Cla011902,Cla023338,Cla004626,Cla008341,Cla006484,Cla019797,Cla000786
GO:0070013	intracellular organelle lumen	cellular_component	0.56632	1	40	2218	283	15506	Cla000786,Cla019797,Cla006484,Cla008341,Cla004626,Cla023338,Cla011902,Cla020551,Cla004685,Cla022431,Cla007656,Cla007837,Cla008205,Cla014150,Novel00643,Cla021209,Cla021413,Cla018574,Cla013337,Cla014433,Cla009215,Cla006812,Cla002332,Cla010693,Cla013328,Cla007265,Cla017661,Cla002370,Cla023068,Cla023189,Cla017877,Cla017927,Cla017615,Cla021247,Cla018570,Cla013678,Cla017037,Cla005941,Cla014389,Cla014028
GO:0003729	mRNA binding	molecular_function	0.56716	1	2	2218	13	15506	Cla021247,Cla018240
GO:0044822	poly(A) RNA binding	molecular_function	0.56716	1	2	2218	13	15506	Cla021247,Cla018240
GO:0004315	3-oxoacyl-[acyl-carrier-protein] synthase activity	molecular_function	0.56772	1	3	2218	20	15506	Cla005852,Cla017158,Cla011561
GO:0046474	glycerophospholipid biosynthetic process	biological_process	0.56827	1	5	2218	36	15506	Cla006940,Cla016167,Cla008975,Cla020432,Cla000539
GO:0044093	positive regulation of molecular function	biological_process	0.5685	1	1	2218	5	15506	Cla021916
GO:0006750	glutathione biosynthetic process	biological_process	0.56854	1	1	2218	6	15506	Cla017814
GO:0007596	blood coagulation	biological_process	0.5687	1	7	2218	49	15506	Cla010900,Cla021734,Cla009478,Cla022333,Cla016791,Cla008555,Cla019993
GO:0016799	hydrolase activity, hydrolyzing N-glycosyl compounds	molecular_function	0.56885	1	3	2218	20	15506	Cla020743,Cla015323,Cla005871
GO:0019748	secondary metabolic process	biological_process	0.56987	1	3	2218	21	15506	Cla001225,Cla013903,Novel00268
GO:0015994	chlorophyll metabolic process	biological_process	0.57035	1	7	2218	47	15506	Cla022442,Cla010255,Cla018433,Cla017396,Cla016861,Cla008210,Cla010253
GO:0010340	carboxyl-O-methyltransferase activity	molecular_function	0.57081	1	5	2218	34	15506	Cla006932,Cla018460,Cla008222,Cla023413,Cla011228
GO:0051998	protein carboxyl O-methyltransferase activity	molecular_function	0.57081	1	5	2218	34	15506	Cla008222,Cla023413,Cla011228,Cla018460,Cla006932
GO:0039526	modulation by virus of host apoptotic process	biological_process	0.57129	1	1	2218	5	15506	Cla016176
GO:0044531	modulation of programmed cell death in other organism	biological_process	0.57129	1	1	2218	5	15506	Cla016176
GO:0044532	modulation of apoptotic process in other organism	biological_process	0.57129	1	1	2218	5	15506	Cla016176
GO:0052040	modulation by symbiont of host programmed cell death	biological_process	0.57129	1	1	2218	5	15506	Cla016176
GO:0052150	modulation by symbiont of host apoptotic process	biological_process	0.57129	1	1	2218	5	15506	Cla016176
GO:0052248	modulation of programmed cell death in other organism involved in symbiotic interaction	biological_process	0.57129	1	1	2218	5	15506	Cla016176
GO:0052433	modulation by organism of apoptotic process in other organism involved in symbiotic interaction	biological_process	0.57129	1	1	2218	5	15506	Cla016176
GO:0009415	response to water	biological_process	0.57186	1	2	2218	12	15506	Cla021949,Cla021379
GO:0009611	response to wounding	biological_process	0.57234	1	10	2218	70	15506	Cla010900,Cla021734,Cla021559,Cla009478,Novel00957,Cla003276,Cla022333,Cla016791,Cla008555,Cla019993
GO:0007268	synaptic transmission	biological_process	0.5731	1	2	2218	13	15506	Novel01240,Cla019217
GO:0005246	calcium channel regulator activity	molecular_function	0.57355	1	3	2218	22	15506	Novel00255,Cla001829,Cla022107
GO:0008641	small protein activating enzyme activity	molecular_function	0.57374	1	3	2218	20	15506	Cla002631,Cla021327,Cla013382
GO:0006865	amino acid transport	biological_process	0.57509	1	6	2218	43	15506	Cla012146,Cla000539,Cla007265,Cla002221,Cla003221,Cla019527
GO:0006284	base-excision repair	biological_process	0.57636	1	3	2218	21	15506	Cla020743,Cla015323,Cla007972
GO:0042060	wound healing	biological_process	0.57665	1	8	2218	57	15506	Cla010900,Cla021734,Cla009478,Cla003276,Cla016791,Cla022333,Cla008555,Cla019993
GO:0001932	regulation of protein phosphorylation	biological_process	0.57792	1	2	2218	13	15506	Cla011936,Cla006594
GO:0006471	protein ADP-ribosylation	biological_process	0.57885	1	1	2218	6	15506	Cla005994
GO:0000124	SAGA complex	cellular_component	0.57917	1	1	2218	6	15506	Cla008205
GO:0005787	signal peptidase complex	cellular_component	0.5798	1	2	2218	13	15506	Cla005247,Cla022977
GO:0006465	signal peptide processing	biological_process	0.5798	1	2	2218	13	15506	Cla005247,Cla022977
GO:0016728	oxidoreductase activity, acting on CH or CH2 groups, disulfide as acceptor	molecular_function	0.58007	1	1	2218	6	15506	Cla021037
GO:1901698	response to nitrogen compound	biological_process	0.58011	1	1	2218	6	15506	Cla011936
GO:0044380	protein localization to cytoskeleton	biological_process	0.58126	1	1	2218	6	15506	Cla009478
GO:0071988	protein localization to spindle pole body	biological_process	0.58126	1	1	2218	6	15506	Cla009478
GO:0072698	protein localization to microtubule cytoskeleton	biological_process	0.58126	1	1	2218	6	15506	Cla009478
GO:0007338	single fertilization	biological_process	0.58153	1	1	2218	6	15506	Cla018594
GO:0009566	fertilization	biological_process	0.58153	1	1	2218	6	15506	Cla018594
GO:1902495	transmembrane transporter complex	cellular_component	0.58278	1	3	2218	20	15506	Cla017692,Cla011555,Cla020955
GO:1990351	transporter complex	cellular_component	0.58278	1	3	2218	20	15506	Cla017692,Cla011555,Cla020955
GO:0000103	sulfate assimilation	biological_process	0.58387	1	3	2218	22	15506	Cla021256,Cla008501,Cla011367
GO:0004020	adenylylsulfate kinase activity	molecular_function	0.58387	1	3	2218	22	15506	Cla011367,Cla008501,Cla021256
GO:0002161	aminoacyl-tRNA editing activity	molecular_function	0.58388	1	1	2218	7	15506	Cla021742
GO:0030976	thiamine pyrophosphate binding	molecular_function	0.58494	1	4	2218	29	15506	Cla009347,Cla006743,Cla018514,Cla013777
GO:0046873	metal ion transmembrane transporter activity	molecular_function	0.58589	1	39	2218	282	15506	Cla022628,Cla009747,Novel01071,Cla019612,Cla002648,Cla009946,Cla012011,Novel00404,Cla016137,Cla014389,Cla017037,Cla009157,Cla001947,Cla010562,Cla008341,Cla011094,Cla022844,Cla019527,Cla020249,Cla005619,Cla022678,Novel00571,Cla019977,Cla008897,Cla016901,Novel00841,Cla001020,Cla015484,Cla021405,Cla021367,Cla020293,Cla012810,Cla010071,Cla010691,Cla013374,Cla015211,Cla021209,Cla020867,Cla014150
GO:0003849	3-deoxy-7-phosphoheptulonate synthase activity	molecular_function	0.58667	1	1	2218	6	15506	Cla005344
GO:0044242	cellular lipid catabolic process	biological_process	0.58682	1	1	2218	6	15506	Cla003665
GO:0000377	RNA splicing, via transesterification reactions with bulged adenosine as nucleophile	biological_process	0.58704	1	8	2218	56	15506	Cla022051,Cla001799,Cla022397,Cla009059,Cla012958,Cla020056,Cla016436,Cla009632
GO:0000398	mRNA splicing, via spliceosome	biological_process	0.58704	1	8	2218	56	15506	Cla022051,Cla001799,Cla022397,Cla009059,Cla012958,Cla020056,Cla016436,Cla009632
GO:0031514	motile cilium	cellular_component	0.58711	1	6	2218	42	15506	Cla022644,Cla013730,Cla003885,Cla012749,Cla019297,Cla008089
GO:0008948	oxaloacetate decarboxylase activity	molecular_function	0.58712	1	3	2218	22	15506	Novel00571,Cla002648,Novel00841
GO:0035725	sodium ion transmembrane transport	biological_process	0.58712	1	3	2218	22	15506	Novel00571,Cla002648,Novel00841
GO:0071436	sodium ion export	biological_process	0.58712	1	3	2218	22	15506	Novel00841,Cla002648,Novel00571
GO:0042025	host cell nucleus	cellular_component	0.58718	1	9	2218	64	15506	Cla021147,Cla019304,Cla020053,Novel00317,Cla020047,Cla016176,Cla003300,Cla008294,Cla009282
GO:0006188	IMP biosynthetic process	biological_process	0.58729	1	1	2218	6	15506	Cla011996
GO:0046040	IMP metabolic process	biological_process	0.58729	1	1	2218	6	15506	Cla011996
GO:0005201	extracellular matrix structural constituent	molecular_function	0.58812	1	1	2218	6	15506	Cla020798
GO:0006260	DNA replication	biological_process	0.58885	1	46	2218	329	15506	Cla004257,Cla014389,Cla017037,Cla012749,Cla004029,Cla015276,Cla003084,Cla007696,Cla021734,Cla007950,Cla017734,Cla015019,Cla017851,Cla015001,Cla004278,Cla014422,Cla014433,Cla021037,Cla022644,Cla001476,Cla014048,Cla013337,Cla021209,Cla017202,Cla012411,Novel01240,Cla021436,Cla004874,Cla015802,Cla011341,Cla008863,Cla001518,Cla014239,Cla001020,Cla004626,Cla014303,Cla009670,Cla016385,Cla015898,Cla00834…
GO:0048038	quinone binding	molecular_function	0.58911	1	2	2218	15	15506	Cla016644,Cla008329
GO:0019882	antigen processing and presentation	biological_process	0.58917	1	1	2218	6	15506	Cla010205
GO:0048869	cellular developmental process	biological_process	0.59073	1	12	2218	89	15506	Cla000858,Novel00827,Cla006484,Cla009901,Cla004677,Cla012513,Cla015431,Cla022386,Novel00293,Cla004747,Cla008434,Cla004683
GO:0005216	ion channel activity	molecular_function	0.59079	1	21	2218	161	15506	Cla014150,Cla012513,Cla012411,Cla014389,Cla007674,Cla021209,Cla017037,Cla003334,Cla016926,Cla023225,Cla010691,Cla003303,Cla020293,Cla009044,Novel01071,Cla018794,Cla009747,Cla008341,Cla010562,Cla001947,Cla004473
GO:0022838	substrate-specific channel activity	molecular_function	0.59079	1	21	2218	161	15506	Cla014389,Cla007674,Cla021209,Cla003334,Cla017037,Cla014150,Cla012513,Cla012411,Cla020293,Cla023225,Cla016926,Cla010691,Cla003303,Novel01071,Cla018794,Cla009044,Cla008341,Cla009747,Cla010562,Cla001947,Cla004473
GO:0015850	organic hydroxy compound transport	biological_process	0.59224	1	1	2218	6	15506	Cla019444
GO:0015002	heme-copper terminal oxidase activity	molecular_function	0.59247	1	6	2218	42	15506	Cla012694,Cla008029,Cla022868,Novel01194,Cla000525,Cla001181
GO:0046660	female sex differentiation	biological_process	0.59307	1	1	2218	6	15506	Cla011409
GO:0009317	acetyl-CoA carboxylase complex	cellular_component	0.59308	1	1	2218	6	15506	Cla018129
GO:0007154	cell communication	biological_process	0.59352	1	115	2218	826	15506	Novel00249,Cla016791,Cla019885,Cla015337,Cla011016,Cla009259,Cla010900,Cla007714,Cla022303,Cla012575,Cla007427,Novel01240,Cla003237,Cla013455,Cla018576,Cla010171,Novel01082,Cla004747,Cla018049,Cla007817,Cla007709,Cla016690,Cla022844,Cla010793,Cla002891,Cla019376,Cla013188,Cla013877,Cla005899,Cla010723,Cla023215,Cla011936,Cla014899,Cla008918,Cla021997,Cla008332,Cla016137,Cla020858,Cla021734,Novel0…
GO:0034212	peptide N-acetyltransferase activity	molecular_function	0.59487	1	2	2218	13	15506	Cla016822,Cla007837
GO:0061733	peptide-lysine-N-acetyltransferase activity	molecular_function	0.59487	1	2	2218	13	15506	Cla007837,Cla016822
GO:0004143	diacylglycerol kinase activity	molecular_function	0.59491	1	1	2218	6	15506	Cla018576
GO:0007205	protein kinase C-activating G-protein coupled receptor signaling pathway	biological_process	0.59491	1	1	2218	6	15506	Cla018576
GO:0061630	ubiquitin protein ligase activity	molecular_function	0.59511	1	7	2218	50	15506	Cla020053,Cla009632,Cla017450,Cla021407,Cla007961,Cla009094,Cla002709
GO:0061659	ubiquitin-like protein ligase activity	molecular_function	0.59511	1	7	2218	50	15506	Cla009094,Cla007961,Cla002709,Cla021407,Cla009632,Cla017450,Cla020053
GO:0031423	hexon binding	molecular_function	0.59703	1	1	2218	6	15506	Cla019188
GO:0022406	membrane docking	biological_process	0.59707	1	5	2218	39	15506	Cla013857,Cla005012,Cla020354,Cla014100,Cla021208
GO:0016877	ligase activity, forming carbon-sulfur bonds	molecular_function	0.59919	1	3	2218	21	15506	Cla013382,Cla021327,Cla002631
GO:0010648	negative regulation of cell communication	biological_process	0.6	1	1	2218	6	15506	Novel01240
GO:0023057	negative regulation of signaling	biological_process	0.6	1	1	2218	6	15506	Novel01240
GO:0008643	carbohydrate transport	biological_process	0.60035	1	7	2218	51	15506	Cla017037,Cla001092,Cla006870,Cla000731,Novel00838,Cla007212,Cla018314
GO:0046058	cAMP metabolic process	biological_process	0.60102	1	1	2218	6	15506	Cla003262
GO:0004435	phosphatidylinositol phospholipase C activity	molecular_function	0.60116	1	1	2218	6	15506	Cla017877
GO:0016071	mRNA metabolic process	biological_process	0.6021	1	23	2218	168	15506	Cla016822,Cla009632,Cla020056,Cla002631,Cla011409,Cla021247,Cla019068,Cla012958,Cla018240,Cla020743,Cla021795,Cla016436,Cla018666,Cla018469,Cla020276,Cla008817,Cla014905,Cla010280,Cla001799,Cla022397,Cla010791,Cla009059,Cla022051
GO:0016740	transferase activity	molecular_function	0.60282	1	408	2218	2973	15506	Cla002060,Cla008341,Cla021684,Cla001947,Cla002691,Cla004901,Cla020517,Cla012631,Cla007969,Cla005958,Cla000798,Cla014460,Cla023275,Cla020689,Cla007689,Cla001518,Cla017808,Cla004874,Cla008376,Cla000974,Cla005807,Cla005583,Cla003471,Cla008415,Cla011828,Cla009782,Novel00652,Cla017149,Cla020337,Cla008781,Cla007424,Cla021134,Cla019837,Cla001092,Cla011749,Cla010678,Cla023286,Cla014786,Cla017212,Cla00515…
GO:0030117	membrane coat	cellular_component	0.60308	1	14	2218	110	15506	Cla018406,Cla008070,Cla012569,Cla008680,Cla016554,Cla006988,Cla009791,Cla021147,Cla018195,Cla004183,Cla019611,Cla011920,Cla022999,Cla013570
GO:0048475	coated membrane	cellular_component	0.60308	1	14	2218	110	15506	Cla021147,Cla018195,Cla022999,Cla013570,Cla019611,Cla004183,Cla011920,Cla012569,Cla008070,Cla018406,Cla009791,Cla016554,Cla008680,Cla006988
GO:0006904	vesicle docking involved in exocytosis	biological_process	0.60314	1	4	2218	31	15506	Cla013857,Cla005012,Cla020354,Cla014100
GO:0044262	cellular carbohydrate metabolic process	biological_process	0.60323	1	21	2218	159	15506	Cla018547,Cla009948,Cla017383,Cla002601,Cla016671,Cla011369,Cla011371,Cla011131,Novel01098,Cla008123,Cla008465,Cla012972,Cla012973,Cla018918,Cla023286,Cla005675,Cla012748,Cla017384,Cla007500,Cla003320,Cla004473
GO:0044764	multi-organism cellular process	biological_process	0.6033	1	43	2218	314	15506	Cla008720,Cla018314,Cla019571,Cla016176,Cla009282,Cla016661,Cla006353,Cla018866,Cla012284,Cla019919,Cla007501,Cla020286,Cla010580,Cla003325,Cla004278,Cla016088,Cla012513,Cla000543,Cla010405,Cla003535,Cla019444,Cla021997,Cla010650,Cla021734,Cla014632,Cla017661,Cla017615,Cla018885,Cla008692,Cla010875,Cla009630,Cla016736,Cla004685,Cla017808,Cla002350,Cla004918,Cla020053,Cla009604,Cla020455,Cla005201…
GO:0008234	cysteine-type peptidase activity	molecular_function	0.60415	1	14	2218	101	15506	Cla004245,Novel00586,Cla011553,Cla005612,Cla015597,Novel00266,Cla004657,Cla012972,Cla022806,Cla016594,Cla018253,Novel01117,Cla010439,Cla004470
GO:0051205	protein insertion into membrane	biological_process	0.60426	1	2	2218	14	15506	Cla022724,Cla017560
GO:0009372	quorum sensing	biological_process	0.60457	1	1	2218	6	15506	Novel00448
GO:0048872	homeostasis of number of cells	biological_process	0.60457	1	1	2218	6	15506	Novel00448
GO:0048874	homeostasis of number of cells in a free-living population	biological_process	0.60457	1	1	2218	6	15506	Novel00448
GO:0032507	maintenance of protein location in cell	biological_process	0.60513	1	2	2218	14	15506	Cla010537,Novel01030
GO:0045185	maintenance of protein location	biological_process	0.60513	1	2	2218	14	15506	Cla010537,Novel01030
GO:0051651	maintenance of location in cell	biological_process	0.60513	1	2	2218	14	15506	Novel01030,Cla010537
GO:0008176	tRNA (guanine-N7-)-methyltransferase activity	molecular_function	0.60529	1	3	2218	21	15506	Cla010098,Cla022230,Cla004901
GO:0044413	avoidance of host defenses	biological_process	0.60601	1	2	2218	14	15506	Cla004918,Cla019444
GO:0044415	evasion or tolerance of host defenses	biological_process	0.60601	1	2	2218	14	15506	Cla004918,Cla019444
GO:0051832	avoidance of defenses of other organism involved in symbiotic interaction	biological_process	0.60601	1	2	2218	14	15506	Cla004918,Cla019444
GO:0051834	evasion or tolerance of defenses of other organism involved in symbiotic interaction	biological_process	0.60601	1	2	2218	14	15506	Cla019444,Cla004918
GO:0052173	response to defenses of other organism involved in symbiotic interaction	biological_process	0.60601	1	2	2218	14	15506	Cla004918,Cla019444
GO:0052200	response to host defenses	biological_process	0.60601	1	2	2218	14	15506	Cla004918,Cla019444
GO:0075136	response to host	biological_process	0.60601	1	2	2218	14	15506	Cla004918,Cla019444
GO:0005215	transporter activity	molecular_function	0.60604	1	163	2218	1185	15506	Cla011094,Cla020249,Cla019797,Cla001020,Cla021250,Cla019977,Cla008218,Cla022678,Cla019297,Cla020293,Cla014452,Cla005130,Cla019134,Cla004949,Cla012411,Cla018287,Cla019834,Cla007674,Cla006162,Cla014122,Cla015527,Cla009747,Cla009108,Cla011218,Cla008210,Cla016120,Novel01194,Cla019612,Cla010147,Novel00965,Cla017215,Cla019444,Cla018195,Cla012011,Cla003774,Cla003221,Cla003644,Cla017037,Cla020816,Cla0179…
GO:0019028	viral capsid	cellular_component	0.60642	1	26	2218	188	15506	Cla003218,Cla011833,Cla012547,Cla022333,Cla017290,Novel00891,Cla021336,Cla015281,Cla018891,Cla010790,Cla010875,Cla009478,Cla008341,Cla005058,Cla006400,Cla011151,Cla000396,Cla003628,Cla008555,Cla020875,Cla003424,Cla022468,Cla021734,Cla014746,Cla015380,Cla007641
GO:0010562	positive regulation of phosphorus metabolic process	biological_process	0.60663	1	1	2218	6	15506	Cla011936
[truncated: 989 more rows]

## Sheet: subcluster2 GO
GO_accession	Description	Term_type	Over_represented_pValue	Corrected_pValue	DEG_item	DEG_list	Bg_item	Bg_list	Gene_names
GO:0006412	translation	biological_process	2.5797e-15	8.497e-12	318	6402	577	15506	Cla014427,Cla002859,Cla022927,Novel00042,Cla018238,Cla013452,Cla009257,Cla020060,Cla021421,Cla018907,Cla007805,Cla009097,Cla011090,Cla000851,Cla011819,Cla002953,Cla020584,Cla018728,Cla019697,Cla005631,Cla019393,Cla009356,Cla006156,Cla001512,Cla020393,Cla010575,Cla022472,Cla005437,Cla009803,Cla019877,Cla017591,Cla022340,Cla002792,Cla020108,Cla020714,Cla014425,Cla010855,Cla014276,Cla003782,Cla00616…
GO:0043043	peptide biosynthetic process	biological_process	4.3942e-15	8.497e-12	324	6402	590	15506	Cla022462,Cla018708,Cla019826,Cla004124,Cla013082,Cla015735,Cla013129,Cla006914,Cla007371,Cla007827,Cla007074,Cla007215,Cla016113,Cla017464,Cla011939,Cla023360,Cla017307,Cla008040,Cla023056,Cla017456,Cla020201,Cla007207,Novel00789,Cla018223,Cla021884,Cla010986,Cla012641,Cla012352,Cla002740,Cla022757,Cla005467,Cla016580,Cla014500,Cla011203,Cla021511,Cla005164,Cla021599,Cla003177,Cla009786,Cla01056…
GO:0006518	peptide metabolic process	biological_process	7.3001e-15	8.497e-12	331	6402	607	15506	Cla015735,Cla007371,Cla013129,Cla006914,Cla022462,Cla018708,Cla019826,Cla004124,Cla013082,Cla008040,Cla023056,Cla017456,Cla016113,Cla007827,Cla007074,Cla007215,Cla011939,Cla017307,Cla023360,Cla017464,Novel00789,Cla018223,Cla014738,Cla007207,Cla020201,Cla008257,Cla014500,Cla005164,Cla021511,Cla011203,Cla012352,Cla012641,Cla010986,Cla021884,Cla005467,Cla016580,Cla022757,Cla002740,Cla021349,Cla01960…
GO:0043604	amide biosynthetic process	biological_process	8.5748e-15	8.497e-12	341	6402	627	15506	Cla016580,Cla005467,Cla002740,Cla022757,Cla010986,Cla012352,Cla012641,Cla021884,Cla021511,Cla005164,Cla011203,Cla014500,Cla007207,Cla020201,Cla018223,Cla012152,Novel00789,Cla017307,Cla023360,Cla011939,Cla017464,Cla006141,Cla016113,Cla007074,Cla007215,Cla007827,Cla017456,Cla017924,Cla023056,Cla008040,Cla013082,Cla004124,Cla018708,Cla022462,Cla019826,Cla007371,Cla013129,Cla006914,Cla015735,Cla01101…
GO:0030529	ribonucleoprotein complex	cellular_component	9.5301e-15	8.497e-12	255	6402	468	15506	Novel00042,Cla013452,Cla021565,Cla002859,Cla022038,Cla022927,Cla012746,Cla009169,Cla011090,Cla009257,Cla021421,Cla018907,Cla004706,Cla008636,Cla020584,Cla002953,Cla020929,Cla019697,Cla022801,Cla016760,Cla002589,Cla010575,Cla022472,Cla009228,Cla005437,Cla011775,Cla018503,Cla022372,Cla018989,Cla002792,Cla020108,Cla014330,Cla003639,Cla020183,Cla009803,Cla010729,Cla004723,Cla022340,Cla014425,Cla01573…
GO:0005840	ribosome	cellular_component	4.3002e-14	2.7593e-11	192	6402	347	15506	Cla002792,Cla020108,Cla003639,Cla009803,Cla010729,Cla004723,Cla022340,Cla014425,Cla015738,Cla003319,Novel01203,Cla016419,Cla003782,Cla006168,Cla001103,Cla010270,Cla009927,Cla021996,Novel01110,Novel00747,Novel00042,Cla021565,Cla013452,Cla002859,Cla022927,Cla011090,Cla009169,Cla009257,Cla021421,Cla018907,Cla004706,Cla002953,Cla020584,Cla019697,Cla020929,Cla016760,Cla002589,Cla022472,Cla009228,Cla01…
GO:0043603	cellular amide metabolic process	biological_process	4.3326e-14	2.7593e-11	352	6402	656	15506	Cla015200,Cla016820,Cla006868,Cla006858,Cla006316,Cla017842,Cla015267,Cla002777,Cla007614,Cla009086,Cla006726,Cla023259,Cla004014,Cla020254,Cla011196,Cla008094,Cla014033,Cla021829,Cla008712,Cla015443,Cla005361,Cla018500,Cla019898,Cla016706,Cla013684,Cla013346,Cla015306,Cla002339,Cla007089,Cla012286,Cla017388,Cla020667,Cla006462,Cla022946,Cla012514,Cla008445,Cla015400,Cla012100,Cla002613,Cla002420…
GO:0003735	structural constituent of ribosome	molecular_function	2.8422e-13	1.5838e-10	188	6402	345	15506	Cla012352,Cla021884,Cla016580,Cla010206,Cla017820,Cla008228,Cla002740,Cla018966,Cla014500,Cla017656,Cla021511,Cla016020,Novel01092,Cla003155,Cla011359,Cla014756,Cla020201,Cla008282,Cla011243,Novel00789,Cla022106,Cla014737,Cla019619,Cla006965,Cla018223,Cla002687,Cla016113,Cla014218,Cla007215,Cla007827,Novel00880,Cla023360,Cla017307,Cla017464,Novel00932,Cla023056,Cla009306,Cla009258,Cla007796,Cla01…
GO:0043232	intracellular non-membrane-bounded organelle	cellular_component	9.167e-10	4.1259e-07	367	6402	760	15506	Cla009169,Cla004706,Novel00611,Cla021565,Cla007547,Cla003358,Cla019502,Cla010442,Cla008120,Cla009228,Cla004634,Cla014286,Cla022613,Cla018989,Cla011775,Cla020929,Cla021871,Cla002589,Cla020684,Cla001874,Cla009767,Cla016760,Cla005052,Cla015738,Novel01203,Cla000310,Cla003319,Cla006322,Cla018422,Cla003639,Cla004723,Cla010729,Cla001685,Cla021401,Cla009264,Cla021996,Cla013360,Cla009927,Cla010270,Cla0080…
GO:0043229	intracellular organelle	cellular_component	9.2551e-10	4.1259e-07	1156	6402	2562	15506	Cla022359,Cla003617,Cla020961,Cla014944,Cla005489,Cla002344,Cla012997,Cla006373,Cla011694,Novel00553,Cla023007,Cla011851,Cla016933,Cla009150,Cla015474,Cla007007,Cla003121,Cla018461,Cla022118,Cla013340,Cla010197,Novel00231,Cla017831,Cla004111,Cla000832,Cla009606,Cla014503,Cla005982,Cla004854,Cla003028,Cla014218,Cla020282,Cla006977,Cla014502,Cla001713,Cla009258,Cla016675,Cla015366,Cla020218,Cla0142…
GO:0043228	non-membrane-bounded organelle	cellular_component	3.8414e-09	1.5568e-06	374	6402	782	15506	Cla015214,Cla017820,Cla012595,Cla010206,Cla003176,Cla015294,Cla017680,Cla018966,Cla003155,Novel01092,Cla016020,Cla017656,Cla019020,Cla011359,Cla014756,Cla011243,Cla008282,Cla006965,Cla014737,Cla019619,Cla013750,Cla001484,Cla022106,Cla002687,Novel00251,Cla009400,Cla009978,Cla014218,Novel00932,Novel00880,Cla009258,Cla007796,Cla009306,Cla016675,Cla019629,Cla009969,Cla013508,Cla008003,Cla007599,Cla00…
GO:0005515	protein binding	molecular_function	4.4765e-09	1.663e-06	1720	6402	3655	15506	Cla009904,Cla015790,Cla015785,Cla020344,Cla007874,Cla016872,Cla015691,Cla016284,Cla005983,Cla021263,Cla015458,Cla018696,Cla013211,Cla019828,Cla021085,Cla017431,Cla023288,Cla018050,Cla014747,Cla017283,Cla015055,Cla001337,Cla011733,Cla003270,Cla017108,Cla010365,Cla014814,Cla008576,Cla005426,Cla013503,Cla003571,Cla004169,Cla008969,Cla021382,Cla004352,Cla016023,Cla022064,Cla001488,Cla019903,Cla003281…
GO:0043226	organelle	cellular_component	5.7678e-09	1.9779e-06	1166	6402	2602	15506	Cla016247,Cla023330,Cla014798,Cla017834,Cla010291,Cla017939,Cla004360,Cla017002,Cla013711,Cla006014,Cla013550,Cla011845,Cla012193,Cla004827,Cla016712,Cla004937,Cla004695,Cla014440,Cla021023,Cla021646,Cla015161,Cla001990,Cla010689,Cla013245,Cla005149,Cla015896,Cla012225,Cla017565,Cla017552,Cla019948,Cla003175,Cla008741,Cla013672,Cla018114,Cla005254,Cla002364,Cla013240,Cla014310,Cla012667,Cla012381…
GO:0005622	intracellular	cellular_component	8.5127e-09	2.7107e-06	1456	6402	3288	15506	Cla018731,Cla012900,Cla012623,Cla006453,Cla008839,Cla008624,Cla020131,Cla022510,Cla008345,Cla016824,Cla015923,Cla009003,Cla019986,Cla016393,Cla021529,Cla000843,Cla008774,Cla004255,Cla020299,Cla003957,Cla016598,Novel00530,Cla010827,Cla021220,Novel00962,Cla011973,Cla023171,Cla008045,Cla002486,Cla012686,Cla018522,Cla015834,Cla019001,Cla020234,Cla008504,Cla012118,Cla021229,Cla006040,Cla018123,Cla0112…
GO:0044424	intracellular part	cellular_component	1.0311e-08	3.0645e-06	1415	6402	3190	15506	Cla021485,Cla002393,Cla010782,Cla016170,Cla015294,Cla010341,Novel01092,Cla014369,Cla001785,Cla008572,Cla013793,Cla019619,Cla006876,Cla002273,Cla008169,Cla013464,Cla021105,Cla002172,Cla003236,Cla011673,Cla019973,Cla006012,Cla008820,Cla004629,Cla013508,Cla017165,Cla007599,Cla014126,Cla007456,Cla016588,Cla010014,Cla004931,Cla021869,Cla013221,Cla005043,Cla009355,Cla007243,Cla022861,Cla018933,Cla02348…
GO:0044267	cellular protein metabolic process	biological_process	1.402e-08	3.9062e-06	977	6402	2025	15506	Cla005631,Cla022163,Cla009356,Cla006156,Cla020393,Cla001512,Cla009793,Cla022198,Cla000851,Cla013654,Cla010886,Cla010910,Cla006822,Cla002953,Cla018728,Cla014351,Cla023466,Cla019697,Cla012172,Cla009209,Cla020060,Cla008968,Cla018907,Cla008521,Cla018484,Cla016389,Cla007211,Cla014427,Cla021489,Cla013312,Cla002859,Cla005313,Cla008660,Cla013717,Cla022002,Novel01110,Cla019085,Cla017947,Cla015619,Cla00920…
GO:1901566	organonitrogen compound biosynthetic process	biological_process	1.9553e-08	5.1274e-06	513	6402	1069	15506	Cla009927,Cla005084,Cla010270,Cla021996,Cla011423,Cla009061,Novel00812,Cla001285,Cla001103,Cla014362,Cla003319,Cla020340,Novel01203,Cla018237,Cla009547,Cla003639,Cla020183,Cla019516,Cla004723,Cla020621,Cla011775,Cla014865,Cla009169,Cla010841,Cla020436,Cla003124,Cla019502,Cla021565,Cla015123,Cla011255,Cla021467,Cla022444,Cla002420,Cla002613,Cla012100,Cla022581,Cla015400,Cla022946,Cla017388,Cla0122…
GO:0003723	RNA binding	molecular_function	2.2485e-08	5.5687e-06	332	6402	628	15506	Cla011008,Cla023123,Cla007614,Cla005099,Cla007610,Cla008559,Cla016492,Cla008395,Cla001882,Cla002915,Cla008261,Cla004627,Cla008094,Cla008349,Cla012453,Cla020548,Cla013662,Cla006462,Cla004710,Cla008938,Novel00970,Cla014011,Cla022444,Cla015562,Cla008713,Cla009177,Cla007413,Cla008777,Cla002613,Cla008641,Cla007322,Cla002330,Cla012746,Cla016854,Cla013166,Cla002327,Cla021060,Cla011814,Cla009228,Cla00187…
GO:0005488	binding	molecular_function	2.9447e-08	6.9092e-06	3892	6402	8832	15506	Cla005934,Cla016289,Cla004787,Cla004958,Cla021227,Cla007362,Cla014351,Cla011541,Cla010886,Cla007463,Cla010214,Cla005631,Cla022372,Cla009895,Cla007051,Cla013048,Cla008135,Cla001619,Cla006156,Cla009178,Cla007134,Cla015907,Cla010216,Cla005313,Novel01126,Cla017869,Cla020329,Cla006055,Cla008281,Cla016368,Cla011171,Cla012431,Cla009320,Cla018024,Cla008968,Cla017505,Cla007211,Cla016721,Cla019292,Cla00512…
a018959,Cla008319,Cla016848,Cla015297,Cla006135,Cla022206,Cla014818,Cla022083,Cla008098,Cla004844,Cla016472,Cla000687,Cla015177,Cla023022,Cla016843,Cla014806,Cla006711,Cla013031,Cla004363,Cla012774,Cla013332,Cla011217,Cla022675,Cla004006,Cla016138,Cla020026,Cla022074,Cla012778,Cla010234,Cla006251,Cla011359,Novel00919,Cla012537,Cla010349,Cla018910,Cla011614,Cla012556,Novel00798,Cla014204,Cla017697…
GO:0005198	structural molecule activity	molecular_function	4.1589e-08	9.2701e-06	279	6402	570	15506	Cla019668,Cla009786,Cla011159,Cla021599,Cla002106,Cla003113,Cla017580,Cla019608,Cla015819,Cla006096,Cla022853,Cla018289,Cla004827,Cla016819,Cla019173,Cla014089,Cla021178,Cla006506,Cla021388,Cla015896,Cla010133,Cla010689,Cla020067,Cla014440,Cla004937,Cla009625,Cla011327,Cla014030,Novel00343,Cla008741,Cla018114,Cla018067,Cla022601,Cla021510,Cla021773,Cla010732,Cla017565,Cla017717,Cla004124,Cla01308…
GO:0032991	macromolecular complex	cellular_component	1.0773e-07	2.287e-05	843	6402	1865	15506	Cla015280,Cla009786,Cla022156,Cla003366,Cla012075,Cla011898,Cla008510,Cla002106,Cla019608,Cla015819,Cla017580,Cla003591,Cla006096,Cla018289,Cla013923,Cla022454,Cla009076,Novel00400,Cla019173,Cla009461,Cla019950,Cla021178,Cla006506,Cla015073,Cla002272,Cla021388,Cla022466,Cla007755,Cla011327,Cla004767,Cla007338,Cla014562,Novel00343,Cla014030,Cla016295,Cla022511,Cla017984,Cla011816,Cla021924,Cla0031…
GO:0004842	ubiquitin-protein transferase activity	molecular_function	3.0091e-07	5.8324e-05	163	6402	294	15506	Cla014959,Cla005625,Cla000970,Cla013320,Cla018884,Cla012054,Cla020328,Cla004785,Cla022520,Cla001059,Cla018536,Cla010390,Cla022695,Cla021528,Cla017623,Cla010325,Cla015548,Cla014841,Cla013514,Cla014081,Cla022589,Cla009225,Cla019656,Cla006536,Cla003913,Cla016275,Cla014585,Cla003014,Cla015907,Cla023391,Cla014288,Cla021489,Cla023453,Cla013549,Cla004583,Cla015285,Cla010191,Cla021226,Cla016082,Cla018690…
GO:0019787	ubiquitin-like protein transferase activity	molecular_function	3.0091e-07	5.8324e-05	163	6402	294	15506	Cla023350,Cla012118,Cla008504,Cla019187,Cla005956,Cla013550,Cla002697,Cla006635,Novel00823,Cla010291,Cla005177,Cla012075,Cla007104,Cla008510,Cla002696,Cla019093,Cla016933,Cla008309,Cla017984,Cla021201,Cla019798,Cla022861,Cla022118,Cla016973,Cla013298,Cla007297,Cla022120,Cla008921,Cla008581,Cla017845,Cla003121,Cla021969,Cla003431,Cla017552,Cla017746,Cla004111,Cla003957,Cla010197,Cla007338,Cla00332…
GO:0034641	cellular nitrogen compound metabolic process	biological_process	4.5695e-06	0.00084878	1664	6402	3773	15506	Cla023385,Cla003936,Cla002978,Cla004496,Cla013724,Cla021798,Cla023480,Cla021395,Cla006142,Cla003271,Cla021797,Cla012782,Cla011286,Cla002800,Cla014953,Cla018321,Cla013751,Cla022373,Cla007596,Cla020817,Cla023307,Cla021531,Cla014241,Cla018585,Cla010190,Cla014576,Cla021237,Cla023351,Cla022194,Cla018661,Cla013133,Cla022976,Cla013501,Cla005783,Cla022056,Cla005103,Cla008767,Cla002751,Cla004259,Cla002373…
GO:0044260	cellular macromolecule metabolic process	biological_process	8.8514e-06	0.0015302	2051	6402	4594	15506	Cla007827,Cla008077,Cla004776,Cla017456,Cla006119,Cla002731,Cla014534,Cla023056,Cla011835,Cla008040,Novel01115,Cla001783,Cla018549,Cla007070,Cla021725,Cla019836,Novel00111,Cla021294,Cla006537,Cla013218,Cla008640,Cla015186,Cla021189,Cla013830,Cla002740,Cla020388,Cla020710,Novel00924,Cla009748,Cla016209,Cla013421,Cla007420,Cla002434,Cla012917,Cla007839,Cla011119,Cla000464,Cla021521,Cla020473,Cla001…
GO:1901564	organonitrogen compound metabolic process	biological_process	8.9247e-06	0.0015302	657	6402	1431	15506	Cla001331,Cla016346,Cla021510,Cla005762,Cla022409,Cla021773,Cla017565,Cla008741,Cla013014,Cla011015,Cla018067,Cla010053,Cla009877,Cla014440,Cla022554,Cla004937,Cla011443,Cla009625,Cla011197,Cla010689,Cla014881,Cla013673,Cla018071,Cla023287,Cla014340,Cla019624,Cla010593,Cla014089,Cla014579,Cla023387,Cla019212,Cla011865,Cla004827,Cla016819,Cla012934,Cla002948,Cla017365,Cla015852,Cla005443,Cla010802…
GO:0005623	cell	cellular_component	1.195e-05	0.0019026	1561	6402	3596	15506	Cla009447,Cla008521,Cla005479,Cla022580,Cla007790,Cla004664,Cla013267,Cla014196,Cla018503,Cla016096,Cla006303,Cla001512,Cla021013,Cla004655,Cla019697,Cla018728,Cla002953,Cla021955,Cla011169,Cla013481,Cla011844,Cla014425,Cla006556,Cla018536,Cla014794,Cla016596,Cla010882,Cla016764,Cla014330,Cla003722,Cla020101,Novel01110,Cla013808,Cla015619,Cla003782,Cla020981,Cla005886,Cla001801,Cla008535,Cla01953…
GO:0044464	cell part	cellular_component	1.195e-05	0.0019026	1561	6402	3596	15506	Cla006725,Cla013921,Cla007886,Cla015785,Cla016913,Cla013713,Cla010194,Cla021119,Cla016872,Cla006307,Cla007874,Cla020015,Cla008535,Cla019536,Cla010725,Cla005364,Cla019051,Cla016284,Cla015458,Cla013798,Cla005983,Cla020509,Cla005802,Cla017621,Cla004480,Cla015531,Cla001768,Cla017431,Cla003004,Cla006633,Cla022796,Cla015627,Cla018267,Cla008576,Cla004169,Cla017960,Cla006190,Cla016023,Cla014776,Cla022064…
GO:0008104	protein localization	biological_process	1.2732e-05	0.0019274	335	6402	656	15506	Cla021907,Cla005067,Cla017292,Cla004169,Cla022413,Cla002644,Cla005568,Cla001389,Novel01032,Cla022251,Cla022869,Cla022811,Cla015953,Cla020379,Cla023303,Cla020480,Cla001517,Cla009331,Cla005843,Cla008943,Cla001719,Cla022064,Cla015931,Cla018021,Cla023186,Cla020015,Cla016562,Cla007874,Cla006307,Cla020344,Cla009993,Cla020323,Cla017431,Novel00545,Cla009307,Cla013423,Cla005150,Cla012755,Cla006972,Cla0164…
GO:0003676	nucleic acid binding	molecular_function	1.297e-05	0.0019274	1198	6402	2634	15506	Cla008297,Cla004292,Cla022674,Cla001269,Cla009725,Cla017536,Cla015219,Cla015002,Cla005505,Cla014910,Cla001845,Cla009042,Cla020958,Cla020972,Cla014787,Cla021884,Cla012050,Cla010278,Cla021244,Cla014844,Cla021095,Cla000273,Cla007730,Cla007279,Cla006839,Cla017111,Cla016351,Cla006176,Cla009373,Cla011917,Cla008566,Cla021844,Cla019145,Cla008236,Cla001807,Cla019671,Cla013490,Cla023144,Cla014089,Cla021279…
GO:0045184	establishment of protein localization	biological_process	1.4868e-05	0.0021381	325	6402	635	15506	Novel01341,Cla021188,Cla019980,Cla017033,Cla009086,Cla009882,Cla018103,Cla006982,Cla002893,Cla000383,Cla000052,Cla003992,Cla016526,Cla014795,Cla010963,Novel00297,Cla008145,Cla011836,Cla020960,Cla020885,Cla009322,Cla009268,Cla013662,Cla004006,Cla011430,Cla014806,Cla013195,Cla021713,Cla005372,Cla022787,Cla019307,Cla006716,Cla007413,Cla015562,Cla003131,Cla006013,Cla001501,Novel00628,Cla005128,Cla001…
GO:0015031	protein transport	biological_process	1.7867e-05	0.0024891	319	6402	623	15506	Cla003653,Cla006598,Cla010048,Cla014054,Cla022357,Novel01143,Cla010102,Cla000323,Cla018124,Cla008040,Cla019151,Cla012667,Cla021111,Cla012509,Cla019836,Cla010358,Cla004885,Cla009916,Cla012678,Cla020013,Cla017626,Cla014994,Cla001391,Cla010361,Cla007922,Cla013928,Cla021483,Cla021476,Cla011782,Cla003440,Cla009277,Novel00232,Cla022745,Cla007207,Cla022683,Cla019561,Cla002703,Cla013940,Cla016987,Cla0218…
GO:0005737	cytoplasm	cellular_component	2.1143e-05	0.0028562	661	6402	1470	15506	Cla004124,Cla013082,Cla012381,Cla010074,Cla012509,Cla012667,Cla018708,Cla019826,Cla008136,Cla013240,Cla017626,Cla013129,Cla015017,Cla016614,Cla020369,Cla012678,Cla017029,Cla018232,Cla019192,Cla010048,Cla012976,Cla021132,Cla006598,Cla011895,Cla017397,Novel01143,Cla021933,Cla022935,Cla022683,Cla008257,Cla017047,Cla020201,Cla022745,Cla014738,Cla008566,Cla019960,Cla006937,Cla015277,Cla018223,Novel007…
GO:0006807	nitrogen compound metabolic process	biological_process	2.1967e-05	0.0028803	1764	6402	4023	15506	Cla000386,Cla017593,Cla006194,Cla007532,Cla012697,Cla013251,Cla002208,Cla014276,Cla006168,Cla014444,Cla013005,Cla014839,Cla013416,Cla001196,Cla011411,Cla002614,Cla004620,Cla020108,Cla014998,Cla009803,Cla019248,Cla021831,Cla019877,Cla008889,Cla011991,Cla004097,Cla014963,Cla018318,Cla008636,Cla005117,Cla010918,Cla020584,Cla021667,Cla023208,Cla021832,Cla009853,Cla005437,Cla019393,Cla019554,Cla020874…
[truncated: 3,874 more rows]

## Sheet: subcluster3 GO
GO_accession	Description	Term_type	Over_represented_pValue	Corrected_pValue	DEG_item	DEG_list	Bg_item	Bg_list	Gene_names
[truncated: 1,713 more rows]

## Sheet: subcluster4 GO
GO_accession	Description	Term_type	Over_represented_pValue	Corrected_pValue	DEG_item	DEG_list	Bg_item	Bg_list	Gene_names
[truncated: 2,515 more rows]

[truncated: 8 more sheets: subcluster5 GO, subcluster6 GO, subcluster1 KEGG, subcluster2 KEGG, subcluster3 KEGG, subcluster4 KEGG, subcluster5 KEGG, subcluster6 KEGG]
