# Supplementary material for: Transcriptome regulation of carotenoids in five flesh-colored watermelon (Citrullus lanatus)
Source: Research Square preprint supplement (doi:10.21203/rs.3.rs-42816/v2), 2021-01-12
Supplement: Supplementary file 3 [file f71c0a3659f4c9ad4f0e7bfa.xlsx]

## Sheet: O_20vsP_20.DEG
Gene_id	readcount_O_2	readcount_P_2	log2FoldChange	pval	padj	up_down	Blast swiss prot
Cla000027	580.391	337.44	0.7824	0.0023961	0.02294	up	sp|Q9LTR2|TGD2_ARATH Protein TRIGALACTOSYLDIACYLGLYCEROL 2, chloroplastic OS=Arabidopsis thaliana GN=TGD2 PE=2 SV=1//2.21264e-63
Cla000129	3270.44	1219.3	1.4234	4.5755e-11	2.8016e-09	up	sp|Q6NPF9|TRXY1_ARATH Thioredoxin Y1, chloroplastic OS=Arabidopsis thaliana GN=At1g76760 PE=2 SV=1//3.86818e-50
Cla000152	10469.5	508.286	4.3644	9.5387e-35	6.9438e-32	up	sp|Q949Q5|PSAO_ARATH Photosystem I subunit O OS=Arabidopsis thaliana GN=PSAO PE=1 SV=1//6.21964e-44
Cla000266	1711.3	789.41	1.1162	6.7076e-07	1.959e-05	up	sp|Q5XET4|PP142_ARATH Pentatricopeptide repeat-containing protein At2g01860 OS=Arabidopsis thaliana GN=EMB975 PE=2 SV=1//4.18303e-154
Cla000304	5207.09	1819.5	1.5169	1.7305e-13	1.5252e-11	up	sp|Q689G6|PRR95_ORYSJ Two-component response regulator-like PRR95 OS=Oryza sativa subsp. japonica GN=PRR95 PE=2 SV=1//3.73561e-96
Cla000310	681.567	257.349	1.4051	4.5664e-05	0.00083413	up	-//-
Cla000311	12883.6	4365.44	1.5613	4.8725e-14	4.5604e-12	up	-//-
Cla000312	1364.68	619.255	1.14	9.8659e-07	2.7742e-05	up	sp|Q94JX9|NACA2_ARATH Nascent polypeptide-associated complex subunit alpha-like protein 2 OS=Arabidopsis thaliana GN=At3g49470 PE=2 SV=2//6.8208e-37
Cla000331	1183.55	766.445	0.62686	0.003864	0.033099	up	sp|Q5ZHP7|EAF2_CHICK ELL-associated factor 2 OS=Gallus gallus GN=EAF2 PE=2 SV=1//3.48652e-07
Cla000333	134.298	43.674	1.6206	0.00016608	0.0025404	up	sp|Q94CD1|HHT1_ARATH Omega-hydroxypalmitate O-feruloyl transferase OS=Arabidopsis thaliana GN=HHT1 PE=1 SV=1//1.0735e-60
Cla000391	308.616	132.57	1.2191	0.00053543	0.0067009	up	sp|Q9ZQ89|UPS2_ARATH Ureide permease 2 OS=Arabidopsis thaliana GN=UPS2 PE=1 SV=2//1.2331e-177
Cla000465	1563.59	418.964	1.9	5.5212e-16	7.2832e-14	up	sp|Q02764|RK24_TOBAC 50S ribosomal protein L24, chloroplastic OS=Nicotiana tabacum GN=RPL24 PE=1 SV=1//3.50946e-83
Cla000490	3690.63	1233.99	1.5805	5.9691e-06	0.00014186	up	-//-
Cla000513	1652.44	719.934	1.1987	1.0541e-07	3.641e-06	up	sp|P22686|CB2_CHLMO Chlorophyll a-b binding protein of LHCII type I, chloroplastic OS=Chlamydomonas moewusii PE=2 SV=1//5.5702e-61
Cla000526	3140.61	1910.65	0.71698	0.00049245	0.0062811	up	sp|O14155|YE72_SCHPO UPF0047 protein C4A8.02c OS=Schizosaccharomyces pombe (strain 972 / ATCC 24843) GN=SPAC4A8.02c PE=3 SV=1//1.32172e-35
Cla000655	1393.61	663.96	1.0697	3.761e-06	9.417e-05	up	sp|Q93VK5|LUT5_ARATH Protein LUTEIN DEFICIENT 5, chloroplastic OS=Arabidopsis thaliana GN=CYP97A3 PE=1 SV=1//0
Cla000745	4989.79	2940.73	0.76281	0.0047231	0.038456	up	sp|Q05091|PGIP_PYRCO Polygalacturonase inhibitor OS=Pyrus communis GN=PGIP PE=1 SV=1//3.75264e-156
Cla000803	554.174	64.8922	3.0942	4.6244e-25	1.8179e-22	up	sp|Q9CA56|PP121_ARATH Pentatricopeptide repeat-containing protein At1g74600, chloroplastic OS=Arabidopsis thaliana GN=PCMP-E69 PE=3 SV=1//2.07268e-12
Cla000814	2087.73	1052.4	0.98825	4.3337e-06	0.00010701	up	sp|Q3ED65|MENG_ARATH 2-phytyl-1,4-beta-naphthoquinone methyltransferase, chloroplastic OS=Arabidopsis thaliana GN=MENG PE=1 SV=2//4.43016e-105
Cla000835	592.737	215.552	1.4594	6.7588e-07	1.971e-05	up	sp|Q9SNB7|PP264_ARATH Pentatricopeptide repeat-containing protein At3g46610 OS=Arabidopsis thaliana GN=At3g46610 PE=2 SV=1//0
Cla000850	1819.67	1041.6	0.80487	0.00019563	0.002913	up	sp|Q9S713|STT7_ARATH Serine/threonine-protein kinase STN7, chloroplastic OS=Arabidopsis thaliana GN=STN7 PE=1 SV=1//0
Cla000855	2606.04	890.48	1.5492	2.3661e-05	0.00047601	up	sp|Q9ZWM9|RAV1_ARATH AP2/ERF and B3 domain-containing transcription factor RAV1 OS=Arabidopsis thaliana GN=RAV1 PE=1 SV=1//8.13786e-123
Cla000871	3240.22	1141.31	1.5054	3.4592e-12	2.556e-10	up	sp|Q6YU51|DXS2_ORYSJ Probable 1-deoxy-D-xylulose-5-phosphate synthase 2, chloroplastic OS=Oryza sativa subsp. japonica GN=Os07g0190000 PE=2 SV=1//0
Cla000874	3408.88	2265.1	0.58972	0.0039205	0.033517	up	sp|Q9LF37|CLPB3_ARATH Chaperone protein ClpB3, chloroplastic OS=Arabidopsis thaliana GN=CLPB3 PE=2 SV=1//0
Cla000885	94.7268	11.6175	3.0275	0.0041239	0.034832	up	sp|Q8W3Z1|BAMS_BETPL Beta-amyrin synthase OS=Betula platyphylla GN=OSCBPY PE=1 SV=1//0
Cla000899	2069.15	1230.08	0.75029	0.00028756	0.0040085	up	sp|Q8S9H7|DIV_ANTMA Transcription factor DIVARICATA OS=Antirrhinum majus GN=DIVARICATA PE=2 SV=1//3.4152e-32
Cla000905	2144.57	1386.35	0.62939	0.0028043	0.025923	up	sp|Q9LIG0|Y3136_ARATH Clavaminate synthase-like protein At3g21360 OS=Arabidopsis thaliana GN=At3g21360 PE=1 SV=1//9.73341e-180
Cla000921	272.343	47.484	2.5199	2.287e-12	1.7289e-10	up	-//-
Cla001007	738.18	257.569	1.519	0.0001533	0.002367	up	sp|Q9SA16|P2A09_ARATH Protein PHLOEM PROTEIN 2-LIKE A9 OS=Arabidopsis thaliana GN=PP2A9 PE=2 SV=1//5.83275e-08
Cla001050	613.233	206.583	1.5697	0.0030166	0.027399	up	-//-
Cla001061	21.1543	1.46455	3.8524	0.0021547	0.021122	up	-//-
Cla001095	3468.02	2072.32	0.74286	0.00040196	0.005313	up	sp|Q9ZQG9|E1314_ARATH Glucan endo-1,3-beta-glucosidase 14 OS=Arabidopsis thaliana GN=At2g27500 PE=1 SV=2//2.30643e-178
Cla001140	261.038	142.89	0.86936	0.0054988	0.043249	up	sp|Q8W4E1|RH47_ARATH DEAD-box ATP-dependent RNA helicase 47, mitochondrial OS=Arabidopsis thaliana GN=RH47 PE=1 SV=2//0
Cla001155	3594.63	569.408	2.6583	2.8024e-33	1.9672e-30	up	sp|Q8GYC7|PGL1B_ARATH PGR5-like protein 1B, chloroplastic OS=Arabidopsis thaliana GN=PGRL1B PE=1 SV=1//1.04089e-157
Cla001160	271.373	134.039	1.0176	0.00049771	0.0063317	up	sp|Q9LDH3|PT112_ARATH Probable sugar phosphate/phosphate translocator At1g12500 OS=Arabidopsis thaliana GN=At1g12500 PE=1 SV=1//4.22649e-176
Cla001167	355.9	201.84	0.81826	0.0030555	0.027688	up	sp|Q9LNA5|ACR8_ARATH ACT domain-containing protein ACR8 OS=Arabidopsis thaliana GN=ACR8 PE=2 SV=1//0
Cla001189	2988.46	1825.14	0.71139	0.0010395	0.011491	up	sp|Q949R4|DIOXL_ARATH Extradiol ring-cleavage dioxygenase OS=Arabidopsis thaliana GN=LIGB PE=2 SV=1//1.92398e-126
Cla001196	3016.99	1777.21	0.76349	0.00016372	0.0025062	up	sp|Q8GX93|CLCE_ARATH Chloride channel protein CLC-e OS=Arabidopsis thaliana GN=CLC-E PE=2 SV=2//0
Cla001219	672.822	369.787	0.86353	0.00063681	0.0076978	up	sp|O80834|AHL9_ARATH AT-hook motif nuclear-localized protein 9 OS=Arabidopsis thaliana GN=AHL9 PE=2 SV=1//4.07658e-77
Cla001222	3042.61	2041.99	0.57533	0.0057989	0.044979	up	sp|Q8GWP5|RIBD_ARATH Riboflavin biosynthesis protein PYRD, chloroplastic OS=Arabidopsis thaliana GN=PYRD PE=1 SV=1//1.86778e-127
Cla001237	594.814	325.486	0.86984	0.00081861	0.0094813	up	-//-
Cla001238	8639.4	4773.91	0.85576	4.5227e-05	0.00082845	up	sp|Q1KLZ2|CAS1_MALDO L-3-cyanoalanine synthase 1, mitochondrial OS=Malus domestica GN=CAS1 PE=1 SV=1//0
Cla001290	411.282	89.7077	2.1968	4.0211e-10	2.0908e-08	up	sp|Q9C899|F6H2_ARATH Feruloyl CoA ortho-hydroxylase 2 OS=Arabidopsis thaliana GN=F6&apos;H2 PE=1 SV=1//3.2741e-58
Cla001317	2339.82	1413.29	0.72734	0.00063494	0.0076821	up	sp|Q9SRY4|LPA1_ARATH Protein LOW PSII ACCUMULATION 1, chloroplastic OS=Arabidopsis thaliana GN=LPA1 PE=1 SV=1//0
Cla001320	45.2494	7.66406	2.5617	0.00080382	0.009332	up	sp|Q8W4G6|CRK15_ARATH Cysteine-rich receptor-like protein kinase 15 OS=Arabidopsis thaliana GN=CRK15 PE=2 SV=2//4.65661e-59
Cla001338	139.227	61.5186	1.1783	0.001596	0.016527	up	sp|Q9M0Y3|ENT3_ARATH Equilibrative nucleotide transporter 3 OS=Arabidopsis thaliana GN=ENT3 PE=1 SV=1//5.40929e-39
Cla001440	4313.64	715.545	2.5918	0.0033651	0.029793	up	sp|Q84WT8|CYT4_ARATH Cysteine proteinase inhibitor 4 OS=Arabidopsis thaliana GN=CYS4 PE=3 SV=2//1.33242e-08
Cla001456	518.348	194.493	1.4142	1.6614e-07	5.5252e-06	up	sp|Q5ZJ08|SYYC_CHICK Tyrosine--tRNA ligase, cytoplasmic OS=Gallus gallus GN=YARS PE=2 SV=1//2.33961e-15
Cla001457	434.987	164.547	1.4025	6.1657e-07	1.8088e-05	up	sp|Q29465|SYYC_BOVIN Tyrosine--tRNA ligase, cytoplasmic OS=Bos taurus GN=YARS PE=2 SV=4//6.67646e-12
Cla001459	893.751	420.706	1.0871	6.459e-06	0.0001524	up	sp|Q9M2Y4|PP276_ARATH Pentatricopeptide repeat-containing protein At3g49740 OS=Arabidopsis thaliana GN=PCMP-E84 PE=2 SV=1//0
Cla001482	5961.42	866.901	2.7817	7.4862e-05	0.0012739	up	sp|Q03200|LIRP1_ORYSJ Light-regulated protein OS=Oryza sativa subsp. japonica GN=LIR1 PE=2 SV=1//1.10715e-26
Cla001502	1896.79	530.117	1.8392	4.8227e-16	6.4047e-14	up	sp|Q9ASS6|PNSL5_ARATH Photosynthetic NDH subunit of lumenal location 5, chloroplastic OS=Arabidopsis thaliana GN=PNSL5 PE=1 SV=1//9.34071e-100
Cla001628	1850.36	300.301	2.6233	9.6325e-06	0.00021687	up	sp|P11670|PRB1_TOBAC Basic form of pathogenesis-related protein 1 OS=Nicotiana tabacum PE=3 SV=1//5.86218e-63
Cla001664	11603.1	7599.81	0.61048	0.0030118	0.027381	up	sp|P48496|TPIC_SPIOL Triosephosphate isomerase, chloroplastic OS=Spinacia oleracea GN=TPIP1 PE=1 SV=1//3.03684e-135
Cla001678	732.525	21.2656	5.1063	2.2044e-31	1.354e-28	up	sp|Q93ZB9|FACR3_ARATH Fatty acyl-CoA reductase 3 OS=Arabidopsis thaliana GN=FAR3 PE=2 SV=1//1.55607e-31
Cla001679	2239.31	131.488	4.0901	5.9163e-12	4.2132e-10	up	sp|Q9XGY7|FAR_SIMCH Alcohol-forming fatty acyl-CoA reductase OS=Simmondsia chinensis PE=1 SV=1//4.11918e-44
Cla001696	277.392	142.572	0.96023	0.00099456	0.011101	up	sp|Q9SGD6|AROD6_ARATH Arogenate dehydratase/prephenate dehydratase 6, chloroplastic OS=Arabidopsis thaliana GN=ADT6 PE=1 SV=1//1.31635e-153
Cla001730	771.448	148.222	2.3798	1.8004e-18	3.4025e-16	up	sp|Q8GWA9|PP157_ARATH Pentatricopeptide repeat-containing protein At2g17033 OS=Arabidopsis thaliana GN=At2g17033 PE=2 SV=1//1.97226e-149
Cla001732	626.64	369.39	0.76249	0.0014506	0.015267	up	sp|Q8LDW9|XTH9_ARATH Xyloglucan endotransglucosylase/hydrolase protein 9 OS=Arabidopsis thaliana GN=XTH9 PE=2 SV=2//6.24408e-156
Cla001745	1107.68	234.97	2.237	1.6401e-05	0.00034634	up	sp|Q9ZR08|Y4230_ARATH G-type lectin S-receptor-like serine/threonine-protein kinase At4g03230 OS=Arabidopsis thaliana GN=At4g03230 PE=3 SV=3//8.98121e-78
Cla001746	717.518	286.163	1.3262	4.7228e-08	1.7319e-06	up	sp|Q9FFR9|CHX18_ARATH Cation/H(+) antiporter 18 OS=Arabidopsis thaliana GN=CHX18 PE=2 SV=1//0
Cla001764	9377.03	539.397	4.1197	1.5263e-53	3.7498e-50	up	sp|P27522|CB13_SOLLC Chlorophyll a-b binding protein 8, chloroplastic OS=Solanum lycopersicum GN=CAB8 PE=3 SV=1//1.78753e-142
Cla001777	18814.6	12172.7	0.6282	0.0041501	0.034994	up	sp|Q54SW1|Y2179_DICDI Putative phosphatidylglycerol/phosphatidylinositol transfer protein DDB_G0282179 OS=Dictyostelium discoideum GN=DDB_G0282179 PE=3 SV=2//3.96262e-07
Cla001787	190.295	72.9601	1.3831	6.8453e-05	0.0011833	up	-//-
Cla001790	30083.9	1785.72	4.0744	1.6449e-28	8.29e-26	up	sp|Q40459|PSBO_TOBAC Oxygen-evolving enhancer protein 1, chloroplastic OS=Nicotiana tabacum GN=PSBO PE=2 SV=1//0
Cla001793	1267.31	798.101	0.66712	0.0021981	0.02142	up	sp|O23166|TR164_ARATH Thioredoxin-like protein HCF164, chloroplastic OS=Arabidopsis thaliana GN=HCF164 PE=2 SV=2//4.80417e-113
Cla001823	3320.42	1764.17	0.91238	8.597e-06	0.0001958	up	sp|Q5RF82|MSTO1_PONPY Protein misato homolog 1 OS=Pongo pygmaeus GN=MSTO1 PE=2 SV=1//6.50799e-48
Cla001856	464.084	68.4089	2.7621	3.0542e-17	4.8806e-15	up	sp|Q6PS57|CKS1_ORYSJ Cyclin-dependent kinases regulatory subunit 1 OS=Oryza sativa subsp. japonica GN=CKS1 PE=2 SV=1//4.63157e-49
Cla001857	4474.16	2494.41	0.84292	5.0771e-05	0.00090801	up	sp|Q9FYC2|PAO_ARATH Pheophorbide a oxygenase, chloroplastic OS=Arabidopsis thaliana GN=PAO PE=1 SV=1//0
Cla001867	8401.75	4962.66	0.75958	0.001248	0.013434	up	-//-
Cla001890	1982.15	1308.64	0.599	0.0056765	0.044187	up	sp|Q8GZ45|SYTC_ARATH Probable threonine--tRNA ligase, cytoplasmic OS=Arabidopsis thaliana GN=At1g17960 PE=2 SV=2//0
Cla001891	9481.74	1510.92	2.6497	1.6901e-07	5.6112e-06	up	sp|A7SWH1|PESC_NEMVE Pescadillo homolog OS=Nematostella vectensis GN=v1g194255 PE=3 SV=1//4.50984e-87
Cla001896	1968.93	1173.64	0.74642	0.00032499	0.004442	up	-//-
Cla001897	7782.58	4468.22	0.80055	5.9743e-05	0.0010494	up	-//-
Cla001898	3259.18	1815.07	0.84448	0.00054517	0.0068077	up	-//-
Cla001915	1028.78	650.903	0.66043	0.0038423	0.032993	up	sp|Q9SY73|PTALR_ARATH NADPH-dependent pterin aldehyde reductase OS=Arabidopsis thaliana GN=At1g10310 PE=1 SV=1//2.48835e-115
Cla001944	737.659	390.915	0.9161	0.0002473	0.0035274	up	sp|Q9ZU32|NADC_ARATH Nicotinate-nucleotide pyrophosphorylase [carboxylating], chloroplastic OS=Arabidopsis thaliana GN=QPT PE=2 SV=2//1.12666e-47
Cla001945	1264.5	592.301	1.0942	2.5045e-06	6.5287e-05	up	sp|Q9ZU32|NADC_ARATH Nicotinate-nucleotide pyrophosphorylase [carboxylating], chloroplastic OS=Arabidopsis thaliana GN=QPT PE=2 SV=2//3.13386e-91
Cla001950	134.905	0.303521	8.7959	1.9576e-24	6.7503e-22	up	sp|Q6NLC8|Y1648_ARATH Uncharacterized protein At1g66480 OS=Arabidopsis thaliana GN=At1g66480 PE=2 SV=1//1.33862e-39
Cla001989	36.8346	4.77914	2.9462	0.00050055	0.0063596	up	-//-
Cla001994	128.316	8.4353	3.9271	9.6834e-07	2.7346e-05	up	sp|Q9SA16|P2A09_ARATH Protein PHLOEM PROTEIN 2-LIKE A9 OS=Arabidopsis thaliana GN=PP2A9 PE=2 SV=1//1.83937e-34
Cla002001	10.9674	0	Inf	0.0063524	0.048466	up	sp|Q9SA16|P2A09_ARATH Protein PHLOEM PROTEIN 2-LIKE A9 OS=Arabidopsis thaliana GN=PP2A9 PE=2 SV=1//1.87111e-34
Cla002012	2328.39	562.769	2.0487	3.2113e-11	2.023e-09	up	-//-
Cla002034	175.942	90.4863	0.95933	0.0039297	0.033567	up	sp|Q9SKX1|IBH1_ARATH Transcription factor IBH1 OS=Arabidopsis thaliana GN=IBH1 PE=1 SV=1//5.04937e-15
Cla002042	1098.35	377.716	1.54	0.00084029	0.0096697	up	sp|P35694|XTH2_SOYBN Xyloglucan endotransglucosylase/hydrolase 2 OS=Glycine max PE=2 SV=1//2.87741e-142
Cla002097	108.576	25.9003	2.0677	1.2356e-05	0.00026894	up	-//-
Cla002166	10114.7	5742.4	0.81673	4.839e-05	0.00087418	up	sp|Q9SGA2|GDPD1_ARATH Glycerophosphodiester phosphodiesterase GDPD1, chloroplastic OS=Arabidopsis thaliana GN=GDPD1 PE=1 SV=1//3.53686e-164
Cla002178	1858.89	905.505	1.0376	4.3271e-06	0.00010698	up	sp|P29450|TRXF_PEA Thioredoxin F-type, chloroplastic OS=Pisum sativum PE=2 SV=1//1.95655e-68
Cla002194	15454.4	8634.18	0.83989	0.00012052	0.0019227	up	sp|Q9C9W9|ADO3_ARATH Adagio protein 3 OS=Arabidopsis thaliana GN=ADO3 PE=1 SV=1//0
Cla002202	1460.04	892.626	0.70988	0.0017734	0.018022	up	sp|Q55512|DHAS_SYNY3 Aspartate-semialdehyde dehydrogenase OS=Synechocystis sp. (strain PCC 6803 / Kazusa) GN=asd PE=3 SV=2//2.48758e-116
Cla002214	940.662	446.718	1.0743	1.1523e-05	0.00025306	up	sp|Q9LQV2|RDR1_ARATH RNA-dependent RNA polymerase 1 OS=Arabidopsis thaliana GN=RDR1 PE=2 SV=1//0
Cla002228	1945.52	646.216	1.5901	4.0313e-13	3.3432e-11	up	sp|O22820|U74F1_ARATH UDP-glycosyltransferase 74F1 OS=Arabidopsis thaliana GN=UGT74F1 PE=1 SV=1//5.98528e-129
Cla002239	9496.38	3508.57	1.4365	2.8589e-12	2.1366e-10	up	sp|O80860|FTSH2_ARATH ATP-dependent zinc metalloprotease FTSH 2, chloroplastic OS=Arabidopsis thaliana GN=FTSH2 PE=1 SV=1//0
Cla002245	2025.69	391.985	2.3695	4.0464e-24	1.348e-21	up	sp|P39101|CAJ1_YEAST Protein CAJ1 OS=Saccharomyces cerevisiae (strain ATCC 204508 / S288c) GN=CAJ1 PE=1 SV=1//3.1503e-13
Cla002250	3111.65	1498.98	1.0537	3.3984e-07	1.0569e-05	up	sp|Q39010|KSG6_ARATH Shaggy-related protein kinase zeta OS=Arabidopsis thaliana GN=ASK6 PE=2 SV=2//0
Cla002277	267.233	140.91	0.92332	0.0015479	0.016158	up	sp|Q6R567|RMA1_CAPAN E3 ubiquitin-protein ligase RMA1H1 OS=Capsicum annuum GN=RMA1H1 PE=1 SV=1//1.38435e-56
Cla002280	432.336	202.606	1.0935	7.3077e-05	0.001249	up	sp|Q9T048|DRL27_ARATH Disease resistance protein At4g27190 OS=Arabidopsis thaliana GN=At4g27190 PE=2 SV=1//1.75976e-51
Cla002287	998.431	434.672	1.1997	8.2293e-07	2.3544e-05	up	-//-
Cla002349	2997.43	1246.65	1.2657	4.9942e-09	2.1574e-07	up	-//-
Cla002353	2047.86	1322.99	0.63032	0.0024973	0.023644	up	sp|Q8LPQ6|AB28B_ARATH ABC transporter B family member 28 OS=Arabidopsis thaliana GN=ABCB28 PE=2 SV=1//0
Cla002354	810.028	409.293	0.98484	3.7851e-05	0.00071603	up	sp|Q1XDS2|YCF20_PYRYE Uncharacterized protein ycf20 OS=Pyropia yezoensis GN=ycf20 PE=3 SV=1//1.76993e-12
Cla002367	1634.62	370.148	2.1428	4.2792e-18	7.6461e-16	up	sp|Q94KL7|SILD_FORIN Secoisolariciresinol dehydrogenase (Fragment) OS=Forsythia intermedia PE=1 SV=1//2.34594e-84
Cla002379	1293.52	505.605	1.3552	1.7779e-09	8.3598e-08	up	sp|F4ICF4|RBL10_ARATH RHOMBOID-like protein 10, chloroplastic OS=Arabidopsis thaliana GN=RBL10 PE=2 SV=1//4.13621e-78
Cla002393	2987.24	1417.49	1.0755	1.936e-07	6.3419e-06	up	sp|O64894|ACOX2_CUCMA Acyl-coenzyme A oxidase, peroxisomal OS=Cucurbita maxima GN=Acx PE=1 SV=1//0
Cla002442	7644.74	4705.87	0.70001	0.00032887	0.0044826	up	sp|P73555|Y875_SYNY3 Uncharacterized membrane protein sll0875 OS=Synechocystis sp. (strain PCC 6803 / Kazusa) GN=sll0875 PE=3 SV=1//7.2643e-46
Cla002517	969.296	545.636	0.829	0.00067272	0.008033	up	sp|O22229|TRXB3_ARATH NADPH-dependent thioredoxin reductase 3 OS=Arabidopsis thaliana GN=NTRC PE=1 SV=2//0
Cla002563	2290.35	1563.6	0.5507	0.0062134	0.047593	up	sp|Q500U8|TKPR1_ARATH Tetraketide alpha-pyrone reductase 1 OS=Arabidopsis thaliana GN=TKPR1 PE=1 SV=1//6.55642e-162
Cla002598	2565.91	1559.96	0.71796	0.0065341	0.049377	up	sp|P26520|G3PC_PETHY Glyceraldehyde-3-phosphate dehydrogenase, cytosolic OS=Petunia hybrida GN=GAPC PE=2 SV=1//0
Cla002600	3660.67	500.825	2.8697	3.3836e-13	2.8421e-11	up	-//-
Cla002601	16356.5	4291.95	1.9302	5.1601e-05	0.00092185	up	sp|P08216|MASY_CUCSA Malate synthase, glyoxysomal OS=Cucumis sativus PE=2 SV=2//0
Cla002624	51.8461	13.6377	1.9266	0.0027305	0.025375	up	sp|Q8IU29|MOCOS_BOMMO Molybdenum cofactor sulfurase OS=Bombyx mori GN=mal PE=2 SV=1//1.61358e-06
Cla002626	797.759	478.548	0.73729	0.0016261	0.016795	up	sp|Q9SW33|TL1Y_ARATH Thylakoid lumenal 17.9 kDa protein, chloroplastic OS=Arabidopsis thaliana GN=At4g24930 PE=1 SV=1//4.55761e-75
Cla002628	131.242	21.1196	2.6356	2.0934e-08	8.1965e-07	up	sp|Q6EU39|MADS6_ORYSJ MADS-box transcription factor 6 OS=Oryza sativa subsp. japonica GN=MADS6 PE=1 SV=1//9.29018e-47
Cla002630	102.598	2.88355	5.153	9.4894e-15	1.0082e-12	up	sp|P0DI11|SP13B_ARATH Squamosa promoter-binding-like protein 13B OS=Arabidopsis thaliana GN=SPL13B PE=3 SV=1//6.20861e-52
Cla002647	1263.3	768.946	0.71624	0.0014542	0.015292	up	sp|Q9FI46|CRL_ARATH Chromophore lyase CRL, chloroplastic OS=Arabidopsis thaliana GN=CRL PE=1 SV=1//7.45126e-120
Cla002690	2313.05	646.131	1.8399	7.8828e-17	1.1392e-14	up	sp|Q9FVQ4|PLGG1_ARATH Plastidal glycolate/glycerate translocator 1, chloroplastic OS=Arabidopsis thaliana GN=PLGG1 PE=2 SV=1//0
Cla002718	664.707	269.651	1.3016	0.00020135	0.0029869	up	sp|Q9FKB6|Y5880_ARATH BTB/POZ domain-containing protein At5g48800 OS=Arabidopsis thaliana GN=At5g48800 PE=2 SV=1//0
Cla002719	855.146	230.215	1.8932	8.6671e-12	5.9772e-10	up	sp|Q6GLM5|DESI1_XENLA Desumoylating isopeptidase 1 OS=Xenopus laevis GN=desi1 PE=2 SV=1//1.17834e-41
Cla002743	336.468	186.016	0.85504	0.0038904	0.033289	up	-//-
Cla002769	3017.19	516.064	2.5476	3.7791e-29	2.0075e-26	up	sp|Q9FNB0|CHLH_ARATH Magnesium-chelatase subunit ChlH, chloroplastic OS=Arabidopsis thaliana GN=CHLH PE=1 SV=1//0
Cla002793	2086.05	716.203	1.5423	6.9655e-12	4.8721e-10	up	sp|P42732|RR13_ARATH 30S ribosomal protein S13, chloroplastic OS=Arabidopsis thaliana GN=RPS13 PE=2 SV=1//1.35056e-82
Cla002814	5546.92	851.925	2.7029	7.6265e-35	5.7654e-32	up	sp|Q9LD45|BI1_ARATH Bax inhibitor 1 OS=Arabidopsis thaliana GN=BI-1 PE=1 SV=1//3.92175e-115
Cla002827	126.778	17.6959	2.8408	8.5648e-08	2.9795e-06	up	sp|Q9SZN7|HIP26_ARATH Heavy metal-associated isoprenylated plant protein 26 OS=Arabidopsis thaliana GN=HIPP26 PE=1 SV=1//8.20101e-11
Cla002856	3069.72	1597.93	0.94191	5.9213e-06	0.0001409	up	-//-
Cla002858	341.424	118.507	1.5266	8.62e-07	2.459e-05	up	sp|Q9LX31|GUN4C_ARATH Tetrapyrrole-binding protein, chloroplastic OS=Arabidopsis thaliana GN=GUN4 PE=1 SV=1//5.54615e-69
Cla002882	11.416	0	Inf	0.0052335	0.041511	up	-//-
Cla002884	508.735	99.9608	2.3475	2.9264e-16	3.9668e-14	up	sp|Q54NP8|KIF4_DICDI Kinesin-related protein 4 OS=Dictyostelium discoideum GN=kif4 PE=2 SV=1//4.37905e-104
Cla002889	118.07	13.5116	3.1274	4.9715e-05	0.00089285	up	sp|Q9SLG8|SSL2_ARATH Protein STRICTOSIDINE SYNTHASE-LIKE 2 OS=Arabidopsis thaliana GN=SSL2 PE=2 SV=1//2.54459e-109
Cla002892	2147.19	1381.6	0.63611	0.0027	0.025186	up	-//-
Cla002910	2201.21	744.386	1.5642	0.0013168	0.01412	up	-//-
Cla002911	17121.9	9331.1	0.87572	0.00013737	0.0021446	up	sp|Q9FKP2|CCX2_ARATH Cation/calcium exchanger 2 OS=Arabidopsis thaliana GN=CCX2 PE=3 SV=1//2.09527e-137
Cla002946	2414.7	1606.04	0.58834	0.0047929	0.038863	up	sp|Q55680|Y005_SYNY3 Uncharacterized protein sll0005 OS=Synechocystis sp. (strain PCC 6803 / Kazusa) GN=sll0005 PE=3 SV=1//9.00696e-126
Cla002983	4061.42	877.817	2.21	1.0702e-24	3.8953e-22	up	sp|Q9LKR8|RAF1_ARATH Rubisco accumulation factor 1, chloroplastic OS=Arabidopsis thaliana GN=RAF1 PE=2 SV=1//2.37635e-127
Cla003026	2901.09	1935.76	0.58369	0.0048392	0.039097	up	sp|Q93YN4|ELM1_ARATH Mitochondrial fission protein ELM1 OS=Arabidopsis thaliana GN=ELM1 PE=1 SV=1//0
Cla003070	4026.78	966.715	2.0585	2.469e-21	6.3852e-19	up	sp|Q949Y5|EGY1_ARATH Probable zinc metalloprotease EGY1, chloroplastic OS=Arabidopsis thaliana GN=EGY1 PE=2 SV=1//0
Cla003112	931.361	302.039	1.6246	2.3039e-07	7.387e-06	up	-//-
Cla003124	715.291	351.192	1.0263	4.6498e-05	0.00084622	up	sp|Q9LJE2|SYKM_ARATH Lysine--tRNA ligase, chloroplastic/mitochondrial OS=Arabidopsis thaliana GN=OVA5 PE=2 SV=1//7.20202e-105
Cla003125	832.055	489.658	0.7649	0.0011947	0.012917	up	sp|Q9LJE2|SYKM_ARATH Lysine--tRNA ligase, chloroplastic/mitochondrial OS=Arabidopsis thaliana GN=OVA5 PE=2 SV=1//3.75186e-87
Cla003133	239.299	12.938	4.2091	4.1723e-10	2.1637e-08	up	sp|Q7G191|ALDO4_ARATH Benzaldehyde dehydrogenase (NAD(+)) OS=Arabidopsis thaliana GN=AAO4 PE=1 SV=2//0
Cla003137	982.457	248.867	1.981	5.5371e-14	5.0856e-12	up	sp|Q9FGC7|ZEP_ARATH Zeaxanthin epoxidase, chloroplastic OS=Arabidopsis thaliana GN=ZEP PE=1 SV=1//2.81997e-06
Cla003184	791.13	459.652	0.78337	0.0011975	0.012939	up	-//-
Cla003194	70.6558	11.217	2.6551	1.1162e-05	0.00024651	up	sp|P19135|PER2_CUCSA Peroxidase 2 (Fragment) OS=Cucumis sativus PE=2 SV=1//3.67539e-135
Cla003230	87.4503	17.0024	2.3627	8.503e-06	0.00019388	up	sp|Q9SCU0|SDR2A_ARATH Short-chain dehydrogenase reductase 2a OS=Arabidopsis thaliana GN=SDR2a PE=3 SV=1//1.12744e-73
Cla003245	208.54	97.362	1.0989	0.0010485	0.011571	up	-//-
Cla003284	1261.61	342.939	1.8792	2.115e-15	2.5661e-13	up	sp|Q9M4Y3|RR10_MESCR 30S ribosomal protein S10, chloroplastic OS=Mesembryanthemum crystallinum GN=RPS10 PE=2 SV=1//1.23263e-81
Cla003286	356.028	108.711	1.7115	1.4296e-08	5.7462e-07	up	sp|Q9LK64|AB3C_ARATH ABC transporter C family member 3 OS=Arabidopsis thaliana GN=ABCC3 PE=1 SV=1//0
Cla003340	1501.51	867.164	0.79203	0.00036215	0.0048456	up	sp|Q84W65|SUFE1_ARATH SufE-like protein 1, chloroplastic/mitochondrial OS=Arabidopsis thaliana GN=SUFE1 PE=1 SV=2//8.13204e-121
Cla003357	110.199	36.6377	1.5887	0.00044097	0.0057399	up	-//-
Cla003403	31862.7	10234.2	1.6385	3.0282e-15	3.5855e-13	up	sp|P93824|ACCH6_ARATH 1-aminocyclopropane-1-carboxylate oxidase homolog 6 OS=Arabidopsis thaliana GN=At1g04350 PE=2 SV=1//1.14461e-104
Cla003404	639.179	323.159	0.98398	0.0022369	0.02169	up	sp|Q9FYK2|CML25_ARATH Probable calcium-binding protein CML25 OS=Arabidopsis thaliana GN=CML25 PE=2 SV=1//2.93303e-06
Cla003412	1339.38	897.105	0.57821	0.0063181	0.048283	up	sp|Q9SKN2|DRB2_ARATH Double-stranded RNA-binding protein 2 OS=Arabidopsis thaliana GN=DRB2 PE=1 SV=1//9.97835e-122
Cla003413	8878.5	4662.33	0.92927	4.0837e-06	0.00010147	up	sp|Q9SE43|REV_ARATH Homeobox-leucine zipper protein REVOLUTA OS=Arabidopsis thaliana GN=REV PE=1 SV=2//0
Cla003434	7672.12	4704.67	0.70553	0.00055579	0.0068965	up	sp|Q5BL31|CF106_DANRE Uncharacterized protein C6orf106 homolog OS=Danio rerio GN=zgc:101577 PE=2 SV=1//1.86187e-15
Cla003453	672.912	420.525	0.67823	0.0050712	0.040551	up	-//-
Cla003457	1226.24	755.314	0.69909	0.0017524	0.017865	up	sp|Q02166|TRPD_ARATH Anthranilate phosphoribosyltransferase, chloroplastic OS=Arabidopsis thaliana GN=PAT1 PE=2 SV=1//2.88258e-180
Cla003474	226.539	119.55	0.92215	0.0054947	0.043234	up	sp|Q681Y3|Y1099_ARATH Putative transferase At1g60990, chloroplastic OS=Arabidopsis thaliana GN=At1g60990 PE=1 SV=1//3.75025e-40
Cla003502	363.877	191.376	0.92704	0.0016274	0.0168	up	sp|Q9SR00|PP213_ARATH Pentatricopeptide repeat-containing protein At3g04760, chloroplastic OS=Arabidopsis thaliana GN=At3g04760 PE=2 SV=1//0
Cla003520	4777.61	2918.81	0.71091	0.0004681	0.0060094	up	sp|Q9SGD6|AROD6_ARATH Arogenate dehydratase/prephenate dehydratase 6, chloroplastic OS=Arabidopsis thaliana GN=ADT6 PE=1 SV=1//0
Cla003521	2045.78	978.337	1.0642	8.7317e-07	2.4843e-05	up	sp|Q3E7D0|NAT12_ARATH Nucleobase-ascorbate transporter 12 OS=Arabidopsis thaliana GN=NAT12 PE=1 SV=3//2.22076e-133
Cla003522	2247.88	964.702	1.2204	1.7851e-08	7.0538e-07	up	sp|Q3E7D0|NAT12_ARATH Nucleobase-ascorbate transporter 12 OS=Arabidopsis thaliana GN=NAT12 PE=1 SV=3//5.21569e-169
Cla003538	460.278	67.0487	2.7792	4.0772e-14	3.8343e-12	up	sp|O23193|CBSX1_ARATH CBS domain-containing protein CBSX1, chloroplastic OS=Arabidopsis thaliana GN=CBSX1 PE=1 SV=2//1.89998e-101
Cla003597	202.73	50.0559	2.018	9.9915e-05	0.0016297	up	sp|C0LGQ5|GSO1_ARATH LRR receptor-like serine/threonine-protein kinase GSO1 OS=Arabidopsis thaliana GN=GSO1 PE=2 SV=1//3.20154e-08
Cla003599	3293.62	2169.85	0.60208	0.0030845	0.027874	up	sp|Q6GQ39|TM135_XENLA Transmembrane protein 135 OS=Xenopus laevis GN=tmem135 PE=2 SV=1//4.56667e-08
Cla003602	1403.11	727.29	0.94803	3.0112e-05	0.00058425	up	-//-
Cla003604	1516.42	954.395	0.66801	0.002879	0.026467	up	-//-
Cla003615	379.325	38.4483	3.3024	2.8033e-22	7.8713e-20	up	sp|Q8KFI4|PHS_CHLTE Putative pterin-4-alpha-carbinolamine dehydratase OS=Chlorobium tepidum (strain ATCC 49652 / DSM 12025 / NBRC 103806 / TLS) GN=CT0342 PE=3 SV=1//1.25455e-17
Cla003668	4119.4	2216.85	0.89392	2.2046e-05	0.00044764	up	sp|Q9ZW85|LEUD3_ARATH 3-isopropylmalate dehydratase small subunit 3 OS=Arabidopsis thaliana GN=At2g43090 PE=1 SV=1//3.37004e-95
Cla003698	6299.58	2586.12	1.2845	8.5008e-10	4.1771e-08	up	-//-
Cla003741	24.669	3.06412	3.0092	0.0052583	0.041691	up	-//-
Cla003751	6285.3	3426.99	0.87504	2.8221e-05	0.00055469	up	sp|Q9FV46|ZDS_TARER Zeta-carotene desaturase, chloroplastic/chromoplastic OS=Tagetes erecta PE=2 SV=1//0
Cla003760	575.957	289.031	0.99474	0.00010573	0.0017104	up	-//-
Cla003763	1248.76	565.983	1.1417	4.3674e-07	1.3146e-05	up	-//-
Cla003774	3606.77	416.377	3.1147	2.0574e-15	2.5117e-13	up	sp|Q9SSS9|ATPD_ARATH ATP synthase subunit delta, chloroplastic OS=Arabidopsis thaliana GN=ATPD PE=1 SV=1//4.04667e-88
Cla003789	1694.19	852.269	0.99121	0.0009368	0.010588	up	sp|Q70II3|EF110_ARATH Ethylene-responsive transcription factor ERF110 OS=Arabidopsis thaliana GN=ERF110 PE=2 SV=2//7.07456e-28
Cla003830	434.157	205.335	1.0802	0.00010223	0.0016607	up	-//-
Cla003834	1044.23	536.6	0.96052	2.9279e-05	0.00056998	up	-//-
Cla003838	1918.57	1029.6	0.89795	4.1996e-05	0.00077872	up	sp|Q9LHQ6|OCT4_ARATH Organic cation/carnitine transporter 4 OS=Arabidopsis thaliana GN=OCT4 PE=2 SV=1//0
Cla003890	1722.06	989.553	0.79929	0.00015361	0.002368	up	-//-
Cla003891	2413.26	1317	0.87372	2.3196e-05	0.00046856	up	-//-
Cla003918	1831.7	214.26	3.0957	8.3719e-38	8.2275e-35	up	-//-
Cla003924	69.0536	14.6107	2.2407	8.3529e-05	0.0013984	up	sp|Q9SIC7|Y2142_ARATH B3 domain-containing protein At2g31420 OS=Arabidopsis thaliana GN=At2g31420 PE=3 SV=1//7.08305e-12
Cla003928	437.175	239.423	0.86865	0.0054175	0.042712	up	-//-
Cla003933	304.695	77.0241	1.984	8.6364e-10	4.2332e-08	up	sp|Q9CAC5|NDHL_ARATH NAD(P)H-quinone oxidoreductase subunit L, chloroplastic OS=Arabidopsis thaliana GN=ndhL PE=2 SV=1//1.84264e-54
Cla003985	4738.53	1615.18	1.5527	2.5381e-14	2.5195e-12	up	sp|Q9FN03|UVR8_ARATH Ultraviolet-B receptor UVR8 OS=Arabidopsis thaliana GN=UVR8 PE=1 SV=1//4.47024e-10
Cla003995	469.363	151.901	1.6276	8.8512e-05	0.0014718	up	sp|O98997|RCA_VIGRR Ribulose bisphosphate carboxylase/oxygenase activase, chloroplastic OS=Vigna radiata var. radiata GN=RCA PE=2 SV=2//0
Cla004005	245.629	107.622	1.1905	0.00017853	0.0026972	up	sp|O48818|EXPA4_ARATH Expansin-A4 OS=Arabidopsis thaliana GN=EXPA4 PE=1 SV=1//2.44832e-162
Cla004048	3775.52	1404.79	1.4263	2.0421e-11	1.3247e-09	up	sp|Q86TU7|SETD3_HUMAN Histone-lysine N-methyltransferase setd3 OS=Homo sapiens GN=SETD3 PE=1 SV=1//5.15091e-19
Cla004062	929.288	574.155	0.69468	0.0020463	0.020232	up	sp|Q6M9M7|Y1998_PARUW Uncharacterized RNA methyltransferase pc1998 OS=Protochlamydia amoebophila (strain UWE25) GN=pc1998 PE=3 SV=1//1.95082e-77
Cla004063	4582.79	1532.57	1.5803	5.7005e-14	5.1872e-12	up	sp|P82024|RR21_SPIOL 30S ribosomal protein S21, chloroplastic (Fragment) OS=Spinacia oleracea GN=rps21 PE=1 SV=1//2.61968e-15
Cla004072	1402.96	847.009	0.72803	0.00075558	0.0088768	up	sp|Q8TP15|HTPX2_METAC Protease HtpX homolog 2 OS=Methanosarcina acetivorans (strain ATCC 35395 / DSM 2834 / JCM 12185 / C2A) GN=htpX2 PE=3 SV=1//6.28952e-11
Cla004090	1014.72	631.073	0.6852	0.0021489	0.021087	up	sp|P0DI11|SP13B_ARATH Squamosa promoter-binding-like protein 13B OS=Arabidopsis thaliana GN=SPL13B PE=3 SV=1//3.26762e-41
Cla004103	3230.79	1654.6	0.9654	3.8145e-06	9.5388e-05	up	sp|Q7TV13|EFTS_PROMM Elongation factor Ts OS=Prochlorococcus marinus (strain MIT 9313) GN=tsf PE=3 SV=1//9.66146e-79
Cla004109	1314.74	819.043	0.68277	0.0030046	0.027327	up	sp|Q8W593|LGUC_ARATH Probable lactoylglutathione lyase, chloroplast OS=Arabidopsis thaliana GN=At1g67280 PE=1 SV=1//3.00442e-178
Cla004173	743.451	258.214	1.5257	0.0015273	0.015993	up	sp|P51910|APOD_MOUSE Apolipoprotein D OS=Mus musculus GN=Apod PE=2 SV=1//1.6725e-10
Cla004194	169.638	29.7944	2.5093	2.5189e-06	6.5574e-05	up	-//-
Cla004219	304.552	146.289	1.0579	0.00056138	0.0069439	up	-//-
Cla004234	223.102	88.1564	1.3396	4.5494e-05	0.00083181	up	sp|Q9ZNX9|SIGE_ARATH RNA polymerase sigma factor sigE, chloroplastic/mitochondrial OS=Arabidopsis thaliana GN=SIGE PE=1 SV=1//0
Cla004239	1329.99	555.854	1.2586	4.3886e-05	0.00080842	up	-//-
Cla004241	67.4989	21.399	1.6573	0.0026774	0.025035	up	sp|O65717|CNGC1_ARATH Cyclic nucleotide-gated ion channel 1 OS=Arabidopsis thaliana GN=CNGC1 PE=1 SV=1//3.74171e-139
Cla004248	14092.1	2492.33	2.4993	3.7875e-17	5.8616e-15	up	sp|Q9LV04|PAP14_ARATH Probable plastid-lipid-associated protein 14, chloroplastic OS=Arabidopsis thaliana GN=PAP14 PE=1 SV=1//0
Cla004259	703.464	114.952	2.6134	0.0019809	0.019634	up	sp|Q94A79|DMS3_ARATH Protein DEFECTIVE IN MERISTEM SILENCING 3 OS=Arabidopsis thaliana GN=DMS3 PE=1 SV=1//2.60603e-126
Cla004268	314.029	135.635	1.2112	8.7692e-05	0.0014594	up	sp|Q8VZV9|PTA7_ARATH Protein PLASTID TRANSCRIPTIONALLY ACTIVE 7 OS=Arabidopsis thaliana GN=PTAC7 PE=1 SV=1//8.51974e-64
Cla004269	3290.98	2153.17	0.61205	0.0030843	0.027874	up	sp|P49599|P2C57_ARATH Protein phosphatase 2C 57 OS=Arabidopsis thaliana GN=PPH1 PE=1 SV=2//1.07619e-171
Cla004271	1577.96	287.209	2.4579	7.7341e-26	3.167e-23	up	sp|P81760|TL17_ARATH Thylakoid lumenal 17.4 kDa protein, chloroplastic OS=Arabidopsis thaliana GN=At5g53490 PE=1 SV=2//1.33713e-100
Cla004277	866.196	145.343	2.5752	7.1529e-23	2.1302e-20	up	sp|Q94A65|STR14_ARATH Rhodanese-like domain-containing protein 14, chloroplastic OS=Arabidopsis thaliana GN=At4g27700 PE=2 SV=1//2.87549e-92
Cla004284	2341.38	1418.28	0.72322	0.00069815	0.0082813	up	sp|Q0VC50|RT4I1_BOVIN Reticulon-4-interacting protein 1, mitochondrial OS=Bos taurus GN=RTN4IP1 PE=2 SV=1//5.05154e-46
Cla004286	595.591	347.833	0.77593	0.001977	0.019616	up	-//-
Cla004294	272.065	40.8694	2.7349	7.5152e-15	8.116e-13	up	sp|Q9LUH3|LAL5_ARATH MATE efflux family protein LAL5 OS=Arabidopsis thaliana GN=LAL5 PE=2 SV=1//5.41088e-162
Cla004295	1308.17	331.383	1.981	6.3883e-17	9.5849e-15	up	sp|E0CSI1|MTBC1_VITVI Probable bifunctional methylthioribulose-1-phosphate dehydratase/enolase-phosphatase E1 1 OS=Vitis vinifera GN=VIT_19s0014g02480 PE=3 SV=2//5.28323e-32
Cla004297	2429.02	1028.25	1.2402	2.1366e-05	0.00043653	up	sp|Q5QQ53|XYLT_DROPS Xylosyltransferase oxt OS=Drosophila pseudoobscura pseudoobscura GN=oxt PE=2 SV=1//9.09485e-21
Cla004311	30.6032	2.9184	3.3904	0.00087172	0.0099499	up	sp|U3U992|UGT8_CATRO 7-deoxyloganetic acid glucosyltransferase OS=Catharanthus roseus GN=UGT709C2 PE=1 SV=1//1.66943e-177
Cla004347	3740.64	2355.81	0.66706	0.0014509	0.015267	up	sp|Q39033|PLCD2_ARATH Phosphoinositide phospholipase C 2 OS=Arabidopsis thaliana GN=PLC2 PE=1 SV=1//0
Cla004363	2906.58	1281.54	1.1814	2.9979e-08	1.131e-06	up	-//-
Cla004396	1542.28	586.985	1.3937	6.7855e-07	1.9758e-05	up	sp|O22822|U74F2_ARATH UDP-glycosyltransferase 74F2 OS=Arabidopsis thaliana GN=UGT74F2 PE=1 SV=1//5.36801e-168
Cla004409	1964.77	1204.57	0.70584	0.00098545	0.011018	up	sp|Q9SA22|P2C06_ARATH Probable protein phosphatase 2C 6 OS=Arabidopsis thaliana GN=At1g16220 PE=2 SV=1//6.88518e-128
Cla004410	1268.47	665.207	0.93122	4.6489e-05	0.00084622	up	sp|Q8RXZ4|P2C18_ARATH Probable protein phosphatase 2C 18 OS=Arabidopsis thaliana GN=At1g79630 PE=2 SV=1//1.68076e-09
Cla004412	5778.89	199.211	4.8584	7.823e-89	5.1253e-85	up	sp|B2V855|GATA_SULSY Glutamyl-tRNA(Gln) amidotransferase subunit A OS=Sulfurihydrogenibium sp. (strain YO3AOP1) GN=gatA PE=3 SV=1//3.05199e-50
Cla004429	1688.23	1065.4	0.66412	0.0014282	0.015084	up	-//-
Cla004463	1453.66	283.367	2.3589	1.0613e-22	3.0232e-20	up	sp|Q9FM67|TI205_ARATH Protein TIC 20-v, chloroplastic OS=Arabidopsis thaliana GN=TIC20-V PE=2 SV=1//2.45002e-80
Cla004468	57.7952	9.82675	2.5562	0.00061093	0.0074398	up	sp|Q9FG72|OPT1_ARATH Oligopeptide transporter 1 OS=Arabidopsis thaliana GN=OPT1 PE=2 SV=1//0
Cla004483	13299.5	770.539	4.1094	2.7702e-25	1.1112e-22	up	sp|Q9S7N7|PSAG_ARATH Photosystem I reaction center subunit V, chloroplastic OS=Arabidopsis thaliana GN=PSAG PE=2 SV=1//1.89691e-66
Cla004486	668.724	331.283	1.0133	0.0018703	0.018762	up	sp|Q52K82|CML21_ARATH Probable calcium-binding protein CML21 OS=Arabidopsis thaliana GN=CML21 PE=2 SV=1//1.43621e-104
Cla004495	620.401	269.62	1.2023	4.4495e-06	0.00010973	up	-//-
Cla004497	1961.23	1065.39	0.88037	7.3261e-05	0.00125	up	sp|Q94EH2|TI222_ARATH Mitochondrial import inner membrane translocase subunit TIM22-2 OS=Arabidopsis thaliana GN=TIM22-2 PE=1 SV=1//2.22201e-63
Cla004534	589.512	217.48	1.4386	3.6183e-08	1.3521e-06	up	sp|Q8H1D6|RBK1_ARATH Receptor-like cytosolic serine/threonine-protein kinase RBK1 OS=Arabidopsis thaliana GN=RBK1 PE=1 SV=1//0
Cla004549	1010.81	624.697	0.69429	0.0024654	0.02341	up	sp|Q55909|Y305_SYNY3 TVP38/TMEM64 family membrane protein slr0305 OS=Synechocystis sp. (strain PCC 6803 / Kazusa) GN=slr0305 PE=3 SV=1//2.83938e-11
Cla004577	35.4753	0	Inf	5.8837e-08	2.1065e-06	up	-//-
Cla004580	3508.63	2351.1	0.57757	0.0061089	0.047031	up	sp|Q91Z38|TTC1_MOUSE Tetratricopeptide repeat protein 1 OS=Mus musculus GN=Ttc1 PE=2 SV=1//8.0146e-14
Cla004584	6769.87	2712.37	1.3196	3.7367e-10	1.9638e-08	up	sp|Q56X52|AOX4_ARATH Ubiquinol oxidase 4, chloroplastic/chromoplastic OS=Arabidopsis thaliana GN=AOX4 PE=1 SV=2//3.46575e-156
Cla004601	2865.05	1680.22	0.76991	0.00021832	0.0031904	up	-//-
Cla004602	1390.97	644.479	1.1099	2.3279e-06	6.1322e-05	up	sp|Q5XEZ5|CSC1_ARATH Calcium permeable stress-gated cation channel 1 OS=Arabidopsis thaliana GN=CSC1 PE=2 SV=1//2.10031e-83
Cla004604	515.472	286.204	0.84885	0.00095395	0.010751	up	sp|P42856|ZB14_MAIZE 14 kDa zinc-binding protein OS=Zea mays GN=ZBP14 PE=1 SV=1//2.08852e-42
Cla004606	1718.2	804.135	1.0954	2.3911e-05	0.00048055	up	sp|Q5S2C4|NCKP1_ARATH Protein NAP1 OS=Arabidopsis thaliana GN=NAP1 PE=1 SV=2//0
Cla004635	241.013	117.283	1.0391	0.0012479	0.013434	up	-//-
Cla004644	615.049	151.086	2.0253	3.7339e-14	3.5626e-12	up	sp|Q0WPX7|BAG2_ARATH BAG family molecular chaperone regulator 2 OS=Arabidopsis thaliana GN=BAG2 PE=1 SV=1//4.07644e-13
Cla004656	1125.86	183.112	2.6202	1.3486e-26	6.1645e-24	up	-//-
Cla004685	2336.06	1494.63	0.6443	0.0027295	0.025375	up	sp|Q9M2T9|SYMM_ARATH Methionine--tRNA ligase, chloroplastic/mitochondrial OS=Arabidopsis thaliana GN=OVA1 PE=2 SV=1//0
Cla004695	2629.24	786.425	1.7413	0.0039906	0.03397	up	sp|O80638|WTR14_ARATH WAT1-related protein At2g39510 OS=Arabidopsis thaliana GN=At2g39510 PE=2 SV=1//6.4081e-140
Cla004698	527.151	317.846	0.72989	0.0041639	0.035065	up	sp|O80634|PNSL1_ARATH Photosynthetic NDH subunit of lumenal location 1, chloroplastic OS=Arabidopsis thaliana GN=PNSL1 PE=1 SV=2//3.9379e-84
Cla004704	306.161	148.94	1.0396	0.00061653	0.0074941	up	sp|P82538|PPL1_ARATH PsbP-like protein 1, chloroplastic OS=Arabidopsis thaliana GN=PPL1 PE=1 SV=1//1.08535e-49
Cla004712	1023.13	598.392	0.77382	0.00073291	0.0086467	up	-//-
Cla004739	2684.77	1724.25	0.63883	0.002766	0.025656	up	-//-
Cla004746	1249.51	77.5856	4.0094	4.0016e-49	8.7391e-46	up	sp|P12360|CB11_SOLLC Chlorophyll a-b binding protein 6A, chloroplastic OS=Solanum lycopersicum GN=CAB6A PE=2 SV=1//6.68785e-154
Cla004755	835.75	379.59	1.1386	2.6806e-06	6.9235e-05	up	sp|P14133|ASO_CUCSA L-ascorbate oxidase OS=Cucumis sativus PE=1 SV=1//0
Cla004756	2497.05	1120.2	1.1565	1.5242e-07	5.1297e-06	up	-//-
Cla004822	221.703	85.3439	1.3773	3.8999e-05	0.00073142	up	-//-
Cla004837	999.139	341.433	1.5491	2.0776e-10	1.1406e-08	up	sp|Q9FJP3|RK29_ARATH 50S ribosomal protein L29, chloroplastic OS=Arabidopsis thaliana GN=RPL29 PE=1 SV=1//6.33224e-58
Cla004848	1604.56	901.166	0.83232	0.00023791	0.0034232	up	sp|Q8LDD3|CUT1D_ARATH Protein CURVATURE THYLAKOID 1D, chloroplastic OS=Arabidopsis thaliana GN=CURT1D PE=1 SV=1//1.1383e-34
Cla004869	143.051	50.4559	1.5034	0.00018251	0.0027405	up	sp|Q56Y42|PLR1_ARATH Pyridoxal reductase, chloroplastic OS=Arabidopsis thaliana GN=PLR1 PE=1 SV=1//0
Cla004902	982.218	611.477	0.68375	0.0018351	0.018506	up	sp|O65717|CNGC1_ARATH Cyclic nucleotide-gated ion channel 1 OS=Arabidopsis thaliana GN=CNGC1 PE=1 SV=1//0
Cla004917	1372.86	852.764	0.68696	0.002174	0.021291	up	-//-
Cla004920	89.3707	21.1665	2.078	0.0024384	0.023209	up	sp|P17541|CHIA_CUCSA Acidic endochitinase OS=Cucumis sativus PE=1 SV=1//4.58519e-156
Cla004937	3351.16	2155.42	0.63669	0.0025207	0.023831	up	sp|P30707|RL9_PEA 60S ribosomal protein L9 OS=Pisum sativum GN=RPL9 PE=2 SV=1//1.034e-124
Cla004939	1259.18	703.907	0.83903	0.00029122	0.0040481	up	-//-
Cla004941	1705.13	1147.63	0.57123	0.0057532	0.044678	up	sp|Q8H0W3|RVE6_ARATH Protein REVEILLE 6 OS=Arabidopsis thaliana GN=RVE6 PE=2 SV=1//1.65898e-107
Cla004942	187.816	67.703	1.472	0.0038308	0.032922	up	sp|A7PZL3|PGLR_VITVI Probable polygalacturonase OS=Vitis vinifera GN=GSVIVT00026920001 PE=1 SV=1//0
Cla004955	1224.04	794.871	0.62286	0.0056917	0.04427	up	sp|Q6RVV4|TIC32_PEA Short-chain dehydrogenase TIC 32, chloroplastic OS=Pisum sativum GN=TIC32 PE=1 SV=1//3.84938e-150
Cla004974	41.5712	3.95511	3.3938	3.651e-05	0.000694	up	sp|O82799|NGA1_ARATH B3 domain-containing transcription factor NGA1 OS=Arabidopsis thaliana GN=NGA1 PE=1 SV=1//1.36199e-59
Cla004983	2226.48	792.539	1.4902	1.5409e-11	1.0232e-09	up	sp|Q9MAP3|RK11_ARATH 50S ribosomal protein L11, chloroplastic OS=Arabidopsis thaliana GN=RPL11 PE=2 SV=1//1.72298e-51
Cla004989	14064.1	8260.72	0.76768	0.00063513	0.0076821	up	sp|O82627|SSG1_ANTMA Granule-bound starch synthase 1, chloroplastic/amyloplastic OS=Antirrhinum majus GN=WAXY PE=2 SV=1//0
Cla004993	64.4759	21.5005	1.5844	0.0054537	0.04298	up	sp|Q9FLE8|Y5986_ARATH Uncharacterized protein At5g39865 OS=Arabidopsis thaliana GN=At5g39865 PE=2 SV=1//2.29682e-42
Cla005003	9414.82	5276.05	0.83547	0.0020071	0.019884	up	sp|Q9SS31|CML36_ARATH Probable calcium-binding protein CML36 OS=Arabidopsis thaliana GN=CML36 PE=2 SV=1//2.13735e-50
Cla005011	2327.92	1326.11	0.81184	0.00012631	0.0019973	up	sp|Q43503|LCYB_SOLLC Lycopene beta cyclase, chloroplastic OS=Solanum lycopersicum GN=LCY1 PE=1 SV=1//0
Cla005043	4641.92	3157.48	0.55595	0.0046958	0.038329	up	sp|Q9SCQ6|IDD2_ARATH Protein indeterminate-domain 2 OS=Arabidopsis thaliana GN=IDD2 PE=2 SV=1//3.37761e-85
Cla005055	481.805	126.096	1.9339	1.0596e-11	7.1817e-10	up	sp|Q9LXX5|PPD6_ARATH PsbP domain-containing protein 6, chloroplastic OS=Arabidopsis thaliana GN=PPD6 PE=1 SV=1//4.40686e-115
Cla005062	2694.08	793.568	1.7634	1.2472e-15	1.5515e-13	up	sp|P25864|RK9_ARATH 50S ribosomal protein L9, chloroplastic OS=Arabidopsis thaliana GN=RPL9 PE=2 SV=1//7.60958e-44
Cla005133	4091.09	1921.07	1.0906	1.8846e-07	6.1944e-06	up	sp|Q8L7S8|RH3_ARATH DEAD-box ATP-dependent RNA helicase 3, chloroplastic OS=Arabidopsis thaliana GN=RH3 PE=1 SV=2//0
Cla005153	8552.75	4869.76	0.81254	4.7569e-05	0.00086331	up	sp|O73944|PCP_PYRFU Pyrrolidone-carboxylate peptidase OS=Pyrococcus furiosus (strain ATCC 43587 / DSM 3638 / JCM 8422 / Vc1) GN=pcp PE=1 SV=1//1.42361e-19
Cla005214	19.4422	0.607042	5.0013	0.0011556	0.012582	up	sp|Q9M9W7|PME22_ARATH Putative pectinesterase/pectinesterase inhibitor 22 OS=Arabidopsis thaliana GN=PME22 PE=3 SV=1//0
Cla005219	813.787	227.49	1.8388	5.3086e-08	1.918e-06	up	-//-
Cla005227	694.477	76.1331	3.1893	4.8686e-05	0.0008779	up	sp|Q8H1F5|IDD7_ARATH Protein indeterminate-domain 7 OS=Arabidopsis thaliana GN=IDD7 PE=2 SV=1//5.14345e-107
Cla005248	22866.1	11993.8	0.93092	0.00010132	0.0016485	up	sp|Q94BT9|ATOX1_ARATH Copper transport protein ATX1 OS=Arabidopsis thaliana GN=ATX1 PE=1 SV=1//1.33364e-10
Cla005262	244.701	61.5774	1.9905	1.0468e-08	4.3499e-07	up	-//-
Cla005271	39.337	8.46395	2.2165	0.0038111	0.032811	up	-//-
Cla005289	52.2585	5.84293	3.1609	0.00038963	0.005171	up	sp|Q8LC95|ENL3_ARATH Early nodulin-like protein 3 OS=Arabidopsis thaliana GN=At5g25090 PE=1 SV=2//5.04015e-28
Cla005294	619.689	136.819	2.1793	5.6896e-15	6.4251e-13	up	sp|Q8VY88|LTD_ARATH Protein LHCP TRANSLOCATION DEFECT OS=Arabidopsis thaliana GN=LTD PE=1 SV=1//2.90971e-71
Cla005332	3103.77	1080.94	1.5217	3.8585e-11	2.3924e-09	up	sp|Q43087|PYRB2_PEA Aspartate carbamoyltransferase 2, chloroplastic OS=Pisum sativum GN=PYRB2 PE=2 SV=1//0
Cla005337	148.231	27.9159	2.4087	1.7649e-08	6.9936e-07	up	sp|Q9ZU91|E133_ARATH Glucan endo-1,3-beta-glucosidase 3 OS=Arabidopsis thaliana GN=At2g01630 PE=1 SV=2//7.73167e-114
Cla005341	514.119	257.116	0.99968	0.00012782	0.0020163	up	sp|Q8S9L5|TIG_ARATH Trigger factor-like protein TIG, Chloroplastic OS=Arabidopsis thaliana GN=TIG PE=2 SV=1//0
Cla005344	4319.56	1857.3	1.2177	1.3053e-08	5.3009e-07	up	sp|P21357|AROF_SOLTU Phospho-2-dehydro-3-deoxyheptonate aldolase 1, chloroplastic OS=Solanum tuberosum GN=SHKA PE=1 SV=2//0
Cla005356	37.4761	7.89495	2.247	0.0031535	0.028316	up	-//-
Cla005359	786.538	347.128	1.18	2.0074e-06	5.3391e-05	up	sp|Q42545|FTSZ1_ARATH Cell division protein FtsZ homolog 1, chloroplastic OS=Arabidopsis thaliana GN=FTSZ1 PE=1 SV=2//0
Cla005382	3136.36	1703.1	0.88093	2.9628e-05	0.00057601	up	sp|Q93ZB6|DCUP1_ARATH Uroporphyrinogen decarboxylase 1, chloroplastic OS=Arabidopsis thaliana GN=HEME1 PE=2 SV=2//0
Cla005387	353.405	176.297	1.0033	0.00032269	0.0044198	up	sp|Q9MAH4|AB10G_ARATH ABC transporter G family member 10 OS=Arabidopsis thaliana GN=ABCG10 PE=3 SV=1//0
Cla005398	7626.29	3944.61	0.9511	0.00023738	0.0034181	up	sp|Q9Y5Z4|HEBP2_HUMAN Heme-binding protein 2 OS=Homo sapiens GN=HEBP2 PE=1 SV=1//4.63018e-23
Cla005410	399.54	11.6674	5.0978	2.1145e-37	1.9791e-34	up	sp|Q03666|GSTX4_TOBAC Probable glutathione S-transferase OS=Nicotiana tabacum PE=2 SV=1//2.35081e-107
Cla005412	220.043	19.9087	3.4663	3.3782e-17	5.3548e-15	up	sp|Q9C8M5|WAG1_ARATH Serine/threonine-protein kinase WAG1 OS=Arabidopsis thaliana GN=WAG1 PE=2 SV=1//9.55584e-162
Cla005416	241.928	86.3831	1.4858	9.8587e-06	0.0002207	up	-//-
Cla005420	21374.1	3507.54	2.6073	5.6678e-23	1.7139e-20	up	sp|Q40519|PSBR_TOBAC Photosystem II 10 kDa polypeptide, chloroplastic OS=Nicotiana tabacum GN=PSBR PE=2 SV=1//8.55425e-57
Cla005424	513.793	270.515	0.92548	0.00575	0.04467	up	sp|F4IDQ5|JASON_ARATH Protein JASON OS=Arabidopsis thaliana GN=JASON PE=2 SV=1//1.08049e-93
Cla005425	1799.09	569.928	1.6584	4.4263e-13	3.625e-11	up	sp|Q9SSU8|PSY_DAUCA Phytoene synthase, chloroplastic OS=Daucus carota GN=PSY PE=2 SV=1//1.87439e-177
Cla005429	20897.6	2590.2	3.0122	5.1702e-33	3.5042e-30	up	sp|Q9SLQ8|PSBP_CUCSA Oxygen-evolving enhancer protein 2, chloroplastic OS=Cucumis sativus GN=PSBP PE=2 SV=1//4.99594e-174
Cla005445	457.978	191.424	1.2585	5.1184e-06	0.00012451	up	sp|O48921|C97B2_SOYBN Cytochrome P450 97B2, chloroplastic OS=Glycine max GN=CYP97B2 PE=2 SV=1//0
Cla005456	34009.2	14617.2	1.2183	4.6375e-08	1.7098e-06	up	-//-
Cla005539	3385.14	2187.54	0.62991	0.0028072	0.025923	up	sp|Q9XGM1|VATD_ARATH V-type proton ATPase subunit D OS=Arabidopsis thaliana GN=VHA-D PE=1 SV=2//1.0063e-161
Cla005544	9223	6035.3	0.61181	0.0027295	0.025375	up	sp|Q4UKR8|HSPC2_RICFE Small heat shock protein C2 OS=Rickettsia felis (strain ATCC VR-1525 / URRWXCal2) GN=hspC2 PE=3 SV=1//1.71644e-15
Cla005550	1209.63	757.728	0.67481	0.0022333	0.021667	up	sp|B9DFG3|ISE2_ARATH DEAD-box ATP-dependent RNA helicase ISE2, chloroplastic OS=Arabidopsis thaliana GN=ISE2 PE=1 SV=2//0
Cla005556	1495.35	845.98	0.82179	0.00012288	0.0019556	up	-//-
Cla005558	3542.24	1632.36	1.1177	1.1822e-07	4.0553e-06	up	-//-
Cla005564	1084.65	667.978	0.69936	0.0025545	0.024104	up	sp|Q9C4Z7|MINE1_ARATH Cell division topological specificity factor homolog, chloroplastic OS=Arabidopsis thaliana GN=MINE1 PE=1 SV=1//2.50738e-71
Cla005570	2031.11	1019.84	0.99393	3.1609e-06	8.0475e-05	up	sp|Q6R8G7|PHO13_ARATH Phosphate transporter PHO1 homolog 3 OS=Arabidopsis thaliana GN=PHO1;H3 PE=2 SV=2//0
Cla005572	756.991	349.744	1.114	6.0721e-06	0.00014414	up	sp|P94026|RBCMT_TOBAC Ribulose-1,5 bisphosphate carboxylase/oxygenase large subunit N-methyltransferase, chloroplastic OS=Nicotiana tabacum GN=RBCMT PE=2 SV=1//0
Cla005582	1043.32	507.107	1.0408	9.3504e-06	0.00021124	up	sp|Q8W206|CSN6A_ARATH COP9 signalosome complex subunit 6a OS=Arabidopsis thaliana GN=CSN6A PE=1 SV=2//7.45903e-99
Cla005583	3364.48	1904.62	0.82088	7.3864e-05	0.0012591	up	sp|P42762|CLPD_ARATH Chaperone protein ClpD, chloroplastic OS=Arabidopsis thaliana GN=CLPD PE=1 SV=1//3.16781e-83
Cla005589	2352.16	1408.55	0.73978	0.00062464	0.0075832	up	sp|Q0WLR1|QKIL1_ARATH KH domain-containing protein At4g26480 OS=Arabidopsis thaliana GN=At4g26480 PE=2 SV=1//1.89649e-54
Cla005596	1814.85	596.239	1.6059	1.1161e-12	8.7395e-11	up	-//-
Cla005597	3568.49	2172.42	0.71601	0.00082043	0.0094856	up	sp|Q8LB10|CLPR4_ARATH ATP-dependent Clp protease proteolytic subunit-related protein 4, chloroplastic OS=Arabidopsis thaliana GN=CLPR4 PE=1 SV=1//1.90165e-145
Cla005606	5866.34	1586.76	1.8864	4.2336e-19	8.4909e-17	up	sp|Q8W463|RK191_ARATH 50S ribosomal protein L19-1, chloroplastic OS=Arabidopsis thaliana GN=At4g17560 PE=2 SV=1//2.58087e-55
Cla005613	1452.38	475.545	1.6108	1.9807e-06	5.2822e-05	up	sp|O80337|EF100_ARATH Ethylene-responsive transcription factor 1A OS=Arabidopsis thaliana GN=ERF1A PE=1 SV=2//5.74219e-61
Cla005615	3645.14	899.183	2.0193	9.2288e-21	2.2674e-18	up	sp|Q8L7W2|NUDT8_ARATH Nudix hydrolase 8 OS=Arabidopsis thaliana GN=NUDT8 PE=2 SV=2//2.94956e-128
Cla005637	1136.13	735.59	0.62715	0.0064339	0.048882	up	sp|O48593|SYNO_ARATH Asparagine--tRNA ligase, chloroplastic/mitochondrial OS=Arabidopsis thaliana GN=SYNO PE=2 SV=3//0
Cla005676	38.3772	2.12465	4.175	0.00018274	0.0027418	up	sp|Q6H668|YAB4_ORYSJ Protein YABBY 4 OS=Oryza sativa subsp. japonica GN=YAB4 PE=2 SV=1//1.91635e-51
Cla005678	119.036	33.0227	1.8499	0.00011721	0.0018791	up	sp|Q9ZUZ3|SAU32_ARATH Auxin-responsive protein SAUR32 OS=Arabidopsis thaliana GN=SAUR32 PE=2 SV=1//3.10605e-19
Cla005682	25088.7	10195.2	1.2991	1.7717e-10	9.8931e-09	up	-//-
Cla005695	280.789	128.706	1.1254	0.00023661	0.003412	up	-//-
Cla005762	3795.73	2473.8	0.61764	0.002418	0.02307	up	sp|O23627|SYGM1_ARATH Glycine--tRNA ligase, mitochondrial 1 OS=Arabidopsis thaliana GN=At1g29880 PE=1 SV=1//0
Cla005767	1556.5	958.836	0.69895	0.0018112	0.018294	up	-//-
Cla005772	8323.39	4916.38	0.75957	0.00039319	0.0052138	up	sp|Q8GXZ3|Y5102_ARATH Serine/threonine-protein kinase At5g01020 OS=Arabidopsis thaliana GN=At5g01020 PE=1 SV=1//2.35275e-91
Cla005811	9316.03	5748.17	0.69661	0.0003871	0.0051478	up	sp|Q94B71|OBE3_ARATH Protein OBERON 3 OS=Arabidopsis thaliana GN=OBE3 PE=1 SV=1//0
Cla005862	3250.68	1654.9	0.974	3.6844e-06	9.2369e-05	up	sp|P55826|PPOC_ARATH Protoporphyrinogen oxidase 1, chloroplastic OS=Arabidopsis thaliana GN=PPOX1 PE=1 SV=1//0
Cla005879	215.6	87.9868	1.293	0.00094365	0.010653	up	-//-
Cla005894	2140.32	970.473	1.1411	1.406e-07	4.781e-06	up	-//-
Cla005909	1068.87	489.896	1.1255	1.5812e-06	4.3106e-05	up	-//-
Cla005910	1951.01	406.38	2.2633	9.7242e-10	4.7309e-08	up	sp|Q9C826|ABA2_ARATH Xanthoxin dehydrogenase OS=Arabidopsis thaliana GN=ABA2 PE=1 SV=1//3.22833e-87
Cla005911	1029.71	669.894	0.62024	0.0046413	0.038034	up	-//-
Cla005927	581.967	252.408	1.2052	3.3106e-06	8.4069e-05	up	sp|Q9LSE4|CCB1_ARATH Protein COFACTOR ASSEMBLY OF COMPLEX C SUBUNIT B CCB1, chloroplastic OS=Arabidopsis thaliana GN=CCB1 PE=1 SV=1//9.89888e-100
Cla005946	518.367	293.989	0.81821	0.00078029	0.0091271	up	sp|Q6NM73|CRRS3_ARATH Cysteine-rich repeat secretory protein 3 OS=Arabidopsis thaliana GN=CRRSP3 PE=1 SV=1//6.27895e-63
Cla005959	334.214	151.58	1.1407	0.00060727	0.0074045	up	sp|Q9SFC6|GDIR_ARATH Rho GDP-dissociation inhibitor 1 OS=Arabidopsis thaliana GN=GDI1 PE=1 SV=1//1.10539e-59
Cla005974	1237.93	655.665	0.91689	8.6624e-05	0.0014453	up	sp|Q94K75|RHON1_ARATH Rho-N domain-containing protein 1, chloroplastic OS=Arabidopsis thaliana GN=RHON1 PE=1 SV=1//4.4432e-59
Cla006029	1893.81	1160.07	0.70709	0.0015989	0.016548	up	sp|Q9LY74|BQMT_ARATH 2-methyl-6-phytyl-1,4-hydroquinone methyltransferase, chloroplastic OS=Arabidopsis thaliana GN=VTE3 PE=1 SV=1//0
Cla006049	2397.86	1438.58	0.7371	0.00046617	0.0059925	up	sp|Q9M1X0|RRFC_ARATH Ribosome-recycling factor, chloroplastic OS=Arabidopsis thaliana GN=RRF PE=2 SV=2//2.80522e-66
Cla006051	1104.38	533.099	1.0508	8.1769e-06	0.00018819	up	sp|Q8H1F6|DGP3_ARATH DAR GTPase 3, chloroplastic OS=Arabidopsis thaliana GN=DGP3 PE=2 SV=1//1.21817e-171
Cla006052	377.798	40.4839	3.2222	1.3823e-12	1.0739e-10	up	sp|Q9LYA9|CP41A_ARATH Chloroplast stem-loop binding protein of 41 kDa a, chloroplastic OS=Arabidopsis thaliana GN=CSP41A PE=1 SV=1//0
Cla006055	2049.75	1344.59	0.60828	0.0029161	0.026746	up	sp|Q1KPV0|FZL_ARATH Probable transmembrane GTPase FZO-like, chloroplastic OS=Arabidopsis thaliana GN=FZL PE=1 SV=1//0
Cla006064	3006.09	375.105	3.0025	0.00051136	0.006476	up	sp|Q9LS23|ALMTD_ARATH Aluminum-activated malate transporter 13 OS=Arabidopsis thaliana GN=ALMT13 PE=2 SV=1//1.76001e-85
Cla006123	222088	140418	0.6614	0.00067335	0.0080356	up	sp|Q94A08|RFS2_ARATH Probable galactinol--sucrose galactosyltransferase 2 OS=Arabidopsis thaliana GN=RFS2 PE=2 SV=2//0
Cla006138	1246.63	765.905	0.7028	0.0021934	0.021416	up	sp|Q8LG95|PP332_ARATH Pentatricopeptide repeat-containing protein At4g21190 OS=Arabidopsis thaliana GN=EMB1417 PE=2 SV=1//2.54214e-126
Cla006140	1557.66	992.046	0.6509	0.0033734	0.029853	up	sp|Q0WMN5|Y3913_ARATH Uncharacterized protein At3g49140 OS=Arabidopsis thaliana GN=At3g49140 PE=1 SV=2//1.11041e-36
Cla006149	80693.9	49405.8	0.70778	0.00034259	0.0046407	up	sp|O49814|BCH2_CAPAN Beta-carotene hydroxylase 2, chloroplastic (Fragment) OS=Capsicum annuum GN=CA2 PE=2 SV=1//2.1834e-127
Cla006159	15574.2	6084.59	1.3559	1.3971e-11	9.3087e-10	up	-//-
Cla006162	842.109	325.046	1.3734	2.4319e-08	9.3908e-07	up	sp|Q94G16|TATB_PEA Sec-independent protein translocase protein TATB, chloroplastic OS=Pisum sativum GN=TATB PE=1 SV=1//4.38499e-61
Cla006166	2748.12	1762.98	0.64043	0.0024421	0.02323	up	-//-
Cla006182	25.4565	2.28108	3.4802	0.0012322	0.013278	up	sp|Q94AU2|SEC22_ARATH 25.3 kDa vesicle transport protein OS=Arabidopsis thaliana GN=SEC22 PE=2 SV=1//7.67025e-42
Cla006192	2145.61	1024.56	1.0664	0.00015507	0.0023867	up	sp|Q9YAK0|Y1940_AERPE Uncharacterized protein APE_1940.1 OS=Aeropyrum pernix (strain ATCC 700893 / DSM 11879 / JCM 9820 / NBRC 100138 / K1) GN=APE_1940.1 PE=3 SV=2//8.18672e-17
Cla006193	597.982	213.56	1.4855	3.5658e-06	8.9623e-05	up	-//-
Cla006196	8485.68	5723.22	0.5682	0.0029067	0.026672	up	sp|Q9XH44|CET1_TOBAC CEN-like protein 1 OS=Nicotiana tabacum GN=CET1 PE=2 SV=1//4.30646e-46
Cla006219	658.804	326.326	1.0135	0.0049497	0.039773	up	sp|Q9LT89|TCP19_ARATH Transcription factor TCP19 OS=Arabidopsis thaliana GN=TCP19 PE=2 SV=1//3.49963e-58
Cla006249	1681.19	854.998	0.97549	8.772e-06	0.00019932	up	sp|Q8GW78|CLP41_ARATH Clp protease-related protein At4g12060, chloroplastic OS=Arabidopsis thaliana GN=At4g12060 PE=1 SV=1//1.87726e-74
Cla006258	353.64	146.861	1.2678	2.4946e-05	0.00049879	up	sp|F4KDA6|LPA2_ARATH Protein LOW PSII ACCUMULATION 2, chloroplastic OS=Arabidopsis thaliana GN=LPA2 PE=1 SV=1//5.54132e-54
Cla006264	68270.5	31090.9	1.1348	2.9042e-05	0.00056741	up	sp|P17407|21KD_DAUCA 21 kDa protein OS=Daucus carota PE=2 SV=1//1.54417e-65
Cla006266	2178.94	96.0768	4.5033	2.225e-15	2.683e-13	up	sp|P17407|21KD_DAUCA 21 kDa protein OS=Daucus carota PE=2 SV=1//3.41452e-46
Cla006276	1116.49	351.497	1.6674	8.8791e-12	6.0808e-10	up	-//-
Cla006293	109.537	35.4889	1.626	0.00029	0.004034	up	-//-
Cla006304	1259.19	582.127	1.1131	1.01e-06	2.8279e-05	up	-//-
Cla006310	100.38	12.07	3.056	1.3207e-08	5.3521e-07	up	sp|Q9C8J6|PLA17_ARATH Phospholipase A1-Igamma3, chloroplastic OS=Arabidopsis thaliana GN=At1g51440 PE=1 SV=1//0
Cla006331	833.064	433.274	0.94315	9.2559e-05	0.0015275	up	sp|O80934|Y2766_ARATH Uncharacterized protein At2g37660, chloroplastic OS=Arabidopsis thaliana GN=At2g37660 PE=2 SV=2//7.4669e-19
Cla006353	845.516	462.973	0.8689	0.0002722	0.0038242	up	-//-
Cla006379	1644.29	114.333	3.8462	1.3841e-23	4.4597e-21	up	sp|F8WKW1|UGT2_GARJA 7-deoxyloganetin glucosyltransferase OS=Gardenia jasminoides GN=UGT85A24 PE=1 SV=1//0
Cla006384	65.5578	14.7714	2.15	0.00027121	0.0038158	up	sp|Q94F62|BAK1_ARATH BRASSINOSTEROID INSENSITIVE 1-associated receptor kinase 1 OS=Arabidopsis thaliana GN=BAK1 PE=1 SV=2//0
Cla006437	596.672	292.671	1.0277	5.5548e-05	0.00098538	up	-//-
Cla006441	31546.4	12936.1	1.2861	8.8749e-11	5.1456e-09	up	-//-
Cla006446	1007.37	458.544	1.1355	0.00045644	0.0058867	up	sp|Q9C942|CSE_ARATH Caffeoylshikimate esterase OS=Arabidopsis thaliana GN=CSE PE=1 SV=1//2.24589e-133
Cla006457	415.23	224.899	0.88463	0.0014358	0.015148	up	-//-
Cla006467	27.3633	0.408263	6.0666	0.0019489	0.019395	up	sp|Q9ZVK1|XTH10_ARATH Probable xyloglucan endotransglucosylase/hydrolase protein 10 OS=Arabidopsis thaliana GN=XTH10 PE=2 SV=1//8.28401e-160
Cla006479	5138.88	1933.93	1.4099	4.9637e-05	0.00089261	up	sp|Q9FME8|OPT4_ARATH Oligopeptide transporter 4 OS=Arabidopsis thaliana GN=OPT4 PE=1 SV=1//0
Cla006483	1412.03	911.239	0.63187	0.0040289	0.034206	up	sp|Q7N3Y5|ZNTB_PHOLL Zinc transport protein ZntB OS=Photorhabdus luminescens subsp. laumondii (strain TT01) GN=zntB PE=3 SV=1//1.50731e-06
Cla006486	1714.18	952.159	0.84824	0.00012165	0.0019376	up	sp|Q9FGF0|PGML1_ARATH Phosphoglycerate mutase-like protein 1 OS=Arabidopsis thaliana GN=At5g64460 PE=2 SV=1//1.86125e-155
Cla006487	151.181	53.5696	1.4968	0.00024691	0.0035244	up	-//-
Cla006492	803.461	343.438	1.2262	5.7367e-07	1.6981e-05	up	-//-
Cla006495	3162.9	1783.41	0.8266	0.001168	0.012695	up	sp|Q6AVK1|COSA_ORYSJ Costars family protein OS=Oryza sativa subsp. japonica GN=Os03g0690000 PE=3 SV=1//3.50188e-38
Cla006503	544.788	342.499	0.6696	0.0060287	0.046523	up	sp|Q9C7A8|PSF2_ARATH DNA replication complex GINS protein PSF2 OS=Arabidopsis thaliana GN=GINS2 PE=2 SV=2//5.9045e-34
Cla006506	590.885	132.458	2.1573	6.101e-15	6.8134e-13	up	sp|P30155|RK27_TOBAC 50S ribosomal protein L27, chloroplastic OS=Nicotiana tabacum GN=RPL27 PE=1 SV=1//2.53537e-84
Cla006510	104.432	41.7085	1.3241	0.003505	0.0307	up	sp|P92942|CLCB_ARATH Chloride channel protein CLC-b OS=Arabidopsis thaliana GN=CLC-B PE=1 SV=1//0
Cla006542	645.256	225.226	1.5185	0.004698	0.038331	up	sp|Q7X9A0|RCA1_LARTR Ribulose bisphosphate carboxylase/oxygenase activase 1, chloroplastic OS=Larrea tridentata GN=RCA1 PE=1 SV=1//0
Cla006544	2731.07	1189.86	1.1987	4.1775e-08	1.558e-06	up	sp|O22160|TL15A_ARATH Thylakoid lumenal 15 kDa protein 1, chloroplastic OS=Arabidopsis thaliana GN=At2g44920 PE=1 SV=2//5.96564e-100
Cla006553	7392.57	4346.71	0.76615	0.00014625	0.002267	up	sp|O04015|P5CS_ACTDE Delta-1-pyrroline-5-carboxylate synthase OS=Actinidia deliciosa PE=2 SV=1//0
Cla006576	39.6869	5.33313	2.8956	0.0043188	0.036055	up	sp|Q9SND9|Y3028_ARATH Uncharacterized acetyltransferase At3g50280 OS=Arabidopsis thaliana GN=At3g50280 PE=3 SV=1//8.68968e-61
Cla006582	2397.29	1191.56	1.0086	2.5898e-06	6.7155e-05	up	sp|Q9FFK3|EGY2_ARATH Probable zinc metalloprotease EGY2, chloroplastic OS=Arabidopsis thaliana GN=EGY2 PE=2 SV=1//0
Cla006645	196.602	19.5704	3.3285	7.6709e-07	2.214e-05	up	sp|Q9M153|GDL61_ARATH GDSL esterase/lipase At4g01130 OS=Arabidopsis thaliana GN=At4g01130 PE=2 SV=1//3.27714e-177
Cla006646	501.33	55.1326	3.1848	5.6011e-14	5.1204e-12	up	sp|O22150|SAU36_ARATH Auxin-responsive protein SAUR36 OS=Arabidopsis thaliana GN=SAUR36 PE=2 SV=1//9.95024e-30
Cla006651	398.797	201.347	0.98598	0.00041973	0.005508	up	sp|Q9SIT1|TMK3_ARATH Receptor-like kinase TMK3 OS=Arabidopsis thaliana GN=TMK3 PE=2 SV=1//0
Cla006685	4142.14	1324.23	1.6452	1.3464e-14	1.4077e-12	up	sp|Q8GZ79|TI201_ARATH Protein TIC 20-I, chloroplastic OS=Arabidopsis thaliana GN=TIC20-I PE=1 SV=1//5.29885e-128
Cla006701	761.104	101.521	2.9063	6.3629e-11	3.8013e-09	up	sp|Q9ZPX9|KIC_ARATH Calcium-binding protein KIC OS=Arabidopsis thaliana GN=KIC PE=1 SV=2//4.87865e-52
Cla006737	3032.72	1918.82	0.66039	0.0012822	0.013787	up	sp|P87248|ATG1_COLLN Serine/threonine-protein kinase ATG1 OS=Colletotrichum lindemuthianum GN=ATG1 PE=3 SV=1//3.10534e-62
Cla006738	5587.04	1644.99	1.764	2.6287e-17	4.2701e-15	up	sp|Q6R0H1|LHY_ARATH Protein LHY OS=Arabidopsis thaliana GN=LHY PE=1 SV=2//3.19553e-49
Cla006739	369.219	100.68	1.8747	5.4842e-10	2.7781e-08	up	sp|P92973|CCA1_ARATH Protein CCA1 OS=Arabidopsis thaliana GN=CCA1 PE=1 SV=1//2.11166e-08
Cla006741	291.041	142.827	1.027	0.00051372	0.0065017	up	sp|P28644|ROC1_SPIOL 28 kDa ribonucleoprotein, chloroplastic OS=Spinacia oleracea PE=1 SV=1//1.15096e-32
Cla006743	1976.89	1136.57	0.79855	0.00043191	0.0056444	up	sp|O24457|ODPA3_ARATH Pyruvate dehydrogenase E1 component subunit alpha-3, chloroplastic OS=Arabidopsis thaliana GN=PDH-E1 ALPHA PE=2 SV=1//0
Cla006757	1428.89	872.579	0.71153	0.0010872	0.011905	up	sp|Q9M3H5|HMA1_ARATH Probable cadmium/zinc-transporting ATPase HMA1, chloroplastic OS=Arabidopsis thaliana GN=HMA1 PE=2 SV=2//5.0685e-67
Cla006761	6760.49	4578.17	0.56236	0.0047724	0.038733	up	sp|Q9FDW1|MYB44_ARATH Transcription factor MYB44 OS=Arabidopsis thaliana GN=MYB44 PE=2 SV=1//1.40329e-87
Cla006786	808.288	136.744	2.5634	8.2524e-13	6.5668e-11	up	sp|O24629|SIGA_ARATH RNA polymerase sigma factor sigA OS=Arabidopsis thaliana GN=SIGA PE=1 SV=1//0
Cla006789	666.199	295.109	1.1747	6.1488e-06	0.00014561	up	sp|Q9LF50|MEX1_ARATH Maltose excess protein 1, chloroplastic OS=Arabidopsis thaliana GN=MEX1 PE=2 SV=2//1.40749e-134
Cla006838	18980.6	7821.65	1.279	3.098e-10	1.6546e-08	up	sp|Q8W4L0|CML49_ARATH Probable calcium-binding protein CML49 OS=Arabidopsis thaliana GN=CML49 PE=2 SV=1//2.66701e-98
Cla006845	29.2628	2.06703	3.8234	0.00034891	0.0047198	up	-//-
Cla006851	20576.9	10093.6	1.0276	0.0063544	0.048466	up	sp|Q9ZSK5|ZOG_PHALU Zeatin O-glucosyltransferase OS=Phaseolus lunatus GN=ZOG1 PE=2 SV=1//3.718e-134
Cla006860	857.681	120.962	2.8259	4.9364e-26	2.2051e-23	up	sp|Q5NDL0|EOGT_RAT EGF domain-specific O-linked N-acetylglucosamine transferase OS=Rattus norvegicus GN=Eogt PE=2 SV=1//7.98384e-09
Cla006895	655.288	265.361	1.3042	2.271e-07	7.3053e-06	up	sp|P48279|YCF39_CYAPA Uncharacterized protein ycf39 OS=Cyanophora paradoxa GN=ycf39 PE=3 SV=1//5.65678e-117
Cla006976	426.602	229.706	0.8931	0.0010076	0.011227	up	sp|O80360|RK3_TOBAC 50S ribosomal protein L3, chloroplastic (Fragment) OS=Nicotiana tabacum GN=RPL3 PE=2 SV=1//1.42096e-117
Cla006978	1021.05	570.352	0.84012	0.00034151	0.0046293	up	sp|O22056|SIGB_ARATH RNA polymerase sigma factor sigB OS=Arabidopsis thaliana GN=SIGB PE=2 SV=2//0
Cla006996	1396.5	773.88	0.85163	0.00010784	0.0017388	up	sp|F4HVY0|CER1_ARATH Protein ECERIFERUM 1 OS=Arabidopsis thaliana GN=CER1 PE=1 SV=1//0
Cla007029	2203.87	79.1449	4.7994	3.0287e-19	6.2009e-17	up	-//-
Cla007054	252.432	75.7875	1.7359	0.00011908	0.001906	up	-//-
Cla007062	462.086	247.689	0.89963	0.00062535	0.0075872	up	sp|Q0JG75|PSB28_ORYSJ Photosystem II reaction center PSB28 protein, chloroplastic OS=Oryza sativa subsp. japonica GN=PSB28 PE=2 SV=2//9.57975e-70
Cla007065	75.5658	18.7782	2.0087	0.00015225	0.0023545	up	-//-
Cla007091	1424.66	598.392	1.2514	4.6269e-08	1.7094e-06	up	-//-
Cla007137	838.078	532.793	0.65351	0.0055627	0.043595	up	sp|Q9LF14|CRS2B_ARATH Chloroplastic group IIB intron splicing facilitator CRS2-B, chloroplastic OS=Arabidopsis thaliana GN=CRS2B PE=2 SV=1//3.41422e-124
Cla007217	1296.67	777.099	0.73864	0.00050667	0.0064207	up	sp|Q9M8R7|P2C33_ARATH Probable protein phosphatase 2C 33 OS=Arabidopsis thaliana GN=PPC6-1 PE=1 SV=1//4.26337e-160
Cla007219	4524.55	2045.78	1.1451	3.069e-08	1.1556e-06	up	-//-
Cla007229	2244.15	1141.03	0.97583	2.6728e-06	6.9123e-05	up	sp|Q9LYN6|Y3565_ARATH Probable inactive receptor-like protein kinase At3g56050 OS=Arabidopsis thaliana GN=At3g56050 PE=2 SV=1//9.66239e-113
Cla007232	332.484	62.0101	2.4227	9.8496e-09	4.1015e-07	up	sp|Q9S7T7|SCC11_ARATH Sister chromatid cohesion 1 protein 1 OS=Arabidopsis thaliana GN=SYN1 PE=2 SV=2//2.13128e-31
Cla007236	17.6678	1.05629	4.064	0.0045279	0.037361	up	sp|Q54ND5|MINP1_DICDI Multiple inositol polyphosphate phosphatase 1 OS=Dictyostelium discoideum GN=mipp1 PE=1 SV=1//1.06733e-42
Cla007271	3552.05	718.657	2.3053	5.2072e-25	1.9682e-22	up	sp|Q9SRK5|LSF2_ARATH Phosphoglucan phosphatase LSF2, chloroplastic OS=Arabidopsis thaliana GN=LSF2 PE=1 SV=1//1.44941e-132
Cla007272	2934.6	1107.15	1.4063	5.0125e-11	3.0502e-09	up	sp|Q42967|DCUP_TOBAC Uroporphyrinogen decarboxylase, chloroplastic OS=Nicotiana tabacum GN=DCUP PE=1 SV=1//0
Cla007274	1101.51	565.824	0.96106	2.8809e-05	0.00056454	up	-//-
Cla007275	1548.03	841.199	0.87991	6.7248e-05	0.0011656	up	sp|Q9X0Y1|P1254_THEMA Phosphorylated carbohydrates phosphatase TM_1254 OS=Thermotoga maritima (strain ATCC 43589 / MSB8 / DSM 3109 / JCM 10099) GN=TM_1254 PE=1 SV=1//4.32652e-06
Cla007280	2671.83	1769.7	0.59432	0.0056625	0.04413	up	sp|O22881|POT2_ARATH Potassium transporter 2 OS=Arabidopsis thaliana GN=POT2 PE=1 SV=2//0
Cla007310	185.738	89.6396	1.0511	0.0036043	0.031429	up	-//-
Cla007311	5196.3	3341.36	0.63705	0.0022687	0.021955	up	sp|Q9ASX5|Y5520_ARATH Uncharacterized aarF domain-containing protein kinase At5g05200, chloroplastic OS=Arabidopsis thaliana GN=At5g05200 PE=2 SV=1//0
Cla007387	4622.4	2048.84	1.1738	0.0040228	0.034169	up	-//-
Cla007388	1615.04	730.88	1.1439	3.1145e-07	9.7476e-06	up	sp|Q9LPZ1|MORF9_ARATH Multiple organellar RNA editing factor 9, chloroplastic OS=Arabidopsis thaliana GN=MORF9 PE=1 SV=1//1.08252e-96
Cla007395	3869.07	2282.63	0.76129	0.00026839	0.0037815	up	sp|O23379|COL11_ARATH Putative zinc finger protein CONSTANS-LIKE 11 OS=Arabidopsis thaliana GN=COL11 PE=3 SV=2//6.4217e-09
Cla007398	20089.2	5355.98	1.9072	6.3709e-20	1.4561e-17	up	sp|O82150|FTSH_TOBAC ATP-dependent zinc metalloprotease FTSH, chloroplastic OS=Nicotiana tabacum GN=FTSH PE=2 SV=2//0
Cla007419	15286	2053.79	2.8959	9.6196e-13	7.6239e-11	up	sp|P42699|PLAS2_ARATH Plastocyanin major isoform, chloroplastic OS=Arabidopsis thaliana GN=DRT112 PE=1 SV=2//2.88372e-78
Cla007447	493.906	238.237	1.0518	0.0010818	0.011859	up	sp|Q9LYG9|MSL10_ARATH Mechanosensitive ion channel protein 10 OS=Arabidopsis thaliana GN=MSL10 PE=1 SV=1//0
Cla007455	1276.82	652.106	0.96938	1.664e-05	0.00035029	up	sp|Q42371|ERECT_ARATH LRR receptor-like serine/threonine-protein kinase ERECTA OS=Arabidopsis thaliana GN=ERECTA PE=1 SV=1//0
Cla007508	52.8342	11.5476	2.1939	0.0044713	0.036973	up	-//-
Cla007544	1304.85	754.867	0.78959	0.0003536	0.0047668	up	sp|Q38822|IAA3_ARATH Auxin-responsive protein IAA3 OS=Arabidopsis thaliana GN=IAA3 PE=1 SV=1//1.70488e-77
Cla007561	28416.9	19109.3	0.57248	0.0059578	0.046157	up	-//-
Cla007564	4764.47	1930.23	1.3035	1.575e-10	8.8699e-09	up	sp|Q570S7|CSLG1_ARATH Cellulose synthase-like protein G1 OS=Arabidopsis thaliana GN=CSLG1 PE=2 SV=1//7.78525e-142
Cla007567	1801.34	1020.03	0.82046	7.6034e-05	0.0012905	up	sp|Q8GWQ2|AHL20_ARATH AT-hook motif nuclear-localized protein 20 OS=Arabidopsis thaliana GN=AHL20 PE=2 SV=1//4.77864e-47
Cla007582	420.188	33.3362	3.6559	0.00089596	0.010191	up	-//-
Cla007595	86.6113	25.8931	1.742	0.000295	0.0040919	up	-//-
Cla007609	6420.69	4196.59	0.61351	0.0035635	0.031129	up	sp|O53732|UFAA1_MYCTU Tuberculostearic acid methyltransferase UfaA1 OS=Mycobacterium tuberculosis (strain ATCC 25618 / H37Rv) GN=ufaA1 PE=1 SV=3//4.68549e-64
Cla007641	829.137	288.516	1.523	5.1318e-10	2.6064e-08	up	-//-
Cla007642	959.835	302.196	1.6673	4.8314e-12	3.4657e-10	up	-//-
Cla007649	1347.03	517.771	1.3794	2.5083e-09	1.1519e-07	up	sp|Q9ZSY9|C74B2_ARATH Linolenate hydroperoxide lyase, chloroplastic OS=Arabidopsis thaliana GN=CYP74B2 PE=1 SV=1//1.37759e-45
Cla007650	6460.1	2714.82	1.2507	2.5977e-09	1.1819e-07	up	sp|B3LF83|Y74B2_ARATH Probable inactive linolenate hydroperoxide lyase OS=Arabidopsis thaliana GN=CYP74B2 PE=2 SV=1//5.01442e-133
Cla007656	4322.1	2673.67	0.69291	0.0004301	0.0056244	up	sp|Q9C519|WRKY6_ARATH WRKY transcription factor 6 OS=Arabidopsis thaliana GN=WRKY6 PE=1 SV=1//5.45129e-106
Cla007669	9569.58	5807.2	0.72061	0.00033949	0.004605	up	sp|Q9LYT3|TT12_ARATH Protein TRANSPARENT TESTA 12 OS=Arabidopsis thaliana GN=TT12 PE=2 SV=1//5.58925e-119
Cla007671	227.483	52.0138	2.1288	1.4909e-08	5.9562e-07	up	sp|Q9LYT3|TT12_ARATH Protein TRANSPARENT TESTA 12 OS=Arabidopsis thaliana GN=TT12 PE=2 SV=1//8.02732e-137
Cla007673	1580.89	587.98	1.4269	1.4313e-09	6.7954e-08	up	sp|O23049|RK6_ARATH 50S ribosomal protein L6, chloroplastic OS=Arabidopsis thaliana GN=RPL6 PE=2 SV=1//3.83753e-111
Cla007692	21.6467	0	Inf	9.5681e-05	0.0015709	up	sp|Q9LRJ9|CRR38_ARATH Cysteine-rich repeat secretory protein 38 OS=Arabidopsis thaliana GN=CRRSP38 PE=2 SV=1//7.91706e-74
Cla007702	342.994	165.573	1.0507	0.00024858	0.0035404	up	sp|Q9C5J4|Y3210_ARATH BTB/POZ domain-containing protein At3g22104 OS=Arabidopsis thaliana GN=At3g22104 PE=2 SV=1//2.63196e-102
Cla007703	161.688	75.9815	1.0895	0.0025863	0.024335	up	sp|P53611|PGTB2_HUMAN Geranylgeranyl transferase type-2 subunit beta OS=Homo sapiens GN=RABGGTB PE=1 SV=2//5.08488e-47
Cla007717	2385.98	786.771	1.6006	2.4876e-13	2.1634e-11	up	sp|Q69S39|UCRIA_ORYSJ Cytochrome b6-f complex iron-sulfur subunit, chloroplastic OS=Oryza sativa subsp. japonica GN=petC PE=1 SV=1//1.23407e-110
Cla007720	2938.71	1432.06	1.0371	6.446e-07	1.8882e-05	up	sp|Q7XAB8|THF1_SOLTU Protein THYLAKOID FORMATION1, chloroplastic OS=Solanum tuberosum GN=THF1 PE=2 SV=1//1.12001e-144
Cla007741	247.608	74.3195	1.7362	1.9907e-05	0.00041056	up	sp|Q9LR64|PB27A_ARATH Photosystem II repair protein PSB27-H1, chloroplastic OS=Arabidopsis thaliana GN=PSB27-1 PE=1 SV=1//5.75445e-68
Cla007748	155.007	38.4036	2.013	2.6899e-06	6.9382e-05	up	sp|Q9SSA7|GLIP5_ARATH GDSL esterase/lipase 5 OS=Arabidopsis thaliana GN=GLIP5 PE=2 SV=2//1.90187e-88
Cla007752	38537.3	14593.9	1.4009	1.8151e-09	8.5146e-08	up	sp|Q00497|SK_SOLLC Shikimate kinase, chloroplastic OS=Solanum lycopersicum GN=SK PE=1 SV=1//6.33558e-91
Cla007762	165.961	32.2745	2.3624	2.8185e-08	1.0715e-06	up	-//-
Cla007763	20319.4	11216.1	0.85729	2.509e-05	0.00050117	up	sp|Q9SQT8|DHQSD_ARATH Bifunctional 3-dehydroquinate dehydratase/shikimate dehydrogenase, chloroplastic OS=Arabidopsis thaliana GN=EMB3004 PE=1 SV=1//0
Cla007796	1855.09	1190.09	0.64041	0.0028145	0.025971	up	sp|P92812|RM02_ORYSJ 60S ribosomal protein L2, mitochondrial OS=Oryza sativa subsp. japonica GN=RPL2 PE=2 SV=2//1.96734e-51
Cla007826	3448.86	1441.83	1.2582	2.8077e-09	1.2716e-07	up	sp|P57108|GSTZ_EUPES Glutathione S-transferase zeta class OS=Euphorbia esula PE=2 SV=1//6.06552e-115
Cla007831	1641.8	1035.76	0.66459	0.0027905	0.025835	up	sp|Q94AQ6|SIR4_ARATH NAD-dependent protein deacylase SRT2 OS=Arabidopsis thaliana GN=SRT2 PE=2 SV=1//2.44261e-153
Cla007833	1629.38	766.466	1.088	0.0018364	0.01851	up	sp|Q9M060|IF62_ARATH Eukaryotic translation initiation factor 6-2 OS=Arabidopsis thaliana GN=EIF6-2 PE=2 SV=1//5.65755e-144
Cla007835	3078.48	1975.19	0.64023	0.0021238	0.020862	up	sp|Q93ZD7|MRS24_ARATH Magnesium transporter MRS2-4 OS=Arabidopsis thaliana GN=MRS2-4 PE=2 SV=1//1.30122e-99
Cla007851	4696.05	2271.85	1.0476	4.9188e-07	1.4715e-05	up	-//-
Cla007861	1960.18	988.251	0.98803	5.0392e-06	0.00012289	up	sp|P19954|PRSP1_SPIOL Ribosome-binding factor PSRP1, chloroplastic OS=Spinacia oleracea GN=PSRP1 PE=1 SV=2//3.91048e-121
Cla007871	477.844	51.382	3.2172	4.2218e-09	1.8731e-07	up	sp|P12354|PSAE_SPIOL Photosystem I reaction center subunit IV, chloroplastic OS=Spinacia oleracea GN=PSAE-1 PE=1 SV=1//7.52036e-32
Cla007918	1438.65	914.059	0.65436	0.002675	0.025024	up	sp|Q6AXT7|RBM42_RAT RNA-binding protein 42 OS=Rattus norvegicus GN=Rbm42 PE=1 SV=1//5.15527e-50
Cla007940	3617.38	936.83	1.9491	2.5454e-08	9.7714e-07	up	sp|Q39654|PSAL_CUCSA Photosystem I reaction center subunit XI, chloroplastic OS=Cucumis sativus GN=PSAL PE=2 SV=1//9.17528e-120
Cla007982	1247.43	653.615	0.93244	0.0010146	0.011285	up	sp|Q9SX27|PAN_ARATH Transcription factor PERIANTHIA OS=Arabidopsis thaliana GN=PAN PE=1 SV=1//2.62086e-155
Cla007987	8413.51	4300.3	0.96827	1.5665e-06	4.2822e-05	up	sp|Q54I39|IST1L_DICDI IST1-like protein OS=Dictyostelium discoideum GN=DDB_G0289029 PE=3 SV=1//5.67053e-09
Cla007995	22841.2	7017.07	1.7027	2.6262e-10	1.4181e-08	up	sp|Q9SX20|PTR18_ARATH Protein NRT1/ PTR FAMILY 3.1 OS=Arabidopsis thaliana GN=NPF3.1 PE=2 SV=1//0
Cla008000	4435.43	1959.91	1.1783	0.00017768	0.0026864	up	sp|Q9S7Y7|XYL1_ARATH Alpha-xylosidase 1 OS=Arabidopsis thaliana GN=XYL1 PE=1 SV=1//0
Cla008010	2403.96	1647.67	0.54499	0.0061335	0.047147	up	sp|P0DM58|DI3L2_ARATH DIS3-like exonuclease 2 OS=Arabidopsis thaliana GN=SOV PE=1 SV=1//0
Cla008012	152.637	65.6554	1.2171	0.0011561	0.012582	up	sp|Q56YP2|PI5K1_ARATH Phosphatidylinositol 4-phosphate 5-kinase 1 OS=Arabidopsis thaliana GN=PIP5K1 PE=1 SV=1//3.76786e-21
Cla008047	537.653	110.946	2.2768	7.5324e-11	4.4459e-09	up	sp|O48529|STR9_ARATH Rhodanese-like domain-containing protein 9, chloroplastic OS=Arabidopsis thaliana GN=STR9 PE=2 SV=1//1.0954e-32
Cla008071	1125.46	594.145	0.92163	6.3076e-05	0.0011035	up	sp|F4I0K2|SCKL2_ARATH Fructokinase-like 2, chloroplastic OS=Arabidopsis thaliana GN=FLN2 PE=1 SV=2//0
Cla008104	2216.07	1485.85	0.57672	0.0034996	0.03068	up	sp|Q8S8P5|WRK33_ARATH Probable WRKY transcription factor 33 OS=Arabidopsis thaliana GN=WRKY33 PE=1 SV=2//1.36101e-112
Cla008127	494.238	263.631	0.90668	0.00052603	0.0066203	up	sp|O64733|U87A2_ARATH UDP-glycosyltransferase 87A2 OS=Arabidopsis thaliana GN=UGT87A2 PE=1 SV=1//4.02869e-157
Cla008131	582.885	290.145	1.0064	7.9298e-05	0.001339	up	sp|Q944L7|Y1480_ARATH Uncharacterized protein At1g18480 OS=Arabidopsis thaliana GN=At1g18480 PE=2 SV=1//2.61336e-52
Cla008164	26.8624	2.38582	3.493	0.00076762	0.0090051	up	sp|B0X1Q4|RUMI_CULQU O-glucosyltransferase rumi homolog OS=Culex quinquefasciatus GN=CPIJ013394 PE=3 SV=1//1.86196e-21
Cla008177	2161.26	851.15	1.3444	1.1958e-09	5.7046e-08	up	sp|O82392|THIC_ARATH Phosphomethylpyrimidine synthase, chloroplastic OS=Arabidopsis thaliana GN=THIC PE=1 SV=1//0
Cla008180	2666.73	996.663	1.4199	1.5438e-10	8.7195e-09	up	-//-
Cla008185	3739.73	2168.87	0.78599	0.00085626	0.009819	up	-//-
Cla008207	295.747	92.3832	1.6787	1.6925e-05	0.00035524	up	-//-
Cla008254	3867.58	2354.15	0.71622	0.00051795	0.0065468	up	sp|Q9FY06|PPF1_PEA Inner membrane protein PPF-1, chloroplastic OS=Pisum sativum GN=PPF-1 PE=2 SV=2//0
Cla008258	93.0607	23.5365	1.9833	0.0055511	0.043538	up	-//-
Cla008261	31382.7	12704.5	1.3046	4.6801e-11	2.8568e-09	up	sp|P35100|CLPC_PEA Chaperone protein ClpC, chloroplastic OS=Pisum sativum PE=2 SV=1//0
Cla008264	2275.29	541.574	2.0708	1.6305e-19	3.5217e-17	up	sp|Q9LRQ8|PMAT2_ARATH Phenolic glucoside malonyltransferase 2 OS=Arabidopsis thaliana GN=PMAT2 PE=1 SV=1//1.91544e-92
Cla008267	197.85	0.303521	9.3484	9.6866e-12	6.6019e-10	up	-//-
Cla008275	194.686	45.1583	2.1081	7.9883e-05	0.0013454	up	-//-
Cla008278	36.438	7.61421	2.2587	0.0032239	0.028868	up	sp|Q9LK95|MYB21_ARATH Transcription factor MYB21 OS=Arabidopsis thaliana GN=MYB21 PE=1 SV=1//1.38605e-50
Cla008289	27028.4	17857.4	0.59796	0.0034765	0.030597	up	sp|Q9FVI1|ADF2_PETHY Actin-depolymerizing factor 2 OS=Petunia hybrida GN=ADF2 PE=2 SV=1//8.33615e-54
Cla008305	210.282	110.809	0.92425	0.0047425	0.038566	up	-//-
Cla008321	183.268	82.1217	1.1581	0.0009869	0.011028	up	-//-
Cla008338	196.282	18.2984	3.4231	1.4758e-12	1.1375e-10	up	-//-
Cla008339	9367.33	5935.87	0.65818	0.00086221	0.0098643	up	sp|Q02283|HAT5_ARATH Homeobox-leucine zipper protein HAT5 OS=Arabidopsis thaliana GN=HAT5 PE=1 SV=1//1.87046e-42
Cla008340	4002.74	1040.15	1.9442	1.4193e-19	3.0995e-17	up	-//-
Cla008341	186.743	58.7088	1.6694	7.8597e-06	0.00018221	up	-//-
Cla008375	1771.3	1134.82	0.64235	0.0023269	0.022379	up	sp|Q9FTA0|GEML4_ARATH GEM-like protein 4 OS=Arabidopsis thaliana GN=At5g08350 PE=2 SV=1//2.49928e-61
Cla008399	146.592	41.2057	1.8309	1.0811e-05	0.00023956	up	sp|Q9LZD3|E70A1_ARATH Exocyst complex component EXO70A1 OS=Arabidopsis thaliana GN=EXO70A1 PE=1 SV=1//0
Cla008406	638.668	388.279	0.71797	0.0026835	0.025063	up	-//-
Cla008425	1548.1	840.9	0.8805	6.6157e-05	0.0011497	up	sp|Q941D6|HDA14_ARATH Histone deacetylase 14 OS=Arabidopsis thaliana GN=HDA14 PE=2 SV=1//0
Cla008426	16462.6	9797.11	0.74876	0.00017097	0.0025989	up	sp|Q84JL2|ODBA2_ARATH 2-oxoisovalerate dehydrogenase subunit alpha 2, mitochondrial OS=Arabidopsis thaliana GN=At5g09300 PE=1 SV=1//0
Cla008429	1611.72	185.534	3.1188	4.6681e-36	3.823e-33	up	sp|P49107|PSAN_ARATH Photosystem I reaction center subunit N, chloroplastic OS=Arabidopsis thaliana GN=PSAN PE=1 SV=2//6.49169e-73
Cla008430	477.435	71.241	2.7445	1.0162e-18	1.9776e-16	up	sp|Q9S829|NDHO_ARATH NAD(P)H-quinone oxidoreductase subunit O, chloroplastic OS=Arabidopsis thaliana GN=ndhO PE=2 SV=1//1.24113e-49
Cla008446	1726.11	1100.32	0.6496	0.0034391	0.030298	up	sp|Q2JS42|PYRH_SYNJA Uridylate kinase OS=Synechococcus sp. (strain JA-3-3Ab) GN=pyrH PE=3 SV=1//7.90723e-99
Cla008461	148.161	56.2765	1.3966	0.0032557	0.02906	up	sp|Q9FGG3|WTR45_ARATH WAT1-related protein At5g64700 OS=Arabidopsis thaliana GN=At5g64700 PE=2 SV=1//3.24781e-44
Cla008478	1277.44	678.118	0.91364	7.0803e-05	0.0012175	up	sp|Q9SRE4|UGAL2_ARATH UDP-galactose transporter 2 OS=Arabidopsis thaliana GN=UDP-GALT2 PE=2 SV=1//1.62831e-90
Cla008480	95.8766	15.4513	2.6334	0.00085019	0.0097608	up	sp|Q9SVB7|WRK13_ARATH Probable WRKY transcription factor 13 OS=Arabidopsis thaliana GN=WRKY13 PE=2 SV=1//1.33586e-21
Cla008495	5701.76	2902.08	0.97432	9.122e-05	0.0015092	up	sp|Q9FVS9|C96AF_ARATH Alkane hydroxylase MAH1 OS=Arabidopsis thaliana GN=CYP96A15 PE=2 SV=1//7.51867e-157
Cla008499	7680.22	4623.96	0.73202	0.00023936	0.0034357	up	sp|Q9LV93|AB5F_ARATH ABC transporter F family member 5 OS=Arabidopsis thaliana GN=ABCF5 PE=2 SV=1//0
Cla008508	428.465	254.748	0.7501	0.0054633	0.043039	up	sp|O64823|MCU2_ARATH Calcium uniporter protein 2, mitochondrial OS=Arabidopsis thaliana GN=At2g23790 PE=2 SV=1//1.36382e-86
Cla008520	10002.6	3098.2	1.6909	0.00037964	0.0050623	up	sp|O24370|LOX21_SOLTU Linoleate 13S-lipoxygenase 2-1, chloroplastic OS=Solanum tuberosum GN=LOX2.1 PE=1 SV=1//0
Cla008530	103.83	46.4833	1.1594	0.0050756	0.04057	up	sp|Q00874|DR100_ARATH DNA-damage-repair/toleration protein DRT100 OS=Arabidopsis thaliana GN=DRT100 PE=2 SV=2//6.01449e-143
Cla008542	1436.1	917.071	0.64705	0.0023107	0.022296	up	sp|Q3M929|DER_ANAVT GTPase Der OS=Anabaena variabilis (strain ATCC 29413 / PCC 7937) GN=der PE=3 SV=1//2.56986e-146
Cla008554	3110.73	262.788	3.5653	1.4681e-24	5.1529e-22	up	sp|B3EWI4|PST2_PETHY Photosystem II 5 kDa protein, chloroplastic OS=Petunia hybrida PE=1 SV=1//3.27904e-12
Cla008561	5070.23	3165.16	0.67977	0.0012062	0.013012	up	sp|Q9S9N9|CCR1_ARATH Cinnamoyl-CoA reductase 1 OS=Arabidopsis thaliana GN=CCR1 PE=1 SV=1//1.10898e-91
Cla008595	127.984	58.4977	1.1295	0.006147	0.047177	up	sp|P80728|MAVI_CUCPE Mavicyanin OS=Cucurbita pepo PE=1 SV=1//3.31584e-06
Cla008610	2070.67	1120.45	0.88602	0.00011811	0.001892	up	sp|Q9XFB0|YAB2_ARATH Putative axial regulator YABBY 2 OS=Arabidopsis thaliana GN=YAB2 PE=2 SV=1//3.39911e-55
Cla008625	3507.65	1120.04	1.647	3.5952e-14	3.4809e-12	up	sp|Q96KR6|F210B_HUMAN Protein FAM210B OS=Homo sapiens GN=FAM210B PE=1 SV=2//5.8128e-06
Cla008659	462.191	278.921	0.72863	0.0048028	0.038895	up	sp|Q39183|D6KL2_ARATH Serine/threonine-protein kinase D6PKL2 OS=Arabidopsis thaliana GN=D6PKL2 PE=1 SV=1//1.09751e-35
Cla008661	1834.54	1017.15	0.85089	3.9891e-05	0.00074531	up	sp|Q55535|Y328_SYNY3 Putative low molecular weight protein-tyrosine-phosphatase slr0328 OS=Synechocystis sp. (strain PCC 6803 / Kazusa) GN=slr0328 PE=3 SV=1//1.03322e-38
Cla008670	1381.24	648.104	1.0917	6.6268e-05	0.0011506	up	-//-
Cla008672	4001.49	2254.45	0.82776	5.8541e-05	0.0010301	up	sp|Q8LPR8|TI100_ARATH Protein TIC 100 OS=Arabidopsis thaliana GN=TIC100 PE=1 SV=1//0
Cla008673	34292.9	17905.2	0.93753	0.0010411	0.011497	up	sp|Q56XJ7|Y4276_ARATH Uncharacterized protein At4g22758 OS=Arabidopsis thaliana GN=At4g22758 PE=2 SV=1//3.87485e-12
Cla008677	54.2601	11.0135	2.3006	0.00077583	0.0090822	up	sp|Q9FNI7|CSLA2_ARATH Glucomannan 4-beta-mannosyltransferase 2 OS=Arabidopsis thaliana GN=CSLA2 PE=2 SV=1//0
Cla008698	11747.1	3952.9	1.5713	6.4871e-14	5.8757e-12	up	sp|P11964|SODCP_PEA Superoxide dismutase [Cu-Zn], chloroplastic OS=Pisum sativum GN=SODCP PE=2 SV=1//2.49804e-87
Cla008705	1471.28	959.981	0.616	0.0041438	0.034956	up	sp|Q9ZUV3|IRX7_ARATH Probable glucuronoxylan glucuronosyltransferase IRX7 OS=Arabidopsis thaliana GN=IRX7 PE=2 SV=1//0
Cla008719	900.345	522.365	0.78542	0.00098086	0.010985	up	sp|Q9FJH9|LPAH1_ARATH P-loop NTPase domain-containing protein LPA1 homolog 1 OS=Arabidopsis thaliana GN=At5g60760 PE=2 SV=1//1.26037e-69
Cla008724	3249.32	211.996	3.938	7.4889e-48	1.3381e-44	up	sp|P84527|KIWEL_ACTDE Kiwellin OS=Actinidia deliciosa PE=1 SV=1//2.67974e-83
Cla008761	1422.4	644.817	1.1414	0.0055126	0.043305	up	sp|O81445|CNBL1_ARATH Calcineurin B-like protein 1 OS=Arabidopsis thaliana GN=CBL1 PE=1 SV=3//6.31789e-130
Cla008763	4061.56	2201.98	0.88324	3.6617e-05	0.00069537	up	sp|Q9SLG9|PI5K5_ARATH Phosphatidylinositol 4-phosphate 5-kinase 5 OS=Arabidopsis thaliana GN=PIP5K5 PE=2 SV=1//2.08425e-06
Cla008766	1509.6	888.418	0.76485	0.000475	0.0060862	up	sp|O23553|BAM3_ARATH Beta-amylase 3, chloroplastic OS=Arabidopsis thaliana GN=BAM3 PE=1 SV=3//0
Cla008767	989.248	249.819	1.9854	1.1444e-15	1.4326e-13	up	sp|Q8N6R0|MET13_HUMAN Methyltransferase-like protein 13 OS=Homo sapiens GN=METTL13 PE=1 SV=1//5.40278e-13
Cla008768	2841.02	1910.64	0.57235	0.0060608	0.046715	up	sp|Q503V9|ENDUB_DANRE Poly(U)-specific endoribonuclease-B OS=Danio rerio GN=endoub PE=2 SV=1//2.4035e-59
Cla008772	6280.59	3847.3	0.70705	0.00033389	0.0045384	up	sp|B8BDV1|LONP2_ORYSI Lon protease homolog 2, peroxisomal OS=Oryza sativa subsp. indica GN=LON1 PE=2 SV=1//0
Cla008781	1662.63	921.625	0.85121	9.1816e-05	0.0015165	up	sp|Q42581|KPRS1_ARATH Ribose-phosphate pyrophosphokinase 1, chloroplastic OS=Arabidopsis thaliana GN=PRS1 PE=2 SV=2//0
Cla008782	2668.26	1424.52	0.90542	2.536e-05	0.00050502	up	-//-
Cla008788	1032.99	500.799	1.0445	4.8058e-06	0.00011778	up	sp|Q9LS25|PP420_ARATH Pentatricopeptide repeat-containing protein At5g46580, chloroplastic OS=Arabidopsis thaliana GN=At5g46580 PE=2 SV=1//0
Cla008794	6476.01	1801.63	1.8458	2.1199e-18	3.9682e-16	up	-//-
Cla008801	262.032	109.502	1.2588	4.4702e-05	0.00082113	up	sp|Q93XM7|MCAT_ARATH Mitochondrial carnitine/acylcarnitine carrier-like protein OS=Arabidopsis thaliana GN=BOU PE=2 SV=1//4.40162e-167
Cla008819	661.193	412.273	0.68147	0.0040431	0.034282	up	sp|P19684|ROC5_NICSY 33 kDa ribonucleoprotein, chloroplastic OS=Nicotiana sylvestris PE=1 SV=1//2.7996e-06
Cla008831	2649.01	1086.77	1.2854	7.1909e-09	3.0265e-07	up	sp|Q94KU5|PAP3_BRACM Plastid lipid-associated protein 3, chloroplastic OS=Brassica campestris GN=PAP3 PE=2 SV=1//4.13624e-97
Cla008834	173.098	74.1833	1.2224	0.00052042	0.0065696	up	sp|O82290|SKL2_ARATH Probable inactive shikimate kinase like 2, chloroplastic OS=Arabidopsis thaliana GN=SKL2 PE=2 SV=2//3.0338e-153
Cla008859	1004.62	616.281	0.70499	0.0015755	0.016384	up	sp|O49668|PAM68_ARATH Protein PAM68, chloroplastic OS=Arabidopsis thaliana GN=PAM68 PE=1 SV=1//5.9247e-44
Cla008865	117.217	11.0955	3.4011	2.3493e-10	1.2827e-08	up	-//-
Cla008866	3213.12	1517.07	1.0827	5.1969e-07	1.543e-05	up	sp|Q94B60|CLPP4_ARATH ATP-dependent Clp protease proteolytic subunit 4, chloroplastic OS=Arabidopsis thaliana GN=CLPP4 PE=1 SV=1//3.50239e-134
Cla008893	18523.9	12688.1	0.54591	0.0051797	0.041145	up	sp|Q8BUV8|GP107_MOUSE Protein GPR107 OS=Mus musculus GN=Gpr107 PE=2 SV=2//1.95449e-80
Cla008894	1705.33	1003.57	0.76492	0.00047242	0.006061	up	sp|Q1KZG4|FHIT_BOVIN Bis(5&apos;-adenosyl)-triphosphatase OS=Bos taurus GN=FHIT PE=2 SV=1//3.48097e-41
Cla008898	4643.6	1006.96	2.2052	4.9797e-07	1.4875e-05	up	sp|P10933|FENR1_PEA Ferredoxin--NADP reductase, leaf isozyme, chloroplastic OS=Pisum sativum GN=PETH PE=1 SV=1//0
Cla008901	13338.6	6525.02	1.0316	1.5337e-05	0.00032553	up	sp|P83332|TLP1_PRUPE Thaumatin-like protein 1 OS=Prunus persica PE=2 SV=1//6.99328e-77
Cla008908	2882.56	1707.88	0.75514	0.00055923	0.0069217	up	sp|O24030|PSA7_SOLLC Proteasome subunit alpha type-7 OS=Solanum lycopersicum GN=PAD1 PE=2 SV=1//2.71256e-151
Cla008927	4231.04	2153.75	0.97416	1.5947e-06	4.3412e-05	up	sp|Q93VH2|BBD2_ARATH Bifunctional nuclease 2 OS=Arabidopsis thaliana GN=BBD2 PE=2 SV=1//3.68651e-33
Cla008930	61449.1	32442.5	0.9215	1.9071e-06	5.1069e-05	up	sp|Q7JUR6|GDAP2_DROME Protein GDAP2 homolog OS=Drosophila melanogaster GN=CG18812 PE=2 SV=1//8.19305e-09
Cla008944	7288.5	4778.1	0.60919	0.0013079	0.014032	up	sp|P40619|HMGL_IPONI HMG1/2-like protein OS=Ipomoea nil PE=2 SV=1//2.71363e-18
Cla008965	418.665	206.392	1.0204	0.00027999	0.0039224	up	sp|Q7XPJ0|KCBP_ORYSJ Kinesin-like calmodulin-binding protein homolog OS=Oryza sativa subsp. japonica GN=Os04g0666900 PE=2 SV=1//0
Cla008972	1060.62	302.201	1.8113	8.5119e-14	7.6393e-12	up	sp|B3LF48|EHD2_ARATH EH domain-containing protein 2 OS=Arabidopsis thaliana GN=EHD2 PE=1 SV=1//0
Cla009017	10737.9	7355.52	0.54581	0.0049074	0.039499	up	sp|Q41916|CYT5_ARATH Cysteine proteinase inhibitor 5 OS=Arabidopsis thaliana GN=CYS5 PE=2 SV=2//2.08216e-29
Cla009086	1028.35	646.743	0.66907	0.0031193	0.028124	up	sp|Q6NQ83|PP247_ARATH Pentatricopeptide repeat-containing protein At3g22470, mitochondrial OS=Arabidopsis thaliana GN=At3g22470 PE=2 SV=1//5.02926e-127
Cla009102	1436.57	814.532	0.81859	0.00028816	0.0040141	up	sp|Q8GT66|TIC40_PEA Protein TIC 40, chloroplastic OS=Pisum sativum GN=TIC40 PE=1 SV=1//8.59511e-20
Cla009103	273.437	135.246	1.0156	0.00062838	0.0076193	up	sp|Q2V4B2|PQL3_ARATH PsbQ-like protein 3, chloroplastic OS=Arabidopsis thaliana GN=PQL3 PE=2 SV=1//1.48368e-26
Cla009122	7801.99	4941.68	0.65884	0.0020217	0.020018	up	sp|P49293|PSY_CUCME Phytoene synthase, chloroplastic OS=Cucumis melo GN=PSY PE=2 SV=1//0
Cla009137	796.551	108.518	2.8758	1.3645e-11	9.1225e-10	up	sp|Q07346|DCE_PETHY Glutamate decarboxylase OS=Petunia hybrida GN=GAD PE=1 SV=1//2.1066e-59
Cla009138	6551.96	787.744	3.0561	7.3347e-08	2.579e-06	up	sp|Q42521|DCE1_ARATH Glutamate decarboxylase 1 OS=Arabidopsis thaliana GN=GAD1 PE=1 SV=2//0
Cla009181	13135.3	2806.56	2.2266	5.8692e-27	2.7466e-24	up	sp|P46486|PSAF_FLATR Photosystem I reaction center subunit III, chloroplastic OS=Flaveria trinervia GN=PSAF PE=2 SV=1//1.07569e-88
Cla009188	758.484	366.872	1.0478	1.3531e-05	0.00029067	up	sp|Q6PGS5|TM56B_XENLA Transmembrane protein 56-B OS=Xenopus laevis GN=tmem56-b PE=2 SV=1//3.79625e-11
Cla009194	586.211	352.77	0.73269	0.0056705	0.044159	up	-//-
Cla009238	146.413	16.0541	3.189	3.7084e-12	2.7096e-10	up	-//-
Cla009289	1337.22	601.825	1.1518	9.1806e-06	0.00020765	up	sp|Q8L9T5|ATL2_ARATH RING-H2 finger protein ATL2 OS=Arabidopsis thaliana GN=ATL2 PE=2 SV=2//1.27436e-31
Cla009327	2774	1342.38	1.0472	1.5284e-06	4.184e-05	up	-//-
Cla009333	5361.37	2609.18	1.039	1.4232e-06	3.9177e-05	up	sp|Q10LG8|TLP6_ORYSJ Tubby-like F-box protein 6 OS=Oryza sativa subsp. japonica GN=TULP6 PE=2 SV=1//0
Cla009335	9983.13	4842.58	1.0437	3.5773e-07	1.109e-05	up	sp|P93092|ACP1_CASGL Acyl carrier protein 1, chloroplastic OS=Casuarina glauca GN=ACP1 PE=2 SV=1//2.02896e-36
Cla009346	6725.04	1928.12	1.8023	5.9917e-18	1.0515e-15	up	sp|O78328|DXS_CAPAN Probable 1-deoxy-D-xylulose-5-phosphate synthase, chloroplastic OS=Capsicum annuum GN=TKT2 PE=2 SV=1//3.92586e-64
Cla009347	15907.7	5135.53	1.6311	1.0191e-15	1.284e-13	up	sp|O78328|DXS_CAPAN Probable 1-deoxy-D-xylulose-5-phosphate synthase, chloroplastic OS=Capsicum annuum GN=TKT2 PE=2 SV=1//0
Cla009348	8613.97	2801.53	1.6205	3.9518e-15	4.5423e-13	up	sp|O78328|DXS_CAPAN Probable 1-deoxy-D-xylulose-5-phosphate synthase, chloroplastic OS=Capsicum annuum GN=TKT2 PE=2 SV=1//1.11388e-92
Cla009360	499.727	300.079	0.7358	0.0046078	0.037841	up	sp|Q8W0Z6|AP5M_ARATH AP-5 complex subunit mu OS=Arabidopsis thaliana GN=AP5M PE=2 SV=1//0
Cla009418	1002.58	388.779	1.3667	6.581e-08	2.3433e-06	up	-//-
Cla009452	396.15	138.1	1.5203	2.028e-07	6.6212e-06	up	-//-
Cla009478	2728.73	1428.4	0.93383	0.0003822	0.0050895	up	-//-
Cla009541	731.03	378.342	0.95024	0.00011941	0.0019086	up	sp|O82251|TI202_ARATH Protein TIC 20-II, chloroplastic OS=Arabidopsis thaliana GN=TIC20-II PE=2 SV=1//7.64957e-72
Cla009543	93.821	19.901	2.2371	1.6049e-05	0.00033956	up	sp|P0DKC4|PGP1B_ARATH Phosphoglycolate phosphatase 1B, chloroplastic OS=Arabidopsis thaliana GN=PGLP1B PE=1 SV=1//0
Cla009610	1218.48	796.583	0.61319	0.0055792	0.043672	up	sp|Q5ZM74|RN141_CHICK RING finger protein 141 OS=Gallus gallus GN=RNF141 PE=2 SV=1//1.38313e-08
Cla009622	2922.4	1903.08	0.61882	0.002115	0.020806	up	sp|Q2MHE4|HT1_ARATH Serine/threonine-protein kinase HT1 OS=Arabidopsis thaliana GN=HT1 PE=1 SV=1//9.25972e-111
Cla009625	3578.88	1712.26	1.0636	3.8416e-07	1.1854e-05	up	sp|P93014|RR5_ARATH 30S ribosomal protein S5, chloroplastic OS=Arabidopsis thaliana GN=rps5 PE=2 SV=1//4.69942e-79
Cla009644	1268.7	456.292	1.4753	8.1861e-10	4.0528e-08	up	sp|P21727|TPT_PEA Triose phosphate/phosphate translocator, chloroplastic OS=Pisum sativum PE=1 SV=1//0
Cla009667	1954.74	1243.17	0.65295	0.0045639	0.037564	up	sp|Q9SLC3|ATL41_ARATH E3 ubiquitin-protein ligase ATL41 OS=Arabidopsis thaliana GN=ATL41 PE=1 SV=1//1.42431e-18
Cla009670	3879.32	1068.04	1.8608	2.6652e-18	4.8059e-16	up	sp|P93162|CHLI_SOYBN Magnesium-chelatase subunit ChlI, chloroplastic OS=Glycine max GN=CHLI PE=2 SV=1//0
Cla009686	1887.42	747.214	1.3368	9.4535e-10	4.6221e-08	up	sp|P82244|RK34_SPIOL 50S ribosomal protein L34, chloroplastic OS=Spinacia oleracea GN=RPL34 PE=1 SV=1//1.64878e-30
Cla009695	414.553	241.198	0.78134	0.0056076	0.043843	up	-//-
Cla009729	5984.66	3618.56	0.72585	0.00024972	0.0035541	up	sp|Q9LS28|GTE12_ARATH Transcription factor GTE12 OS=Arabidopsis thaliana GN=GTE12 PE=2 SV=2//1.79396e-38
Cla009732	76.4841	17.6365	2.1166	0.00020422	0.0030181	up	sp|Q39224|SRG1_ARATH Protein SRG1 OS=Arabidopsis thaliana GN=SRG1 PE=2 SV=1//1.43647e-138
Cla009742	23011	13432	0.77665	0.00041732	0.0054832	up	sp|Q54GB2|CTSL2_DICDI CTD small phosphatase-like protein 2 OS=Dictyostelium discoideum GN=ctdspl2 PE=3 SV=1//4.66566e-42
Cla009752	3235.36	84.1333	5.2651	2.9395e-72	1.4444e-68	up	sp|P09756|CB23_SOYBN Chlorophyll a-b binding protein 3, chloroplastic OS=Glycine max GN=CAB3 PE=3 SV=1//0
Cla009753	244.208	23.2322	3.3939	1.0928e-12	8.5918e-11	up	sp|P09756|CB23_SOYBN Chlorophyll a-b binding protein 3, chloroplastic OS=Glycine max GN=CAB3 PE=3 SV=1//0
Cla009755	2921.83	1870.41	0.64351	0.0016081	0.016635	up	sp|Q9ASX9|BH144_ARATH Transcription factor bHLH144 OS=Arabidopsis thaliana GN=BHLH144 PE=1 SV=1//1.83804e-25
Cla009760	757.702	338.852	1.161	0.0065452	0.049422	up	-//-
Cla009761	1574.12	175.419	3.1657	6.7385e-20	1.5224e-17	up	sp|Q1XDB4|YCF23_PYRYE Uncharacterized protein ycf23 OS=Pyropia yezoensis GN=ycf23 PE=3 SV=1//2.64395e-54
Cla009782	19879.7	7408.66	1.424	3.5667e-12	2.6256e-10	up	sp|Q9LRR9|GLO1_ARATH Peroxisomal (S)-2-hydroxy-acid oxidase GLO1 OS=Arabidopsis thaliana GN=GLO1 PE=1 SV=1//0
Cla009799	8379.42	4899.93	0.77409	0.0015319	0.016024	up	-//-
Cla009801	4423.01	2473.16	0.83867	3.9111e-05	0.00073282	up	sp|F4IHY7|PTA12_ARATH Protein PLASTID TRANSCRIPTIONALLY ACTIVE 12 OS=Arabidopsis thaliana GN=PTAC12 PE=1 SV=1//1.5382e-176
Cla009803	4015.99	2715.33	0.56462	0.0063316	0.048348	up	sp|Q9C8G5|CSCLD_ARATH CSC1-like protein ERD4 OS=Arabidopsis thaliana GN=ERD4 PE=2 SV=1//0
Cla009805	60.3209	14.1537	2.0915	0.00069109	0.0082075	up	sp|Q9FKZ3|LBD36_ARATH LOB domain-containing protein 36 OS=Arabidopsis thaliana GN=LBD36 PE=2 SV=1//7.48553e-41
Cla009814	2062.85	244.404	3.0773	6.9102e-22	1.8354e-19	up	sp|Q9SUI5|PSAK_ARATH Photosystem I reaction center subunit psaK, chloroplastic OS=Arabidopsis thaliana GN=PSAK PE=2 SV=2//3.22311e-52
Cla009830	382.673	187.222	1.0314	0.00023869	0.0034294	up	sp|Q8VYJ1|MENE_ARATH 2-succinylbenzoate--CoA ligase, chloroplastic/peroxisomal OS=Arabidopsis thaliana GN=AAE14 PE=1 SV=1//1.01635e-100
Cla009846	1590.01	909.446	0.80598	0.00021941	0.0032016	up	sp|Q9SVG4|RETOL_ARATH Reticuline oxidase-like protein OS=Arabidopsis thaliana GN=At4g20830 PE=1 SV=2//0
Cla009866	1263.01	641.448	0.97746	2.6079e-05	0.00051672	up	sp|Q94K71|GPPL2_ARATH Haloacid dehalogenase-like hydrolase domain-containing protein At3g48420 OS=Arabidopsis thaliana GN=At3g48420 PE=1 SV=1//1.22832e-15
Cla009872	288.422	131.105	1.1375	0.00012841	0.0020223	up	-//-
Cla009873	1872.74	1236.94	0.59838	0.0029793	0.027173	up	sp|Q9S7J8|HMA7_ARATH Copper-transporting ATPase RAN1 OS=Arabidopsis thaliana GN=RAN1 PE=1 SV=1//0
Cla009919	964.667	298.336	1.6931	9.7072e-12	6.6019e-10	up	-//-
Cla009936	3745.07	1661.02	1.1729	2.9339e-08	1.109e-06	up	sp|O34355|YTCJ_BACSU Putative amidohydrolase YtcJ OS=Bacillus subtilis (strain 168) GN=ytcJ PE=4 SV=1//2.38324e-54
Cla009996	1844.62	1098.98	0.74716	0.0003494	0.0047232	up	sp|P09886|HS21C_PEA Small heat shock protein, chloroplastic OS=Pisum sativum GN=HSP21 PE=2 SV=1//3.09696e-36
Cla010005	1090.72	91.1739	3.5805	1.1522e-20	2.7959e-18	up	sp|P80470|PSBY_SPIOL Photosystem II core complex proteins psbY, chloroplastic OS=Spinacia oleracea GN=PSBY PE=1 SV=2//1.80136e-27
Cla010019	65.6587	1.16103	5.8215	2.4703e-11	1.5815e-09	up	sp|Q9LIP6|C71BV_ARATH Cytochrome P450 71B34 OS=Arabidopsis thaliana GN=CYP71B34 PE=2 SV=1//7.81392e-160
Cla010030	1972.68	1246.28	0.66253	0.0012631	0.013588	up	sp|Q9C5S1|MKP1_ARATH Protein-tyrosine-phosphatase MKP1 OS=Arabidopsis thaliana GN=MKP1 PE=1 SV=1//1.14309e-08
Cla010048	5479.6	2201.16	1.3158	3.8862e-10	2.0261e-08	up	-//-
Cla010051	9155.81	5703.05	0.68295	0.0009657	0.010834	up	sp|Q9S7E9|GGT2_ARATH Glutamate--glyoxylate aminotransferase 2 OS=Arabidopsis thaliana GN=GGAT2 PE=1 SV=1//0
Cla010060	116.368	34.962	1.7348	0.0065281	0.04935	up	-//-
Cla010072	2004.89	1321.19	0.60169	0.003696	0.032059	up	sp|Q9LDA9|CAF2P_ARATH CRS2-associated factor 2, chloroplastic OS=Arabidopsis thaliana GN=At1g23400 PE=2 SV=1//0
Cla010078	48.6307	14.8868	1.7078	0.0064029	0.048722	up	sp|Q8GYN9|MENB_ARATH 1,4-dihydroxy-2-naphthoyl-CoA synthase, peroxisomal OS=Arabidopsis thaliana GN=MENB PE=1 SV=2//0
Cla010087	933.862	606.219	0.62337	0.0060126	0.046441	up	sp|Q9ZUC1|QORL_ARATH Quinone oxidoreductase-like protein At1g23740, chloroplastic OS=Arabidopsis thaliana GN=At1g23740 PE=2 SV=2//2.76797e-175
Cla010100	428.744	200.958	1.0932	3.8521e-05	0.00072662	up	sp|Q8W4I4|POT6_ARATH Potassium transporter 6 OS=Arabidopsis thaliana GN=POT6 PE=2 SV=1//0
Cla010122	420.351	82.8288	2.3434	2.2493e-14	2.2672e-12	up	sp|O82798|ARR4_ARATH Two-component response regulator ARR4 OS=Arabidopsis thaliana GN=ARR4 PE=1 SV=1//1.19591e-45
Cla010129	138.528	64.8157	1.0958	0.0059806	0.046315	up	sp|Q6NQK9|CCB4_ARATH Protein COFACTOR ASSEMBLY OF COMPLEX C SUBUNIT B CCB4, chloroplastic OS=Arabidopsis thaliana GN=CCB4 PE=1 SV=1//2.98036e-103
Cla010140	355.441	202.276	0.81328	0.0049783	0.039922	up	sp|Q0WQW5|PPR85_ARATH Pentatricopeptide repeat-containing protein At1g59720, chloroplastic/mitochondrial OS=Arabidopsis thaliana GN=PCMP-H51 PE=2 SV=2//0
Cla010152	2697.24	731.352	1.8828	6.6428e-18	1.1453e-15	up	-//-
Cla010165	1970.38	591.993	1.7348	7.1352e-15	7.8348e-13	up	sp|Q9M9S4|Y1143_ARATH Probable LRR receptor-like serine/threonine-protein kinase At1g14390 OS=Arabidopsis thaliana GN=At1g14390 PE=2 SV=1//0
Cla010168	439.002	179.757	1.2882	2.8744e-06	7.3659e-05	up	-//-
Cla010169	354.901	80.1663	2.1463	0.00022547	0.0032754	up	sp|Q8LC03|ATB13_ARATH Homeobox-leucine zipper protein ATHB-13 OS=Arabidopsis thaliana GN=ATHB-13 PE=2 SV=2//9.9745e-116
Cla010180	981.92	581.892	0.75485	0.0013773	0.014632	up	-//-
Cla010192	234.415	47.9813	2.2885	1.444e-10	8.1791e-09	up	sp|Q93ZL5|CDF2_ARATH Cyclic dof factor 2 OS=Arabidopsis thaliana GN=CDF2 PE=1 SV=2//4.61198e-69
Cla010199	1245.54	667.45	0.90004	0.00020746	0.0030568	up	-//-
Cla010224	19.738	1.16103	4.0875	0.0019743	0.019608	up	-//-
Cla010230	40.1957	6.39398	2.6523	0.00061369	0.0074688	up	sp|Q9M202|ZAT9_ARATH Zinc finger protein ZAT9 OS=Arabidopsis thaliana GN=ZAT9 PE=2 SV=1//1.47252e-12
Cla010242	2668.83	1693.77	0.65597	0.00094595	0.010673	up	sp|Q9M8T3|Y2910_ARATH Putative gamma-glutamylcyclotransferase At3g02910 OS=Arabidopsis thaliana GN=At3g02910 PE=2 SV=2//6.55461e-66
Cla010245	3614.15	1758.84	1.039	9.9737e-07	2.8005e-05	up	-//-
Cla010265	6135.93	2976.02	1.0439	3.4599e-05	0.00066281	up	-//-
Cla010271	2546.09	958.74	1.4091	5.1665e-11	3.1342e-09	up	sp|Q93Z70|ARGC_ARATH Probable N-acetyl-gamma-glutamyl-phosphate reductase, chloroplastic OS=Arabidopsis thaliana GN=At2g19940 PE=1 SV=2//0
Cla010275	13816.3	4158.46	1.7323	1.7263e-17	2.8513e-15	up	-//-
Cla010279	2498.3	1650.73	0.59784	0.0053933	0.042538	up	sp|Q9XIB5|REM19_ARATH B3 domain-containing protein REM19 OS=Arabidopsis thaliana GN=REM19 PE=1 SV=1//1.59522e-26
Cla010284	880.741	335.794	1.3911	7.8174e-07	2.2529e-05	up	-//-
Cla010302	96.1716	39.672	1.2775	0.0030449	0.027618	up	-//-
Cla010321	283.419	72.2463	1.9719	3.213e-09	1.4484e-07	up	sp|Q38864|EXPA5_ARATH Expansin-A5 OS=Arabidopsis thaliana GN=EXPA5 PE=2 SV=1//3.18554e-126
Cla010328	7147.91	1253.27	2.5118	7.0157e-15	7.7469e-13	up	sp|Q1PDW5|FTSH6_ARATH ATP-dependent zinc metalloprotease FTSH 6, chloroplastic OS=Arabidopsis thaliana GN=FTSH6 PE=2 SV=1//0
Cla010335	765.562	365.941	1.0649	1.9005e-05	0.00039363	up	sp|Q9LU10|DEGP8_ARATH Protease Do-like 8, chloroplastic OS=Arabidopsis thaliana GN=DEGP8 PE=1 SV=1//0
Cla010358	459.347	279.534	0.71656	0.0051811	0.041145	up	sp|O34331|YLBH_BACSU Putative rRNA methyltransferase YlbH OS=Bacillus subtilis (strain 168) GN=ylbH PE=3 SV=2//4.1874e-12
Cla010376	2427.25	1390.86	0.80335	0.00017025	0.002592	up	sp|Q8IUH2|CREG2_HUMAN Protein CREG2 OS=Homo sapiens GN=CREG2 PE=1 SV=1//8.54468e-32
Cla010377	3810.71	1965.05	0.95549	6.5506e-06	0.0001542	up	sp|O49856|FTRC_SOYBN Ferredoxin-thioredoxin reductase catalytic chain, chloroplastic OS=Glycine max GN=FTRC PE=2 SV=1//1.28071e-77
Cla010387	1981.41	1145.43	0.79064	0.00046545	0.0059872	up	sp|Q94JU2|WTR18_ARATH WAT1-related protein At3g28050 OS=Arabidopsis thaliana GN=At3g28050 PE=2 SV=1//6.32431e-119
Cla010405	3850.3	1426.18	1.4328	3.8926e-11	2.4059e-09	up	sp|O22609|DEGP1_ARATH Protease Do-like 1, chloroplastic OS=Arabidopsis thaliana GN=DEGP1 PE=1 SV=2//0
Cla010406	90.8719	28.5155	1.6721	0.00044953	0.0058282	up	-//-
Cla010408	1199.65	791.239	0.60043	0.0052913	0.041902	up	sp|Q500U8|TKPR1_ARATH Tetraketide alpha-pyrone reductase 1 OS=Arabidopsis thaliana GN=TKPR1 PE=1 SV=1//1.30031e-33
Cla010411	85.8034	9.40185	3.19	8.2501e-08	2.8853e-06	up	sp|P36210|RK121_ARATH 50S ribosomal protein L12-1, chloroplastic OS=Arabidopsis thaliana GN=RPL12A PE=2 SV=1//2.77702e-60
Cla010422	2376.85	1360.82	0.80457	0.00028573	0.0039915	up	sp|P61817|SIRB_BACME Sirohydrochlorin ferrochelatase OS=Bacillus megaterium GN=sirB PE=3 SV=1//2.11225e-12
Cla010430	125.793	47.2955	1.4113	0.00054828	0.0068335	up	-//-
Cla010434	2226.72	605.466	1.8788	6.7684e-17	1.0078e-14	up	sp|P73627|Y1770_SYNY3 Uncharacterized protein sll1770 OS=Synechocystis sp. (strain PCC 6803 / Kazusa) GN=sll1770 PE=3 SV=1//3.56443e-69
Cla010458	638.731	262.703	1.2818	3.2702e-07	1.0203e-05	up	sp|O80885|ARASP_ARATH Membrane metalloprotease ARASP, chloroplastic OS=Arabidopsis thaliana GN=ARASP PE=2 SV=1//1.77909e-170
Cla010475	762.602	262.139	1.5406	1.0535e-09	5.0893e-08	up	-//-
Cla010476	25.9518	2.73783	3.2447	0.0024126	0.023042	up	sp|O49595|HMGB1_ARATH High mobility group B protein 1 OS=Arabidopsis thaliana GN=HMGB1 PE=1 SV=1//3.1994e-17
Cla010519	9830.82	3193.25	1.6223	1.6029e-10	9.0013e-09	up	sp|Q9SNV9|NRAM3_ARATH Metal transporter Nramp3 OS=Arabidopsis thaliana GN=NRAMP3 PE=2 SV=2//0
Cla010584	623.07	335.184	0.89444	0.00021629	0.0031655	up	sp|Q9LYG9|MSL10_ARATH Mechanosensitive ion channel protein 10 OS=Arabidopsis thaliana GN=MSL10 PE=1 SV=1//7.00162e-179
Cla010630	4409.73	2440.18	0.85371	2.9192e-05	0.00056978	up	-//-
Cla010643	4717.68	3129.07	0.59234	0.0027249	0.025359	up	sp|Q5N800|NYC1_ORYSJ Probable chlorophyll(ide) b reductase NYC1, chloroplastic OS=Oryza sativa subsp. japonica GN=NYC1 PE=1 SV=1//0
Cla010649	1593.05	664.588	1.2613	1.6299e-08	6.4848e-07	up	sp|Q8S9D1|PP395_ARATH Pentatricopeptide repeat-containing protein At5g21222 OS=Arabidopsis thaliana GN=ATC401 PE=2 SV=1//8.65815e-16
Cla010650	1632.04	783.749	1.0582	3.4816e-06	8.7958e-05	up	sp|Q8H0W1|PLSP1_ARATH Chloroplast processing peptidase OS=Arabidopsis thaliana GN=PLSP1 PE=2 SV=2//1.04931e-119
Cla010665	9523.15	4452.98	1.0967	8.0708e-08	2.8298e-06	up	sp|Q7XZQ7|FL3H_PETCR Flavanone 3-dioxygenase OS=Petroselinum crispum GN=FHT PE=1 SV=1//6.65187e-65
Cla010688	400.675	231.724	0.79002	0.0056499	0.044092	up	sp|Q8L844|PP413_ARATH Pentatricopeptide repeat-containing protein At5g42310, mitochondrial OS=Arabidopsis thaliana GN=At5g42310 PE=2 SV=1//7.51183e-22
Cla010694	2099.15	1350.82	0.63597	0.0040148	0.03412	up	sp|Q9M876|SYYM_ARATH Tyrosine--tRNA ligase, chloroplastic/mitochondrial OS=Arabidopsis thaliana GN=EMB2768 PE=2 SV=1//0
Cla010711	57.4417	11.1959	2.3591	0.0042902	0.035882	up	sp|Q9FPT1|UBP12_ARATH Ubiquitin carboxyl-terminal hydrolase 12 OS=Arabidopsis thaliana GN=UBP12 PE=1 SV=2//8.83489e-06
Cla010712	589.147	244.349	1.2697	0.0013195	0.014141	up	sp|Q40479|ERF2_TOBAC Ethylene-responsive transcription factor 2 OS=Nicotiana tabacum GN=ERF2 PE=2 SV=1//8.7104e-51
Cla010733	251.869	31.6704	2.9915	2.4446e-15	2.9298e-13	up	sp|Q8VYT5|FB254_ARATH F-box protein At5g07670 OS=Arabidopsis thaliana GN=At5g07670 PE=2 SV=1//6.31652e-176
Cla010757	127.814	44.0107	1.5381	0.00017918	0.0027029	up	sp|Q5T1Q4|S35F1_HUMAN Solute carrier family 35 member F1 OS=Homo sapiens GN=SLC35F1 PE=2 SV=2//3.61331e-44
Cla010759	38.7149	3.51337	3.462	0.00159	0.0165	up	-//-
Cla010777	267.222	134.028	0.99551	0.0019094	0.019089	up	sp|O05235|YUGF_BACSU Uncharacterized hydrolase YugF OS=Bacillus subtilis (strain 168) GN=yugF PE=3 SV=1//6.62307e-13
Cla010783	5866.52	2917.02	1.008	5.4293e-06	0.00013062	up	sp|Q8L9Y0|SCP25_ARATH Serine carboxypeptidase-like 25 OS=Arabidopsis thaliana GN=SCPL25 PE=2 SV=2//1.28744e-21
Cla010789	2166.43	90.7092	4.5779	3.1269e-27	1.5365e-24	up	sp|Q9FFX0|RBL9_ARATH RHOMBOID-like protein 9, chloroplastic OS=Arabidopsis thaliana GN=RBL9 PE=2 SV=1//1.31609e-87
Cla010793	38.117	0.408263	6.5448	7.0978e-05	0.0012195	up	sp|Q96502|COL2_ARATH Zinc finger protein CONSTANS-LIKE 2 OS=Arabidopsis thaliana GN=COL2 PE=1 SV=1//1.84941e-06
Cla010823	230.806	111.307	1.0521	0.00064106	0.0077443	up	sp|Q9SCZ4|FERON_ARATH Receptor-like protein kinase FERONIA OS=Arabidopsis thaliana GN=FER PE=1 SV=1//0
Cla010836	2640.81	1422.15	0.89291	3.6265e-05	0.00069133	up	sp|Q9Y7K5|YGI3_SCHPO Uncharacterized WD repeat-containing protein C2A9.03 OS=Schizosaccharomyces pombe (strain 972 / ATCC 24843) GN=SPBC2A9.03 PE=3 SV=2//8.63154e-35
Cla010839	2733.82	1222.05	1.1616	1.1402e-07	3.9193e-06	up	sp|Q9SAC0|ZCIS_ARATH 15-cis-zeta-carotene isomerase, chloroplastic OS=Arabidopsis thaliana GN=Z-ISO PE=1 SV=1//8.49758e-171
Cla010862	6505.18	3956.02	0.71754	0.00045417	0.005869	up	sp|Q6ZY51|PWD_ARATH Phosphoglucan, water dikinase, chloroplastic OS=Arabidopsis thaliana GN=GWD3 PE=1 SV=1//0
Cla010884	2260.89	1454.26	0.63661	0.0017264	0.017674	up	sp|Q8VZR6|INT1_ARATH Inositol transporter 1 OS=Arabidopsis thaliana GN=INT1 PE=1 SV=1//0
Cla010898	16030.5	6185.27	1.3739	1.0321e-09	5.009e-08	up	sp|P80093|PDS_CAPAN 15-cis-phytoene desaturase, chloroplastic/chromoplastic OS=Capsicum annuum GN=PDS PE=1 SV=1//0
Cla010899	373.505	145.921	1.3559	6.6048e-06	0.00015528	up	sp|Q03943|IM30_PEA Membrane-associated 30 kDa protein, chloroplastic OS=Pisum sativum GN=IM30 PE=2 SV=1//1.24828e-17
Cla010900	1471.64	625.951	1.2333	6.291e-08	2.2441e-06	up	sp|Q03943|IM30_PEA Membrane-associated 30 kDa protein, chloroplastic OS=Pisum sativum GN=IM30 PE=2 SV=1//3.15157e-112
Cla010956	417.908	207.506	1.01	0.0053582	0.042347	up	sp|Q9SA52|CP41B_ARATH Chloroplast stem-loop binding protein of 41 kDa b, chloroplastic OS=Arabidopsis thaliana GN=CSP41B PE=1 SV=1//0
Cla010961	2246.47	1191.18	0.91527	2.2982e-05	0.00046473	up	sp|O23403|PPD1_ARATH PsbP domain-containing protein 1, chloroplastic OS=Arabidopsis thaliana GN=PPD1 PE=1 SV=1//7.53774e-96
Cla010985	20126.8	4877.36	2.0449	1.1684e-08	4.7844e-07	up	sp|O23482|OPT3_ARATH Oligopeptide transporter 3 OS=Arabidopsis thaliana GN=OPT3 PE=2 SV=3//0
Cla010997	6085.87	2959.66	1.04	2.7758e-07	8.7996e-06	up	sp|Q9FIK7|THIC2_ARATH Probable acetyl-CoA acetyltransferase, cytosolic 2 OS=Arabidopsis thaliana GN=At5g47720 PE=2 SV=1//0
Cla010998	6618.56	4291.15	0.62515	0.0024085	0.023025	up	sp|Q41014|FENR2_PEA Ferredoxin--NADP reductase, root isozyme, chloroplastic OS=Pisum sativum PE=2 SV=2//0
Cla011008	57.6879	1.29605	5.4761	1.1527e-06	3.2047e-05	up	sp|Q6ID77|MED11_ARATH Mediator of RNA polymerase II transcription subunit 11 OS=Arabidopsis thaliana GN=MED11 PE=1 SV=1//1.89331e-28
Cla011063	687.996	228.345	1.5912	9.7007e-10	4.7309e-08	up	sp|O64864|YLS3_ARATH Protein YLS3 OS=Arabidopsis thaliana GN=YLS3 PE=2 SV=1//1.13248e-40
Cla011077	2223.18	1309.37	0.76375	0.00020194	0.0029933	up	sp|Q9M2E2|SDR1_ARATH (+)-neomenthol dehydrogenase OS=Arabidopsis thaliana GN=SDR1 PE=1 SV=1//1.76594e-96
Cla011088	1824.13	861.322	1.0826	1.225e-06	3.4007e-05	up	sp|P93841|ISPE_SOLLC 4-diphosphocytidyl-2-C-methyl-D-erythritol kinase, chloroplastic/chromoplastic (Fragment) OS=Solanum lycopersicum GN=ISPE PE=1 SV=1//3.51556e-172
Cla011110	164.281	74.9915	1.1314	0.0025715	0.024241	up	-//-
Cla011131	24844.7	15202.7	0.70861	0.00038865	0.0051614	up	sp|P13708|SUSY_SOYBN Sucrose synthase OS=Glycine max GN=SS PE=1 SV=2//0
Cla011138	12202.8	6855.71	0.83184	4.6126e-05	0.00084102	up	sp|O65282|CH10C_ARATH 20 kDa chaperonin, chloroplastic OS=Arabidopsis thaliana GN=CPN21 PE=1 SV=2//3.63025e-132
Cla011174	3409.17	469.033	2.8617	1.0108e-36	9.0304e-34	up	-//-
Cla011176	235.606	71.9544	1.7112	2.789e-05	0.00054873	up	sp|Q9LRB7|EL5_ORYSJ E3 ubiquitin-protein ligase EL5 OS=Oryza sativa subsp. japonica GN=EL5.1 PE=1 SV=1//3.18796e-16
Cla011183	1833.68	1223.29	0.58397	0.0064132	0.048782	up	sp|Q9MT28|THRC_SOLTU Threonine synthase, chloroplastic OS=Solanum tuberosum PE=2 SV=1//0
Cla011187	4440.13	2738.82	0.69705	0.00090923	0.010312	up	sp|Q9S7U9|M2K2_ARATH Mitogen-activated protein kinase kinase 2 OS=Arabidopsis thaliana GN=MKK2 PE=1 SV=2//2.88458e-177
Cla011191	2580.45	1522.89	0.76081	0.00032639	0.0044581	up	-//-
Cla011233	856.671	299.32	1.5171	1.1676e-09	5.5972e-08	up	-//-
Cla011244	1708.77	616.39	1.471	0.00017917	0.0027029	up	sp|Q8H1S0|MIOX4_ARATH Inositol oxygenase 4 OS=Arabidopsis thaliana GN=MIOX4 PE=2 SV=1//4.13508e-132
Cla011263	904.961	541.408	0.74114	0.0015199	0.015932	up	sp|O94631|MRM1_SCHPO rRNA methyltransferase 1, mitochondrial OS=Schizosaccharomyces pombe (strain 972 / ATCC 24843) GN=mrm1 PE=3 SV=1//7.52464e-39
Cla011272	822.181	448.615	0.87398	0.00024164	0.0034642	up	sp|O34598|GUAD_BACSU Guanine deaminase OS=Bacillus subtilis (strain 168) GN=guaD PE=1 SV=1//5.80351e-36
Cla011292	364.289	84.0832	2.1152	0.00010016	0.0016323	up	sp|O22768|UNE12_ARATH Transcription factor UNE12 OS=Arabidopsis thaliana GN=UNE12 PE=2 SV=2//3.02151e-52
Cla011293	5127.68	1527.61	1.747	2.8008e-16	3.8229e-14	up	sp|Q9XH46|TATA_PEA Sec-independent protein translocase protein TATA, chloroplastic OS=Pisum sativum GN=TATA PE=1 SV=1//6.30133e-40
Cla011315	10142.7	3996.05	1.3438	0.0027756	0.025709	up	sp|B5X570|NAC14_ARATH NAC domain-containing protein 14 OS=Arabidopsis thaliana GN=NAC014 PE=2 SV=1//9.61098e-50
Cla011317	652.432	287.77	1.1809	4.5698e-06	0.00011242	up	sp|Q9FMX0|SODF3_ARATH Superoxide dismutase [Fe] 3, chloroplastic OS=Arabidopsis thaliana GN=FSD3 PE=1 SV=1//4.41336e-135
Cla011336	2185.62	1286.27	0.76484	0.00055555	0.0068965	up	-//-
Cla011356	9614.61	6423.22	0.58193	0.0036256	0.031573	up	sp|P37707|B2_DAUCA B2 protein OS=Daucus carota PE=2 SV=1//7.89129e-94
Cla011368	9684.88	3457.68	1.4859	1.4207e-12	1.0993e-10	up	sp|A2RVM0|TIC32_ARATH Short-chain dehydrogenase TIC 32, chloroplastic OS=Arabidopsis thaliana GN=TIC32 PE=2 SV=1//6.54686e-72
Cla011414	9955.59	5034.34	0.9837	7.6096e-06	0.00017721	up	-//-
Cla011427	535.913	170.521	1.6521	1.1244e-05	0.00024779	up	sp|Q9SUS5|RHA1B_ARATH E3 ubiquitin-protein ligase RHA1B OS=Arabidopsis thaliana GN=RHA1B PE=2 SV=1//1.1981e-19
Cla011437	111070	71817.1	0.62907	0.00096283	0.010808	up	sp|Q6EU94|PIP11_ORYSJ Aquaporin PIP1-1 OS=Oryza sativa subsp. japonica GN=PIP1-1 PE=2 SV=1//0
Cla011457	17406.8	10491.6	0.73042	0.006639	0.049957	up	sp|O48646|GPX6_ARATH Probable phospholipid hydroperoxide glutathione peroxidase 6, mitochondrial OS=Arabidopsis thaliana GN=GPX6 PE=2 SV=2//5.71977e-103
Cla011480	6240.69	1260.49	2.3077	6.1562e-11	3.689e-09	up	sp|Q9CAN1|RBL2_ARATH RHOMBOID-like protein 2 OS=Arabidopsis thaliana GN=RBL2 PE=1 SV=1//4.19409e-124
Cla011503	3281.59	646.163	2.3444	7.3714e-26	3.0826e-23	up	sp|A7VLV1|SGRW_PEA Protein STAY-GREEN, chloroplastic OS=Pisum sativum GN=SGR PE=2 SV=1//2.34744e-102
Cla011533	4949.7	2335.82	1.0834	2.4547e-07	7.8451e-06	up	sp|Q9XJ36|CLPR2_ARATH ATP-dependent Clp protease proteolytic subunit-related protein 2, chloroplastic OS=Arabidopsis thaliana GN=CLPR2 PE=1 SV=1//2.338e-143
Cla011536	148.975	61.3558	1.2798	0.00083447	0.009614	up	sp|Q9LXU9|IRKI_ARATH IRK-interacting protein OS=Arabidopsis thaliana GN=IRKI PE=1 SV=1//2.84702e-71
Cla011549	1565.26	476.334	1.7164	8.8123e-14	7.873e-12	up	-//-
Cla011552	1683.95	1010.41	0.73692	0.00090838	0.010308	up	sp|I1K0K6|EFGC2_SOYBN Elongation factor G-2, chloroplastic OS=Glycine max GN=fusA2 PE=3 SV=1//0
Cla011555	2211	574.949	1.9432	4.8224e-18	8.5391e-16	up	sp|Q8H1Q1|TL225_ARATH Thylakoid lumenal protein At1g12250, chloroplastic OS=Arabidopsis thaliana GN=At1g12250 PE=1 SV=1//1.89973e-108
Cla011559	33.7523	4.85497	2.7975	0.0016785	0.017273	up	sp|Q43857|INVA_VICFA Acid beta-fructofuranosidase OS=Vicia faba GN=VCINV PE=2 SV=1//0
Cla011561	2989.01	1705.25	0.80968	0.00026264	0.0037164	up	sp|P49245|FABH2_CUPWR 3-oxoacyl-[acyl-carrier-protein] synthase 3 B, chloroplastic OS=Cuphea wrightii GN=KAS3B PE=2 SV=1//0
Cla011573	8325.05	716.323	3.5388	1.3002e-17	2.1842e-15	up	sp|P14009|14KD_DAUCA 14 kDa proline-rich protein DC2.15 OS=Daucus carota PE=2 SV=1//1.91912e-25
Cla011574	150735	43081.6	1.8069	1.953e-11	1.2725e-09	up	sp|Q9S7I2|AIR1_ARATH Putative lipid-binding protein AIR1 OS=Arabidopsis thaliana GN=AIR1 PE=2 SV=1//6.31944e-22
Cla011575	23.7203	0	Inf	1.4539e-05	0.00030926	up	sp|Q39176|ERLI1_ARATH Lipid transfer protein EARLI 1 OS=Arabidopsis thaliana GN=EARLI1 PE=1 SV=1//7.00876e-17
Cla011596	912.25	487.12	0.90515	0.00017623	0.0026686	up	-//-
Cla011597	4020.31	1825.05	1.1394	7.1602e-08	2.5266e-06	up	sp|O34371|YTET_BACSU Putative oxidoreductase YteT OS=Bacillus subtilis (strain 168) GN=yteT PE=2 SV=1//4.44357e-10
Cla011657	1044.34	259.698	2.0077	7.4158e-17	1.0797e-14	up	-//-
Cla011658	3426.93	880.857	1.9599	3.0072e-20	7.1213e-18	up	sp|Q9S745|PAD4_ARATH Lipase-like PAD4 OS=Arabidopsis thaliana GN=PAD4 PE=1 SV=1//3.3328e-17
Cla011663	2068.84	710.124	1.5427	3.6346e-07	1.1246e-05	up	sp|Q9FG36|TRL31_ARATH Thioredoxin-like 3-1, chloroplastic OS=Arabidopsis thaliana GN=WCRKC1 PE=2 SV=3//8.07004e-62
Cla011676	7096.98	2969.81	1.2568	6.5426e-05	0.001139	up	sp|Q0WP85|PP150_ARATH Pentatricopeptide repeat-containing protein At2g13420, mitochondrial OS=Arabidopsis thaliana GN=At2g13420 PE=2 SV=1//0
Cla011733	312.933	158.188	0.98421	0.001595	0.016527	up	sp|O81832|Y4729_ARATH G-type lectin S-receptor-like serine/threonine-protein kinase At4g27290 OS=Arabidopsis thaliana GN=At4g27290 PE=3 SV=4//0
Cla011742	4038.12	1900.66	1.0872	1.2089e-07	4.1395e-06	up	sp|Q8H151|AAE13_ARATH Malonate--CoA ligase OS=Arabidopsis thaliana GN=AAE13 PE=1 SV=1//0
Cla011748	295.735	34.9536	3.0808	2.3622e-18	4.3783e-16	up	sp|P27489|CB23_SOLLC Chlorophyll a-b binding protein 13, chloroplastic OS=Solanum lycopersicum GN=CAB13 PE=1 SV=1//2.0419e-170
Cla011749	2442.94	972.956	1.3282	7.6038e-10	3.7741e-08	up	sp|Q2QY07|CCDA2_ORYSJ Cytochrome c-type biogenesis ccda-like chloroplastic protein 2 OS=Oryza sativa subsp. japonica GN=CCDA2 PE=3 SV=1//1.29786e-129
Cla011751	16.0395	0	Inf	0.00055163	0.0068666	up	sp|Q40977|MDAR_PEA Monodehydroascorbate reductase OS=Pisum sativum PE=1 SV=1//0
Cla011754	1505.66	901.395	0.74016	0.00078832	0.009201	up	-//-
Cla011758	210.658	97.9529	1.1047	0.00065899	0.0079268	up	sp|P82869|CYP37_ARATH Peptidyl-prolyl cis-trans isomerase CYP37, chloroplastic OS=Arabidopsis thaliana GN=CYP37 PE=1 SV=3//0
Cla011759	21019.8	12142.8	0.79164	4.9742e-05	0.00089285	up	sp|Q754F0|SYM1_ASHGO Protein SYM1 OS=Ashbya gossypii (strain ATCC 10895 / CBS 109.51 / FGSC 9923 / NRRL Y-1056) GN=SYM1 PE=3 SV=1//7.17309e-12
Cla011760	24129.9	13675.4	0.81924	1.9232e-05	0.0003979	up	sp|Q9LD44|NAC56_ARATH NAC transcription factor 56 OS=Arabidopsis thaliana GN=NAC056 PE=2 SV=1//3.38833e-106
Cla011786	7275.38	1669.81	2.1233	1.5903e-23	5.0416e-21	up	sp|Q9SEU6|TRXM4_ARATH Thioredoxin M4, chloroplastic OS=Arabidopsis thaliana GN=At3g15360 PE=2 SV=2//1.87894e-57
Cla011898	1274.61	589.019	1.1137	1.2692e-06	3.5185e-05	up	sp|Q84WN0|Y4920_ARATH Uncharacterized protein At4g37920, chloroplastic OS=Arabidopsis thaliana GN=At4g37920 PE=1 SV=2//6.15527e-92
Cla011904	2032.23	1051.4	0.95075	1.5632e-05	0.00033108	up	-//-
Cla011918	1557.43	832.696	0.9033	3.8444e-05	0.00072585	up	-//-
Cla011965	813.643	438.354	0.8923	0.0002649	0.0037431	up	-//-
Cla011998	18197.8	10731.1	0.76197	0.00017962	0.0027074	up	sp|Q9SFH9|HEM21_ARATH Delta-aminolevulinic acid dehydratase 1, chloroplastic OS=Arabidopsis thaliana GN=HEMB1 PE=2 SV=1//0
Cla011999	958.302	516.102	0.89282	0.00011944	0.0019086	up	sp|Q84K71|MATE2_ARATH MATE efflux family protein 2, chloroplastic OS=Arabidopsis thaliana GN=DTX44 PE=2 SV=1//6.20125e-143
Cla012000	1559.72	952.046	0.71219	0.00080368	0.009332	up	sp|Q0JQF7|DRE2A_ORYSJ Dehydration-responsive element-binding protein 2A OS=Oryza sativa subsp. japonica GN=DREB2A PE=2 SV=1//7.65001e-42
Cla012017	13562.7	7602.68	0.83506	2.9761e-05	0.00057802	up	sp|Q94AL9|AGT22_ARATH Alanine--glyoxylate aminotransferase 2 homolog 2, mitochondrial OS=Arabidopsis thaliana GN=AGT3 PE=1 SV=2//0
Cla012028	1104.86	689.142	0.68098	0.0028778	0.026467	up	-//-
Cla012046	2859.46	1134.69	1.3334	5.0659e-10	2.582e-08	up	sp|Q7X9V3|NSI_ARATH Acetyltransferase NSI OS=Arabidopsis thaliana GN=NSI PE=1 SV=1//5.39214e-94
Cla012047	2759.66	1766.13	0.6439	0.0018837	0.018871	up	sp|C0LGD7|Y1684_ARATH Probable LRR receptor-like serine/threonine-protein kinase At1g06840 OS=Arabidopsis thaliana GN=At1g06840 PE=2 SV=2//0
Cla012065	2035	1105.09	0.88087	4.0046e-05	0.00074749	up	sp|Q8DJB3|GRPE_THEEB Protein GrpE OS=Thermosynechococcus elongatus (strain BP-1) GN=grpE PE=3 SV=1//8.87643e-44
Cla012071	931.899	148.456	2.6501	1.3008e-24	4.6486e-22	up	sp|P27684|PSRP5_SPIOL 50S ribosomal protein 5 alpha, chloroplastic OS=Spinacia oleracea GN=PSRP5 PE=1 SV=1//1.57757e-07
Cla012091	1990	1292.91	0.62215	0.0033596	0.029758	up	sp|Q9LTH4|PCLL_ARATH Transcription factor BOA OS=Arabidopsis thaliana GN=BOA PE=2 SV=1//6.53227e-42
Cla012123	710.904	106.623	2.7371	1.0615e-06	2.9679e-05	up	sp|Q6J9S1|RA211_ARATH Ethylene-responsive transcription factor RAP2-11 OS=Arabidopsis thaliana GN=RAP2-11 PE=2 SV=1//1.20815e-06
Cla012128	4646.88	1925.07	1.2714	3.5189e-10	1.8642e-08	up	-//-
Cla012129	4433.61	2105.69	1.0742	2.8316e-07	8.9622e-06	up	-//-
Cla012134	1249.01	545.89	1.1941	5.0201e-07	1.4973e-05	up	sp|Q9C503|NDF5_ARATH Protein NDH-DEPENDENT CYCLIC ELECTRON FLOW 5 OS=Arabidopsis thaliana GN=NDF5 PE=2 SV=1//3.4294e-78
Cla012138	1710.52	760.409	1.1696	1.6539e-07	5.5099e-06	up	sp|Q9LSF7|Y3518_ARATH B3 domain-containing protein At3g25182 OS=Arabidopsis thaliana GN=At3g25182 PE=2 SV=1//4.81078e-09
Cla012155	75.7447	16.7623	2.1759	0.00014355	0.002227	up	sp|P81392|MYB06_ANTMA Myb-related protein 306 OS=Antirrhinum majus GN=MYB306 PE=2 SV=1//1.3427e-19
Cla012158	3366.05	2215.44	0.60346	0.0032519	0.02904	up	sp|A7SMW7|L2HDH_NEMVE L-2-hydroxyglutarate dehydrogenase, mitochondrial OS=Nematostella vectensis GN=v1g172254 PE=3 SV=1//9.49468e-38
Cla012169	5663.24	1163.9	2.2827	7.0755e-26	3.0826e-23	up	sp|Q6SJV8|CRD1_GOSHI Magnesium-protoporphyrin IX monomethyl ester [oxidative] cyclase, chloroplastic OS=Gossypium hirsutum GN=CRD1 PE=2 SV=2//0
Cla012179	763.797	479.319	0.6722	0.0043421	0.036163	up	sp|Q8GUP1|CTF77_ARATH Cleavage stimulation factor subunit 77 OS=Arabidopsis thaliana GN=CSTF77 PE=1 SV=1//3.77538e-66
Cla012183	81.6797	30.7344	1.4101	0.0029576	0.027051	up	sp|D4N501|DIOX2_PAPSO Probable 2-oxoglutarate/Fe(II)-dependent dioxygenase OS=Papaver somniferum GN=DIOX2 PE=2 SV=1//1.9527e-32
Cla012198	10643.6	7011.09	0.60228	0.0024487	0.023269	up	sp|O22060|SPSA1_CITUN Probable sucrose-phosphate synthase 1 OS=Citrus unshiu GN=SPS1 PE=2 SV=1//0
Cla012206	3942.91	280.72	3.8121	0.00028661	0.0039986	up	sp|Q9SU35|ERLL1_ARATH pEARLI1-like lipid transfer protein 1 OS=Arabidopsis thaliana GN=AZI1 PE=1 SV=1//8.04655e-20
Cla012229	1118.23	605.923	0.88401	9.8579e-05	0.0016106	up	-//-
Cla012245	1487.7	905.684	0.716	0.0013583	0.01447	up	sp|O48782|HMOX1_ARATH Heme oxygenase 1, chloroplastic OS=Arabidopsis thaliana GN=HO1 PE=1 SV=2//1.82678e-141
Cla012281	488.37	193.432	1.3361	0.00019199	0.0028674	up	sp|Q38998|AKT1_ARATH Potassium channel AKT1 OS=Arabidopsis thaliana GN=AKT1 PE=1 SV=2//0
Cla012308	430.18	258.553	0.73448	0.0042296	0.035527	up	sp|O48788|Y2267_ARATH Probable inactive receptor kinase At2g26730 OS=Arabidopsis thaliana GN=At2g26730 PE=1 SV=1//1.19185e-77
Cla012310	796.57	409.254	0.96081	7.6491e-05	0.0012972	up	sp|Q1EBV7|BASS2_ARATH Sodium/pyruvate cotransporter BASS2, chloroplastic OS=Arabidopsis thaliana GN=BASS2 PE=2 SV=1//0
Cla012315	9284.67	3042.74	1.6095	8.066e-16	1.043e-13	up	sp|Q75GK0|IAA11_ORYSJ Auxin-responsive protein IAA11 OS=Oryza sativa subsp. japonica GN=IAA11 PE=2 SV=1//5.19258e-49
Cla012327	424.816	220.632	0.9452	0.00052318	0.0065917	up	sp|Q0JJS8|HF101_ORYSJ Fe-S cluster assembly factor HCF101, chloroplastic OS=Oryza sativa subsp. japonica GN=HCF101 PE=3 SV=3//0
Cla012331	2130.99	831.819	1.3572	3.7917e-10	1.9874e-08	up	sp|Q9LHF5|VIL1_ARATH VIN3-like protein 1 OS=Arabidopsis thaliana GN=VIL1 PE=1 SV=1//6.43217e-173
Cla012350	413694	158773	1.3816	3.6694e-12	2.6911e-10	up	sp|Q08655|ASR1_SOLLC Abscisic stress-ripening protein 1 OS=Solanum lycopersicum GN=ASR1 PE=2 SV=1//4.07873e-07
Cla012354	481.165	183.198	1.3931	4.5765e-07	1.3733e-05	up	sp|Q6QPJ6|PRXQ_POPJC Peroxiredoxin Q, chloroplastic OS=Populus jackii GN=PRXQ PE=1 SV=1//2.79502e-82
Cla012360	3644.85	2329.16	0.64605	0.0017182	0.017608	up	sp|Q9ZUA9|Y2181_ARATH PHD finger protein At2g01810 OS=Arabidopsis thaliana GN=At2g01810 PE=3 SV=1//5.91645e-07
Cla012365	324.893	144.419	1.1697	0.00012588	0.001992	up	sp|Q89AC4|RF2_BUCBP Peptide chain release factor 2 OS=Buchnera aphidicola subsp. Baizongia pistaciae (strain Bp) GN=prfB PE=3 SV=2//1.44111e-12
Cla012368	3885.62	429.103	3.1787	4.6771e-22	1.2768e-19	up	sp|Q9XF89|CB5_ARATH Chlorophyll a-b binding protein CP26, chloroplastic OS=Arabidopsis thaliana GN=LHCB5 PE=1 SV=1//1.89081e-140
Cla012421	764.532	486.793	0.65127	0.0045636	0.037564	up	sp|O80763|NRX1_ARATH Probable nucleoredoxin 1 OS=Arabidopsis thaliana GN=At1g60420 PE=1 SV=1//1.26137e-07
Cla012447	1011.88	629.135	0.6856	0.0040024	0.034055	up	sp|Q55909|Y305_SYNY3 TVP38/TMEM64 family membrane protein slr0305 OS=Synechocystis sp. (strain PCC 6803 / Kazusa) GN=slr0305 PE=3 SV=1//5.42191e-24
Cla012454	15616	8433.11	0.88889	1.0456e-05	0.00023248	up	sp|Q69ZF3|GBA2_MOUSE Non-lysosomal glucosylceramidase OS=Mus musculus GN=Gba2 PE=1 SV=2//1.71077e-177
Cla012465	502.59	48.848	3.363	4.716e-09	2.0507e-07	up	sp|Q9C9I2|ERF21_ARATH Ethylene-responsive transcription factor ERF021 OS=Arabidopsis thaliana GN=ERF021 PE=2 SV=1//7.06052e-52
Cla012489	1296.76	619.663	1.0654	1.361e-05	0.00029203	up	-//-
Cla012497	2267.59	1158.24	0.96923	6.7573e-06	0.00015849	up	-//-
Cla012523	207.79	69.9031	1.5717	9.0043e-06	0.00020436	up	sp|Q9SUE0|YMG12_ARATH YlmG homolog protein 1-2, chloroplastic OS=Arabidopsis thaliana GN=YLMG1-2 PE=2 SV=1//5.7038e-69
Cla012530	954.855	472.355	1.0154	7.235e-06	0.00016889	up	-//-
Cla012533	315.585	119.865	1.3966	5.5864e-06	0.00013374	up	-//-
Cla012541	4403.61	2600.86	0.7597	0.00020589	0.0030381	up	sp|Q9LJH5|GLO4_ARATH Peroxisomal (S)-2-hydroxy-acid oxidase GLO4 OS=Arabidopsis thaliana GN=GLO4 PE=2 SV=1//0
Cla012563	4574.1	3047.35	0.58593	0.0042492	0.035639	up	sp|Q5KQN0|CAX2_ORYSJ Vacuolar cation/proton exchanger 2 OS=Oryza sativa subsp. japonica GN=CAX2 PE=2 SV=2//6.23949e-170
Cla012570	383.916	42.9676	3.1595	4.3757e-09	1.9327e-07	up	sp|Q9SD85|F3PH_ARATH Flavonoid 3&apos;-monooxygenase OS=Arabidopsis thaliana GN=CYP75B1 PE=1 SV=1//3.91951e-138
Cla012578	264.059	97.8431	1.4323	8.2985e-06	0.00019048	up	sp|Q8L8A6|GRF5_ARATH Growth-regulating factor 5 OS=Arabidopsis thaliana GN=GRF5 PE=1 SV=1//2.14797e-63
Cla012588	36.2875	4.74566	2.9348	0.0041403	0.034956	up	sp|Q6AWW5|Y5262_ARATH Ankyrin repeat-containing protein At5g02620 OS=Arabidopsis thaliana GN=At5g02620 PE=1 SV=1//1.12584e-18
Cla012597	6899.28	4589.42	0.58813	0.0044036	0.036551	up	sp|Q9CAJ0|P2C16_ARATH Protein phosphatase 2C 16 OS=Arabidopsis thaliana GN=HAB1 PE=1 SV=1//0
Cla012602	852.387	394.99	1.1097	9.9662e-06	0.00022235	up	sp|F4I907|GLYR2_ARATH Glyoxylate/succinic semialdehyde reductase 2, chloroplastic OS=Arabidopsis thaliana GN=GLYR2 PE=1 SV=1//8.72414e-163
Cla012607	146.768	66.9788	1.1318	0.0025441	0.024029	up	sp|Q9ZQE5|PP153_ARATH Pentatricopeptide repeat-containing protein At2g15690 OS=Arabidopsis thaliana GN=PCMP-H66 PE=2 SV=2//3.52697e-147
Cla012608	3764.2	2255.59	0.73884	0.00044238	0.0057545	up	sp|Q9LRW7|IDD11_ARATH Protein indeterminate-domain 11 OS=Arabidopsis thaliana GN=IDD11 PE=2 SV=1//1.74249e-99
Cla012613	11435.9	4856.79	1.2355	0.0016294	0.016812	up	sp|Q9SCW1|BGAL1_ARATH Beta-galactosidase 1 OS=Arabidopsis thaliana GN=BGAL1 PE=1 SV=1//0
Cla012619	313.13	132.063	1.2455	3.114e-05	0.00060123	up	sp|P0DH62|Y4407_SELML Inactive protein kinase SELMODRAFT_444075 OS=Selaginella moellendorffii GN=SELMODRAFT_444075 PE=2 SV=1//2.30461e-14
Cla012621	948.705	478.696	0.98685	4.3126e-05	0.00079665	up	sp|O82155|DOF17_ARATH Dof zinc finger protein DOF1.7 OS=Arabidopsis thaliana GN=DOF1.7 PE=2 SV=1//4.795e-44
Cla012625	6727.11	3790.16	0.82773	0.00052248	0.0065872	up	sp|Q9M0E2|RL282_ARATH 60S ribosomal protein L28-2 OS=Arabidopsis thaliana GN=RPL28C PE=2 SV=1//2.89925e-76
Cla012641	1333.1	555.818	1.2621	5.74e-08	2.0625e-06	up	sp|Q9KGG1|RADA_BACHD DNA repair protein RadA homolog OS=Bacillus halodurans (strain ATCC BAA-125 / DSM 18197 / FERM 7344 / JCM 9153 / C-125) GN=radA PE=3 SV=1//4.86887e-85
Cla012650	885.255	547.805	0.69243	0.0025806	0.024303	up	sp|F4IB81|LYK3_ARATH LysM domain receptor-like kinase 3 OS=Arabidopsis thaliana GN=LYK3 PE=2 SV=1//0
Cla012660	14073.2	6648	1.082	0.00058102	0.0071464	up	-//-
Cla012670	2145.02	183.155	3.5499	9.4263e-17	1.3524e-14	up	sp|O04006|PSAH_BRACM Photosystem I reaction center subunit VI, chloroplastic OS=Brassica campestris GN=PSAH PE=2 SV=1//1.41784e-47
Cla012701	712.995	227.516	1.6479	5.2643e-11	3.1837e-09	up	sp|Q39090|UFO_ARATH Protein UNUSUAL FLORAL ORGANS OS=Arabidopsis thaliana GN=UFO PE=1 SV=2//4.57936e-13
Cla012703	885.158	445.327	0.99107	4.5193e-05	0.00082845	up	sp|Q9FV53|DEF1A_ARATH Peptide deformylase 1A, chloroplastic/mitochondrial OS=Arabidopsis thaliana GN=PDF1A PE=1 SV=3//1.94781e-123
Cla012708	1108.51	637.015	0.79922	0.0018349	0.018506	up	sp|Q9SSR1|Y1259_ARATH DCC family protein At1g52590, chloroplastic OS=Arabidopsis thaliana GN=At1g52590 PE=2 SV=1//1.32076e-63
Cla012720	448.089	121.413	1.8839	3.0146e-11	1.9113e-09	up	sp|Q949X0|ADS3_ARATH Palmitoyl-monogalactosyldiacylglycerol delta-7 desaturase, chloroplastic OS=Arabidopsis thaliana GN=ADS3 PE=2 SV=2//1.65878e-174
Cla012741	158.494	75.8191	1.0638	0.0034249	0.030187	up	sp|Q9SIY3|TTM3_ARATH Triphosphate tunel metalloenzyme 3 OS=Arabidopsis thaliana GN=TTM3 PE=1 SV=1//1.11691e-47
Cla012748	2165.05	1380.44	0.64927	0.0027459	0.025494	up	sp|Q8DKR7|DNAJ_THEEB Chaperone protein DnaJ OS=Thermosynechococcus elongatus (strain BP-1) GN=dnaJ PE=3 SV=2//2.40475e-103
Cla012783	76.5441	19.7935	1.9513	0.00020253	0.0029998	up	-//-
Cla012805	6279.82	1522.65	2.0441	1.4377e-14	1.4951e-12	up	sp|Q9T0A4|NDHS_ARATH NAD(P)H-quinone oxidoreductase subunit S, chloroplastic OS=Arabidopsis thaliana GN=ndhS PE=1 SV=1//1.00276e-73
Cla012809	15471	10174.9	0.60455	0.0023745	0.022766	up	sp|O65781|GALE2_CYATE UDP-glucose 4-epimerase GEPI48 OS=Cyamopsis tetragonoloba PE=2 SV=1//0
Cla012815	774.401	382.196	1.0188	3.0771e-05	0.00059587	up	-//-
Cla012853	2443.95	1677.07	0.54327	0.0066228	0.049874	up	sp|Q402F4|TOM1_TOBAC Tobamovirus multiplication protein 1 OS=Nicotiana tabacum GN=TOM1 PE=1 SV=1//5.9923e-56
Cla012872	2088.67	1350.22	0.62939	0.0048556	0.039178	up	sp|Q8GYB8|OPR2_ARATH 12-oxophytodienoate reductase 2 OS=Arabidopsis thaliana GN=OPR2 PE=1 SV=2//0
Cla012897	2226.65	1191.21	0.90245	1.8236e-05	0.00037969	up	sp|Q9FY69|BH143_ARATH Transcription factor bHLH143 OS=Arabidopsis thaliana GN=BHLH143 PE=2 SV=1//3.23993e-24
Cla012943	11352.5	4088.25	1.4735	5.3421e-13	4.3209e-11	up	sp|P31593|GSA_TOBAC Glutamate-1-semialdehyde 2,1-aminomutase, chloroplastic OS=Nicotiana tabacum GN=GSA PE=2 SV=1//0
Cla012950	1917.87	556.589	1.7848	3.0832e-15	3.6072e-13	up	sp|Q9C5C8|MSRB2_ARATH Peptide methionine sulfoxide reductase B2, chloroplastic OS=Arabidopsis thaliana GN=MSRB2 PE=1 SV=1//1.01436e-80
Cla012964	111.542	11.3676	3.2946	1.1144e-10	6.3858e-09	up	sp|Q9LZB2|GDL74_ARATH GDSL esterase/lipase At5g03980 OS=Arabidopsis thaliana GN=At5g03980 PE=2 SV=1//7.49527e-94
Cla012984	1968.32	508.08	1.9538	7.2043e-15	7.8667e-13	up	sp|Q9SRQ1|C89A9_ARATH Cytochrome P450 89A9 OS=Arabidopsis thaliana GN=CYP89A9 PE=2 SV=1//0
Cla012985	1780.53	1187.24	0.5847	0.0061886	0.047422	up	sp|Q42602|C89A2_ARATH Cytochrome P450 89A2 OS=Arabidopsis thaliana GN=CYP89A2 PE=2 SV=2//0
Cla013020	24064.8	12600	0.93349	0.0039411	0.03365	up	sp|P16972|FER2_ARATH Ferredoxin-2, chloroplastic OS=Arabidopsis thaliana GN=FD2 PE=1 SV=1//5.32241e-62
Cla013046	60.4189	9.34266	2.6931	5.0342e-05	0.00090117	up	sp|Q8LG89|BABL_ARATH Basic blue protein OS=Arabidopsis thaliana GN=ARPN PE=2 SV=2//1.64312e-37
Cla013048	35.0736	0	Inf	0.0018655	0.018736	up	sp|Q8LG89|BABL_ARATH Basic blue protein OS=Arabidopsis thaliana GN=ARPN PE=2 SV=2//1.09792e-48
Cla013062	2675.85	1061.89	1.3334	3.6545e-10	1.9257e-08	up	sp|P38500|NIR_BETPN Ferredoxin--nitrite reductase, chloroplastic OS=Betula pendula GN=NIR1 PE=2 SV=1//0
Cla013086	4377.94	2699.77	0.69742	0.0008168	0.0094659	up	sp|O23193|CBSX1_ARATH CBS domain-containing protein CBSX1, chloroplastic OS=Arabidopsis thaliana GN=CBSX1 PE=1 SV=2//4.69262e-95
Cla013089	181.894	56.8624	1.6776	3.8627e-06	9.647e-05	up	sp|Q8W3M4|Y4744_ARATH Uncharacterized protein At4g06744 OS=Arabidopsis thaliana GN=At4g06744 PE=2 SV=1//9.34414e-106
Cla013094	3183.99	2119.4	0.58718	0.0045755	0.037613	up	sp|O49485|SERA1_ARATH D-3-phosphoglycerate dehydrogenase 1, chloroplastic OS=Arabidopsis thaliana GN=PGDH1 PE=1 SV=1//0
Cla013095	247.166	116.812	1.0813	0.00081239	0.0094204	up	sp|Q94C77|RPKL_ARATH Receptor protein kinase-like protein At4g34220 OS=Arabidopsis thaliana GN=At4g34220 PE=2 SV=1//0
Cla013099	5208.12	2132.28	1.2884	0.0024125	0.023042	up	sp|Q9FDW1|MYB44_ARATH Transcription factor MYB44 OS=Arabidopsis thaliana GN=MYB44 PE=2 SV=1//3.70852e-59
Cla013117	3708.28	2006.26	0.88624	1.3984e-05	0.00029844	up	sp|Q94EG6|Y5224_ARATH Uncharacterized protein At5g02240 OS=Arabidopsis thaliana GN=At5g02240 PE=1 SV=1//4.56798e-07
Cla013121	5845.48	3929.84	0.57285	0.0033276	0.029528	up	sp|Q8L8W0|ALIS5_ARATH ALA-interacting subunit 5 OS=Arabidopsis thaliana GN=ALIS5 PE=1 SV=1//1.63694e-156
Cla013153	5318.46	2826.58	0.91195	1.1758e-05	0.00025651	up	sp|Q9SXJ6|CLPP3_ARATH ATP-dependent Clp protease proteolytic subunit 3, chloroplastic OS=Arabidopsis thaliana GN=CLPP3 PE=1 SV=1//1.28761e-148
Cla013158	1179.3	267.639	2.1396	6.2288e-18	1.0834e-15	up	sp|Q84K34|SIL10_ARATH E3 ubiquitin-protein ligase SINA-like 10 OS=Arabidopsis thaliana GN=At5g37930 PE=2 SV=1//3.73346e-58
Cla013165	7854.16	4440.09	0.82287	4.3554e-05	0.0008038	up	sp|Q9C550|LEU12_ARATH 2-isopropylmalate synthase 2, chloroplastic OS=Arabidopsis thaliana GN=IPMS2 PE=1 SV=1//0
Cla013188	268.237	98.8017	1.4409	1.1245e-05	0.00024779	up	sp|Q9C8Y1|CML23_ARATH Probable calcium-binding protein CML23 OS=Arabidopsis thaliana GN=CML23 PE=2 SV=1//2.14295e-48
Cla013190	2737.51	984.358	1.4756	0.00038096	0.0050764	up	sp|Q9LVH4|CAR4_ARATH Protein C2-DOMAIN ABA-RELATED 4 OS=Arabidopsis thaliana GN=CAR4 PE=1 SV=1//1.78497e-83
Cla013212	5364.77	3309.9	0.69673	0.0052297	0.041497	up	sp|Q42899|GLNA1_LOTJA Glutamine synthetase cytosolic isozyme OS=Lotus japonicus GN=GLN1 PE=2 SV=2//0
Cla013217	886.788	579.097	0.61479	0.0048445	0.03912	up	sp|Q9Y4D2|DGLA_HUMAN Sn1-specific diacylglycerol lipase alpha OS=Homo sapiens GN=DAGLA PE=1 SV=3//1.58504e-08
Cla013218	1798.94	1114	0.6914	0.0010032	0.011191	up	sp|Q6NQ72|THO4D_ARATH THO complex subunit 4D OS=Arabidopsis thaliana GN=ALY4 PE=1 SV=1//2.28908e-62
Cla013231	649.57	195.024	1.7358	0.00044059	0.0057387	up	-//-
Cla013240	2474.69	959.247	1.3673	1.7771e-10	9.8947e-09	up	-//-
Cla013241	1323.33	427.164	1.6313	5.9611e-12	4.2298e-10	up	sp|P82412|RRP3_SPIOL 30S ribosomal protein 3, chloroplastic OS=Spinacia oleracea GN=PSRP3 PE=1 SV=1//1.21587e-62
Cla013258	1639.24	239.592	2.7744	2.2116e-08	8.5907e-07	up	sp|O48963|PHOT1_ARATH Phototropin-1 OS=Arabidopsis thaliana GN=PHOT1 PE=1 SV=1//0
Cla013294	187.196	18.8643	3.3108	5.4206e-14	5.002e-12	up	-//-
Cla013307	579.036	192.02	1.5924	5.9115e-10	2.9641e-08	up	sp|F4HSD5|TRM32_ARATH Protein TRM32 OS=Arabidopsis thaliana GN=TRM32 PE=2 SV=1//5.3513e-12
Cla013311	547.23	333.256	0.71552	0.0032357	0.028934	up	sp|Q06548|APK1A_ARATH Protein kinase APK1A, chloroplastic OS=Arabidopsis thaliana GN=APK1A PE=2 SV=1//8.00743e-177
Cla013314	278.295	52.7181	2.4002	6.0178e-13	4.8278e-11	up	sp|O48818|EXPA4_ARATH Expansin-A4 OS=Arabidopsis thaliana GN=EXPA4 PE=1 SV=1//8.42738e-165
Cla013322	649.321	357.525	0.86089	0.00032228	0.0044173	up	sp|Q9LTH4|PCLL_ARATH Transcription factor BOA OS=Arabidopsis thaliana GN=BOA PE=2 SV=1//1.68281e-48
Cla013329	3018.64	1168.83	1.3688	4.0718e-06	0.00010131	up	sp|Q8SKU2|TIC62_PEA Protein TIC 62, chloroplastic OS=Pisum sativum GN=TIC62 PE=1 SV=2//2.84849e-13
Cla013339	485.872	284.787	0.77069	0.0026841	0.025063	up	sp|Q9LXU9|IRKI_ARATH IRK-interacting protein OS=Arabidopsis thaliana GN=IRKI PE=1 SV=1//1.1396e-09
Cla013342	3386.68	1863.89	0.86155	4.4257e-05	0.00081448	up	sp|Q5R833|ACO13_PONAB Acyl-coenzyme A thioesterase 13 OS=Pongo abelii GN=ACOT13 PE=2 SV=1//5.56481e-12
Cla013344	738.603	326.984	1.1756	9.7555e-07	2.751e-05	up	sp|Q9M390|PTR1_ARATH Protein NRT1/ PTR FAMILY 8.1 OS=Arabidopsis thaliana GN=NPF8.1 PE=1 SV=1//0
Cla013346	1797.13	557.151	1.6896	8.899e-14	7.9144e-12	up	sp|O80361|RK4_TOBAC 50S ribosomal protein L4, chloroplastic OS=Nicotiana tabacum GN=RPL4 PE=2 SV=1//1.03745e-121
Cla013352	975.165	258.122	1.9176	3.1393e-15	3.651e-13	up	-//-
Cla013378	3048.38	1643.28	0.89146	2.1654e-05	0.00044058	up	sp|Q0WNN7|PP176_ARATH Pentatricopeptide repeat-containing protein At2g30100, chloroplastic OS=Arabidopsis thaliana GN=At2g30100 PE=2 SV=2//0
Cla013386	328.701	174.461	0.91387	0.0050395	0.040365	up	sp|O64732|U87A1_ARATH UDP-glycosyltransferase 87A1 OS=Arabidopsis thaliana GN=UGT87A1 PE=2 SV=1//4.27156e-105
Cla013424	3035.72	1350.3	1.1688	6.3424e-05	0.0011061	up	sp|O04682|PTI6_SOLLC Pathogenesis-related genes transcriptional activator PTI6 OS=Solanum lycopersicum GN=PTI6 PE=2 SV=1//1.68896e-23
Cla013429	3076.06	886.704	1.7946	1.7639e-16	2.4588e-14	up	sp|P51204|YCF54_PORPU Uncharacterized protein ycf54 OS=Porphyra purpurea GN=ycf54 PE=3 SV=1//7.40473e-15
Cla013434	4878.56	1778	1.4562	4.0266e-12	2.9097e-10	up	sp|O32107|YUID_BACSU Uncharacterized membrane protein YuiD OS=Bacillus subtilis (strain 168) GN=yuiD PE=4 SV=1//9.29308e-06
Cla013437	1326.41	595.592	1.1551	1.5135e-07	5.1024e-06	up	sp|Q9LS40|ASPG1_ARATH Protein ASPARTIC PROTEASE IN GUARD CELL 1 OS=Arabidopsis thaliana GN=ASPG1 PE=1 SV=1//5.81997e-31
Cla013455	6377.39	3937.41	0.69572	0.00091472	0.010368	up	sp|Q42961|PGKH_TOBAC Phosphoglycerate kinase, chloroplastic OS=Nicotiana tabacum PE=2 SV=1//0
Cla013483	1776.48	391.258	2.1828	1.4579e-08	5.848e-07	up	sp|P07369|CB2G_SOLLC Chlorophyll a-b binding protein 3C, chloroplastic OS=Solanum lycopersicum GN=CAB3C PE=3 SV=1//2.13732e-176
Cla013492	40.0211	6.80975	2.5551	0.003948	0.033694	up	sp|Q682H0|HA22F_ARATH HVA22-like protein f OS=Arabidopsis thaliana GN=HVA22F PE=2 SV=1//1.0915e-69
Cla013516	16631.2	5735.05	1.536	3.3408e-11	2.0979e-09	up	sp|P31237|ACCO_ACTDE 1-aminocyclopropane-1-carboxylate oxidase OS=Actinidia deliciosa GN=ACO PE=2 SV=1//1.63722e-178
Cla013528	6812.22	3763.26	0.85614	4.7279e-05	0.00085884	up	sp|Q9SIN2|TBL39_ARATH Protein trichome birefringence-like 39 OS=Arabidopsis thaliana GN=TBL39 PE=2 SV=1//4.33751e-175
Cla013529	4381.77	2932.89	0.57919	0.0043585	0.036268	up	-//-
Cla013531	39.2138	2.32956	4.0732	8.189e-05	0.0013722	up	sp|P67055|MENG_LISMO Demethylmenaquinone methyltransferase OS=Listeria monocytogenes serovar 1/2a (strain ATCC BAA-679 / EGD-e) GN=menG PE=3 SV=1//3.07018e-09
Cla013540	2300.23	1362.57	0.75545	0.0016929	0.017394	up	sp|Q05609|CTR1_ARATH Serine/threonine-protein kinase CTR1 OS=Arabidopsis thaliana GN=CTR1 PE=1 SV=1//2.85399e-64
Cla013541	52.7605	5.0781	3.3771	4.534e-05	0.00082976	up	sp|Q9S7R3|LSH10_ARATH Protein LIGHT-DEPENDENT SHORT HYPOCOTYLS 10 OS=Arabidopsis thaliana GN=LSH10 PE=1 SV=1//1.54711e-78
Cla013542	1722.66	875.875	0.97584	1.2926e-05	0.00027942	up	-//-
Cla013543	2627.19	1555.19	0.75643	0.00035495	0.0047785	up	-//-
Cla013545	440.918	228.38	0.94907	0.00066117	0.0079336	up	-//-
Cla013565	5955.59	3689.4	0.69086	0.00036456	0.0048744	up	sp|Q6R567|RMA1_CAPAN E3 ubiquitin-protein ligase RMA1H1 OS=Capsicum annuum GN=RMA1H1 PE=1 SV=1//1.23637e-54
Cla013597	2057.1	1334.4	0.62442	0.0030575	0.027694	up	sp|Q9C5E5|DGK5_ARATH Diacylglycerol kinase 5 OS=Arabidopsis thaliana GN=DGK5 PE=2 SV=1//0
Cla013598	108.557	15.5501	2.8034	1.8706e-08	7.3534e-07	up	sp|Q9ZWB4|3AT1_ARATH Coumaroyl-CoA:anthocyanidin 3-O-glucoside-6&apos;&apos;-O-coumaroyltransferase 1 OS=Arabidopsis thaliana GN=3AT1 PE=1 SV=1//3.70339e-81
Cla013599	183.02	47.7807	1.9375	2.0803e-07	6.7697e-06	up	-//-
Cla013600	412.351	188.959	1.1258	7.3249e-05	0.00125	up	sp|O65220|CPY28_ARATH Peptidyl-prolyl cis-trans isomerase CYP28, chloroplastic OS=Arabidopsis thaliana GN=CYP28 PE=1 SV=1//9.2068e-102
Cla013602	93.493	32.9836	1.5031	0.00091776	0.010397	up	-//-
Cla013606	2420.56	1271.88	0.92837	1.2893e-05	0.00027939	up	sp|Q0WPT7|Y2104_ARATH Uncharacterized methyltransferase At2g41040, chloroplastic OS=Arabidopsis thaliana GN=At2g41040 PE=2 SV=1//1.18149e-151
Cla013624	1899.59	763.863	1.3143	1.7565e-09	8.2988e-08	up	-//-
Cla013625	4855.17	2137.74	1.1834	8.3331e-09	3.4848e-07	up	sp|A1L4X7|AHL14_ARATH AT-hook motif nuclear-localized protein 14 OS=Arabidopsis thaliana GN=AHL14 PE=1 SV=1//2.17838e-53
Cla013639	884.722	354.668	1.3188	5.2093e-08	1.8926e-06	up	-//-
Cla013657	1357.14	875.526	0.63235	0.0056341	0.044014	up	sp|Q9FIJ7|KAD2_ARATH Adenylate kinase 2, chloroplastic OS=Arabidopsis thaliana GN=At5g47840 PE=1 SV=1//8.95606e-106
Cla013664	274.427	137.668	0.99523	0.0010772	0.011821	up	sp|A8MR21|IP5PA_ARATH Type I inositol polyphosphate 5-phosphatase 10 OS=Arabidopsis thaliana GN=IP5P10 PE=2 SV=1//0
Cla013674	84.9674	27.9157	1.6058	0.0014814	0.01557	up	sp|Q8LEU3|NOL_ARATH Chlorophyll(ide) b reductase NOL, chloroplastic OS=Arabidopsis thaliana GN=NOL PE=1 SV=1//7.62372e-78
Cla013694	14801	7561.7	0.96891	2.4304e-06	6.3608e-05	up	sp|P27788|FER3_MAIZE Ferredoxin-3, chloroplastic OS=Zea mays GN=FDX3 PE=2 SV=1//3.24592e-66
Cla013697	41400.7	14922.8	1.4721	3.3367e-13	2.8269e-11	up	sp|Q9LZ23|ACR12_ARATH ACT domain-containing protein ACR12 OS=Arabidopsis thaliana GN=ACR12 PE=2 SV=1//2.98434e-111
Cla013721	7388.15	4246.55	0.79892	0.0020387	0.020167	up	sp|Q2N2K1|PHYK1_SOYBN Probable phytol kinase 1, chloroplastic OS=Glycine max PE=2 SV=1//8.04736e-105
Cla013741	218.408	100.276	1.1231	0.0008521	0.009777	up	sp|P51281|YCF45_PORPU Uncharacterized protein ycf45 OS=Porphyra purpurea GN=ycf45 PE=3 SV=1//1.119e-145
Cla013748	290.326	166.145	0.80524	0.0039775	0.033902	up	sp|Q9SV36|ARK1_ARATH Armadillo repeat-containing kinesin-like protein 1 OS=Arabidopsis thaliana GN=ARK1 PE=1 SV=2//0
Cla013749	522.458	253.287	1.0445	7.5957e-05	0.0012905	up	sp|P35159|RLUB_BACSU Ribosomal large subunit pseudouridine synthase B OS=Bacillus subtilis (strain 168) GN=rluB PE=1 SV=2//1.58454e-34
Cla013809	1363.93	739.646	0.88286	5.4684e-05	0.00097268	up	sp|Q9SRE0|5FCLL_ARATH 5-formyltetrahydrofolate cyclo-ligase-like protein COG0212 OS=Arabidopsis thaliana GN=COG0212 PE=2 SV=1//1.88882e-143
Cla013818	37.8046	0	Inf	0.00030227	0.004178	up	sp|Q6NMB7|WTR7_ARATH WAT1-related protein At1g43650 OS=Arabidopsis thaliana GN=At1g43650 PE=2 SV=1//8.50135e-104
Cla013826	10457.9	887.056	3.5594	3.6004e-56	1.0109e-52	up	sp|P27524|CB4A_SOLLC Chlorophyll a-b binding protein CP24 10A, chloroplastic OS=Solanum lycopersicum GN=CAP10A PE=3 SV=1//1.06437e-148
Cla013830	1209	675.814	0.83911	0.00018541	0.0027756	up	sp|Q2MHE4|HT1_ARATH Serine/threonine-protein kinase HT1 OS=Arabidopsis thaliana GN=HT1 PE=1 SV=1//1.40774e-62
Cla013854	1512.98	758.189	0.99676	5.2506e-06	0.0001271	up	sp|Q6NLQ3|GLTP2_ARATH Glycolipid transfer protein 2 OS=Arabidopsis thaliana GN=GLTP2 PE=2 SV=1//6.60017e-78
Cla013870	430.384	112.212	1.9394	7.3237e-11	4.3358e-09	up	sp|P07591|TRXM_SPIOL Thioredoxin M-type, chloroplastic OS=Spinacia oleracea PE=1 SV=2//2.88756e-54
Cla013908	2562.29	1289.45	0.99068	3.5474e-06	8.9275e-05	up	sp|Q9C5W3|NADK2_ARATH NAD kinase 2, chloroplastic OS=Arabidopsis thaliana GN=NADK2 PE=1 SV=1//0
Cla013932	951.017	539.76	0.81715	0.00080441	0.0093333	up	-//-
Cla013939	2145.33	204.489	3.3911	5.7142e-41	7.0196e-38	up	sp|Q9MBA1|CAO_ARATH Chlorophyllide a oxygenase, chloroplastic OS=Arabidopsis thaliana GN=CAO PE=1 SV=1//0
Cla013951	2243.35	437.057	2.3598	5.1398e-19	1.0204e-16	up	sp|Q9SUF1|WTR31_ARATH WAT1-related protein At4g08290 OS=Arabidopsis thaliana GN=At4g08290 PE=2 SV=1//7.15373e-150
Cla013969	1670.34	935.613	0.83615	8.0837e-05	0.001358	up	sp|Q94B08|GCP1_ARATH Germination-specific cysteine protease 1 OS=Arabidopsis thaliana GN=GCP1 PE=2 SV=2//5.53965e-159
Cla014004	177.927	89.2685	0.99506	0.0040892	0.034622	up	-//-
Cla014005	23711.2	10365.3	1.1938	5.1081e-09	2.2017e-07	up	sp|O65351|SBT17_ARATH Subtilisin-like protease SBT1.7 OS=Arabidopsis thaliana GN=SBT1.7 PE=1 SV=1//0
Cla014011	666.054	397.426	0.74495	0.0029053	0.026671	up	sp|Q5L0Q3|RNC_GEOKA Ribonuclease 3 OS=Geobacillus kaustophilus (strain HTA426) GN=rnc PE=3 SV=1//1.23377e-09
Cla014013	1439.08	869.973	0.7261	0.00090248	0.010247	up	sp|Q43873|PER73_ARATH Peroxidase 73 OS=Arabidopsis thaliana GN=PER73 PE=1 SV=1//4.88951e-176
Cla014015	1589.69	763.357	1.0583	0.0022877	0.022129	up	sp|Q9FN11|LBD37_ARATH LOB domain-containing protein 37 OS=Arabidopsis thaliana GN=LBD37 PE=2 SV=1//1.38948e-75
Cla014045	821.46	74.8078	3.4569	7.2744e-15	7.8994e-13	up	sp|Q9FHP1|ACR1_ARATH ACT domain-containing protein ACR1 OS=Arabidopsis thaliana GN=ACR1 PE=2 SV=1//4.79655e-175
Cla014050	160.736	74.4352	1.1106	0.0019067	0.019072	up	sp|O81001|GRF1_ARATH Growth-regulating factor 1 OS=Arabidopsis thaliana GN=GRF1 PE=1 SV=1//1.01653e-106
Cla014068	8565.4	4149.88	1.0454	2.4004e-07	7.6841e-06	up	sp|P19446|MDHG_CITLA Malate dehydrogenase, glyoxysomal OS=Citrullus lanatus PE=1 SV=1//0
Cla014070	364.321	116.494	1.645	1.3348e-07	4.5469e-06	up	sp|O49545|BAME1_ARATH Leucine-rich repeat receptor-like serine/threonine-protein kinase BAM1 OS=Arabidopsis thaliana GN=BAM1 PE=1 SV=1//0
Cla014071	683.238	318.118	1.1028	6.3159e-05	0.0011035	up	sp|Q9T071|HXKL2_ARATH Probable hexokinase-like 2 protein OS=Arabidopsis thaliana GN=At4g37840 PE=3 SV=1//0
Cla014096	230.373	31.465	2.8721	0.00057022	0.00704	up	sp|Q940V3|U91A1_ARATH UDP-glycosyltransferase 91A1 OS=Arabidopsis thaliana GN=UGT91A1 PE=2 SV=1//2.51109e-165
Cla014102	1670.09	976.463	0.77429	0.0004001	0.0052956	up	-//-
Cla014127	3977.72	1975.43	1.0098	2.3586e-06	6.1976e-05	up	sp|P46668|ATHB6_ARATH Homeobox-leucine zipper protein ATHB-6 OS=Arabidopsis thaliana GN=ATHB-6 PE=1 SV=1//9.67767e-66
Cla014147	93.4661	24.0388	1.9591	3.8595e-05	0.0007273	up	-//-
Cla014165	73.0096	18.0603	2.0153	0.0002265	0.0032879	up	sp|Q9SCY3|PNSL4_ARATH Photosynthetic NDH subunit of lumenal location 4, chloroplastic OS=Arabidopsis thaliana GN=PNSL4 PE=1 SV=1//1.19393e-84
Cla014180	265.233	22.5632	3.5552	4.7176e-08	1.7319e-06	up	sp|H2DH18|C7A12_PANGI Cytochrome P450 CYP736A12 OS=Panax ginseng PE=2 SV=1//5.39378e-176
Cla014206	2510.06	734.919	1.7721	3.8153e-16	5.1363e-14	up	-//-
Cla014217	11456.9	7118.64	0.68654	0.00054803	0.0068335	up	sp|Q6Z2G9|TLP5_ORYSJ Tubby-like F-box protein 5 OS=Oryza sativa subsp. japonica GN=TULP5 PE=2 SV=1//1.96697e-152
Cla014255	146.242	32.5432	2.1679	2.8859e-07	9.09e-06	up	sp|Q43636|TRXH_RICCO Thioredoxin H-type OS=Ricinus communis PE=3 SV=1//8.5865e-61
Cla014274	202.413	48.826	2.0516	3.536e-08	1.3238e-06	up	sp|P33081|AX15A_SOYBN Auxin-induced protein 15A OS=Glycine max PE=2 SV=1//5.60442e-22
Cla014278	411.714	201.102	1.0337	0.000124	0.0019703	up	-//-
Cla014291	49.6436	9.70831	2.3543	0.0010297	0.011405	up	sp|P50699|TLPH_ARATH Thaumatin-like protein OS=Arabidopsis thaliana GN=At1g18250 PE=2 SV=2//1.59498e-64
Cla014315	277.476	83.783	1.7276	2.2668e-07	7.3041e-06	up	sp|Q9LX20|ASPL1_ARATH Aspartic proteinase-like protein 1 OS=Arabidopsis thaliana GN=At5g10080 PE=1 SV=1//5.49849e-73
Cla014321	32632.6	21108.1	0.62852	0.002423	0.023102	up	sp|Q42560|ACO1_ARATH Aconitate hydratase 1 OS=Arabidopsis thaliana GN=ACO1 PE=1 SV=2//0
Cla014327	908.238	169.551	2.4214	1.4167e-05	0.00030167	up	sp|Q38853|STR15_ARATH Rhodanese-like domain-containing protein 15, chloroplastic OS=Arabidopsis thaliana GN=STR15 PE=2 SV=1//6.14259e-54
Cla014328	1183.27	730.024	0.69677	0.0023982	0.02294	up	sp|Q8L540|LTO1_ARATH Thiol-disulfide oxidoreductase LTO1 OS=Arabidopsis thaliana GN=LTO1 PE=1 SV=1//3.88239e-124
Cla014344	110.638	43.8479	1.3353	0.0026424	0.024767	up	sp|Q9SEY5|AAE2_ARATH Probable acyl-activating enzyme 2 OS=Arabidopsis thaliana GN=AAE2 PE=2 SV=1//0
Cla014384	17238.6	11508.7	0.58291	0.0022133	0.021536	up	sp|Q9FIK8|CAR11_ARATH Protein C2-DOMAIN ABA-RELATED 11 OS=Arabidopsis thaliana GN=CAR11 PE=2 SV=1//2.62192e-79
Cla014389	47959.2	23865.9	1.0069	5.1414e-07	1.5288e-05	up	-//-
Cla014410	169.945	70.9105	1.261	0.0037215	0.032251	up	-//-
Cla014413	4103.31	2367.77	0.79326	0.00013367	0.0020969	up	sp|Q9FZ45|Y1686_ARATH Uncharacterized membrane protein At1g16860 OS=Arabidopsis thaliana GN=At1g16860 PE=1 SV=1//2.66309e-91
Cla014416	97362.6	34211.6	1.5089	2.7318e-13	2.3447e-11	up	sp|Q96398|CHRC_CUCSA Chromoplast-specific carotenoid-associated protein, chromoplast OS=Cucumis sativus GN=CHRC PE=1 SV=1//0
Cla014426	90.4472	30.5897	1.564	0.0014219	0.015026	up	-//-
Cla014449	1545.24	880.106	0.81208	0.0001591	0.0024449	up	sp|Q6Z1D5|ATG8C_ORYSJ Autophagy-related protein 8C OS=Oryza sativa subsp. japonica GN=ATG8C PE=2 SV=1//1.07409e-69
Cla014452	957.365	364.792	1.392	4.2634e-05	0.00078831	up	sp|P29790|ATPG_TOBAC ATP synthase gamma chain, chloroplastic OS=Nicotiana tabacum GN=ATPC PE=1 SV=1//0
Cla014488	39.2926	2.37055	4.051	9.0722e-05	0.0015048	up	-//-
Cla014492	2660.78	1724.54	0.62564	0.0041428	0.034956	up	sp|E9L7A5|PAT_PETHY Bifunctional aspartate aminotransferase and glutamate/aspartate-prephenate aminotransferase OS=Petunia hybrida PE=1 SV=1//0
Cla014572	564.299	295.361	0.93398	0.0056798	0.044195	up	sp|P24068|OCS1_MAIZE Ocs element-binding factor 1 OS=Zea mays GN=OBF1 PE=2 SV=2//1.16978e-19
Cla014596	1360.11	523.886	1.3764	2.5617e-08	9.8148e-07	up	sp|Q40784|AAPC_CENCI Putative glucose-6-phosphate 1-epimerase OS=Cenchrus ciliaris PE=2 SV=1//2.77562e-36
Cla014602	711.495	288.632	1.3016	3.0399e-07	9.5424e-06	up	sp|G5DBJ0|CPP1_NICBE Protein CHAPERONE-LIKE PROTEIN OF POR1, chloroplastic OS=Nicotiana benthamiana GN=CPP1 PE=1 SV=1//5.67627e-14
Cla014612	14219.9	7392.47	0.94378	1.8327e-06	4.9143e-05	up	sp|Q8R1R3|STAR7_MOUSE StAR-related lipid transfer protein 7, mitochondrial OS=Mus musculus GN=Stard7 PE=2 SV=2//3.25277e-10
Cla014617	67.3357	20.2184	1.7357	0.0014431	0.015206	up	-//-
Cla014624	37.8405	1.16103	5.0265	0.0036882	0.032005	up	-//-
Cla014625	1681.13	1096.04	0.61713	0.0055558	0.043558	up	sp|Q9MAP7|SBT35_ARATH Subtilisin-like protease SBT3.5 OS=Arabidopsis thaliana GN=SBT3.5 PE=1 SV=1//0
Cla014636	8316.61	2926.34	1.5069	1.383e-13	1.2245e-11	up	sp|P44004|Y488_HAEIN Uncharacterized protein HI_0488 OS=Haemophilus influenzae (strain ATCC 51907 / DSM 11121 / KW20 / Rd) GN=HI_0488 PE=3 SV=1//7.86925e-13
Cla014654	3453.77	1426.79	1.2754	2.7434e-09	1.2453e-07	up	sp|Q9CAK8|ISPF_ARATH 2-C-methyl-D-erythritol 2,4-cyclodiphosphate synthase, chloroplastic OS=Arabidopsis thaliana GN=ISPF PE=1 SV=1//8.25861e-109
Cla014688	1964.85	1028.33	0.93411	1.325e-05	0.00028556	up	sp|Q8TB22|SPT20_HUMAN Spermatogenesis-associated protein 20 OS=Homo sapiens GN=SPATA20 PE=2 SV=3//0
Cla014706	636.272	227.595	1.4832	9.7347e-09	4.0623e-07	up	sp|O82261|DEGP2_ARATH Protease Do-like 2, chloroplastic OS=Arabidopsis thaliana GN=DEGP2 PE=1 SV=2//0
Cla014720	577.617	351.141	0.71806	0.0027491	0.025512	up	sp|Q02357|ANK1_MOUSE Ankyrin-1 OS=Mus musculus GN=Ank1 PE=1 SV=2//1.00395e-06
Cla014724	7354.26	4931.28	0.57662	0.0051321	0.040872	up	sp|O24467|LE14B_PRUAR LEC14B homolog OS=Prunus armeniaca PE=2 SV=1//0
Cla014725	49.9742	11.0335	2.1793	0.00081924	0.009483	up	sp|Q9SCT4|IMK2_ARATH Probably inactive leucine-rich repeat receptor-like protein kinase IMK2 OS=Arabidopsis thaliana GN=IMK2 PE=1 SV=1//1.82428e-30
Cla014731	468.96	266.991	0.81267	0.001344	0.014341	up	-//-
Cla014770	206.252	54.2486	1.9268	6.8679e-05	0.0011851	up	-//-
Cla014793	110.047	47.2702	1.2191	0.005472	0.043072	up	-//-
Cla014795	553.312	227.164	1.2844	8.7972e-07	2.4987e-05	up	sp|Q9ZWA6|IDD3_ARATH Zinc finger protein MAGPIE OS=Arabidopsis thaliana GN=MGP PE=1 SV=1//2.50943e-105
Cla014807	1205.18	754.822	0.67504	0.0039672	0.033843	up	sp|Q8GXH3|OSB2_ARATH Protein OSB2, chloroplastic OS=Arabidopsis thaliana GN=OSB2 PE=1 SV=2//1.09334e-15
Cla014808	1927.22	106.058	4.1836	3.8265e-32	2.507e-29	up	sp|O24542|AX22D_VIGRR Auxin-induced protein 22D OS=Vigna radiata var. radiata GN=AUX22D PE=2 SV=1//1.92974e-87
Cla014809	2047.77	95.9014	4.4164	8.9228e-15	9.5314e-13	up	sp|P13089|AUX28_SOYBN Auxin-induced protein AUX28 OS=Glycine max GN=AUX28 PE=2 SV=1//1.37642e-92
Cla014814	4224.84	1851.47	1.1902	1.0945e-08	4.5287e-07	up	sp|P80461|GSHRP_TOBAC Glutathione reductase, chloroplastic (Fragment) OS=Nicotiana tabacum GN=GOR PE=1 SV=1//0
Cla014815	4376.08	728.864	2.5859	1.5653e-17	2.6074e-15	up	sp|Q39194|PSBW_ARATH Photosystem II reaction center W protein, chloroplastic OS=Arabidopsis thaliana GN=PSBW PE=1 SV=2//1.14807e-19
Cla014827	14681.6	9931.33	0.56395	0.0035827	0.031255	up	sp|Q40062|IDS3_HORVU 2&apos;-deoxymugineic-acid 2&apos;-dioxygenase OS=Hordeum vulgare GN=IDS3 PE=1 SV=3//1.64464e-42
Cla014868	359.618	21.8403	4.0414	1.9349e-08	7.5909e-07	up	sp|Q8W453|DIRL1_ARATH Putative lipid-transfer protein DIR1 OS=Arabidopsis thaliana GN=DIR1 PE=1 SV=1//1.23042e-21
Cla014870	946.512	220.554	2.1015	6.9357e-17	1.0173e-14	up	sp|Q8RXE8|BASS3_ARATH Probable sodium/metabolite cotransporter BASS3, chloroplastic OS=Arabidopsis thaliana GN=BASS3 PE=2 SV=1//4.32048e-165
Cla014871	2735.19	811.553	1.7529	2.6265e-15	3.1287e-13	up	sp|O50064|FIMB2_ARATH Fimbrin-2 OS=Arabidopsis thaliana GN=FIM2 PE=2 SV=1//0
Cla014872	1412.15	759.682	0.89443	9.3699e-05	0.0015437	up	-//-
Cla014873	1002.03	590.35	0.76329	0.00068718	0.0081659	up	sp|Q941D5|VPS2C_ARATH Vacuolar protein sorting-associated protein 2 homolog 3 OS=Arabidopsis thaliana GN=VPS2.3 PE=2 SV=1//1.0222e-39
Cla014886	438.845	170.134	1.367	1.6699e-06	4.5199e-05	up	sp|Q56XR7|STR4A_ARATH Rhodanese-like domain-containing protein 4A, chloroplastic OS=Arabidopsis thaliana GN=STR4A PE=2 SV=1//4.54071e-18
Cla014888	451.472	202.683	1.1554	4.1261e-05	0.00076581	up	sp|Q56XR7|STR4A_ARATH Rhodanese-like domain-containing protein 4A, chloroplastic OS=Arabidopsis thaliana GN=STR4A PE=2 SV=1//1.15613e-51
Cla014899	333.73	136.418	1.2906	8.1208e-06	0.00018717	up	sp|P19892|RAA5E_ARATH Ras-related protein RABA5e OS=Arabidopsis thaliana GN=RABA5E PE=2 SV=1//2.8495e-104
Cla014900	249.511	83.4274	1.5805	1.4751e-05	0.00031345	up	sp|Q9SW95|SYNC2_ARATH Asparagine--tRNA ligase, cytoplasmic 2 OS=Arabidopsis thaliana GN=SYNC2 PE=1 SV=2//0
Cla014904	698.084	323.659	1.1089	0.00044627	0.0057935	up	sp|Q9SRT3|CSLC6_ARATH Probable xyloglucan glycosyltransferase 6 OS=Arabidopsis thaliana GN=CSLC6 PE=1 SV=1//0
Cla014905	5249.96	2444.47	1.1028	1.762e-07	5.8305e-06	up	sp|Q9SRT2|BH062_ARATH Transcription factor bHLH62 OS=Arabidopsis thaliana GN=BHLH62 PE=2 SV=1//3.03365e-90
Cla014915	1925.07	1218.39	0.65994	0.0026035	0.024484	up	-//-
Cla014925	2275.61	1429.81	0.67043	0.0015463	0.016149	up	-//-
Cla014931	116.912	18.0992	2.6914	1.4727e-07	4.9907e-06	up	sp|Q9LJB4|5MAT_ARATH Malonyl-CoA:anthocyanidin 5-O-glucoside-6&apos;&apos;-O-malonyltransferase OS=Arabidopsis thaliana GN=5MAT PE=1 SV=1//3.14502e-64
Cla014953	5760.88	3439.18	0.74423	0.00013501	0.0021144	up	sp|Q0WNW4|MYOB3_ARATH Myosin-binding protein 3 OS=Arabidopsis thaliana GN=MYOB3 PE=1 SV=1//5.52613e-09
Cla014954	70.3546	10.3946	2.7588	1.0378e-05	0.00023127	up	sp|P33183|NIGB_SAMNI Nigrin b OS=Sambucus nigra PE=1 SV=2//2.79962e-87
Cla014965	1977.04	1269.76	0.63879	0.0045786	0.037622	up	sp|Q8LDV3|Y4320_ARATH Uncharacterized protein At4g13200, chloroplastic OS=Arabidopsis thaliana GN=At4g13200 PE=2 SV=2//5.17684e-22
Cla014971	843.348	480.794	0.81071	0.0010695	0.011756	up	sp|Q9M8Z7|U80A2_ARATH Sterol 3-beta-glucosyltransferase UGT80A2 OS=Arabidopsis thaliana GN=UGT80A2 PE=1 SV=1//0
Cla014991	1140.05	488.731	1.222	2.9793e-06	7.6148e-05	up	sp|Q8GZM7|PIF1_ARATH Transcription factor PIF1 OS=Arabidopsis thaliana GN=PIF1 PE=1 SV=1//8.10939e-60
Cla015008	728.244	367.801	0.9855	6.2806e-05	0.0011012	up	sp|Q689D6|RPD1_ARATH Protein ROOT PRIMORDIUM DEFECTIVE 1 OS=Arabidopsis thaliana GN=RPD1 PE=1 SV=1//3.23226e-37
Cla015009	8561.05	4828	0.82636	3.8919e-05	0.00073132	up	sp|Q9FGM1|PYL8_ARATH Abscisic acid receptor PYL8 OS=Arabidopsis thaliana GN=PYL8 PE=1 SV=1//8.56962e-92
Cla015013	1545.15	951.451	0.69954	0.0016907	0.017381	up	sp|Q9FFQ1|RH31_ARATH DEAD-box ATP-dependent RNA helicase 31 OS=Arabidopsis thaliana GN=RH31 PE=2 SV=2//0
Cla015014	352.91	12.9334	4.7701	1.7918e-30	1.0062e-27	up	sp|Q84JH9|TBL25_ARATH Protein trichome birefringence-like 25 OS=Arabidopsis thaliana GN=TBL25 PE=2 SV=1//1.80902e-161
Cla015022	8163.84	3358.04	1.2816	0.00088322	0.010058	up	-//-
Cla015037	3315.93	2123.49	0.64298	0.0015654	0.016314	up	sp|Q9LHP4|RCH2_ARATH Receptor-like protein kinase 2 OS=Arabidopsis thaliana GN=RCH2 PE=1 SV=1//0
Cla015051	5044.42	1470.62	1.7783	5.7965e-07	1.7107e-05	up	sp|O82245|TSPO_ARATH Translocator protein homolog OS=Arabidopsis thaliana GN=TSPO PE=1 SV=1//5.08021e-27
Cla015083	609.675	322.202	0.92007	0.00035589	0.0047879	up	sp|Q8RWM7|CCB3_ARATH Protein COFACTOR ASSEMBLY OF COMPLEX C SUBUNIT B CCB3, chloroplastic OS=Arabidopsis thaliana GN=CCB3 PE=1 SV=1//1.17921e-51
Cla015092	81063.9	31836.1	1.3484	0.00058391	0.0071731	up	sp|P32292|ARG2_VIGRR Indole-3-acetic acid-induced protein ARG2 OS=Vigna radiata var. radiata GN=ARG2 PE=2 SV=1//9.21381e-24
Cla015103	1105.46	423.219	1.3852	1.8402e-09	8.6115e-08	up	sp|Q9SRX4|PME7_ARATH Probable pectinesterase/pectinesterase inhibitor 7 OS=Arabidopsis thaliana GN=PME7 PE=2 SV=1//0
Cla015151	3647.77	1475.84	1.3055	6.8482e-10	3.4076e-08	up	sp|Q9SIC9|PP178_ARATH Pentatricopeptide repeat-containing protein At2g31400, chloroplastic OS=Arabidopsis thaliana GN=At2g31400 PE=2 SV=1//0
Cla015152	673.499	210.931	1.6749	0.0011993	0.012952	up	sp|Q93XK2|STSYN_PEA Stachyose synthase OS=Pisum sativum GN=STS1 PE=1 SV=1//0
Cla015154	1894.12	228.335	3.0523	3.8761e-31	2.3086e-28	up	sp|Q93WV4|WRK71_ARATH Probable WRKY transcription factor 71 OS=Arabidopsis thaliana GN=WRKY71 PE=2 SV=1//8.87795e-42
Cla015155	2228.05	1363.76	0.70819	0.00086027	0.0098492	up	-//-
Cla015160	3550.44	1373.17	1.3705	2.7922e-10	1.4995e-08	up	sp|Q93W77|NIFU1_ARATH NifU-like protein 1, chloroplastic OS=Arabidopsis thaliana GN=NIFU1 PE=1 SV=1//5.22058e-62
Cla015204	1610.37	973.528	0.72609	0.00084133	0.0096753	up	sp|Q9FFZ1|PPH_ARATH Pheophytinase, chloroplastic OS=Arabidopsis thaliana GN=PPH PE=1 SV=1//0
Cla015213	2797.93	1247.38	1.1655	5.2076e-08	1.8926e-06	up	sp|Q9LY66|RK1_ARATH 50S ribosomal protein L1, chloroplastic OS=Arabidopsis thaliana GN=RPL1 PE=1 SV=1//2.35576e-156
Cla015232	4848.26	3131.12	0.63079	0.002182	0.021337	up	sp|E0X9N4|C3H69_ARATH Zinc finger CCCH domain-containing protein 69 OS=Arabidopsis thaliana GN=At3g63550 PE=3 SV=1//2.45425e-138
Cla015233	9054.56	2310.78	1.9703	1.1115e-21	2.9128e-19	up	sp|P82658|TL19_ARATH Thylakoid lumenal 19 kDa protein, chloroplastic OS=Arabidopsis thaliana GN=At3g63540 PE=1 SV=2//1.41965e-99
Cla015235	1156.87	473.194	1.2897	0.00013322	0.0020915	up	sp|Q9SVY1|ZWIP2_ARATH Zinc finger protein WIP2 OS=Arabidopsis thaliana GN=WIP2 PE=1 SV=1//1.14876e-109
Cla015262	72619.1	41785.7	0.79734	5.8497e-05	0.0010301	up	sp|Q9FNA2|PAO1_ARATH Polyamine oxidase 1 OS=Arabidopsis thaliana GN=PAO1 PE=1 SV=1//0
Cla015269	935.378	252.578	1.8888	4.0164e-14	3.7953e-12	up	sp|P82277|RRP2_SPIOL 30S ribosomal protein 2, chloroplastic OS=Spinacia oleracea GN=PSRP2 PE=1 SV=1//6.44486e-88
Cla015271	463.703	245.473	0.91764	0.00053236	0.0066714	up	sp|B8GUD3|CYSG_THISH Siroheme synthase OS=Thioalkalivibrio sulfidiphilus (strain HL-EbGR7) GN=cysG PE=3 SV=1//3.91471e-74
Cla015276	1899.46	1207.28	0.65383	0.0047634	0.038688	up	sp|P46665|HAT14_ARATH Homeobox-leucine zipper protein HAT14 OS=Arabidopsis thaliana GN=HAT14 PE=2 SV=3//5.13643e-72
Cla015277	3553.71	1807.21	0.97556	1.7072e-06	4.6028e-05	up	-//-
Cla015334	448.474	234.996	0.93239	0.00051436	0.0065057	up	-//-
Cla015337	7270.11	4808.13	0.5965	0.0044543	0.036863	up	sp|O04866|ARGD_ALNGL Acetylornithine aminotransferase, mitochondrial OS=Alnus glutinosa GN=AG118 PE=2 SV=1//0
Cla015356	576.175	72.5624	2.9892	2.9907e-24	1.0135e-21	up	-//-
Cla015357	562.89	318.412	0.82196	0.0019332	0.019268	up	sp|Q9LVZ8|LOR12_ARATH Protein LURP-one-related 12 OS=Arabidopsis thaliana GN=At3g15810 PE=2 SV=1//4.74716e-96
Cla015377	8254.26	5481.19	0.59065	0.0051061	0.040731	up	-//-
Cla015384	1105.09	516.162	1.0983	1.4755e-06	4.0505e-05	up	-//-
Cla015400	1492.78	884.559	0.75497	0.0006531	0.0078752	up	sp|Q9M9E2|PPR45_ARATH Pentatricopeptide repeat-containing protein At1g15510, chloroplastic OS=Arabidopsis thaliana GN=PCMP-H73 PE=3 SV=1//1.09935e-52
Cla015401	310.35	90.3201	1.7808	2.1959e-08	8.5634e-07	up	sp|Q0WP36|MOT2_ARATH Molybdate transporter 2 OS=Arabidopsis thaliana GN=MOT2 PE=1 SV=2//8.29342e-176
Cla015413	10178.5	6897.08	0.56147	0.0029813	0.027179	up	sp|Q944I4|GLYK_ARATH D-glycerate 3-kinase, chloroplastic OS=Arabidopsis thaliana GN=GLYK PE=1 SV=2//0
Cla015434	191.739	92.1719	1.0567	0.0018611	0.018711	up	-//-
Cla015452	2957.12	819.605	1.8512	3.4169e-17	5.3727e-15	up	sp|P16180|RR17_ARATH 30S ribosomal protein S17, chloroplastic OS=Arabidopsis thaliana GN=RPS17 PE=1 SV=1//7.01582e-42
Cla015454	3495.69	1895.45	0.88303	2.5423e-05	0.00050575	up	sp|Q6K7S7|CCMH_ORYSJ Cytochrome c-type biogenesis CcmH-like mitochondrial protein OS=Oryza sativa subsp. japonica GN=CCMH PE=2 SV=1//1.2358e-81
Cla015463	2307.11	684.453	1.7531	2.4749e-05	0.00049636	up	sp|Q41951|TIP21_ARATH Aquaporin TIP2-1 OS=Arabidopsis thaliana GN=TIP2-1 PE=1 SV=2//6.45043e-108
Cla015505	384.666	100.569	1.9354	0.0008728	0.0099533	up	sp|P83948|PME3_CITSI Pectinesterase 3 OS=Citrus sinensis PE=1 SV=1//0
Cla015540	11198.8	7079.59	0.66161	0.0019739	0.019608	up	sp|O65351|SBT17_ARATH Subtilisin-like protease SBT1.7 OS=Arabidopsis thaliana GN=SBT1.7 PE=1 SV=1//0
Cla015552	615.423	354.443	0.79602	0.0013981	0.014821	up	-//-
Cla015571	6085.3	3910.23	0.63807	0.0016795	0.017274	up	sp|Q9LNQ4|ALA4_ARATH Probable phospholipid-transporting ATPase 4 OS=Arabidopsis thaliana GN=ALA4 PE=3 SV=2//0
Cla015622	590.965	227.863	1.3749	3.9074e-07	1.1965e-05	up	-//-
Cla015625	297.75	53.5074	2.4763	5.187e-14	4.8318e-12	up	sp|Q9FGK4|B561J_ARATH Cytochrome b561 and DOMON domain-containing protein At5g47530 OS=Arabidopsis thaliana GN=At5g47530 PE=2 SV=1//8.58185e-138
Cla015638	105.053	13.4524	2.9652	1.9687e-06	5.2574e-05	up	sp|Q9SGP2|HSL1_ARATH Receptor-like protein kinase HSL1 OS=Arabidopsis thaliana GN=HSL1 PE=2 SV=1//0
Cla015652	143554	12959	3.4696	4.7219e-06	0.00011587	up	-//-
Cla015680	31324	790.205	5.3089	1.183e-38	1.2238e-35	up	sp|P27518|CB21_GOSHI Chlorophyll a-b binding protein 151, chloroplastic OS=Gossypium hirsutum GN=CAB-151 PE=2 SV=2//2.18224e-178
Cla015689	245.917	57.2652	2.1024	4.8538e-09	2.1013e-07	up	-//-
Cla015710	10263.4	5158.35	0.99253	1.6741e-06	4.5199e-05	up	sp|P52417|GLGS2_VICFA Glucose-1-phosphate adenylyltransferase small subunit 2, chloroplastic OS=Vicia faba GN=AGPP PE=2 SV=1//0
Cla015725	3721.26	1619.75	1.2	1.2884e-08	5.2431e-07	up	sp|Q9FEA2|SYEM_ARATH Glutamate--tRNA ligase, chloroplastic/mitochondrial OS=Arabidopsis thaliana GN=OVA3 PE=2 SV=1//0
Cla015760	13.5171	0.303521	5.4768	0.0060116	0.046441	up	-//-
Cla015762	57.1394	17.5318	1.7045	0.0065236	0.04935	up	-//-
Cla015785	6197.18	2647.49	1.227	1.8739e-09	8.7486e-08	up	sp|O22265|SR43C_ARATH Signal recognition particle 43 kDa protein, chloroplastic OS=Arabidopsis thaliana GN=CAO PE=1 SV=2//3.71872e-128
Cla015797	6457.77	2001.73	1.6898	8.7063e-16	1.104e-13	up	sp|Q39108|GGR_ARATH Heterodimeric geranylgeranyl pyrophosphate synthase small subunit, chloroplastic OS=Arabidopsis thaliana GN=GGR PE=1 SV=2//5.26329e-137
Cla015804	4017.64	2627.71	0.61254	0.0034137	0.030101	up	sp|P42844|ZIM17_YEAST Mitochondrial protein import protein ZIM17 OS=Saccharomyces cerevisiae (strain ATCC 204508 / S288c) GN=ZIM17 PE=1 SV=2//1.78638e-08
Cla015826	1369.14	497.983	1.4591	5.0706e-10	2.582e-08	up	sp|Q9SZN7|HIP26_ARATH Heavy metal-associated isoprenylated plant protein 26 OS=Arabidopsis thaliana GN=HIPP26 PE=1 SV=1//3.19877e-88
Cla015860	17.0374	0	Inf	0.00034497	0.0046696	up	sp|Q9FK62|SAU24_ARATH Auxin-responsive protein SAUR24 OS=Arabidopsis thaliana GN=SAUR24 PE=2 SV=1//6.31526e-34
Cla015894	236.861	107.013	1.1463	0.00036597	0.00489	up	sp|Q0IGM7|BBX20_ARATH B-box zinc finger protein 20 OS=Arabidopsis thaliana GN=BBX20 PE=1 SV=1//4.06414e-60
Cla015897	16546.9	3460.18	2.2576	2.8268e-10	1.5139e-08	up	-//-
Cla015919	906.23	140.773	2.6865	8.2284e-07	2.3544e-05	up	sp|Q58FS3|RAD_ANTMA Transcription factor RADIALIS OS=Antirrhinum majus GN=RAD PE=1 SV=1//3.4223e-33
Cla015926	2261.35	1222.21	0.88769	0.00017605	0.0026679	up	-//-
Cla015927	5064.47	3051.13	0.73107	0.003341	0.029633	up	sp|Q8RX01|Y3567_ARATH BTB/POZ domain-containing protein At3g05675 OS=Arabidopsis thaliana GN=At3g05675 PE=2 SV=1//5.94409e-15
Cla015934	1607.87	1084.19	0.56853	0.0060134	0.046441	up	sp|Q8VY05|SWI3D_ARATH SWI/SNF complex subunit SWI3D OS=Arabidopsis thaliana GN=SWI3D PE=1 SV=3//6.4064e-112
Cla015936	538.574	30.409	4.1466	0.00065622	0.0078984	up	sp|P17772|OSS2_PEA Organ-specific protein S2 OS=Pisum sativum PE=2 SV=1//1.0582e-13
Cla015937	31189.2	3494.64	3.1578	0.0011925	0.012907	up	sp|P17772|OSS2_PEA Organ-specific protein S2 OS=Pisum sativum PE=2 SV=1//9.61258e-08
Cla015941	107.664	23.8593	2.1739	0.00010724	0.0017305	up	sp|Q9XIH7|PLT1_ARATH Putative polyol transporter 1 OS=Arabidopsis thaliana GN=PLT1 PE=3 SV=1//0
Cla015947	1754.88	932.253	0.91258	0.0042598	0.035689	up	sp|Q8VZ80|PLT5_ARATH Polyol transporter 5 OS=Arabidopsis thaliana GN=PLT5 PE=1 SV=2//0
Cla015950	27.4505	2.71505	3.3378	0.0015694	0.016347	up	sp|Q8VZ80|PLT5_ARATH Polyol transporter 5 OS=Arabidopsis thaliana GN=PLT5 PE=1 SV=2//0
Cla015963	64497.3	23174.9	1.4767	3.8479e-12	2.8011e-10	up	sp|Q94B35|ISPH_ARATH 4-hydroxy-3-methylbut-2-enyl diphosphate reductase, chloroplastic OS=Arabidopsis thaliana GN=ISPH PE=2 SV=1//0
Cla015965	540.979	298.979	0.85553	0.0011753	0.012756	up	sp|Q8SKU2|TIC62_PEA Protein TIC 62, chloroplastic OS=Pisum sativum GN=TIC62 PE=1 SV=2//1.16847e-146
Cla015978	1184.79	425.104	1.4787	3.9576e-05	0.00074012	up	-//-
Cla015988	1066.5	539.171	0.98407	2.2918e-05	0.0004639	up	-//-
Cla015991	1068.2	591.722	0.85219	0.00018524	0.0027751	up	sp|Q9LTH4|PCLL_ARATH Transcription factor BOA OS=Arabidopsis thaliana GN=BOA PE=2 SV=1//1.6856e-11
Cla016012	334.3	93.6358	1.836	6.7197e-09	2.8404e-07	up	sp|O65862|CAMT1_POPTR Caffeoyl-CoA O-methyltransferase 1 OS=Populus trichocarpa GN=CCOAOMT1 PE=2 SV=1//8.09907e-172
Cla016053	6904.28	2628.58	1.3932	0.00018109	0.0027219	up	sp|Q9MB73|LGT_CITUN Limonoid UDP-glucosyltransferase OS=Citrus unshiu PE=2 SV=1//0
Cla016057	14.1665	0	Inf	0.0013628	0.014511	up	-//-
Cla016058	3600.83	1307.58	1.4614	0.0037744	0.032609	up	sp|Q9MB73|LGT_CITUN Limonoid UDP-glucosyltransferase OS=Citrus unshiu PE=2 SV=1//0
Cla016089	11583.2	6077.79	0.93041	5.1339e-06	0.00012473	up	sp|Q9XJ35|CLPR1_ARATH ATP-dependent Clp protease proteolytic subunit-related protein 1, chloroplastic OS=Arabidopsis thaliana GN=CLPR1 PE=1 SV=1//2.17182e-179
Cla016115	6038.48	3978.72	0.60188	0.00469	0.038298	up	sp|Q94AR8|LEUC_ARATH 3-isopropylmalate dehydratase large subunit OS=Arabidopsis thaliana GN=IIL1 PE=1 SV=1//0
Cla016118	169.751	73.0066	1.2173	0.00097486	0.010924	up	-//-
Cla016159	1225.74	713.623	0.78041	0.00056826	0.0070246	up	sp|Q40546|KPYG_TOBAC Pyruvate kinase isozyme G, chloroplastic OS=Nicotiana tabacum PE=2 SV=1//1.83258e-177
Cla016160	1014.44	510.321	0.9912	2.1367e-05	0.00043653	up	sp|P55964|KPYG_RICCO Pyruvate kinase isozyme G, chloroplastic (Fragment) OS=Ricinus communis PE=2 SV=1//2.12252e-116
Cla016167	2696.34	1435.42	0.90953	1.7231e-05	0.00036027	up	sp|Q9LQK7|AB7I_ARATH Protein ABCI7, chloroplastic OS=Arabidopsis thaliana GN=ABCI7 PE=1 SV=1//0
Cla016176	1862.85	560.98	1.7315	2.8991e-14	2.8491e-12	up	sp|P0A3C8|FER1_NOSSO Ferredoxin-1 OS=Nostoc sp. (strain ATCC 29151 / PCC 7119) GN=petF PE=1 SV=2//1.17691e-07
Cla016189	213.737	48.8543	2.1293	0.004091	0.034622	up	-//-
Cla016190	992.743	148.481	2.7411	2.8884e-11	1.8373e-09	up	sp|Q940I0|AHL13_ARATH AT-hook motif nuclear-localized protein 13 OS=Arabidopsis thaliana GN=AHL13 PE=1 SV=1//9.33196e-50
Cla016244	1444	959.063	0.59037	0.0050828	0.040594	up	sp|Q39639|PLSB_CUCSA Glycerol-3-phosphate acyltransferase, chloroplastic OS=Cucumis sativus PE=2 SV=1//0
Cla016252	571.953	69.2751	3.0455	8.4591e-25	3.137e-22	up	sp|Q9C6T2|PPR68_ARATH Pentatricopeptide repeat-containing protein At1g31920 OS=Arabidopsis thaliana GN=PCMP-H11 PE=2 SV=1//0
Cla016270	1228.45	703.643	0.80393	0.00033456	0.0045444	up	sp|P43935|Y077_HAEIN Uncharacterized protein HI_0077 OS=Haemophilus influenzae (strain ATCC 51907 / DSM 11121 / KW20 / Rd) GN=HI_0077 PE=4 SV=1//2.13925e-35
Cla016287	31181.5	12954.5	1.2672	6.432e-11	3.8309e-09	up	sp|Q04644|ACCO1_CUCME 1-aminocyclopropane-1-carboxylate oxidase 1 OS=Cucumis melo GN=ACO1 PE=2 SV=1//0
Cla016347	1110.55	511.87	1.1174	2.1058e-06	5.5856e-05	up	sp|P51412|RK21_ARATH 50S ribosomal protein L21, chloroplastic OS=Arabidopsis thaliana GN=RPL21 PE=2 SV=1//8.88833e-51
Cla016358	15465.7	6696.29	1.2076	1.3444e-09	6.3981e-08	up	sp|P14614|GLUB4_ORYSJ Glutelin type-B 4 OS=Oryza sativa subsp. japonica GN=GLUB4 PE=1 SV=1//3.04878e-32
Cla016383	32.1922	1.62235	4.3106	7.2306e-05	0.001238	up	sp|Q9MAP5|SBT33_ARATH Subtilisin-like protease SBT3.3 OS=Arabidopsis thaliana GN=SBT3.3 PE=2 SV=1//7.30624e-07
Cla016385	6978.75	1247.82	2.4836	3.6292e-19	7.3538e-17	up	sp|Q5VRY0|RH39_ORYSJ DEAD-box ATP-dependent RNA helicase 39 OS=Oryza sativa subsp. japonica GN=Os01g0184500 PE=2 SV=1//0
Cla016391	67.0234	19.5447	1.7779	0.0013202	0.014141	up	-//-
Cla016423	4334.92	1744.34	1.3133	8.3055e-06	0.00019048	up	-//-
Cla016434	1745.97	725.178	1.2676	3.577e-09	1.6046e-07	up	sp|F4KEW8|NET4A_ARATH Protein NETWORKED 4A OS=Arabidopsis thaliana GN=NET4A PE=2 SV=1//3.88713e-20
Cla016453	6094.5	1779.27	1.7762	4.969e-17	7.6302e-15	up	sp|Q93ZC5|AOC4_ARATH Allene oxide cyclase 4, chloroplastic OS=Arabidopsis thaliana GN=AOC4 PE=2 SV=1//3.37813e-73
Cla016471	130.12	58.7878	1.1463	0.0042021	0.035348	up	sp|O67409|TRPB2_AQUAE Tryptophan synthase beta chain 2 OS=Aquifex aeolicus (strain VF5) GN=trpB2 PE=3 SV=1//0
Cla016506	14714.7	8861.46	0.73165	0.0023298	0.022392	up	sp|Q69F95|C85A_PHAVU Cytochrome P450 85A OS=Phaseolus vulgaris GN=BA13 PE=3 SV=2//0
Cla016534	836.07	475.038	0.81558	0.00086492	0.0098838	up	-//-
Cla016538	3163.58	1547.76	1.0314	0.0055023	0.043259	up	sp|P42738|CM1_ARATH Chorismate mutase 1, chloroplastic OS=Arabidopsis thaliana GN=CM1 PE=1 SV=3//1.55942e-124
Cla016543	495.429	272.571	0.86205	0.0013459	0.014353	up	-//-
Cla016557	214.962	92.0815	1.2231	0.00046331	0.0059674	up	sp|C0LGK4|Y2165_ARATH Probable LRR receptor-like serine/threonine-protein kinase At2g16250 OS=Arabidopsis thaliana GN=At2g16250 PE=2 SV=1//0
Cla016558	307736	141517	1.1207	1.2654e-08	5.1709e-07	up	sp|Q03250|RBG7_ARATH Glycine-rich RNA-binding protein 7 OS=Arabidopsis thaliana GN=RBG7 PE=1 SV=1//4.74568e-43
Cla016572	3745.5	2470.51	0.60035	0.0023138	0.022314	up	sp|Q84V03|FB348_ARATH F-box protein At2g16365 OS=Arabidopsis thaliana GN=At2g16365 PE=2 SV=2//1.26938e-13
Cla016580	18882.3	12652.8	0.57758	0.0040407	0.034277	up	sp|F4IHJ0|SFH8_ARATH Phosphatidylinositol/phosphatidylcholine transfer protein SFH8 OS=Arabidopsis thaliana GN=SFH8 PE=2 SV=1//0
Cla016600	928.511	556.252	0.73918	0.0019246	0.019193	up	sp|Q8W4G3|MATE4_ARATH MATE efflux family protein 4, chloroplastic OS=Arabidopsis thaliana GN=DTX46 PE=2 SV=1//2.45479e-178
Cla016608	1155.48	637.294	0.85846	0.00010969	0.0017672	up	sp|Q93YQ7|GUN24_ARATH Endoglucanase 24 OS=Arabidopsis thaliana GN=At4g39010 PE=2 SV=1//0
Cla016609	401.023	141.579	1.5021	0.0010826	0.011861	up	sp|Q944G9|ALFC2_ARATH Probable fructose-bisphosphate aldolase 2, chloroplastic OS=Arabidopsis thaliana GN=FBA2 PE=1 SV=2//0
Cla016612	7354.03	4161.48	0.82144	0.0001274	0.0020113	up	sp|Q43075|SPE1_PEA Arginine decarboxylase OS=Pisum sativum PE=2 SV=1//0
Cla016615	179.318	57.1215	1.6504	9.9131e-06	0.00022155	up	sp|O65693|RBFA_ARATH Probable ribosome-binding factor A, chloroplastic OS=Arabidopsis thaliana GN=At4g34730 PE=2 SV=2//1.80574e-87
Cla016621	13.9206	0	Inf	0.0015535	0.016198	up	sp|Q9FK62|SAU24_ARATH Auxin-responsive protein SAUR24 OS=Arabidopsis thaliana GN=SAUR24 PE=2 SV=1//5.2556e-37
Cla016626	70.1878	8.67049	3.017	0.0041051	0.034715	up	sp|Q9FK62|SAU24_ARATH Auxin-responsive protein SAUR24 OS=Arabidopsis thaliana GN=SAUR24 PE=2 SV=1//1.74301e-29
Cla016645	1233.9	798.103	0.62859	0.0047622	0.038688	up	sp|Q8VYL1|KAD5_ARATH Adenylate kinase 5, chloroplastic OS=Arabidopsis thaliana GN=At5g35170 PE=1 SV=1//0
Cla016662	2327.52	592.976	1.9727	1.0688e-08	4.4321e-07	up	sp|Q46036|BLC_CITFR Outer membrane lipoprotein Blc OS=Citrobacter freundii PE=3 SV=1//1.66399e-25
Cla016682	111.749	19.8873	2.4903	4.6954e-07	1.4068e-05	up	sp|Q15B89|S35D2_PIG UDP-N-acetylglucosamine/UDP-glucose/GDP-mannose transporter (Fragment) OS=Sus scrofa GN=SLC35D2 PE=2 SV=1//3.75517e-33
Cla016683	1876.34	900.535	1.0591	1.1434e-05	0.00025165	up	sp|Q9SRR7|CML3_ARATH Calmodulin-like protein 3 OS=Arabidopsis thaliana GN=CML3 PE=2 SV=1//2.50588e-29
Cla016687	774.285	444.674	0.80012	0.0010299	0.011405	up	-//-
Cla016705	4136.2	1683.42	1.2969	1.6405e-05	0.00034634	up	sp|Q8LBH4|SPX1_ARATH SPX domain-containing protein 1 OS=Arabidopsis thaliana GN=SPX1 PE=2 SV=2//1.65125e-125
Cla016707	546.744	142.717	1.9377	2.0102e-12	1.5255e-10	up	-//-
Cla016727	11236.8	3028.48	1.8916	0.00023321	0.0033729	up	sp|Q02921|NO93_SOYBN Early nodulin-93 OS=Glycine max PE=2 SV=1//1.79776e-34
Cla016738	321.031	136.624	1.2325	0.0032309	0.028918	up	-//-
Cla016739	590.761	286.757	1.0427	7.2047e-05	0.0012346	up	sp|Q84L08|GONS4_ARATH GDP-mannose transporter GONST4 OS=Arabidopsis thaliana GN=GONST4 PE=2 SV=1//1.48462e-174
Cla016740	160.12	31.5063	2.3454	4.2524e-08	1.58e-06	up	sp|Q683I9|PP295_ARATH Pentatricopeptide repeat-containing protein At3g62890 OS=Arabidopsis thaliana GN=PCMP-H82 PE=2 SV=1//5.24873e-25
Cla016750	26890.5	11644.8	1.2074	0.00052929	0.0066559	up	-//-
Cla016752	490.878	287.835	0.77012	0.0027988	0.025899	up	sp|Q9LHF5|VIL1_ARATH VIN3-like protein 1 OS=Arabidopsis thaliana GN=VIL1 PE=1 SV=1//2.98908e-171
Cla016774	830.05	449.588	0.8846	0.0001988	0.0029535	up	sp|Q9SZD1|TCX5_ARATH Protein tesmin/TSO1-like CXC 5 OS=Arabidopsis thaliana GN=TCX5 PE=1 SV=1//0
Cla016781	6367.3	2128.3	1.581	3.7334e-14	3.5626e-12	up	sp|Q8W593|LGUC_ARATH Probable lactoylglutathione lyase, chloroplast OS=Arabidopsis thaliana GN=At1g67280 PE=1 SV=1//0
Cla016784	3240.09	1985.05	0.70686	0.00038254	0.0050905	up	-//-
Cla016807	742.976	142.348	2.3839	0.0034945	0.030676	up	sp|P27061|PPA1_SOLLC Acid phosphatase 1 OS=Solanum lycopersicum GN=APS1 PE=2 SV=1//3.68393e-77
Cla016808	71.6609	24.3994	1.5543	0.0036434	0.031701	up	sp|Q9LHF1|LRX4_ARATH Leucine-rich repeat extensin-like protein 4 OS=Arabidopsis thaliana GN=LRX4 PE=2 SV=1//1.90442e-93
Cla016825	138.417	3.90342	5.1481	0.00010114	0.001647	up	sp|Q9ZUN4|ACCO1_ARATH 1-aminocyclopropane-1-carboxylate oxidase 1 OS=Arabidopsis thaliana GN=ACO1 PE=2 SV=1//2.59666e-145
Cla016830	723.927	374.014	0.95275	0.00046484	0.0059833	up	-//-
Cla016832	50.258	10.3702	2.2769	0.00067437	0.0080429	up	-//-
Cla016833	22.3567	0.648025	5.1085	0.00035237	0.0047539	up	sp|Q9LTS3|CKX3_ARATH Cytokinin dehydrogenase 3 OS=Arabidopsis thaliana GN=CKX3 PE=1 SV=1//0
Cla016840	21.4438	1.80906	3.5673	0.0031835	0.028546	up	sp|Q38932|LCYE_ARATH Lycopene epsilon cyclase, chloroplastic OS=Arabidopsis thaliana GN=LUT2 PE=1 SV=2//0
Cla016845	2306.84	1415.53	0.70457	0.00085737	0.009826	up	-//-
Cla016851	1775.27	683.022	1.378	0.00045173	0.005849	up	-//-
Cla016873	3133.54	1616.78	0.95467	4.8395e-06	0.00011846	up	sp|Q0DLB9|RH17_ORYSJ DEAD-box ATP-dependent RNA helicase 17 OS=Oryza sativa subsp. japonica GN=Os05g0110500 PE=2 SV=2//4.05519e-65
Cla016885	1331.19	689.442	0.94922	2.9038e-05	0.00056741	up	-//-
Cla016889	5090.76	2065.68	1.3013	0.0018892	0.018906	up	-//-
Cla016899	2551.57	1016.5	1.3278	2.6992e-07	8.5846e-06	up	sp|Q9C5U0|AHK4_ARATH Histidine kinase 4 OS=Arabidopsis thaliana GN=AHK4 PE=1 SV=1//0
Cla016903	277.386	106.606	1.3796	0.00053178	0.0066714	up	sp|Q9FRH3|CAP13_ARATH Putative clathrin assembly protein At1g25240 OS=Arabidopsis thaliana GN=At1g25240 PE=3 SV=1//9.99898e-116
Cla016948	2215.64	987.159	1.1664	1.4765e-07	4.9947e-06	up	sp|O80840|PMM_ARATH Phosphomannomutase OS=Arabidopsis thaliana GN=PMM PE=1 SV=1//7.19961e-155
Cla016949	38830.5	19831.8	0.96937	1.4402e-06	3.9589e-05	up	sp|Q69ZF3|GBA2_MOUSE Non-lysosomal glucosylceramidase OS=Mus musculus GN=Gba2 PE=1 SV=2//1.0806e-157
Cla016954	2066.48	801.409	1.3666	5.0618e-06	0.00012328	up	sp|Q9SS31|CML36_ARATH Probable calcium-binding protein CML36 OS=Arabidopsis thaliana GN=CML36 PE=2 SV=1//2.6954e-29
Cla016961	183.755	65.8663	1.4802	0.0033196	0.02947	up	sp|Q93Y09|SCP45_ARATH Serine carboxypeptidase-like 45 OS=Arabidopsis thaliana GN=SCPL45 PE=2 SV=1//2.11482e-55
Cla017008	177.399	29.9039	2.5686	0.00066697	0.0079806	up	sp|Q19KC1|NIP21_MAIZE Aquaporin NIP2-1 OS=Zea mays GN=NIP2-1 PE=2 SV=2//7.96374e-108
Cla017037	599.583	276.231	1.1181	3.1607e-05	0.00060845	up	sp|Q54DY9|BCS1B_DICDI Probable mitochondrial chaperone BCS1-B OS=Dictyostelium discoideum GN=bcsl1b PE=3 SV=1//2.09875e-33
Cla017061	2005.59	698.634	1.5214	6.6693e-12	4.6984e-10	up	-//-
Cla017074	5878.41	3311.24	0.82805	3.1548e-05	0.00060845	up	sp|Q9M7J9|POT8_ARATH Potassium transporter 8 OS=Arabidopsis thaliana GN=POT8 PE=2 SV=2//0
Cla017086	968.2	310.753	1.6395	1.8603e-11	1.2188e-09	up	sp|Q9SSA5|CYP38_ARATH Peptidyl-prolyl cis-trans isomerase CYP38, chloroplastic OS=Arabidopsis thaliana GN=CYP38 PE=1 SV=1//7.90279e-179
Cla017099	1802.61	527.572	1.7726	5.7207e-15	6.4251e-13	up	sp|P02398|RK12_SPIOL 50S ribosomal protein L12, chloroplastic OS=Spinacia oleracea GN=RPL12 PE=1 SV=2//5.11849e-53
Cla017136	961.111	542.086	0.82618	0.00019162	0.0028641	up	-//-
Cla017153	26628.3	12446.1	1.0973	2.18e-08	8.5183e-07	up	-//-
Cla017158	37.6763	6.48345	2.5388	0.0015743	0.01638	up	sp|Q9C992|KCS7_ARATH 3-ketoacyl-CoA synthase 7 OS=Arabidopsis thaliana GN=KCS7 PE=2 SV=1//0
Cla017181	59425.4	37549.1	0.6623	0.00064538	0.0077869	up	sp|Q5R6D1|CATB_PONAB Cathepsin B OS=Pongo abelii GN=CTSB PE=2 SV=1//1.2986e-81
Cla017190	1965.3	1090.07	0.85033	9.6107e-05	0.0015755	up	-//-
Cla017227	6295.27	3068.52	1.0367	2.1175e-07	6.8679e-06	up	sp|Q9FZ47|ACR11_ARATH ACT domain-containing protein ACR11 OS=Arabidopsis thaliana GN=ACR11 PE=1 SV=1//1.64593e-119
Cla017284	8604.93	2660.74	1.6933	1.2342e-14	1.2972e-12	up	-//-
Cla017286	692.648	212.397	1.7054	3.1832e-11	2.0118e-09	up	sp|Q9LY66|RK1_ARATH 50S ribosomal protein L1, chloroplastic OS=Arabidopsis thaliana GN=RPL1 PE=1 SV=1//5.46377e-146
Cla017299	1460.86	495.905	1.5587	1.6002e-11	1.059e-09	up	sp|Q43082|HEM3_PEA Porphobilinogen deaminase, chloroplastic OS=Pisum sativum GN=HEMC PE=1 SV=1//0
Cla017319	217.493	42.2397	2.3643	1.6469e-07	5.4958e-06	up	-//-
Cla017325	4221.49	93.3084	5.4996	1.5161e-48	2.98e-45	up	sp|P07369|CB2G_SOLLC Chlorophyll a-b binding protein 3C, chloroplastic OS=Solanum lycopersicum GN=CAB3C PE=3 SV=1//4.54547e-169
Cla017364	62762.8	30918.4	1.0214	5.5027e-05	0.00097701	up	sp|Q8LGG8|USPAL_ARATH Universal stress protein A-like protein OS=Arabidopsis thaliana GN=At3g01520 PE=1 SV=2//5.33491e-14
Cla017383	373.981	105.161	1.8304	3.6389e-07	1.1246e-05	up	sp|Q9SRW9|CSLD5_ARATH Cellulose synthase-like protein D5 OS=Arabidopsis thaliana GN=CSLD5 PE=2 SV=1//0
Cla017384	244.841	97.5847	1.3271	0.00049628	0.0063217	up	sp|Q9SRW9|CSLD5_ARATH Cellulose synthase-like protein D5 OS=Arabidopsis thaliana GN=CSLD5 PE=2 SV=1//0
Cla017390	4583.76	2810.01	0.70595	0.00060316	0.0073634	up	sp|P0DKG8|RSH1L_ARATH Putative GTP diphosphokinase RSH1, chloroplastic OS=Arabidopsis thaliana GN=RSH1 PE=1 SV=1//0
Cla017397	2174.71	1253.72	0.7946	0.00016709	0.0025538	up	sp|P80299|HYES_RAT Bifunctional epoxide hydrolase 2 OS=Rattus norvegicus GN=Ephx2 PE=1 SV=1//2.37296e-47
Cla017416	115.167	35.0654	1.7156	0.00033333	0.0045371	up	sp|Q9SEA0|CCS_CITSI Capsanthin/capsorubin synthase, chromoplast OS=Citrus sinensis GN=CCS PE=3 SV=1//0
Cla017419	995.798	407.043	1.2907	1.0462e-07	3.6203e-06	up	sp|Q9LZJ5|AB14C_ARATH ABC transporter C family member 14 OS=Arabidopsis thaliana GN=ABCC14 PE=1 SV=1//0
Cla017446	2046.17	1220	0.74605	0.0029304	0.026852	up	sp|O80683|CAB25_ARATH Calmodulin-binding protein 25 OS=Arabidopsis thaliana GN=CAMBP25 PE=1 SV=1//1.28994e-25
Cla017479	340.627	194.626	0.80749	0.0033589	0.029758	up	sp|Q9FYE2|PKS4_ARATH Protein PHYTOCHROME KINASE SUBSTRATE 4 OS=Arabidopsis thaliana GN=PKS4 PE=1 SV=1//2.586e-07
Cla017483	130.718	55.5492	1.2346	0.0019116	0.019101	up	sp|Q5W274|PDR3_TOBAC Pleiotropic drug resistance protein 3 OS=Nicotiana tabacum GN=PDR3 PE=2 SV=1//1.69865e-23
Cla017496	2043.2	1070.01	0.93321	0.0065269	0.04935	up	sp|Q9FDW1|MYB44_ARATH Transcription factor MYB44 OS=Arabidopsis thaliana GN=MYB44 PE=2 SV=1//6.66454e-36
Cla017504	33.4812	2.22939	3.9086	0.0045244	0.037349	up	sp|Q9SVX5|DRE2F_ARATH Dehydration-responsive element-binding protein 2F OS=Arabidopsis thaliana GN=DREB2F PE=2 SV=1//1.61023e-41
Cla017510	8320.89	5549.65	0.58434	0.0048517	0.039162	up	sp|Q54D08|LST8_DICDI Protein LST8 homolog OS=Dictyostelium discoideum GN=lst8 PE=1 SV=1//2.49675e-133
Cla017521	774.368	480.61	0.68815	0.0037306	0.032316	up	sp|Q8C1A9|CD029_MOUSE Uncharacterized protein C4orf29 homolog OS=Mus musculus PE=2 SV=1//4.24964e-14
Cla017529	395.602	163.168	1.2777	0.0031391	0.028238	up	sp|A3C057|SPL17_ORYSJ Squamosa promoter-binding-like protein 17 OS=Oryza sativa subsp. japonica GN=SPL17 PE=2 SV=2//1.69673e-29
Cla017530	167.228	60.4899	1.467	0.0038556	0.033063	up	sp|Q9M2Q6|SPL15_ARATH Squamosa promoter-binding-like protein 15 OS=Arabidopsis thaliana GN=SPL15 PE=2 SV=1//7.36742e-26
Cla017541	1213.72	245.413	2.3062	8.6917e-21	2.1902e-18	up	sp|Q8S9M1|PAP13_ARATH Probable plastid-lipid-associated protein 13, chloroplastic OS=Arabidopsis thaliana GN=PAP13 PE=2 SV=2//9.4518e-124
Cla017585	9434.85	3308.08	1.512	5.2437e-14	4.8616e-12	up	sp|Q94AX4|DLD_ARATH D-lactate dehydrogenase [cytochrome], mitochondrial OS=Arabidopsis thaliana GN=DLD PE=1 SV=1//0
Cla017593	2515.88	1433.92	0.8111	0.00013473	0.0021117	up	sp|Q2VEX9|CRTSO_DAUCA Prolycopene isomerase, chloroplastic OS=Daucus carota GN=CRTISO PE=2 SV=1//0
Cla017613	2214.13	873.385	1.3421	0.00010158	0.0016515	up	sp|P19684|ROC5_NICSY 33 kDa ribonucleoprotein, chloroplastic OS=Nicotiana sylvestris PE=1 SV=1//1.44648e-99
Cla017646	7241.7	3825.14	0.92082	6.7704e-06	0.00015861	up	sp|Q9C5R8|BAS1B_ARATH 2-Cys peroxiredoxin BAS1-like, chloroplastic OS=Arabidopsis thaliana GN=At5g06290 PE=2 SV=3//1.51409e-127
Cla017660	84542.4	10384.1	3.0253	1.6807e-16	2.3766e-14	up	sp|Q94KL7|SILD_FORIN Secoisolariciresinol dehydrogenase (Fragment) OS=Forsythia intermedia PE=1 SV=1//8.90749e-111
Cla017688	2090.5	1146.3	0.86687	7.0455e-05	0.0012126	up	-//-
Cla017690	2579.73	1744.16	0.56468	0.0064711	0.04907	up	sp|Q8GW20|Y5390_ARATH Uncharacterized protein At5g03900, chloroplastic OS=Arabidopsis thaliana GN=At5g03900 PE=2 SV=2//0
Cla017712	252.925	122.91	1.0411	0.0050642	0.040525	up	sp|Q7PC87|AB34G_ARATH ABC transporter G family member 34 OS=Arabidopsis thaliana GN=ABCG34 PE=2 SV=1//0
Cla017715	5151.82	2433.54	1.082	9.2068e-07	2.6037e-05	up	sp|Q41058|GLGB1_PEA 1,4-alpha-glucan-branching enzyme 1, chloroplastic/amyloplastic OS=Pisum sativum GN=SBEI PE=1 SV=1//0
Cla017718	50.8899	6.87351	2.8883	6.311e-05	0.0011035	up	-//-
Cla017735	1923.32	1140.07	0.75447	0.00086039	0.0098492	up	sp|Q69TY4|PR2E1_ORYSJ Peroxiredoxin-2E-1, chloroplastic OS=Oryza sativa subsp. japonica GN=PRXIIE-1 PE=2 SV=1//6.88007e-87
Cla017740	300.256	89.2667	1.75	5.233e-08	1.8977e-06	up	sp|Q9SJQ1|PXC1_ARATH Leucine-rich repeat receptor-like protein kinase PXC1 OS=Arabidopsis thaliana GN=PXC1 PE=2 SV=1//0
Cla017747	925.559	376.997	1.2958	6.6784e-08	2.3737e-06	up	sp|Q9LZM4|WAKLQ_ARATH Wall-associated receptor kinase-like 20 OS=Arabidopsis thaliana GN=WAKL20 PE=2 SV=1//6.91333e-177
Cla017769	846.92	242.147	1.8063	4.4471e-10	2.2942e-08	up	sp|Q9ZQ96|U73C3_ARATH UDP-glycosyltransferase 73C3 OS=Arabidopsis thaliana GN=UGT73C3 PE=2 SV=1//9.7088e-163
Cla017783	35723.8	19757.8	0.85446	0.00089677	0.010194	up	sp|P25818|TIP11_ARATH Aquaporin TIP1-1 OS=Arabidopsis thaliana GN=TIP1-1 PE=1 SV=1//1.60107e-110
Cla017789	68.6997	10.4083	2.7226	5.8402e-06	0.00013931	up	sp|F4I9E1|NFD4_ARATH Protein NUCLEAR FUSION DEFECTIVE 4 OS=Arabidopsis thaliana GN=NFD4 PE=3 SV=1//4.48651e-08
Cla017806	281.087	107.303	1.3893	1.0759e-05	0.00023868	up	sp|Q9SBN4|PGKH_VOLCA Phosphoglycerate kinase, chloroplastic OS=Volvox carteri GN=PGK PE=2 SV=1//5.12583e-50
Cla017815	10063.6	1806.02	2.4783	4.8226e-31	2.7879e-28	up	sp|Q9ZUU4|CP29B_ARATH RNA-binding protein CP29B, chloroplastic OS=Arabidopsis thaliana GN=CP29B PE=1 SV=1//2.41173e-99
Cla017828	1780.31	925.659	0.94358	1.6935e-05	0.00035524	up	-//-
Cla017829	24834.4	10058.6	1.3039	2.7537e-11	1.7573e-09	up	sp|Q42580|PER21_ARATH Peroxidase 21 OS=Arabidopsis thaliana GN=PER21 PE=1 SV=1//3.82575e-91
Cla017850	158.355	62.4289	1.3429	0.00031498	0.0043294	up	sp|Q8RWU3|RVE8_ARATH Protein REVEILLE 8 OS=Arabidopsis thaliana GN=RVE8 PE=2 SV=1//2.66839e-119
Cla017883	2607.38	1382.09	0.91575	0.00029234	0.0040608	up	sp|Q94AA1|UN933_ARATH UNC93-like protein 3 OS=Arabidopsis thaliana GN=At3g09470 PE=2 SV=1//1.57475e-178
Cla017906	192.938	93.6834	1.0423	0.0021521	0.021108	up	-//-
Cla017910	3488.27	658.629	2.405	4.8696e-06	0.00011905	up	-//-
Cla017928	1389.32	460.122	1.5943	0.0066097	0.049831	up	sp|Q96480|P5CS_SOLLC Delta-1-pyrroline-5-carboxylate synthase OS=Solanum lycopersicum GN=PRO2 PE=2 SV=1//0
Cla017938	2763.37	895.921	1.625	3.9749e-12	2.8829e-10	up	sp|P0CI03|PTR28_ARATH Protein NRT1/ PTR FAMILY 5.6 OS=Arabidopsis thaliana GN=NPF5.6 PE=2 SV=1//0
Cla017947	466.437	257.217	0.8587	0.0014011	0.014845	up	sp|Q93YV9|SKIP8_ARATH F-box protein SKIP8 OS=Arabidopsis thaliana GN=SKIP8 PE=1 SV=1//1.74209e-12
Cla017953	607.215	292.422	1.0542	7.2545e-05	0.001241	up	sp|Q9M394|SCKL1_ARATH Fructokinase-like 1, chloroplastic OS=Arabidopsis thaliana GN=FLN1 PE=1 SV=1//1.18408e-151
Cla017983	1586.22	717.296	1.145	0.0019134	0.019109	up	sp|Q07473|CB4A_ARATH Chlorophyll a-b binding protein CP29.1, chloroplastic OS=Arabidopsis thaliana GN=LHCB4.1 PE=1 SV=1//7.4766e-166
Cla017985	1689.1	986.9	0.77528	0.0025098	0.023751	up	sp|O65023|EAAC_ARATH Probable envelope ADP,ATP carrier protein, chloroplastic OS=Arabidopsis thaliana GN=EAAC PE=2 SV=2//2.68883e-151
Cla017999	279.017	59.2515	2.2354	2.4179e-06	6.3364e-05	up	sp|O81025|P2A03_ARATH Putative protein PHLOEM PROTEIN 2-LIKE A3 OS=Arabidopsis thaliana GN=PP2A3 PE=3 SV=1//2.78301e-28
Cla018005	743.771	344.631	1.1098	1.3379e-05	0.00028802	up	sp|Q8H7F6|GRS16_ARATH Bifunctional monothiol glutaredoxin-S16, chloroplastic OS=Arabidopsis thaliana GN=GRXS16 PE=1 SV=2//1.1956e-128
Cla018011	379.253	133.145	1.5102	1.0387e-07	3.6008e-06	up	sp|Q9C9H7|RLP12_ARATH Receptor-like protein 12 OS=Arabidopsis thaliana GN=RLP12 PE=2 SV=2//4.19967e-40
Cla018017	149.109	48.6034	1.6172	2.6394e-05	0.00052185	up	sp|O80920|PYL4_ARATH Abscisic acid receptor PYL4 OS=Arabidopsis thaliana GN=PYL4 PE=1 SV=1//2.14041e-81
Cla018034	14570.7	4133.69	1.8176	1.5069e-18	2.9038e-16	up	sp|Q9LZX1|LOR15_ARATH Protein LURP-one-related 15 OS=Arabidopsis thaliana GN=At5g01750 PE=1 SV=1//8.62727e-84
Cla018043	1641.88	953.128	0.78461	0.0030027	0.027323	up	sp|Q2MHE4|HT1_ARATH Serine/threonine-protein kinase HT1 OS=Arabidopsis thaliana GN=HT1 PE=1 SV=1//3.36606e-75
Cla018049	1124.5	566.754	0.98848	1.2798e-05	0.00027764	up	sp|Q5N1T5|EFP_SYNP6 Elongation factor P OS=Synechococcus sp. (strain ATCC 27144 / PCC 6301 / SAUG 1402/1) GN=efp PE=3 SV=1//1.61122e-32
Cla018067	869.726	411.25	1.0805	9.9193e-06	0.00022155	up	sp|Q9M385|RK17_ARATH 50S ribosomal protein L17, chloroplastic OS=Arabidopsis thaliana GN=RPL17 PE=2 SV=1//3.01728e-77
Cla018068	510.299	258.063	0.98362	0.00028403	0.0039705	up	-//-
Cla018070	575.116	289.537	0.9901	7.1085e-05	0.0012202	up	sp|Q9LT96|Y5977_ARATH Probable leucine-rich repeat receptor-like protein kinase At5g49770 OS=Arabidopsis thaliana GN=At5g49770 PE=2 SV=1//0
Cla018095	15043.2	8152.18	0.88385	1.7852e-05	0.00037209	up	sp|Q38833|CHLG_ARATH Chlorophyll synthase, chloroplastic OS=Arabidopsis thaliana GN=CHLG PE=2 SV=1//0
Cla018105	25816.8	9102.65	1.504	5.1639e-05	0.00092185	up	sp|Q93Z81|CAX3_ARATH Vacuolar cation/proton exchanger 3 OS=Arabidopsis thaliana GN=CAX3 PE=1 SV=1//0
Cla018106	232.304	87.543	1.4079	2.1424e-05	0.00043682	up	sp|O65023|EAAC_ARATH Probable envelope ADP,ATP carrier protein, chloroplastic OS=Arabidopsis thaliana GN=EAAC PE=2 SV=2//8.91833e-167
Cla018108	7417.71	3507.55	1.0805	6.145e-08	2.196e-06	up	sp|O49595|HMGB1_ARATH High mobility group B protein 1 OS=Arabidopsis thaliana GN=HMGB1 PE=1 SV=1//1.03016e-14
Cla018111	3850.47	1513.53	1.3471	1.0698e-10	6.1479e-09	up	sp|O80439|RR31_ARATH 30S ribosomal protein S31, chloroplastic OS=Arabidopsis thaliana GN=RPS31 PE=1 SV=1//2.47496e-13
Cla018117	2499.44	544.807	2.1978	3.3442e-10	1.7813e-08	up	sp|Q07473|CB4A_ARATH Chlorophyll a-b binding protein CP29.1, chloroplastic OS=Arabidopsis thaliana GN=LHCB4.1 PE=1 SV=1//3.72708e-166
Cla018120	37.2408	4.38615	3.0859	0.00021432	0.0031413	up	sp|Q9FF86|DCR_ARATH BAHD acyltransferase DCR OS=Arabidopsis thaliana GN=DCR PE=2 SV=1//2.65614e-66
Cla018131	8414.47	4127.38	1.0276	3.044e-07	9.5424e-06	up	sp|Q9Y2M2|SSUH2_HUMAN Protein SSUH2 homolog OS=Homo sapiens GN=SSUH2 PE=1 SV=1//2.82613e-27
Cla018135	1032.76	468.965	1.139	7.6478e-07	2.2105e-05	up	sp|P25851|F16P1_ARATH Fructose-1,6-bisphosphatase, chloroplastic OS=Arabidopsis thaliana GN=FBP PE=2 SV=2//1.29172e-93
Cla018136	818.332	433.726	0.9159	9.2667e-05	0.001528	up	sp|O64422|F16P1_ORYSJ Fructose-1,6-bisphosphatase, chloroplastic OS=Oryza sativa subsp. japonica GN=Os03g0267300 PE=2 SV=1//1.23638e-34
Cla018142	1460.13	830.144	0.81467	0.0021967	0.021417	up	sp|Q9SH93|IPCS2_ARATH Phosphatidylinositol:ceramide inositolphosphotransferase 2 OS=Arabidopsis thaliana GN=IPCS2 PE=2 SV=1//1.08266e-153
Cla018168	1246.08	600.104	1.0541	3.5233e-06	8.8783e-05	up	sp|O80792|RH33_ARATH Putative DEAD-box ATP-dependent RNA helicase 33 OS=Arabidopsis thaliana GN=RH33 PE=3 SV=1//3.53437e-13
Cla018228	466.719	279.343	0.74051	0.0047968	0.038879	up	sp|Q9LFF1|PP281_ARATH Pentatricopeptide repeat-containing protein At3g53700, chloroplastic OS=Arabidopsis thaliana GN=MEE40 PE=2 SV=1//0
Cla018232	1773.43	1161.93	0.61003	0.0037811	0.03261	up	sp|Q9LFF9|IPYR4_ARATH Soluble inorganic pyrophosphatase 4 OS=Arabidopsis thaliana GN=PPA4 PE=1 SV=1//1.20175e-133
Cla018240	1367.79	711.344	0.94323	3.8727e-05	0.00072841	up	sp|Q9LS48|SG1_ARATH protein SLOW GREEN 1, chloroplastic OS=Arabidopsis thaliana GN=SG1 PE=1 SV=1//1.9456e-34
Cla018313	465.084	107.738	2.11	8.737e-12	6.0044e-10	up	sp|Q9LD95|SIGF_ARATH RNA polymerase sigma factor sigF, chloroplastic OS=Arabidopsis thaliana GN=SIGF PE=1 SV=1//2.42521e-179
Cla018317	982.942	425.174	1.2091	3.5057e-07	1.0885e-05	up	sp|Q2RQZ4|ACYP_RHORT Acylphosphatase OS=Rhodospirillum rubrum (strain ATCC 11170 / ATH 1.1.1 / DSM 467 / LMG 4362 / NCIB 8255 / S1) GN=acyP PE=3 SV=1//9.86222e-24
Cla018327	895.881	427.334	1.0679	4.5382e-06	0.00011178	up	sp|O82413|SYHM_ARATH Histidine--tRNA ligase, chloroplastic/mitochondrial OS=Arabidopsis thaliana GN=At3g46100 PE=2 SV=1//0
Cla018347	526.836	299.64	0.81412	0.0017278	0.017679	up	sp|Q6TBX7|LUT1_ARATH Carotene epsilon-monooxygenase, chloroplastic OS=Arabidopsis thaliana GN=CYP97C1 PE=1 SV=1//0
Cla018357	1220.52	722.6	0.75623	0.0022997	0.022212	up	-//-
Cla018402	1947.93	914.333	1.0911	1.2407e-05	0.00026946	up	sp|P37107|SR54C_ARATH Signal recognition particle 54 kDa protein, chloroplastic OS=Arabidopsis thaliana GN=FFC PE=1 SV=1//0
Cla018406	5665.52	2285.44	1.3097	3.8078e-10	1.9905e-08	up	-//-
Cla018435	8301.65	4078.82	1.0252	3.8936e-07	1.1957e-05	up	-//-
Cla018437	327.897	111.339	1.5583	2.0536e-05	0.00042265	up	sp|Q9FX43|M2K9_ARATH Mitogen-activated protein kinase kinase 9 OS=Arabidopsis thaliana GN=MKK9 PE=1 SV=1//9.15623e-80
Cla018461	131.258	32.7449	2.0031	4.6995e-06	0.00011546	up	sp|Q9LDY5|FK172_ARATH Peptidyl-prolyl cis-trans isomerase FKBP17-2, chloroplastic OS=Arabidopsis thaliana GN=FKBP17-2 PE=1 SV=1//1.03586e-85
Cla018475	10675.8	4303.81	1.3107	0.00030694	0.0042337	up	-//-
Cla018514	2733.4	1683.01	0.69965	0.0011789	0.012787	up	sp|Q31QE7|CLPS_SYNE7 ATP-dependent Clp protease adapter protein ClpS OS=Synechococcus elongatus (strain PCC 7942) GN=clpS PE=3 SV=1//9.1743e-26
Cla018528	1006.8	331.154	1.6042	7.8446e-11	4.6163e-09	up	sp|Q9FN48|CAS_ARATH Calcium sensing receptor, chloroplastic OS=Arabidopsis thaliana GN=CAS PE=1 SV=1//3.35182e-160
Cla018546	517	207.356	1.3181	4.0845e-07	1.2389e-05	up	sp|Q94JW8|SPL6_ARATH Squamosa promoter-binding-like protein 6 OS=Arabidopsis thaliana GN=SPL6 PE=2 SV=2//3.66872e-48
Cla018557	1393.75	661.169	1.0759	2.4359e-06	6.3668e-05	up	-//-
Cla018558	3280.96	2097.42	0.6455	0.0021953	0.021417	up	sp|Q94F39|AFP3_ARATH Ninja-family protein AFP3 OS=Arabidopsis thaliana GN=AFP3 PE=1 SV=1//1.03258e-27
Cla018574	12444.6	8456.64	0.55736	0.0051554	0.040997	up	sp|Q9FNQ0|VIP4_ARATH Protein LEO1 homolog OS=Arabidopsis thaliana GN=VIP4 PE=1 SV=1//1.82265e-106
Cla018576	1411.34	910.201	0.63281	0.004514	0.037294	up	sp|Q39017|DGK1_ARATH Diacylglycerol kinase 1 OS=Arabidopsis thaliana GN=DGK1 PE=1 SV=2//0
Cla018586	1004.44	613.651	0.7109	0.0022545	0.02184	up	-//-
Cla018594	5435.34	2436.82	1.1574	1.6994e-08	6.7478e-07	up	sp|Q43157|RPE_SPIOL Ribulose-phosphate 3-epimerase, chloroplastic OS=Spinacia oleracea GN=RPE PE=1 SV=1//0
Cla018600	188.455	11.7863	3.999	4.6553e-15	5.289e-13	up	sp|Q9SQL2|CB24_PEA Chlorophyll a-b binding protein P4, chloroplastic OS=Pisum sativum GN=lhcA-P4 PE=1 SV=1//4.22051e-159
Cla018609	299.102	95.8307	1.6421	2.1075e-07	6.8469e-06	up	sp|Q9CA51|MIF1_ARATH Mini zinc finger protein 1 OS=Arabidopsis thaliana GN=MIF1 PE=1 SV=1//8.95111e-33
Cla018611	5332.66	2681.92	0.99159	2.1221e-06	5.6212e-05	up	-//-
Cla018629	2344.84	1058.29	1.1478	1.3512e-05	0.00029057	up	sp|Q9FZ89|Y1815_ARATH UPF0426 protein At1g28150, chloroplastic OS=Arabidopsis thaliana GN=At1g28150 PE=2 SV=1//1.07651e-15
Cla018647	1562.38	564.301	1.4692	5.4096e-06	0.00013033	up	-//-
Cla018649	8762.78	5216.29	0.74837	0.00035633	0.0047895	up	sp|Q6ZHE5|DCYD1_ORYSJ Putative D-cysteine desulfhydrase 1, mitochondrial OS=Oryza sativa subsp. japonica GN=Os02g0773300 PE=2 SV=2//4.49673e-172
Cla018653	749.011	423.201	0.82364	0.00095675	0.010764	up	sp|P0A9T5|TAS_SHIFL Protein tas OS=Shigella flexneri GN=tas PE=3 SV=1//4.40871e-105
Cla018695	880.419	508.966	0.79062	0.0017378	0.017762	up	-//-
Cla018710	48.4167	11.7499	2.0429	0.0017427	0.01778	up	sp|Q13231|CHIT1_HUMAN Chitotriosidase-1 OS=Homo sapiens GN=CHIT1 PE=1 SV=1//9.71493e-51
Cla018729	636.123	222.975	1.5124	5.3037e-09	2.281e-07	up	sp|P48627|FAD6C_BRANA Omega-6 fatty acid desaturase, chloroplastic OS=Brassica napus PE=2 SV=1//0
Cla018731	629.806	304.847	1.0468	2.0751e-05	0.00042619	up	sp|C0LGK9|Y2242_ARATH Probable LRR receptor-like serine/threonine-protein kinase At2g24230 OS=Arabidopsis thaliana GN=At2g24230 PE=2 SV=1//0
Cla018738	631.598	243.78	1.3734	1.5787e-07	5.295e-06	up	sp|Q8W4A5|APO2_ARATH APO protein 2, chloroplastic OS=Arabidopsis thaliana GN=APO2 PE=2 SV=1//0
Cla018740	4052.17	1753.68	1.2083	8.056e-09	3.3761e-07	up	sp|Q8GMT0|Y464_SYNE7 Nucleoid-associated protein Synpcc7942_0464 OS=Synechococcus elongatus (strain PCC 7942) GN=Synpcc7942_0464 PE=3 SV=2//8.90345e-20
Cla018749	521.399	161.633	1.6897	2.5058e-10	1.3605e-08	up	sp|Q9FG14|MYOB7_ARATH Myosin-binding protein 7 OS=Arabidopsis thaliana GN=MYOB7 PE=1 SV=1//2.13933e-14
Cla018755	3209.29	338.464	3.2452	5.0993e-40	5.5682e-37	up	sp|P23326|RK35_SPIOL 50S ribosomal protein L35, chloroplastic OS=Spinacia oleracea GN=RPL35 PE=1 SV=1//1.57305e-41
Cla018756	403.391	97.2557	2.0523	1.1389e-11	7.64e-10	up	-//-
Cla018757	114128	1322	6.4318	6.996e-145	1.3751e-140	up	sp|F4JKH6|TSS_ARATH Protein TSS OS=Arabidopsis thaliana GN=TSS PE=1 SV=1//0
Cla018758	3273.45	28.295	6.8541	3.9464e-35	3.1026e-32	up	sp|Q84N34|HHP2_ARATH Heptahelical transmembrane protein 2 OS=Arabidopsis thaliana GN=HHP2 PE=2 SV=1//1.05515e-128
Cla018780	53.5318	14.196	1.9149	0.0035623	0.031129	up	sp|Q9SKX1|IBH1_ARATH Transcription factor IBH1 OS=Arabidopsis thaliana GN=IBH1 PE=1 SV=1//9.35075e-06
Cla018797	829.135	55.1627	3.9098	1.2233e-41	1.603e-38	up	sp|Q9FHH8|COL5_ARATH Zinc finger protein CONSTANS-LIKE 5 OS=Arabidopsis thaliana GN=COL5 PE=2 SV=2//1.21849e-104
Cla018814	38318.2	14418.6	1.4101	7.9342e-06	0.00018368	up	sp|Q38857|XTH22_ARATH Xyloglucan endotransglucosylase/hydrolase protein 22 OS=Arabidopsis thaliana GN=XTH22 PE=1 SV=1//5.15089e-153
Cla018835	1611.59	685.282	1.2337	5.0446e-08	1.843e-06	up	sp|Q9CAF5|AB6I_ARATH ABC transporter I family member 6, chloroplastic OS=Arabidopsis thaliana GN=ABCI6 PE=1 SV=1//4.02073e-97
Cla018836	941.969	384.035	1.2944	1.479e-07	4.9947e-06	up	sp|Q9CAF5|AB6I_ARATH ABC transporter I family member 6, chloroplastic OS=Arabidopsis thaliana GN=ABCI6 PE=1 SV=1//5.09526e-42
Cla018839	1069.88	307.152	1.8004	1.0702e-06	2.988e-05	up	sp|Q5XF57|Y5576_ARATH Probable receptor-like serine/threonine-protein kinase At5g57670 OS=Arabidopsis thaliana GN=At5g57670 PE=2 SV=1//2.28043e-123
Cla018852	7473.13	5069.44	0.55989	0.00657	0.049552	up	-//-
Cla018887	127.78	59.8971	1.0931	0.0066331	0.049932	up	sp|Q7XPF7|HKT7_ORYSJ Probable cation transporter HKT7 OS=Oryza sativa subsp. japonica GN=HKT7 PE=2 SV=2//3.55961e-64
Cla018899	137.421	38.1653	1.8483	3.8109e-05	0.00072021	up	sp|C0LGU0|PRK1_ARATH Pollen receptor-like kinase 1 OS=Arabidopsis thaliana GN=PRK1 PE=1 SV=1//0
Cla018911	2739.82	765.315	1.84	5.0333e-17	7.6689e-15	up	-//-
Cla018913	4055.05	1509.14	1.426	2.5912e-12	1.9513e-10	up	-//-
Cla018921	3974.12	2237.22	0.82893	5.4441e-05	0.00096924	up	sp|Q9LVH5|OE64C_ARATH Outer envelope protein 64, chloroplastic OS=Arabidopsis thaliana GN=OEP64 PE=1 SV=1//0
Cla018923	7390.14	2971.29	1.3145	0.0049564	0.039811	up	sp|Q9LVH4|CAR4_ARATH Protein C2-DOMAIN ABA-RELATED 4 OS=Arabidopsis thaliana GN=CAR4 PE=1 SV=1//8.53738e-73
Cla018937	157.205	20.2106	2.9595	3.7207e-11	2.3142e-09	up	sp|Q9C9U3|DOX2_ARATH Alpha-dioxygenase 2 OS=Arabidopsis thaliana GN=DOX2 PE=2 SV=1//0
Cla018941	231.169	100.249	1.2054	0.00040655	0.0053665	up	-//-
Cla018957	492.318	84.3512	2.5451	5.2261e-19	1.0272e-16	up	sp|P82353|NLTP2_PRUAR Non-specific lipid-transfer protein 2 OS=Prunus armeniaca PE=1 SV=1//2.82503e-25
Cla018964	1282.27	288.549	2.1518	1.6019e-08	6.3863e-07	up	-//-
Cla018981	5797.54	1874.24	1.6291	6.6352e-15	7.368e-13	up	-//-
Cla019011	5836.21	3239.86	0.8491	3.5212e-05	0.00067258	up	sp|Q9FN50|CPP1_ARATH Protein CHAPERONE-LIKE PROTEIN OF POR1, chloroplastic OS=Arabidopsis thaliana GN=CPP1 PE=1 SV=1//2.9189e-129
Cla019037	3339.2	1125.48	1.569	2.5489e-13	2.2069e-11	up	sp|O13983|HRQ1_SCHPO Putative ATP-dependent helicase hrq1 OS=Schizosaccharomyces pombe (strain 972 / ATCC 24843) GN=hrq1 PE=3 SV=4//9.71936e-124
Cla019049	258.854	98.676	1.3914	0.00048909	0.0062425	up	sp|Q9S823|LNG2_ARATH Protein LONGIFOLIA 2 OS=Arabidopsis thaliana GN=LNG2 PE=1 SV=1//2.40434e-65
Cla019057	4717.25	1126.41	2.0662	8.2071e-07	2.3544e-05	up	sp|O48538|RBOHF_ARATH Respiratory burst oxidase homolog protein F OS=Arabidopsis thaliana GN=RBOHF PE=1 SV=1//0
Cla019077	287.85	154.637	0.89643	0.0020369	0.020159	up	sp|Q9S7P9|SNP33_ARATH SNAP25 homologous protein SNAP33 OS=Arabidopsis thaliana GN=SNAP33 PE=1 SV=1//5.20723e-99
Cla019084	397.891	114.94	1.7915	0.00040829	0.0053822	up	sp|Q9QY93|DCTP1_MOUSE dCTP pyrophosphatase 1 OS=Mus musculus GN=Dctpp1 PE=1 SV=1//1.04303e-24
Cla019105	1227.55	221.666	2.4693	8.6089e-24	2.8201e-21	up	sp|Q9SQL2|CB24_PEA Chlorophyll a-b binding protein P4, chloroplastic OS=Pisum sativum GN=lhcA-P4 PE=1 SV=1//1.44953e-151
Cla019107	2668.15	1776.95	0.58644	0.0037558	0.032462	up	sp|Q8LFV3|CDF3_ARATH Cyclic dof factor 3 OS=Arabidopsis thaliana GN=CDF3 PE=1 SV=2//6.36479e-99
Cla019109	10561.6	3749.12	1.4942	6.271e-13	5.0104e-11	up	sp|Q9ZS34|CHLP_TOBAC Geranylgeranyl diphosphate reductase, chloroplastic OS=Nicotiana tabacum GN=CHLP PE=2 SV=1//0
Cla019115	145.455	21.5884	2.7522	0.00013626	0.002129	up	sp|P81392|MYB06_ANTMA Myb-related protein 306 OS=Antirrhinum majus GN=MYB306 PE=2 SV=1//2.548e-85
Cla019122	2602.61	1329.28	0.96932	7.8612e-06	0.00018221	up	sp|Q9STT2|VPS29_ARATH Vacuolar protein sorting-associated protein 29 OS=Arabidopsis thaliana GN=VPS29 PE=2 SV=1//1.15628e-124
Cla019136	1145.07	365.38	1.648	1.1188e-11	7.5305e-10	up	sp|Q8GYP6|PPR49_ARATH Pentatricopeptide repeat-containing protein At1g18900 OS=Arabidopsis thaliana GN=At1g18900 PE=2 SV=1//0
Cla019146	118.693	45.2942	1.3898	0.0013283	0.01422	up	sp|Q86A88|DYL_DICDI Dynein light chain, cytoplasmic OS=Dictyostelium discoideum GN=dlcB PE=3 SV=1//6.12753e-22
Cla019170	1817.22	1231.56	0.56124	0.0061292	0.047132	up	sp|Q94JX5|WLIM1_ARATH LIM domain-containing protein WLIM1 OS=Arabidopsis thaliana GN=WLIM1 PE=1 SV=1//2.46394e-93
Cla019188	13007.2	7231.24	0.84699	1.5464e-05	0.00032787	up	sp|Q94AT5|EXEC2_ARATH Protein EXECUTER 2, chloroplastic OS=Arabidopsis thaliana GN=EX2 PE=2 SV=1//0
Cla019194	1884.91	1145.23	0.71886	0.0005306	0.0066639	up	-//-
Cla019223	317.471	33.4339	3.2472	2.3835e-18	4.3783e-16	up	sp|Q8LPH6|MYB86_ARATH Transcription factor MYB86 OS=Arabidopsis thaliana GN=MYB86 PE=2 SV=1//1.18735e-77
Cla019235	5551.69	2029.68	1.4517	1.8395e-12	1.4068e-10	up	sp|Q43467|EFTU1_SOYBN Elongation factor Tu, chloroplastic OS=Glycine max GN=TUFA PE=3 SV=1//0
Cla019236	2693.08	818.475	1.7182	2.0482e-15	2.5117e-13	up	sp|Q0WWT7|STR11_ARATH Rhodanese-like domain-containing protein 11, chloroplastic OS=Arabidopsis thaliana GN=STR11 PE=2 SV=1//1.39689e-143
Cla019239	4092.2	1392.33	1.5554	3.264e-13	2.7772e-11	up	sp|Q04836|CP31A_ARATH 31 kDa ribonucleoprotein, chloroplastic OS=Arabidopsis thaliana GN=CP31A PE=1 SV=1//2.55459e-104
Cla019251	357	188.279	0.92306	0.0019371	0.019298	up	sp|Q94K71|GPPL2_ARATH Haloacid dehalogenase-like hydrolase domain-containing protein At3g48420 OS=Arabidopsis thaliana GN=At3g48420 PE=1 SV=1//1.9436e-160
Cla019260	1007.69	652.746	0.62646	0.0065147	0.049307	up	sp|F4JF21|PTA10_ARATH Protein PLASTID TRANSCRIPTIONALLY ACTIVE 10 OS=Arabidopsis thaliana GN=PTAC10 PE=1 SV=1//0
Cla019268	1707.68	1011.61	0.75538	0.00026618	0.0037571	up	sp|P54122|RNJ_CORGL Ribonuclease J OS=Corynebacterium glutamicum (strain ATCC 13032 / DSM 20300 / JCM 1318 / LMG 3730 / NCIMB 10025) GN=rnj PE=3 SV=2//1.48907e-64
Cla019279	338.293	197.347	0.77754	0.0059974	0.046406	up	sp|Q9SMP0|NFYC1_ARATH Nuclear transcription factor Y subunit C-1 OS=Arabidopsis thaliana GN=NFYC1 PE=1 SV=1//1.08937e-85
Cla019290	3147.31	1866.9	0.75347	0.00046698	0.005999	up	sp|Q9S760|HA22D_ARATH HVA22-like protein d OS=Arabidopsis thaliana GN=HVA22D PE=2 SV=1//4.55813e-55
Cla019316	337.802	147.59	1.1946	0.0010038	0.011191	up	sp|P04170|RUBR1_DESDA Rubredoxin-1 OS=Desulfovibrio desulfuricans (strain ATCC 27774 / DSM 6949) GN=rd1 PE=1 SV=1//2.19016e-07
Cla019320	14479.1	6876.1	1.0743	8.2891e-08	2.8938e-06	up	sp|P35100|CLPC_PEA Chaperone protein ClpC, chloroplastic OS=Pisum sativum PE=2 SV=1//0
Cla019322	6230.89	1776.52	1.8104	3.5682e-17	5.5661e-15	up	sp|Q9SW18|CHLM_ARATH Magnesium protoporphyrin IX methyltransferase, chloroplastic OS=Arabidopsis thaliana GN=CHLM PE=1 SV=1//4.21811e-142
Cla019336	2522.92	1505.98	0.74439	0.00042366	0.0055477	up	sp|A9VRF5|PUR9_BACWK Bifunctional purine biosynthesis protein PurH OS=Bacillus weihenstephanensis (strain KBAB4) GN=purH PE=3 SV=1//2.05338e-166
Cla019342	252.078	130.233	0.95278	0.0021909	0.021403	up	sp|Q9C7A2|Y3236_ARATH Ankyrin repeat-containing protein At3g12360 OS=Arabidopsis thaliana GN=At3g12360 PE=2 SV=1//2.83738e-10
Cla019343	227.797	107.3	1.0861	0.0005969	0.0073006	up	sp|Q9C7A2|Y3236_ARATH Ankyrin repeat-containing protein At3g12360 OS=Arabidopsis thaliana GN=At3g12360 PE=2 SV=1//6.09688e-14
Cla019380	2778.83	605.395	2.1985	2.1786e-17	3.5684e-15	up	sp|Q01908|ATPG1_ARATH ATP synthase gamma chain 1, chloroplastic OS=Arabidopsis thaliana GN=ATPC1 PE=1 SV=1//0
Cla019382	708.36	156.734	2.1762	2.8805e-07	9.09e-06	up	sp|Q9SB81|PER42_ARATH Peroxidase 42 OS=Arabidopsis thaliana GN=PER42 PE=1 SV=2//0
Cla019388	7089.87	4796.5	0.56378	0.0050911	0.040644	up	sp|Q9ZS97|AB8I_ARATH UPF0051 protein ABCI8, chloroplastic OS=Arabidopsis thaliana GN=ABCI8 PE=2 SV=1//0
Cla019390	155.846	75.0888	1.0534	0.0046113	0.037844	up	sp|O49710|HS154_ARATH 15.4 kDa class V heat shock protein OS=Arabidopsis thaliana GN=HSP15.4 PE=2 SV=1//1.46229e-14
Cla019406	2851.32	687.5	2.0522	3.3755e-20	7.8982e-18	up	sp|Q8GVP6|PDRP1_ORYSJ Probable pyruvate, phosphate dikinase regulatory protein, chloroplastic OS=Oryza sativa subsp. japonica GN=PDRP1 PE=2 SV=2//6.3075e-167
Cla019419	384.025	23.091	4.0558	2.1544e-06	5.699e-05	up	sp|Q8S9L6|CRK29_ARATH Cysteine-rich receptor-like protein kinase 29 OS=Arabidopsis thaliana GN=CRK29 PE=2 SV=1//1.31691e-138
Cla019421	50831.4	19748.4	1.364	4.5512e-09	1.9923e-07	up	sp|Q8LDI5|CXXS1_ARATH Thioredoxin-like protein CXXS1 OS=Arabidopsis thaliana GN=CXXS1 PE=2 SV=2//2.43289e-51
Cla019423	15733.3	1352.68	3.5399	2.9999e-19	6.2009e-17	up	sp|Q41932|PSBQ2_ARATH Oxygen-evolving enhancer protein 3-2, chloroplastic OS=Arabidopsis thaliana GN=PSBQ2 PE=1 SV=2//3.476e-83
Cla019454	564.674	74.8943	2.9145	2.4423e-16	3.3568e-14	up	sp|Q41144|STC_RICCO Sugar carrier protein C OS=Ricinus communis GN=STC PE=2 SV=1//0
Cla019461	76.0538	22.5796	1.752	0.0011907	0.012894	up	-//-
Cla019464	6929.7	767.048	3.1754	7.8364e-47	1.2835e-43	up	sp|Q38945|DPNPH_ARATH PAP-specific phosphatase HAL2-like OS=Arabidopsis thaliana GN=AHL PE=2 SV=1//2.14742e-163
Cla019500	982.95	624.614	0.65415	0.0060213	0.046484	up	sp|Q9SKU6|PP166_ARATH Pentatricopeptide repeat-containing protein At2g20710, mitochondrial OS=Arabidopsis thaliana GN=At2g20710 PE=2 SV=1//3.49831e-109
Cla019504	571.11	75.5896	2.9175	7.9983e-23	2.3119e-20	up	sp|Q9FNJ9|CA1P_ARATH Probable 2-carboxy-D-arabinitol-1-phosphatase OS=Arabidopsis thaliana GN=At5g22620 PE=1 SV=1//8.44842e-55
Cla019553	1564.23	858.073	0.86628	0.00079173	0.0092298	up	sp|Q0WQ57|AUXI2_ARATH Auxilin-related protein 2 OS=Arabidopsis thaliana GN=At4g12770 PE=1 SV=1//1.12183e-33
Cla019554	508.444	100.962	2.3323	8.5897e-16	1.0963e-13	up	-//-
Cla019560	1749.3	1079.66	0.69621	0.0017755	0.018034	up	-//-
Cla019594	5931.1	1583.6	1.9051	1.5095e-16	2.15e-14	up	sp|O49726|PUP9_ARATH Probable purine permease 9 OS=Arabidopsis thaliana GN=PUP9 PE=2 SV=2//7.05143e-137
Cla019599	1915.1	1245.86	0.62028	0.0035041	0.0307	up	sp|Q9FKK2|AGL62_ARATH Agamous-like MADS-box protein AGL62 OS=Arabidopsis thaliana GN=AGL62 PE=1 SV=1//1.63216e-24
Cla019615	4784.74	1978.16	1.2743	1.7623e-09	8.3064e-08	up	sp|F4I1G5|CRIM2_ARATH Cold-regulated 413 inner membrane protein 2, chloroplastic OS=Arabidopsis thaliana GN=COR413IM2 PE=1 SV=1//1.45309e-84
Cla019631	930.722	527.427	0.81938	0.0003524	0.0047539	up	sp|P42527|MHCKA_DICDI Myosin heavy chain kinase A OS=Dictyostelium discoideum GN=mhkA PE=1 SV=2//4.14008e-10
Cla019644	5572.71	3742.55	0.57436	0.0063885	0.04865	up	sp|Q9LQI7|CIA30_ARATH Probable complex I intermediate-associated protein 30 OS=Arabidopsis thaliana GN=At1g17350 PE=1 SV=2//6.42498e-06
Cla019674	3681.52	2092.95	0.81477	7.5983e-05	0.0012905	up	sp|Q08448|YO059_YEAST Putative lipase YOR059C OS=Saccharomyces cerevisiae (strain ATCC 204508 / S288c) GN=YOR059C PE=1 SV=1//1.60122e-14
Cla019694	283.388	79.1187	1.8407	2.3242e-05	0.00046901	up	sp|Q9SGP2|HSL1_ARATH Receptor-like protein kinase HSL1 OS=Arabidopsis thaliana GN=HSL1 PE=2 SV=1//0
Cla019724	14.068	0	Inf	0.0014045	0.014874	up	sp|Q8GTB6|THCAS_CANSA Tetrahydrocannabinolic acid synthase OS=Cannabis sativa PE=1 SV=1//5.54965e-149
Cla019741	1044.6	204.084	2.3557	2.4741e-14	2.4685e-12	up	sp|Q8GTB6|THCAS_CANSA Tetrahydrocannabinolic acid synthase OS=Cannabis sativa PE=1 SV=1//1.3401e-166
Cla019761	2448.65	1613.55	0.60174	0.005382	0.042483	up	sp|Q0WRY5|CDL1_ARATH Serine/threonine-protein kinase CDL1 OS=Arabidopsis thaliana GN=CDL1 PE=1 SV=1//4.09338e-64
Cla019791	4523.66	2080.2	1.1208	5.7713e-08	2.07e-06	up	sp|Q84ZT9|WVD2_ARATH Protein WAVE-DAMPENED 2 OS=Arabidopsis thaliana GN=WVD2 PE=2 SV=1//6.89162e-41
Cla019793	2943.15	1613.13	0.8675	4.3804e-05	0.00080767	up	sp|P37218|H1_SOLLC Histone H1 OS=Solanum lycopersicum PE=3 SV=1//1.32916e-17
Cla019799	5154.29	2354.7	1.1302	0.00027616	0.0038744	up	sp|Q41387|PSBW_SPIOL Photosystem II reaction center W protein, chloroplastic OS=Spinacia oleracea GN=psbW PE=1 SV=1//1.16443e-19
Cla019806	25093.4	11732.6	1.0968	6.9327e-05	0.0011953	up	sp|O24542|AX22D_VIGRR Auxin-induced protein 22D OS=Vigna radiata var. radiata GN=AUX22D PE=2 SV=1//2.46663e-79
Cla019827	437.808	263.073	0.73483	0.004813	0.038962	up	-//-
Cla019828	486.8	210.661	1.2084	5.2794e-06	0.00012764	up	sp|P73068|RUBR_SYNY3 Rubredoxin OS=Synechocystis sp. (strain PCC 6803 / Kazusa) GN=rub PE=3 SV=1//1.56711e-18
Cla019850	698.28	381.48	0.8722	0.0038637	0.033099	up	-//-
Cla019859	1283.99	469.382	1.4518	4.7017e-10	2.4128e-08	up	sp|Q9ZVL6|U603_ARATH UPF0603 protein At1g54780, chloroplastic OS=Arabidopsis thaliana GN=At1g54780 PE=1 SV=1//2.93188e-130
Cla019891	1672.39	706.72	1.2427	2.5153e-08	9.6748e-07	up	-//-
Cla019913	868.664	268.496	1.6939	3.5981e-06	9.0319e-05	up	sp|F4J7A7|PPD7_ARATH PsbP domain-containing protein 7, chloroplastic OS=Arabidopsis thaliana GN=PPD7 PE=2 SV=1//3.56572e-118
Cla019925	4278.84	2426.73	0.8182	7.9806e-05	0.0013453	up	sp|Q8L770|CLPR3_ARATH ATP-dependent Clp protease proteolytic subunit-related protein 3, chloroplastic OS=Arabidopsis thaliana GN=CLPR3 PE=1 SV=1//3.39757e-141
Cla019933	299.02	115.79	1.3687	7.8128e-06	0.00018173	up	sp|Q9LZB2|GDL74_ARATH GDSL esterase/lipase At5g03980 OS=Arabidopsis thaliana GN=At5g03980 PE=2 SV=1//2.34651e-58
Cla019968	21.0881	0.408263	5.6908	0.00022271	0.0032425	up	sp|Q9FF79|NAS1_ARATH Nicotianamine synthase 1 OS=Arabidopsis thaliana GN=NAS1 PE=2 SV=1//2.19503e-108
Cla019991	41.019	5.00069	3.0361	0.0002146	0.0031431	up	-//-
Cla019999	541.287	142.659	1.9238	0.00018114	0.0027219	up	sp|Q8LPH6|MYB86_ARATH Transcription factor MYB86 OS=Arabidopsis thaliana GN=MYB86 PE=2 SV=1//2.4181e-83
Cla020005	40896.8	25212.6	0.69784	0.00057243	0.0070628	up	sp|Q9FPS4|UBP23_ARATH Ubiquitin carboxyl-terminal hydrolase 23 OS=Arabidopsis thaliana GN=UBP23 PE=2 SV=2//4.44252e-11
Cla020022	2013.88	914.351	1.1392	1.2355e-07	4.2159e-06	up	sp|B0JKQ1|IF3_MICAN Translation initiation factor IF-3 OS=Microcystis aeruginosa (strain NIES-843) GN=infC PE=3 SV=1//3.79494e-27
Cla020039	34.7137	7.28015	2.2535	0.0064604	0.049008	up	sp|Q9LHE3|ASPG2_ARATH Protein ASPARTIC PROTEASE IN GUARD CELL 2 OS=Arabidopsis thaliana GN=ASPG2 PE=2 SV=1//4.13498e-166
Cla020047	229.793	74.3671	1.6276	1.0829e-06	3.0191e-05	up	sp|Q8VZR0|RIBF2_ARATH FAD synthetase 2, chloroplastic OS=Arabidopsis thaliana GN=RIBF2 PE=1 SV=1//2.76073e-124
Cla020058	10605.7	4041.68	1.3918	7.9094e-12	5.4739e-10	up	sp|Q9FMX7|NIC2_ARATH Nicotinamidase 2 OS=Arabidopsis thaliana GN=NIC2 PE=1 SV=1//1.7509e-89
Cla020066	4534.24	1967.68	1.2044	7.04e-09	2.9694e-07	up	sp|Q10M00|C3H22_ORYSJ Zinc finger CCCH domain-containing protein 22 OS=Oryza sativa subsp. japonica GN=Os03g0328900 PE=2 SV=2//1.4873e-132
Cla020083	2080.28	758.116	1.4563	8.3615e-11	4.8767e-09	up	sp|O80362|RK10_TOBAC 50S ribosomal protein L10, chloroplastic OS=Nicotiana tabacum GN=RPL10 PE=2 SV=1//2.08996e-114
Cla020090	1592.58	755.699	1.0755	1.7137e-06	4.6142e-05	up	sp|Q8H8U5|IN21B_ORYSJ Protein IN2-1 homolog B OS=Oryza sativa subsp. japonica GN=GSTZ5 PE=2 SV=1//1.41482e-89
Cla020121	14857.8	5328.33	1.4795	2.6918e-13	2.3205e-11	up	sp|Q94ID7|GGPPS_HEVBR Geranylgeranyl pyrophosphate synthase, chloroplastic OS=Hevea brasiliensis GN=GGPS PE=1 SV=1//8.02438e-165
Cla020137	465.294	200.805	1.2123	9.148e-06	0.00020715	up	sp|Q9ZU29|PP139_ARATH Pentatricopeptide repeat-containing protein At2g01390 OS=Arabidopsis thaliana GN=At2g01390/At2g01380 PE=2 SV=2//0
Cla020193	157.066	47.7916	1.7165	4.0488e-05	0.00075288	up	sp|Q9FHA7|HEC1_ARATH Transcription factor HEC1 OS=Arabidopsis thaliana GN=HEC1 PE=1 SV=1//4.9116e-41
Cla020207	2160.94	587.65	1.8786	5.5996e-16	7.3374e-14	up	sp|Q8LDU4|RCCR_ARATH Red chlorophyll catabolite reductase, chloroplastic OS=Arabidopsis thaliana GN=RCCR PE=1 SV=2//4.30276e-87
Cla020214	10007.9	6026.54	0.73173	0.00027151	0.0038173	up	sp|O81360|ABA2_PRUAR Zeaxanthin epoxidase, chloroplastic OS=Prunus armeniaca PE=2 SV=1//0
Cla020225	1592.04	1038.44	0.61646	0.0044285	0.036707	up	sp|P51273|YCF36_PORPU Uncharacterized protein ycf36 OS=Porphyra purpurea GN=ycf36 PE=3 SV=1//3.5324e-27
Cla020227	1398.29	461.605	1.5989	3.5839e-09	1.6046e-07	up	sp|Q66GP0|Y5738_ARATH BTB/POZ domain-containing protein At5g67385 OS=Arabidopsis thaliana GN=At5g67385 PE=1 SV=2//1.86903e-53
Cla020246	1403.52	425.35	1.7223	1.8189e-13	1.5889e-11	up	-//-
Cla020249	1083.06	541.189	1.0009	1.6646e-05	0.00035029	up	sp|O81004|Y2287_ARATH GTP-binding protein At2g22870 OS=Arabidopsis thaliana GN=EMB2001 PE=2 SV=2//2.12177e-151
Cla020273	842.728	466.78	0.85233	0.00023531	0.0033958	up	sp|Q68CP4|HGNAT_HUMAN Heparan-alpha-glucosaminide N-acetyltransferase OS=Homo sapiens GN=HGSNAT PE=1 SV=2//6.4046e-28
Cla020286	3559.31	2115.66	0.75049	0.00015257	0.0023575	up	-//-
Cla020291	1483.48	973.861	0.6072	0.0040869	0.034622	up	sp|Q54IJ2|CTLHA_DICDI CTL-like protein DDB_G0288717 OS=Dictyostelium discoideum GN=DDB_G0288717 PE=3 SV=1//1.55989e-06
Cla020328	1146.61	631.662	0.86014	0.00014085	0.0021903	up	sp|Q9CAA7|PUB42_ARATH Putative U-box domain-containing protein 42 OS=Arabidopsis thaliana GN=PUB42 PE=2 SV=1//0
Cla020331	73.4907	22.7269	1.6932	0.0015731	0.016376	up	-//-
Cla020362	2402.25	1519.25	0.66103	0.0017983	0.018201	up	sp|Q5EA37|CC130_BOVIN Coiled-coil domain-containing protein 130 OS=Bos taurus GN=CCDC130 PE=2 SV=1//5.6811e-71
Cla020364	133.558	23.5528	2.5035	0.00039339	0.0052138	up	sp|Q9S7Y1|BH030_ARATH Transcription factor bHLH30 OS=Arabidopsis thaliana GN=BHLH30 PE=1 SV=1//1.0502e-71
Cla020368	164.553	48.4536	1.7639	2.0593e-05	0.00042337	up	sp|P82280|RAV2_ARATH AP2/ERF and B3 domain-containing transcription repressor RAV2 OS=Arabidopsis thaliana GN=RAV2 PE=2 SV=1//3.45289e-133
Cla020392	1750.26	1129.34	0.6321	0.0034826	0.030613	up	sp|Q9CA27|EF118_ARATH Ethylene-responsive transcription factor ERF118 OS=Arabidopsis thaliana GN=ERF118 PE=2 SV=1//4.49098e-33
Cla020402	1260.79	538.329	1.2278	1.0015e-07	3.4777e-06	up	sp|P25873|RK15_ARATH 50S ribosomal protein L15, chloroplastic OS=Arabidopsis thaliana GN=RPL15 PE=2 SV=2//4.86994e-102
Cla020433	3251.55	1665.51	0.96516	1.7011e-05	0.00035644	up	sp|Q94G17|TATC_PEA Sec-independent protein translocase protein TATC, chloroplastic OS=Pisum sativum GN=TATC PE=1 SV=1//2.86511e-128
Cla020437	1201.41	606.2	0.98686	1.1562e-05	0.00025363	up	sp|P43394|K502_ACTDE Fruit protein pKIWI502 OS=Actinidia deliciosa GN=pKIWI502 PE=2 SV=1//2.48176e-85
Cla020446	149.393	24.4722	2.6099	0.00031127	0.0042843	up	-//-
Cla020447	3972.59	2639.06	0.59006	0.0025768	0.024279	up	sp|Q9ZU35|AB7G_ARATH ABC transporter G family member 7 OS=Arabidopsis thaliana GN=ABCG7 PE=2 SV=1//0
Cla020449	7769.37	3174.98	1.291	2.7033e-10	1.4557e-08	up	sp|Q55EX9|Y8948_DICDI Putative methyltransferase DDB_G0268948 OS=Dictyostelium discoideum GN=DDB_G0268948 PE=1 SV=2//8.23695e-17
Cla020467	22310.9	10974.8	1.0236	5.9856e-07	1.7638e-05	up	sp|Q68FF9|S5A1_MOUSE 3-oxo-5-alpha-steroid 4-dehydrogenase 1 OS=Mus musculus GN=Srd5a1 PE=2 SV=2//5.48499e-21
Cla020487	1079.67	635.704	0.76416	0.00093154	0.010541	up	-//-
Cla020495	1243	560.37	1.1494	7.4675e-07	2.1678e-05	up	sp|B9RAJ0|DNPEP_RICCO Probable aspartyl aminopeptidase OS=Ricinus communis GN=RCOM_1506700 PE=2 SV=2//1.44616e-168
Cla020496	1515.52	967.895	0.64689	0.0031605	0.028365	up	sp|Q99JF5|MVD1_MOUSE Diphosphomevalonate decarboxylase OS=Mus musculus GN=Mvd PE=1 SV=2//5.75889e-105
Cla020499	4604.74	2281.46	1.0132	2.1619e-06	5.7113e-05	up	sp|Q9FK88|INVE_ARATH Alkaline/neutral invertase E, chloroplastic OS=Arabidopsis thaliana GN=INVE PE=1 SV=1//0
Cla020507	78.374	19.0225	2.0427	0.00010406	0.0016881	up	sp|Q9LZS0|PTL_ARATH Trihelix transcription factor PTL OS=Arabidopsis thaliana GN=PTL PE=2 SV=1//4.20177e-59
Cla020510	23504.3	12122.3	0.95526	1.5041e-06	4.1231e-05	up	sp|Q8LBZ4|OTU_ARATH OTU domain-containing protein At3g57810 OS=Arabidopsis thaliana GN=At3g57810 PE=2 SV=1//1.07813e-62
Cla020526	7608.62	3761.57	1.0163	9.9339e-05	0.0016217	up	sp|O48902|MDHP_MEDSA Malate dehydrogenase [NADP], chloroplastic OS=Medicago sativa GN=MDH1 PE=2 SV=1//0
Cla020541	503.721	220	1.1951	0.00041734	0.0054832	up	-//-
Cla020546	18896.1	11528.4	0.7129	0.00031695	0.0043473	up	sp|P47082|AVT1_YEAST Vacuolar amino acid transporter 1 OS=Saccharomyces cerevisiae (strain ATCC 204508 / S288c) GN=AVT1 PE=1 SV=1//2.26722e-32
Cla020563	187.503	5.13892	5.1893	7.6761e-12	5.3397e-10	up	sp|Q9SV31|PIP25_ARATH Probable aquaporin PIP2-5 OS=Arabidopsis thaliana GN=PIP2-5 PE=1 SV=1//2.08725e-169
Cla020577	2605.63	1606.48	0.69773	0.0010737	0.01179	up	sp|Q9SF32|IQD1_ARATH Protein IQ-DOMAIN 1 OS=Arabidopsis thaliana GN=IQD1 PE=1 SV=1//1.27426e-64
Cla020588	459.475	175.658	1.3872	8.3016e-07	2.3716e-05	up	sp|Q9CAA7|PUB42_ARATH Putative U-box domain-containing protein 42 OS=Arabidopsis thaliana GN=PUB42 PE=2 SV=1//1.8643e-23
Cla020604	8257.78	5485.96	0.59001	0.0032875	0.029264	up	sp|Q5S1U6|IFRD1_PIG Interferon-related developmental regulator 1 OS=Sus scrofa GN=IFRD1 PE=2 SV=1//2.35933e-34
Cla020616	2943.62	1838.76	0.67886	0.0013876	0.014719	up	sp|Q9STX2|VEP1_ARATH 3-oxo-Delta(4,5)-steroid 5-beta-reductase OS=Arabidopsis thaliana GN=VEP1 PE=1 SV=1//0
Cla020633	3705.37	2136.83	0.79415	5.832e-05	0.0010281	up	sp|Q9FDW1|MYB44_ARATH Transcription factor MYB44 OS=Arabidopsis thaliana GN=MYB44 PE=2 SV=1//1.01776e-70
Cla020653	1427.01	896.986	0.66984	0.0024271	0.023124	up	sp|Q9SND9|Y3028_ARATH Uncharacterized acetyltransferase At3g50280 OS=Arabidopsis thaliana GN=At3g50280 PE=3 SV=1//5.94959e-72
Cla020655	2001.88	1125.54	0.83075	0.00014199	0.0022061	up	sp|Q9LJW3|NAC59_ARATH NAC domain-containing protein 59 OS=Arabidopsis thaliana GN=NAC59 PE=1 SV=1//7.53505e-12
Cla020670	1248.25	595.646	1.0674	4.219e-06	0.0001047	up	sp|Q42463|DCL_SOLLC Protein DCL, chloroplastic OS=Solanum lycopersicum GN=DCL PE=2 SV=1//5.12394e-64
Cla020690	258.133	96.8169	1.4148	1.679e-05	0.00035295	up	sp|O48722|HMOX2_ARATH Probable inactive heme oxygenase 2, chloroplastic OS=Arabidopsis thaliana GN=HO2 PE=2 SV=2//8.02865e-106
Cla020705	349.359	109.5	1.6738	5.199e-05	0.00092645	up	sp|Q9SZA7|DRL29_ARATH Probable disease resistance protein At4g33300 OS=Arabidopsis thaliana GN=At4g33300 PE=2 SV=3//0
Cla020717	501.433	154.861	1.6951	0.0023566	0.022616	up	sp|Q9SZ46|C82C4_ARATH Cytochrome P450 82C4 OS=Arabidopsis thaliana GN=CYP82C4 PE=2 SV=1//7.67519e-163
Cla020726	2711.91	498.613	2.4433	3.1588e-05	0.00060845	up	sp|Q9SZ46|C82C4_ARATH Cytochrome P450 82C4 OS=Arabidopsis thaliana GN=CYP82C4 PE=2 SV=1//4.47017e-152
Cla020727	24770.1	12162.8	1.0261	2.1388e-05	0.00043653	up	sp|O49858|C82A3_SOYBN Cytochrome P450 82A3 OS=Glycine max GN=CYP82A3 PE=2 SV=1//4.74324e-162
Cla020737	1636.64	268.394	2.6083	4.8538e-27	2.3268e-24	up	sp|P82278|RR9_SPIOL 30S ribosomal protein S9, chloroplastic (Fragment) OS=Spinacia oleracea GN=PRPS9 PE=1 SV=1//4.80151e-86
Cla020738	211.212	73.1562	1.5296	0.003849	0.033036	up	sp|Q8L3R2|CML41_ARATH Probable calcium-binding protein CML41 OS=Arabidopsis thaliana GN=CML41 PE=2 SV=2//5.04074e-29
Cla020758	1385.13	855.649	0.69494	0.0016127	0.016674	up	sp|Q9UU99|YJX4_SCHPO CRAL-TRIO domain-containing protein C23B6.04c OS=Schizosaccharomyces pombe (strain 972 / ATCC 24843) GN=SPCC23B6.04c PE=1 SV=1//4.31258e-31
Cla020769	37.138	2.2583	4.0396	2.1095e-05	0.00043235	up	sp|Q6NNN0|RADL3_ARATH Protein RADIALIS-like 3 OS=Arabidopsis thaliana GN=RL3 PE=2 SV=1//6.90069e-26
Cla020783	2152.02	1042.35	1.0459	3.583e-05	0.00068373	up	sp|P55233|GLGL1_BETVU Glucose-1-phosphate adenylyltransferase large subunit, chloroplastic/amyloplastic OS=Beta vulgaris GN=AGPS1 PE=2 SV=1//0
Cla020784	1191.59	401.679	1.5688	3.9512e-11	2.4345e-09	up	sp|Q9FWS4|RK31_ARATH 50S ribosomal protein L31, chloroplastic OS=Arabidopsis thaliana GN=RPL31 PE=2 SV=1//3.31553e-59
Cla020788	23270.3	11621	1.0018	4.0677e-07	1.2376e-05	up	sp|Q93VH2|BBD2_ARATH Bifunctional nuclease 2 OS=Arabidopsis thaliana GN=BBD2 PE=2 SV=1//1.44409e-145
Cla020790	9149.26	3078.48	1.5714	1.8094e-07	5.9571e-06	up	sp|Q94CD1|HHT1_ARATH Omega-hydroxypalmitate O-feruloyl transferase OS=Arabidopsis thaliana GN=HHT1 PE=1 SV=1//6.99039e-35
Cla020793	978.671	267.895	1.8692	7.6883e-12	5.3397e-10	up	sp|Q9SRQ2|CHAT_ARATH (Z)-3-hexen-1-ol acetyltransferase OS=Arabidopsis thaliana GN=CHAT PE=1 SV=1//1.91877e-17
Cla020796	3148.39	1533.14	1.0381	6.056e-07	1.7819e-05	up	sp|D3FTV4|HFLX_BACPE GTPase HflX OS=Bacillus pseudofirmus (strain OF4) GN=hflX PE=3 SV=1//6.40223e-74
Cla020799	2444.6	1265.26	0.95016	6.2856e-06	0.00014867	up	sp|P36774|LON2_MYXXA Lon protease 2 OS=Myxococcus xanthus GN=lon2 PE=1 SV=3//1.88155e-10
Cla020802	35.4253	0.408263	6.4391	3.9082e-07	1.1965e-05	up	sp|Q94AP3|WAT1_ARATH Protein WALLS ARE THIN 1 OS=Arabidopsis thaliana GN=WAT1 PE=1 SV=1//2.88979e-138
Cla020831	18591.2	6239.15	1.5752	3.25e-14	3.1623e-12	up	-//-
Cla020845	426.165	229.075	0.89559	0.0011808	0.012801	up	-//-
Cla020861	787.837	487.304	0.69308	0.003621	0.031547	up	sp|Q17QR8|HARB1_BOVIN Putative nuclease HARBI1 OS=Bos taurus GN=HARBI1 PE=2 SV=1//6.2709e-22
Cla020876	933.629	379.629	1.2983	5.1679e-08	1.8845e-06	up	sp|Q84KI6|SQD1_SPIOL UDP-sulfoquinovose synthase, chloroplastic OS=Spinacia oleracea GN=SQD1 PE=1 SV=1//0
Cla020883	979.919	455.616	1.1048	3.3598e-06	8.499e-05	up	sp|P51273|YCF36_PORPU Uncharacterized protein ycf36 OS=Porphyra purpurea GN=ycf36 PE=3 SV=1//3.19734e-31
Cla020886	204.69	13.8576	3.8847	2.4349e-18	4.4314e-16	up	sp|O80992|PYL2_ARATH Abscisic acid receptor PYL2 OS=Arabidopsis thaliana GN=PYL2 PE=1 SV=1//4.30861e-91
Cla020897	6597.88	3268.09	1.0136	2.5021e-07	7.9835e-06	up	sp|Q9M0G2|C3H49_ARATH Zinc finger CCCH domain-containing protein 49 OS=Arabidopsis thaliana GN=At4g29190 PE=2 SV=1//5.48194e-104
Cla020913	2545.95	1479.25	0.78334	0.00024428	0.0034945	up	sp|D7SFH9|GPDL2_ARATH Glycerophosphodiester phosphodiesterase protein kinase domain-containing GDPDL2 OS=Arabidopsis thaliana GN=GDPDL2 PE=1 SV=1//1.67075e-54
Cla020924	880.972	456.792	0.94756	2.842e-05	0.00055804	up	sp|Q6YXX9|GG2_ORYSJ Guanine nucleotide-binding protein subunit gamma 2 OS=Oryza sativa subsp. japonica GN=RGG2 PE=1 SV=1//2.49616e-19
Cla020967	31.1364	1.9138	4.0241	9.8371e-05	0.0016098	up	sp|O48781|SPX2_ARATH SPX domain-containing protein 2 OS=Arabidopsis thaliana GN=SPX2 PE=2 SV=1//1.50377e-70
Cla020970	30260.3	14636.2	1.0479	7.0975e-08	2.509e-06	up	sp|Q9SKK0|EBF1_ARATH EIN3-binding F-box protein 1 OS=Arabidopsis thaliana GN=EBF1 PE=1 SV=1//0
Cla020976	1330.58	369.517	1.8483	4.2843e-13	3.5382e-11	up	sp|Q93WC4|IAA29_ARATH Auxin-responsive protein IAA29 OS=Arabidopsis thaliana GN=IAA29 PE=2 SV=2//5.11559e-13
Cla021039	12195.1	2630.25	2.213	7.2381e-26	3.0826e-23	up	sp|P52032|GPX1_ARATH Phospholipid hydroperoxide glutathione peroxidase 1, chloroplastic OS=Arabidopsis thaliana GN=GPX1 PE=2 SV=2//5.88017e-114
Cla021045	679.251	321.23	1.0803	1.6587e-05	0.0003498	up	-//-
Cla021047	5187.98	2119.48	1.2915	5.5068e-10	2.7824e-08	up	sp|O49931|TIC55_PEA Protein TIC 55, chloroplastic OS=Pisum sativum GN=TIC55 PE=1 SV=1//0
Cla021059	67.8857	3.37971	4.3281	1.425e-08	5.7394e-07	up	sp|O81037|BH070_ARATH Transcription factor bHLH70 OS=Arabidopsis thaliana GN=BHLH70 PE=2 SV=1//3.0469e-75
Cla021117	8523.82	5156.22	0.72518	0.0015215	0.01594	up	sp|Q9MAM1|CIPK9_ARATH CBL-interacting serine/threonine-protein kinase 9 OS=Arabidopsis thaliana GN=CIPK9 PE=1 SV=2//0
Cla021126	58.3411	19.1485	1.6073	0.0048731	0.039273	up	-//-
Cla021129	973.366	323.211	1.5905	5.7419e-11	3.4513e-09	up	-//-
Cla021131	147.372	35.2735	2.0628	6.498e-07	1.9006e-05	up	sp|P32980|ATPD_TOBAC ATP synthase delta chain, chloroplastic OS=Nicotiana tabacum GN=ATPD PE=2 SV=1//1.78254e-19
Cla021159	1102.35	525.204	1.0696	6.8713e-06	0.00016078	up	sp|Q5TKD8|TRL2_ORYSJ Thioredoxin-like 2, chloroplastic OS=Oryza sativa subsp. japonica GN=Os05g0200100 PE=2 SV=1//3.52425e-89
Cla021163	382.196	185.528	1.0427	0.00020363	0.0030115	up	sp|O65717|CNGC1_ARATH Cyclic nucleotide-gated ion channel 1 OS=Arabidopsis thaliana GN=CNGC1 PE=1 SV=1//9.25225e-161
Cla021169	3894.52	2410.51	0.69211	0.00060521	0.0073839	up	sp|Q9M158|STR4_ARATH Rhodanese-like domain-containing protein 4, chloroplastic OS=Arabidopsis thaliana GN=STR4 PE=1 SV=2//4.84012e-116
Cla021183	2345.54	506.179	2.2122	7.4389e-23	2.1823e-20	up	sp|O04616|CUT1A_ARATH Protein CURVATURE THYLAKOID 1A, chloroplastic OS=Arabidopsis thaliana GN=CURT1A PE=1 SV=1//3.88015e-61
Cla021214	3931.66	1678.76	1.2277	4.5343e-09	1.9923e-07	up	sp|P82192|RK5_SPIOL 50S ribosomal protein L5, chloroplastic OS=Spinacia oleracea GN=RPL5 PE=1 SV=2//1.01891e-122
Cla021217	10608.7	6651.55	0.67349	0.00079746	0.0092848	up	sp|Q9LMM6|BPS1_ARATH Protein BPS1, chloroplastic OS=Arabidopsis thaliana GN=BPS1 PE=2 SV=1//5.70665e-120
Cla021218	246.064	83.0976	1.5662	2.4803e-06	6.4741e-05	up	sp|A7PZL3|PGLR_VITVI Probable polygalacturonase OS=Vitis vinifera GN=GSVIVT00026920001 PE=1 SV=1//0
Cla021245	6176.12	3991.15	0.6299	0.0015519	0.01619	up	sp|Q9LD43|ACCA_ARATH Acetyl-coenzyme A carboxylase carboxyl transferase subunit alpha, chloroplastic OS=Arabidopsis thaliana GN=CAC3 PE=1 SV=1//1.80725e-22
Cla021250	11524.3	7772.17	0.56829	0.0051231	0.040817	up	sp|O65272|KEA2_ARATH K(+) efflux antiporter 2, chloroplastic OS=Arabidopsis thaliana GN=KEA2 PE=1 SV=2//0
Cla021264	1823.91	1064.06	0.77745	0.0018833	0.018871	up	sp|Q4V3D3|PUX9_ARATH Plant UBX domain-containing protein 9 OS=Arabidopsis thaliana GN=PUX9 PE=1 SV=1//1.3126e-59
Cla021268	5632.61	3303.58	0.76977	0.00014228	0.0022089	up	sp|O80845|PX11D_ARATH Peroxisomal membrane protein 11D OS=Arabidopsis thaliana GN=PEX11D PE=1 SV=2//1.11972e-145
Cla021320	847.826	464.215	0.86898	0.00021311	0.003133	up	sp|O22145|OSGP2_ARATH Probable tRNA N6-adenosine threonylcarbamoyltransferase, mitochondrial OS=Arabidopsis thaliana GN=GCP1 PE=2 SV=2//0
Cla021342	1181.07	684.243	0.78752	0.00068474	0.0081469	up	sp|Q8LPS6|PPR3_ARATH Pentatricopeptide repeat-containing protein At1g02150 OS=Arabidopsis thaliana GN=At1g02150 PE=2 SV=2//0
Cla021344	324.893	148.808	1.1265	0.00066312	0.0079522	up	sp|Q8VXX4|RFC3_ARATH Replication factor C subunit 3 OS=Arabidopsis thaliana GN=RFC3 PE=2 SV=1//1.37386e-41
Cla021358	1642.19	789.011	1.0575	1.8098e-06	4.8596e-05	up	sp|Q9M1C7|AB9C_ARATH ABC transporter C family member 9 OS=Arabidopsis thaliana GN=ABCC9 PE=2 SV=2//2.73754e-15
Cla021381	547.561	128.285	2.0937	2.7605e-13	2.359e-11	up	sp|Q9LTC0|Y5707_ARATH Probable receptor-like protein kinase At5g47070 OS=Arabidopsis thaliana GN=At5g47070 PE=1 SV=1//4.95615e-155
Cla021401	22847.5	6972.16	1.7124	3.048e-17	4.8806e-15	up	sp|Q9SDN0|DNJ20_ARATH Chaperone protein dnaJ 20, chloroplastic OS=Arabidopsis thaliana GN=ATJ20 PE=1 SV=2//3.00956e-55
Cla021402	3454.53	1319.63	1.3884	1.1975e-10	6.8224e-09	up	sp|Q9LU39|GLUBP_ARATH Glutamyl-tRNA reductase-binding protein, chloroplastic OS=Arabidopsis thaliana GN=GLUTRBP PE=1 SV=1//2.36128e-129
Cla021412	1310.39	807.661	0.69817	0.0024153	0.023056	up	sp|Q9D099|ACER3_MOUSE Alkaline ceramidase 3 OS=Mus musculus GN=Acer3 PE=2 SV=1//8.43826e-26
Cla021429	763.423	423.892	0.84879	0.00039547	0.0052379	up	-//-
Cla021445	189.349	49.925	1.9232	2.7101e-07	8.6054e-06	up	sp|Q944R1|PLY15_ARATH Probable pectate lyase 15 OS=Arabidopsis thaliana GN=At4g13710 PE=2 SV=1//0
Cla021451	245.022	61.39	1.9968	5.5462e-06	0.0001331	up	-//-
Cla021460	6073.27	3642.1	0.7377	0.00021972	0.0032037	up	-//-
Cla021482	346.232	142.324	1.2826	0.00063033	0.0076382	up	sp|P28644|ROC1_SPIOL 28 kDa ribonucleoprotein, chloroplastic OS=Spinacia oleracea PE=1 SV=1//3.63644e-14
Cla021500	1118.5	337.148	1.7301	3.477e-11	2.1764e-09	up	sp|P30956|RK28_TOBAC 50S ribosomal protein L28, chloroplastic OS=Nicotiana tabacum GN=RPL28 PE=1 SV=1//6.12652e-62
Cla021506	1978.84	1084.03	0.86826	4.6666e-05	0.00084849	up	sp|Q9LW57|PAP6_ARATH Probable plastid-lipid-associated protein 6, chloroplastic OS=Arabidopsis thaliana GN=PAP6 PE=1 SV=1//9.16315e-103
Cla021525	1270.62	383.801	1.7271	7.8451e-06	0.00018221	up	sp|Q8LDC8|ERF92_ARATH Ethylene-responsive transcription factor 1B OS=Arabidopsis thaliana GN=ERF1B PE=1 SV=2//6.59065e-53
Cla021535	68.2955	2.7531	4.6327	6.2999e-10	3.1428e-08	up	sp|Q84MB3|ACCH1_ARATH 1-aminocyclopropane-1-carboxylate oxidase homolog 1 OS=Arabidopsis thaliana GN=At1g06620 PE=2 SV=1//1.20747e-115
Cla021543	5070.37	2557.11	0.98758	2.0331e-06	5.4002e-05	up	sp|O23299|ECI2_ARATH Enoyl-CoA delta isomerase 2, peroxisomal OS=Arabidopsis thaliana GN=ECI2 PE=1 SV=1//3.5361e-89
Cla021570	596.664	138.401	2.1081	1.114e-09	5.3667e-08	up	sp|Q38832|IAA14_ARATH Auxin-responsive protein IAA14 OS=Arabidopsis thaliana GN=IAA14 PE=1 SV=2//1.94428e-95
Cla021575	1451.85	718.644	1.0145	5.9152e-06	0.0001409	up	sp|Q9FG89|PNSB5_ARATH Photosynthetic NDH subunit of subcomplex B 5, chloroplastic OS=Arabidopsis thaliana GN=PNSB5 PE=2 SV=1//8.05978e-94
Cla021626	429.428	141.655	1.6	2.4195e-08	9.3613e-07	up	sp|O23342|SECE1_ARATH Preprotein translocase subunit SECE1 OS=Arabidopsis thaliana GN=SECE1 PE=1 SV=1//1.75126e-20
Cla021628	554.891	150.941	1.8782	3.3696e-12	2.4992e-10	up	sp|P00252|FER1_DESMC Ferredoxin-1 OS=Desmonostoc muscorum PE=1 SV=2//7.9256e-23
Cla021634	1831.57	443.565	2.0459	4.0323e-05	0.00075052	up	sp|Q9S7X6|ACL5_ARATH Thermospermine synthase ACAULIS5 OS=Arabidopsis thaliana GN=ACL5 PE=1 SV=1//2.05704e-165
Cla021635	9443.18	834.682	3.5	2.7982e-19	5.9138e-17	up	sp|P32869|PSAD_CUCSA Photosystem I reaction center subunit II, chloroplastic OS=Cucumis sativus GN=psaD PE=1 SV=1//1.04519e-130
Cla021669	430.472	247.744	0.79707	0.0038045	0.032768	up	sp|Q9ZT66|E134_MAIZE Endo-1,3;1,4-beta-D-glucanase OS=Zea mays PE=1 SV=1//4.07672e-39
Cla021675	377.059	86.4601	2.1247	1.8668e-10	1.0336e-08	up	sp|P15102|GLNA4_PHAVU Glutamine synthetase leaf isozyme, chloroplastic OS=Phaseolus vulgaris PE=2 SV=1//0
Cla021702	2652.81	1751.7	0.59876	0.0055657	0.0436	up	sp|Q8VY21|TLP3_ARATH Tubby-like F-box protein 3 OS=Arabidopsis thaliana GN=TULP3 PE=1 SV=1//0
Cla021704	150.743	45.8118	1.7183	2.2885e-05	0.00046371	up	sp|J9RYI6|DCVR_CUCSA Divinyl chlorophyllide a 8-vinyl-reductase, chloroplastic OS=Cucumis sativus GN=DVR PE=1 SV=1//0
Cla021722	564.183	313.87	0.846	0.0010198	0.011325	up	-//-
Cla021731	1122.98	432.374	1.377	2.5729e-09	1.1733e-07	up	-//-
Cla021751	160.615	40.9006	1.9734	0.001442	0.015205	up	-//-
Cla021765	5075.13	2717.82	0.90099	1.7248e-05	0.00036027	up	sp|P42736|RAP23_ARATH Ethylene-responsive transcription factor RAP2-3 OS=Arabidopsis thaliana GN=RAP2-3 PE=1 SV=2//1.3862e-19
Cla021812	2015.4	663.878	1.6021	4.4655e-13	3.6419e-11	up	sp|P29344|RR1_SPIOL 30S ribosomal protein S1, chloroplastic OS=Spinacia oleracea GN=RPS1 PE=1 SV=1//0
Cla021844	1665.35	660.303	1.3346	1.497e-09	7.09e-08	up	sp|Q8GUG7|RH50_ARATH DEAD-box ATP-dependent RNA helicase 50 OS=Arabidopsis thaliana GN=RH50 PE=2 SV=2//0
Cla021845	612.036	144.141	2.0861	2.0975e-14	2.1251e-12	up	sp|Q9SX68|RK18_ARATH 50S ribosomal protein L18, chloroplastic OS=Arabidopsis thaliana GN=RPL18 PE=2 SV=1//1.14579e-41
Cla021853	133.086	9.778	3.7667	1.9203e-12	1.4629e-10	up	sp|Q941R6|MLP31_ARATH MLP-like protein 31 OS=Arabidopsis thaliana GN=MLP31 PE=2 SV=2//1.99478e-52
Cla021889	2315.84	1098.2	1.0764	3.3651e-07	1.0482e-05	up	sp|O49840|APK2B_ARATH Protein kinase 2B, chloroplastic OS=Arabidopsis thaliana GN=APK2B PE=2 SV=1//0
Cla021932	119786	28813	2.0557	1.54e-18	2.9387e-16	up	sp|P48352|CATA3_CUCPE Catalase isozyme 3 OS=Cucurbita pepo GN=CAT3 PE=2 SV=1//0
Cla021942	1911.62	1191.27	0.68229	0.0013383	0.014296	up	-//-
Cla021968	366.318	195.242	0.90784	0.0021773	0.021302	up	sp|Q9C595|YLMG2_ARATH YlmG homolog protein 2, chloroplastic OS=Arabidopsis thaliana GN=YLMG2 PE=2 SV=1//5.2562e-39
Cla021997	2565.59	1643.37	0.64263	0.0026443	0.024773	up	sp|Q3MG79|RSGA_ANAVT Putative ribosome biogenesis GTPase RsgA OS=Anabaena variabilis (strain ATCC 29413 / PCC 7937) GN=rsgA PE=3 SV=1//2.14063e-85
Cla022059	1026.72	669.784	0.61628	0.0061778	0.047358	up	sp|Q5XET6|PUS3_ARATH RNA pseudouridine synthase 3, mitochondrial OS=Arabidopsis thaliana GN=At1g78910 PE=2 SV=1//1.35961e-80
Cla022068	775.493	452.913	0.77588	0.0010381	0.011482	up	sp|B0S1F7|DNAJ_FINM2 Chaperone protein DnaJ OS=Finegoldia magna (strain ATCC 29328) GN=dnaJ PE=3 SV=1//7.48223e-08
Cla022101	197.674	96.3918	1.0361	0.002997	0.027284	up	sp|Q9M1S3|ARP1_ARATH Probable RNA-binding protein ARP1 OS=Arabidopsis thaliana GN=ARP1 PE=2 SV=1//1.15525e-31
Cla022102	271.771	114.679	1.2448	5.033e-05	0.00090117	up	sp|Q9ZPE7|EXO_ARATH Protein EXORDIUM OS=Arabidopsis thaliana GN=EXO PE=2 SV=1//6.20384e-108
Cla022162	622.513	151.716	2.0367	1.8446e-10	1.0242e-08	up	sp|Q9LTA2|AHL17_ARATH AT-hook motif nuclear-localized protein 17 OS=Arabidopsis thaliana GN=AHL17 PE=2 SV=1//7.14778e-60
Cla022165	5619.83	551.762	3.3484	0.0049335	0.039659	up	sp|Q766C3|NEP1_NEPGR Aspartic proteinase nepenthesin-1 OS=Nepenthes gracilis GN=nep1 PE=1 SV=1//4.49832e-45
Cla022168	101.512	20.6934	2.2944	3.3195e-06	8.4187e-05	up	sp|Q9FMP8|RGAP6_ARATH Rho GTPase-activating protein 6 OS=Arabidopsis thaliana GN=ROPGAP6 PE=2 SV=1//7.87814e-37
Cla022174	546.011	300.897	0.85966	0.00078619	0.0091871	up	sp|Q9SHZ8|PP168_ARATH Pentatricopeptide repeat-containing protein At2g22070 OS=Arabidopsis thaliana GN=PCMP-H41 PE=3 SV=1//8.3576e-23
Cla022179	58.305	16.9158	1.7852	0.0027128	0.025285	up	-//-
Cla022180	2145.27	1075.57	0.99605	6.4199e-06	0.00015166	up	sp|P93111|HEM11_CUCSA Glutamyl-tRNA reductase 1, chloroplastic OS=Cucumis sativus GN=HEMA1 PE=2 SV=1//0
Cla022188	1918.09	1257.18	0.60949	0.0044515	0.036855	up	sp|O24621|SIGC_ARATH RNA polymerase sigma factor sigC OS=Arabidopsis thaliana GN=SIGC PE=2 SV=1//6.8991e-134
Cla022207	730.087	368.781	0.9853	4.8207e-05	0.00087188	up	sp|Q9FN03|UVR8_ARATH Ultraviolet-B receptor UVR8 OS=Arabidopsis thaliana GN=UVR8 PE=1 SV=1//2.66719e-26
Cla022236	2368.3	1483.98	0.67438	0.00070572	0.0083559	up	-//-
Cla022252	6823.93	3289.39	1.0528	8.2846e-06	0.00019045	up	-//-
Cla022262	3880.12	2599.4	0.57792	0.0037335	0.032327	up	-//-
Cla022263	7728.82	2920.08	1.4042	6.4067e-12	4.5297e-10	up	sp|Q8RWG1|Y4139_ARATH Uncharacterized aarF domain-containing protein kinase At4g31390, chloroplastic OS=Arabidopsis thaliana GN=At4g31390 PE=2 SV=1//0
Cla022268	2399.68	1155.41	1.0544	7.6444e-07	2.2105e-05	up	sp|Q8L6Y3|PP396_ARATH Pentatricopeptide repeat-containing protein At5g24830 OS=Arabidopsis thaliana GN=At5g24830 PE=2 SV=1//7.75578e-164
Cla022273	3477.64	2228.04	0.64233	0.002878	0.026467	up	sp|Q9SCL7|NAGK_ARATH Acetylglutamate kinase, chloroplastic OS=Arabidopsis thaliana GN=NAGK PE=1 SV=1//6.11277e-148
Cla022278	584.762	262.261	1.1568	8.3656e-06	0.00019164	up	sp|P82715|PPD5_ARATH PsbP domain-containing protein 5, chloroplastic OS=Arabidopsis thaliana GN=PPD5 PE=1 SV=3//1.32144e-99
Cla022289	1406.84	749.436	0.90858	9.6939e-05	0.0015878	up	sp|Q9LFM5|YUC4_ARATH Probable indole-3-pyruvate monooxygenase YUCCA4 OS=Arabidopsis thaliana GN=YUC4 PE=1 SV=1//0
Cla022327	704.006	224.005	1.6521	9.0254e-11	5.2175e-09	up	sp|Q8GY91|APX6_ARATH Putative L-ascorbate peroxidase 6 OS=Arabidopsis thaliana GN=APX6 PE=2 SV=1//7.60497e-111
Cla022333	3776.55	1836.29	1.0403	3.9809e-07	1.215e-05	up	sp|P31853|ATPX_SPIOL ATP synthase subunit b&apos;, chloroplastic OS=Spinacia oleracea GN=ATPG PE=1 SV=2//8.42093e-66
Cla022350	5106.59	3160.12	0.69238	0.0010412	0.011497	up	sp|P46248|AAT5_ARATH Aspartate aminotransferase, chloroplastic OS=Arabidopsis thaliana GN=ASP5 PE=1 SV=2//0
Cla022364	122.622	45.3903	1.4338	0.00044952	0.0058282	up	sp|Q8H1D3|NPY1_ARATH BTB/POZ domain-containing protein NPY1 OS=Arabidopsis thaliana GN=NPY1 PE=2 SV=1//0
Cla022371	632.869	390.795	0.69549	0.0065149	0.049307	up	sp|P93115|MGDG_CUCSA Monogalactosyldiacylglycerol synthase, chloroplastic OS=Cucumis sativus PE=1 SV=1//0
Cla022444	238.353	120.744	0.98114	0.0020586	0.020312	up	sp|Q8S950|NACK1_TOBAC Kinesin-like protein NACK1 OS=Nicotiana tabacum GN=NACK1 PE=1 SV=1//1.21877e-45
Cla022457	3858.41	2286.15	0.75509	0.00022512	0.0032727	up	sp|Q9SDZ9|PPAF2_IPOBA Purple acid phosphatase 2 OS=Ipomoea batatas GN=PAP2 PE=1 SV=1//0
Cla022497	553.406	272.287	1.0232	4.1111e-05	0.00076374	up	-//-
Cla022498	4665.19	2866.79	0.7025	0.00029758	0.0041247	up	sp|Q8GUH2|Y1015_ARATH Uncharacterized protein At1g01500 OS=Arabidopsis thaliana GN=At1g01500 PE=2 SV=1//3.63535e-48
Cla022499	7202.27	4633.27	0.63642	0.0023076	0.022277	up	sp|P54243|G6PI_OENME Glucose-6-phosphate isomerase, cytosolic OS=Oenothera mexicana GN=PGIC PE=3 SV=1//0
Cla022533	35928.1	15917.8	1.1745	2.3306e-06	6.1322e-05	up	sp|O04348|TPP1_ARATH Thylakoidal processing peptidase 1, chloroplastic OS=Arabidopsis thaliana GN=TPP1 PE=2 SV=2//1.5011e-123
Cla022543	540.959	286.017	0.91942	0.00019401	0.0028932	up	sp|O48721|HEM4_ARATH Uroporphyrinogen-III synthase, chloroplastic OS=Arabidopsis thaliana GN=UROS PE=2 SV=2//2.97234e-111
Cla022558	147.97	2.03061	6.1872	4.5345e-15	5.1817e-13	up	sp|Q9FMZ0|BKI1_ARATH BRI1 kinase inhibitor 1 OS=Arabidopsis thaliana GN=BKI1 PE=1 SV=1//1.42138e-15
Cla022573	1603.66	516.823	1.6336	3.3664e-13	2.8398e-11	up	sp|P27521|CA4_ARATH Chlorophyll a-b binding protein 4, chloroplastic OS=Arabidopsis thaliana GN=LHCA4 PE=1 SV=1//1.03463e-49
Cla022575	4602.49	2817.01	0.70825	0.00055899	0.0069217	up	sp|Q9NBK5|TRC_DROME Serine/threonine-protein kinase tricorner OS=Drosophila melanogaster GN=trc PE=1 SV=1//1.26189e-142
Cla022601	6871.29	4210.01	0.70676	0.00043304	0.0056554	up	sp|Q9FDW1|MYB44_ARATH Transcription factor MYB44 OS=Arabidopsis thaliana GN=MYB44 PE=2 SV=1//4.28723e-77
Cla022604	317.416	60.7934	2.3844	4.4317e-07	1.3319e-05	up	sp|Q9M7N6|MAF1_SOLLC MFP1 attachment factor 1 OS=Solanum lycopersicum GN=MAF1 PE=1 SV=1//4.39451e-45
Cla022638	3248.99	2154.22	0.59282	0.0042001	0.035348	up	sp|Q9SY55|ECA3_ARATH Calcium-transporting ATPase 3, endoplasmic reticulum-type OS=Arabidopsis thaliana GN=ECA3 PE=2 SV=3//0
Cla022647	3245.9	1247.06	1.3801	8.3856e-10	4.1308e-08	up	-//-
Cla022653	19.5414	0.711784	4.7789	0.0011014	0.012033	up	sp|Q00257|1A12_CUCMA 1-aminocyclopropane-1-carboxylate synthase CMA101 OS=Cucurbita maxima GN=ACS2 PE=2 SV=1//0
Cla022654	6304.36	2539.47	1.3118	6.0761e-10	3.0388e-08	up	sp|F4IBD7|CSCLA_ARATH CSC1-like protein RXW8 OS=Arabidopsis thaliana GN=RXW8 PE=2 SV=1//0
Cla022677	41939.3	16554.2	1.3411	4.473e-11	2.7474e-09	up	sp|P49361|GCSPA_FLAPR Glycine dehydrogenase (decarboxylating) A, mitochondrial OS=Flaveria pringlei GN=GDCSPA PE=2 SV=1//0
Cla022679	2279.67	1062.62	1.1012	4.9815e-05	0.00089335	up	sp|Q9LRW1|LBD22_ARATH LOB domain-containing protein 22 OS=Arabidopsis thaliana GN=LBD22 PE=2 SV=1//2.86318e-26
Cla022693	33837.6	17375.4	0.96158	2.7731e-06	7.1434e-05	up	sp|P32061|STAD_CUCSA Acyl-[acyl-carrier-protein] desaturase, chloroplastic OS=Cucumis sativus PE=2 SV=1//0
Cla022694	2508.65	1103.16	1.1853	2.6574e-08	1.0162e-06	up	sp|Q9FN48|CAS_ARATH Calcium sensing receptor, chloroplastic OS=Arabidopsis thaliana GN=CAS PE=1 SV=1//1.08679e-10
Cla022716	2687.83	1123.53	1.2584	4.3504e-09	1.9258e-07	up	sp|Q8LDL0|HHL1_ARATH Protein HHL1, chloroplastic OS=Arabidopsis thaliana GN=HHL1 PE=1 SV=1//2.17369e-128
Cla022723	2905.09	661.922	2.1339	6.0479e-22	1.6284e-19	up	sp|P80470|PSBY_SPIOL Photosystem II core complex proteins psbY, chloroplastic OS=Spinacia oleracea GN=PSBY PE=1 SV=2//3.1351e-32
Cla022724	3176.1	1257.8	1.3363	4.5484e-10	2.3403e-08	up	sp|Q9FYL3|ALB31_ARATH ALBINO3-like protein 1, chloroplastic OS=Arabidopsis thaliana GN=ALB3L1 PE=2 SV=3//3.67163e-177
Cla022739	575.229	258.059	1.1564	1.1694e-05	0.00025567	up	-//-
Cla022781	195.779	38.2402	2.3561	2.1314e-09	9.8803e-08	up	sp|Q9LU68|CIA2_ARATH Protein CHLOROPLAST IMPORT APPARATUS 2 OS=Arabidopsis thaliana GN=CIA2 PE=2 SV=1//2.31665e-72
Cla022807	1736.08	588.972	1.5596	2.4045e-11	1.5444e-09	up	-//-
Cla022826	859.209	531.221	0.6937	0.003781	0.03261	up	-//-
Cla022875	36094.3	16751.6	1.1075	5.7066e-05	0.0010096	up	sp|Q0JC10|DCAM_ORYSJ S-adenosylmethionine decarboxylase proenzyme OS=Oryza sativa subsp. japonica GN=SAMDC PE=2 SV=1//2.147e-138
Cla022880	1529.24	734.904	1.0572	2.9533e-06	7.5582e-05	up	-//-
Cla022889	1108.11	437.072	1.3422	4.0227e-05	0.00074943	up	sp|P80680|FTRV_MAIZE Ferredoxin-thioredoxin reductase, variable chain OS=Zea mays PE=1 SV=1//2.96412e-26
Cla022915	20101.3	12347	0.70313	0.000824	0.0095213	up	sp|Q6YV23|CARA_ORYSJ Carbamoyl-phosphate synthase small chain, chloroplastic OS=Oryza sativa subsp. japonica GN=CARA PE=2 SV=2//0
Cla022935	3900.06	1430.01	1.4475	1.0848e-11	7.3268e-10	up	sp|Q8GSJ1|HIS1B_ARATH ATP phosphoribosyltransferase 2, chloroplastic OS=Arabidopsis thaliana GN=HISN1B PE=1 SV=1//4.38403e-11
Cla022950	28898.1	14532.2	0.99172	8.0534e-07	2.3142e-05	up	sp|P47999|CYSKP_ARATH Cysteine synthase, chloroplastic/chromoplastic OS=Arabidopsis thaliana GN=OASB PE=1 SV=2//0
Cla022960	2243.07	621.022	1.8528	1.8266e-16	2.5283e-14	up	-//-
Cla022962	627.855	261.298	1.2647	0.00062114	0.0075455	up	-//-
Cla022963	4162.47	251.454	4.0491	5.3229e-13	4.3209e-11	up	sp|P10708|CB12_SOLLC Chlorophyll a-b binding protein 7, chloroplastic OS=Solanum lycopersicum GN=CAB7 PE=3 SV=1//5.63658e-149
Cla022971	3612.29	2236.02	0.69198	0.00066574	0.0079739	up	sp|C7AE94|FAOMT_VITVI Flavonoid 3&apos;,5&apos;-methyltransferase OS=Vitis vinifera GN=FAOMT PE=1 SV=1//1.16055e-22
Cla022983	1360.1	805.117	0.75645	0.0034817	0.030613	up	sp|Q9C7G1|PUB45_ARATH U-box domain-containing protein 45 OS=Arabidopsis thaliana GN=PUB45 PE=1 SV=1//0
Cla022990	4321.05	2339.18	0.88538	9.4446e-06	0.00021313	up	sp|Q0WVW7|RQL5_ARATH ATP-dependent DNA helicase Q-like 5 OS=Arabidopsis thaliana GN=RECQL5 PE=2 SV=2//0
Cla023010	10767.9	7339.1	0.55306	0.003499	0.03068	up	sp|Q43125|CRY1_ARATH Cryptochrome-1 OS=Arabidopsis thaliana GN=CRY1 PE=1 SV=2//0
Cla023014	14105.4	6995.16	1.0118	3.9378e-07	1.2037e-05	up	sp|P45969|SDS22_CAEEL Protein phosphatase 1 regulatory subunit SDS22 homolog OS=Caenorhabditis elegans GN=sds-22 PE=3 SV=1//1.99669e-14
Cla023018	325.727	110.532	1.5592	0.0044166	0.036635	up	sp|F8WKW1|UGT2_GARJA 7-deoxyloganetin glucosyltransferase OS=Gardenia jasminoides GN=UGT85A24 PE=1 SV=1//0
Cla023026	466.026	260.995	0.83639	0.0014134	0.01496	up	sp|Q9THX6|TL29_SOLLC Thylakoid lumenal 29 kDa protein, chloroplastic OS=Solanum lycopersicum GN=CLEB3J9 PE=3 SV=1//7.76894e-161
Cla023036	1940.67	820.12	1.2427	1.8307e-08	7.211e-07	up	sp|Q39061|CP33_ARATH RNA-binding protein CP33, chloroplastic OS=Arabidopsis thaliana GN=CP33 PE=2 SV=1//1.95627e-23
Cla023084	49800.2	24652.1	1.0144	2.0254e-07	6.6212e-06	up	sp|P42066|PCKA_CUCSA Phosphoenolpyruvate carboxykinase [ATP] OS=Cucumis sativus GN=PCK PE=2 SV=1//0
Cla023094	1645.87	816.833	1.0107	0.00023865	0.0034294	up	-//-
Cla023096	699.001	425.927	0.71469	0.0018644	0.018735	up	sp|D7STK2|GATC_VITVI Glutamyl-tRNA(Gln) amidotransferase subunit C, chloroplastic/mitochondrial OS=Vitis vinifera GN=GATC PE=3 SV=1//5.04532e-57
Cla023102	1465.77	825.229	0.8288	0.00013578	0.0021249	up	sp|Q8LAL2|IAA26_ARATH Auxin-responsive protein IAA26 OS=Arabidopsis thaliana GN=IAA26 PE=1 SV=2//1.95219e-46
Cla023103	1035.31	490.927	1.0765	5.5648e-06	0.00013339	up	sp|Q8RXE9|SYWM_ARATH Tryptophan--tRNA ligase, chloroplastic/mitochondrial OS=Arabidopsis thaliana GN=OVA4 PE=2 SV=1//2.92267e-98
Cla023165	1625.61	1039.79	0.64468	0.0038351	0.032945	up	sp|Q9CAQ2|Y1754_ARATH Acetyltransferase At1g77540 OS=Arabidopsis thaliana GN=At1g77540 PE=1 SV=2//2.47977e-32
Cla023178	1376.12	424.818	1.6957	2.8821e-12	2.1457e-10	up	sp|Q80Y75|DJB13_MOUSE DnaJ homolog subfamily B member 13 OS=Mus musculus GN=Dnajb13 PE=2 SV=1//2.20146e-41
Cla023179	214.964	114.792	0.90508	0.0062291	0.047662	up	sp|Q0IU52|ASP1_ORYSJ Aspartic proteinase Asp1 OS=Oryza sativa subsp. japonica GN=ASP1 PE=2 SV=1//5.19846e-73
Cla023180	2300.47	1121.59	1.0364	2.8047e-06	7.2155e-05	up	sp|Q0IU52|ASP1_ORYSJ Aspartic proteinase Asp1 OS=Oryza sativa subsp. japonica GN=ASP1 PE=2 SV=1//2.45803e-90
Cla023201	4678.99	2982.27	0.64979	0.0017729	0.018022	up	sp|Q8LPJ4|AB2E_ARATH ABC transporter E family member 2 OS=Arabidopsis thaliana GN=ABCE2 PE=2 SV=1//0
Cla023215	3116.19	2118.21	0.55694	0.0065133	0.049307	up	sp|Q9SHI1|IF2C_ARATH Translation initiation factor IF-2, chloroplastic OS=Arabidopsis thaliana GN=At1g17220 PE=2 SV=2//0
Cla023223	978.203	589.839	0.72981	0.0010221	0.011343	up	sp|A3KPF8|PP131_ARATH Pentatricopeptide repeat-containing protein At1g79080, chloroplastic OS=Arabidopsis thaliana GN=At1g79080 PE=2 SV=1//0
Cla023225	1885.79	1149.21	0.71452	0.00070955	0.0083812	up	sp|P93820|Y1439_ARATH BTB/POZ domain-containing protein At1g04390 OS=Arabidopsis thaliana GN=At1g04390 PE=2 SV=3//0
Cla023246	7940.38	4056.67	0.96891	0.00023477	0.0033905	up	sp|Q94A68|Y1669_ARATH Uncharacterized oxidoreductase At1g06690, chloroplastic OS=Arabidopsis thaliana GN=At1g06690 PE=2 SV=1//0
Cla023250	621.278	337.603	0.87991	0.00045322	0.0058606	up	sp|Q9LYT2|PP287_ARATH Pentatricopeptide repeat-containing protein At3g59040 OS=Arabidopsis thaliana GN=At3g59040 PE=2 SV=2//0
Cla023255	893.204	543.149	0.71764	0.0019785	0.01962	up	sp|Q2HIW2|MAPR4_ARATH Membrane-associated progesterone-binding protein 4 OS=Arabidopsis thaliana GN=MAPR4 PE=2 SV=1//3.10322e-66
Cla023263	44.8218	8.66435	2.371	0.0010672	0.011756	up	sp|Q9LHJ2|U82A1_ARATH UDP-glycosyltransferase 82A1 OS=Arabidopsis thaliana GN=UGT82A1 PE=2 SV=1//5.62494e-143
Cla023270	2990.94	859.643	1.7988	3.7432e-13	3.1308e-11	up	sp|Q66PF3|UFOG3_FRAAN Putative UDP-glucose flavonoid 3-O-glucosyltransferase 3 OS=Fragaria ananassa GN=GT3 PE=2 SV=1//1.61369e-138
Cla023276	713.38	431.574	0.72506	0.002223	0.021598	up	sp|Q66PF3|UFOG3_FRAAN Putative UDP-glucose flavonoid 3-O-glucosyltransferase 3 OS=Fragaria ananassa GN=GT3 PE=2 SV=1//1.32677e-149
Cla023282	1663.62	471.387	1.8193	0.00023216	0.0033602	up	sp|Q00451|PRF1_SOLLC 36.4 kDa proline-rich protein OS=Solanum lycopersicum GN=TPRP-F1 PE=2 SV=1//4.72579e-22
Cla023295	193.094	91.4047	1.079	0.0023338	0.022419	up	sp|Q9C8L2|FAP3_ARATH Fatty-acid-binding protein 3 OS=Arabidopsis thaliana GN=FAP3 PE=1 SV=1//2.67706e-77
Cla023299	1973.34	1116.56	0.82158	0.00043635	0.0056911	up	sp|Q0DC89|MSRB1_ORYSJ Peptide methionine sulfoxide reductase B1, chloroplastic OS=Oryza sativa subsp. japonica GN=MSRB1 PE=2 SV=2//7.29212e-84
Cla023307	1687.38	396.635	2.0889	9.6834e-20	2.1385e-17	up	sp|Q9SYL9|RK13_ARATH 50S ribosomal protein L13, chloroplastic OS=Arabidopsis thaliana GN=RPL13 PE=2 SV=1//7.99362e-89
Cla023330	341.141	198.727	0.77958	0.0059398	0.046035	up	-//-
Cla023344	12926.2	6297.98	1.0373	0.0017066	0.017516	up	-//-
Cla023346	1029.45	448.957	1.1972	2.5685e-07	8.1823e-06	up	sp|Q9LFN5|GLR25_ARATH Glutamate receptor 2.5 OS=Arabidopsis thaliana GN=GLR2.5 PE=2 SV=2//1.50117e-121
Cla023360	1887.31	486.024	1.9572	7.0194e-18	1.1997e-15	up	sp|Q9ASV6|RR20_ARATH 30S ribosomal protein S20, chloroplastic OS=Arabidopsis thaliana GN=RPS20 PE=2 SV=1//1.43259e-37
Cla023370	5627.94	3009.3	0.90318	4.2971e-06	0.00010637	up	sp|P0C7P8|LHWL1_ARATH Transcription factor EMB1444 OS=Arabidopsis thaliana GN=EMB1444 PE=2 SV=1//1.85799e-16
Cla023395	2564.04	789.214	1.6999	8.5355e-15	9.1675e-13	up	sp|Q9FN03|UVR8_ARATH Ultraviolet-B receptor UVR8 OS=Arabidopsis thaliana GN=UVR8 PE=1 SV=1//9.71157e-22
Cla023399	3813.64	585.356	2.7038	2.599e-30	1.419e-27	up	sp|Q41249|PORA_CUCSA Protochlorophyllide reductase, chloroplastic OS=Cucumis sativus GN=PORA PE=2 SV=1//0
Cla023403	3359.94	676.81	2.3116	1.9112e-19	4.0831e-17	up	-//-
Cla023407	663.821	219.58	1.596	0.00021427	0.0031413	up	sp|Q93VY3|NAC72_ARATH NAC domain-containing protein 72 OS=Arabidopsis thaliana GN=NAC072 PE=2 SV=1//4.6594e-119
Cla023424	5897.09	2726.62	1.1129	1.1318e-07	3.9027e-06	up	sp|Q54WM0|T1843_DICDI Transmembrane protein 184 homolog DDB_G0279555 OS=Dictyostelium discoideum GN=tmem184C PE=3 SV=1//2.97544e-18
Cla023441	6626.28	2854.06	1.2152	6.1932e-09	2.6405e-07	up	sp|F4HUK6|AAE1_ARATH Probable acyl-activating enzyme 1, peroxisomal OS=Arabidopsis thaliana GN=AAE1 PE=2 SV=1//0
Cla023445	7985.4	3326.27	1.2635	4.204e-08	1.565e-06	up	sp|Q8LEV3|Y2060_ARATH BTB/POZ domain-containing protein At2g30600 OS=Arabidopsis thaliana GN=At2g30600/At2g30610 PE=2 SV=1//0
Cla023452	2320.66	1236.4	0.90839	2.1465e-05	0.00043721	up	-//-
Cla023454	14813	8937.83	0.72887	0.00020533	0.0030322	up	sp|P26585|HMGL_SOYBN HMG1/2-like protein OS=Glycine max PE=2 SV=1//4.90575e-33
Cla023464	1772.87	526.328	1.7521	1.1753e-09	5.6206e-08	up	sp|P12859|G3PB_PEA Glyceraldehyde-3-phosphate dehydrogenase B, chloroplastic OS=Pisum sativum GN=GAPB PE=2 SV=2//0
Cla023466	932.575	455.812	1.0328	9.8385e-06	0.00022061	up	sp|Q9LM71|FKB18_ARATH Peptidyl-prolyl cis-trans isomerase FKBP18, chloroplastic OS=Arabidopsis thaliana GN=FKBP18 PE=1 SV=2//1.51058e-89
Novel00069	127.607	38.1038	1.7437	4.8193e-05	0.00087188	up	-//-
Novel00073	40.2909	0	Inf	6.6239e-09	2.8119e-07	up	14 kDa proline-rich protein DC2.15, putative [Theobroma cacao]>gi|508777131|gb|EOY24387.1| 14 kDa proline-rich protein DC2.15, putative [Theobroma cacao]
Novel00081	440.92	177.727	1.3109	0.00055124	0.006866	up	-//-
Novel00082	418014	46936.8	3.1548	3.4971e-10	1.8577e-08	up	defensin-like protein 6 [Citrullus lanatus]
Novel00108	346.176	100.874	1.779	7.4082e-09	3.1113e-07	up	hypothetical protein PRUPE_ppa016013mg, partial [Prunus persica]>gi|462395598|gb|EMJ01397.1| hypothetical protein PRUPE_ppa016013mg, partial [Prunus persica]
Novel00119	1414.55	939.476	0.59042	0.0044299	0.036707	up	-//-
Novel00139	98.1364	37.1233	1.4025	0.0064448	0.048927	up	PREDICTED: geraniol 8-hydroxylase-like [Cucumis sativus]
Novel00140	33.1184	2.32206	3.8342	8.7666e-05	0.0014594	up	-//-
Novel00146	735.014	347.661	1.0801	1.3933e-05	0.00029766	up	-//-
Novel00147	972.829	620.183	0.64949	0.0040396	0.034277	up	hypothetical protein VITISV_024648 [Vitis vinifera]
Novel00164	367.413	70.0699	2.3905	1.0562e-12	8.337e-11	up	-//-
Novel00204	4043.33	515.057	2.9727	3.9206e-36	3.3504e-33	up	PREDICTED: general transcription factor IIH subunit 5 [Cucumis melo]>gi|659096085|ref|XP_008448919.1| PREDICTED: general transcription factor IIH subunit 5 [Cucumis melo]
Novel00238	1710.21	505.463	1.7585	1.7283e-10	9.6781e-09	up	PREDICTED: low temperature-induced protein lt101.2-like [Cucumis melo]
Novel00239	549.394	229.752	1.2578	2.8272e-06	7.2638e-05	up	PREDICTED: uncharacterized protein LOC101211971 [Cucumis sativus]>gi|700203792|gb|KGN58925.1| hypothetical protein Csa_3G736730 [Cucumis sativus]
Novel00248	1140.61	228.132	2.3219	7.9802e-07	2.2965e-05	up	-//-
Novel00269	74.5432	23.2777	1.6791	0.0018534	0.018643	up	PREDICTED: serine/threonine-protein phosphatase 7 long form homolog [Cucumis melo]
Novel00273	3476.04	2076.96	0.74297	0.0013361	0.01428	up	hypothetical protein VITISV_031315 [Vitis vinifera]
Novel00279	2714.81	1807.07	0.5872	0.0048396	0.039097	up	hypothetical protein Csa_3G842050 [Cucumis sativus]
Novel00285	2168.12	221.395	3.2917	6.1484e-43	9.296e-40	up	PREDICTED: secoisolariciresinol dehydrogenase-like [Cucumis sativus]>gi|700204039|gb|KGN59172.1| hypothetical protein Csa_3G778280 [Cucumis sativus]
Novel00317	1507.91	623.998	1.2729	4.3864e-08	1.6267e-06	up	PREDICTED: monothiol glutaredoxin-S7, chloroplastic [Cucumis sativus]>gi|700206127|gb|KGN61246.1| hypothetical protein Csa_2G074080 [Cucumis sativus]
Novel00327	10012.8	5864.38	0.7718	0.00012802	0.0020179	up	PREDICTED: putative caffeoyl-CoA O-methyltransferase At1g67980 [Cucumis melo]
Novel00331	5282.54	2814.42	0.90839	0.0014436	0.015206	up	PREDICTED: uncharacterized protein At5g65660-like isoform X2 [Cucumis sativus]
Novel00352	387.785	65.7287	2.5607	1.7265e-16	2.4239e-14	up	PREDICTED: zinc finger Ran-binding domain-containing protein 2 [Cucumis melo]>gi|659071024|ref|XP_008457794.1| PREDICTED: zinc finger Ran-binding domain-containing protein 2 [Cucumis melo]
Novel00384	949.832	537.174	0.82228	0.00053559	0.0067009	up	PREDICTED: chloroplast envelope membrane protein [Cucumis melo]>gi|659069512|ref|XP_008450436.1| PREDICTED: chloroplast envelope membrane protein [Cucumis melo]>gi|659069514|ref|XP_008450445.1| PREDICTED: chloroplast envelope membrane protein [Cucumis melo]>gi|659069516|ref|XP_008450451.1| PREDICTED: chloroplast envelope membrane protein [Cucumis melo]
Novel00388	4735.32	1786.3	1.4065	1.1271e-08	4.6541e-07	up	PREDICTED: homogentisate phytyltransferase 1, chloroplastic [Cucumis sativus]>gi|700206033|gb|KGN61152.1| hypothetical protein Csa_2G059830 [Cucumis sativus]
Novel00389	103.371	14.2857	2.8552	5.2792e-08	1.9109e-06	up	hypothetical protein VITISV_037520 [Vitis vinifera]
Novel00402	1507.64	949.797	0.6666	0.0027163	0.025291	up	hypothetical protein B456_002G129000 [Gossypium raimondii]
Novel00414	6937.2	2698.43	1.3622	7.9158e-11	4.6443e-09	up	-//-
Novel00417	128.297	9.56715	3.7453	2.7442e-12	2.0587e-10	up	-//-
Novel00419	109815	49162.8	1.1594	0.0062735	0.047961	up	BURP domain-containing protein 17 [Citrullus lanatus]
Novel00437	69.9558	0	Inf	1.4617e-14	1.5121e-12	up	hypothetical protein VITISV_013246 [Vitis vinifera]
Novel00445	356.577	175.468	1.023	0.00059354	0.007273	up	PREDICTED: probable disease resistance protein At4g27220, partial [Cucumis melo]
Novel00451	1511.14	628.788	1.265	2.6254e-06	6.7986e-05	up	PREDICTED: uncharacterized protein LOC101205908 [Cucumis sativus]>gi|700191928|gb|KGN47132.1| hypothetical protein Csa_6G190230 [Cucumis sativus]
Novel00480	46.2269	11.7043	1.9817	0.0033954	0.030008	up	-//-
Novel00542	38.6714	1.86211	4.3763	1.3097e-05	0.00028257	up	-//-
Novel00543	465.785	38.303	3.6041	4.2264e-16	5.651e-14	up	ADP ribosylation factor 002 [Jatropha curcas]
Novel00556	24.9875	0	Inf	7.8316e-05	0.0013236	up	PREDICTED: LOW QUALITY PROTEIN: F-box/FBD/LRR-repeat protein At1g16930-like [Tarenaya hassleriana]
Novel00575	272.203	126.124	1.1098	0.0005959	0.007293	up	hypothetical protein Csa_1G385040 [Cucumis sativus]
Novel00598	99.486	19.784	2.3302	8.036e-06	0.00018574	up	PREDICTED: transposon Tf2-1 polyprotein isoform X1 [Beta vulgaris subsp. vulgaris]
Novel00609	13849.9	4349.33	1.671	8.212e-14	7.404e-12	up	hypothetical protein Csa_1G614640 [Cucumis sativus]
Novel00624	1412.13	99.3787	3.8288	7.4677e-05	0.0012719	up	PREDICTED: histidine-containing phosphotransfer protein 1-like [Cucumis melo]
Novel00664	147.105	48.5562	1.5991	3.6956e-05	0.00070045	up	-//-
Novel00705	139.046	44.7635	1.6352	4.8218e-05	0.00087188	up	-//-
Novel00709	241.254	0	Inf	1.4894e-14	1.5327e-12	up	SKU5 similar 5 isoform 2 [Theobroma cacao]>gi|508710319|gb|EOY02216.1| SKU5 similar 5 isoform 2 [Theobroma cacao]
Novel00714	73.6021	0	Inf	3.0567e-15	3.5976e-13	up	-//-
Novel00732	391.68	44.1421	3.1494	1.2337e-20	2.9572e-18	up	hypothetical protein Csa_4G303090 [Cucumis sativus]
Novel00739	395.443	142.829	1.4692	5.2104e-06	0.00012643	up	hypothetical protein Csa_3G118200 [Cucumis sativus]
Novel00744	10829.1	4047.92	1.4197	1.561e-12	1.1985e-10	up	PREDICTED: uncharacterized protein At3g61260 [Cucumis melo]
Novel00764	173.147	63.909	1.4379	0.0011822	0.012809	up	-//-
Novel00782	28.9249	1.78628	4.0173	0.0041065	0.034715	up	PREDICTED: uncharacterized protein LOC103496664 [Cucumis melo]
Novel00856	355.316	168.171	1.0792	0.00019157	0.0028641	up	-//-
Novel00870	920.661	351.15	1.3906	1.3784e-08	5.5744e-07	up	hypothetical protein VITISV_017108 [Vitis vinifera]
Novel00876	53887	24691.4	1.1259	1.2099e-05	0.00026364	up	PREDICTED: CBL-interacting serine/threonine-protein kinase 1-like [Cucumis melo]
Novel00879	42.8911	6.97825	2.6197	0.00053256	0.0066714	up	-//-
Novel00888	207.045	9.76026	4.4069	1.9156e-10	1.0576e-08	up	hypothetical protein VITISV_017741 [Vitis vinifera]
Novel00889	165.283	12.4764	3.7277	4.1338e-12	2.9762e-10	up	-//-
Novel00893	107.909	0	Inf	2.7981e-21	7.1423e-19	up	-//-
Novel00894	69.3098	0	Inf	1.919e-14	1.9644e-12	up	PREDICTED: LOW QUALITY PROTEIN: uncharacterized protein LOC104585652 [Nelumbo nucifera]
Novel00917	2314.55	813.799	1.508	4.6079e-09	2.0126e-07	up	PREDICTED: cytochrome P450 71A22-like [Cucumis sativus]
Novel00921	754.605	484.288	0.63986	0.006422	0.048811	up	PREDICTED: glutaredoxin-C5, chloroplastic-like [Cucumis sativus]>gi|700191154|gb|KGN46358.1| hypothetical protein Csa_6G087860 [Cucumis sativus]
Novel00923	43.4413	6.28604	2.7888	0.0004932	0.0062866	up	hypothetical protein VITISV_017108 [Vitis vinifera]
Novel00931	563.903	190.434	1.5662	4.0127e-09	1.7884e-07	up	-//-
Novel00962	724.192	332.673	1.1223	8.7276e-06	0.00019854	up	hypothetical protein Csa_6G187950 [Cucumis sativus]
Novel00967	1161.91	613.709	0.92087	3.4834e-05	0.00066601	up	ATP-dependent clp protease [Cucumis melo subsp. melo]
Novel00973	98.566	2.04131	5.5935	1.5629e-07	5.2511e-06	up	PREDICTED: uncharacterized protein LOC102626150 [Citrus sinensis]
Novel00979	58.9165	8.16956	2.8503	2.5149e-05	0.00050184	up	PREDICTED: uncharacterized protein LOC103503225 [Cucumis melo]
Novel00987	49.8449	3.28568	3.9232	0.0012888	0.013843	up	-//-
Novel01038	571.875	266.917	1.0993	3.3901e-05	0.0006507	up	PREDICTED: uncharacterized protein LOC101202761 [Cucumis sativus]>gi|700192704|gb|KGN47908.1| hypothetical protein Csa_6G410630 [Cucumis sativus]
Novel01050	6398.86	3034.05	1.0766	4.2279e-05	0.00078248	up	-//-
Novel01051	17.2939	0	Inf	0.00030195	0.0041765	up	-//-
Novel01052	210.747	8.75246	4.5897	2.4374e-23	7.4853e-21	up	Retrovirus-related Pol polyprotein from transposon TNT 1-94, partial [Glycine soja]
Novel01054	415.031	134.625	1.6243	9.1375e-06	0.00020715	up	-//-
Novel01060	25.991	3.82759	2.7635	0.0046231	0.037925	up	-//-
Novel01097	3114.55	1607.69	0.95403	0.0030819	0.027874	up	-//-
Novel01125	393.457	206.03	0.93335	0.00073552	0.0086704	up	hypothetical protein BVRB_6g153840 [Beta vulgaris subsp. vulgaris]
Novel01138	100.815	42.2793	1.2537	0.0029677	0.027081	up	PREDICTED: uncharacterized protein LOC101220853 [Cucumis sativus]>gi|700207659|gb|KGN62778.1| hypothetical protein Csa_2G372740 [Cucumis sativus]
Novel01153	652.437	220.732	1.5635	4.882e-10	2.4989e-08	up	-//-
Novel01158	33.3256	4.47562	2.8965	0.0037928	0.032696	up	-//-
Novel01172	7937.36	4167.76	0.92939	7.0566e-06	0.00016492	up	hypothetical protein MTR_5g051130 [Medicago truncatula]
Novel01182	49.5503	4.43758	3.4811	3.8997e-05	0.00073142	up	-//-
Novel01204	72.6235	11.5693	2.6501	0.0010995	0.01202	up	-//-
Novel01231	715.282	66.9663	3.417	1.6209e-31	1.0277e-28	up	hypothetical protein Csa_3G914570 [Cucumis sativus]
Novel01234	296.292	10.2956	4.8469	1.6108e-07	5.3843e-06	up	hypothetical protein Csa_3G914570 [Cucumis sativus]
Novel01239	57.8457	12.877	2.1674	0.0014855	0.015605	up	PREDICTED: uncharacterized protein LOC103497996 isoform X1 [Cucumis melo]
Novel01248	980.863	62.7725	3.9658	1.8646e-23	5.8174e-21	up	hypothetical protein Csa_1G434190 [Cucumis sativus]
Novel01253	1102.15	178.906	2.623	2.8448e-08	1.0794e-06	up	-//-
Novel01261	244.2	126.787	0.94566	0.0021237	0.020862	up	-//-
Novel01281	355.797	188.872	0.91364	0.00095251	0.010741	up	hypothetical protein Csa_7G239580 [Cucumis sativus]
Novel01287	180.754	92.0815	0.97304	0.0043408	0.036163	up	-//-
Novel01308	2563.43	1433.64	0.83839	0.0022272	0.021629	up	putative gag-pol polyprotein [Citrus sinensis]
Novel01351	5778.26	3605.94	0.68026	0.0013753	0.014628	up	PREDICTED: transcription factor bHLH114-like isoform X2 [Cucumis melo]
Cla000040	536.421	1373.61	-1.3565	2.5646e-09	1.1722e-07	down	sp|P19037|HS181_ARATH 18.1 kDa class I heat shock protein OS=Arabidopsis thaliana GN=HSP18.1 PE=2 SV=1//2.28337e-71
Cla000163	210.847	465.902	-1.1438	0.00065549	0.0078944	down	sp|Q8LDR3|CYP23_ARATH Peptidyl-prolyl cis-trans isomerase CYP23 OS=Arabidopsis thaliana GN=CYP23 PE=2 SV=1//4.85414e-59
Cla000200	34.7236	87.1706	-1.3279	0.0051089	0.040736	down	sp|Q9FNN7|PP371_ARATH Pentatricopeptide repeat-containing protein At5g08510 OS=Arabidopsis thaliana GN=PCMP-E20 PE=2 SV=1//0
Cla000384	1634.53	3018.04	-0.88474	0.00043974	0.0057315	down	sp|Q9LMX8|6PGL1_ARATH Probable 6-phosphogluconolactonase 1 OS=Arabidopsis thaliana GN=At1g13700 PE=2 SV=1//5.52989e-122
Cla000388	97.8978	197.393	-1.0117	0.0029556	0.027045	down	sp|Q9LMX5|AFP2_ARATH Ninja-family protein AFP2 OS=Arabidopsis thaliana GN=AFP2 PE=1 SV=1//2.49044e-28
Cla000443	154.431	645.954	-2.0645	2.7935e-14	2.7591e-12	down	sp|Q9M2C0|VITH4_ARATH Vacuolar iron transporter homolog 4 OS=Arabidopsis thaliana GN=At3g43660 PE=2 SV=1//7.96973e-75
Cla000456	212.517	371.222	-0.80471	0.0031892	0.028584	down	sp|Q8L518|CK2_ARATH Probable choline kinase 2 OS=Arabidopsis thaliana GN=At1g74320 PE=2 SV=1//1.33388e-172
Cla000472	1229.13	3265.27	-1.4096	0.0037512	0.032437	down	sp|Q52K88|NUD13_ARATH Nudix hydrolase 13, mitochondrial OS=Arabidopsis thaliana GN=NUDT13 PE=1 SV=1//6.58569e-72
Cla000547	178.365	462.983	-1.3761	0.0025634	0.024177	down	sp|Q9SKC4|ARI10_ARATH Probable E3 ubiquitin-protein ligase ARI10 OS=Arabidopsis thaliana GN=ARI10 PE=2 SV=1//2.86217e-12
Cla000601	4.05281	37.629	-3.2149	0.0033854	0.029932	down	-//-
Cla000629	314.911	522.928	-0.73167	0.0043143	0.036038	down	sp|Q9SXY0|FAS1_ARATH Chromatin assembly factor 1 subunit FAS1 OS=Arabidopsis thaliana GN=FAS1 PE=1 SV=1//0
Cla000712	3515.93	5246.8	-0.57753	0.0051352	0.04088	down	-//-
Cla000713	2348.58	4921.1	-1.0672	1.7698e-07	5.8462e-06	down	sp|P22335|HSF24_SOLPE Heat shock factor protein HSF24 OS=Solanum peruvianum GN=HSF24 PE=2 SV=1//3.69713e-98
Cla000743	0.945233	27.4892	-4.8621	6.3112e-05	0.0011035	down	sp|O48533|PYM_ARATH Protein POLYCHOME OS=Arabidopsis thaliana GN=PYM PE=1 SV=1//3.6726e-54
Cla000764	8.24858	40.5636	-2.298	0.00222	0.02158	down	sp|Q9SH58|MAKR2_ARATH Probable membrane-associated kinase regulator 2 OS=Arabidopsis thaliana GN=MAKR2 PE=2 SV=1//2.46866e-48
Cla000777	151.127	795.737	-2.3965	0.0052614	0.041699	down	sp|Q8RXU4|THA1_ARATH Probable low-specificity L-threonine aldolase 1 OS=Arabidopsis thaliana GN=THA1 PE=1 SV=1//1.88009e-13
Cla000778	287.909	1365.22	-2.2455	0.0031295	0.028189	down	sp|Q8RXU4|THA1_ARATH Probable low-specificity L-threonine aldolase 1 OS=Arabidopsis thaliana GN=THA1 PE=1 SV=1//6.83508e-80
Cla000788	291.725	518.083	-0.82858	0.0013868	0.014718	down	sp|O23277|PRD1_ARATH Protein PRD1 OS=Arabidopsis thaliana GN=PRD1 PE=1 SV=3//0
Cla000796	260.1	671.937	-1.3693	8.077e-08	2.8298e-06	down	sp|P92990|JP650_ARATH Probable polygalacturonase non-catalytic subunit JP650 OS=Arabidopsis thaliana GN=JP650 PE=2 SV=2//0
Cla000861	826.87	1481.04	-0.84088	0.0047559	0.038659	down	sp|Q0P5L0|RBM42_BOVIN RNA-binding protein 42 OS=Bos taurus GN=RBM42 PE=2 SV=1//1.19185e-49
Cla000900	327.798	595.212	-0.8606	0.00052238	0.0065872	down	sp|Q9LNP9|P2C07_ARATH Protein phosphatase 2C 7 OS=Arabidopsis thaliana GN=HAB2 PE=1 SV=2//1.65355e-28
Cla000910	1014	1574.47	-0.6348	0.0032833	0.029245	down	sp|Q9LI74|CHUP1_ARATH Protein CHUP1, chloroplastic OS=Arabidopsis thaliana GN=CHUP1 PE=1 SV=1//2.1091e-47
Cla000964	0.631795	513.292	-9.6661	5.1628e-70	2.0295e-66	down	sp|Q96557|SPD2_DATST Spermidine synthase 2 OS=Datura stramonium PE=2 SV=1//2.2659e-127
Cla001099	1198.71	2284.62	-0.93047	0.0005579	0.0069183	down	sp|Q9SZC9|HMA6_ARATH Copper-transporting ATPase PAA1, chloroplastic OS=Arabidopsis thaliana GN=PAA1 PE=2 SV=1//0
Cla001149	148.485	275.386	-0.89114	0.0037797	0.03261	down	sp|P93733|PLDB1_ARATH Phospholipase D beta 1 OS=Arabidopsis thaliana GN=PLDBETA1 PE=2 SV=4//0
Cla001242	559.331	901.227	-0.68819	0.0025464	0.024039	down	sp|A6NDV4|TMM8B_HUMAN Transmembrane protein 8B OS=Homo sapiens GN=TMEM8B PE=1 SV=2//3.18761e-10
Cla001251	3040.96	4713.63	-0.63231	0.002323	0.02237	down	sp|O48651|ERG1_PANGI Squalene monooxygenase OS=Panax ginseng PE=2 SV=1//0
Cla001337	5548.22	8418.61	-0.60156	0.0042337	0.035546	down	-//-
Cla001366	1227.72	1948.05	-0.66605	0.001833	0.018504	down	sp|O65420|VAL3_ARATH B3 domain-containing transcription factor VAL3 OS=Arabidopsis thaliana GN=VAL3 PE=3 SV=3//2.67839e-61
Cla001367	2045.06	3119.91	-0.60936	0.0034898	0.030663	down	sp|Q0D5G4|Y7633_ORYSJ B3 domain-containing protein Os07g0563300 OS=Oryza sativa subsp. japonica GN=Os07g0563300 PE=3 SV=2//1.00636e-107
Cla001445	4.44019	36.7025	-3.0472	0.00033058	0.0045029	down	-//-
Cla001496	35.3844	279.931	-2.9839	0.001132	0.012333	down	sp|Q9FY94|SWT15_ARATH Bidirectional sugar transporter SWEET15 OS=Arabidopsis thaliana GN=SWEET15 PE=2 SV=1//9.23344e-90
Cla001500	918.219	4287.87	-2.2234	8.6308e-20	1.9277e-17	down	sp|Q9SGU2|SAU71_ARATH Auxin-responsive protein SAUR71 OS=Arabidopsis thaliana GN=SAUR71 PE=2 SV=1//2.00116e-13
Cla001534	9.95666	167.176	-4.0696	3.8945e-09	1.7397e-07	down	sp|Q4PT23|WTR6_ARATH WAT1-related protein At1g25270 OS=Arabidopsis thaliana GN=At1g25270 PE=2 SV=1//4.07218e-72
Cla001586	73.4098	160.298	-1.1267	0.0049721	0.039904	down	sp|Q40220|RAC2_LOTJA Rac-like GTP-binding protein RAC2 OS=Lotus japonicus GN=RAC2 PE=2 SV=1//8.4805e-95
Cla001615	17.6143	71.3843	-2.0189	0.00040314	0.005325	down	sp|P33629|TBA_PRUDU Tubulin alpha chain OS=Prunus dulcis GN=TUBA PE=2 SV=1//0
Cla001621	10972	33839.5	-1.6249	0.00014042	0.0021852	down	sp|P09042|PR1C_TOBAC Pathogenesis-related protein 1C OS=Nicotiana tabacum PE=2 SV=3//2.24252e-68
Cla001643	843.217	1333.5	-0.66124	0.0031745	0.028478	down	sp|Q8W468|ARI8_ARATH Probable E3 ubiquitin-protein ligase ARI8 OS=Arabidopsis thaliana GN=ARI8 PE=2 SV=1//2.45341e-162
Cla001644	193.158	333.059	-0.786	0.0063656	0.048532	down	sp|Q8W468|ARI8_ARATH Probable E3 ubiquitin-protein ligase ARI8 OS=Arabidopsis thaliana GN=ARI8 PE=2 SV=1//1.03839e-37
Cla001645	221.682	401.497	-0.8569	0.0016212	0.016753	down	-//-
Cla001668	1037.22	1633.99	-0.65568	0.0029518	0.027023	down	sp|Q86JE5|ERD2_DICDI ER lumen protein-retaining receptor OS=Dictyostelium discoideum GN=kdelr PE=3 SV=1//2.40628e-20
Cla001694	7545.17	14575.7	-0.94994	4.2246e-06	0.00010471	down	sp|Q9FMY5|U2AFB_ARATH Splicing factor U2af small subunit B OS=Arabidopsis thaliana GN=U2AF35B PE=1 SV=1//5.70352e-122
Cla001800	840.254	1423.95	-0.761	0.0033512	0.02971	down	-//-
Cla001807	1738.77	2670.11	-0.61883	0.0032962	0.029329	down	sp|Q9FGD2|Y5698_ARATH Putative B3 domain-containing protein At5g66980 OS=Arabidopsis thaliana GN=At5g66980 PE=3 SV=1//6.05085e-17
Cla001828	1167.99	3983.43	-1.77	1.1579e-08	4.7512e-07	down	-//-
Cla001842	2138.03	4262.2	-0.99531	0.00082539	0.0095317	down	sp|Q9XEE2|ANXD2_ARATH Annexin D2 OS=Arabidopsis thaliana GN=ANN2 PE=1 SV=1//1.96328e-141
Cla001860	380.518	705.218	-0.89011	0.00021708	0.0031747	down	sp|Q9LQQ4|H2B1_ARATH Histone H2B.1 OS=Arabidopsis thaliana GN=At1g07790 PE=1 SV=3//5.02459e-61
Cla001861	1356.01	2620.75	-0.95061	0.0048021	0.038895	down	sp|Q9LQQ4|H2B1_ARATH Histone H2B.1 OS=Arabidopsis thaliana GN=At1g07790 PE=1 SV=3//4.15339e-29
Cla001917	1636.06	2807.13	-0.77887	0.0017084	0.017525	down	-//-
Cla001964	2381.69	3539.37	-0.57151	0.0046309	0.037972	down	sp|Q39117|TGT2_ARATH Trihelix transcription factor GT-2 OS=Arabidopsis thaliana GN=GT-2 PE=2 SV=1//2.75935e-16
Cla002098	5890.5	9232.1	-0.64827	0.0010326	0.011427	down	sp|Q6R3K6|YSL6_ARATH Probable metal-nicotianamine transporter YSL6 OS=Arabidopsis thaliana GN=YSL6 PE=2 SV=2//0
Cla002148	575.142	1121.76	-0.96377	2.5981e-05	0.00051582	down	sp|Q38970|ACC1_ARATH Acetyl-CoA carboxylase 1 OS=Arabidopsis thaliana GN=ACC1 PE=1 SV=1//0
Cla002175	33.1655	104.557	-1.6565	0.00031255	0.0042989	down	sp|Q9S9K4|ASPL2_ARATH Aspartic proteinase-like protein 2 OS=Arabidopsis thaliana GN=At1g65240 PE=1 SV=2//4.24242e-137
Cla002183	1093.91	1822.79	-0.73665	0.00061	0.0074331	down	sp|Q8BK64|AHSA1_MOUSE Activator of 90 kDa heat shock protein ATPase homolog 1 OS=Mus musculus GN=Ahsa1 PE=2 SV=2//1.02637e-06
Cla002227	1002.1	2210.02	-1.141	3.0186e-05	0.00058512	down	sp|Q9SE97|FH1_ARATH Formin-like protein 1 OS=Arabidopsis thaliana GN=FH1 PE=1 SV=1//3.43758e-08
Cla002264	26.8624	96.3851	-1.8432	0.00066097	0.0079336	down	-//-
Cla002327	1277.29	1920.32	-0.58826	0.0046549	0.038106	down	sp|Q8VXX5|SKS1_ARATH Monocopper oxidase-like protein SKS1 OS=Arabidopsis thaliana GN=SKS1 PE=1 SV=1//0
Cla002331	376.813	1074.15	-1.5113	1.1689e-10	6.6789e-09	down	sp|Q9LYP4|BAG3_ARATH BAG family molecular chaperone regulator 3 OS=Arabidopsis thaliana GN=BAG3 PE=1 SV=1//1.25139e-104
Cla002392	1308.62	2102.43	-0.68401	0.0017116	0.017549	down	sp|Q8GWR0|COX11_ARATH Cytochrome c oxidase assembly protein COX11, mitochondrial OS=Arabidopsis thaliana GN=COX11 PE=2 SV=1//4.94759e-117
Cla002439	37.9988	112.623	-1.5675	0.00066712	0.0079806	down	sp|F4IWA8|TBL41_ARATH Protein trichome birefringence-like 41 OS=Arabidopsis thaliana GN=TBL41 PE=2 SV=1//2.6464e-85
Cla002574	2794.96	4493.69	-0.68507	0.00076089	0.0089339	down	sp|Q9STL8|UFSP_ARATH Probable Ufm1-specific protease OS=Arabidopsis thaliana GN=At3g48380 PE=1 SV=2//0
Cla002586	31.9477	90.4152	-1.5009	0.0015897	0.0165	down	sp|Q6K5K2|Y2982_ORYSJ B3 domain-containing protein Os02g0598200 OS=Oryza sativa subsp. japonica GN=Os02g0598200 PE=2 SV=1//4.20027e-13
Cla002607	366.809	622.135	-0.7622	0.002088	0.020571	down	sp|Q08480|KAD4_ORYSJ Adenylate kinase 4 OS=Oryza sativa subsp. japonica GN=ADK-B PE=2 SV=1//6.07366e-167
Cla002767	0.313439	53.1387	-7.4054	0.0061254	0.047121	down	-//-
Cla002890	1380.45	2464.52	-0.83617	0.0017858	0.018093	down	sp|Q4V3D9|SSL10_ARATH Protein STRICTOSIDINE SYNTHASE-LIKE 10 OS=Arabidopsis thaliana GN=SSL10 PE=2 SV=1//1.61528e-168
Cla002896	473.884	760.105	-0.68166	0.0030666	0.02775	down	sp|Q9M1J2|RPE5A_ARATH DNA-directed RNA polymerase V subunit 5A OS=Arabidopsis thaliana GN=NRPE5A PE=1 SV=1//2.60218e-75
Cla002900	379.436	697.447	-0.87823	0.00035765	0.0048016	down	sp|Q9LZA4|PMT7_ARATH Probable methyltransferase PMT7 OS=Arabidopsis thaliana GN=At5g04060 PE=2 SV=1//0
Cla002955	271.027	525.781	-0.95603	0.00032725	0.0044637	down	sp|O48837|LRKS2_ARATH Receptor like protein kinase S.2 OS=Arabidopsis thaliana GN=LECRKS2 PE=2 SV=2//5.84263e-55
Cla002959	233.953	399.036	-0.7703	0.0056707	0.044159	down	sp|Q9SVQ0|ERF62_ARATH Ethylene-responsive transcription factor ERF062 OS=Arabidopsis thaliana GN=ERF062 PE=2 SV=1//4.00575e-43
Cla002963	25.8587	81.1905	-1.6507	0.0031536	0.028316	down	sp|Q9SFU3|PPA15_ARATH Purple acid phosphatase 15 OS=Arabidopsis thaliana GN=PAP15 PE=1 SV=1//0
Cla003013	165.008	340.552	-1.0453	0.00048911	0.0062425	down	sp|Q9M2Y7|PP274_ARATH Pentatricopeptide repeat-containing protein At3g49710 OS=Arabidopsis thaliana GN=PCMP-H79 PE=2 SV=1//0
Cla003178	59.2136	282.046	-2.2519	0.0013762	0.014629	down	-//-
Cla003239	213.796	368.783	-0.78654	0.0053898	0.042528	down	-//-
Cla003259	300.76	583.757	-0.95675	0.0010677	0.011756	down	sp|Q8H184|PT106_ARATH Probable sugar phosphate/phosphate translocator At1g06470 OS=Arabidopsis thaliana GN=At1g06470 PE=2 SV=1//8.50954e-152
Cla003276	1036.5	1600.19	-0.62653	0.0046857	0.038279	down	sp|Q9FJ62|GPDL4_ARATH Glycerophosphodiester phosphodiesterase GDPDL4 OS=Arabidopsis thaliana GN=GDPDL4 PE=1 SV=1//0
Cla003315	50.6529	122.206	-1.2706	0.0026946	0.025148	down	-//-
Cla003339	3789.46	6443.6	-0.76588	0.00011331	0.001821	down	sp|P46256|ALF1_PEA Fructose-bisphosphate aldolase, cytoplasmic isozyme 1 OS=Pisum sativum PE=2 SV=1//0
Cla003358	2.22432	22.1062	-3.313	0.0045471	0.037489	down	sp|Q9ZVH3|ORC6_ARATH Origin of replication complex subunit 6 OS=Arabidopsis thaliana GN=ORC6 PE=1 SV=2//2.49924e-112
Cla003365	586.804	1145.63	-0.9652	0.0039748	0.033894	down	sp|Q9LSD6|ARP2_ARATH Actin-related protein 2 OS=Arabidopsis thaliana GN=ARP2 PE=1 SV=1//0
Cla003423	0.643762	430.71	-9.386	8.9848e-42	1.2614e-38	down	-//-
Cla003508	512.64	832.126	-0.69886	0.0062296	0.047662	down	sp|Q9LK31|Y3272_ARATH Kelch repeat-containing protein At3g27220 OS=Arabidopsis thaliana GN=At3g27220 PE=2 SV=1//0
Cla003607	23.3033	71.1704	-1.6107	0.0035683	0.031157	down	sp|Q6E7H0|ORC3_ARATH Origin of replication complex subunit 3 OS=Arabidopsis thaliana GN=ORC3 PE=1 SV=1//1.66841e-142
Cla003665	1963.66	3047.68	-0.63416	0.0031169	0.028115	down	sp|O65202|ACOX1_ARATH Peroxisomal acyl-coenzyme A oxidase 1 OS=Arabidopsis thaliana GN=ACX1 PE=1 SV=1//0
Cla003685	443.93	5641.97	-3.6678	0.00074272	0.0087361	down	-//-
Cla003858	865.76	1368.37	-0.66042	0.0043997	0.036543	down	sp|Q710E8|ORC1A_ARATH Origin of replication complex subunit 1A OS=Arabidopsis thaliana GN=ORC1A PE=1 SV=1//0
Cla003881	843.461	1371.75	-0.70162	0.0020719	0.020423	down	sp|Q5XVJ4|FAN1_ARATH Fanconi-associated nuclease 1 homolog OS=Arabidopsis thaliana GN=At1g48360 PE=2 SV=2//0
Cla003925	265.758	931.869	-1.81	1.8008e-13	1.5801e-11	down	sp|P34893|CH10_ARATH 10 kDa chaperonin OS=Arabidopsis thaliana GN=CPN10 PE=3 SV=1//8.12141e-41
Cla003926	34.8877	182.65	-2.3883	4.544e-09	1.9923e-07	down	sp|Q5RM09|Y1592_ARATH B3 domain-containing protein At1g05920 OS=Arabidopsis thaliana GN=At1g05920 PE=2 SV=1//3.60613e-14
Cla003940	2304.13	8030.58	-1.8013	0.00019993	0.0029681	down	sp|P17407|21KD_DAUCA 21 kDa protein OS=Daucus carota PE=2 SV=1//1.54607e-38
Cla003941	2.51595	23.9196	-3.249	0.0029891	0.027229	down	sp|Q9CAC1|GUN8_ARATH Endoglucanase 8 OS=Arabidopsis thaliana GN=CEL1 PE=2 SV=1//0
Cla003942	346.123	562.962	-0.70175	0.0042029	0.035348	down	-//-
Cla003961	678.078	1058.64	-0.64269	0.0055427	0.04349	down	sp|Q8L612|MACP1_ARATH MACPF domain-containing protein At1g14780 OS=Arabidopsis thaliana GN=At1g14780 PE=2 SV=1//1.51284e-163
Cla003962	230.391	403.148	-0.80722	0.0029494	0.027014	down	sp|Q8L612|MACP1_ARATH MACPF domain-containing protein At1g14780 OS=Arabidopsis thaliana GN=At1g14780 PE=2 SV=1//1.55368e-61
Cla003977	7342.82	16906.9	-1.2032	0.00016961	0.0025842	down	sp|Q39547|CUCM1_CUCME Cucumisin OS=Cucumis melo PE=1 SV=1//0
Cla004014	61.9784	134.629	-1.1191	0.0036778	0.031929	down	sp|Q10DV7|ACT1_ORYSJ Actin-1 OS=Oryza sativa subsp. japonica GN=ACT1 PE=2 SV=1//0
Cla004015	619.171	1059.59	-0.77509	0.00055563	0.0068965	down	sp|Q9VLQ1|ALG5_DROME Dolichyl-phosphate beta-glucosyltransferase OS=Drosophila melanogaster GN=wol PE=1 SV=1//1.23965e-80
Cla004028	12.9065	62.0764	-2.266	0.00026822	0.0037815	down	sp|Q9LX14|UFC_ARATH Protein UPSTREAM OF FLC OS=Arabidopsis thaliana GN=UFC PE=2 SV=1//1.18772e-28
Cla004098	4620.99	7254.22	-0.65062	0.0010907	0.011936	down	sp|Q8S3D1|BH068_ARATH Transcription factor bHLH68 OS=Arabidopsis thaliana GN=BHLH68 PE=2 SV=2//4.07938e-76
Cla004213	8.55423	45.6932	-2.4173	0.00073997	0.0087142	down	sp|Q84JK8|MAKR6_ARATH Probable membrane-associated kinase regulator 6 OS=Arabidopsis thaliana GN=MAKR6 PE=2 SV=1//7.38694e-41
Cla004242	278.508	716.293	-1.3628	2.275e-07	7.3063e-06	down	sp|Q94BN2|SPSY_ARATH Spermine synthase OS=Arabidopsis thaliana GN=SPMS PE=1 SV=1//0
Cla004260	12.6909	61.6087	-2.2793	0.00020874	0.0030732	down	sp|Q9SF32|IQD1_ARATH Protein IQ-DOMAIN 1 OS=Arabidopsis thaliana GN=IQD1 PE=1 SV=1//7.91285e-09
Cla004270	596.787	1073.36	-0.84685	0.00031646	0.0043466	down	sp|Q8BP92|RCN2_MOUSE Reticulocalbin-2 OS=Mus musculus GN=Rcn2 PE=2 SV=1//4.9583e-09
Cla004274	102.876	205.856	-1.0007	0.0031453	0.028275	down	sp|Q8LAP8|DOF46_ARATH Dof zinc finger protein DOF4.6 OS=Arabidopsis thaliana GN=DOF4.6 PE=2 SV=2//5.55731e-32
Cla004312	3865.52	6232.88	-0.68923	0.0005586	0.0069217	down	sp|P05478|HSP16_SOYBN 18.5 kDa class I heat shock protein OS=Glycine max GN=HSP18.5-C PE=3 SV=1//9.22362e-69
Cla004402	568.472	988.895	-0.79873	0.00045828	0.0059066	down	sp|Q84N64|ARC5_ARATH Dynamin-like protein ARC5 OS=Arabidopsis thaliana GN=ARC5 PE=1 SV=2//0
Cla004420	2051.08	4127.04	-1.0087	6.8039e-05	0.0011772	down	sp|F4IDU4|MBOA1_ARATH Lysophospholipid acyltransferase 1 OS=Arabidopsis thaliana GN=LPLAT1 PE=1 SV=1//0
Cla004449	1162.55	1902.88	-0.71088	0.0011205	0.012222	down	sp|Q39254|CAX2_ARATH Vacuolar cation/proton exchanger 2 OS=Arabidopsis thaliana GN=CAX2 PE=1 SV=2//4.75782e-160
Cla004450	39.4041	127.894	-1.6985	6.9857e-05	0.0012034	down	sp|Q9LSI7|MYB35_ARATH Transcription factor MYB35 OS=Arabidopsis thaliana GN=MYB35 PE=2 SV=1//6.82659e-63
Cla004456	298.286	553.557	-0.89204	0.00066023	0.007932	down	-//-
Cla004568	7.87391	54.3541	-2.7872	0.002219	0.02158	down	sp|P30236|HSP41_SOYBN 22.0 kDa class IV heat shock protein OS=Glycine max GN=HSP22.0 PE=3 SV=1//3.29815e-27
Cla004621	93.9984	193.827	-1.0441	0.0028515	0.026251	down	sp|Q8RY46|AB26B_ARATH ABC transporter B family member 26, chloroplastic OS=Arabidopsis thaliana GN=ABCB26 PE=2 SV=1//0
Cla004677	4849.29	16537	-1.7698	5.63e-08	2.0304e-06	down	sp|Q9LHA8|MD37C_ARATH Probable mediator of RNA polymerase II transcription subunit 37c OS=Arabidopsis thaliana GN=MED37C PE=1 SV=1//0
Cla004713	743.847	1206.63	-0.69791	0.0016622	0.017132	down	-//-
Cla004759	22.725	90.9564	-2.0009	0.00012685	0.0020042	down	sp|Q94F88|CMT3_ARATH DNA (cytosine-5)-methyltransferase CMT3 OS=Arabidopsis thaliana GN=CMT3 PE=1 SV=2//0
Cla004816	1036	1570.93	-0.60059	0.0051606	0.041016	down	sp|Q9FGH9|E70B1_ARATH Exocyst complex component EXO70B1 OS=Arabidopsis thaliana GN=EXO70B1 PE=1 SV=1//1.41574e-109
Cla004866	47.5159	113.296	-1.2536	0.0035631	0.031129	down	sp|Q9FIM9|CAMK4_ARATH CDPK-related kinase 4 OS=Arabidopsis thaliana GN=CRK4 PE=2 SV=1//0
Cla004880	587.467	1330.32	-1.1792	0.00015976	0.0024531	down	sp|Q8LAP8|DOF46_ARATH Dof zinc finger protein DOF4.6 OS=Arabidopsis thaliana GN=DOF4.6 PE=2 SV=2//2.41129e-34
Cla004897	3069.78	5116	-0.73688	0.00024335	0.0034836	down	sp|Q9LV09|BOB1_ARATH Protein BOBBER 1 OS=Arabidopsis thaliana GN=BOB1 PE=1 SV=1//2.13046e-103
Cla004930	0.941708	23.6512	-4.6505	0.00032474	0.004442	down	sp|Q9FLV9|SLAH3_ARATH S-type anion channel SLAH3 OS=Arabidopsis thaliana GN=SLAH3 PE=1 SV=1//0
Cla004976	201.807	469.323	-1.2176	0.0047196	0.038443	down	-//-
Cla004982	34.341	258.027	-2.9095	8.8882e-05	0.0014767	down	sp|Q05963|FL3H_CALCH Naringenin,2-oxoglutarate 3-dioxygenase OS=Callistephus chinensis GN=FHT PE=2 SV=1//3.58354e-73
Cla004988	953.909	1516.47	-0.66879	0.0028427	0.026182	down	-//-
Cla005053	246.08	508.672	-1.0476	0.0029628	0.027073	down	sp|Q9LQR0|LBD1_ARATH LOB domain-containing protein 1 OS=Arabidopsis thaliana GN=LBD1 PE=2 SV=1//4.20901e-63
Cla005076	5670.84	8472.89	-0.57929	0.003015	0.027397	down	sp|Q93Z16|RPN2_ARATH Dolichyl-diphosphooligosaccharide--protein glycosyltransferase subunit 2 OS=Arabidopsis thaliana GN=RPN2 PE=2 SV=1//0
Cla005118	1062.87	1795.62	-0.75651	0.00042057	0.0055145	down	sp|Q5JME8|DI195_ORYSJ Protein DEHYDRATION-INDUCED 19 homolog 5 OS=Oryza sativa subsp. japonica GN=DI19-5 PE=2 SV=1//1.02371e-29
Cla005123	1797.97	3335.1	-0.89136	2.1791e-05	0.00044291	down	sp|Q9FGS4|NADA_ARATH Quinolinate synthase, chloroplastic OS=Arabidopsis thaliana GN=QS PE=1 SV=1//0
Cla005127	19205.9	31452.8	-0.71164	0.00086557	0.0098854	down	sp|P24465|C71A1_PERAE Cytochrome P450 71A1 OS=Persea americana GN=CYP71A1 PE=1 SV=2//3.17622e-166
Cla005135	122.556	326.983	-1.4158	0.00066401	0.007958	down	sp|Q8LPH6|MYB86_ARATH Transcription factor MYB86 OS=Arabidopsis thaliana GN=MYB86 PE=2 SV=1//1.164e-82
Cla005143	236.002	544.37	-1.2058	7.4372e-06	0.0001734	down	-//-
Cla005159	1.87497	32.5519	-4.1178	0.0011609	0.012627	down	sp|Q9C7X5|NAS4_ARATH Probable nicotianamine synthase 4 OS=Arabidopsis thaliana GN=NAS4 PE=2 SV=1//3.24994e-122
Cla005175	3898.57	8838	-1.1808	6.2802e-09	2.6718e-07	down	sp|O80492|P2C05_ARATH Probable protein phosphatase 2C 5 OS=Arabidopsis thaliana GN=At1g09160 PE=2 SV=1//0
Cla005190	2339.05	4426.37	-0.9202	9.8435e-06	0.00022061	down	sp|Q1ZXH4|EMC6_DICDI ER membrane protein complex subunit 6 OS=Dictyostelium discoideum GN=emc6 PE=3 SV=1//7.29547e-11
Cla005193	112.301	218.128	-0.9578	0.0026826	0.025063	down	sp|Q9VM17|SOSSB_DROME SOSS complex subunit B homolog OS=Drosophila melanogaster GN=CG5181 PE=2 SV=1//3.5191e-19
Cla005197	2988.35	4540.35	-0.60346	0.0037806	0.03261	down	sp|Q9XFR5|SR30_ARATH Serine/arginine-rich splicing factor SR30 OS=Arabidopsis thaliana GN=SR30 PE=1 SV=1//8.91595e-94
Cla005202	2517.59	4947.21	-0.97457	3.9466e-06	9.8314e-05	down	sp|P36181|HSP80_SOLLC Heat shock cognate protein 80 OS=Solanum lycopersicum GN=HSC80 PE=2 SV=1//0
Cla005204	185.887	572.781	-1.6236	0.00021915	0.0032002	down	sp|P36181|HSP80_SOLLC Heat shock cognate protein 80 OS=Solanum lycopersicum GN=HSC80 PE=2 SV=1//0
Cla005206	89.7638	424.249	-2.2407	0.00050302	0.0063827	down	sp|P36181|HSP80_SOLLC Heat shock cognate protein 80 OS=Solanum lycopersicum GN=HSC80 PE=2 SV=1//0
Cla005237	258.446	531.427	-1.04	5.8261e-05	0.0010279	down	sp|Q9FZ42|GRDH1_ARATH Glucose and ribitol dehydrogenase homolog 1 OS=Arabidopsis thaliana GN=At1g54870 PE=2 SV=1//1.96966e-164
Cla005242	219.341	448.65	-1.0324	0.00018357	0.0027521	down	sp|Q9FR37|AMI1_ARATH Amidase 1 OS=Arabidopsis thaliana GN=AMI1 PE=1 SV=1//7.76753e-173
Cla005345	255.329	450.205	-0.81823	0.0018026	0.018234	down	sp|Q8GXV5|UGHY_ARATH (S)-ureidoglycine aminohydrolase OS=Arabidopsis thaliana GN=UGLYAH PE=1 SV=1//3.16586e-164
Cla005346	568.04	1176.24	-1.0501	0.0017808	0.018052	down	sp|Q9FLP0|MA651_ARATH 65-kDa microtubule-associated protein 1 OS=Arabidopsis thaliana GN=MAP65-1 PE=1 SV=1//0
Cla005408	3292.41	5627.33	-0.77331	0.00017745	0.0026849	down	sp|P49332|GSTXC_TOBAC Probable glutathione S-transferase parC OS=Nicotiana tabacum GN=PARC PE=2 SV=1//2.71615e-116
Cla005431	3713.89	8295.48	-1.1594	1.1358e-08	4.6803e-07	down	sp|Q9SKX5|PAO2_ARATH Probable polyamine oxidase 2 OS=Arabidopsis thaliana GN=PAO2 PE=2 SV=1//0
Cla005459	177.003	330.342	-0.90019	0.0024236	0.023102	down	-//-
Cla005467	1309.75	2312.87	-0.82039	0.00013924	0.0021686	down	sp|Q940A6|PP325_ARATH Pentatricopeptide repeat-containing protein At4g19440, chloroplastic OS=Arabidopsis thaliana GN=At4g19440 PE=2 SV=2//0
Cla005483	18371.9	30549.8	-0.73366	0.00027988	0.0039224	down	sp|Q84XA3|IMDH_VIGUN Inosine-5&apos;-monophosphate dehydrogenase OS=Vigna unguiculata GN=impdh PE=1 SV=1//0
Cla005522	12102.7	20602.2	-0.76748	8.1391e-05	0.0013661	down	sp|Q6ZI17|OML2_ORYSJ Protein MEI2-like 2 OS=Oryza sativa subsp. japonica GN=ML2 PE=2 SV=1//0
Cla005601	965.137	1630.06	-0.75612	0.00054732	0.0068302	down	sp|Q9LVU1|VAP21_ARATH Vesicle-associated protein 2-1 OS=Arabidopsis thaliana GN=PVA21 PE=1 SV=1//8.37895e-91
Cla005623	46.2262	199.1	-2.1067	0.0027131	0.025285	down	sp|Q9SUK8|ERF39_ARATH Ethylene-responsive transcription factor ERF039 OS=Arabidopsis thaliana GN=ERF039 PE=2 SV=1//2.82877e-44
Cla005631	11.3238	42.9446	-1.9231	0.0056078	0.043843	down	sp|Q9FGL1|PP423_ARATH Putative pentatricopeptide repeat-containing protein At5g47460 OS=Arabidopsis thaliana GN=PCMP-E103 PE=3 SV=1//2.2397e-172
Cla005643	2133.89	6298.93	-1.5616	9.2413e-11	5.3266e-09	down	sp|Q766C3|NEP1_NEPGR Aspartic proteinase nepenthesin-1 OS=Nepenthes gracilis GN=nep1 PE=1 SV=1//9.59863e-21
Cla005645	3962.99	10264.4	-1.373	2.2938e-11	1.4831e-09	down	sp|P11890|HS23C_OXYRB Small heat shock protein, chloroplastic OS=Oxybasis rubra GN=HSP23 PE=2 SV=1//1.19148e-48
Cla005646	694.527	1158.47	-0.73811	0.00079787	0.0092848	down	sp|O81316|SCL6_ARATH Scarecrow-like protein 6 OS=Arabidopsis thaliana GN=SCL6 PE=1 SV=1//2.13612e-124
Cla005689	309.505	656.858	-1.0856	1.367e-05	0.00029268	down	sp|Q8L733|Y4121_ARATH Putative transferase At4g12130, mitochondrial OS=Arabidopsis thaliana GN=At4g12130 PE=1 SV=1//6.47435e-165
Cla005697	176.043	515.04	-1.5488	0.0053565	0.042347	down	sp|Q8L7W5|SMO11_ARATH Methylsterol monooxygenase 1-1 OS=Arabidopsis thaliana GN=SMO1-1 PE=1 SV=1//1.27631e-129
Cla005713	10.9611	44.2985	-2.0149	0.0040919	0.034622	down	-//-
Cla005777	6337	13859.7	-1.129	9.7831e-07	2.7548e-05	down	sp|P26413|HSP70_SOYBN Heat shock 70 kDa protein OS=Glycine max GN=HSP70 PE=3 SV=1//0
Cla005779	64.6922	184.942	-1.5154	5.6647e-05	0.0010031	down	sp|Q8S8S7|PUB34_ARATH U-box domain-containing protein 34 OS=Arabidopsis thaliana GN=PUB34 PE=3 SV=1//7.08257e-113
Cla005806	2766.56	4500.93	-0.70213	0.00048429	0.006197	down	sp|F4IAT2|THOC2_ARATH THO complex subunit 2 OS=Arabidopsis thaliana GN=THO2 PE=1 SV=1//1.05505e-26
Cla005816	413.711	1215.72	-1.5551	2.3544e-11	1.5172e-09	down	sp|Q9SIS3|MA656_ARATH 65-kDa microtubule-associated protein 6 OS=Arabidopsis thaliana GN=MAP65-6 PE=1 SV=1//0
Cla005818	791.658	1348.05	-0.76792	0.00036016	0.0048287	down	sp|Q9LDE2|BPC2_ARATH Protein BASIC PENTACYSTEINE2 OS=Arabidopsis thaliana GN=BPC2 PE=1 SV=1//2.98511e-93
Cla005829	79.2276	312.917	-1.9817	5.9028e-10	2.9641e-08	down	sp|Q6NLW5|XRI1_ARATH Protein XRI1 OS=Arabidopsis thaliana GN=XRI1 PE=1 SV=2//1.33018e-15
Cla005835	246.175	420.173	-0.7713	0.0030274	0.027472	down	sp|Q6F6B5|ARC3_ARATH Protein ACCUMULATION AND REPLICATION OF CHLOROPLASTS 3 OS=Arabidopsis thaliana GN=ARC3 PE=1 SV=2//7.06404e-103
Cla005842	619.26	1142.76	-0.8839	0.00011032	0.0017757	down	sp|Q56XX3|Y2215_ARATH Uncharacterized protein At2g02148 OS=Arabidopsis thaliana GN=At2g02148 PE=2 SV=1//9.35998e-131
Cla005852	6230.14	10209.3	-0.71255	0.0003364	0.0045663	down	sp|Q949X9|LPR2_ARATH Multicopper oxidase LPR2 OS=Arabidopsis thaliana GN=LPR2 PE=2 SV=1//0
Cla005874	11.7139	59.6799	-2.349	0.0002036	0.0030115	down	-//-
Cla005930	500.941	979.38	-0.96723	0.0043392	0.036163	down	sp|Q1PEM5|PERK3_ARATH Proline-rich receptor-like protein kinase PERK3 OS=Arabidopsis thaliana GN=PERK3 PE=2 SV=2//2.24572e-55
Cla005940	211.305	394.399	-0.90033	0.00083083	0.0095777	down	sp|Q7XHL3|TYDC1_ORYSJ Tyrosine decarboxylase 1 OS=Oryza sativa subsp. japonica GN=Os07g0437500 PE=2 SV=1//0
Cla005958	2292.25	3685.85	-0.68523	0.00078059	0.0091271	down	sp|Q4VCM1|LCAT2_ARATH Phospholipid--sterol O-acyltransferase OS=Arabidopsis thaliana GN=PSAT PE=2 SV=2//0
Cla005994	971.466	1592.46	-0.71302	0.00069935	0.0082905	down	sp|Q9ZP54|PARP1_ARATH Poly [ADP-ribose] polymerase 1 OS=Arabidopsis thaliana GN=PARP1 PE=1 SV=2//0
Cla006016	661.056	1084.47	-0.71415	0.0011684	0.012695	down	sp|Q9SMU7|SRP09_ARATH Signal recognition particle 9 kDa protein OS=Arabidopsis thaliana GN=SRP9 PE=3 SV=1//1.71473e-64
Cla006023	49.5128	547.251	-3.4663	0.00093571	0.010582	down	-//-
Cla006025	38.4362	176.777	-2.2014	0.00021369	0.0031391	down	sp|O23628|H2AV1_ARATH Histone H2A variant 1 OS=Arabidopsis thaliana GN=H2AV PE=1 SV=1//2.24949e-69
Cla006043	509.673	792.093	-0.6361	0.0060377	0.046573	down	sp|A8LC45|RL24_FRASN 50S ribosomal protein L24 OS=Frankia sp. (strain EAN1pec) GN=rplX PE=3 SV=1//3.40039e-26
Cla006050	79.5081	225.269	-1.5025	9.707e-06	0.00021805	down	sp|P80728|MAVI_CUCPE Mavicyanin OS=Cucurbita pepo PE=1 SV=1//7.14148e-62
Cla006132	30.9652	99.0308	-1.6772	0.00032476	0.004442	down	sp|Q9FLX4|MAKR5_ARATH Probable membrane-associated kinase regulator 5 OS=Arabidopsis thaliana GN=MAKR5 PE=2 SV=1//2.80376e-17
Cla006145	408.883	1567.73	-1.9389	3.1819e-09	1.4377e-07	down	-//-
Cla006174	3508.78	5683.37	-0.69578	0.00066756	0.0079811	down	sp|Q2TBL4|RPC3_BOVIN DNA-directed RNA polymerase III subunit RPC3 OS=Bos taurus GN=POLR3C PE=2 SV=1//1.57004e-19
Cla006181	655.803	1039.29	-0.66426	0.0042502	0.035639	down	sp|P93788|REMO_SOLTU Remorin OS=Solanum tuberosum PE=1 SV=1//1.98376e-28
Cla006210	105.711	230.864	-1.1269	0.00078671	0.0091876	down	sp|Q9LYP5|ARR21_ARATH Putative two-component response regulator ARR21 OS=Arabidopsis thaliana GN=ARR21 PE=2 SV=3//5.8436e-48
Cla006234	142.933	277.428	-0.95677	0.0015955	0.016527	down	sp|O65351|SBT17_ARATH Subtilisin-like protease SBT1.7 OS=Arabidopsis thaliana GN=SBT1.7 PE=1 SV=1//0
Cla006244	1512.9	2426.42	-0.68152	0.0015164	0.015904	down	sp|Q8VYR9|KEA5_ARATH K(+) efflux antiporter 5 OS=Arabidopsis thaliana GN=KEA5 PE=2 SV=1//0
Cla006287	34.3503	96.1181	-1.4845	0.0028176	0.025988	down	sp|P68428|H32_WHEAT Histone H3.2 OS=Triticum aestivum PE=1 SV=2//3.38945e-80
Cla006288	12.9353	51.3751	-1.9898	0.0019483	0.019395	down	-//-
Cla006295	2278.54	3475.94	-0.60929	0.0035198	0.030816	down	sp|A3BDI8|SAP8_ORYSJ Zinc finger A20 and AN1 domain-containing stress-associated protein 8 OS=Oryza sativa subsp. japonica GN=SAP8 PE=2 SV=1//1.59614e-42
Cla006319	1421.48	2459.93	-0.79123	0.00012424	0.0019709	down	sp|Q9LPS1|HXK3_ARATH Hexokinase-3 OS=Arabidopsis thaliana GN=At1g50460 PE=1 SV=1//0
Cla006359	3756.43	5529.94	-0.5579	0.0047729	0.038733	down	sp|Q9SLN8|DBR_TOBAC 2-alkenal reductase (NADP(+)-dependent) OS=Nicotiana tabacum GN=DBR PE=1 SV=1//1.98568e-178
Cla006360	826.054	1308.48	-0.66358	0.0031267	0.028178	down	sp|Q9SLN8|DBR_TOBAC 2-alkenal reductase (NADP(+)-dependent) OS=Nicotiana tabacum GN=DBR PE=1 SV=1//1.46271e-175
Cla006400	0	14.8807	#NAME?	0.00082025	0.0094856	down	sp|Q75VW3|DNAJ_HYDTT Chaperone protein DnaJ OS=Hydrogenobacter thermophilus (strain DSM 6534 / IAM 12695 / TK-6) GN=dnaJ PE=3 SV=1//2.73606e-12
Cla006403	210.409	820.818	-1.9639	0.002476	0.023488	down	sp|Q8VYI9|NLTL5_ARATH Non-specific lipid-transfer protein-like protein At5g64080 OS=Arabidopsis thaliana GN=At5g64080 PE=1 SV=1//3.01112e-36
Cla006418	482.774	763.956	-0.66214	0.0055227	0.043367	down	sp|Q9C701|BUB32_ARATH Mitotic checkpoint protein BUB3.2 OS=Arabidopsis thaliana GN=BUB3.2 PE=2 SV=1//0
Cla006484	3470.91	5156.08	-0.57096	0.0053121	0.042033	down	sp|Q01899|HSP7M_PHAVU Heat shock 70 kDa protein, mitochondrial OS=Phaseolus vulgaris PE=2 SV=1//0
Cla006520	1486.02	2271.59	-0.61225	0.0032438	0.028981	down	sp|Q94IG7|PPOCM_SPIOL Protoporphyrinogen oxidase, chloroplastic/mitochondrial OS=Spinacia oleracea GN=POX2 PE=1 SV=1//1.24401e-169
Cla006552	597.562	1529.77	-1.3562	1.1256e-09	5.4093e-08	down	sp|Q8W487|YB95_ARATH Uncharacterized protein At2g39795, mitochondrial OS=Arabidopsis thaliana GN=At2g39795 PE=2 SV=1//1.30012e-66
Cla006592	231.031	403.975	-0.80618	0.0041224	0.034832	down	sp|Q0UPV4|PSF3_PHANO DNA replication complex GINS protein PSF3 OS=Phaeosphaeria nodorum (strain SN15 / ATCC MYA-4574 / FGSC 10173) GN=PSF3 PE=3 SV=1//8.78672e-23
Cla006596	1228.12	2138.6	-0.80021	0.00011583	0.0018584	down	sp|A0R574|CLPC1_MYCS2 ATP-dependent Clp protease ATP-binding subunit ClpC1 OS=Mycobacterium smegmatis (strain ATCC 700084 / mc(2)155) GN=clpC1 PE=3 SV=1//6.40039e-14
Cla006608	4.71986	71.1162	-3.9134	0.00012516	0.0019823	down	sp|Q9C0H6|KLHL4_HUMAN Kelch-like protein 4 OS=Homo sapiens GN=KLHL4 PE=1 SV=2//9.96e-24
Cla006682	67.1304	517.49	-2.9465	6.6928e-09	2.8351e-07	down	sp|Q9S818|FL3H_ARATH Naringenin,2-oxoglutarate 3-dioxygenase OS=Arabidopsis thaliana GN=F3H PE=1 SV=1//7.7584e-154
Cla006748	6820.31	11385	-0.73923	0.00017095	0.0025989	down	sp|Q6WNQ8|C81E8_MEDTR Cytochrome P450 81E8 OS=Medicago truncatula GN=CYP81E8 PE=2 SV=1//2.91024e-126
Cla006750	1626.88	3915.21	-1.267	2.5247e-09	1.1567e-07	down	-//-
Cla006751	448.736	1803.29	-2.0067	0.00028992	0.004034	down	sp|O22187|Y2232_ARATH Probable receptor-like protein kinase At2g23200 OS=Arabidopsis thaliana GN=At2g23200 PE=3 SV=1//1.76311e-159
Cla006752	15.7323	56.0837	-1.8338	0.004718	0.038443	down	-//-
Cla006823	474.257	935.608	-0.98023	7.8215e-05	0.001323	down	sp|O81884|GALDH_ARATH L-galactose dehydrogenase OS=Arabidopsis thaliana GN=LGALDH PE=1 SV=1//0
Cla006826	291.976	485.488	-0.73359	0.0044631	0.036921	down	sp|Q8RY99|RECAM_ARATH DNA repair protein recA homolog 2, mitochondrial OS=Arabidopsis thaliana GN=At3g10140 PE=2 SV=1//9.43034e-105
Cla006875	2566.4	4437.18	-0.7899	9.5101e-05	0.0015642	down	-//-
Cla006880	224.904	1472.42	-2.7108	9.2849e-29	4.8025e-26	down	sp|Q9SSE5|COL9_ARATH Zinc finger protein CONSTANS-LIKE 9 OS=Arabidopsis thaliana GN=COL9 PE=2 SV=1//2.98246e-110
Cla006893	383.545	777.803	-1.02	2.6053e-05	0.00051672	down	sp|Q8W486|Y1491_ARATH Uncharacterized protein At1g04910 OS=Arabidopsis thaliana GN=At1g04910 PE=2 SV=1//1.43313e-74
Cla006922	324.531	605.297	-0.89929	0.00025001	0.0035557	down	sp|D4GU71|AGL14_HALVD Probable low-salt glycan biosynthesis reductase Agl14 OS=Haloferax volcanii (strain ATCC 29605 / DSM 3757 / JCM 8879 / NBRC 14742 / NCIMB 2012 / VKM B-1768 / DS2) GN=agl14 PE=3 SV=1//4.90227e-22
Cla006947	802.787	1238	-0.62492	0.0039225	0.03352	down	sp|O64639|Y2559_ARATH Receptor-like serine/threonine-protein kinase At2g45590 OS=Arabidopsis thaliana GN=At2g45590 PE=2 SV=1//2.14829e-178
Cla006952	231.161	475.169	-1.0395	0.0023698	0.022732	down	sp|O22126|FLA8_ARATH Fasciclin-like arabinogalactan protein 8 OS=Arabidopsis thaliana GN=FLA8 PE=1 SV=1//3.50779e-159
Cla006961	3617.96	11142.5	-1.6228	1.5956e-15	1.9724e-13	down	sp|Q40316|VESTR_MEDSA Vestitone reductase OS=Medicago sativa PE=1 SV=1//2.00931e-117
Cla006962	143.95	387.893	-1.4301	1.3031e-06	3.6022e-05	down	sp|Q40316|VESTR_MEDSA Vestitone reductase OS=Medicago sativa PE=1 SV=1//7.51601e-143
Cla006963	291.946	859.821	-1.5583	3.5893e-10	1.8964e-08	down	-//-
Cla006988	1625.42	2505.79	-0.62446	0.0031121	0.028085	down	sp|Q4PE39|SEC23_USTMA Protein transport protein SEC23 OS=Ustilago maydis (strain 521 / FGSC 9021) GN=SEC23 PE=3 SV=1//0
Cla006994	2734.48	4639.51	-0.76271	0.00023948	0.0034357	down	-//-
Cla006999	2606.32	5830.85	-1.1617	0.0030192	0.02741	down	-//-
Cla007000	791.591	1210.29	-0.61252	0.0045494	0.037492	down	sp|Q9LPF6|PUP11_ARATH Probable purine permease 11 OS=Arabidopsis thaliana GN=PUP11 PE=1 SV=1//9.22976e-137
Cla007051	12.2613	56.236	-2.1974	0.00083783	0.0096471	down	sp|Q9SVU0|YUC8_ARATH Probable indole-3-pyruvate monooxygenase YUCCA8 OS=Arabidopsis thaliana GN=YUC8 PE=2 SV=1//0
Cla007059	3105.17	6383.71	-1.0397	4.0798e-07	1.2389e-05	down	sp|Q7GB25|AB5C_ARATH ABC transporter C family member 5 OS=Arabidopsis thaliana GN=ABCC5 PE=2 SV=2//0
Cla007107	67.6827	168.44	-1.3154	0.00048244	0.0061774	down	sp|Q9LFT1|TBL21_ARATH Protein trichome birefringence-like 21 OS=Arabidopsis thaliana GN=TBL21 PE=3 SV=1//7.22818e-27
Cla007108	143.89	414.884	-1.5277	1.2227e-07	4.1796e-06	down	sp|Q9LFT0|TBL19_ARATH Protein trichome birefringence-like 19 OS=Arabidopsis thaliana GN=TBL19 PE=3 SV=1//1.45505e-103
Cla007110	311.54	701.521	-1.1711	0.0056517	0.044092	down	-//-
Cla007111	429.242	761.662	-0.82736	0.00080197	0.0093271	down	sp|Q94AS5|ICME_ARATH Isoprenylcysteine alpha-carbonyl methylesterase ICME OS=Arabidopsis thaliana GN=ICME PE=2 SV=1//0
Cla007263	1423.9	2594.95	-0.86586	0.00090017	0.010227	down	sp|Q5EA97|S38AB_BOVIN Putative sodium-coupled neutral amino acid transporter 11 OS=Bos taurus GN=SLC38A11 PE=2 SV=1//6.21249e-10
Cla007286	18009.9	29558.1	-0.71477	0.001097	0.011998	down	sp|Q8VXZ7|AGAL3_ARATH Alpha-galactosidase 3 OS=Arabidopsis thaliana GN=AGAL3 PE=1 SV=1//0
Cla007293	267.773	655.807	-1.2923	0.00043566	0.0056858	down	sp|Q6S4P4|RF2B_ORYSJ Transcription factor RF2b OS=Oryza sativa subsp. japonica GN=RF2b PE=1 SV=2//5.22175e-99
Cla007294	153.755	507.144	-1.7218	8.2763e-10	4.0872e-08	down	sp|Q8VZW3|CFI3_ARATH Probable chalcone--flavonone isomerase 3 OS=Arabidopsis thaliana GN=CHI3 PE=1 SV=1//1.51031e-33
Cla007303	430.737	728.968	-0.75905	0.0013299	0.014229	down	sp|Q949Q0|GPDA2_ARATH Glycerol-3-phosphate dehydrogenase [NAD(+)] 2, chloroplastic OS=Arabidopsis thaliana GN=GLY1 PE=1 SV=1//0
Cla007307	194.419	440.832	-1.1811	2.3391e-05	0.00047119	down	sp|Q9LY00|WRK70_ARATH Probable WRKY transcription factor 70 OS=Arabidopsis thaliana GN=WRKY70 PE=2 SV=1//2.40226e-27
Cla007322	256.344	432.393	-0.75426	0.0034941	0.030676	down	sp|Q8BJM3|R3HCL_MOUSE Coiled-coil domain-containing protein R3HCC1L OS=Mus musculus GN=R3hcc1l PE=2 SV=1//1.60617e-14
Cla007357	2037.52	3164.18	-0.63502	0.0029622	0.027073	down	sp|O81020|NPC2_ARATH Non-specific phospholipase C2 OS=Arabidopsis thaliana GN=NPC2 PE=2 SV=1//0
Cla007368	217.19	663.21	-1.6105	5.8968e-10	2.9641e-08	down	sp|Q94CK9|LRP1_ARATH Protein LATERAL ROOT PRIMORDIUM 1 OS=Arabidopsis thaliana GN=LRP1 PE=1 SV=1//7.4777e-41
Cla007444	50.9206	115.852	-1.186	0.0057775	0.044831	down	sp|Q05609|CTR1_ARATH Serine/threonine-protein kinase CTR1 OS=Arabidopsis thaliana GN=CTR1 PE=1 SV=1//3.87628e-44
Cla007476	45.9565	108.115	-1.2342	0.004006	0.034071	down	sp|Q84MA9|Y1063_ARATH Inactive leucine-rich repeat receptor-like serine/threonine-protein kinase At1g60630 OS=Arabidopsis thaliana GN=At1g60630 PE=2 SV=1//1.04595e-173
Cla007500	130.663	380.023	-1.5402	1.1406e-07	3.9193e-06	down	sp|Q38909|XTH28_ARATH Probable xyloglucan endotransglucosylase/hydrolase protein 28 OS=Arabidopsis thaliana GN=XTH28 PE=2 SV=1//9.83796e-116
Cla007501	27.309	88.5196	-1.6966	0.00057821	0.0071208	down	sp|Q8LDS2|XTH27_ARATH Probable xyloglucan endotransglucosylase/hydrolase protein 27 OS=Arabidopsis thaliana GN=XTH27 PE=2 SV=2//6.79912e-27
Cla007531	648.929	1065.35	-0.71519	0.0018526	0.018643	down	sp|Q8GY55|TIF4B_ARATH Protein TIFY 4B OS=Arabidopsis thaliana GN=TIFY4B PE=1 SV=1//7.78531e-82
Cla007589	1064.37	1763.63	-0.72855	0.00070474	0.0083494	down	sp|P13744|11SB_CUCMA 11S globulin subunit beta OS=Cucurbita maxima PE=1 SV=1//0
Cla007630	2327.83	8529.03	-1.8734	2.8636e-19	5.9877e-17	down	sp|Q05046|CH62_CUCMA Chaperonin CPN60-2, mitochondrial OS=Cucurbita maxima GN=CPN60-2 PE=1 SV=1//0
Cla007652	68.85	143.733	-1.0619	0.0051447	0.040939	down	sp|Q5PQL2|RCD1_RAT Cell differentiation protein RCD1 homolog OS=Rattus norvegicus GN=Rqcd1 PE=1 SV=1//1.43446e-86
Cla007666	42.7715	163.037	-1.9305	2.281e-06	6.0178e-05	down	-//-
Cla007689	120.475	443.26	-1.8794	1.3931e-10	7.9137e-09	down	-//-
Cla007711	213.377	370.589	-0.79642	0.0031098	0.028077	down	sp|Q9FL53|FLA21_ARATH Fasciclin-like arabinogalactan protein 21 OS=Arabidopsis thaliana GN=FLA21 PE=2 SV=1//2.94714e-87
Cla007718	3259.08	4993.3	-0.61553	0.0057627	0.044734	down	sp|Q9SUC9|UGPI7_ARATH Uncharacterized GPI-anchored protein At4g28100 OS=Arabidopsis thaliana GN=At4g28100 PE=1 SV=1//2.62429e-117
Cla007727	4108.64	6998.22	-0.76833	0.00010551	0.0017082	down	sp|P59015|VPS18_DANRE Vacuolar protein sorting-associated protein 18 homolog OS=Danio rerio GN=vps18 PE=2 SV=2//8.33303e-151
Cla007735	9.16283	50.0927	-2.4507	0.0003565	0.0047895	down	-//-
Cla007777	565.384	3456.88	-2.6122	4.209e-07	1.2723e-05	down	sp|Q93X23|MYRS_QUEIL Myrcene synthase, chloroplastic OS=Quercus ilex PE=1 SV=1//8.38425e-33
Cla007779	62.0952	631.326	-3.3458	6.9126e-08	2.4525e-06	down	sp|Q93X23|MYRS_QUEIL Myrcene synthase, chloroplastic OS=Quercus ilex PE=1 SV=1//0
Cla007788	947.012	1631.32	-0.78459	0.000413	0.0054371	down	-//-
Cla007790	5065.48	9743.94	-0.94381	0.00054157	0.0067671	down	sp|Q39117|TGT2_ARATH Trihelix transcription factor GT-2 OS=Arabidopsis thaliana GN=GT-2 PE=2 SV=1//7.52018e-17
Cla007824	107.352	224.225	-1.0626	0.0010098	0.011246	down	-//-
Cla007867	13.2706	95.154	-2.842	0.0028041	0.025923	down	sp|O23090|BH014_ARATH Transcription factor bHLH14 OS=Arabidopsis thaliana GN=BHLH14 PE=2 SV=1//8.00681e-41
Cla007956	466.193	861.611	-0.88611	0.00017395	0.0026421	down	-//-
Cla007979	112.276	232.849	-1.0523	0.0042593	0.035689	down	sp|Q940D0|ARR1_ARATH Two-component response regulator ARR1 OS=Arabidopsis thaliana GN=ARR1 PE=1 SV=2//3.15366e-12
Cla008025	176.805	345.459	-0.96636	0.00076825	0.0090051	down	sp|Q9FN03|UVR8_ARATH Ultraviolet-B receptor UVR8 OS=Arabidopsis thaliana GN=UVR8 PE=1 SV=1//7.86327e-08
Cla008033	639.231	1200.84	-0.90964	8.594e-05	0.0014364	down	sp|Q1PFB9|AGC17_ARATH Serine/threonine-protein kinase AGC1-7 OS=Arabidopsis thaliana GN=AGC1-7 PE=1 SV=1//0
Cla008095	572.981	1019.7	-0.83158	0.00038757	0.0051505	down	sp|F4KEW8|NET4A_ARATH Protein NETWORKED 4A OS=Arabidopsis thaliana GN=NET4A PE=2 SV=1//9.01056e-106
Cla008098	403.366	651.266	-0.69116	0.0038134	0.032816	down	-//-
Cla008124	2988.3	4473.34	-0.58203	0.0043899	0.036484	down	sp|P13284|GILT_HUMAN Gamma-interferon-inducible lysosomal thiol reductase OS=Homo sapiens GN=IFI30 PE=1 SV=3//1.04973e-25
Cla008143	107.247	232.666	-1.1173	0.00050109	0.0063623	down	sp|A1L209|AT7L3_DANRE Ataxin-7-like protein 3 OS=Danio rerio GN=atxn7l3 PE=2 SV=1//1.77403e-09
Cla008157	163.231	1555.78	-3.2527	2.2049e-08	8.5818e-07	down	sp|P48626|FAD3E_TOBAC Omega-3 fatty acid desaturase, endoplasmic reticulum OS=Nicotiana tabacum GN=FAD3 PE=2 SV=1//4.69973e-156
Cla008160	253.831	422.555	-0.73527	0.0060933	0.046929	down	-//-
Cla008188	14780	36319.2	-1.2971	2.4048e-10	1.3093e-08	down	sp|Q84TH4|SR45A_ARATH Serine/arginine-rich splicing factor SR45a OS=Arabidopsis thaliana GN=SR45A PE=1 SV=1//2.89555e-34
Cla008197	555.418	2102.43	-1.9204	1.1804e-17	2.0002e-15	down	sp|P27880|HSP12_MEDSA 18.2 kDa class I heat shock protein OS=Medicago sativa GN=HSP18.2 PE=2 SV=1//8.65182e-62
Cla008198	3348.6	7789.03	-1.2179	4.7317e-09	2.053e-07	down	sp|P04793|HSP13_SOYBN 17.5 kDa class I heat shock protein OS=Glycine max GN=HSP17.5-M PE=3 SV=1//6.4954e-23
Cla008226	527.816	2587.36	-2.2934	9.6876e-06	0.00021786	down	sp|Q09893|YAI5_SCHPO Uncharacterized protein C24B11.05 OS=Schizosaccharomyces pombe (strain 972 / ATCC 24843) GN=SPAC24B11.05 PE=3 SV=1//4.70827e-16
Cla008239	2667.9	8528.9	-1.6767	0.00044591	0.0057926	down	sp|P52409|E13B_WHEAT Glucan endo-1,3-beta-glucosidase OS=Triticum aestivum GN=GLC1 PE=2 SV=1//6.43427e-161
Cla008246	534.613	854.098	-0.67591	0.0039899	0.03397	down	sp|Q9SNC3|FLA4_ARATH Fasciclin-like arabinogalactan protein 4 OS=Arabidopsis thaliana GN=FLA4 PE=1 SV=1//6.09897e-127
Cla008276	0	11.4568	#NAME?	0.0043082	0.036003	down	-//-
Cla008287	728.201	1182.21	-0.69908	0.0017432	0.01778	down	-//-
Cla008300	3035.03	7674.44	-1.3383	0.00024201	0.0034671	down	sp|Q8LCU7|MECR_ARATH Probable trans-2-enoyl-CoA reductase, mitochondrial OS=Arabidopsis thaliana GN=At3g45770 PE=2 SV=1//0
Cla008309	497.794	824.859	-0.7286	0.0022042	0.021468	down	sp|Q9FJP6|PUB38_ARATH U-box domain-containing protein 38 OS=Arabidopsis thaliana GN=PUB38 PE=1 SV=1//3.3912e-153
Cla008325	406.37	881.079	-1.1165	2.5506e-06	6.6224e-05	down	sp|Q9LV16|B3GTJ_ARATH Probable beta-1,3-galactosyltransferase 19 OS=Arabidopsis thaliana GN=B3GALT19 PE=2 SV=2//0
Cla008356	50.2959	900.737	-4.1626	9.9913e-07	2.8014e-05	down	sp|F1SWA0|ZERSY_ZINZE Zerumbone synthase OS=Zingiber zerumbet GN=ZSD1 PE=1 SV=1//1.24672e-93
Cla008397	2499.66	5556.8	-1.1525	3.1274e-07	9.7726e-06	down	sp|Q766C2|NEP2_NEPGR Aspartic proteinase nepenthesin-2 OS=Nepenthes gracilis GN=nep2 PE=1 SV=1//1.61557e-36
Cla008411	888.805	1548.94	-0.80134	0.0023273	0.022379	down	sp|Q8W103|CHR24_ARATH Protein CHROMATIN REMODELING 24 OS=Arabidopsis thaliana GN=CHR24 PE=2 SV=1//8.85892e-12
Cla008449	109.987	279.457	-1.3453	3.091e-05	0.00059797	down	sp|Q6Q4D0|TONS_ARATH Protein TONSOKU OS=Arabidopsis thaliana GN=TSK PE=1 SV=2//0
Cla008454	1752.78	4972.89	-1.5044	5.5772e-13	4.4926e-11	down	sp|Q6NQG7|ATL78_ARATH RING-H2 finger protein ATL78 OS=Arabidopsis thaliana GN=ATL78 PE=2 SV=1//1.79143e-54
Cla008485	1050.79	2015.05	-0.93934	9.4999e-06	0.00021413	down	sp|Q9XIK4|U202A_ARATH UPF0202 protein At1g10490 OS=Arabidopsis thaliana GN=At1g10490 PE=2 SV=2//1.94433e-70
Cla008503	797.507	1337.54	-0.74601	0.0044174	0.036635	down	-//-
Cla008511	21.0142	72.3157	-1.7829	0.0010684	0.011756	down	sp|Q9S7G2|GATL2_ARATH Probable galacturonosyltransferase-like 2 OS=Arabidopsis thaliana GN=GATL2 PE=2 SV=1//0
Cla008553	1216.69	1804.39	-0.56854	0.0064546	0.048983	down	sp|Q42438|CDPK8_ARATH Calcium-dependent protein kinase 8 OS=Arabidopsis thaliana GN=CPK8 PE=1 SV=1//0
Cla008563	79.0601	212.381	-1.4256	5.7311e-05	0.001013	down	sp|Q9LPS1|HXK3_ARATH Hexokinase-3 OS=Arabidopsis thaliana GN=At1g50460 PE=1 SV=1//0
Cla008576	4420.24	7081.98	-0.68003	0.00084176	0.0096753	down	sp|P29836|ICP0_BHV1K E3 ubiquitin-protein ligase ICP0 OS=Bovine herpesvirus 1.2 (strain K22) GN=BICP0 PE=3 SV=1//5.31299e-06
Cla008578	992.302	1687.25	-0.76582	0.00048838	0.0062414	down	-//-
Cla008580	1074.48	2071.13	-0.94678	1.085e-05	0.00024014	down	sp|Q8RWL5|CLT3_ARATH Protein CLT3, chloroplastic OS=Arabidopsis thaliana GN=CLT3 PE=2 SV=1//1.898e-133
Cla008602	343.726	1164.4	-1.7603	0.003821	0.032853	down	sp|O48790|CCB14_ARATH Cyclin-B1-4 OS=Arabidopsis thaliana GN=CYCB1-4 PE=2 SV=1//2.28371e-134
Cla008687	605.954	1030.81	-0.7665	0.00069534	0.008253	down	sp|Q9S9K4|ASPL2_ARATH Aspartic proteinase-like protein 2 OS=Arabidopsis thaliana GN=At1g65240 PE=1 SV=2//4.91144e-84
Cla008692	122.11	317.364	-1.378	0.001288	0.013842	down	sp|F4IXE7|IDM1_ARATH Increased DNA methylation 1 OS=Arabidopsis thaliana GN=IDM1 PE=1 SV=1//3.30375e-40
Cla008722	11.7485	43.7338	-1.8963	0.0055113	0.043305	down	sp|Q54P70|Y4757_DICDI OTU domain-containing protein DDB_G0284757 OS=Dictyostelium discoideum GN=DDB_G0284757 PE=3 SV=2//2.01223e-13
Cla008735	3.45274	31.3284	-3.1817	0.0048166	0.038975	down	sp|Q8RXL8|Y1689_ARATH Uncharacterized membrane protein At1g06890 OS=Arabidopsis thaliana GN=At1g06890 PE=1 SV=1//6.58481e-144
Cla008739	894.618	2072.93	-1.2123	0.00015551	0.0023917	down	sp|Q9SE43|REV_ARATH Homeobox-leucine zipper protein REVOLUTA OS=Arabidopsis thaliana GN=REV PE=1 SV=2//0
Cla008787	739.496	1114.32	-0.59155	0.0063408	0.048399	down	sp|O82302|P2C29_ARATH Protein phosphatase 2C 29 OS=Arabidopsis thaliana GN=PLL1 PE=1 SV=2//0
Cla008852	702.711	1169.63	-0.73505	0.0010661	0.011753	down	-//-
Cla008863	187.938	331.162	-0.81728	0.0029662	0.027081	down	sp|Q9FHJ6|RFA1C_ARATH Replication protein A 70 kDa DNA-binding subunit C OS=Arabidopsis thaliana GN=RPA1C PE=3 SV=1//0
Cla008868	0	21.0511	#NAME?	0.00037948	0.0050623	down	-//-
Cla008913	26.501	88.5096	-1.7398	0.00060186	0.0073567	down	sp|Q5XF11|FB248_ARATH F-box protein At4g35930 OS=Arabidopsis thaliana GN=At4g35930 PE=2 SV=1//1.84098e-88
Cla008915	3119.31	5369.22	-0.78349	0.00016109	0.0024698	down	sp|Q39255|SKP1A_ARATH SKP1-like protein 1A OS=Arabidopsis thaliana GN=SKP1A PE=1 SV=1//4.26335e-82
Cla008931	80.0384	189.666	-1.2447	0.0004865	0.0062213	down	-//-
Cla008973	2491.97	4342.78	-0.80133	9.498e-05	0.0015635	down	sp|H9BFQ2|TPRL3_ERYCB Tropinone reductase-like 3 OS=Erythroxylum coca PE=2 SV=1//2.83484e-117
Cla009009	707.002	1109.93	-0.65068	0.0034134	0.030101	down	sp|O65373|BAG5_ARATH BAG family molecular chaperone regulator 5, mitochondrial OS=Arabidopsis thaliana GN=BAG5 PE=1 SV=1//3.03718e-75
Cla009034	420.528	1184.53	-1.494	2.09e-10	1.1443e-08	down	sp|P54928|IMP3_SOLLC Inositol monophosphatase 3 OS=Solanum lycopersicum GN=IMP3 PE=1 SV=1//1.07955e-158
Cla009071	21.4592	94.2221	-2.1345	3.2735e-05	0.00062894	down	sp|Q8LDF9|HMGB7_ARATH High mobility group B protein 7 OS=Arabidopsis thaliana GN=HMGB7 PE=1 SV=1//2.81076e-43
Cla009091	1512.91	2294.93	-0.60112	0.0036763	0.031929	down	sp|Q9SSE9|JMJ25_ARATH Lysine-specific demethylase JMJ25 OS=Arabidopsis thaliana GN=JMJ25 PE=1 SV=1//9.35119e-58
Cla009101	654.321	1128.02	-0.78572	0.00049694	0.006326	down	sp|O80438|MAK3_ARATH N-alpha-acetyltransferase MAK3 OS=Arabidopsis thaliana GN=MAK3 PE=2 SV=1//4.15561e-102
Cla009144	2445.61	7273.9	-1.5725	2.286e-14	2.2924e-12	down	sp|Q9FHQ3|HS157_ARATH 15.7 kDa heat shock protein, peroxisomal OS=Arabidopsis thaliana GN=HSP15.7 PE=2 SV=1//1.07587e-45
Cla009229	3091.02	13041.3	-2.0769	4.2174e-07	1.2723e-05	down	sp|P22242|DRPE_CRAPL Desiccation-related protein PCC13-62 OS=Craterostigma plantagineum PE=2 SV=1//7.99917e-123
Cla009230	187.185	366.603	-0.96975	0.00042972	0.0056233	down	sp|Q9M302|PP270_ARATH Pentatricopeptide repeat-containing protein At3g48810 OS=Arabidopsis thaliana GN=At3g48810 PE=2 SV=1//6.70915e-30
Cla009253	329.714	681.568	-1.0476	0.00067792	0.0080804	down	sp|Q0WMZ5|OP162_ARATH Outer envelope pore protein 16-2, chloroplastic OS=Arabidopsis thaliana GN=OEP162 PE=2 SV=1//9.59381e-55
Cla009295	10.4701	57.6279	-2.4605	0.00013751	0.0021451	down	-//-
Cla009298	323.03	638.111	-0.98214	9.575e-05	0.0015709	down	sp|Q6ZQK0|CNDD3_MOUSE Condensin-2 complex subunit D3 OS=Mus musculus GN=Ncapd3 PE=1 SV=3//2.46149e-77
Cla009322	729.826	1127.12	-0.62701	0.0042736	0.035774	down	sp|Q8VY89|APC7_ARATH Anaphase-promoting complex subunit 7 OS=Arabidopsis thaliana GN=APC7 PE=2 SV=1//0
Cla009331	841.929	1404.07	-0.73784	0.00087449	0.0099641	down	sp|P19515|LIP_RHIMI Lipase OS=Rhizomucor miehei PE=1 SV=2//7.94248e-32
[truncated: 613 more rows]

## Sheet: O_20vsW_20.DEG
Gene_id	readcount_O_2	readcount_W_2	log2FoldChange	pval	padj	up_down	Blast swiss prot
Cla000011	351.443	233.678	0.58877	0.012966	0.038444	up	sp|P24465|C71A1_PERAE Cytochrome P450 71A1 OS=Persea americana GN=CYP71A1 PE=1 SV=2//8.25294e-64
Cla000027	565.117	337.254	0.74471	0.00031392	0.0015413	up	sp|Q9LTR2|TGD2_ARATH Protein TRIGALACTOSYLDIACYLGLYCEROL 2, chloroplastic OS=Arabidopsis thaliana GN=TGD2 PE=2 SV=1//2.21264e-63
Cla000035	180.695	96.8478	0.89977	0.0036622	0.013178	up	-//-
Cla000042	72.7182	2.1842	5.0571	0.0098026	0.030448	up	sp|Q9LY87|RGLG2_ARATH E3 ubiquitin-protein ligase RGLG2 OS=Arabidopsis thaliana GN=RGLG2 PE=1 SV=1//6.24406e-09
Cla000045	380.527	121.488	1.6472	0.0015234	0.0061102	up	sp|Q8GXT7|P4H12_ARATH Probable prolyl 4-hydroxylase 12 OS=Arabidopsis thaliana GN=P4H12 PE=2 SV=1//2.50385e-76
Cla000111	26.7533	0.402166	6.0558	4.1077e-06	3.1616e-05	up	sp|Q8S9N6|ATB17_ARATH Homeobox-leucine zipper protein ATHB-17 OS=Arabidopsis thaliana GN=ATHB-17 PE=2 SV=1//9.72675e-73
Cla000129	3183.76	1019.27	1.6432	3.6899e-24	2.6563e-22	up	sp|Q6NPF9|TRXY1_ARATH Thioredoxin Y1, chloroplastic OS=Arabidopsis thaliana GN=At1g76760 PE=2 SV=1//3.86818e-50
Cla000134	1430.29	537.8	1.4112	6.1484e-08	6.798e-07	up	-//-
Cla000159	988.001	121.67	3.0215	5.1974e-36	8.6983e-34	up	-//-
Cla000165	293.097	153.534	0.93282	0.00025519	0.0012812	up	-//-
Cla000224	18.9788	0	Inf	0.00023898	0.0012116	up	sp|P24465|C71A1_PERAE Cytochrome P450 71A1 OS=Persea americana GN=CYP71A1 PE=1 SV=2//2.745e-139
Cla000226	110.243	53.2682	1.0493	0.0050133	0.017243	up	sp|P24465|C71A1_PERAE Cytochrome P450 71A1 OS=Persea americana GN=CYP71A1 PE=1 SV=2//1.89748e-159
Cla000227	12761.6	8339.79	0.61372	2.1381e-05	0.00014087	up	sp|P51567|AFC2_ARATH Serine/threonine-protein kinase AFC2 OS=Arabidopsis thaliana GN=AFC2 PE=1 SV=1//0
Cla000228	19164	1571.78	3.6079	3.8622e-14	1.0976e-12	up	sp|P24465|C71A1_PERAE Cytochrome P450 71A1 OS=Persea americana GN=CYP71A1 PE=1 SV=2//1.42306e-151
Cla000266	1666.05	900.527	0.88759	1.2185e-07	1.2786e-06	up	sp|Q5XET4|PP142_ARATH Pentatricopeptide repeat-containing protein At2g01860 OS=Arabidopsis thaliana GN=EMB975 PE=2 SV=1//4.18303e-154
Cla000304	5069.35	3751.86	0.4342	0.0033474	0.012195	up	sp|Q689G6|PRR95_ORYSJ Two-component response regulator-like PRR95 OS=Oryza sativa subsp. japonica GN=PRR95 PE=2 SV=1//3.73561e-96
Cla000305	446.973	230.42	0.95592	0.0041643	0.014718	up	sp|Q9SJ52|YLS9_ARATH Protein YLS9 OS=Arabidopsis thaliana GN=YLS9 PE=2 SV=1//1.82432e-10
Cla000311	12542.6	7829.85	0.67978	2.7335e-06	2.1829e-05	up	-//-
Cla000331	1152.38	761.957	0.59684	0.00079831	0.0035033	up	sp|Q5ZHP7|EAF2_CHICK ELL-associated factor 2 OS=Gallus gallus GN=EAF2 PE=2 SV=1//3.48652e-07
Cla000333	130.833	15.2628	3.0996	5.8732e-10	9.2149e-09	up	sp|Q94CD1|HHT1_ARATH Omega-hydroxypalmitate O-feruloyl transferase OS=Arabidopsis thaliana GN=HHT1 PE=1 SV=1//1.0735e-60
Cla000354	1331.07	1009.3	0.39922	0.014894	0.043194	up	sp|Q9LVY0|PRFB1_ARATH Peptide chain release factor PrfB1, chloroplastic OS=Arabidopsis thaliana GN=PRFB1 PE=2 SV=1//0
Cla000366	2120.13	1321.59	0.68188	2.2464e-05	0.00014721	up	sp|Q93YZ7|ILVH2_ARATH Acetolactate synthase small subunit 2, chloroplastic OS=Arabidopsis thaliana GN=At2g31810 PE=1 SV=1//1.08516e-39
Cla000390	293.076	81.4336	1.8476	2.6886e-11	5.1629e-10	up	sp|Q9ZQ89|UPS2_ARATH Ureide permease 2 OS=Arabidopsis thaliana GN=UPS2 PE=1 SV=2//0
Cla000391	300.366	139.358	1.1079	0.0033491	0.012199	up	sp|Q9ZQ89|UPS2_ARATH Ureide permease 2 OS=Arabidopsis thaliana GN=UPS2 PE=1 SV=2//1.2331e-177
Cla000394	1078.55	638.108	0.75722	6.7839e-05	0.00039452	up	sp|P49132|TPT_FLATR Triose phosphate/phosphate translocator, chloroplastic OS=Flaveria trinervia GN=TPT PE=2 SV=1//8.24869e-148
Cla000443	150.442	31.7927	2.2424	1.3502e-08	1.6992e-07	up	sp|Q9M2C0|VITH4_ARATH Vacuolar iron transporter homolog 4 OS=Arabidopsis thaliana GN=At3g43660 PE=2 SV=1//7.96973e-75
Cla000465	1522.24	616.793	1.3033	4.4496e-14	1.2487e-12	up	sp|Q02764|RK24_TOBAC 50S ribosomal protein L24, chloroplastic OS=Nicotiana tabacum GN=RPL24 PE=1 SV=1//3.50946e-83
Cla000480	65.7801	28.0134	1.2315	0.01327	0.039202	up	sp|Q9LMA1|FMO1_ARATH Probable flavin-containing monooxygenase 1 OS=Arabidopsis thaliana GN=FMO1 PE=2 SV=1//1.01015e-128
Cla000490	3592.11	975.598	1.8805	2.3142e-07	2.3151e-06	up	-//-
Cla000513	1608.69	578.327	1.4759	1.7995e-17	7.4811e-16	up	sp|P22686|CB2_CHLMO Chlorophyll a-b binding protein of LHCII type I, chloroplastic OS=Chlamydomonas moewusii PE=2 SV=1//5.5702e-61
Cla000555	4650.88	3518	0.40275	0.007953	0.025404	up	sp|Q7DLR9|PSB4_ARATH Proteasome subunit beta type-4 OS=Arabidopsis thaliana GN=PBG1 PE=1 SV=2//6.30436e-148
Cla000566	6066.88	4549.3	0.41531	0.0050192	0.017258	up	sp|Q71N54|LCAT4_ARATH Lecithin-cholesterol acyltransferase-like 4 OS=Arabidopsis thaliana GN=LCAT4 PE=1 SV=1//0
Cla000582	324.528	160.422	1.0165	0.0061689	0.020536	up	sp|Q9SAK5|APL_ARATH Myb family transcription factor APL OS=Arabidopsis thaliana GN=APL PE=2 SV=2//1.75271e-49
Cla000655	1356.56	842.714	0.68684	4.7578e-05	0.00028604	up	sp|Q93VK5|LUT5_ARATH Protein LUTEIN DEFICIENT 5, chloroplastic OS=Arabidopsis thaliana GN=CYP97A3 PE=1 SV=1//0
Cla000664	44298.5	10968.2	2.0139	1.4918e-11	2.9845e-10	up	-//-
Cla000676	440.843	86.5531	2.3486	1.3939e-16	5.3624e-15	up	sp|P27484|GRP2_NICSY Glycine-rich protein 2 OS=Nicotiana sylvestris GN=GRP-2 PE=2 SV=1//3.02514e-23
Cla000689	25.1192	5.06724	2.3095	0.0092759	0.029033	up	-//-
Cla000690	1424.02	897.759	0.66557	8.0205e-05	0.0004576	up	-//-
Cla000694	19.0845	0.682628	4.8052	0.0005527	0.0025298	up	sp|Q5Q0H2|FLA19_ARATH Fasciclin-like arabinogalactan protein 19 OS=Arabidopsis thaliana GN=FLA19 PE=2 SV=2//2.57562e-27
Cla000707	117.433	18.9037	2.6351	0.00092458	0.0039705	up	sp|Q9FZ36|M3K2_ARATH Mitogen-activated protein kinase kinase kinase 2 OS=Arabidopsis thaliana GN=ANP2 PE=2 SV=1//2.52528e-43
Cla000709	20544.8	8588.43	1.2583	8.6789e-18	3.7186e-16	up	sp|O59952|LIP_THELA Lipase OS=Thermomyces lanuginosus GN=LIP PE=1 SV=1//5.77137e-10
Cla000710	328.89	126.864	1.3743	6.6603e-08	7.3185e-07	up	-//-
Cla000745	4858.93	2054.49	1.2419	8.5737e-16	2.9609e-14	up	sp|Q05091|PGIP_PYRCO Polygalacturonase inhibitor OS=Pyrus communis GN=PGIP PE=1 SV=1//3.75264e-156
Cla000754	1158.35	659.899	0.81175	4.2821e-06	3.2869e-05	up	sp|O23657|RABC1_ARATH Ras-related protein RABC1 OS=Arabidopsis thaliana GN=RABC1 PE=1 SV=1//4.71499e-125
Cla000761	452.306	290.992	0.63632	0.0027378	0.010204	up	sp|F1RAX8|COQ6_DANRE Ubiquinone biosynthesis monooxygenase COQ6, mitochondrial OS=Danio rerio GN=coq6 PE=2 SV=1//3.99904e-81
Cla000763	79.3059	37.6309	1.0755	0.011315	0.034381	up	sp|Q9P7J5|YJNA_SCHPO Uncharacterized AAA domain-containing protein C24B10.10c OS=Schizosaccharomyces pombe (strain 972 / ATCC 24843) GN=SPCC24B10.10c PE=3 SV=1//7.92772e-71
Cla000813	45.2761	14.6643	1.6264	0.0067713	0.022154	up	sp|Q84JS6|KNAT6_ARATH Homeobox protein knotted-1-like 6 OS=Arabidopsis thaliana GN=KNAT6 PE=1 SV=1//6.00962e-41
Cla000814	2032.58	1550.9	0.39021	0.011377	0.034533	up	sp|Q3ED65|MENG_ARATH 2-phytyl-1,4-beta-naphthoquinone methyltransferase, chloroplastic OS=Arabidopsis thaliana GN=MENG PE=1 SV=2//4.43016e-105
Cla000855	2536.92	206.918	3.6159	1.5247e-83	1.357e-80	up	sp|Q9ZWM9|RAV1_ARATH AP2/ERF and B3 domain-containing transcription factor RAV1 OS=Arabidopsis thaliana GN=RAV1 PE=1 SV=1//8.13786e-123
Cla000856	16.5333	1.82017	3.1832	0.0096951	0.030157	up	-//-
Cla000858	11695	7581.06	0.62542	2.0769e-05	0.0001373	up	sp|Q02028|HSP7S_PEA Stromal 70 kDa heat shock-related protein, chloroplastic OS=Pisum sativum GN=HSP70 PE=2 SV=1//0
Cla000871	3154.61	717.421	2.1366	2.1988e-38	4.1801e-36	up	sp|Q6YU51|DXS2_ORYSJ Probable 1-deoxy-D-xylulose-5-phosphate synthase 2, chloroplastic OS=Oryza sativa subsp. japonica GN=Os07g0190000 PE=2 SV=1//0
Cla000885	92.1054	1.68385	5.7735	2.304e-05	0.00015028	up	sp|Q8W3Z1|BAMS_BETPL Beta-amyrin synthase OS=Betula platyphylla GN=OSCBPY PE=1 SV=1//0
Cla000889	2917.78	2049.81	0.50938	0.00093886	0.0040201	up	sp|O04326|NUP35_ARATH Nuclear pore complex protein NUP35 OS=Arabidopsis thaliana GN=NUP35 PE=1 SV=1//1.18308e-158
Cla000893	3285.1	2202.95	0.5765	0.00017716	0.00092508	up	sp|Q9ZU11|ATB15_ARATH Homeobox-leucine zipper protein ATHB-15 OS=Arabidopsis thaliana GN=ATHB-15 PE=1 SV=1//0
Cla000905	2087.87	1246.25	0.74444	3.9115e-06	3.0226e-05	up	sp|Q9LIG0|Y3136_ARATH Clavaminate synthase-like protein At3g21360 OS=Arabidopsis thaliana GN=At3g21360 PE=1 SV=1//9.73341e-180
Cla000921	265.107	95.3025	1.476	9.2842e-08	9.9559e-07	up	-//-
Cla000970	1416.67	1012.63	0.48439	0.0037983	0.013604	up	sp|Q8GYT9|SIS3_ARATH E3 ubiquitin-protein ligase SIS3 OS=Arabidopsis thaliana GN=SIS3 PE=2 SV=2//5.65825e-146
Cla000988	229.014	117.169	0.96684	0.00045125	0.0021296	up	-//-
Cla000996	787.354	177.942	2.1456	1.3237e-15	4.5155e-14	up	sp|Q9FHE4|BRG1_ARATH BOI-related E3 ubiquitin-protein ligase 1 OS=Arabidopsis thaliana GN=BRG1 PE=1 SV=1//5.40401e-52
Cla001006	65.6412	21.9204	1.5823	0.0017754	0.0069905	up	sp|Q9SA16|P2A09_ARATH Protein PHLOEM PROTEIN 2-LIKE A9 OS=Arabidopsis thaliana GN=PP2A9 PE=2 SV=1//6.03132e-40
Cla001007	719.199	68.1064	3.4005	3.7825e-12	8.257e-11	up	sp|Q9SA16|P2A09_ARATH Protein PHLOEM PROTEIN 2-LIKE A9 OS=Arabidopsis thaliana GN=PP2A9 PE=2 SV=1//5.83275e-08
Cla001039	63.4509	14.1023	2.1697	7.9151e-05	0.00045212	up	sp|Q9ZVN2|Y1457_ARATH Acyltransferase-like protein At1g54570, chloroplastic OS=Arabidopsis thaliana GN=At1g54570 PE=2 SV=1//0
Cla001042	288.27	188.048	0.61632	0.013145	0.038895	up	sp|Q9LW20|SKL1_ARATH Probable inactive shikimate kinase like 1, chloroplastic OS=Arabidopsis thaliana GN=SKL1 PE=2 SV=1//2.00336e-88
Cla001045	30.4603	6.22722	2.2903	0.0054254	0.018395	up	sp|Q8VZ13|Y1816_ARATH Uncharacterized protein At1g08160 OS=Arabidopsis thaliana GN=At1g08160 PE=2 SV=1//1.5558e-31
Cla001056	279.22	150.252	0.89401	0.00049134	0.0022896	up	sp|Q058N4|MRS2B_ARATH Magnesium transporter MRS2-11, chloroplastic OS=Arabidopsis thaliana GN=MRS2-11 PE=2 SV=1//0
Cla001057	11048.6	6873.68	0.6847	2.4138e-06	1.9573e-05	up	sp|Q9SJK3|AGO5_ARATH Protein argonaute 5 OS=Arabidopsis thaliana GN=AGO5 PE=1 SV=2//0
Cla001061	20.5917	1.12293	4.1967	0.00060387	0.0027384	up	-//-
Cla001067	1982.7	817.844	1.2776	4.6651e-05	0.00028096	up	sp|P23923|HBP1B_WHEAT Transcription factor HBP-1b(c38) OS=Triticum aestivum PE=2 SV=1//1.91977e-100
Cla001103	2195.78	1674	0.39143	0.013048	0.038653	up	sp|Q8VZT8|RT11_ARATH Probable ribosomal protein S11, mitochondrial OS=Arabidopsis thaliana GN=NFD3 PE=2 SV=1//1.45883e-62
Cla001104	813.501	447.003	0.86386	0.0007351	0.003261	up	-//-
Cla001140	254.148	110.596	1.2004	1.1895e-05	8.3124e-05	up	sp|Q8W4E1|RH47_ARATH DEAD-box ATP-dependent RNA helicase 47, mitochondrial OS=Arabidopsis thaliana GN=RH47 PE=1 SV=2//0
Cla001160	264.298	70.3769	1.909	3.6302e-11	6.848e-10	up	sp|Q9LDH3|PT112_ARATH Probable sugar phosphate/phosphate translocator At1g12500 OS=Arabidopsis thaliana GN=At1g12500 PE=1 SV=1//4.22649e-176
Cla001196	2937.63	1656.84	0.82621	1.0415e-07	1.1072e-06	up	sp|Q8GX93|CLCE_ARATH Chloride channel protein CLC-e OS=Arabidopsis thaliana GN=CLC-E PE=2 SV=2//0
Cla001199	47.0826	9.04862	2.3794	0.0025309	0.0095295	up	-//-
Cla001217	23.6879	0	Inf	3.5132e-06	2.7549e-05	up	sp|Q5E9Q1|PGLT1_BOVIN Protein O-glucosyltransferase 1 OS=Bos taurus GN=POGLUT1 PE=2 SV=1//1.29241e-21
Cla001219	655.062	304.358	1.1059	1.8993e-08	2.3258e-07	up	sp|O80834|AHL9_ARATH AT-hook motif nuclear-localized protein 9 OS=Arabidopsis thaliana GN=AHL9 PE=2 SV=1//4.07658e-77
Cla001227	121.667	25.0568	2.2797	2.3643e-08	2.8302e-07	up	sp|Q9C971|G3OX4_ARATH Gibberellin 3-beta-dioxygenase 4 OS=Arabidopsis thaliana GN=GA3OX4 PE=1 SV=1//4.21488e-33
Cla001241	70.1699	24.593	1.5126	0.0022989	0.0087594	up	sp|O82363|PP203_ARATH Pentatricopeptide repeat-containing protein At2g46050, mitochondrial OS=Arabidopsis thaliana GN=PCMP-E39 PE=3 SV=1//1.36946e-143
Cla001246	43.9162	0	Inf	1.2789e-05	8.8774e-05	up	sp|P11670|PRB1_TOBAC Basic form of pathogenesis-related protein 1 OS=Nicotiana tabacum PE=3 SV=1//3.19311e-62
Cla001251	2960.63	2126.29	0.47757	0.0023703	0.008993	up	sp|O48651|ERG1_PANGI Squalene monooxygenase OS=Panax ginseng PE=2 SV=1//0
Cla001289	1054.17	274.455	1.9415	1.949e-12	4.4069e-11	up	-//-
Cla001290	400.301	139.844	1.5173	6.3548e-07	5.7689e-06	up	sp|Q9C899|F6H2_ARATH Feruloyl CoA ortho-hydroxylase 2 OS=Arabidopsis thaliana GN=F6&apos;H2 PE=1 SV=1//3.2741e-58
Cla001293	417.013	158.446	1.3961	1.8266e-09	2.6318e-08	up	sp|Q9FMF5|RPT3_ARATH Root phototropism protein 3 OS=Arabidopsis thaliana GN=RPT3 PE=1 SV=2//0
Cla001314	995.015	346.41	1.5222	9.8551e-07	8.6419e-06	up	-//-
Cla001317	2278.43	1324.18	0.78294	7.7542e-07	6.9362e-06	up	sp|Q9SRY4|LPA1_ARATH Protein LOW PSII ACCUMULATION 1, chloroplastic OS=Arabidopsis thaliana GN=LPA1 PE=1 SV=1//0
Cla001320	44.082	2.5028	4.1386	4.8241e-07	4.4853e-06	up	sp|Q8W4G6|CRK15_ARATH Cysteine-rich receptor-like protein kinase 15 OS=Arabidopsis thaliana GN=CRK15 PE=2 SV=2//4.65661e-59
Cla001334	1575.49	579.891	1.4419	9.2496e-07	8.1547e-06	up	sp|O81906|B120_ARATH G-type lectin S-receptor-like serine/threonine-protein kinase B120 OS=Arabidopsis thaliana GN=B120 PE=2 SV=1//0
Cla001335	306.971	43.1311	2.8313	2.5654e-09	3.5958e-08	up	sp|Q9LJB7|BBX32_ARATH B-box zinc finger protein 32 OS=Arabidopsis thaliana GN=BBX32 PE=1 SV=1//1.23698e-09
Cla001336	522.593	241.767	1.1121	2.1885e-07	2.1983e-06	up	-//-
Cla001337	5403.32	3324.35	0.70077	3.5818e-06	2.7976e-05	up	-//-
Cla001338	135.637	10.0734	3.7511	7.1922e-16	2.5103e-14	up	sp|Q9M0Y3|ENT3_ARATH Equilibrative nucleotide transporter 3 OS=Arabidopsis thaliana GN=ENT3 PE=1 SV=1//5.40929e-39
Cla001343	458.323	160.524	1.5136	0.0013612	0.0055552	up	-//-
Cla001349	225.853	89.8336	1.3301	4.4541e-06	3.4029e-05	up	sp|O65416|SKI27_ARATH F-box protein SKIP27 OS=Arabidopsis thaliana GN=SKIP27 PE=1 SV=2//1.91518e-34
Cla001353	131.253	55.1443	1.2511	0.0059041	0.019796	up	-//-
Cla001357	27.9675	6.95637	2.0073	0.012606	0.037518	up	sp|Q53FA7|QORX_HUMAN Quinone oxidoreductase PIG3 OS=Homo sapiens GN=TP53I3 PE=1 SV=2//1.18129e-31
Cla001407	2050.03	1370.23	0.58123	0.00029337	0.001451	up	sp|Q9C5U2|AHK2_ARATH Histidine kinase 2 OS=Arabidopsis thaliana GN=AHK2 PE=1 SV=1//0
Cla001409	1796.68	926.65	0.95524	5.0936e-06	3.8494e-05	up	sp|Q9LDL7|PAT1_ARATH Scarecrow-like transcription factor PAT1 OS=Arabidopsis thaliana GN=PAT1 PE=2 SV=1//0
Cla001440	4205.26	189.94	4.4686	3.7575e-05	0.00023232	up	sp|Q84WT8|CYT4_ARATH Cysteine proteinase inhibitor 4 OS=Arabidopsis thaliana GN=CYS4 PE=3 SV=2//1.33242e-08
Cla001442	950.548	66.8123	3.8306	0.0043457	0.015288	up	sp|Q10J94|CYT8_ORYSJ Cysteine proteinase inhibitor 8 OS=Oryza sativa subsp. japonica GN=Os03g0429000 PE=2 SV=1//6.01807e-07
Cla001448	2080.74	1500.7	0.47146	0.0029278	0.010825	up	-//-
Cla001455	1809.34	1338.88	0.43443	0.0094396	0.029484	up	sp|B9HBA8|ACCC1_POPTR Biotin carboxylase 1, chloroplastic OS=Populus trichocarpa GN=POPTRDRAFT_831870 PE=2 SV=1//0
Cla001456	504.551	211.235	1.2562	1.1536e-08	1.4678e-07	up	sp|Q5ZJ08|SYYC_CHICK Tyrosine--tRNA ligase, cytoplasmic OS=Gallus gallus GN=YARS PE=2 SV=1//2.33961e-15
Cla001457	423.431	168.507	1.3293	1.4435e-08	1.8096e-07	up	sp|Q29465|SYYC_BOVIN Tyrosine--tRNA ligase, cytoplasmic OS=Bos taurus GN=YARS PE=2 SV=4//6.67646e-12
Cla001459	870.198	586.916	0.56819	0.0013557	0.0055408	up	sp|Q9M2Y4|PP276_ARATH Pentatricopeptide repeat-containing protein At3g49740 OS=Arabidopsis thaliana GN=PCMP-E84 PE=2 SV=1//0
Cla001491	95.2567	33.4771	1.5086	0.00044638	0.0021097	up	sp|Q9XIC7|SERK2_ARATH Somatic embryogenesis receptor kinase 2 OS=Arabidopsis thaliana GN=SERK2 PE=1 SV=1//6.88081e-53
Cla001502	1846.28	670.368	1.4616	1.1011e-17	4.6668e-16	up	sp|Q9ASS6|PNSL5_ARATH Photosynthetic NDH subunit of lumenal location 5, chloroplastic OS=Arabidopsis thaliana GN=PNSL5 PE=1 SV=1//9.34071e-100
Cla001503	1146.82	314.25	1.8677	5.2854e-10	8.3598e-09	up	sp|Q8LJW3|ACR4_ARATH ACT domain-containing protein ACR4 OS=Arabidopsis thaliana GN=ACR4 PE=2 SV=1//6.50861e-179
Cla001504	725.2	140.054	2.3724	2.2346e-27	2.1138e-25	up	sp|Q8GUH1|PUB33_ARATH U-box domain-containing protein 33 OS=Arabidopsis thaliana GN=PUB33 PE=2 SV=2//9.41961e-11
Cla001505	565.355	91.4219	2.6285	1.2324e-10	2.1393e-09	up	sp|Q8VY13|FRO8_ARATH Ferric reduction oxidase 8, mitochondrial OS=Arabidopsis thaliana GN=FRO8 PE=2 SV=1//0
Cla001512	507.231	357.553	0.50449	0.012452	0.037134	up	sp|O23144|PPI1_ARATH Proton pump-interactor 1 OS=Arabidopsis thaliana GN=PPI1 PE=1 SV=2//1.01221e-23
Cla001590	132.917	75.2659	0.82046	0.015989	0.045832	up	-//-
Cla001591	422.371	290.731	0.53883	0.014058	0.041134	up	-//-
Cla001593	4815.8	3739.78	0.36482	0.010701	0.032807	up	sp|Q9LVE4|CSCL4_ARATH CSC1-like protein At3g21620 OS=Arabidopsis thaliana GN=At3g21620 PE=2 SV=1//0
Cla001628	1800.6	29.8717	5.9136	1.1474e-13	3.0197e-12	up	sp|P11670|PRB1_TOBAC Basic form of pathogenesis-related protein 1 OS=Nicotiana tabacum PE=3 SV=1//5.86218e-63
Cla001638	416.158	238.15	0.80526	0.00033314	0.0016263	up	sp|Q9LFL5|PP390_ARATH Pentatricopeptide repeat-containing protein At5g16860 OS=Arabidopsis thaliana GN=PCMP-H92 PE=2 SV=1//0
Cla001651	508.808	361.234	0.49419	0.015623	0.044975	up	sp|O80366|ARR9_ARATH Two-component response regulator ARR9 OS=Arabidopsis thaliana GN=ARR9 PE=1 SV=1//6.48852e-84
Cla001674	26.0306	0.728068	5.16	2.0187e-05	0.00013377	up	sp|Q9ZR04|CCD61_ARATH Putative cyclin-D6-1 OS=Arabidopsis thaliana GN=CYCD6-1 PE=3 SV=1//1.08078e-61
Cla001678	712.893	12.4122	5.8439	9.2822e-37	1.6228e-34	up	sp|Q93ZB9|FACR3_ARATH Fatty acyl-CoA reductase 3 OS=Arabidopsis thaliana GN=FAR3 PE=2 SV=1//1.55607e-31
Cla001679	2178.74	51.8028	5.3943	1.5318e-16	5.8696e-15	up	sp|Q9XGY7|FAR_SIMCH Alcohol-forming fatty acyl-CoA reductase OS=Simmondsia chinensis PE=1 SV=1//4.11918e-44
Cla001688	1768.19	816.138	1.1154	1.7612e-11	3.4905e-10	up	sp|Q67Y83|SCP51_ARATH Serine carboxypeptidase-like 51 OS=Arabidopsis thaliana GN=SCPL51 PE=2 SV=2//5.90707e-144
Cla001700	62.2983	1.67654	5.2156	3.2043e-11	6.0797e-10	up	sp|Q9FFA7|RUP2_ARATH WD repeat-containing protein RUP2 OS=Arabidopsis thaliana GN=RUP2 PE=1 SV=1//1.49287e-140
Cla001716	71.5762	26.4523	1.4361	0.0026934	0.010059	up	sp|P46875|ATK3_ARATH Kinesin-3 OS=Arabidopsis thaliana GN=ATK3 PE=2 SV=1//0
Cla001732	610.064	90.7334	2.7493	9.7847e-31	1.205e-28	up	sp|Q8LDW9|XTH9_ARATH Xyloglucan endotransglucosylase/hydrolase protein 9 OS=Arabidopsis thaliana GN=XTH9 PE=2 SV=2//6.24408e-156
Cla001745	1077.65	36.8841	4.8688	1.997e-13	5.0651e-12	up	sp|Q9ZR08|Y4230_ARATH G-type lectin S-receptor-like serine/threonine-protein kinase At4g03230 OS=Arabidopsis thaliana GN=At4g03230 PE=3 SV=3//8.98121e-78
Cla001746	698.625	225.702	1.6301	8.2922e-15	2.553e-13	up	sp|Q9FFR9|CHX18_ARATH Cation/H(+) antiporter 18 OS=Arabidopsis thaliana GN=CHX18 PE=2 SV=1//0
Cla001764	9129.43	3655.82	1.3203	5.4694e-12	1.1666e-10	up	sp|P27522|CB13_SOLLC Chlorophyll a-b binding protein 8, chloroplastic OS=Solanum lycopersicum GN=CAB8 PE=3 SV=1//1.78753e-142
Cla001770	784.349	543.876	0.52822	0.0037534	0.013458	up	-//-
Cla001772	649.868	349.728	0.89391	7.6638e-06	5.5745e-05	up	-//-
Cla001775	714.984	507.091	0.49567	0.0090418	0.028428	up	sp|Q9SZR0|CHMO_ARATH Choline monooxygenase, chloroplastic OS=Arabidopsis thaliana GN=At4g29890 PE=2 SV=2//0
Cla001777	18311.5	8816.84	1.0544	6.3445e-06	4.7068e-05	up	sp|Q54SW1|Y2179_DICDI Putative phosphatidylglycerol/phosphatidylinositol transfer protein DDB_G0282179 OS=Dictyostelium discoideum GN=DDB_G0282179 PE=3 SV=2//3.96262e-07
Cla001787	185.204	6.32593	4.8717	1.7316e-26	1.5137e-24	up	-//-
Cla001789	127.292	60.8879	1.0639	0.002264	0.0086477	up	sp|Q66GI1|CSPLT_ARATH CASP-like protein 5C1 OS=Arabidopsis thaliana GN=At4g37235 PE=2 SV=1//4.83736e-47
Cla001790	29297.1	18160.3	0.68997	0.0016721	0.0066425	up	sp|Q40459|PSBO_TOBAC Oxygen-evolving enhancer protein 1, chloroplastic OS=Nicotiana tabacum GN=PSBO PE=2 SV=1//0
Cla001792	624.244	114.746	2.4437	1.898e-26	1.6518e-24	up	sp|Q94A73|Y5656_ARATH BTB/POZ domain-containing protein At5g66560 OS=Arabidopsis thaliana GN=At5g66560 PE=2 SV=2//0
Cla001814	4368.89	1602.65	1.4468	0.017407	0.049192	up	sp|Q6RYA0|SABP2_TOBAC Salicylic acid-binding protein 2 OS=Nicotiana tabacum GN=SABP2 PE=1 SV=1//8.71212e-99
Cla001818	32.7356	9.77045	1.7444	0.015561	0.044808	up	sp|Q8L9V6|DOF11_ARATH Dof zinc finger protein DOF1.1 OS=Arabidopsis thaliana GN=DOF1.1 PE=1 SV=2//5.07366e-30
Cla001819	126.624	20.0783	2.6568	2.2842e-09	3.2341e-08	up	sp|P29162|ASOL_TOBAC L-ascorbate oxidase homolog OS=Nicotiana tabacum PE=2 SV=1//0
Cla001825	2927.1	334.014	3.1315	6.2143e-05	0.00036541	up	sp|Q9FX85|PER10_ARATH Peroxidase 10 OS=Arabidopsis thaliana GN=PER10 PE=1 SV=1//6.38134e-136
Cla001828	1136.52	300.297	1.9202	4.7643e-06	3.6286e-05	up	-//-
Cla001836	8.86631	0	Inf	0.010693	0.032801	up	sp|Q8VZG8|Y4885_ARATH Probable LRR receptor-like serine/threonine-protein kinase At4g08850 OS=Arabidopsis thaliana GN=At4g08850 PE=2 SV=3//0
Cla001847	724.781	156.936	2.2074	1.9956e-17	8.2611e-16	up	sp|P22196|PER2_ARAHY Cationic peroxidase 2 OS=Arachis hypogaea GN=PNC2 PE=2 SV=1//5.1804e-140
Cla001856	451.684	144.234	1.6469	8.3541e-11	1.4939e-09	up	sp|Q6PS57|CKS1_ORYSJ Cyclin-dependent kinases regulatory subunit 1 OS=Oryza sativa subsp. japonica GN=CKS1 PE=2 SV=1//4.63157e-49
Cla001857	4356.42	2339.04	0.89723	7.0065e-09	9.2448e-08	up	sp|Q9FYC2|PAO_ARATH Pheophorbide a oxygenase, chloroplastic OS=Arabidopsis thaliana GN=PAO PE=1 SV=1//0
Cla001881	89.3291	7.81968	3.5139	1.2015e-10	2.0876e-09	up	sp|Q9M9S0|ZHD4_ARATH Zinc-finger homeodomain protein 4 OS=Arabidopsis thaliana GN=ZHD4 PE=1 SV=1//1.61303e-68
Cla001890	1930.03	936.412	1.0434	5.473e-10	8.6285e-09	up	sp|Q8GZ45|SYTC_ARATH Probable threonine--tRNA ligase, cytoplasmic OS=Arabidopsis thaliana GN=At1g17960 PE=2 SV=2//0
Cla001891	9225.28	1404.56	2.7155	6.6415e-08	7.3019e-07	up	sp|A7SWH1|PESC_NEMVE Pescadillo homolog OS=Nematostella vectensis GN=v1g194255 PE=3 SV=1//4.50984e-87
Cla001896	1916.62	752.716	1.3484	5.039e-13	1.2166e-11	up	-//-
Cla001897	7575.49	3104.37	1.287	3.1734e-14	9.1516e-13	up	-//-
Cla001898	3172.15	1112.88	1.5112	1.5597e-10	2.6767e-09	up	-//-
Cla001937	2110.35	1119.14	0.91509	1.9686e-08	2.4032e-07	up	sp|Q9LQV2|RDR1_ARATH RNA-dependent RNA polymerase 1 OS=Arabidopsis thaliana GN=RDR1 PE=2 SV=1//0
Cla001944	718.309	375.313	0.93651	1.8344e-06	1.522e-05	up	sp|Q9ZU32|NADC_ARATH Nicotinate-nucleotide pyrophosphorylase [carboxylating], chloroplastic OS=Arabidopsis thaliana GN=QPT PE=2 SV=2//1.12666e-47
Cla001945	1231	461.562	1.4152	8.3238e-15	2.5587e-13	up	sp|Q9ZU32|NADC_ARATH Nicotinate-nucleotide pyrophosphorylase [carboxylating], chloroplastic OS=Arabidopsis thaliana GN=QPT PE=2 SV=2//3.13386e-91
Cla001947	4862.93	3130.38	0.63549	3.1918e-05	0.00020122	up	sp|Q9SSJ8|FAB1C_ARATH Putative 1-phosphatidylinositol-3-phosphate 5-kinase FAB1C OS=Arabidopsis thaliana GN=FAB1C PE=2 SV=1//0
Cla001950	131.302	0	Inf	2.4806e-29	2.7598e-27	up	sp|Q6NLC8|Y1648_ARATH Uncharacterized protein At1g66480 OS=Arabidopsis thaliana GN=At1g66480 PE=2 SV=1//1.33862e-39
Cla001970	7.96091	0	Inf	0.017606	0.049689	up	-//-
Cla001994	125.028	0	Inf	2.1001e-12	4.7214e-11	up	sp|Q9SA16|P2A09_ARATH Protein PHLOEM PROTEIN 2-LIKE A9 OS=Arabidopsis thaliana GN=PP2A9 PE=2 SV=1//1.83937e-34
Cla002001	10.6931	0	Inf	0.0039269	0.014014	up	sp|Q9SA16|P2A09_ARATH Protein PHLOEM PROTEIN 2-LIKE A9 OS=Arabidopsis thaliana GN=PP2A9 PE=2 SV=1//1.87111e-34
Cla002003	2598.37	193.834	3.7447	1.9669e-21	1.1671e-19	up	-//-
Cla002004	2920.09	220.981	3.724	1.23e-19	6.1596e-18	up	sp|O81865|P2A01_ARATH Protein PHLOEM PROTEIN 2-LIKE A1 OS=Arabidopsis thaliana GN=PP2A1 PE=2 SV=1//4.94058e-36
Cla002010	10.0909	0	Inf	0.0054699	0.018524	up	sp|O81865|P2A01_ARATH Protein PHLOEM PROTEIN 2-LIKE A1 OS=Arabidopsis thaliana GN=PP2A1 PE=2 SV=1//3.99778e-22
Cla002012	2267.02	1112.22	1.0274	0.0024674	0.0093198	up	-//-
Cla002034	171.268	2.76864	5.9509	1.0508e-29	1.2033e-27	up	sp|Q9SKX1|IBH1_ARATH Transcription factor IBH1 OS=Arabidopsis thaliana GN=IBH1 PE=1 SV=1//5.04937e-15
Cla002042	1068.74	151.234	2.8211	4.8669e-07	4.5213e-06	up	sp|P35694|XTH2_SOYBN Xyloglucan endotransglucosylase/hydrolase 2 OS=Glycine max PE=2 SV=1//2.87741e-142
Cla002054	3004.11	2218.88	0.43711	0.0040309	0.014338	up	sp|Q9ZT87|PEL1_ARATH Protein PELOTA 1 OS=Arabidopsis thaliana GN=PEL1 PE=2 SV=1//1.56424e-179
Cla002099	629.91	439.544	0.51914	0.014149	0.041348	up	sp|Q9LSD5|TCP20_ARATH Transcription factor TCP20 OS=Arabidopsis thaliana GN=TCP20 PE=1 SV=1//7.7215e-70
Cla002103	2315.29	1678.11	0.46436	0.0037097	0.013324	up	sp|Q75HX5|TLP8_ORYSJ Tubby-like F-box protein 8 OS=Oryza sativa subsp. japonica GN=TULP8 PE=2 SV=1//0
Cla002115	1639.11	1210.79	0.43697	0.0077518	0.024848	up	sp|O35604|NPC1_MOUSE Niemann-Pick C1 protein OS=Mus musculus GN=Npc1 PE=1 SV=2//2.79236e-47
Cla002120	91.7658	43.9673	1.0615	0.0085024	0.026926	up	sp|Q681N2|PUB15_ARATH U-box domain-containing protein 15 OS=Arabidopsis thaliana GN=PUB15 PE=2 SV=2//2.84703e-71
Cla002131	2080.18	1290.49	0.68879	8.9661e-05	0.00050654	up	sp|P0C8Q7|PP369_ARATH Pentatricopeptide repeat-containing protein At5g08305 OS=Arabidopsis thaliana GN=PCMP-E105 PE=2 SV=1//0
Cla002142	31.8778	4.31617	2.8847	0.00091067	0.0039195	up	-//-
Cla002166	9847.28	1895.68	2.377	3.1616e-21	1.8316e-19	up	sp|Q9SGA2|GDPD1_ARATH Glycerophosphodiester phosphodiesterase GDPD1, chloroplastic OS=Arabidopsis thaliana GN=GDPD1 PE=1 SV=1//3.53686e-164
Cla002170	443.628	113.917	1.9614	1.3038e-15	4.4556e-14	up	sp|Q9FY93|NAC83_ARATH NAC domain-containing protein 83 OS=Arabidopsis thaliana GN=NAC083 PE=1 SV=1//5.13019e-38
Cla002177	605.475	285.735	1.0834	9.996e-08	1.0667e-06	up	-//-
Cla002178	1809.61	740.673	1.2888	4.1706e-14	1.1767e-12	up	sp|P29450|TRXF_PEA Thioredoxin F-type, chloroplastic OS=Pisum sativum PE=2 SV=1//1.95655e-68
Cla002194	15041.3	8704.12	0.78916	0.00010414	0.00057802	up	sp|Q9C9W9|ADO3_ARATH Adagio protein 3 OS=Arabidopsis thaliana GN=ADO3 PE=1 SV=1//0
Cla002196	189.612	58.9775	1.6848	0.00010438	0.00057917	up	sp|P24280|SEC14_YEAST SEC14 cytosolic factor OS=Saccharomyces cerevisiae (strain ATCC 204508 / S288c) GN=SEC14 PE=1 SV=3//2.55409e-16
Cla002202	1421.27	651.202	1.126	5.1911e-08	5.7935e-07	up	sp|Q55512|DHAS_SYNY3 Aspartate-semialdehyde dehydrogenase OS=Synechocystis sp. (strain PCC 6803 / Kazusa) GN=asd PE=3 SV=2//2.48758e-116
Cla002212	111.673	55.3726	1.012	0.005356	0.018214	up	sp|Q9LS10|MT810_ARATH Probable S-adenosylmethionine-dependent methyltransferase At5g38100 OS=Arabidopsis thaliana GN=At5g38100 PE=2 SV=1//2.012e-79
Cla002214	916.055	371.173	1.3033	1.2289e-11	2.4962e-10	up	sp|Q9LQV2|RDR1_ARATH RNA-dependent RNA polymerase 1 OS=Arabidopsis thaliana GN=RDR1 PE=2 SV=1//0
Cla002216	4248.52	3005.91	0.49916	0.00092993	0.003988	up	-//-
Cla002222	443.517	301.589	0.55641	0.0085359	0.027028	up	-//-
Cla002228	1893.87	450.05	2.0732	1.144e-27	1.1145e-25	up	sp|O22820|U74F1_ARATH UDP-glycosyltransferase 74F1 OS=Arabidopsis thaliana GN=UGT74F1 PE=1 SV=1//5.98528e-129
Cla002230	9285.1	5350.47	0.79525	7.4137e-08	8.1009e-07	up	sp|O49447|ADT3_ARATH ADP,ATP carrier protein 3, mitochondrial OS=Arabidopsis thaliana GN=AAC3 PE=2 SV=1//0
Cla002232	28.797	5.49916	2.3886	0.0053449	0.018189	up	sp|Q9S7A9|SPL4_ARATH Squamosa promoter-binding-like protein 4 OS=Arabidopsis thaliana GN=SPL4 PE=1 SV=1//1.9374e-42
Cla002242	2863.3	2040.35	0.48886	0.0013922	0.0056569	up	sp|Q40194|RB11D_LOTJA Ras-related protein Rab11D OS=Lotus japonicus GN=RAB11D PE=2 SV=1//5.47089e-141
Cla002244	807.56	392.253	1.0418	5.4512e-08	6.0613e-07	up	-//-
Cla002245	1971.76	741.954	1.4101	9.1634e-17	3.6175e-15	up	sp|P39101|CAJ1_YEAST Protein CAJ1 OS=Saccharomyces cerevisiae (strain ATCC 204508 / S288c) GN=CAJ1 PE=1 SV=1//3.1503e-13
Cla002250	3029.73	1783.58	0.76442	1.0375e-06	9.0651e-06	up	sp|Q39010|KSG6_ARATH Shaggy-related protein kinase zeta OS=Arabidopsis thaliana GN=ASK6 PE=2 SV=2//0
Cla002251	16.4707	0	Inf	0.0001673	0.00088127	up	sp|A7NY33|PER4_VITVI Peroxidase 4 OS=Vitis vinifera GN=GSVIVT00023967001 PE=1 SV=1//1.77489e-140
Cla002252	570.085	189.088	1.5921	0.00019285	0.00099844	up	sp|Q0WRY5|CDL1_ARATH Serine/threonine-protein kinase CDL1 OS=Arabidopsis thaliana GN=CDL1 PE=1 SV=1//3.71275e-103
Cla002254	6112.81	3562.89	0.77879	1.8046e-07	1.8347e-06	up	sp|Q9LXT3|MBF1B_ARATH Multiprotein-bridging factor 1b OS=Arabidopsis thaliana GN=MBF1B PE=2 SV=1//3.26386e-88
Cla002255	10935.7	6667.76	0.71377	1.3719e-06	1.1675e-05	up	sp|I1SSI5|MAX2A_PETHY F-box/LRR-repeat MAX2 homolog A OS=Petunia hybrida GN=MAX2A PE=1 SV=1//0
Cla002256	590.491	214.734	1.4594	1.9699e-11	3.8727e-10	up	-//-
Cla002262	17120.8	10093.1	0.76238	3.8703e-06	2.993e-05	up	sp|Q96453|1433D_SOYBN 14-3-3-like protein D OS=Glycine max GN=GF14D PE=2 SV=1//5.62851e-126
Cla002264	26.1368	4.32456	2.5955	0.0040641	0.014432	up	-//-
Cla002269	802.854	381.025	1.0753	0.00036856	0.0017815	up	sp|Q93VR4|ML423_ARATH MLP-like protein 423 OS=Arabidopsis thaliana GN=MLP423 PE=2 SV=1//2.89151e-09
Cla002275	70.8604	21.1125	1.7469	0.00056213	0.0025663	up	-//-
Cla002280	421.151	161.908	1.3792	3.2281e-07	3.1416e-06	up	sp|Q9T048|DRL27_ARATH Disease resistance protein At4g27190 OS=Arabidopsis thaliana GN=At4g27190 PE=2 SV=1//1.75976e-51
Cla002313	298.136	44.7759	2.7352	2.3397e-08	2.8038e-07	up	sp|Q9CA40|NUDT1_ARATH Nudix hydrolase 1 OS=Arabidopsis thaliana GN=NUDT1 PE=1 SV=1//3.47853e-57
Cla002315	73.6416	5.46154	3.7531	0.0064275	0.021249	up	sp|Q8LAD7|IDA_ARATH Protein IDA OS=Arabidopsis thaliana GN=IDA PE=2 SV=1//1.1985e-08
Cla002321	121.744	42.0625	1.5332	6.2418e-05	0.00036681	up	sp|Q29PU4|CLE12_ARATH CLAVATA3/ESR (CLE)-related protein 12 OS=Arabidopsis thaliana GN=CLE12 PE=2 SV=1//4.037e-10
Cla002328	207.482	60.8011	1.7708	2.1438e-08	2.5944e-07	up	sp|P80065|INVB_DAUCA Beta-fructofuranosidase, soluble isoenzyme I OS=Daucus carota GN=INV*DC4 PE=1 SV=2//0
Cla002331	366.906	212.997	0.78458	0.00094646	0.0040482	up	sp|Q9LYP4|BAG3_ARATH BAG family molecular chaperone regulator 3 OS=Arabidopsis thaliana GN=BAG3 PE=1 SV=1//1.25139e-104
Cla002334	1419.51	1046.5	0.43982	0.0086859	0.027446	up	sp|Q8LG03|FB345_ARATH F-box protein At4g00755 OS=Arabidopsis thaliana GN=At4g00755 PE=2 SV=1//3.26093e-94
Cla002335	756.223	191.271	1.9832	1.0707e-15	3.6783e-14	up	sp|Q9LEX0|P2A13_ARATH F-box protein PP2-A13 OS=Arabidopsis thaliana GN=PP2A13 PE=1 SV=1//9.61725e-112
Cla002345	6764.09	2346.94	1.5271	3.2871e-07	3.188e-06	up	sp|Q9C5L3|GLPT1_ARATH Putative glycerol-3-phosphate transporter 1 OS=Arabidopsis thaliana GN=At3g47420 PE=2 SV=1//0
Cla002349	2918.31	1138.83	1.3576	3.0534e-17	1.243e-15	up	-//-
Cla002354	788.498	450.114	0.80882	1.8812e-05	0.00012598	up	sp|Q1XDS2|YCF20_PYRYE Uncharacterized protein ycf20 OS=Pyropia yezoensis GN=ycf20 PE=3 SV=1//1.76993e-12
Cla002358	75.7734	26.5118	1.5151	0.0016907	0.0067053	up	sp|Q9FLH8|SCRK7_ARATH Probable fructokinase-7 OS=Arabidopsis thaliana GN=At5g51830 PE=1 SV=1//7.04256e-155
Cla002366	7456.4	5727.37	0.38061	0.0090756	0.028515	up	sp|P35685|RL7A_ORYSJ 60S ribosomal protein L7a OS=Oryza sativa subsp. japonica GN=RPL7A PE=2 SV=1//3.73005e-140
Cla002367	1591.15	473.9	1.7474	2.4517e-12	5.4554e-11	up	sp|Q94KL7|SILD_FORIN Secoisolariciresinol dehydrogenase (Fragment) OS=Forsythia intermedia PE=1 SV=1//2.34594e-84
Cla002373	1175.51	657.054	0.8392	2.1506e-06	1.7576e-05	up	sp|Q9M1A8|RPB8B_ARATH DNA-directed RNA polymerases II, IV and V subunit 8B OS=Arabidopsis thaliana GN=NRPB8B PE=1 SV=1//1.00019e-36
Cla002379	1259.42	539.605	1.2228	6.8422e-12	1.436e-10	up	sp|F4ICF4|RBL10_ARATH RHOMBOID-like protein 10, chloroplastic OS=Arabidopsis thaliana GN=RBL10 PE=2 SV=1//4.13621e-78
Cla002395	12.2596	0.682628	4.1667	0.012219	0.03656	up	sp|Q9LX16|EIL4_ARATH Putative ETHYLENE INSENSITIVE 3-like 4 protein OS=Arabidopsis thaliana GN=EIL4 PE=3 SV=1//1.39002e-112
Cla002402	2473.48	435.698	2.5051	8.8414e-10	1.3429e-08	up	sp|O81916|YC22_ARATH Uncharacterized calcium-binding protein At1g02270 OS=Arabidopsis thaliana GN=At1g02270 PE=2 SV=2//1.17697e-164
Cla002404	1027.32	714.243	0.5244	0.0031836	0.011667	up	sp|O60121|YH77_SCHPO Uncharacterized protein C16G5.07c OS=Schizosaccharomyces pombe (strain 972 / ATCC 24843) GN=SPBC16G5.07c PE=3 SV=1//8.51072e-88
Cla002409	1565.38	1151.96	0.44242	0.0075931	0.02443	up	sp|Q9FLU1|BIN4_ARATH DNA-binding protein BIN4 OS=Arabidopsis thaliana GN=BIN4 PE=1 SV=2//2.22208e-40
Cla002414	597.918	360.843	0.72858	0.00025024	0.0012603	up	sp|P50433|GLYM_SOLTU Serine hydroxymethyltransferase, mitochondrial OS=Solanum tuberosum PE=2 SV=1//0
Cla002421	1608.56	888.483	0.85635	2.9007e-05	0.00018435	up	-//-
Cla002422	5214.31	3489.06	0.57964	0.00011365	0.0006251	up	sp|Q9ZQF9|MBR1_ARATH E3 ubiquitin-protein ligase MBR1 OS=Arabidopsis thaliana GN=MBR1 PE=1 SV=1//2.4897e-25
Cla002430	10774.2	8127.16	0.40676	0.0068184	0.022289	up	sp|P17783|MDHM_CITLA Malate dehydrogenase, mitochondrial OS=Citrullus lanatus GN=MMDH PE=1 SV=1//0
Cla002431	214.533	97.4318	1.1387	0.0015548	0.0062286	up	sp|Q9C5J6|IPT9_ARATH tRNA dimethylallyltransferase 9 OS=Arabidopsis thaliana GN=IPT9 PE=2 SV=1//0
Cla002432	57.9138	4.52145	3.6791	8.9437e-08	9.6276e-07	up	sp|Q1PFD9|TBL31_ARATH Protein trichome birefringence-like 31 OS=Arabidopsis thaliana GN=TBL31 PE=2 SV=1//0
Cla002443	43.3093	13.0113	1.7349	0.016019	0.045884	up	sp|Q9M3B4|RID3_ARATH Protein ROOT INITIATION DEFECTIVE 3 OS=Arabidopsis thaliana GN=RID3 PE=1 SV=1//3.28366e-32
Cla002452	126.487	39.2375	1.6887	0.0024145	0.0091395	up	-//-
Cla002470	1326.9	207.884	2.6742	7.6147e-07	6.8271e-06	up	sp|Q40294|AOX1_MANIN Ubiquinol oxidase, mitochondrial OS=Mangifera indica GN=AOMI 1 PE=1 SV=2//4.1283e-173
Cla002553	1157.95	824.605	0.48979	0.0067397	0.022061	up	sp|F4JRE0|TMN12_ARATH Transmembrane 9 superfamily member 12 OS=Arabidopsis thaliana GN=TMN12 PE=2 SV=1//0
Cla002558	533.468	179.162	1.5741	1.46e-09	2.1303e-08	up	sp|Q9SRE4|UGAL2_ARATH UDP-galactose transporter 2 OS=Arabidopsis thaliana GN=UDP-GALT2 PE=2 SV=1//2.87223e-164
Cla002563	2230.48	770.255	1.5339	4.6995e-20	2.4539e-18	up	sp|Q500U8|TKPR1_ARATH Tetraketide alpha-pyrone reductase 1 OS=Arabidopsis thaliana GN=TKPR1 PE=1 SV=1//6.55642e-162
Cla002567	248.488	159.938	0.63566	0.01224	0.036609	up	sp|P93025|PHOT2_ARATH Phototropin-2 OS=Arabidopsis thaliana GN=PHOT2 PE=1 SV=2//6.76744e-28
Cla002572	215.32	121.307	0.82782	0.0034126	0.012388	up	sp|Q9FMK7|BT1_ARATH BTB/POZ and TAZ domain-containing protein 1 OS=Arabidopsis thaliana GN=BT1 PE=1 SV=1//8.45741e-133
Cla002573	67.1462	3.64034	4.2052	0.00583	0.019595	up	sp|Q93Z25|PLY22_ARATH Probable pectate lyase 22 OS=Arabidopsis thaliana GN=At5g63180 PE=2 SV=1//0
Cla002578	166.663	52.7135	1.6607	1.8413e-06	1.5251e-05	up	sp|Q9M8Y0|SEC_ARATH Probable UDP-N-acetylglucosamine--peptide N-acetylglucosaminyltransferase SEC OS=Arabidopsis thaliana GN=SEC PE=2 SV=1//4.68529e-10
Cla002593	532.18	367.608	0.53374	0.0075349	0.024267	up	sp|P47923|NDK2_PEA Nucleoside diphosphate kinase 2, chloroplastic OS=Pisum sativum GN=NDPK2 PE=1 SV=1//2.85657e-93
Cla002608	141.786	78.9746	0.84425	0.011828	0.035612	up	sp|Q8LFN2|Y3037_ARATH Probable inactive leucine-rich repeat receptor-like protein kinase At3g03770 OS=Arabidopsis thaliana GN=At3g03770 PE=2 SV=1//2.72883e-139
Cla002611	1181.71	206.091	2.5195	6.0435e-14	1.662e-12	up	sp|Q9SZX3|ASSY_ARATH Argininosuccinate synthase, chloroplastic OS=Arabidopsis thaliana GN=At4g24830 PE=2 SV=3//0
Cla002628	127.827	7.94246	4.0085	7.5666e-17	3.0175e-15	up	sp|Q6EU39|MADS6_ORYSJ MADS-box transcription factor 6 OS=Oryza sativa subsp. japonica GN=MADS6 PE=1 SV=1//9.29018e-47
Cla002630	99.9095	4.27022	4.5482	3.4894e-15	1.1293e-13	up	sp|P0DI11|SP13B_ARATH Squamosa promoter-binding-like protein 13B OS=Arabidopsis thaliana GN=SPL13B PE=3 SV=1//6.20861e-52
Cla002632	2029.08	591.59	1.7782	1.3238e-25	1.0537e-23	up	sp|Q9SZN7|HIP26_ARATH Heavy metal-associated isoprenylated plant protein 26 OS=Arabidopsis thaliana GN=HIPP26 PE=1 SV=1//2.27775e-06
Cla002641	7931.61	376.76	4.3959	1.7933e-07	1.8253e-06	up	sp|O82587|SWT12_ARATH Bidirectional sugar transporter SWEET12 OS=Arabidopsis thaliana GN=SWEET12 PE=1 SV=1//2.40774e-108
Cla002643	24.4156	0	Inf	0.002483	0.0093678	up	sp|Q93W88|BH137_ARATH Transcription factor bHLH137 OS=Arabidopsis thaliana GN=BHLH137 PE=2 SV=1//7.99917e-53
Cla002645	965.037	645.476	0.58022	0.0011575	0.0048182	up	sp|Q9LSE2|ICE1_ARATH Transcription factor ICE1 OS=Arabidopsis thaliana GN=SCRM PE=1 SV=1//1.12817e-85
Cla002657	40.2229	1.16837	5.1055	0.00054345	0.0024974	up	sp|O64759|CAAT5_ARATH Cationic amino acid transporter 5 OS=Arabidopsis thaliana GN=CAT5 PE=1 SV=1//0
Cla002690	2252.5	989.211	1.1872	2.4537e-13	6.1362e-12	up	sp|Q9FVQ4|PLGG1_ARATH Plastidal glycolate/glycerate translocator 1, chloroplastic OS=Arabidopsis thaliana GN=PLGG1 PE=2 SV=1//0
Cla002694	1110.2	833.738	0.41316	0.015554	0.044794	up	sp|Q9M122|GEML2_ARATH GEM-like protein 2 OS=Arabidopsis thaliana GN=At4g01600 PE=2 SV=1//1.21636e-60
Cla002695	201.733	78.1542	1.3681	6.3124e-05	0.00037007	up	sp|Q9M122|GEML2_ARATH GEM-like protein 2 OS=Arabidopsis thaliana GN=At4g01600 PE=2 SV=1//1.13896e-59
Cla002711	299.269	136.648	1.131	1.513e-05	0.00010355	up	-//-
Cla002714	52.5125	0.364034	7.1724	5.7117e-10	8.976e-09	up	-//-
Cla002719	832.316	305.278	1.447	2.902e-09	4.0473e-08	up	sp|Q6GLM5|DESI1_XENLA Desumoylating isopeptidase 1 OS=Xenopus laevis GN=desi1 PE=2 SV=1//1.17834e-41
Cla002724	40.2457	13.3826	1.5885	0.01103	0.033639	up	-//-
Cla002742	32.582	0.318594	6.6762	0.0024939	0.0094037	up	sp|Q944R1|PLY15_ARATH Probable pectate lyase 15 OS=Arabidopsis thaliana GN=At4g13710 PE=2 SV=1//0
Cla002743	327.602	156.973	1.0614	1.4734e-05	0.00010116	up	-//-
Cla002746	1417.9	1036.13	0.45256	0.007191	0.023312	up	sp|Q94JQ3|GLYP3_ARATH Serine hydroxymethyltransferase 3, chloroplastic OS=Arabidopsis thaliana GN=SHM3 PE=1 SV=2//0
Cla002748	169.251	69.7976	1.2779	5.6365e-05	0.00033394	up	sp|Q9STS9|PP268_ARATH Putative pentatricopeptide repeat-containing protein At3g47840 OS=Arabidopsis thaliana GN=PCMP-E43 PE=3 SV=1//8.17563e-14
Cla002751	1015.4	715.033	0.50596	0.0095713	0.029824	up	-//-
Cla002759	134.749	47.5151	1.5038	4.8319e-05	0.00028978	up	-//-
Cla002774	15.9071	2.29129	2.7954	0.017563	0.049595	up	sp|O22938|PXC3_ARATH Leucine-rich repeat receptor-like tyrosine-protein kinase PXC3 OS=Arabidopsis thaliana GN=PXC3 PE=2 SV=1//0
Cla002779	34.1533	1.27438	4.7442	8.3443e-05	0.00047455	up	sp|O14114|YEJJ_SCHPO Uncharacterized AAA domain-containing protein C31G5.19 OS=Schizosaccharomyces pombe (strain 972 / ATCC 24843) GN=SPAC31G5.19 PE=3 SV=1//3.30495e-82
Cla002793	2030.45	821.171	1.306	1.3718e-11	2.7663e-10	up	sp|P42732|RR13_ARATH 30S ribosomal protein S13, chloroplastic OS=Arabidopsis thaliana GN=RPS13 PE=2 SV=1//1.35056e-82
Cla002806	27.9095	7.01019	1.9932	0.013934	0.040844	up	sp|P50699|TLPH_ARATH Thaumatin-like protein OS=Arabidopsis thaliana GN=At1g18250 PE=2 SV=2//9.43143e-77
Cla002814	5400.68	3901.79	0.469	0.0013873	0.0056427	up	sp|Q9LD45|BI1_ARATH Bax inhibitor 1 OS=Arabidopsis thaliana GN=BI-1 PE=1 SV=1//3.92175e-115
Cla002827	123.535	3.35308	5.2033	1.3944e-13	3.6067e-12	up	sp|Q9SZN7|HIP26_ARATH Heavy metal-associated isoprenylated plant protein 26 OS=Arabidopsis thaliana GN=HIPP26 PE=1 SV=1//8.20101e-11
Cla002835	63.9495	20.4455	1.6451	0.0015023	0.0060355	up	-//-
Cla002858	332.404	120.413	1.4649	5.2056e-09	6.9959e-08	up	sp|Q9LX31|GUN4C_ARATH Tetrapyrrole-binding protein, chloroplastic OS=Arabidopsis thaliana GN=GUN4 PE=1 SV=1//5.54615e-69
Cla002866	358.838	169.293	1.0838	2.2482e-05	0.00014723	up	sp|Q84LH3|WEX_ARATH Werner Syndrome-like exonuclease OS=Arabidopsis thaliana GN=WEX PE=1 SV=1//7.9549e-26
Cla002876	15.0761	0.318594	5.5644	0.0017161	0.0067873	up	sp|Q9LDH1|SIB1_ARATH Sigma factor binding protein 1, chloroplastic OS=Arabidopsis thaliana GN=SIB1 PE=1 SV=1//2.181e-09
Cla002877	165.216	33.6808	2.2944	1.7952e-10	3.0488e-09	up	sp|P47082|AVT1_YEAST Vacuolar amino acid transporter 1 OS=Saccharomyces cerevisiae (strain ATCC 204508 / S288c) GN=AVT1 PE=1 SV=1//2.17556e-22
Cla002882	11.1046	0	Inf	0.0032038	0.011728	up	-//-
Cla002886	979.508	124.086	2.9807	3.6485e-14	1.0429e-12	up	sp|Q5HZL9|HDHD3_XENLA Haloacid dehalogenase-like hydrolase domain-containing protein 3 OS=Xenopus laevis GN=hdhd3 PE=2 SV=1//4.66569e-17
Cla002889	114.84	5.00719	4.5195	3.4332e-07	3.3132e-06	up	sp|Q9SLG8|SSL2_ARATH Protein STRICTOSIDINE SYNTHASE-LIKE 2 OS=Arabidopsis thaliana GN=SSL2 PE=2 SV=1//2.54459e-109
Cla002892	2090.79	695.379	1.5882	8.9957e-21	5.0183e-19	up	-//-
Cla002908	542.821	177.466	1.6129	0.014116	0.041297	up	-//-
Cla002910	2141.47	757.242	1.4998	0.0015994	0.0063876	up	-//-
Cla002911	16665.2	4801.38	1.7953	1.9606e-11	3.8584e-10	up	sp|Q9FKP2|CCX2_ARATH Cation/calcium exchanger 2 OS=Arabidopsis thaliana GN=CCX2 PE=3 SV=1//2.09527e-137
Cla002940	7.95702	0	Inf	0.017629	0.049733	up	sp|Q944R1|PLY15_ARATH Probable pectate lyase 15 OS=Arabidopsis thaliana GN=At4g13710 PE=2 SV=1//0
Cla002946	2351.23	1563.15	0.58896	0.00017643	0.00092225	up	sp|Q55680|Y005_SYNY3 Uncharacterized protein sll0005 OS=Synechocystis sp. (strain PCC 6803 / Kazusa) GN=sll0005 PE=3 SV=1//9.00696e-126
Cla002948	3329.81	2059.56	0.6931	1.258e-05	8.7384e-05	up	sp|Q69ZF3|GBA2_MOUSE Non-lysosomal glucosylceramidase OS=Mus musculus GN=Gba2 PE=1 SV=2//1.07431e-71
Cla002957	82.9709	26.1797	1.6642	0.00034572	0.0016794	up	sp|D3ZDK2|UB2D1_RAT Ubiquitin-conjugating enzyme E2 D1 OS=Rattus norvegicus GN=Ube2d1 PE=1 SV=1//8.51244e-48
Cla002959	227.896	92.0616	1.3077	7.2035e-06	5.2789e-05	up	sp|Q9SVQ0|ERF62_ARATH Ethylene-responsive transcription factor ERF062 OS=Arabidopsis thaliana GN=ERF062 PE=2 SV=1//4.00575e-43
Cla002960	3995.96	3024.98	0.40162	0.010053	0.031146	up	-//-
Cla002982	545.609	189.533	1.5254	2.7428e-12	6.0685e-11	up	sp|Q38867|CP19C_ARATH Peptidyl-prolyl cis-trans isomerase CYP19-3 OS=Arabidopsis thaliana GN=CYP19-3 PE=2 SV=2//3.547e-47
Cla002983	3954.38	1690.49	1.226	4.0821e-15	1.3039e-13	up	sp|Q9LKR8|RAF1_ARATH Rubisco accumulation factor 1, chloroplastic OS=Arabidopsis thaliana GN=RAF1 PE=2 SV=1//2.37635e-127
Cla003009	28.7875	4.89279	2.5567	0.0031489	0.011555	up	sp|Q56Z59|PATL3_ARATH Patellin-3 OS=Arabidopsis thaliana GN=PATL3 PE=1 SV=2//9.07975e-08
Cla003016	25.1555	3.83882	2.7121	0.004153	0.014681	up	sp|Q9SIT5|CHX15_ARATH Cation/H(+) antiporter 15 OS=Arabidopsis thaliana GN=CHX15 PE=2 SV=1//0
Cla003022	637.154	253.93	1.3272	1.647e-10	2.8141e-09	up	-//-
Cla003082	83.3881	31.6459	1.3978	0.0025202	0.0094975	up	sp|Q4I8E9|PNS1_GIBZE Protein PNS1 OS=Gibberella zeae (strain PH-1 / ATCC MYA-4620 / FGSC 9075 / NRRL 31084) GN=PNS1 PE=3 SV=1//7.417e-11
Cla003124	696.331	409.124	0.76724	8.0884e-05	0.00046121	up	sp|Q9LJE2|SYKM_ARATH Lysine--tRNA ligase, chloroplastic/mitochondrial OS=Arabidopsis thaliana GN=OVA5 PE=2 SV=1//7.20202e-105
Cla003125	810.152	567.176	0.5144	0.0050887	0.017454	up	sp|Q9LJE2|SYKM_ARATH Lysine--tRNA ligase, chloroplastic/mitochondrial OS=Arabidopsis thaliana GN=OVA5 PE=2 SV=1//3.75186e-87
Cla003127	2066.01	882.18	1.2277	1.2594e-13	3.288e-12	up	-//-
Cla003133	232.808	71.9087	1.6949	0.00045507	0.0021441	up	sp|Q7G191|ALDO4_ARATH Benzaldehyde dehydrogenase (NAD(+)) OS=Arabidopsis thaliana GN=AAO4 PE=1 SV=2//0
Cla003135	14.7113	1.60866	3.193	0.015479	0.044606	up	sp|D9UBX6|RTM2B_ARATH Inactive protein RESTRICTED TEV MOVEMENT 2 OS=Arabidopsis thaliana GN=RTM2 PE=3 SV=1//3.64885e-12
Cla003137	956.685	557.348	0.77947	0.00022418	0.0011438	up	sp|Q9FGC7|ZEP_ARATH Zeaxanthin epoxidase, chloroplastic OS=Arabidopsis thaliana GN=ZEP PE=1 SV=1//2.81997e-06
Cla003174	26.9944	4.3611	2.6299	0.0030429	0.011212	up	sp|O64864|YLS3_ARATH Protein YLS3 OS=Arabidopsis thaliana GN=YLS3 PE=2 SV=1//3.02805e-42
Cla003181	21.8857	3.45127	2.6648	0.0090364	0.028415	up	-//-
Cla003184	770.097	530.021	0.53899	0.0043488	0.015293	up	-//-
Cla003185	328.809	169.358	0.95717	8.0071e-05	0.00045697	up	sp|P54453|YQEH_BACSU Uncharacterized protein YqeH OS=Bacillus subtilis (strain 168) GN=yqeH PE=1 SV=1//6.81679e-46
Cla003188	2291.73	0.318594	12.812	3.7809e-11	7.0981e-10	up	sp|P19135|PER2_CUCSA Peroxidase 2 (Fragment) OS=Cucumis sativus PE=2 SV=1//2.9353e-160
Cla003189	70.6913	0.318594	7.7937	0.0037426	0.013422	up	sp|P19135|PER2_CUCSA Peroxidase 2 (Fragment) OS=Cucumis sativus PE=2 SV=1//1.23046e-130
Cla003222	5099.2	3978.6	0.35801	0.016885	0.047931	up	sp|Q9LW29|AFB2_ARATH Protein AUXIN SIGNALING F-BOX 2 OS=Arabidopsis thaliana GN=AFB2 PE=1 SV=1//0
Cla003230	85.1799	11.2798	2.9168	2.9065e-08	3.4059e-07	up	sp|Q9SCU0|SDR2A_ARATH Short-chain dehydrogenase reductase 2a OS=Arabidopsis thaliana GN=SDR2a PE=3 SV=1//1.12744e-73
Cla003242	2900.07	1825.25	0.66799	1.7957e-05	0.000121	up	-//-
Cla003245	203.127	76.9373	1.4006	3.7258e-06	2.8985e-05	up	-//-
Cla003250	454.164	309.681	0.55243	0.0077279	0.024785	up	-//-
Cla003254	676.98	326.03	1.0541	0.0004408	0.0020854	up	-//-
Cla003279	129.543	40.0673	1.6929	1.215e-05	8.4785e-05	up	sp|Q9LDH0|XYLT_ARATH Beta-(1,2)-xylosyltransferase OS=Arabidopsis thaliana GN=XYLT PE=1 SV=1//0
Cla003284	1228.64	660.551	0.89532	3.6027e-07	3.4547e-06	up	sp|Q9M4Y3|RR10_MESCR 30S ribosomal protein S10, chloroplastic OS=Mesembryanthemum crystallinum GN=RPS10 PE=2 SV=1//1.23263e-81
Cla003286	346.641	91.9009	1.9153	2.4824e-13	6.1922e-12	up	sp|Q9LK64|AB3C_ARATH ABC transporter C family member 3 OS=Arabidopsis thaliana GN=ABCC3 PE=1 SV=1//0
Cla003299	322.461	109.534	1.5577	0.0019925	0.0077436	up	sp|Q94EG9|ZIP11_ARATH Zinc transporter 11 OS=Arabidopsis thaliana GN=ZIP11 PE=2 SV=1//7.78488e-109
Cla003311	136.823	18.5072	2.8861	0.0014492	0.0058485	up	sp|Q9FM65|FLA1_ARATH Fasciclin-like arabinogalactan protein 1 OS=Arabidopsis thaliana GN=FLA1 PE=1 SV=1//1.88857e-144
Cla003319	92.936	18.8285	2.3033	6.1861e-07	5.6392e-06	up	sp|Q8VZK9|CSLE1_ARATH Cellulose synthase-like protein E1 OS=Arabidopsis thaliana GN=CSLE1 PE=2 SV=1//0
Cla003320	17727	13010	0.44632	0.0022643	0.0086477	up	sp|Q651X6|CSLE6_ORYSJ Cellulose synthase-like protein E6 OS=Oryza sativa subsp. japonica GN=CSLE6 PE=2 SV=1//0
Cla003330	12760.6	3123.81	2.0303	0.00031069	0.001527	up	sp|P49351|FPPS1_LUPAL Farnesyl pyrophosphate synthase 1 OS=Lupinus albus GN=FPS1 PE=2 SV=1//0
Cla003338	2575.86	778.869	1.7256	2.9104e-08	3.4084e-07	up	sp|Q6P829|NOSIP_XENTR Nitric oxide synthase-interacting protein OS=Xenopus tropicalis GN=nosip PE=2 SV=1//1.88623e-41
Cla003340	1461.75	1063.38	0.45904	0.005414	0.01837	up	sp|Q84W65|SUFE1_ARATH SufE-like protein 1, chloroplastic/mitochondrial OS=Arabidopsis thaliana GN=SUFE1 PE=1 SV=2//8.13204e-121
Cla003347	430.87	43.633	3.3038	5.2158e-32	7.142e-30	up	sp|Q9ZVH0|FEZ_ARATH Protein FEZ OS=Arabidopsis thaliana GN=FEZ PE=2 SV=1//1.08823e-79
Cla003367	2299.72	547.839	2.0696	6.6523e-07	6.0249e-06	up	sp|Q9SGA0|ACR6_ARATH ACT domain-containing protein ACR6 OS=Arabidopsis thaliana GN=ACR6 PE=2 SV=1//0
Cla003368	298.65	179.498	0.73449	0.0021483	0.0082691	up	sp|Q8LEF6|AB11I_ARATH ABC transporter I family member 11, chloroplastic OS=Arabidopsis thaliana GN=ABCI11 PE=2 SV=1//8.08638e-08
Cla003371	875.365	171.14	2.3547	0.0003153	0.0015477	up	-//-
Cla003373	234.026	79.6375	1.5551	6.5469e-05	0.00038222	up	-//-
Cla003374	170.814	79.6515	1.1007	0.01245	0.037134	up	-//-
Cla003375	907.571	351.801	1.3673	2.185e-05	0.00014362	up	-//-
Cla003377	204.792	43.1375	2.2471	1.1134e-06	9.6382e-06	up	sp|F4I9E1|NFD4_ARATH Protein NUCLEAR FUSION DEFECTIVE 4 OS=Arabidopsis thaliana GN=NFD4 PE=3 SV=1//3.89429e-12
Cla003398	69.2503	32.5584	1.0888	0.01772	0.049939	up	sp|Q9CAB7|PXG4_ARATH Probable peroxygenase 4 OS=Arabidopsis thaliana GN=PXG4 PE=1 SV=1//3.68399e-90
Cla003403	31015.4	10786.5	1.5238	3.812e-21	2.2018e-19	up	sp|P93824|ACCH6_ARATH 1-aminocyclopropane-1-carboxylate oxidase homolog 6 OS=Arabidopsis thaliana GN=At1g04350 PE=2 SV=1//1.14461e-104
Cla003404	621.997	309.65	1.0063	0.0028733	0.010658	up	sp|Q9FYK2|CML25_ARATH Probable calcium-binding protein CML25 OS=Arabidopsis thaliana GN=CML25 PE=2 SV=1//2.93303e-06
Cla003413	8644.03	2592.64	1.7373	5.852e-30	6.7804e-28	up	sp|Q9SE43|REV_ARATH Homeobox-leucine zipper protein REVOLUTA OS=Arabidopsis thaliana GN=REV PE=1 SV=2//0
Cla003448	37.1915	10.7654	1.7886	0.007577	0.02439	up	sp|C0LGR3|Y4265_ARATH Probable LRR receptor-like serine/threonine-protein kinase At4g26540 OS=Arabidopsis thaliana GN=At4g26540 PE=2 SV=1//0
Cla003470	315.551	163.8	0.94594	0.00015639	0.00082987	up	sp|Q5R8J8|DNJB4_PONAB DnaJ homolog subfamily B member 4 OS=Pongo abelii GN=DNAJB4 PE=2 SV=1//9.0395e-33
Cla003474	220.57	132.368	0.73669	0.0076712	0.024628	up	sp|Q681Y3|Y1099_ARATH Putative transferase At1g60990, chloroplastic OS=Arabidopsis thaliana GN=At1g60990 PE=1 SV=1//3.75025e-40
Cla003500	602.091	414.104	0.53999	0.0054193	0.018384	up	sp|Q9FRS4|PPR22_ARATH Pentatricopeptide repeat-containing protein At1g08610 OS=Arabidopsis thaliana GN=At1g08610 PE=2 SV=1//0
Cla003502	354.223	109.078	1.6993	1.1948e-11	2.4344e-10	up	sp|Q9SR00|PP213_ARATH Pentatricopeptide repeat-containing protein At3g04760, chloroplastic OS=Arabidopsis thaliana GN=At3g04760 PE=2 SV=1//0
Cla003508	499.048	191.443	1.3823	4.657e-10	7.4378e-09	up	sp|Q9LK31|Y3272_ARATH Kelch repeat-containing protein At3g27220 OS=Arabidopsis thaliana GN=At3g27220 PE=2 SV=1//0
Cla003520	4650.67	1436.85	1.6945	9.6962e-14	2.5727e-12	up	sp|Q9SGD6|AROD6_ARATH Arogenate dehydratase/prephenate dehydratase 6, chloroplastic OS=Arabidopsis thaliana GN=ADT6 PE=1 SV=1//0
Cla003538	447.929	59.797	2.9051	1.6936e-14	5.0554e-13	up	sp|O23193|CBSX1_ARATH CBS domain-containing protein CBSX1, chloroplastic OS=Arabidopsis thaliana GN=CBSX1 PE=1 SV=2//1.89998e-101
Cla003550	174.009	84.8478	1.0362	0.00095781	0.0040887	up	-//-
Cla003564	758.193	253.791	1.5789	8.5687e-15	2.6257e-13	up	sp|Q8H038|KATAM_ORYSJ Xyloglucan galactosyltransferase KATAMARI1 homolog OS=Oryza sativa subsp. japonica GN=Os03g0144800 PE=2 SV=1//1.42917e-100
Cla003573	211.392	135.522	0.64139	0.016541	0.047111	up	-//-
Cla003597	197.556	82.7985	1.2546	0.0076669	0.024619	up	sp|C0LGQ5|GSO1_ARATH LRR receptor-like serine/threonine-protein kinase GSO1 OS=Arabidopsis thaliana GN=GSO1 PE=2 SV=1//3.20154e-08
Cla003599	3208.03	1646.19	0.96256	4.0377e-08	4.5886e-07	up	sp|Q6GQ39|TM135_XENLA Transmembrane protein 135 OS=Xenopus laevis GN=tmem135 PE=2 SV=1//4.56667e-08
Cla003602	1366.05	828.098	0.72214	1.9933e-05	0.00013227	up	-//-
Cla003604	1476.33	938.604	0.65343	0.00012031	0.00065813	up	-//-
Cla003615	369.266	181.095	1.0279	4.5375e-05	0.00027414	up	sp|Q8KFI4|PHS_CHLTE Putative pterin-4-alpha-carbinolamine dehydratase OS=Chlorobium tepidum (strain ATCC 49652 / DSM 12025 / NBRC 103806 / TLS) GN=CT0342 PE=3 SV=1//1.25455e-17
Cla003617	474.767	317.204	0.58181	0.0058956	0.019774	up	sp|Q43804|OLEO1_PRUDU Oleosin 1 OS=Prunus dulcis GN=OLE1 PE=2 SV=1//6.21822e-09
Cla003618	2159.62	539.947	1.9999	2.8326e-06	2.2602e-05	up	sp|Q8VY90|EF105_ARATH Ethylene-responsive transcription factor ERF105 OS=Arabidopsis thaliana GN=ERF105 PE=2 SV=1//2.47311e-55
Cla003619	1745.82	583.747	1.5805	2.1767e-15	7.224e-14	up	sp|Q9LY05|EF106_ARATH Ethylene-responsive transcription factor ERF106 OS=Arabidopsis thaliana GN=ERF106 PE=2 SV=1//1.57275e-32
Cla003625	1391.54	1005.3	0.46906	0.0049295	0.017009	up	-//-
Cla003629	615.81	434.242	0.50399	0.011988	0.035986	up	sp|Q0WP01|PTR9_ARATH Protein NRT1/ PTR FAMILY 5.10 OS=Arabidopsis thaliana GN=NPF5.10 PE=2 SV=1//0
Cla003637	1702.52	1218.3	0.4828	0.0038126	0.01365	up	-//-
Cla003641	884.852	283.954	1.6398	1.8197e-14	5.4069e-13	up	sp|Q9FF18|C7351_ARATH Cytokinin hydroxylase OS=Arabidopsis thaliana GN=CYP735A1 PE=1 SV=1//2.39493e-75
Cla003642	5470.78	3148.42	0.79712	8.3463e-08	9.0542e-07	up	sp|Q9SMT7|4CLLA_ARATH Oxalate--CoA ligase OS=Arabidopsis thaliana GN=AAE3 PE=1 SV=1//0
Cla003697	50.1752	11.2266	2.1601	0.00045436	0.0021412	up	-//-
Cla003698	6132.01	2156.86	1.5074	7.0424e-15	2.1901e-13	up	-//-
Cla003710	920.557	592.199	0.63643	0.00094452	0.0040408	up	sp|Q9BYX2|TBD2A_HUMAN TBC1 domain family member 2A OS=Homo sapiens GN=TBC1D2 PE=1 SV=3//2.12857e-55
Cla003740	11.9244	0.728068	4.0337	0.013937	0.040848	up	sp|Q4VZL2|NDHH_CUCSA NAD(P)H-quinone oxidoreductase subunit H, chloroplastic OS=Cucumis sativus GN=ndhH PE=3 SV=1//0
Cla003741	23.9971	2.40461	3.319	0.0014611	0.0058901	up	-//-
Cla003751	6118.83	3198.3	0.93595	8.097e-10	1.2377e-08	up	sp|Q9FV46|ZDS_TARER Zeta-carotene desaturase, chloroplastic/chromoplastic OS=Tagetes erecta PE=2 SV=1//0
Cla003760	560.748	350.438	0.67819	0.00089839	0.0038739	up	-//-
Cla003763	1215.93	883.362	0.46098	0.0059377	0.019885	up	-//-
Cla003784	2613.83	2012.82	0.37695	0.016156	0.046204	up	sp|Q6ICX4|PTBP3_ARATH Polypyrimidine tract-binding protein homolog 3 OS=Arabidopsis thaliana GN=At1g43190 PE=2 SV=1//0
Cla003789	1650.02	694.685	1.2481	2.6821e-05	0.00017191	up	sp|Q70II3|EF110_ARATH Ethylene-responsive transcription factor ERF110 OS=Arabidopsis thaliana GN=ERF110 PE=2 SV=2//7.07456e-28
Cla003793	3231.82	2438.17	0.40655	0.0081873	0.026046	up	sp|Q9LZM3|PPCS2_ARATH Phosphopantothenate--cysteine ligase 2 OS=Arabidopsis thaliana GN=PPCS2 PE=2 SV=2//4.37889e-134
Cla003803	3295.62	2109.92	0.64336	2.8828e-05	0.00018339	up	sp|Q8L7M4|SDN5_ARATH Small RNA degrading nuclease 5 OS=Arabidopsis thaliana GN=SDN5 PE=2 SV=2//0
Cla003806	865.423	607.941	0.50947	0.0062605	0.020791	up	sp|Q8W234|SEUSS_ARATH Transcriptional corepressor SEUSS OS=Arabidopsis thaliana GN=SEU PE=1 SV=1//2.54766e-43
Cla003812	22.8824	1.0921	4.3891	0.0002133	0.001094	up	-//-
Cla003888	485.72	100.758	2.2692	3.2693e-08	3.8014e-07	up	-//-
Cla003890	1676.78	948.543	0.82191	7.946e-07	7.0852e-06	up	-//-
Cla003901	2104.92	1622.13	0.37588	0.014936	0.043265	up	sp|Q3ED68|Y1295_ARATH Uncharacterized PKHD-type hydroxylase At1g22950 OS=Arabidopsis thaliana GN=At1g22950 PE=2 SV=2//9.59295e-137
Cla003903	302.221	154.975	0.96357	0.00010541	0.00058437	up	sp|F4HXY7|PSS1_ARATH CDP-diacylglycerol--serine O-phosphatidyltransferase 1 OS=Arabidopsis thaliana GN=PSS1 PE=1 SV=1//0
Cla003904	173.73	75.1071	1.2098	0.00013508	0.00072815	up	sp|Q9SJE2|FATB_ARATH Palmitoyl-acyl carrier protein thioesterase, chloroplastic OS=Arabidopsis thaliana GN=FATB PE=1 SV=1//3.79021e-96
Cla003910	912.049	545.072	0.74267	0.011561	0.034989	up	-//-
Cla003917	2119.42	1224.45	0.79153	9.8008e-07	8.6019e-06	up	sp|Q9C9A2|PP112_ARATH Pentatricopeptide repeat-containing protein At1g71060, mitochondrial OS=Arabidopsis thaliana GN=At1g71060 PE=2 SV=1//0
Cla003918	1783.6	313.579	2.5079	1.9844e-42	4.6258e-40	up	-//-
Cla003919	4441.11	2874.13	0.6278	3.4868e-05	0.00021778	up	sp|O14197|YDQ4_SCHPO Uncharacterized transporter C5D6.04 OS=Schizosaccharomyces pombe (strain 972 / ATCC 24843) GN=SPAC5D6.04 PE=3 SV=1//4.05435e-08
Cla003924	67.2827	1.16837	5.8477	2.2507e-13	5.6718e-12	up	sp|Q9SIC7|Y2142_ARATH B3 domain-containing protein At2g31420 OS=Arabidopsis thaliana GN=At2g31420 PE=3 SV=1//7.08305e-12
Cla003933	296.545	32.384	3.1949	2.0369e-23	1.3753e-21	up	sp|Q9CAC5|NDHL_ARATH NAD(P)H-quinone oxidoreductase subunit L, chloroplastic OS=Arabidopsis thaliana GN=ndhL PE=2 SV=1//1.84264e-54
Cla003935	3230.96	2302.26	0.48891	0.0016478	0.0065582	up	sp|O22161|ADLO1_ARATH Protein ARABIDILLO 1 OS=Arabidopsis thaliana GN=FBX5 PE=1 SV=1//1.04156e-06
Cla003954	581.116	362.908	0.67922	0.00071043	0.0031715	up	sp|Q86TU7|SETD3_HUMAN Histone-lysine N-methyltransferase setd3 OS=Homo sapiens GN=SETD3 PE=1 SV=1//2.48241e-19
Cla003972	57.5607	0.72076	6.3194	4.9356e-12	1.0585e-10	up	sp|Q43636|TRXH_RICCO Thioredoxin H-type OS=Ricinus communis PE=3 SV=1//9.53734e-40
Cla003973	245.226	0	Inf	6.8153e-09	9.0109e-08	up	sp|P29448|TRXH1_ARATH Thioredoxin H1 OS=Arabidopsis thaliana GN=TRX1 PE=1 SV=1//2.33279e-41
Cla003974	40.0835	14.316	1.4854	0.014463	0.042123	up	-//-
Cla003977	7155.67	983.963	2.8624	1.8624e-06	1.54e-05	up	sp|Q39547|CUCM1_CUCME Cucumisin OS=Cucumis melo PE=1 SV=1//0
Cla003980	6522.26	2835.93	1.2015	1.4366e-15	4.8838e-14	up	sp|Q54MZ4|MCFB_DICDI Mitochondrial substrate carrier family protein B OS=Dictyostelium discoideum GN=mcfB PE=3 SV=1//1.30395e-23
Cla003982	1878.47	709.101	1.4055	6.8679e-12	1.4398e-10	up	sp|Q0WSN2|DAR2_ARATH Protein DA1-related 2 OS=Arabidopsis thaliana GN=DAR2 PE=2 SV=1//0
Cla003985	4613.21	2892.55	0.67343	0.00017669	0.00092335	up	sp|Q9FN03|UVR8_ARATH Ultraviolet-B receptor UVR8 OS=Arabidopsis thaliana GN=UVR8 PE=1 SV=1//4.47024e-10
Cla003988	2079.41	1209.89	0.7813	1.3529e-06	1.1533e-05	up	sp|Q9VD44|GLD2A_DROME Poly(A) RNA polymerase gld-2 homolog A OS=Drosophila melanogaster GN=Gld2 PE=1 SV=3//5.34523e-20
Cla003994	53.691	0.682628	6.2974	0.00013387	0.00072294	up	sp|Q9LHS8|LBD33_ARATH LOB domain-containing protein 33 OS=Arabidopsis thaliana GN=LBD33 PE=2 SV=1//2.14214e-56
Cla004016	691.687	404.042	0.77561	6.4318e-05	0.00037595	up	-//-
Cla004024	7181.76	1442.65	2.3156	3.4138e-09	4.7207e-08	up	sp|O80638|WTR14_ARATH WAT1-related protein At2g39510 OS=Arabidopsis thaliana GN=At2g39510 PE=2 SV=1//6.61541e-124
Cla004032	13.4452	1.08479	3.6316	0.012865	0.038181	up	-//-
Cla004033	294.427	76.0422	1.953	1.1381e-12	2.631e-11	up	-//-
Cla004034	29.3491	6.25912	2.2293	0.005461	0.0185	up	-//-
Cla004046	445.691	284.577	0.64722	0.0025134	0.0094736	up	-//-
Cla004048	3675.57	1822.02	1.0124	6.8105e-11	1.2314e-09	up	sp|Q86TU7|SETD3_HUMAN Histone-lysine N-methyltransferase setd3 OS=Homo sapiens GN=SETD3 PE=1 SV=1//5.15091e-19
Cla004058	7736.77	4666.45	0.72941	0.00092427	0.0039705	up	sp|Q9LK32|Y3721_ARATH Uncharacterized protein At3g27210 OS=Arabidopsis thaliana GN=Y-2 PE=1 SV=1//1.34015e-20
Cla004061	27805.1	18167.9	0.61396	9.2567e-05	0.000521	up	sp|Q67ZU1|LIP2_ARATH Triacylglycerol lipase 2 OS=Arabidopsis thaliana GN=LIP2 PE=2 SV=1//7.3453e-173
Cla004062	904.699	573.365	0.65798	0.00024132	0.001221	up	sp|Q6M9M7|Y1998_PARUW Uncharacterized RNA methyltransferase pc1998 OS=Protochlamydia amoebophila (strain UWE25) GN=pc1998 PE=3 SV=1//1.95082e-77
Cla004063	4461.27	2290.12	0.96203	2.3345e-10	3.8937e-09	up	sp|P82024|RR21_SPIOL 30S ribosomal protein S21, chloroplastic (Fragment) OS=Spinacia oleracea GN=rps21 PE=1 SV=1//2.61968e-15
Cla004066	404.531	122.062	1.7286	4.1428e-12	9.0033e-11	up	sp|Q9LI89|FBK70_ARATH F-box/kelch-repeat protein At3g27150 OS=Arabidopsis thaliana GN=At3g27150 PE=2 SV=1//3.35181e-133
Cla004072	1365.97	824.484	0.72836	2.4318e-05	0.00015788	up	sp|Q8TP15|HTPX2_METAC Protease HtpX homolog 2 OS=Methanosarcina acetivorans (strain ATCC 35395 / DSM 2834 / JCM 12185 / C2A) GN=htpX2 PE=3 SV=1//6.28952e-11
Cla004073	19620	13816.2	0.50596	0.00043119	0.0020468	up	sp|P37707|B2_DAUCA B2 protein OS=Daucus carota PE=2 SV=1//2.93064e-57
Cla004075	2129.09	1521.62	0.48463	0.0021064	0.0081271	up	sp|P0AFR6|YCIO_SHIFL Uncharacterized protein YciO OS=Shigella flexneri GN=yciO PE=3 SV=1//1.44934e-28
Cla004079	175.694	85.0191	1.0472	0.00082334	0.0035954	up	-//-
Cla004090	987.749	492.611	1.0037	5.7734e-08	6.4014e-07	up	sp|P0DI11|SP13B_ARATH Squamosa promoter-binding-like protein 13B OS=Arabidopsis thaliana GN=SPL13B PE=3 SV=1//3.26762e-41
Cla004098	4500.07	3107.57	0.53416	0.00047957	0.0022414	up	sp|Q8S3D1|BH068_ARATH Transcription factor bHLH68 OS=Arabidopsis thaliana GN=BHLH68 PE=2 SV=2//4.07938e-76
Cla004102	8295.07	1236.05	2.7465	9.6425e-43	2.3026e-40	up	sp|Q9ZSY8|IAA27_ARATH Auxin-responsive protein IAA27 OS=Arabidopsis thaliana GN=IAA27 PE=1 SV=1//1.34742e-91
Cla004119	417.037	290.353	0.52237	0.016707	0.047488	up	sp|Q9FFN2|GLYT3_ARATH Probable glycosyltransferase At5g03795 OS=Arabidopsis thaliana GN=At5g03795 PE=3 SV=2//8.7235e-86
Cla004164	2474.54	1057.74	1.2262	5.7712e-14	1.5939e-12	up	sp|Q9ZP55|DRP4C_ARATH Dynamin-related protein 4C OS=Arabidopsis thaliana GN=DRP4C PE=2 SV=1//0
Cla004173	723.501	120.761	2.5828	4.4872e-06	3.4269e-05	up	sp|P51910|APOD_MOUSE Apolipoprotein D OS=Mus musculus GN=Apod PE=2 SV=1//1.6725e-10
Cla004194	165.092	8.90606	4.2123	6.0482e-12	1.2873e-10	up	-//-
Cla004222	12472.5	8243.26	0.59746	4.3635e-05	0.00026494	up	sp|P35133|UBC10_ARATH Ubiquitin-conjugating enzyme E2 10 OS=Arabidopsis thaliana GN=UBC10 PE=1 SV=1//1.68594e-106
Cla004234	217.201	132.426	0.71385	0.0085741	0.027136	up	sp|Q9ZNX9|SIGE_ARATH RNA polymerase sigma factor sigE, chloroplastic/mitochondrial OS=Arabidopsis thaliana GN=SIGE PE=1 SV=1//0
Cla004239	1294.49	154.024	3.0712	1.333e-13	3.4708e-12	up	-//-
Cla004240	1799.94	588.846	1.612	7.9107e-21	4.4384e-19	up	sp|O65717|CNGC1_ARATH Cyclic nucleotide-gated ion channel 1 OS=Arabidopsis thaliana GN=CNGC1 PE=1 SV=1//1.52858e-153
Cla004241	65.703	8.87632	2.8879	7.0741e-07	6.3804e-06	up	sp|O65717|CNGC1_ARATH Cyclic nucleotide-gated ion channel 1 OS=Arabidopsis thaliana GN=CNGC1 PE=1 SV=1//3.74171e-139
Cla004248	13722.6	5707.88	1.2655	1.1804e-07	1.2447e-06	up	sp|Q9LV04|PAP14_ARATH Probable plastid-lipid-associated protein 14, chloroplastic OS=Arabidopsis thaliana GN=PAP14 PE=1 SV=1//0
Cla004250	3956.61	884.97	2.1606	0.00021241	0.0010902	up	sp|Q9FHH8|COL5_ARATH Zinc finger protein CONSTANS-LIKE 5 OS=Arabidopsis thaliana GN=COL5 PE=2 SV=2//8.41467e-08
Cla004251	2681.85	1406.19	0.93144	6.9256e-06	5.0962e-05	up	sp|Q9M3B0|PME34_ARATH Probable pectinesterase/pectinesterase inhibitor 34 OS=Arabidopsis thaliana GN=PME34 PE=2 SV=1//0
Cla004255	2910.43	1883.48	0.62783	4.4969e-05	0.00027202	up	sp|Q84JL3|SINA3_ARATH E3 ubiquitin-protein ligase SINAT3 OS=Arabidopsis thaliana GN=SINAT3 PE=2 SV=1//0
Cla004265	281.097	188.637	0.57545	0.015866	0.04552	up	sp|Q753M3|PCC1_ASHGO EKC/KEOPS complex subunit PCC1 OS=Ashbya gossypii (strain ATCC 10895 / CBS 109.51 / FGSC 9923 / NRRL Y-1056) GN=PCC1 PE=3 SV=1//7.76296e-06
Cla004268	305.701	161.237	0.92294	0.000174	0.00091134	up	sp|Q8VZV9|PTA7_ARATH Protein PLASTID TRANSCRIPTIONALLY ACTIVE 7 OS=Arabidopsis thaliana GN=PTAC7 PE=1 SV=1//8.51974e-64
Cla004269	3204.32	2390.3	0.42283	0.005244	0.017901	up	sp|P49599|P2C57_ARATH Protein phosphatase 2C 57 OS=Arabidopsis thaliana GN=PPH1 PE=1 SV=2//1.07619e-171
Cla004271	1536.52	546.143	1.4923	7.8735e-18	3.4033e-16	up	sp|P81760|TL17_ARATH Thylakoid lumenal 17.4 kDa protein, chloroplastic OS=Arabidopsis thaliana GN=At5g53490 PE=1 SV=2//1.33713e-100
Cla004279	849.704	496.36	0.77557	2.9586e-05	0.00018754	up	sp|Q2EF88|YSL3_ARATH Metal-nicotianamine transporter YSL3 OS=Arabidopsis thaliana GN=YSL3 PE=2 SV=1//0
Cla004286	579.955	231.944	1.3222	4.4893e-10	7.1818e-09	up	-//-
Cla004294	264.786	45.3112	2.5469	9.3418e-17	3.6731e-15	up	sp|Q9LUH3|LAL5_ARATH MATE efflux family protein LAL5 OS=Arabidopsis thaliana GN=LAL5 PE=2 SV=1//5.41088e-162
Cla004295	1273.52	407.343	1.6445	1.131e-19	5.6931e-18	up	sp|E0CSI1|MTBC1_VITVI Probable bifunctional methylthioribulose-1-phosphate dehydratase/enolase-phosphatase E1 1 OS=Vitis vinifera GN=VIT_19s0014g02480 PE=3 SV=2//5.28323e-32
Cla004298	1608.66	1081.53	0.57279	0.00051329	0.0023772	up	sp|F4I114|Y1960_ARATH Probable serine/threonine-protein kinase At1g09600 OS=Arabidopsis thaliana GN=At1g09600 PE=3 SV=1//0
Cla004301	19.993	0	Inf	2.5617e-05	0.00016516	up	-//-
Cla004311	29.7785	7.88133	1.9178	0.014057	0.041134	up	sp|U3U992|UGT8_CATRO 7-deoxyloganetic acid glucosyltransferase OS=Catharanthus roseus GN=UGT709C2 PE=1 SV=1//1.66943e-177
Cla004328	8619.54	1960.33	2.1365	1.0434e-10	1.8324e-09	up	sp|Q8S9H7|DIV_ANTMA Transcription factor DIVARICATA OS=Antirrhinum majus GN=DIVARICATA PE=2 SV=1//9.44962e-96
Cla004334	180.005	28.3033	2.669	4.6786e-13	1.1423e-11	up	sp|Q39196|PIP14_ARATH Probable aquaporin PIP1-4 OS=Arabidopsis thaliana GN=PIP1.4 PE=1 SV=1//0
Cla004335	38.0569	9.11082	2.0625	0.0023263	0.0088447	up	sp|Q39196|PIP14_ARATH Probable aquaporin PIP1-4 OS=Arabidopsis thaliana GN=PIP1.4 PE=1 SV=1//0
Cla004340	901.082	496.278	0.86051	2.029e-06	1.6637e-05	up	sp|P59234|YIPL_SOLTU Protein yippee-like OS=Solanum tuberosum PE=2 SV=1//3.35593e-69
Cla004350	2811.03	1967	0.5151	0.0010024	0.0042582	up	sp|Q9GZU7|CTDS1_HUMAN Carboxy-terminal domain RNA polymerase II polypeptide A small phosphatase 1 OS=Homo sapiens GN=CTDSP1 PE=1 SV=1//1.14005e-17
Cla004354	8668.29	5932.3	0.54716	0.00028774	0.001426	up	sp|Q9XEE6|C3H29_ARATH Zinc finger CCCH domain-containing protein 29 OS=Arabidopsis thaliana GN=At2g40140 PE=2 SV=1//0
Cla004355	61.8463	17.9939	1.7812	0.0008556	0.0037098	up	sp|Q42440|PAI1_ARATH N-(5&apos;-phosphoribosyl)anthranilate isomerase 1, chloroplastic OS=Arabidopsis thaliana GN=PAI1 PE=2 SV=1//1.33888e-98
Cla004361	111.158	33.5345	1.7289	2.9032e-05	0.00018445	up	sp|Q8RX37|P2C02_ARATH Probable protein phosphatase 2C 2 OS=Arabidopsis thaliana GN=At1g07160 PE=2 SV=1//1.54126e-107
Cla004362	71.468	21.6437	1.7234	0.0003387	0.0016493	up	sp|Q9FDW1|MYB44_ARATH Transcription factor MYB44 OS=Arabidopsis thaliana GN=MYB44 PE=2 SV=1//2.88554e-41
Cla004363	2829.11	1357.87	1.059	3.0973e-07	3.0279e-06	up	-//-
Cla004396	1502.19	149.97	3.3243	3.7584e-28	3.7935e-26	up	sp|O22822|U74F2_ARATH UDP-glycosyltransferase 74F2 OS=Arabidopsis thaliana GN=UGT74F2 PE=1 SV=1//5.36801e-168
Cla004412	5626.2	2482.01	1.1806	5.4522e-15	1.7247e-13	up	sp|B2V855|GATA_SULSY Glutamyl-tRNA(Gln) amidotransferase subunit A OS=Sulfurihydrogenibium sp. (strain YO3AOP1) GN=gatA PE=3 SV=1//3.05199e-50
Cla004421	1206.15	666.268	0.85624	1.1133e-06	9.6382e-06	up	sp|Q9LN77|P2A12_ARATH F-box protein PP2-A12 OS=Arabidopsis thaliana GN=P2A12 PE=2 SV=1//1.34576e-115
Cla004424	434.572	264.144	0.71827	0.010571	0.032484	up	sp|Q921X6|RPC6_MOUSE DNA-directed RNA polymerase III subunit RPC6 OS=Mus musculus GN=Polr3f PE=1 SV=1//1.3409e-28
Cla004429	1643.98	1091.42	0.59098	0.00049337	0.0022969	up	-//-
Cla004431	1925.86	1181.84	0.70447	6.0296e-05	0.00035519	up	sp|Q9FG77|WRKY2_ARATH Probable WRKY transcription factor 2 OS=Arabidopsis thaliana GN=WRKY2 PE=2 SV=1//1.55263e-179
Cla004433	13063	9047.05	0.52997	0.017524	0.049493	up	-//-
Cla004445	794.511	554.677	0.51842	0.0051667	0.017687	up	sp|Q9ZSP5|AIR3_ARATH Subtilisin-like protease SBT5.3 OS=Arabidopsis thaliana GN=AIR3 PE=2 SV=1//0
Cla004452	384.064	120.266	1.6751	2.8396e-05	0.00018106	up	sp|P46484|COMT1_EUCGU Caffeic acid 3-O-methyltransferase OS=Eucalyptus gunnii GN=OMT PE=2 SV=1//2.5462e-106
Cla004455	88.8046	37.481	1.2445	0.0034973	0.012658	up	-//-
Cla004456	290.436	172.846	0.74874	0.0026387	0.0098774	up	-//-
Cla004463	1415.12	629.689	1.1682	1.1759e-11	2.401e-10	up	sp|Q9FM67|TI205_ARATH Protein TIC 20-v, chloroplastic OS=Arabidopsis thaliana GN=TIC20-V PE=2 SV=1//2.45002e-80
Cla004477	460.592	272.116	0.75927	0.00060328	0.0027363	up	sp|F4K687|NMNAT_ARATH Nicotinamide/nicotinic acid mononucleotide adenylyltransferase OS=Arabidopsis thaliana GN=NMNAT PE=2 SV=1//5.49704e-120
Cla004480	17939.7	12497.2	0.52155	0.00031196	0.0015329	up	sp|Q5B020|CWC15_EMENI Pre-mRNA-splicing factor cwc15 OS=Emericella nidulans (strain FGSC A4 / ATCC 38163 / CBS 112.46 / NRRL 194 / M139) GN=cwc15 PE=3 SV=1//1.16808e-18
Cla004481	8742.45	6156.36	0.50596	0.00057485	0.0026183	up	sp|Q9Y7K5|YGI3_SCHPO Uncharacterized WD repeat-containing protein C2A9.03 OS=Schizosaccharomyces pombe (strain 972 / ATCC 24843) GN=SPBC2A9.03 PE=3 SV=2//2.02097e-32
Cla004483	12950.3	8836.33	0.55147	0.017276	0.048856	up	sp|Q9S7N7|PSAG_ARATH Photosystem I reaction center subunit V, chloroplastic OS=Arabidopsis thaliana GN=PSAG PE=2 SV=1//1.89691e-66
Cla004486	650.728	245.344	1.4073	0.00011785	0.00064565	up	sp|Q52K82|CML21_ARATH Probable calcium-binding protein CML21 OS=Arabidopsis thaliana GN=CML21 PE=2 SV=1//1.43621e-104
Cla004490	395.718	229.11	0.78843	0.00257	0.0096589	up	-//-
Cla004492	631.912	405.856	0.63876	0.001496	0.0060137	up	sp|Q93WV0|WRK20_ARATH Probable WRKY transcription factor 20 OS=Arabidopsis thaliana GN=WRKY20 PE=2 SV=1//7.85386e-179
Cla004493	366.53	116.677	1.6514	9.1102e-11	1.6236e-09	up	sp|Q6ICW6|WNK11_ARATH Probable serine/threonine-protein kinase WNK11 OS=Arabidopsis thaliana GN=WNK11 PE=2 SV=1//8.34384e-171
Cla004497	1909.21	1287.77	0.5681	0.0029274	0.010825	up	sp|Q94EH2|TI222_ARATH Mitochondrial import inner membrane translocase subunit TIM22-2 OS=Arabidopsis thaliana GN=TIM22-2 PE=1 SV=1//2.22201e-63
Cla004504	559.112	376.426	0.57077	0.0037866	0.013567	up	sp|Q9C6Z2|NUD25_ARATH Nudix hydrolase 25 OS=Arabidopsis thaliana GN=NUDT25 PE=1 SV=1//5.2275e-100
Cla004527	24.1638	0	Inf	0.00061091	0.0027677	up	sp|Q84WS0|SBT11_ARATH Subtilisin-like protease SBT1.1 OS=Arabidopsis thaliana GN=SBTI1.1 PE=1 SV=1//0
Cla004534	573.967	238.541	1.2667	0.00014032	0.0007536	up	sp|Q8H1D6|RBK1_ARATH Receptor-like cytosolic serine/threonine-protein kinase RBK1 OS=Arabidopsis thaliana GN=RBK1 PE=1 SV=1//0
Cla004545	1147.21	780.362	0.55592	0.0014039	0.0056887	up	sp|Q56X46|MSL2_ARATH Mechanosensitive ion channel protein 2, chloroplastic OS=Arabidopsis thaliana GN=MSL2 PE=2 SV=1//0
Cla004549	984.268	662.882	0.5703	0.0015765	0.0063039	up	sp|Q55909|Y305_SYNY3 TVP38/TMEM64 family membrane protein slr0305 OS=Synechocystis sp. (strain PCC 6803 / Kazusa) GN=slr0305 PE=3 SV=1//2.83938e-11
Cla004565	2621.79	907.355	1.5308	6.7061e-12	1.4104e-10	up	sp|O64728|STI_ARATH Protein STICHEL OS=Arabidopsis thaliana GN=STI PE=1 SV=2//0
Cla004566	487.923	292.539	0.73803	0.0004289	0.0020364	up	sp|P69834|ISPD_ARATH 2-C-methyl-D-erythritol 4-phosphate cytidylyltransferase, chloroplastic OS=Arabidopsis thaliana GN=ISPD PE=1 SV=1//1.23605e-25
Cla004579	17.1163	2.1769	2.975	0.011576	0.035024	up	sp|A5PMU4|ANS1B_DANRE Ankyrin repeat and sterile alpha motif domain-containing protein 1B OS=Danio rerio GN=anks1b PE=3 SV=1//3.04192e-11
Cla004580	3415.73	2430.55	0.49091	0.0015913	0.0063617	up	sp|Q91Z38|TTC1_MOUSE Tetratricopeptide repeat protein 1 OS=Mus musculus GN=Ttc1 PE=2 SV=1//8.0146e-14
Cla004584	6590.67	2678.92	1.2988	1.3423e-17	5.6404e-16	up	sp|Q56X52|AOX4_ARATH Ubiquinol oxidase 4, chloroplastic/chromoplastic OS=Arabidopsis thaliana GN=AOX4 PE=1 SV=2//3.46575e-156
Cla004589	3900.3	3020.03	0.36902	0.01672	0.047511	up	sp|Q9SUG6|PUX3_ARATH Plant UBX domain-containing protein 3 OS=Arabidopsis thaliana GN=PUX3 PE=1 SV=1//5.77626e-129
Cla004596	11696.2	3514.2	1.7348	3.5688e-06	2.7896e-05	up	sp|Q5XEZ5|CSC1_ARATH Calcium permeable stress-gated cation channel 1 OS=Arabidopsis thaliana GN=CSC1 PE=2 SV=1//0
Cla004602	1353.86	805.589	0.74897	0.00047353	0.0022172	up	sp|Q5XEZ5|CSC1_ARATH Calcium permeable stress-gated cation channel 1 OS=Arabidopsis thaliana GN=CSC1 PE=2 SV=1//2.10031e-83
Cla004604	501.941	302.694	0.72966	0.0003772	0.0018174	up	sp|P42856|ZB14_MAIZE 14 kDa zinc-binding protein OS=Zea mays GN=ZBP14 PE=1 SV=1//2.08852e-42
Cla004606	1672.72	936.06	0.83752	9.8991e-05	0.0005527	up	sp|Q5S2C4|NCKP1_ARATH Protein NAP1 OS=Arabidopsis thaliana GN=NAP1 PE=1 SV=2//0
Cla004609	2954.61	1604.84	0.88054	3.0411e-05	0.00019246	up	sp|O82179|GCSH2_ARATH Glycine cleavage system H protein 2, mitochondrial OS=Arabidopsis thaliana GN=GDH2 PE=2 SV=1//6.95997e-89
Cla004626	61.4899	13.2671	2.2125	0.00040772	0.0019486	up	sp|Q6NQK2|NAC8_ARATH NAC domain-containing protein 8 OS=Arabidopsis thaliana GN=NAC008 PE=2 SV=1//6.68623e-74
Cla004628	1043	710.427	0.55398	0.0072043	0.023345	up	sp|Q02527|MGAT3_RAT Beta-1,4-mannosyl-glycoprotein 4-beta-N-acetylglucosaminyltransferase OS=Rattus norvegicus GN=Mgat3 PE=1 SV=2//1.99433e-17
Cla004631	2988.75	2313.85	0.36924	0.016646	0.04734	up	sp|Q9RB36|TRUB_FLAJ1 tRNA pseudouridine synthase B OS=Flavobacterium johnsoniae (strain ATCC 17061 / DSM 2064 / UW101) GN=truB PE=3 SV=1//1.97583e-53
Cla004641	106.196	31.2527	1.7647	2.5222e-05	0.0001631	up	-//-
Cla004644	599.019	122.509	2.2897	9.4569e-24	6.5899e-22	up	sp|Q0WPX7|BAG2_ARATH BAG family molecular chaperone regulator 2 OS=Arabidopsis thaliana GN=BAG2 PE=1 SV=1//4.07644e-13
Cla004656	1096.29	436.68	1.328	3.7439e-13	9.2562e-12	up	-//-
Cla004661	550.253	118.024	2.221	0.0044004	0.015453	up	-//-
Cla004662	1084.03	679.825	0.67317	0.00011349	0.00062441	up	sp|Q9VLQ1|ALG5_DROME Dolichyl-phosphate beta-glucosyltransferase OS=Drosophila melanogaster GN=wol PE=1 SV=1//1.02076e-88
Cla004666	391.71	225.988	0.79354	0.00052308	0.0024145	up	-//-
Cla004676	554.443	229.637	1.2717	0.00023906	0.0012118	up	sp|O80928|DOF24_ARATH Dof zinc finger protein DOF2.4 OS=Arabidopsis thaliana GN=DOF2.4 PE=2 SV=1//8.76531e-35
Cla004678	572.796	356.848	0.68271	0.00071542	0.0031876	up	-//-
Cla004679	1979.21	1316.89	0.58779	0.00025814	0.0012931	up	sp|O80642|PGTB1_ARATH Geranylgeranyl transferase type-1 subunit beta OS=Arabidopsis thaliana GN=GGB PE=1 SV=1//5.8036e-176
Cla004680	893.83	414.364	1.1091	5.3933e-06	4.0602e-05	up	-//-
Cla004685	2274.6	1747.37	0.38042	0.01567	0.045074	up	sp|Q9M2T9|SYMM_ARATH Methionine--tRNA ligase, chloroplastic/mitochondrial OS=Arabidopsis thaliana GN=OVA1 PE=2 SV=1//0
Cla004686	2029.39	1262.15	0.68516	1.8115e-05	0.00012174	up	sp|O04469|ECI1_ARATH Enoyl-CoA delta isomerase 1, peroxisomal OS=Arabidopsis thaliana GN=ECI1 PE=1 SV=1//4.49036e-92
Cla004705	3459.71	2406.09	0.52396	0.0010241	0.0043341	up	-//-
Cla004716	702.452	459.024	0.61383	0.0016532	0.0065756	up	sp|Q9FY49|LKHA4_ARATH Leukotriene A-4 hydrolase homolog OS=Arabidopsis thaliana GN=LKHA4 PE=2 SV=1//0
Cla004717	1035	742.833	0.47852	0.0061531	0.02049	up	sp|P36151|YK50_YEAST Uncharacterized protein YKR070W OS=Saccharomyces cerevisiae (strain ATCC 204508 / S288c) GN=YKR070W PE=1 SV=1//8.09205e-43
Cla004739	2613.43	1907.4	0.45434	0.0043266	0.015232	up	-//-
Cla004740	73.6085	2.7232	4.7565	0.0089022	0.028052	up	sp|F4HW04|DPOE1_ARATH DNA polymerase epsilon catalytic subunit A OS=Arabidopsis thaliana GN=POL2A PE=1 SV=1//0
Cla004744	19.0545	0	Inf	4.2375e-05	0.00025833	up	sp|Q84WF6|TET5_ARATH Tetraspanin-5 OS=Arabidopsis thaliana GN=TET5 PE=2 SV=1//2.88485e-88
Cla004755	813.731	91.0867	3.1592	7.6156e-45	1.9621e-42	up	sp|P14133|ASO_CUCSA L-ascorbate oxidase OS=Cucumis sativus PE=1 SV=1//0
Cla004756	2430.88	1007.86	1.2702	1.4992e-11	2.9954e-10	up	-//-
Cla004804	429.1	3.63303	6.884	3.2198e-08	3.7483e-07	up	sp|Q7XKV4|BGL12_ORYSJ Beta-glucosidase 12 OS=Oryza sativa subsp. japonica GN=BGLU12 PE=2 SV=2//0
Cla004821	1242.08	925.32	0.42474	0.014126	0.041313	up	sp|P59278|Y1745_ARATH Uncharacterized protein At1g51745 OS=Arabidopsis thaliana GN=At1g51745 PE=2 SV=2//1.00142e-07
Cla004822	215.906	35.2487	2.6148	5.6058e-15	1.7704e-13	up	-//-
Cla004837	972.46	345.919	1.4912	5.3456e-11	9.81e-10	up	sp|Q9FJP3|RK29_ARATH 50S ribosomal protein L29, chloroplastic OS=Arabidopsis thaliana GN=RPL29 PE=1 SV=1//6.33224e-58
Cla004846	25467.6	3916.19	2.7011	4.8312e-68	3.1533e-65	up	sp|Q9T074|PCKA_ARATH Phosphoenolpyruvate carboxykinase [ATP] OS=Arabidopsis thaliana GN=PCKA PE=1 SV=1//0
Cla004869	139.301	39.0923	1.8332	7.0783e-07	6.3812e-06	up	sp|Q56Y42|PLR1_ARATH Pyridoxal reductase, chloroplastic OS=Arabidopsis thaliana GN=PLR1 PE=1 SV=1//0
Cla004880	572.375	279.407	1.0346	0.0018605	0.0072843	up	sp|Q8LAP8|DOF46_ARATH Dof zinc finger protein DOF4.6 OS=Arabidopsis thaliana GN=DOF4.6 PE=2 SV=2//2.41129e-34
Cla004891	2646.8	1142.26	1.2124	5.0347e-14	1.4063e-12	up	sp|B7KWT4|RUTD_METC4 Putative aminoacrylate hydrolase RutD OS=Methylobacterium extorquens (strain CM4 / NCIMB 13688) GN=rutD PE=3 SV=1//3.46414e-15
Cla004892	14.4488	0.364034	5.3107	0.0019416	0.0075719	up	-//-
Cla004896	5575.14	3893.7	0.51787	0.0070029	0.022782	up	sp|Q9FK05|PME61_ARATH Probable pectinesterase/pectinesterase inhibitor 61 OS=Arabidopsis thaliana GN=PME61 PE=2 SV=1//0
Cla004898	3593.73	1289.44	1.4787	0.0011052	0.0046309	up	sp|Q9FHH8|COL5_ARATH Zinc finger protein CONSTANS-LIKE 5 OS=Arabidopsis thaliana GN=COL5 PE=2 SV=2//1.02071e-08
Cla004902	956.443	701.593	0.44704	0.010121	0.031316	up	sp|O65717|CNGC1_ARATH Cyclic nucleotide-gated ion channel 1 OS=Arabidopsis thaliana GN=CNGC1 PE=1 SV=1//0
Cla004909	19091.3	1219.57	3.9685	3.0628e-09	4.2564e-08	up	sp|Q5NAZ9|SWT3B_ORYSJ Bidirectional sugar transporter SWEET3b OS=Oryza sativa subsp. japonica GN=SWEET3B PE=3 SV=2//9.34662e-42
Cla004910	183.802	27.5393	2.7386	3.1162e-14	9.013e-13	up	sp|Q8GV05|TRY_ARATH Transcription factor TRY OS=Arabidopsis thaliana GN=TRY PE=1 SV=1//1.71441e-33
Cla004912	119.158	30.7523	1.9541	1.6575e-06	1.3864e-05	up	sp|Q9SUQ2|CRF2_ARATH Ethylene-responsive transcription factor CRF2 OS=Arabidopsis thaliana GN=CRF2 PE=1 SV=1//7.01873e-29
Cla004913	14691.3	11126.4	0.40098	0.0055667	0.018803	up	sp|P35133|UBC10_ARATH Ubiquitin-conjugating enzyme E2 10 OS=Arabidopsis thaliana GN=UBC10 PE=1 SV=1//3.08329e-106
Cla004937	3262.56	2536.43	0.3632	0.016004	0.045848	up	sp|P30707|RL9_PEA 60S ribosomal protein L9 OS=Pisum sativum GN=RPL9 PE=2 SV=1//1.034e-124
Cla004939	1226.04	825.064	0.57142	0.00081869	0.0035783	up	-//-
Cla004944	541.57	361.05	0.58495	0.0033318	0.012147	up	sp|Q6PBM8|RBM18_DANRE Probable RNA-binding protein 18 OS=Danio rerio GN=rbm18 PE=2 SV=1//7.31008e-10
Cla004945	64.902	12.5526	2.3703	3.0569e-05	0.00019333	up	-//-
Cla004960	251.876	155.284	0.6978	0.011528	0.034925	up	-//-
Cla004962	225.94	13.7294	4.0406	3.6989e-10	6.0006e-09	up	sp|Q9SV84|NIP51_ARATH Probable aquaporin NIP5-1 OS=Arabidopsis thaliana GN=NIP5-1 PE=2 SV=1//1.29915e-161
Cla004964	200.044	111.039	0.84925	0.010907	0.03334	up	sp|P0DKI6|Y1332_ARATH Probable receptor-like protein kinase At1g33260 OS=Arabidopsis thaliana GN=At1g33260 PE=2 SV=1//7.00003e-104
Cla004965	1265.54	879.532	0.52495	0.0020679	0.0079976	up	sp|Q39117|TGT2_ARATH Trihelix transcription factor GT-2 OS=Arabidopsis thaliana GN=GT-2 PE=2 SV=1//1.6497e-17
Cla004974	40.4807	1.27438	4.9894	2.0294e-07	2.0494e-06	up	sp|O82799|NGA1_ARATH B3 domain-containing transcription factor NGA1 OS=Arabidopsis thaliana GN=NGA1 PE=1 SV=1//1.36199e-59
Cla004976	196.488	90.8449	1.113	0.00014858	0.00079381	up	-//-
Cla004977	542.168	71.5682	2.9213	1.0813e-17	4.6029e-16	up	sp|Q9SZN7|HIP26_ARATH Heavy metal-associated isoprenylated plant protein 26 OS=Arabidopsis thaliana GN=HIPP26 PE=1 SV=1//1.78374e-17
Cla004979	2040.62	168.266	3.6002	1.0692e-78	8.0524e-76	up	sp|Q9LI65|WTR24_ARATH WAT1-related protein At3g30340 OS=Arabidopsis thaliana GN=At3g30340 PE=2 SV=1//7.37212e-106
Cla004983	2167.74	1149.06	0.91574	1.5365e-08	1.9103e-07	up	sp|Q9MAP3|RK11_ARATH 50S ribosomal protein L11, chloroplastic OS=Arabidopsis thaliana GN=RPL11 PE=2 SV=1//1.72298e-51
Cla004990	471.08	213.062	1.1447	3.0175e-07	2.9587e-06	up	sp|Q8L868|E1311_ARATH Glucan endo-1,3-beta-glucosidase 11 OS=Arabidopsis thaliana GN=At1g32860 PE=1 SV=1//1.72936e-175
Cla005005	6531.93	3988.74	0.71158	1.6478e-06	1.3788e-05	up	sp|Q39096|ERD15_ARATH Protein EARLY RESPONSIVE TO DEHYDRATION 15 OS=Arabidopsis thaliana GN=ERD15 PE=1 SV=1//1.09236e-23
Cla005011	2266.72	1420.08	0.67464	2.3206e-05	0.00015122	up	sp|Q43503|LCYB_SOLLC Lycopene beta cyclase, chloroplastic OS=Solanum lycopersicum GN=LCY1 PE=1 SV=1//0
Cla005012	340.874	83.2511	2.0337	3.6185e-14	1.0359e-12	up	sp|O81635|ATK4_ARATH Kinesin-4 OS=Arabidopsis thaliana GN=ATK4 PE=1 SV=2//1.1365e-32
Cla005032	29.2117	6.94175	2.0732	0.009089	0.028535	up	-//-
Cla005035	1042.35	507.568	1.0382	1.6845e-07	1.7244e-06	up	sp|P0CG89|H4_SOYBN Histone H4 OS=Glycine max PE=3 SV=1//1.38043e-52
Cla005036	3569.63	2449.88	0.54306	0.00096912	0.0041325	up	-//-
Cla005042	2681.47	543.366	2.303	0.0018321	0.0071921	up	sp|Q8LEE9|FLA12_ARATH Fasciclin-like arabinogalactan protein 12 OS=Arabidopsis thaliana GN=FLA12 PE=2 SV=2//1.33093e-50
Cla005043	4519.06	3101.46	0.54308	0.00024702	0.001247	up	sp|Q9SCQ6|IDD2_ARATH Protein indeterminate-domain 2 OS=Arabidopsis thaliana GN=IDD2 PE=2 SV=1//3.37761e-85
Cla005048	4424.34	3198.22	0.4682	0.0021403	0.008245	up	sp|Q680Q4|SIZ1_ARATH E3 SUMO-protein ligase SIZ1 OS=Arabidopsis thaliana GN=SIZ1 PE=1 SV=2//0
Cla005055	469.109	268.886	0.80293	0.00014651	0.00078361	up	sp|Q9LXX5|PPD6_ARATH PsbP domain-containing protein 6, chloroplastic OS=Arabidopsis thaliana GN=PPD6 PE=1 SV=1//4.40686e-115
Cla005057	23.5342	4.00437	2.5551	0.0067161	0.021999	up	sp|Q9M1E7|TET3_ARATH Tetraspanin-3 OS=Arabidopsis thaliana GN=TET3 PE=2 SV=1//1.46398e-150
Cla005062	2622.63	1323.58	0.98657	2.916e-10	4.778e-09	up	sp|P25864|RK9_ARATH 50S ribosomal protein L9, chloroplastic OS=Arabidopsis thaliana GN=RPL9 PE=2 SV=1//7.60958e-44
Cla005075	122.593	60.5458	1.0178	0.0047247	0.016415	up	sp|F4I9E1|NFD4_ARATH Protein NUCLEAR FUSION DEFECTIVE 4 OS=Arabidopsis thaliana GN=NFD4 PE=3 SV=1//5.25993e-31
Cla005078	148.927	81.6765	0.86661	0.0065346	0.021537	up	sp|Q4QSC8|SGO1_MAIZE Shugoshin-1 OS=Zea mays GN=SGO1 PE=2 SV=1//2.94093e-14
Cla005082	1096.4	513.929	1.0931	1.9641e-09	2.8134e-08	up	sp|Q9ZUU9|AB3G_ARATH ABC transporter G family member 3 OS=Arabidopsis thaliana GN=ABCG3 PE=1 SV=2//0
Cla005088	54.1711	3.42152	3.9848	9.3238e-05	0.00052444	up	sp|Q9SZN7|HIP26_ARATH Heavy metal-associated isoprenylated plant protein 26 OS=Arabidopsis thaliana GN=HIPP26 PE=1 SV=1//4.21519e-08
Cla005090	39.5487	7.49378	2.3999	0.00081433	0.0035632	up	sp|Q5SPP5|EFR3B_DANRE Protein EFR3 homolog B OS=Danio rerio GN=efr3b PE=3 SV=2//2.42722e-10
Cla005095	1280.05	787.454	0.70093	4.9661e-05	0.00029701	up	sp|Q9FFB3|VP241_ARATH Vacuolar protein sorting-associated protein 24 homolog 1 OS=Arabidopsis thaliana GN=VPS24-1 PE=1 SV=1//1.62332e-71
Cla005100	11.1256	0.318594	5.126	0.010093	0.031245	up	sp|Q9FF46|AB28G_ARATH ABC transporter G family member 28 OS=Arabidopsis thaliana GN=ABCG28 PE=3 SV=1//0
Cla005102	3594.59	2693.44	0.41638	0.0079471	0.025394	up	sp|Q9FFY9|TRP4_ARATH Telomere repeat-binding protein 4 OS=Arabidopsis thaliana GN=TRP4 PE=1 SV=1//1.15382e-09
Cla005103	386.935	192.309	1.0087	0.0014009	0.0056816	up	sp|Q9SJJ3|BLH8_ARATH BEL1-like homeodomain protein 8 OS=Arabidopsis thaliana GN=BLH8 PE=1 SV=1//9.60578e-79
Cla005124	230.587	143.207	0.68721	0.011064	0.033723	up	sp|P24465|C71A1_PERAE Cytochrome P450 71A1 OS=Persea americana GN=CYP71A1 PE=1 SV=2//4.88304e-23
Cla005130	2728.37	2010.19	0.44071	0.0060306	0.020158	up	sp|Q9MA15|Y1796_ARATH Uncharacterized aarF domain-containing protein kinase At1g79600, chloroplastic OS=Arabidopsis thaliana GN=At1g79600 PE=2 SV=1//0
Cla005134	940.999	425.062	1.1465	9.8975e-10	1.4908e-08	up	sp|Q66GM8|PAE10_ARATH Pectin acetylesterase 10 OS=Arabidopsis thaliana GN=PAE10 PE=2 SV=1//0
Cla005153	8326.83	6150.57	0.43705	0.0039222	0.014002	up	sp|O73944|PCP_PYRFU Pyrrolidone-carboxylate peptidase OS=Pyrococcus furiosus (strain ATCC 43587 / DSM 3638 / JCM 8422 / Vc1) GN=pcp PE=1 SV=1//1.42361e-19
Cla005156	428.355	194.841	1.1365	0.0001342	0.00072432	up	sp|O80482|BH149_ARATH Transcription factor bHLH149 OS=Arabidopsis thaliana GN=BHLH149 PE=1 SV=1//2.151e-39
Cla005179	184.603	81.4144	1.1811	8.8149e-05	0.00049886	up	sp|Q682U6|DPD1_ARATH Exonuclease DPD1, chloroplastic/mitochondrial OS=Arabidopsis thaliana GN=DPD1 PE=1 SV=1//3.52056e-81
Cla005181	395.017	200.65	0.97723	2.8934e-05	0.00018401	up	sp|Q9FJ10|GAT16_ARATH GATA transcription factor 16 OS=Arabidopsis thaliana GN=GATA16 PE=2 SV=1//2.79786e-18
Cla005200	729.364	321.63	1.1812	0.00073231	0.0032523	up	sp|Q5J907|TCTP_ELAGV Translationally-controlled tumor protein homolog OS=Elaeis guineensis var. tenera GN=TCTP PE=2 SV=1//1.07614e-93
Cla005212	2692.5	1877.63	0.52003	0.00076158	0.0033632	up	-//-
Cla005219	792.153	372.553	1.0883	1.9424e-05	0.0001295	up	-//-
Cla005220	3543.37	2199.12	0.68819	7.2012e-06	5.2789e-05	up	sp|Q6IV77|TAZ_MACMU Tafazzin OS=Macaca mulatta GN=TAZ PE=2 SV=1//3.54694e-42
Cla005227	675.504	6.68214	6.6595	1.3826e-10	2.379e-09	up	sp|Q8H1F5|IDD7_ARATH Protein indeterminate-domain 7 OS=Arabidopsis thaliana GN=IDD7 PE=2 SV=1//5.14345e-107
Cla005236	8.62562	0	Inf	0.012364	0.036922	up	sp|Q84MC0|UGPI4_ARATH Uncharacterized GPI-anchored protein At3g06035 OS=Arabidopsis thaliana GN=At3g06035 PE=2 SV=1//1.3274e-34
Cla005240	2133.01	631.225	1.7567	1.7731e-25	1.397e-23	up	sp|P30364|ASPG_LUPAN Isoaspartyl peptidase/L-asparaginase OS=Lupinus angustifolius PE=2 SV=1//6.38483e-175
Cla005248	22256.3	14199.4	0.64839	0.0010025	0.0042582	up	sp|Q94BT9|ATOX1_ARATH Copper transport protein ATX1 OS=Arabidopsis thaliana GN=ATX1 PE=1 SV=1//1.33364e-10
Cla005253	131.568	39.111	1.7502	0.0047255	0.016415	up	sp|Q9SK91|BH094_ARATH Transcription factor bHLH94 OS=Arabidopsis thaliana GN=BHLH94 PE=2 SV=2//2.28438e-22
Cla005258	242.463	80.004	1.5996	0.00024242	0.0012259	up	sp|Q9LSQ6|PBP1_ARATH Calcium-binding protein PBP1 OS=Arabidopsis thaliana GN=PBP1 PE=1 SV=1//2.7423e-46
Cla005262	238.185	83.4528	1.5131	2.0027e-07	2.0245e-06	up	-//-
Cla005275	574.02	98.1635	2.5478	3.55e-08	4.1083e-07	up	sp|Q9FIT9|HS217_ARATH 21.7 kDa class VI heat shock protein OS=Arabidopsis thaliana GN=HSP21.7 PE=2 SV=1//2.75317e-61
Cla005289	50.8611	4.19503	3.5998	0.00010271	0.00057117	up	sp|Q8LC95|ENL3_ARATH Early nodulin-like protein 3 OS=Arabidopsis thaliana GN=At5g25090 PE=1 SV=2//5.04015e-28
Cla005293	693.549	458.242	0.59789	0.001557	0.0062346	up	-//-
Cla005294	603.393	224.77	1.4247	1.2716e-11	2.5776e-10	up	sp|Q8VY88|LTD_ARATH Protein LHCP TRANSLOCATION DEFECT OS=Arabidopsis thaliana GN=LTD PE=1 SV=1//2.90971e-71
Cla005295	1560.59	1176.95	0.40704	0.013514	0.039773	up	sp|F4I6M1|POLIA_ARATH DNA polymerase I A, chloroplastic/mitochondrial OS=Arabidopsis thaliana GN=POLIA PE=2 SV=1//0
Cla005307	204.028	120.52	0.75949	0.005885	0.019749	up	sp|Q42670|PLSC_COCNU 1-acyl-sn-glycerol-3-phosphate acyltransferase OS=Cocos nucifera PE=1 SV=1//2.44207e-146
Cla005312	8463.31	3349.38	1.3373	5.7708e-10	9.0616e-09	up	sp|Q94JV4|SUI12_ARATH Protein translation factor SUI1 homolog 2 OS=Arabidopsis thaliana GN=At1g54290 PE=3 SV=1//1.67927e-62
Cla005314	2822.36	990.991	1.51	5.4197e-17	2.1791e-15	up	sp|Q94JQ4|RIDA_ARATH Reactive Intermediate Deaminase A, chloroplastic OS=Arabidopsis thaliana GN=RIDA PE=1 SV=1//5.82073e-88
Cla005331	31.5333	6.82005	2.209	0.0047857	0.016594	up	-//-
Cla005332	3021.18	2023.1	0.57854	0.001958	0.0076298	up	sp|Q43087|PYRB2_PEA Aspartate carbamoyltransferase 2, chloroplastic OS=Pisum sativum GN=PYRB2 PE=2 SV=1//0
Cla005337	144.386	18.0607	2.999	3.7713e-11	7.0889e-10	up	sp|Q9ZU91|E133_ARATH Glucan endo-1,3-beta-glucosidase 3 OS=Arabidopsis thaliana GN=At2g01630 PE=1 SV=2//7.73167e-114
Cla005344	4205.61	2530.2	0.73307	1.9823e-06	1.6309e-05	up	sp|P21357|AROF_SOLTU Phospho-2-dehydro-3-deoxyheptonate aldolase 1, chloroplastic OS=Solanum tuberosum GN=SHKA PE=1 SV=2//0
Cla005359	765.783	483.904	0.66221	0.00047287	0.0022146	up	sp|Q42545|FTSZ1_ARATH Cell division protein FtsZ homolog 1, chloroplastic OS=Arabidopsis thaliana GN=FTSZ1 PE=1 SV=2//0
Cla005364	4029.77	2337.14	0.78595	2.7799e-07	2.7437e-06	up	sp|P92965|RS40_ARATH Serine/arginine-rich splicing factor RS40 OS=Arabidopsis thaliana GN=RS40 PE=1 SV=2//1.37065e-102
Cla005377	497.835	158.472	1.6514	6.3206e-13	1.5075e-11	up	sp|P16273|PRPX_HORVU Pathogen-related protein OS=Hordeum vulgare PE=2 SV=2//4.75716e-64
Cla005382	3053.67	1219	1.3248	1.0635e-16	4.1401e-15	up	sp|Q93ZB6|DCUP1_ARATH Uroporphyrinogen decarboxylase 1, chloroplastic OS=Arabidopsis thaliana GN=HEME1 PE=2 SV=2//0
Cla005383	7438.33	5630.37	0.40175	0.0065397	0.021543	up	sp|Q94A97|UBC35_ARATH Ubiquitin-conjugating enzyme E2 35 OS=Arabidopsis thaliana GN=UBC35 PE=1 SV=1//3.17265e-110
Cla005386	1321.59	938.18	0.49434	0.0033899	0.012313	up	sp|C0LGH3|Y5614_ARATH Probable LRR receptor-like serine/threonine-protein kinase At1g56140 OS=Arabidopsis thaliana GN=At1g56140 PE=2 SV=2//9.02949e-98
Cla005389	4099.99	1628.69	1.3319	9.5554e-11	1.6908e-09	up	sp|Q9LUC3|MPK19_ARATH Mitogen-activated protein kinase 19 OS=Arabidopsis thaliana GN=MPK19 PE=2 SV=2//0
Cla005391	57.4463	22.3325	1.3631	0.01188	0.035733	up	sp|Q9C8L6|PPR80_ARATH Pentatricopeptide repeat-containing protein At1g53600, mitochondrial OS=Arabidopsis thaliana GN=PCMP-E63 PE=2 SV=2//0
Cla005394	255.284	145.48	0.81128	0.0020159	0.0078183	up	sp|Q8H1U4|APC5_ARATH Anaphase-promoting complex subunit 5 OS=Arabidopsis thaliana GN=APC5 PE=1 SV=1//0
Cla005403	6683.2	5005.83	0.41693	0.0052826	0.018018	up	sp|Q9LRR6|CID9_ARATH Polyadenylate-binding protein-interacting protein 9 OS=Arabidopsis thaliana GN=CID9 PE=3 SV=1//2.12418e-119
Cla005412	214.153	14.0412	3.9309	4.0532e-24	2.886e-22	up	sp|Q9C8M5|WAG1_ARATH Serine/threonine-protein kinase WAG1 OS=Arabidopsis thaliana GN=WAG1 PE=2 SV=1//9.55584e-162
Cla005415	1016.6	600.262	0.76008	0.011974	0.035964	up	-//-
Cla005416	235.553	148.005	0.6704	0.010249	0.031655	up	-//-
Cla005420	20803.3	10493.9	0.98726	7.8845e-07	7.0431e-06	up	sp|Q40519|PSBR_TOBAC Photosystem II 10 kDa polypeptide, chloroplastic OS=Nicotiana tabacum GN=PSBR PE=2 SV=1//8.55425e-57
Cla005424	499.967	308.848	0.69493	0.017643	0.049758	up	sp|F4IDQ5|JASON_ARATH Protein JASON OS=Arabidopsis thaliana GN=JASON PE=2 SV=1//1.08049e-93
Cla005425	1751.2	467.149	1.9064	6.4553e-26	5.3334e-24	up	sp|Q9SSU8|PSY_DAUCA Phytoene synthase, chloroplastic OS=Daucus carota GN=PSY PE=2 SV=1//1.87439e-177
Cla005429	20346.6	8997.34	1.1772	4.7775e-11	8.817e-10	up	sp|Q9SLQ8|PSBP_CUCSA Oxygen-evolving enhancer protein 2, chloroplastic OS=Cucumis sativus GN=PSBP PE=2 SV=1//4.99594e-174
Cla005432	1039.66	684.361	0.60328	0.00054719	0.0025101	up	sp|Q54PM7|NAGK_DICDI N-acetyl-D-glucosamine kinase OS=Dictyostelium discoideum GN=nagk PE=3 SV=2//4.71549e-54
Cla005439	4149.92	2679.22	0.63127	3.9152e-05	0.000241	up	-//-
Cla005445	445.841	248.348	0.84416	7.8866e-05	0.00045075	up	sp|O48921|C97B2_SOYBN Cytochrome P450 97B2, chloroplastic OS=Glycine max GN=CYP97B2 PE=2 SV=1//0
Cla005449	577.58	321.597	0.84477	4.3411e-05	0.00026374	up	sp|Q8CG07|WRIP1_RAT ATPase WRNIP1 OS=Rattus norvegicus GN=Wrnip1 PE=2 SV=1//2.27469e-140
Cla005453	2131.38	924.027	1.2058	0.00013824	0.00074366	up	sp|O49675|CCD4_ARATH Probable carotenoid cleavage dioxygenase 4, chloroplastic OS=Arabidopsis thaliana GN=CCD4 PE=1 SV=1//0
Cla005465	1146.5	170.745	2.7473	1.4725e-15	4.9884e-14	up	sp|Q6DBP4|PAE8_ARATH Pectin acetylesterase 8 OS=Arabidopsis thaliana GN=PAE8 PE=2 SV=1//0
Cla005466	15.8669	0	Inf	0.00023261	0.001183	up	sp|O24645|HCBT1_DIACA Anthranilate N-benzoyltransferase protein 1 OS=Dianthus caryophyllus GN=HCBT1 PE=1 SV=1//8.80622e-32
Cla005469	51.4803	11.7667	2.1293	0.00037911	0.0018248	up	sp|F4I9E1|NFD4_ARATH Protein NUCLEAR FUSION DEFECTIVE 4 OS=Arabidopsis thaliana GN=NFD4 PE=3 SV=1//4.89123e-179
Cla005481	830.505	232.668	1.8357	1.5313e-06	1.2891e-05	up	sp|Q9SAK5|APL_ARATH Myb family transcription factor APL OS=Arabidopsis thaliana GN=APL PE=2 SV=2//1.04802e-75
Cla005501	477.375	303.859	0.65172	0.0023527	0.0089383	up	sp|Q9LTV3|SAU72_ARATH Auxin-responsive protein SAUR72 OS=Arabidopsis thaliana GN=SAUR72 PE=2 SV=1//1.6095e-52
Cla005518	55.7346	20.9516	1.4115	0.0079864	0.025497	up	sp|O65399|E131_ARATH Glucan endo-1,3-beta-glucosidase 1 OS=Arabidopsis thaliana GN=At1g11820 PE=1 SV=3//1.78239e-22
Cla005519	174.13	6.56151	4.73	3.14e-10	5.1279e-09	up	-//-
Cla005521	4006.95	1869.9	1.0995	2.5637e-11	4.9506e-10	up	sp|Q680A5|KPRS4_ARATH Ribose-phosphate pyrophosphokinase 4 OS=Arabidopsis thaliana GN=PRS4 PE=1 SV=2//0
Cla005522	11782.7	6036.49	0.96489	7.2652e-11	1.3087e-09	up	sp|Q6ZI17|OML2_ORYSJ Protein MEI2-like 2 OS=Oryza sativa subsp. japonica GN=ML2 PE=2 SV=1//0
Cla005530	288.265	11.7975	4.6108	2.0397e-07	2.0588e-06	up	sp|P35694|XTH2_SOYBN Xyloglucan endotransglucosylase/hydrolase 2 OS=Glycine max PE=2 SV=1//4.65067e-123
Cla005539	3295.11	2136.05	0.62538	0.00013441	0.00072526	up	sp|Q9XGM1|VATD_ARATH V-type proton ATPase subunit D OS=Arabidopsis thaliana GN=VHA-D PE=1 SV=2//1.0063e-161
Cla005542	6386.11	1134.31	2.4931	6.7464e-18	2.9291e-16	up	sp|C0LGE0|Y1765_ARATH Probable LRR receptor-like serine/threonine-protein kinase At1g07650 OS=Arabidopsis thaliana GN=At1g07650 PE=1 SV=1//0
Cla005543	98.1708	10.089	3.2825	9.8414e-11	1.7376e-09	up	sp|Q6DR10|TBL43_ARATH Protein trichome birefringence-like 43 OS=Arabidopsis thaliana GN=TBL43 PE=2 SV=1//1.21629e-146
Cla005550	1178.15	714.663	0.72118	0.00010941	0.00060432	up	sp|B9DFG3|ISE2_ARATH DEAD-box ATP-dependent RNA helicase ISE2, chloroplastic OS=Arabidopsis thaliana GN=ISE2 PE=1 SV=2//0
Cla005556	1456.01	503.088	1.5331	3.7873e-18	1.6778e-16	up	-//-
Cla005558	3448.62	1770.9	0.96154	6.5387e-10	1.0153e-08	up	-//-
Cla005564	1055.83	726.245	0.53985	0.0021438	0.0082553	up	sp|Q9C4Z7|MINE1_ARATH Cell division topological specificity factor homolog, chloroplastic OS=Arabidopsis thaliana GN=MINE1 PE=1 SV=1//2.50738e-71
Cla005581	238.834	76.5251	1.642	3.2584e-08	3.791e-07	up	sp|Q9ZWC6|ATB_ARATH F-box protein At-B OS=Arabidopsis thaliana GN=ATB PE=2 SV=1//2.07776e-137
Cla005582	1015.8	482.859	1.0729	7.0045e-09	9.2448e-08	up	sp|Q8W206|CSN6A_ARATH COP9 signalosome complex subunit 6a OS=Arabidopsis thaliana GN=CSN6A PE=1 SV=2//7.45903e-99
Cla005589	2290.02	1486.24	0.62369	0.00012525	0.00068086	up	sp|Q0WLR1|QKIL1_ARATH KH domain-containing protein At4g26480 OS=Arabidopsis thaliana GN=At4g26480 PE=2 SV=1//1.89649e-54
Cla005596	1766.83	1069.13	0.72473	9.9534e-06	7.0846e-05	up	-//-
Cla005597	3474.2	2395.86	0.53613	0.00046683	0.0021905	up	sp|Q8LB10|CLPR4_ARATH ATP-dependent Clp protease proteolytic subunit-related protein 4, chloroplastic OS=Arabidopsis thaliana GN=CLPR4 PE=1 SV=1//1.90165e-145
Cla005605	225.868	35.3479	2.6758	0.003209	0.011743	up	-//-
Cla005606	5710.85	2512.25	1.1847	3.7646e-15	1.2104e-13	up	sp|Q8W463|RK191_ARATH 50S ribosomal protein L19-1, chloroplastic OS=Arabidopsis thaliana GN=At4g17560 PE=2 SV=1//2.58087e-55
Cla005613	1413.53	176.104	3.0048	9.6142e-21	5.333e-19	up	sp|O80337|EF100_ARATH Ethylene-responsive transcription factor 1A OS=Arabidopsis thaliana GN=ERF1A PE=1 SV=2//5.74219e-61
Cla005615	3548.73	969.566	1.8719	5.314e-31	6.6701e-29	up	sp|Q8L7W2|NUDT8_ARATH Nudix hydrolase 8 OS=Arabidopsis thaliana GN=NUDT8 PE=2 SV=2//2.94956e-128
Cla005618	5609.81	3543.79	0.66266	1.2395e-05	8.6248e-05	up	sp|Q9ZQP1|DSP8_ARATH Putative dual specificity protein phosphatase DSP8 OS=Arabidopsis thaliana GN=DSP8 PE=2 SV=2//1.18043e-119
Cla005619	806.932	372.626	1.1147	0.00014924	0.00079678	up	-//-
Cla005620	4759.89	2165.19	1.1364	2.8601e-05	0.0001823	up	sp|Q05466|HAT4_ARATH Homeobox-leucine zipper protein HAT4 OS=Arabidopsis thaliana GN=HAT4 PE=1 SV=1//4.29608e-95
Cla005621	667.412	398.99	0.74222	0.00012818	0.00069506	up	sp|A6BM06|ACCO1_DICMU 1-aminocyclopropane-1-carboxylate oxidase OS=Dictyostelium mucoroides GN=aco PE=3 SV=1//2.5437e-40
Cla005637	1106.19	639.554	0.79046	7.5765e-06	5.5223e-05	up	sp|O48593|SYNO_ARATH Asparagine--tRNA ligase, chloroplastic/mitochondrial OS=Arabidopsis thaliana GN=SYNO PE=2 SV=3//0
Cla005640	1996.66	1295.22	0.62439	0.010995	0.033567	up	sp|Q8VZP6|GUX8_ARATH Putative glucuronosyltransferase PGSIP8 OS=Arabidopsis thaliana GN=PGSIP8 PE=2 SV=1//2.43436e-142
Cla005641	766.707	418.777	0.87249	0.0089403	0.028158	up	sp|Q8VZP6|GUX8_ARATH Putative glucuronosyltransferase PGSIP8 OS=Arabidopsis thaliana GN=PGSIP8 PE=2 SV=1//2.81966e-25
Cla005659	32.4461	5.5446	2.5489	0.0018006	0.0070784	up	sp|Q9S7I2|AIR1_ARATH Putative lipid-binding protein AIR1 OS=Arabidopsis thaliana GN=AIR1 PE=2 SV=1//6.43962e-24
Cla005663	1006.67	272.702	1.8842	3.5217e-22	2.1822e-20	up	sp|Q05085|PTR7_ARATH Protein NRT1/ PTR FAMILY 6.3 OS=Arabidopsis thaliana GN=NPF6.3 PE=1 SV=1//1.70275e-64
Cla005664	2140.15	406.213	2.3974	4.5664e-42	1.0278e-39	up	sp|Q05085|PTR7_ARATH Protein NRT1/ PTR FAMILY 6.3 OS=Arabidopsis thaliana GN=NPF6.3 PE=1 SV=1//2.37516e-159
Cla005676	37.3552	1.77473	4.3956	6.9984e-05	0.00040591	up	sp|Q6H668|YAB4_ORYSJ Protein YABBY 4 OS=Oryza sativa subsp. japonica GN=YAB4 PE=2 SV=1//1.91635e-51
Cla005678	115.823	15.5119	2.9005	4.363e-07	4.0896e-06	up	sp|Q9ZUZ3|SAU32_ARATH Auxin-responsive protein SAUR32 OS=Arabidopsis thaliana GN=SAUR32 PE=2 SV=1//3.10605e-19
Cla005694	145.354	78.9711	0.88018	0.0074409	0.024015	up	sp|Q9LXU9|IRKI_ARATH IRK-interacting protein OS=Arabidopsis thaliana GN=IRKI PE=1 SV=1//1.12159e-68
Cla005695	273.427	137.684	0.9898	0.00011875	0.00065021	up	-//-
Cla005698	90.7811	28.1586	1.6888	0.00016733	0.00088127	up	sp|C0LGX3|HSL2_ARATH LRR receptor-like serine/threonine-protein kinase HSL2 OS=Arabidopsis thaliana GN=HSL2 PE=2 SV=1//0
Cla005702	105.882	26.947	1.9743	1.8595e-06	1.5383e-05	up	sp|O49545|BAME1_ARATH Leucine-rich repeat receptor-like serine/threonine-protein kinase BAM1 OS=Arabidopsis thaliana GN=BAM1 PE=1 SV=1//3.38829e-11
Cla005764	14170.6	9292.04	0.60884	3.2871e-05	0.00020663	up	sp|O82436|ETR1_CUCMN Ethylene receptor 1 OS=Cucumis melo var. cantalupensis GN=ETR1 PE=2 SV=1//0
Cla005769	255.085	72.7155	1.8106	1.2227e-05	8.5171e-05	up	sp|Q5XQC7|BON3_ARATH Protein BONZAI 3 OS=Arabidopsis thaliana GN=BON3 PE=1 SV=1//0
Cla005772	8101.1	1184.15	2.7743	5.3544e-23	3.4602e-21	up	sp|Q8GXZ3|Y5102_ARATH Serine/threonine-protein kinase At5g01020 OS=Arabidopsis thaliana GN=At5g01020 PE=1 SV=1//2.35275e-91
Cla005775	461.087	295.49	0.64193	0.0027776	0.010338	up	sp|Q9SUH6|PP341_ARATH Pentatricopeptide repeat-containing protein At4g30700 OS=Arabidopsis thaliana GN=DYW9 PE=2 SV=1//0
Cla005776	715.286	400.673	0.83609	1.3392e-05	9.2794e-05	up	sp|Q9SWW6|CESA7_ARATH Cellulose synthase A catalytic subunit 7 [UDP-forming] OS=Arabidopsis thaliana GN=CESA7 PE=1 SV=1//0
Cla005803	146.761	70.335	1.0612	0.016317	0.046587	up	-//-
Cla005809	1403.76	256.219	2.4538	7.8385e-06	5.6994e-05	up	sp|Q39263|ZFP4_ARATH Zinc finger protein 4 OS=Arabidopsis thaliana GN=ZFP4 PE=2 SV=2//1.27673e-34
Cla005811	9067.99	5299.81	0.77484	2.315e-07	2.3151e-06	up	sp|Q94B71|OBE3_ARATH Protein OBERON 3 OS=Arabidopsis thaliana GN=OBE3 PE=1 SV=1//0
Cla005813	2881.12	1313.25	1.1335	8.1287e-06	5.8995e-05	up	sp|Q38909|XTH28_ARATH Probable xyloglucan endotransglucosylase/hydrolase protein 28 OS=Arabidopsis thaliana GN=XTH28 PE=2 SV=1//6.47296e-158
Cla005822	87.7063	19.7253	2.1526	0.010325	0.031844	up	sp|P54120|AIG1_ARATH Protein AIG1 OS=Arabidopsis thaliana GN=AIG1 PE=2 SV=1//1.38012e-57
Cla005823	63.6883	19.7859	1.6866	0.0010211	0.0043242	up	sp|P54120|AIG1_ARATH Protein AIG1 OS=Arabidopsis thaliana GN=AIG1 PE=2 SV=1//5.8572e-28
Cla005829	77.1179	8.90499	3.1144	4.4255e-08	5.0032e-07	up	sp|Q6NLW5|XRI1_ARATH Protein XRI1 OS=Arabidopsis thaliana GN=XRI1 PE=1 SV=2//1.33018e-15
Cla005834	977.81	528.741	0.88699	8.3373e-07	7.4004e-06	up	sp|P0C042|Y4597_ARATH Uncharacterized protein At4g15970 OS=Arabidopsis thaliana GN=At4g15970 PE=2 SV=1//2.89568e-104
[truncated: 6,292 more rows]

## Sheet: O_20vsY_20.DEG
Gene_id	readcount_O_2	readcount_Y_2	log2FoldChange	pval	padj	up_down	Blast swiss prot
[truncated: 5,485 more rows]

[truncated: 7 more sheets: R_20vsO_20.DEG, R_20vsP_20.DEG, R0_2vsW_20.DEG, R_20vsY_20.DEG, Y_20vsP_20.DEG, Y_20vsW_20.DEG, P_20vsW_20.DEG]
